# Supplementary material for: Maintenance of chronic neuroinflammation in multiple sclerosis via interferon signaling and CD8 T cell-mediated cytotoxicity
Source: bioRxiv preprint, doi:10.1101/2025.06.09.658729, version 1 (2025-06-11)
Supplement: Supplementary File 2 [file 658729_file05.xlsx]

## Sheet: csfL1.CellType.markers.L1
p_val	avg_log2FC	pct.1	pct.2	p_val_adj	cluster	gene
0	7.42615	0.818	0.003	0	ASDC	LILRA4
0	8.48283	0.818	0.004	0	ASDC	PPP1R14A
0	7.75879	0.727	0.002	0	ASDC	CLEC4C
0	8.05994	0.727	0.002	0	ASDC	SIGLEC6
0	6.90693	0.364	0.001	0	ASDC	SCT
3.17838944856405e-307	9.63545	0.273	0.001	7.48383579558892e-303	ASDC	AC020914.1
6.57306024145027e-297	8.11745	0.364	0.001	1.54769276445188e-292	ASDC	LRRC26
2.27563558463484e-294	10.9895	0.091	0	5.35821154758119e-290	ASDC	BDKRB2
1.10065403408731e-255	7.74006	0.182	0	2.59159998866198e-251	ASDC	SCARA5
8.66158470354729e-211	12.0759	0.091	0	2.03945673429724e-206	ASDC	AC005162.3
3.9519923648795e-203	8.42043	0.182	0	9.30536122234527e-199	ASDC	SPATC1
1.80556507346303e-200	6.71299	0.364	0.002	4.25138352197604e-196	ASDC	AC007381.1
1.20892665515556e-184	10.4603	0.091	0	2.84653870222927e-180	ASDC	CCDC27
1.20892665515556e-184	10.5054	0.091	0	2.84653870222927e-180	ASDC	AL390860.1
1.13728211296956e-183	6.90445	0.273	0.001	2.67784446319814e-179	ASDC	KCNK10
6.23046979621579e-179	6.18339	0.545	0.004	1.46702641821697e-174	ASDC	DACH1
9.89792265401451e-179	8.69553	0.182	0	2.33056486811426e-174	ASDC	PROC
1.60056677870852e-154	6.43646	0.545	0.005	3.76869453714708e-150	ASDC	LTK
3.5835196979439e-152	6.86324	0.273	0.001	8.43775548077871e-148	ASDC	SMOC1
4.66423341574446e-148	7.28741	0.455	0.003	1.09824040007119e-143	ASDC	SCN9A
3.04843538095738e-142	5.79447	0.727	0.009	7.17784594800225e-138	ASDC	RHEX
9.87659483897699e-135	10.2457	0.091	0	2.32554302078552e-130	ASDC	SHROOM3
1.05518683832192e-134	8.82592	0.091	0	2.48454292951279e-130	ASDC	AC092723.4
1.12732307010862e-134	7.64473	0.091	0	2.65439490087775e-130	ASDC	LINC01724
3.57293977025405e-123	6.81767	0.182	0.001	8.4128439830402e-119	ASDC	ASS1
7.0779938662881e-120	6.37	0.364	0.003	1.6665844357562e-115	ASDC	PPM1J
3.02913499725029e-114	9.66988	0.091	0	7.13240126452553e-110	ASDC	AC002558.2
7.01145623926878e-114	8.12249	0.182	0.001	1.65091748609823e-109	ASDC	AL391832.3
1.78867445610725e-112	7.05452	0.364	0.003	4.21161287435013e-108	ASDC	ST14
1.29642017826615e-110	7.12853	0.273	0.002	3.05255095174547e-106	ASDC	BICC1
1.04593731980899e-107	8.07335	0.182	0.001	2.46276401322225e-103	ASDC	SCN1A-AS1
1.12456636332786e-105	5.48764	0.364	0.003	2.64790395909178e-101	ASDC	TNFRSF21
3.1157602098474e-99	10.1512	0.091	0	7.33636899010668e-95	ASDC	GSN-AS1
7.14877761357476e-99	7.85501	0.182	0.001	1.68325117689231e-94	ASDC	SLC4A3
1.74159657889899e-98	7.42583	0.273	0.002	4.10076330467557e-94	ASDC	KCNK17
3.94414835295267e-97	7.28282	0.182	0.001	9.28689171186236e-93	ASDC	HSPG2
9.56971688480914e-97	5.92456	0.455	0.005	2.25328553769716e-92	ASDC	AC023590.1
1.87451453882317e-95	6.2315	0.364	0.003	4.41373193311304e-91	ASDC	EPHB1
1.37344826191509e-93	5.58605	0.909	0.021	3.23392127750528e-89	ASDC	SERPINF1
4.65291481218653e-93	8.63706	0.091	0	1.09557532167744e-88	ASDC	AL022328.3
1.39697303874914e-90	6.38889	0.818	0.018	3.28931271703871e-86	ASDC	IL3RA
3.89855443814978e-90	6.41878	0.364	0.003	9.17953628006748e-86	ASDC	UPK3A
9.58439719251509e-88	9.94764	0.091	0	2.2567421629496e-83	ASDC	OLFML1
1.07815025738947e-87	8.68218	0.091	0	2.53861259604925e-83	ASDC	KCNE5
8.03810305895594e-87	6.05881	0.273	0.002	1.89265174626177e-82	ASDC	SEMA3C
2.30479724675043e-86	5.65015	0.636	0.011	5.42687559719855e-82	ASDC	BCL11A
6.47907666516346e-83	5.66187	0.636	0.012	1.52556339157939e-78	ASDC	TNNI2
2.71039467534408e-82	5.64967	0.636	0.012	6.38189530256516e-78	ASDC	SPIB
3.65294414440287e-77	6.99116	0.364	0.004	8.60122228241099e-73	ASDC	TSPAN13
1.26536207678317e-72	8.51332	0.636	0.013	2.97942154599364e-68	ASDC	PTGDS
2.00647736862343e-71	5.10515	0.636	0.013	4.72445161216073e-67	ASDC	P2RY6
2.8605416516169e-71	8.26184	0.091	0	6.73543137289715e-67	ASDC	CTSV
2.96137007530982e-71	8.13078	0.091	0	6.97284197932451e-67	ASDC	LINC01976
5.1688595918475e-69	4.98243	0.727	0.018	1.21705967949641e-64	ASDC	MS4A4E
2.289376348043e-68	6.37081	0.182	0.001	5.39056554910206e-64	ASDC	SLC12A3
4.87661775516211e-67	4.94797	0.545	0.01	1.14824841663047e-62	ASDC	PHACTR1
5.36192270349227e-67	5.31883	0.364	0.005	1.26251831976429e-62	ASDC	RETN
6.17579413530539e-66	5.88434	0.364	0.005	1.45415248709901e-61	ASDC	SERPINF2
7.34862102402103e-66	5.38146	0.636	0.015	1.73030630631599e-61	ASDC	KLF4
1.39643911762935e-62	9.17101	0.091	0	3.28805554637007e-58	ASDC	GNMT
1.45038319036617e-62	8.56691	0.091	0	3.41507226003619e-58	ASDC	LINC02147
1.60055405146608e-62	7.32406	0.091	0	3.76866456958203e-58	ASDC	RIBC2
7.83365279009195e-62	5.74394	0.364	0.005	1.84451188595505e-57	ASDC	CD300LB
8.05121964885076e-61	6.30973	0.182	0.001	1.8957401785184e-56	ASDC	BEND6
4.56736867539492e-60	7.93833	0.091	0	1.07543262830849e-55	ASDC	AC006116.8
9.76584990856138e-60	7.2949	0.182	0.001	2.29946701946986e-55	ASDC	CXCR2
1.09282195727866e-59	6.28438	0.182	0.001	2.57315858060833e-55	ASDC	AC007376.2
7.58919225328396e-59	4.70508	0.545	0.012	1.78695120795824e-54	ASDC	PALD1
4.14655958171474e-58	5.2751	0.273	0.003	9.76348919110553e-54	ASDC	ABCB4
7.76362953901969e-58	7.74377	0.091	0	1.82802421125758e-53	ASDC	AC007100.1
7.76362953901969e-58	8.20007	0.091	0	1.82802421125758e-53	ASDC	AC092723.5
1.92752401663717e-57	4.4152	0.364	0.005	4.53854804957388e-53	ASDC	FAM160A1
1.0122449506439e-55	7.45145	0.091	0	2.38343196078614e-51	ASDC	ZNF556
8.91165703425681e-54	6.96302	0.091	0	2.09833876528611e-49	ASDC	AC010623.1
5.69291951111052e-52	7.4703	0.091	0	1.34045482808608e-47	ASDC	AL513493.1
1.17761458260782e-51	4.76185	0.636	0.018	2.77281129620836e-47	ASDC	WDFY4
2.09596449945118e-51	5.57162	0.364	0.006	4.93515801040774e-47	ASDC	SH3BP4
4.5493693644498e-51	4.84177	0.909	0.039	1.07119451055335e-46	ASDC	TCF4
2.79168098726735e-50	6.62287	0.091	0	6.57329205261969e-46	ASDC	AC026369.3
2.87013090167897e-49	3.81235	0.818	0.031	6.75801022109331e-45	ASDC	LILRB4
5.09488708875595e-49	4.39345	0.818	0.032	1.19964211391848e-44	ASDC	CLEC10A
3.52872262044246e-48	5.00925	0.455	0.01	8.30873028209381e-44	ASDC	SLC2A6
3.80051900374824e-48	4.85275	1	0.051	8.94870204622561e-44	ASDC	PLD4
1.31504374887204e-47	5.79451	0.273	0.004	3.0964020110941e-43	ASDC	HLX
3.15693583315231e-47	5.49745	0.455	0.01	7.43332111274042e-43	ASDC	MED12L
5.56083835201024e-46	3.9058	0.636	0.021	1.30935499836433e-41	ASDC	LGMN
6.83245317735375e-46	8.48306	0.091	0	1.60876942513971e-41	ASDC	AC012629.2
6.87023159725198e-46	8.15481	0.091	0	1.61766473188895e-41	ASDC	MIP
1.02920428448105e-44	5.85122	0.182	0.002	2.42336440823908e-40	ASDC	HS3ST1
2.76160901566675e-43	7.53005	0.091	0	6.50248458828892e-39	ASDC	LINC01800
1.47060079143568e-42	4.36545	0.909	0.047	3.46267662351445e-38	ASDC	AFF3
1.78899310756049e-41	3.83001	0.545	0.017	4.21236317106192e-37	ASDC	PLXNB2
2.36274864743699e-41	3.99469	0.727	0.03	5.56332796525513e-37	ASDC	DAB2
4.39317308953778e-41	8.49967	0.091	0	1.03441653566256e-36	ASDC	AL008729.1
4.47197361447375e-41	5.5164	0.182	0.002	1.05297090726399e-36	ASDC	PLS3
4.87637851853478e-40	8.21792	0.091	0	1.1481920859742e-35	ASDC	SGK2
1.96271898344823e-39	4.47998	0.636	0.024	4.62141811842719e-35	ASDC	SULF2
5.53042096462399e-39	7.06103	0.091	0.001	1.30219292033036e-34	ASDC	AC005041.4
2.97159204515334e-38	5.07551	0.273	0.005	6.99691062951805e-34	ASDC	AC064805.1
4.71758256755536e-38	7.5325	0.091	0.001	1.11080199135659e-33	ASDC	OR2B11
9.54799097157306e-38	4.21475	0.727	0.033	2.24816995416659e-33	ASDC	GAPT
6.92079148895692e-37	5.40991	1	0.069	1.6295695639898e-32	ASDC	CCDC50
7.01367432954682e-37	5.64713	0.182	0.002	1.65143975763509e-32	ASDC	MYO5C
1.0985007717239e-36	3.66328	0.636	0.026	2.58652991710109e-32	ASDC	FCER1A
2.39090181077294e-36	7.94879	0.091	0.001	5.62961740364597e-32	ASDC	AC010542.4
4.70789289628131e-36	3.27797	0.818	0.042	1.1085204613584e-31	ASDC	CSF2RA
1.77739858220773e-35	7.22763	0.091	0.001	4.18506270166632e-31	ASDC	AC134312.5
2.77699660516944e-35	5.57793	0.182	0.002	6.53871620653197e-31	ASDC	DNASE1L3
9.7308027708228e-35	7.52229	0.091	0.001	2.29121482041794e-30	ASDC	AC061958.1
1.04393660159328e-34	6.81664	0.091	0.001	2.45805312211154e-30	ASDC	APCDD1
4.51308013099539e-34	4.73446	0.545	0.021	1.06264984764417e-29	ASDC	CD300C
1.45068532184689e-32	6.01745	0.091	0.001	3.41578365882068e-28	ASDC	CYYR1
1.68811375725572e-32	5.79212	0.182	0.002	3.97483265283431e-28	ASDC	MTFR2
3.00043612774251e-31	3.81083	0.545	0.022	7.06482690638252e-27	ASDC	LILRB1
3.33330783531166e-31	4.12165	0.364	0.01	7.84860662902483e-27	ASDC	FLT3
4.87318900463407e-31	4.11496	0.545	0.023	1.14744108303114e-26	ASDC	LRRK1
9.36564516314461e-31	4.9183	0.636	0.031	2.20523481011403e-26	ASDC	IRF8
3.03663994006612e-30	4.92526	0.273	0.006	7.15007240287969e-26	ASDC	MYCL
2.0051763113017e-29	4.81284	0.364	0.011	4.72138814259099e-25	ASDC	TPM2
2.97051472292916e-29	5.24396	0.182	0.003	6.994373966609e-25	ASDC	LINC02356
3.80446911137776e-29	3.80694	0.909	0.067	8.95800296965006e-25	ASDC	ALDH2
3.87945516852657e-29	3.38903	0.636	0.032	9.13456513981267e-25	ASDC	BASP1
7.96582122783157e-29	4.68143	0.364	0.011	1.87563226630522e-24	ASDC	CACNA2D3
6.07394567721533e-28	4.71747	0.273	0.006	1.43017124915712e-23	ASDC	MIR497HG
1.57974720158696e-27	4.94335	0.091	0.001	3.71967276085667e-23	ASDC	ENOX1
1.66854555911657e-27	4.78631	0.455	0.018	3.92875737349587e-23	ASDC	P2RY14
1.7867308886325e-27	3.9218	0.545	0.025	4.20703655037408e-23	ASDC	FES
2.7440741557091e-27	3.34316	0.455	0.018	6.46119700703264e-23	ASDC	AXL
3.43625419709055e-27	4.08741	0.636	0.034	8.09100413246941e-23	ASDC	CXXC5
1.17383257816293e-26	3.678	0.364	0.012	2.76390618854243e-22	ASDC	CBFA2T3
1.25860095631498e-26	6.47709	0.091	0.001	2.96350181173926e-22	ASDC	AC005899.5
1.8172833263857e-26	5.15041	0.182	0.003	4.27897532030777e-22	ASDC	DDIAS
3.08705429970775e-26	7.32495	0.091	0.001	7.26877805409186e-22	ASDC	SLC7A11
7.18956759031346e-26	3.9993	0.636	0.036	1.69285558481521e-21	ASDC	TNFSF13
1.12701197012349e-25	4.81957	0.182	0.003	2.65366238485276e-21	ASDC	THBD
1.17087764686318e-25	6.03577	0.182	0.003	2.75694850730405e-21	ASDC	GOLGA8N
5.35485045071973e-25	6.91614	0.091	0.001	1.26085308712647e-20	ASDC	TNFSF15
8.47348630736576e-25	5.86017	0.364	0.013	1.99516708593234e-20	ASDC	ADAT3
1.16282036864908e-24	7.68369	0.091	0.001	2.73797684002113e-20	ASDC	PLN
2.44137729895196e-24	4.63594	0.182	0.003	5.7484669881123e-20	ASDC	TRPM4
3.56659057295731e-24	6.01281	0.182	0.003	8.39789416308529e-20	ASDC	LINC00877
5.109644325922e-24	4.78115	0.182	0.003	1.20311685298159e-19	ASDC	PYCR1
1.13945480261148e-23	4.17138	0.273	0.008	2.682960278229e-19	ASDC	SOGA1
1.50578704801109e-23	6.09991	0.091	0.001	3.54552618324692e-19	ASDC	AC097375.1
1.63853782364726e-23	4.26469	0.364	0.014	3.85810115955984e-19	ASDC	SIRPB1
2.3264044190072e-23	5.47343	0.182	0.004	5.47775184499435e-19	ASDC	TUSC1
3.39460442624471e-23	6.35335	0.091	0.001	7.9929355820358e-19	ASDC	RAB26
3.39460442624471e-23	6.34203	0.091	0.001	7.9929355820358e-19	ASDC	AC008764.2
6.37581565999145e-23	5.71834	0.182	0.004	1.50124955530159e-18	ASDC	AL121917.1
9.2984066818679e-23	2.8679	0.545	0.03	2.18940283731261e-18	ASDC	KYNU
9.4094868083981e-23	3.38909	0.545	0.03	2.21555776390542e-18	ASDC	GAS6
1.34055261237545e-22	6.89809	0.091	0.001	3.15646518109923e-18	ASDC	IGSF10
2.3890943462179e-22	3.24247	0.455	0.022	5.62536154760466e-18	ASDC	FGD2
3.59816371650934e-22	3.20451	0.636	0.042	8.47223628689289e-18	ASDC	ZNF385A
4.39890179301036e-22	3.69607	0.364	0.014	1.03576541618222e-17	ASDC	IMPA2
5.64154325397337e-22	4.29558	0.455	0.022	1.32835777458057e-17	ASDC	TBC1D9
6.69891672932219e-22	3.57746	0.636	0.043	1.5773269330862e-17	ASDC	BLNK
1.06585800711886e-21	6.3058	0.091	0.001	2.50966926356207e-17	ASDC	MYO1A
1.09867506799877e-21	6.53886	0.091	0.001	2.58694031510991e-17	ASDC	RBPMS
1.11827796961761e-21	6.07989	0.091	0.001	2.63309730726161e-17	ASDC	AL359915.1
1.13535561039086e-21	6.35146	0.091	0.001	2.67330832022632e-17	ASDC	AC117503.5
1.47672391024859e-21	3.22148	0.545	0.032	3.47709411907133e-17	ASDC	HLA-DOA
1.99823423335138e-21	6.53007	0.091	0.001	4.70504232584917e-17	ASDC	GNG11
2.20219592793342e-21	6.10772	0.091	0.001	5.18529053191203e-17	ASDC	AC009318.3
2.37546399669277e-21	4.45495	0.364	0.015	5.59326752661278e-17	ASDC	MYO1E
6.55208321726199e-21	7.12329	0.091	0.001	1.54275351433651e-16	ASDC	MKNK1-AS1
1.16215298957775e-20	2.90701	1	0.108	2.73640542925977e-16	ASDC	HLA-DMB
1.37065072290389e-20	5.2	0.091	0.001	3.2273341921495e-16	ASDC	ZNF366
2.15917807086541e-20	4.80392	0.182	0.004	5.0840006856597e-16	ASDC	AC009495.3
2.44221582623818e-20	3.57701	0.455	0.024	5.75044138446041e-16	ASDC	LRRC25
2.70391842420299e-20	3.96683	0.273	0.009	6.36664632162836e-16	ASDC	CD36
3.00802458596677e-20	5.49375	0.182	0.004	7.08269469011735e-16	ASDC	PLAU
3.11671769679682e-20	4.78717	0.182	0.004	7.3386234888778e-16	ASDC	AC009005.1
3.1231653123333e-20	3.72556	0.909	0.101	7.35380504441998e-16	ASDC	MS4A6A
4.88485389740137e-20	4.7228	0.182	0.004	1.15018769868213e-15	ASDC	ADGRE3
1.25962859591532e-19	6.02847	0.091	0.001	2.96592149194221e-15	ASDC	FBLN2
1.54588689154173e-19	3.21308	0.364	0.016	3.63994527482416e-15	ASDC	SCRN1
2.15033852817829e-19	3.6987	0.455	0.025	5.0631870984486e-15	ASDC	PDLIM7
2.6104031264288e-19	3.02113	0.818	0.08	6.14645520148925e-15	ASDC	RAB31
3.16557013338506e-19	2.74839	0.545	0.035	7.45365143606845e-15	ASDC	CTNND1
4.65975398257963e-19	5.17099	0.273	0.01	1.0971856727382e-14	ASDC	SMPD3
5.83551691965532e-19	3.62404	0.909	0.108	1.37403081390204e-14	ASDC	PLAAT3
6.07498931392558e-19	5.75886	0.091	0.001	1.43041698385692e-14	ASDC	AF064858.1
6.75831661843203e-19	4.45178	0.273	0.01	1.591313230976e-14	ASDC	INSR
8.52386670202121e-19	3.7967	0.182	0.004	2.00702965365791e-14	ASDC	NEGR1
1.16747841190274e-18	2.23263	0.364	0.017	2.7489446686662e-14	ASDC	JCHAIN
1.20745441624194e-18	3.8802	0.364	0.017	2.84307216848326e-14	ASDC	BAIAP2
1.49815743722427e-18	3.98199	0.727	0.069	3.52756150168826e-14	ASDC	CYB561A3
1.53609650191318e-18	5.74484	0.091	0.001	3.61689282340476e-14	ASDC	DNAJC12
1.56596604826743e-18	5.76181	0.091	0.001	3.6872236572505e-14	ASDC	DDX59-AS1
1.6464716948759e-18	3.4182	0.364	0.017	3.87678225275479e-14	ASDC	MILR1
2.82569729263539e-18	4.07046	0.364	0.017	6.6533868452393e-14	ASDC	SPINT1
3.56739903761941e-18	3.43904	0.545	0.039	8.39979777397865e-14	ASDC	CIITA
3.70398003233663e-18	4.06091	0.364	0.018	8.72139138413982e-14	ASDC	CDH23
4.71823536388105e-18	6.1939	0.182	0.005	1.11095569877943e-13	ASDC	FAM20C
4.89862665727244e-18	3.81419	0.545	0.039	1.15343063272137e-13	ASDC	TCEA3
9.39269021220668e-18	5.76724	0.091	0.001	2.21160283736618e-13	ASDC	SDS
1.55402992560628e-17	2.87438	0.727	0.068	3.65911886283254e-13	ASDC	ALCAM
1.89699043408405e-17	3.90526	0.455	0.029	4.46665367609429e-13	ASDC	SUSD1
1.90115690257648e-17	4.24289	0.182	0.005	4.47646404280658e-13	ASDC	RAD51AP1
1.91886186528294e-17	4.19212	0.182	0.005	4.51815214799521e-13	ASDC	BAIAP2-DT
2.25316894151212e-17	5.47273	0.091	0.001	5.30531158968443e-13	ASDC	CEBPB-AS1
2.38378779864191e-17	4.35135	0.182	0.005	5.61286675068224e-13	ASDC	AL049840.5
2.51329830269855e-17	3.24123	0.455	0.028	5.91781218353401e-13	ASDC	MPEG1
4.29893300999605e-17	3.31081	0.909	0.12	1.01222676653367e-12	ASDC	FCGRT
4.31491193445047e-17	7.10429	0.091	0.001	1.01598916408571e-12	ASDC	MPP3
4.53937451589186e-17	4.51534	0.273	0.011	1.0688411235119e-12	ASDC	DAPK2
5.00691106036197e-17	5.61598	0.091	0.001	1.17892727827283e-12	ASDC	AL109840.2
5.25931894078644e-17	3.51668	0.909	0.123	1.23835923779758e-12	ASDC	JAML
6.11290411972233e-17	4.36902	0.182	0.005	1.43934440402982e-12	ASDC	ZCCHC24
7.03544141627191e-17	6.33314	0.091	0.001	1.65656503587538e-12	ASDC	AC022872.1
1.06581977468084e-16	6.02158	0.091	0.001	2.50957924146352e-12	ASDC	TGM2
1.30194418890092e-16	4.10521	0.273	0.011	3.0655577871861e-12	ASDC	SCARB1
1.30318302060731e-16	5.47811	0.182	0.005	3.06847474032198e-12	ASDC	RCN3
1.38865287915629e-16	6.62348	0.091	0.001	3.2697220692614e-12	ASDC	NKAPL
1.99960140094094e-16	5.66727	0.273	0.011	4.70826145865553e-12	ASDC	GAB1
2.29229653179165e-16	5.57	0.091	0.001	5.39744141375662e-12	ASDC	GAS5-AS1
2.78795355121242e-16	7.10998	0.091	0.001	6.56451543168476e-12	ASDC	AC093525.6
2.96901862895673e-16	3.46412	0.273	0.011	6.9908512637415e-12	ASDC	LILRA1
3.73449542852249e-16	4.4348	0.182	0.005	8.79324293599906e-12	ASDC	AC092164.1
4.12100114094554e-16	2.40757	0.636	0.055	9.70330928647037e-12	ASDC	IGSF6
8.2549059371372e-16	3.82689	1	0.182	1.94370015195833e-11	ASDC	PLAC8
8.49361902245319e-16	6.00103	0.091	0.001	1.99990753502683e-11	ASDC	DNMBP-AS1
8.53872929886492e-16	2.58466	0.818	0.09	2.01052920071073e-11	ASDC	LYN
9.24769418586051e-16	2.90351	0.545	0.043	2.17746207300272e-11	ASDC	ATF5
1.17556839306233e-15	2.99392	0.273	0.012	2.76799333830457e-11	ASDC	LINC02397
1.73634203889635e-15	5.5983	0.091	0.001	4.08839096478534e-11	ASDC	KIAA1522
2.14924841929007e-15	4.83308	0.182	0.005	5.06062032806041e-11	ASDC	TUBB6
2.19606484612867e-15	3.81075	0.273	0.012	5.17085428669456e-11	ASDC	RUBCNL
2.56648217073466e-15	2.47283	0.636	0.058	6.04303891921182e-11	ASDC	TPMT
2.72961408690717e-15	3.558	0.909	0.138	6.42714932903163e-11	ASDC	ITM2C
3.14884558588298e-15	4.84204	0.636	0.065	7.41427181652006e-11	ASDC	NBPF14
3.60723562804588e-15	4.01882	0.182	0.005	8.49359700979683e-11	ASDC	AC097634.3
4.14027197785318e-15	2.46663	0.818	0.098	9.74868439905311e-11	ASDC	MEF2C
5.15993824305072e-15	3.95112	0.273	0.012	1.21495905870872e-10	ASDC	RPP25
5.35073091370459e-15	3.75989	0.273	0.012	1.25988310094088e-10	ASDC	SETBP1
6.90849315958904e-15	3.81267	0.182	0.006	1.62667379935684e-10	ASDC	CLEC17A
7.06359582679691e-15	3.4245	0.364	0.021	1.6631942733776e-10	ASDC	SEMA4A
7.29000884841806e-15	3.20516	0.273	0.012	1.71650548344852e-10	ASDC	CNTLN
8.04658366523689e-15	3.90965	0.182	0.006	1.89464858981668e-10	ASDC	GHRL
9.38525366335456e-15	2.64078	0.727	0.079	2.20985182757347e-10	ASDC	LY86
1.06880170216867e-14	2.70692	0.455	0.032	2.51660048792635e-10	ASDC	PRAM1
1.09488446544715e-14	4.34662	0.182	0.006	2.57801496234186e-10	ASDC	MROH8
1.88708487054461e-14	2.03379	0.818	0.096	4.44333003618435e-10	ASDC	CD68
1.96619373225152e-14	3.06814	0.727	0.083	4.62959976195943e-10	ASDC	NOTCH2
1.97607042337806e-14	4.14047	0.545	0.05	4.65285541888598e-10	ASDC	UBE2E2
2.00804516727175e-14	1.97873	0.909	0.117	4.72814315085806e-10	ASDC	GSN
2.23720213362776e-14	6.55837	0.091	0.001	5.26771614383992e-10	ASDC	BAALC-AS1
2.80044438321659e-14	3.20078	0.273	0.013	6.59392634472178e-10	ASDC	PLCB3
3.26680434522834e-14	3.09331	0.818	0.105	7.69201751127465e-10	ASDC	PRCP
3.35053451363541e-14	2.55354	0.545	0.047	7.88916856580594e-10	ASDC	MARCH1
3.7066147452718e-14	3.5826	0.455	0.035	8.72759507921699e-10	ASDC	NAPSA
3.77881128936214e-14	3.58224	0.273	0.013	8.8975890619321e-10	ASDC	ARPIN
4.25745773067415e-14	3.67877	0.273	0.013	1.00246099726453e-09	ASDC	MOB3B
4.28402026922966e-14	3.18503	0.727	0.085	1.00871541259281e-09	ASDC	CTSZ
4.30706257571364e-14	5.21537	0.091	0.002	1.01414095407753e-09	ASDC	PPM1H
4.37556763755783e-14	3.39215	0.455	0.035	1.03027115593937e-09	ASDC	ADAM28
4.5148840878577e-14	3.60182	0.273	0.013	1.06307460732697e-09	ASDC	ST3GAL6
4.9120874685963e-14	6.91077	0.091	0.002	1.15660011535568e-09	ASDC	CUX2
5.74370653815014e-14	3.91849	0.273	0.013	1.35241314147283e-09	ASDC	CHST15
5.90990594823634e-14	4.19352	0.182	0.006	1.39154645457173e-09	ASDC	AC139887.4
6.30554207872377e-14	2.45558	0.909	0.135	1.4847029378563e-09	ASDC	CTSH
7.33388027673019e-14	3.17441	0.455	0.035	1.72683544995889e-09	ASDC	CDKN1A
7.94005611470689e-14	2.0804	0.636	0.063	1.86956561276888e-09	ASDC	CX3CR1
7.99979153067994e-14	3.69451	0.182	0.006	1.8836309138139e-09	ASDC	GUCY1A1
9.46705077895017e-14	5.05793	0.091	0.002	2.22911177641161e-09	ASDC	NPIPB12
1.11975058649598e-13	5.86673	0.091	0.002	2.63656473096344e-09	ASDC	AL139393.3
1.14950009546674e-13	5.50688	0.091	0.002	2.70661292478599e-09	ASDC	LINC00310
2.48059307969505e-13	5.24376	0.091	0.002	5.84080446544996e-09	ASDC	Z99496.2
2.91508142675482e-13	4.86238	0.364	0.025	6.8638507274369e-09	ASDC	METTL7A
4.00091014117167e-13	3.25856	0.364	0.024	9.42054301840281e-09	ASDC	OPN3
4.21206578481928e-13	2.5148	0.636	0.068	9.91773009693548e-09	ASDC	CCDC88A
4.27537188258643e-13	6.36184	0.091	0.002	1.0066790634738e-08	ASDC	AC133065.1
4.82545499923058e-13	3.364	0.273	0.014	1.13620163411883e-08	ASDC	SLC15A3
5.28515233443697e-13	2.66282	0.545	0.052	1.24444196866653e-08	ASDC	CFD
5.58660138939577e-13	5.36533	0.091	0.002	1.31542116314713e-08	ASDC	RGS7
5.76238872236043e-13	2.91567	0.364	0.024	1.35681204856699e-08	ASDC	PPM1F
5.88729147578137e-13	5.6781	0.091	0.002	1.38622165088748e-08	ASDC	SPATA32
7.51031962139155e-13	2.66783	0.545	0.052	1.76837985805285e-08	ASDC	HPS5
8.27800301665174e-13	3.88311	0.182	0.007	1.94913859030082e-08	ASDC	P3H2
8.56081871677639e-13	2.53721	0.455	0.037	2.01573037505217e-08	ASDC	CD33
1.0789608396556e-12	1.91048	0.455	0.037	2.54052119305308e-08	ASDC	SNCA
1.24266530099734e-12	4.10374	0.273	0.015	2.92597971772835e-08	ASDC	DEPTOR
1.90955332562034e-12	2.42264	0.545	0.054	4.49623426050566e-08	ASDC	HCK
1.97260965129799e-12	2.97402	1	0.225	4.64470668494624e-08	ASDC	CST3
2.15810835384427e-12	5.4841	0.091	0.002	5.08148192996171e-08	ASDC	SLC46A2
2.16670524086857e-12	3.4282	0.273	0.015	5.10172416014914e-08	ASDC	TNS3
2.19720005895995e-12	4.53564	0.182	0.007	5.1735272588271e-08	ASDC	KCNMB1
2.62646513437228e-12	2.84178	0.727	0.1	6.18427480539298e-08	ASDC	CLIC3
2.9278221677224e-12	2.13041	0.636	0.072	6.89385007611917e-08	ASDC	TNFSF13B
3.32911331801356e-12	2.88424	0.455	0.04	7.83873021859472e-08	ASDC	FOS
3.90540624420474e-12	3.38445	0.364	0.026	9.19566954260448e-08	ASDC	DAGLB
3.98744454371736e-12	2.8331	0.455	0.041	9.3888369226369e-08	ASDC	SLC8A1
4.20231060053242e-12	3.03487	0.818	0.136	9.89476054001364e-08	ASDC	IFI30
4.48200912685055e-12	2.98151	0.455	0.04	1.05533386900823e-07	ASDC	GRAMD1B
4.67817516016246e-12	4.89989	0.091	0.002	1.10152312321185e-07	ASDC	AP001363.2
5.23326364610571e-12	5.88579	0.091	0.002	1.23222425811205e-07	ASDC	HOXA9
6.91738056088131e-12	2.25614	0.545	0.056	1.62876642686511e-07	ASDC	HDAC9
1.08476245853195e-11	3.06323	0.909	0.171	2.55418168485934e-07	ASDC	HLA-DQA1
1.13245712674897e-11	4.91087	0.091	0.002	2.66648355064313e-07	ASDC	ADORA3
1.32720058358543e-11	2.1964	0.636	0.076	3.12502649411024e-07	ASDC	FGL2
1.35767265232042e-11	1.73866	0.727	0.096	3.19677602715366e-07	ASDC	ZEB2
1.4402940632615e-11	2.13957	0.818	0.122	3.39131640135552e-07	ASDC	SPI1
1.52178765034742e-11	2.97529	0.364	0.027	3.58320120150804e-07	ASDC	VASH1
1.61579182735372e-11	3.00026	0.818	0.148	3.80454343668707e-07	ASDC	GRN
1.82302384287986e-11	5.81217	0.091	0.002	4.29249194044491e-07	ASDC	GAS1
1.8355771731485e-11	3.59711	0.182	0.007	4.32205001189546e-07	ASDC	AC091982.3
1.99184248354278e-11	2.59016	0.364	0.027	4.68999231174982e-07	ASDC	TMEM106A
2.3044632681178e-11	5.33508	0.091	0.002	5.42608921111018e-07	ASDC	CSRP2
2.40336106415759e-11	3.79553	0.182	0.007	5.65895396166546e-07	ASDC	ENHO
2.82812141755867e-11	4.54826	0.273	0.017	6.65909468978363e-07	ASDC	SOX4
3.22534624598816e-11	6.46662	0.091	0.002	7.59440027080373e-07	ASDC	GPR162
3.53202414594475e-11	3.33353	0.636	0.089	8.31650405404151e-07	ASDC	APP
3.62910109735322e-11	2.14086	0.364	0.028	8.5450814438279e-07	ASDC	RBM47
3.65527771091302e-11	4.84617	0.091	0.002	8.60671689811579e-07	ASDC	AC005082.1
3.74683299597982e-11	4.78552	0.091	0.002	8.82229297233409e-07	ASDC	SUCNR1
3.74683299597982e-11	4.35999	0.091	0.002	8.82229297233409e-07	ASDC	FP236383.4
3.9113823812516e-11	2.64933	0.364	0.028	9.20974095489502e-07	ASDC	CLEC4A
4.16034008154727e-11	2.27472	0.364	0.028	9.79593675601121e-07	ASDC	MYOF
4.20149952767691e-11	3.92347	0.182	0.008	9.89285078786806e-07	ASDC	PHETA1
5.0257784304156e-11	4.56626	0.182	0.008	1.18336978922566e-06	ASDC	TLR10
5.33660172771531e-11	3.79645	0.182	0.008	1.25655624280785e-06	ASDC	P2RX1
6.04734737977905e-11	3.36881	0.818	0.154	1.42390841404278e-06	ASDC	PTPRE
6.10387745179518e-11	3.67715	0.182	0.008	1.43721898479969e-06	ASDC	CHRFAM7A
6.83475660322952e-11	3.19382	0.182	0.008	1.60931178979642e-06	ASDC	IQSEC2
6.98291392377215e-11	6.26099	0.091	0.002	1.64419691249139e-06	ASDC	PNMA3
8.1107793623837e-11	5.04301	0.091	0.002	1.90976410866687e-06	ASDC	LRP5
8.19407758812087e-11	2.60403	0.909	0.193	1.92937750889894e-06	ASDC	HLA-DMA
8.7401760973545e-11	3.90393	0.455	0.045	2.05796186388309e-06	ASDC	ST6GALNAC4
8.80765209458028e-11	2.6369	0.727	0.116	2.07384976218987e-06	ASDC	OTULINL
9.06863406148479e-11	2.41008	0.636	0.082	2.13530057611721e-06	ASDC	FUOM
9.61301931130254e-11	2.77338	0.455	0.044	2.2634815270393e-06	ASDC	ZNF124
9.89615164358936e-11	2.51947	0.818	0.145	2.33014786599955e-06	ASDC	LST1
1.00770017937177e-10	4.46134	0.273	0.017	2.37273084234877e-06	ASDC	TBC1D8
1.16000617512827e-10	3.44545	0.182	0.008	2.73135053995701e-06	ASDC	HLA-DOB
1.17867177056121e-10	1.8433	0.727	0.105	2.77530055096342e-06	ASDC	PEA15
1.24945514560268e-10	2.51522	0.545	0.064	2.94196708583607e-06	ASDC	ALOX5
1.28086218472919e-10	3.88195	0.182	0.008	3.01591810016335e-06	ASDC	LRRC27
1.39611908100371e-10	3.6126	0.455	0.047	3.28730198813134e-06	ASDC	MGST2
1.41409238037759e-10	2.9477	0.455	0.046	3.32962191883707e-06	ASDC	LIMD1
1.44960888922763e-10	4.9832	0.091	0.002	3.41324909057537e-06	ASDC	MIR3681HG
1.51759334422611e-10	3.10108	0.273	0.017	3.57332528831479e-06	ASDC	TST
1.65881288975521e-10	4.88162	0.091	0.002	3.90584083021761e-06	ASDC	THSD1
1.78692810538059e-10	5.46624	0.091	0.002	4.20750091692915e-06	ASDC	AC104699.1
1.81177288530679e-10	3.53323	0.182	0.008	4.26600043574336e-06	ASDC	SDSL
2.14045685877463e-10	3.01471	0.273	0.018	5.03991971967075e-06	ASDC	CD72
2.19612635409196e-10	5.0807	0.091	0.002	5.17099911334493e-06	ASDC	AL109809.5
2.21374249899193e-10	3.10187	0.273	0.018	5.21247808812641e-06	ASDC	CCSER1
2.45353080246438e-10	6.25717	0.091	0.002	5.77708362748263e-06	ASDC	AL157838.1
2.58299493035935e-10	2.23774	0.818	0.142	6.08191986302412e-06	ASDC	RNF130
3.16027198522463e-10	4.17949	0.182	0.008	7.4411764164099e-06	ASDC	FBXW9
3.93878176615954e-10	4.64017	0.182	0.009	9.27425554659926e-06	ASDC	KPTN
4.26873820240794e-10	5.6108	0.091	0.002	1.00511709713897e-05	ASDC	HELLPAR
4.4502633871123e-10	2.91777	0.545	0.07	1.04785901712946e-05	ASDC	RNASE6
4.51206396281127e-10	2.34842	0.364	0.031	1.06241058068354e-05	ASDC	EVI5
6.06210654316087e-10	2.92133	0.364	0.032	1.42738360665266e-05	ASDC	CRYBG3
6.08086679933174e-10	2.45619	0.273	0.018	1.43180089657065e-05	ASDC	NCAM1
6.1485794268958e-10	2.27753	0.364	0.031	1.44774451185689e-05	ASDC	ITGAX
6.26285281582044e-10	3.6966	0.182	0.009	1.47465132401308e-05	ASDC	LINC01376
6.27104419017348e-10	2.83726	0.455	0.049	1.47658006501825e-05	ASDC	FADS1
6.69070655673909e-10	3.55462	0.455	0.049	1.57539376584979e-05	ASDC	SPATS2L
6.96629231299301e-10	3.575	0.182	0.009	1.64028318801733e-05	ASDC	GGH
7.21881557480101e-10	2.28574	0.909	0.188	1.69974231524265e-05	ASDC	FCER1G
7.75849654889434e-10	2.68096	0.909	0.23	1.82681559740266e-05	ASDC	HLA-DRB5
8.02540278361524e-10	5.34157	0.091	0.002	1.88966133943004e-05	ASDC	XACT
8.18346360702158e-10	3.8347	0.182	0.009	1.9268783409093e-05	ASDC	DERL3
8.5225078717106e-10	0.346222	0.455	0.049	2.00670970347298e-05	ASDC	IGKC
8.58639639717518e-10	2.86076	0.273	0.019	2.02175289567887e-05	ASDC	MYO15B
8.61484268981432e-10	2.41887	0.545	0.066	2.02845085974368e-05	ASDC	DDX41
9.46186072325634e-10	2.72751	0.636	0.091	2.22788972589794e-05	ASDC	QKI
9.63837238579807e-10	2.15778	0.636	0.09	2.26945116196001e-05	ASDC	DBNDD2
9.669670234534e-10	6.1587	0.091	0.002	2.27682055342338e-05	ASDC	INCA1
1.0114866222529e-09	2.72375	0.364	0.032	2.38164640075667e-05	ASDC	PLBD2
1.05727914349744e-09	3.17022	0.727	0.137	2.48946947127906e-05	ASDC	IRF7
1.07338544437757e-09	3.07383	0.182	0.009	2.52739336733142e-05	ASDC	GRIP1
1.09683961946535e-09	3.91053	0.182	0.009	2.58261856799311e-05	ASDC	PHLDA3
1.25682314855078e-09	4.90625	0.091	0.002	2.95931578557768e-05	ASDC	SH3BGR
1.33547136933124e-09	1.93851	0.818	0.144	3.14450088622735e-05	ASDC	PLEK
1.3414131451447e-09	3.8056	0.182	0.009	3.15849139155771e-05	ASDC	LINC01006
1.35898064769813e-09	4.42142	0.091	0.002	3.19985583307002e-05	ASDC	PTPRS
1.59543115911685e-09	4.73729	0.091	0.002	3.75660220725653e-05	ASDC	STOX1
1.63726430782995e-09	4.26799	0.273	0.02	3.85510253921641e-05	ASDC	ADAM9
1.6466081311091e-09	2.55892	1	0.302	3.87710350550949e-05	ASDC	HLA-DRA
1.80708745940246e-09	2.58391	0.455	0.05	4.25496813190903e-05	ASDC	PLXNC1
1.85933079126351e-09	5.32975	0.091	0.002	4.37798028110905e-05	ASDC	ZNF285
1.93467045595423e-09	2.46129	0.364	0.033	4.55537505558983e-05	ASDC	GNB4
2.01350393716783e-09	2.70812	0.818	0.148	4.74099637045537e-05	ASDC	FCHSD2
2.09876224504776e-09	2.30327	0.364	0.033	4.94174558218946e-05	ASDC	SPECC1
2.44357313426774e-09	3.5794	0.182	0.009	5.75363730194681e-05	ASDC	AL096865.1
2.51826803414913e-09	2.02258	1	0.234	5.92951391320753e-05	ASDC	TYROBP
2.71063585263451e-09	4.59268	0.091	0.002	6.38246317861321e-05	ASDC	NHS
2.71415660676898e-09	2.60059	0.727	0.135	6.39075314629824e-05	ASDC	C20orf27
2.94534289304068e-09	4.3951	0.091	0.002	6.93510437595359e-05	ASDC	SMOX
2.9483593894654e-09	5.90443	0.091	0.002	6.94220701843524e-05	ASDC	KDELR3
3.02911280398774e-09	3.51936	0.455	0.052	7.13234900826953e-05	ASDC	ZDHHC17
3.1190608808514e-09	1.92078	0.545	0.07	7.34414075005272e-05	ASDC	TGFBI
3.30141129876804e-09	4.505	0.091	0.002	7.77350304407923e-05	ASDC	LINC00900
3.67716395274917e-09	5.70077	0.091	0.002	8.65825024314319e-05	ASDC	AC009495.1
3.95265746038888e-09	2.6884	0.273	0.02	9.30692725623166e-05	ASDC	GALNT3
4.25768458909663e-09	2.71655	0.727	0.123	0.000100251	ASDC	ERCC1
4.43419717785534e-09	3.06523	0.182	0.009	0.000104408	ASDC	HDX
4.63354908093831e-09	4.6545	0.091	0.002	0.000109102	ASDC	AC005332.1
4.83768999536138e-09	6.04118	0.091	0.003	0.000113908	ASDC	AP003469.4
5.10545467868793e-09	3.25119	0.909	0.258	0.000120213	ASDC	C12orf75
5.21875327146707e-09	2.54654	0.455	0.053	0.000122881	ASDC	KCTD12
5.40186953131463e-09	2.5817	0.455	0.053	0.000127192	ASDC	SNRNP25
5.60414811133715e-09	2.91828	0.364	0.035	0.000131955	ASDC	ZNF296
5.74856172172515e-09	2.98714	0.273	0.021	0.000135356	ASDC	PHLPP1
5.79902576301757e-09	2.3196	0.364	0.035	0.000136544	ASDC	MS4A4A
5.85898935772808e-09	5.70432	0.182	0.01	0.000137956	ASDC	BCL7A
6.17197745241879e-09	4.57018	0.091	0.003	0.000145325	ASDC	RANBP17
6.18089497721533e-09	2.56908	0.273	0.021	0.000145535	ASDC	CTTNBP2NL
6.3344121483752e-09	3.28471	0.545	0.08	0.00014915	ASDC	RPS6KA4
7.34366591835248e-09	3.2969	0.273	0.021	0.000172914	ASDC	PLAGL1
7.38848407324394e-09	3.03851	0.273	0.021	0.000173969	ASDC	SLC1A4
7.66635846614322e-09	5.23118	0.091	0.003	0.000180512	ASDC	CRIP3
7.88365277299684e-09	2.58482	0.273	0.021	0.000185628	ASDC	UCK2
7.93006735878564e-09	2.54182	0.364	0.035	0.000186721	ASDC	TMEM97
8.65737107805705e-09	5.9556	0.091	0.003	0.000203846	ASDC	LINC00852
8.82476285352738e-09	4.2809	0.182	0.01	0.000207788	ASDC	PROCR
9.51223673859892e-09	5.91424	0.091	0.003	0.000223975	ASDC	U91328.1
1.0097177324891e-08	2.47359	1	0.446	0.000237748	ASDC	SAMHD1
1.03826802192744e-08	3.57534	0.182	0.01	0.000244471	ASDC	ANK1
1.07171112059908e-08	4.31494	0.091	0.003	0.000252345	ASDC	AP000547.3
1.12633235534488e-08	2.13219	0.545	0.074	0.000265206	ASDC	C12orf45
1.21198666142093e-08	3.53264	0.182	0.01	0.000285374	ASDC	ACPP
1.28324406190019e-08	2.94019	0.182	0.01	0.000302153	ASDC	PRKAR2B
1.29971447372887e-08	5.25592	0.182	0.01	0.000306031	ASDC	CAPN3
1.37591660753888e-08	5.66736	0.091	0.003	0.000323973	ASDC	AC005532.1
1.4577215563849e-08	2.42883	1	0.351	0.000343235	ASDC	HLA-DRB1
1.50003699409975e-08	2.43201	0.273	0.022	0.000353199	ASDC	RTN1
1.65783915975719e-08	5.49957	0.091	0.003	0.000390355	ASDC	AC007038.2
1.68508850177432e-08	2.52772	0.182	0.01	0.000396771	ASDC	IL1B
1.68615452265954e-08	2.80034	0.455	0.056	0.000397022	ASDC	CYSTM1
1.79373083562755e-08	3.59547	0.182	0.01	0.000422352	ASDC	C5orf58
2.20489772215097e-08	3.96824	0.182	0.01	0.000519165	ASDC	CCDC15
2.24048205044098e-08	2.0437	0.727	0.135	0.000527544	ASDC	IL6R
2.29929963054457e-08	5.74713	0.091	0.003	0.000541393	ASDC	AMPH
2.50644030587711e-08	5.41756	0.091	0.003	0.000590166	ASDC	HIST1H2BB
2.54277513668942e-08	2.57555	0.455	0.058	0.000598722	ASDC	COX10-AS1
2.57218916404618e-08	2.9208	0.364	0.038	0.000605648	ASDC	ZBTB33
2.61377527235469e-08	2.28488	0.727	0.136	0.00061544	ASDC	SPINT2
2.68882049807009e-08	5.11396	0.091	0.003	0.00063311	ASDC	AC092803.1
2.76343269786985e-08	3.7838	0.182	0.01	0.000650678	ASDC	ASPHD2
2.88405089594259e-08	4.20304	0.091	0.003	0.000679079	ASDC	PROS1
3.00413439498362e-08	1.93703	0.455	0.055	0.000707353	ASDC	OSBPL11
3.1226422720921e-08	3.02085	0.545	0.086	0.000735257	ASDC	SFMBT2
3.21598920916604e-08	5.01259	0.091	0.003	0.000757237	ASDC	AC008462.1
3.44113349383326e-08	2.30162	0.636	0.104	0.000810249	ASDC	CD302
3.48617452850027e-08	1.92773	0.455	0.057	0.000820855	ASDC	HAMP
3.79438776456605e-08	2.88078	0.273	0.023	0.000893427	ASDC	RELT
3.9977337698254e-08	4.46098	0.091	0.003	0.000941306	ASDC	AC009506.1
4.2840016239422e-08	4.86464	0.091	0.003	0.00100871	ASDC	ANKRD50
4.28854394772183e-08	4.15622	0.182	0.011	0.00100978	ASDC	GPR160
4.39470677730763e-08	3.22	0.273	0.023	0.00103478	ASDC	TEX2
4.45945722337646e-08	3.13744	0.091	0.003	0.00105002	ASDC	IGHV4-34
4.63885009300673e-08	3.16751	0.182	0.011	0.00109226	ASDC	KMO
4.64569459596095e-08	4.39462	0.091	0.003	0.00109388	ASDC	NDST1
4.7125199683302e-08	3.60885	0.182	0.011	0.00110961	ASDC	RNF213-AS1
5.04204632272013e-08	4.53806	0.091	0.003	0.0011872	ASDC	GNRH1
5.09731176977078e-08	2.58526	1	0.421	0.00120021	ASDC	HLA-DPA1
5.33442635813333e-08	4.12801	0.091	0.003	0.00125604	ASDC	NT5DC2
5.76957816559192e-08	2.9179	0.364	0.04	0.0013585	ASDC	NBPF10
5.93845949312775e-08	3.1972	0.182	0.011	0.00139827	ASDC	SLC25A30
5.95737007164789e-08	1.95244	0.364	0.039	0.00140272	ASDC	LPCAT2
6.29529626028056e-08	5.81279	0.091	0.003	0.00148229	ASDC	AC092296.2
6.46432551758209e-08	3.1845	0.273	0.024	0.00152209	ASDC	DUSP3
6.72964804718628e-08	3.01768	0.182	0.011	0.00158456	ASDC	AL360091.3
6.80951391470902e-08	3.21338	0.364	0.04	0.00160337	ASDC	ZMIZ2
7.18613064614691e-08	2.71306	0.818	0.227	0.00169205	ASDC	HLA-DQB1
8.07539618226036e-08	1.80505	0.818	0.176	0.00190143	ASDC	COMT
8.51687409915032e-08	4.26116	0.091	0.003	0.00200538	ASDC	HOXB3
8.75403700317793e-08	4.60452	0.091	0.003	0.00206123	ASDC	AC018462.1
8.82097755336159e-08	1.79576	0.455	0.057	0.00207699	ASDC	CTNNBIP1
9.38493853802898e-08	4.59322	0.091	0.003	0.00220978	ASDC	POU5F2
1.02018660776643e-07	1.7432	0.364	0.04	0.00240213	ASDC	MAML3
1.02994759611301e-07	5.2221	0.182	0.011	0.00242511	ASDC	PACSIN1
1.03221919625749e-07	4.14006	0.091	0.003	0.00243046	ASDC	ANPEP
1.19149618907937e-07	5.01606	0.091	0.003	0.0028055	ASDC	AC104530.1
1.26489665868546e-07	2.4602	0.455	0.061	0.00297833	ASDC	DTX2
1.28872100309006e-07	4.40575	0.091	0.003	0.00303442	ASDC	AL139021.1
1.29172658203839e-07	2.9489	0.182	0.011	0.0030415	ASDC	CLNK
1.32556571178623e-07	1.55195	0.455	0.058	0.00312118	ASDC	STK38L
1.33649294804367e-07	6.46786	0.091	0.003	0.00314691	ASDC	LCNL1
1.37403173578932e-07	2.06598	1	0.462	0.0032353	ASDC	GSTP1
1.3987139136531e-07	1.79539	0.818	0.179	0.00329341	ASDC	USF2
1.47913482993935e-07	4.55941	0.091	0.003	0.00348277	ASDC	ARHGEF10
1.69769906443337e-07	4.40529	0.091	0.003	0.0039974	ASDC	AL158163.2
1.70859718405508e-07	3.87505	0.182	0.012	0.00402306	ASDC	TLR7
1.80789308603044e-07	4.30148	0.091	0.003	0.00425687	ASDC	ARHGEF38
1.9357870793049e-07	3.64452	0.182	0.012	0.004558	ASDC	TBC1D12
1.96522599489532e-07	2.10781	0.545	0.086	0.00462732	ASDC	UNC119
2.04692374489386e-07	4.52261	0.091	0.003	0.00481969	ASDC	NUMBL
2.06382656395274e-07	4.04095	0.091	0.003	0.00485949	ASDC	VNN1
2.26251722895377e-07	4.45163	0.364	0.043	0.00532732	ASDC	HMGA1P4
2.33256486905818e-07	4.13419	0.091	0.003	0.00549226	ASDC	LINC01176
2.36995847569446e-07	1.38221	0.636	0.109	0.0055803	ASDC	SKAP2
2.57384450003805e-07	2.31412	0.364	0.043	0.00606037	ASDC	NAIP
2.80759077391519e-07	4.1878	0.091	0.003	0.00661075	ASDC	CD22
2.84224072125978e-07	4.21264	0.091	0.003	0.00669234	ASDC	HIST2H2AA4
2.90413646279573e-07	2.33301	0.364	0.043	0.00683808	ASDC	PIK3AP1
2.97073721645672e-07	1.68481	0.727	0.143	0.0069949	ASDC	TPP1
2.98162974951189e-07	5.39347	0.091	0.003	0.00702055	ASDC	MEF2C-AS2
3.0628661494741e-07	2.57751	1	0.761	0.00721182	ASDC	CD74
3.12255170107172e-07	3.93396	0.091	0.003	0.00735236	ASDC	GAS2L3
3.16800490118856e-07	4.29455	0.091	0.003	0.00745938	ASDC	FOXRED2
3.18344702072106e-07	2.77398	0.182	0.012	0.00749574	ASDC	LILRA5
3.21409657065468e-07	4.32615	0.091	0.003	0.00756791	ASDC	AC005523.2
3.50453000616685e-07	1.94571	0.455	0.063	0.00825177	ASDC	RNF141
3.77174657828809e-07	1.54853	0.455	0.063	0.00888095	ASDC	MNDA
3.77898852002964e-07	4.0204	0.091	0.003	0.00889801	ASDC	SEZ6L
3.85348527960332e-07	4.17207	0.091	0.003	0.00907342	ASDC	OMG
3.90556612665257e-07	2.04068	0.636	0.123	0.00919605	ASDC	PLEKHO1
3.95547754878943e-07	2.03685	0.455	0.066	0.00931357	ASDC	SYK
3.99421228712185e-07	3.02331	0.273	0.026	0.00940477	ASDC	FNIP2
4.02904224808039e-07	3.08042	0.182	0.012	0.00948678	ASDC	AKR1E2
4.03728277780987e-07	2.56994	0.455	0.068	0.00950619	ASDC	PXK
4.15344298950647e-07	5.69245	0.091	0.003	0.0097797	ASDC	LHFPL3
4.17198672922088e-07	5.46491	0.091	0.003	0.00982336	ASDC	U91328.2
4.25589729866257e-07	2.79557	0.273	0.026	0.0100209	ASDC	RHOQ
4.37357908886949e-07	4.81858	0.091	0.003	0.010298	ASDC	MST1
4.44405809494977e-07	5.41667	0.091	0.003	0.010464	ASDC	DEPDC4
4.48535559792794e-07	3.79503	0.182	0.012	0.0105612	ASDC	OSBPL5
4.59333313294305e-07	3.34126	0.182	0.012	0.0108155	ASDC	SECTM1
4.94199740816236e-07	2.53818	0.273	0.026	0.0116364	ASDC	ZNF710
5.20492654741756e-07	3.74014	0.182	0.013	0.0122555	ASDC	CATSPER2
5.40781316596577e-07	2.87705	0.273	0.027	0.0127332	ASDC	LILRB2
5.44310760873535e-07	2.38706	0.182	0.012	0.0128163	ASDC	GASK1B
5.60078956485472e-07	1.77618	0.636	0.122	0.0131876	ASDC	GLUL
5.65192630457415e-07	4.29209	0.091	0.003	0.013308	ASDC	IGF2BP2
6.0839815405007e-07	2.03106	0.273	0.026	0.0143253	ASDC	CLEC12A
6.2591033138948e-07	3.37739	0.273	0.028	0.0147377	ASDC	METRNL
6.27022993082694e-07	3.9494	0.091	0.003	0.0147639	ASDC	RASSF8
6.29127421963984e-07	3.16394	0.273	0.028	0.0148134	ASDC	DST
6.31123708820409e-07	3.55162	0.091	0.003	0.0148604	ASDC	LINC01664
6.33180745430061e-07	2.43274	0.818	0.225	0.0149089	ASDC	STXBP2
6.76083796809509e-07	4.07096	0.273	0.027	0.0159191	ASDC	ZNF467
7.16078769552266e-07	2.0729	0.455	0.066	0.0168608	ASDC	TOLLIP
7.2028379970345e-07	2.73731	0.273	0.027	0.0169598	ASDC	SLC29A3
7.26271427518304e-07	4.20998	0.182	0.013	0.0171008	ASDC	AREG
7.47914798802858e-07	2.69279	0.273	0.027	0.0176104	ASDC	GLCE
7.611422329175e-07	2.3121	0.364	0.046	0.0179219	ASDC	CDYL
7.66229513445683e-07	2.36848	0.545	0.095	0.0180416	ASDC	UGCG
7.87177762446942e-07	5.18959	0.091	0.003	0.0185349	ASDC	AMOTL1
8.33115326198336e-07	3.62535	0.182	0.013	0.0196165	ASDC	INSYN2B
9.08001108638711e-07	2.03561	0.273	0.027	0.0213798	ASDC	HIST1H2BK
9.26483203585903e-07	2.28849	0.364	0.045	0.021815	ASDC	FDX2
9.55177413251381e-07	1.78008	0.727	0.161	0.0224906	ASDC	SFT2D1
9.57572989025107e-07	3.09976	0.182	0.013	0.022547	ASDC	ZNF449
9.81352724625279e-07	4.19096	0.091	0.003	0.0231069	ASDC	AL512353.1
9.92052863081228e-07	2.90608	0.273	0.028	0.0233589	ASDC	IRF4
1.03520418305423e-06	1.90453	0.545	0.091	0.0243749	ASDC	SPPL3
1.04983350609987e-06	5.20573	0.091	0.004	0.0247194	ASDC	LINC01320
1.05700231962771e-06	3.54878	0.364	0.049	0.0248882	ASDC	FBXW4
1.07581246556313e-06	2.08498	0.545	0.096	0.0253311	ASDC	ATL3
1.15692241498509e-06	2.58018	0.273	0.028	0.0272409	ASDC	FAM43A
1.16211659323624e-06	2.37629	0.273	0.027	0.0273632	ASDC	CASS4
1.17876510109659e-06	4.63643	0.091	0.004	0.0277552	ASDC	ATL1
1.19285104403599e-06	3.45013	0.182	0.013	0.0280869	ASDC	C2orf81
1.2141400311856e-06	2.80808	0.273	0.028	0.0285881	ASDC	UBFD1
1.23735153473274e-06	2.73365	0.182	0.013	0.0291347	ASDC	CD180
1.26799716800951e-06	1.55778	0.455	0.069	0.0298563	ASDC	IL18
1.27478377638815e-06	2.81055	0.182	0.013	0.0300161	ASDC	LRRC69
1.34180497418507e-06	3.44606	0.091	0.004	0.0315941	ASDC	PIGR
1.34646807487073e-06	1.96852	0.455	0.069	0.0317039	ASDC	NUDT16
1.35061576359753e-06	1.91393	0.455	0.068	0.0318016	ASDC	PNPLA6
1.35382749648777e-06	3.91151	0.182	0.014	0.0318772	ASDC	GRASP
1.41669131440437e-06	1.5247	1	0.415	0.0333574	ASDC	PSAP
1.57003757511455e-06	3.78801	0.364	0.049	0.0369681	ASDC	MED25
1.5994630732204e-06	2.47148	0.273	0.028	0.037661	ASDC	AC009313.1
1.65821683211221e-06	4.38144	0.091	0.004	0.0390444	ASDC	CCR3
1.67771412305642e-06	0.860445	0.364	0.046	0.0395035	ASDC	CPVL
1.67780075718013e-06	2.4999	0.455	0.074	0.0395055	ASDC	TYK2
1.81810847609165e-06	2.98616	0.273	0.029	0.0428092	ASDC	SPPL2B
1.85536864245891e-06	1.59248	0.909	0.314	0.0436865	ASDC	PYCARD
1.86202950448664e-06	3.62017	0.182	0.014	0.0438433	ASDC	RGS16
1.91906123424697e-06	3.71263	0.091	0.004	0.0451862	ASDC	ATF3
1.94401859679199e-06	1.44587	0.727	0.154	0.0457739	ASDC	ARF3
2.0521340957612e-06	1.86309	0.455	0.072	0.0483195	ASDC	PAK1
2.15203194818552e-06	1.59606	1	0.682	0.0506717	ASDC	LSP1
2.15268348157581e-06	1.44749	0.727	0.154	0.0506871	ASDC	PTRHD1
2.162321575655e-06	2.31122	0.636	0.126	0.050914	ASDC	ZNF652
2.27139872221177e-06	2.75517	0.364	0.05	0.0534824	ASDC	KCNK6
2.35322520199821e-06	3.86275	0.091	0.004	0.055409	ASDC	RTKN
2.59775968254978e-06	1.81245	0.727	0.187	0.0611668	ASDC	C1orf162
2.78432017753936e-06	1.9752	0.909	0.369	0.0655596	ASDC	FAM49B
2.82890112503348e-06	2.62631	0.182	0.014	0.0666093	ASDC	BCAR3
3.00808404982223e-06	2.56356	0.182	0.014	0.0708283	ASDC	A2M-AS1
3.05738039454775e-06	1.96592	0.273	0.029	0.0719891	ASDC	TM6SF1
3.06260378577952e-06	2.61679	0.273	0.03	0.0721121	ASDC	ADGRG5
3.19499705367265e-06	2.28747	0.364	0.05	0.0752294	ASDC	NRIP1
3.34433535584297e-06	1.84156	0.545	0.102	0.0787457	ASDC	NME1
3.61702565009258e-06	4.29155	0.091	0.004	0.0851665	ASDC	EMP1
3.78463446140966e-06	1.6967	1	0.785	0.089113	ASDC	S100A6
3.83993517084001e-06	2.0581	0.455	0.075	0.0904151	ASDC	PLIN3
3.89635556247772e-06	2.6712	0.182	0.014	0.0917436	ASDC	NAV1
4.20972636429493e-06	2.03891	0.455	0.074	0.0991222	ASDC	DNTTIP1
4.33745688157482e-06	2.26994	0.273	0.03	0.10213	ASDC	FBXL6
4.36984841189004e-06	3.3078	0.182	0.015	0.102892	ASDC	CMTM1
4.45266360584786e-06	2.07664	0.909	0.282	0.104842	ASDC	HERPUD1
4.88395385080838e-06	2.31546	0.909	0.422	0.114998	ASDC	HLA-DPB1
5.0328759553653e-06	2.38761	0.182	0.015	0.118504	ASDC	LMO2
5.20597649181938e-06	3.97554	0.091	0.004	0.12258	ASDC	U62317.4
5.24725012463169e-06	1.26036	0.455	0.072	0.123552	ASDC	GCA
5.31977002293596e-06	1.95295	0.636	0.138	0.125259	ASDC	CYP51A1
5.566426192885e-06	4.07989	0.091	0.004	0.131067	ASDC	SRC
6.1653260522379e-06	3.01625	0.182	0.015	0.145169	ASDC	HIST4H4
6.30457101972255e-06	2.31319	0.273	0.031	0.148447	ASDC	ABITRAM
6.32273981956041e-06	2.50204	0.364	0.054	0.148875	ASDC	SLC12A9
6.45619301747096e-06	2.91684	0.182	0.015	0.152018	ASDC	KIAA1958
6.49550223699627e-06	5.65368	0.091	0.004	0.152943	ASDC	AC099489.1
6.65162193488696e-06	2.62611	0.273	0.032	0.156619	ASDC	ZNF789
6.96628586211203e-06	0.498691	0.545	0.103	0.164028	ASDC	LYZ
7.01014472320501e-06	3.63944	0.091	0.004	0.165061	ASDC	KAZN
7.07984626322605e-06	3.65221	0.182	0.015	0.166702	ASDC	ZNF446
7.09012811132838e-06	2.65976	0.364	0.054	0.166944	ASDC	SLAMF7
7.21778559486081e-06	2.03873	0.818	0.217	0.16995	ASDC	CLTB
7.33951178250701e-06	1.47397	0.909	0.328	0.172816	ASDC	GNAI2
7.39828082004978e-06	3.05413	0.455	0.08	0.1742	ASDC	MAN1B1
7.6729474453052e-06	1.6902	0.636	0.135	0.180667	ASDC	BOLA3
7.96760216875313e-06	2.50343	0.182	0.015	0.187605	ASDC	CHKA
8.02731720925327e-06	2.52683	0.182	0.015	0.189011	ASDC	HLA-DQB2
8.10673157488575e-06	1.7712	0.455	0.077	0.190881	ASDC	NANS
8.30957297524958e-06	1.51817	0.455	0.076	0.195657	ASDC	FABP5
8.94484545370345e-06	2.06796	0.273	0.031	0.210615	ASDC	ALYREF
9.10953566819421e-06	3.00665	0.182	0.015	0.214493	ASDC	CDCA7L
9.18026187490343e-06	3.86811	0.091	0.004	0.216158	ASDC	AC006942.1
9.21592113825926e-06	1.86733	0.364	0.054	0.216998	ASDC	SRGAP2
9.44313515118838e-06	2.10743	0.273	0.031	0.222348	ASDC	MICA
9.52126862967663e-06	3.82219	0.091	0.004	0.224188	ASDC	SLC49A3
9.52682753068684e-06	3.6894	0.091	0.004	0.224319	ASDC	OR3A2
9.52892706845626e-06	2.12178	0.273	0.032	0.224368	ASDC	MAPK9
9.64519558863739e-06	2.2305	0.273	0.032	0.227106	ASDC	ZNF236-DT
9.67367660984365e-06	3.75604	0.182	0.016	0.227776	ASDC	CENPBD1
9.7317875688565e-06	1.68677	0.545	0.104	0.229145	ASDC	EXOSC5
9.80398345423898e-06	3.1329	0.091	0.004	0.230845	ASDC	HIST1H2AI
1.00012920510404e-05	2.74175	0.182	0.016	0.23549	ASDC	FTCDNL1
1.01680347173407e-05	2.23711	0.455	0.078	0.239417	ASDC	IVD
1.12830970220314e-05	3.84652	0.091	0.004	0.265672	ASDC	DPH6-DT
1.13482497878393e-05	2.66497	0.182	0.016	0.267206	ASDC	ZNF616
1.13546349514811e-05	3.83442	0.091	0.004	0.267356	ASDC	DDTL
1.14007623978841e-05	1.65895	0.273	0.032	0.268442	ASDC	BTK
1.19900460257902e-05	1.98363	0.455	0.081	0.282318	ASDC	TBXAS1
1.20772430974821e-05	5.23553	0.091	0.004	0.284371	ASDC	ARRDC4
1.21459078998472e-05	1.96236	0.273	0.033	0.285988	ASDC	FGD4
1.23503794591377e-05	2.4695	0.182	0.016	0.290802	ASDC	TRPM2
1.26698085783656e-05	4.77246	0.091	0.004	0.298323	ASDC	HULC
1.27716619576937e-05	2.78985	0.182	0.016	0.300722	ASDC	RIMKLB
1.32489360160579e-05	0.48225	0.818	0.196	0.311959	ASDC	AIF1
1.32745781465146e-05	2.13235	0.455	0.08	0.312563	ASDC	FAR1
1.33127450501716e-05	4.12884	0.091	0.004	0.313462	ASDC	ANKRD33B
1.33830877007601e-05	2.51311	0.182	0.016	0.315118	ASDC	BRCA2
1.35207143600684e-05	2.42873	0.273	0.034	0.318359	ASDC	KIAA0930
1.36114624896734e-05	3.61715	0.091	0.004	0.320495	ASDC	ADGRB3
1.36780088882325e-05	2.76065	0.182	0.016	0.322062	ASDC	RAB40B
1.39704501468262e-05	1.42954	1	0.783	0.328948	ASDC	CYBA
1.43997371699819e-05	4.32882	0.091	0.004	0.339056	ASDC	AF001548.2
1.44051457253794e-05	1.55523	0.455	0.079	0.339184	ASDC	TET2
1.50727953456961e-05	2.773	0.273	0.034	0.354904	ASDC	WDR81
1.54396199785529e-05	2.0468	0.273	0.033	0.363541	ASDC	FAHD1
1.57843672409135e-05	4.11414	0.091	0.004	0.371659	ASDC	C5
1.57940579839909e-05	1.22899	0.636	0.146	0.371887	ASDC	ETV6
1.59600625456488e-05	1.3797	0.818	0.236	0.375796	ASDC	TMEM14C
1.63699481097898e-05	2.11281	0.273	0.034	0.385447	ASDC	RAB34
1.66743252403631e-05	3.40782	0.182	0.016	0.392614	ASDC	CDK2
1.72092404304716e-05	3.58451	0.182	0.016	0.405209	ASDC	NAGLU
1.7494120320006e-05	4.54436	0.182	0.017	0.411917	ASDC	MZB1
1.80330078558946e-05	2.11288	0.364	0.057	0.424605	ASDC	SH2B3
1.82019514616643e-05	2.11128	0.273	0.033	0.428583	ASDC	PUSL1
1.83689937679911e-05	2.4094	0.545	0.13	0.432516	ASDC	YIF1A
1.8881386685937e-05	3.83615	0.091	0.004	0.444581	ASDC	AC008610.1
1.9296227519536e-05	1.68563	0.455	0.08	0.454349	ASDC	RNFT1
1.94119396213992e-05	3.76871	0.091	0.004	0.457074	ASDC	ORC6
1.94206897494621e-05	1.53014	0.545	0.107	0.45728	ASDC	TP53I13
1.94650745731289e-05	3.46557	0.091	0.004	0.458325	ASDC	REPS2
2.04606204896563e-05	1.80402	0.455	0.082	0.481766	ASDC	CCDC32
2.06565934806207e-05	4.41388	0.091	0.005	0.48638	ASDC	VDR
2.07786649169294e-05	1.67227	0.727	0.198	0.489254	ASDC	GNB1
2.0793589400677e-05	2.1999	0.273	0.034	0.489606	ASDC	CDK5
2.08688798308968e-05	4.18247	0.182	0.017	0.491379	ASDC	ACSF2
2.10160775460084e-05	3.04857	0.364	0.057	0.494845	ASDC	MBNL3
2.18970754764323e-05	2.2179	0.455	0.084	0.515589	ASDC	SNUPN
2.2042072139686e-05	3.9576	0.091	0.005	0.519003	ASDC	AL606489.1
2.29545616119005e-05	5.00996	0.091	0.005	0.540488	ASDC	MBOAT2
2.42591293112309e-05	-7.87539	0	0.727	0.571205	ASDC	IL32
2.42761904788777e-05	1.46303	0.545	0.117	0.571607	ASDC	PTMS
2.48181543681763e-05	2.76418	0.273	0.036	0.584368	ASDC	AL034397.3
2.5035514981265e-05	3.66615	0.091	0.005	0.589486	ASDC	ZNF710-AS1
2.51881716984006e-05	2.38411	0.273	0.035	0.593081	ASDC	RNF135
2.53878827832114e-05	4.27596	0.091	0.005	0.597783	ASDC	PINK1-AS
2.55499433237123e-05	4.26168	0.091	0.005	0.601599	ASDC	AL138756.1
2.56649681129114e-05	2.65905	0.182	0.017	0.604307	ASDC	AL022328.4
2.59996699456399e-05	3.45401	0.182	0.017	0.612188	ASDC	GCNT2
2.61408623148599e-05	3.99696	0.091	0.005	0.615513	ASDC	ICAM4
2.74966415520019e-05	1.93895	0.273	0.034	0.647436	ASDC	FAM118B
2.78641249598449e-05	3.34061	0.182	0.017	0.656089	ASDC	RASGEF1A
2.79258317437157e-05	1.32347	0.909	0.311	0.657542	ASDC	RNH1
2.79328302819258e-05	2.6159	0.273	0.035	0.657706	ASDC	G6PC3
2.89758984292046e-05	1.90724	0.545	0.121	0.682267	ASDC	TRIM8
2.89950471933418e-05	3.28401	0.091	0.005	0.682717	ASDC	MRAS
2.91096467469973e-05	2.09126	0.364	0.059	0.685416	ASDC	CARS2
3.09782034630814e-05	4.80951	0.091	0.005	0.729413	ASDC	DCBLD2
3.10628045144681e-05	2.49738	0.182	0.017	0.731405	ASDC	ZNF785
3.14299002082139e-05	-6.62884	0	0.716	0.740048	ASDC	CD3E
3.14408691432171e-05	3.78353	0.091	0.005	0.740307	ASDC	LINC01505
3.16390225208127e-05	3.89652	0.091	0.005	0.744972	ASDC	AC139795.2
3.20070237949083e-05	2.48561	0.182	0.017	0.753637	ASDC	TXNDC5
3.41692953356831e-05	5.04922	0.091	0.005	0.80455	ASDC	MIR302CHG
3.44200380571149e-05	2.57564	0.182	0.017	0.810454	ASDC	PLEKHG2
3.44798546316057e-05	2.723	0.273	0.036	0.811863	ASDC	SLC18B1
3.54105350918618e-05	2.61805	0.182	0.017	0.833776	ASDC	KLF16
3.56216397574731e-05	3.67724	0.091	0.005	0.838747	ASDC	LMCD1
3.58471698494384e-05	1.23691	0.727	0.174	0.844057	ASDC	MAP4K1
3.5956570744736e-05	1.80197	0.364	0.057	0.846633	ASDC	CFAP20
3.63501911558628e-05	1.84151	0.273	0.035	0.855902	ASDC	SMCO4
3.65483074072008e-05	4.43963	0.182	0.018	0.860566	ASDC	GOLIM4
3.71265728404766e-05	4.46349	0.091	0.005	0.874182	ASDC	CRIPAK
3.96864247826455e-05	3.78492	0.091	0.005	0.934457	ASDC	BAIAP2L1
3.96953544617843e-05	1.65688	0.364	0.057	0.934667	ASDC	POC5
4.06390791612562e-05	4.12867	0.273	0.037	0.956888	ASDC	GNG7
4.3709901487258e-05	2.63155	0.455	0.096	1	ASDC	SEL1L3
4.44993890183982e-05	3.71796	0.273	0.038	1	ASDC	TFRC
4.54448625193061e-05	3.90756	0.091	0.005	1	ASDC	AC093227.1
4.5558693324124e-05	1.79816	0.182	0.017	1	ASDC	RIN2
4.69812178781417e-05	2.43209	0.364	0.062	1	ASDC	HIP1
4.70461822494395e-05	3.37837	0.091	0.005	1	ASDC	AL359643.3
4.7050296014022e-05	2.5321	0.545	0.13	1	ASDC	WDR61
4.70621895676237e-05	1.76856	0.455	0.087	1	ASDC	COPS7A
4.78417340320656e-05	4.39817	0.091	0.005	1	ASDC	PHEX
4.80805303932861e-05	2.50245	0.273	0.038	1	ASDC	MTMR10
4.84648760373669e-05	1.05742	1	0.814	1	ASDC	RPS11
5.01768355455382e-05	2.47199	0.273	0.037	1	ASDC	GM2A
5.06018159930595e-05	1.83534	0.364	0.061	1	ASDC	STX18
5.1976055721643e-05	2.07853	0.273	0.036	1	ASDC	PRADC1
5.2121271312344e-05	2.67995	0.273	0.037	1	ASDC	JMJD4
5.46054727793327e-05	2.162	0.364	0.065	1	ASDC	VAV3
5.79035357469306e-05	3.71677	0.091	0.005	1	ASDC	AC011346.1
5.80405667991824e-05	1.82585	0.455	0.089	1	ASDC	SPNS1
5.82064935082484e-05	4.89796	0.091	0.005	1	ASDC	AL359258.2
5.97533542979982e-05	-5.4636	0.182	0.74	1	ASDC	CD52
6.28180522615867e-05	3.26805	0.091	0.005	1	ASDC	CDCA8
6.34577229474565e-05	1.32704	0.636	0.157	1	ASDC	ATP1B3
6.43413823866712e-05	3.28401	0.091	0.005	1	ASDC	ZEB2-AS1
6.76445122483618e-05	2.68128	0.182	0.018	1	ASDC	ZNF813
6.80393080987426e-05	1.94453	0.273	0.037	1	ASDC	ADCK2
6.86081614774717e-05	2.48963	0.182	0.018	1	ASDC	HHEX
6.98025190787675e-05	2.46904	0.182	0.018	1	ASDC	LTB4R
6.9914609011628e-05	2.6548	0.182	0.018	1	ASDC	ZSCAN9
7.01170733593575e-05	3.6959	0.091	0.005	1	ASDC	FAAH
7.08952920373302e-05	3.88575	0.091	0.005	1	ASDC	TVP23A
7.09493395422977e-05	2.66429	0.273	0.039	1	ASDC	SLC27A3
7.50381158575177e-05	1.27025	0.545	0.117	1	ASDC	SLC20A1
7.64463451705847e-05	3.7407	0.091	0.005	1	ASDC	GCAT
7.8231502196565e-05	2.5729	0.182	0.019	1	ASDC	OSCAR
7.8259934430367e-05	2.27338	0.182	0.018	1	ASDC	FAH
7.83240365641207e-05	2.17965	0.273	0.038	1	ASDC	TRAK1
8.04025630184053e-05	1.15491	1	0.755	1	ASDC	ARPC1B
8.33508277997226e-05	3.80088	0.091	0.005	1	ASDC	TTC21A
8.49293345523425e-05	1.83109	0.818	0.391	1	ASDC	ALOX5AP
8.58057412765356e-05	1.2824	0.909	0.445	1	ASDC	DRAP1
8.65411850638624e-05	3.34297	0.091	0.005	1	ASDC	AC138649.1
8.66477247243623e-05	1.31762	0.818	0.265	1	ASDC	CTSB
8.67802119921163e-05	1.65699	0.545	0.128	1	ASDC	RAB24
8.73036562730743e-05	3.76837	0.091	0.005	1	ASDC	C9orf139
8.80121702264114e-05	1.20168	0.364	0.063	1	ASDC	PLXDC2
9.31631417588812e-05	2.96016	0.364	0.064	1	ASDC	STX6
9.39154912983804e-05	1.22684	0.727	0.19	1	ASDC	EIF6
9.469458971639e-05	1.81883	0.727	0.204	1	ASDC	PARVG
9.68014077785248e-05	1.65098	0.545	0.128	1	ASDC	MYD88
9.68990257207658e-05	3.72656	0.091	0.005	1	ASDC	AC099778.1
9.74863550292659e-05	1.19535	0.818	0.236	1	ASDC	FDPS
9.75100413418783e-05	1.4014	0.545	0.124	1	ASDC	NUDT1
9.94356512911496e-05	1.59396	0.909	0.733	1	ASDC	S100A10
9.97110909744106e-05	1.51386	0.182	0.019	1	ASDC	DHRS9
0.000100548	1.37916	0.727	0.219	1	ASDC	RHOC
0.000101462	1.47524	0.364	0.063	1	ASDC	DOP1A
0.000104284	1.42434	0.364	0.062	1	ASDC	RFX5
0.00010575	2.56336	0.182	0.019	1	ASDC	NEK3
0.000106097	3.09087	0.364	0.065	1	ASDC	RMND5B
0.000107256	-1.13941	0.909	0.978	1	ASDC	B2M
0.000108333	3.61907	0.273	0.041	1	ASDC	CBWD1
0.000108395	2.03526	0.182	0.019	1	ASDC	CPED1
0.000110784	1.99141	0.364	0.065	1	ASDC	LAS1L
0.000114141	2.16804	0.273	0.04	1	ASDC	ATP11A
0.000116072	3.76517	0.182	0.02	1	ASDC	ZNF771
0.000118123	2.08519	0.455	0.103	1	ASDC	MIIP
0.000123101	2.14388	0.727	0.315	1	ASDC	SYNGR2
0.000123401	3.41985	0.091	0.005	1	ASDC	CYP2S1
0.000123441	2.45509	0.273	0.04	1	ASDC	SREBF1
0.000124694	3.15126	0.273	0.041	1	ASDC	SPOPL
0.000127115	3.59025	0.091	0.005	1	ASDC	ATP2A1-AS1
0.000127968	4.26632	0.091	0.005	1	ASDC	BEND5
0.000129692	3.67943	0.091	0.005	1	ASDC	AL118506.1
0.000129984	3.5018	0.091	0.005	1	ASDC	NRG2
0.000133321	3.49389	0.091	0.005	1	ASDC	TMEM86A
0.000136077	3.49984	0.091	0.005	1	ASDC	SLC15A2
0.000139086	1.68067	0.273	0.04	1	ASDC	FAM102B
0.00013998	1.20115	1	0.56	1	ASDC	ERP29
0.000140594	1.66109	0.273	0.04	1	ASDC	NUBPL
0.000144402	1.39916	0.727	0.205	1	ASDC	TMEM109
0.000145097	4.07411	0.091	0.006	1	ASDC	AC008966.1
0.000146536	1.84921	0.727	0.223	1	ASDC	ENY2
0.000148164	2.26115	0.273	0.041	1	ASDC	ATP11C
0.000148477	3.37855	0.091	0.006	1	ASDC	SYCP3
0.000153449	3.72939	0.091	0.006	1	ASDC	ZNF772
0.000154026	2.22461	0.636	0.197	1	ASDC	MAN2B1
0.000157876	2.39673	0.182	0.02	1	ASDC	SEMA4B
0.000164302	1.20631	0.818	0.247	1	ASDC	VPS35
0.00017157	2.09696	0.273	0.041	1	ASDC	CNP
0.000172873	0.172414	0.455	0.092	1	ASDC	CYBB
0.000176295	1.90246	0.273	0.041	1	ASDC	HCCS
0.000178804	3.06755	0.091	0.006	1	ASDC	PFKFB2
0.000180428	3.52709	0.091	0.006	1	ASDC	ZNF70
0.00018295	4.7621	0.091	0.006	1	ASDC	AL353759.1
0.000190153	1.76782	0.455	0.106	1	ASDC	RAB11FIP1
0.000190689	2.12314	0.182	0.02	1	ASDC	RGS18
0.000193573	1.57735	0.364	0.067	1	ASDC	IDH3A
0.000194525	5.57876	0.091	0.006	1	ASDC	SIRPG-AS1
0.000194681	1.34281	0.545	0.134	1	ASDC	NAGK
0.000198572	1.40804	0.727	0.233	1	ASDC	IGFLR1
0.000199282	3.03884	0.182	0.021	1	ASDC	NSMF
0.000199559	1.30319	0.636	0.169	1	ASDC	EVI2A
0.000205438	3.7488	0.273	0.044	1	ASDC	C15orf39
0.000208643	2.30804	0.182	0.02	1	ASDC	AC012615.1
0.000210136	1.75198	0.364	0.068	1	ASDC	C8orf76
0.000210141	1.91399	0.364	0.069	1	ASDC	ZDHHC7
0.000214056	3.38794	0.091	0.006	1	ASDC	AL451085.2
0.000214483	1.77401	0.636	0.183	1	ASDC	CARD11
0.00022127	3.63484	0.091	0.006	1	ASDC	GRB10
0.000222624	4.68948	0.091	0.006	1	ASDC	MFSD2A
0.000225239	3.55345	0.091	0.006	1	ASDC	RNF122
0.000230201	3.63132	0.273	0.044	1	ASDC	PEMT
0.000231874	4.64284	0.091	0.006	1	ASDC	AL365272.1
0.00023614	2.37799	0.182	0.021	1	ASDC	C14orf28
0.000236745	3.61534	0.091	0.006	1	ASDC	AC007566.1
0.000238847	2.76566	0.182	0.021	1	ASDC	PON2
0.000240648	2.06303	0.273	0.043	1	ASDC	CPNE8
0.000245019	1.60549	0.545	0.142	1	ASDC	CYB5B
0.000246284	3.65389	0.091	0.006	1	ASDC	GAS8
0.000246514	2.82788	0.091	0.006	1	ASDC	LINC01150
0.000253401	1.8652	0.273	0.042	1	ASDC	DUSP18
0.000253783	3.47225	0.091	0.006	1	ASDC	ZNF350-AS1
0.000254453	1.71897	0.182	0.021	1	ASDC	PLB1
0.00026014	-1.66939	0.909	0.875	1	ASDC	HLA-A
0.000275544	2.15548	0.182	0.021	1	ASDC	SLC30A1
0.000277251	4.66777	0.091	0.006	1	ASDC	AC007637.1
0.00027782	1.80187	0.455	0.105	1	ASDC	UROD
0.000282088	1.20649	1	0.455	1	ASDC	SELENOH
0.000282461	-6.15842	0	0.614	1	ASDC	KLF2
0.000282939	2.34782	0.182	0.022	1	ASDC	CD1C
0.000283263	1.16627	0.545	0.133	1	ASDC	PGD
0.000295396	1.57172	0.273	0.043	1	ASDC	MTHFD1L
0.000298603	2.03894	0.364	0.074	1	ASDC	LINC02256
0.00030298	3.74402	0.091	0.006	1	ASDC	AP002813.1
0.000303987	3.39186	0.091	0.006	1	ASDC	CD300LF
0.000307923	1.57836	0.364	0.07	1	ASDC	STRADA
0.000310421	4.37618	0.182	0.022	1	ASDC	CHAF1A
0.00031227	2.00658	0.182	0.021	1	ASDC	MAP3K20
0.000317176	1.21334	0.636	0.184	1	ASDC	HSBP1
0.000321061	3.74277	0.091	0.006	1	ASDC	MMRN1
0.000325787	3.46496	0.091	0.006	1	ASDC	AC074117.1
0.000327963	1.75858	0.364	0.073	1	ASDC	HGSNAT
0.000333007	2.91075	0.364	0.073	1	ASDC	EIF3B
0.000334823	-2.64759	0.636	0.798	1	ASDC	BTG1
0.000335401	3.27438	0.091	0.006	1	ASDC	TTC8
0.000339819	3.65856	0.091	0.006	1	ASDC	SPRY2
0.000342307	1.11624	0.636	0.168	1	ASDC	PSMB7
0.000343327	2.47854	0.273	0.047	1	ASDC	THG1L
0.000350899	2.41346	0.091	0.006	1	ASDC	LINC01357
0.000350899	2.90107	0.091	0.006	1	ASDC	ZGLP1
0.000354321	1.51801	0.273	0.043	1	ASDC	PRR3
0.000354768	1.998	0.182	0.022	1	ASDC	PER2
0.000373188	3.35369	0.091	0.006	1	ASDC	ZNF358
0.000381534	1.96048	0.182	0.022	1	ASDC	DOCK5
0.000384039	-5.573	0	0.598	1	ASDC	CD3D
0.000384534	1.5086	0.909	0.336	1	ASDC	REEP5
0.000389344	1.62597	0.273	0.043	1	ASDC	TARS2
0.000391909	1.45005	0.636	0.19	1	ASDC	ATP6AP1
0.000396351	1.98015	0.636	0.226	1	ASDC	CAPG
0.000396985	1.25622	0.455	0.102	1	ASDC	SETD3
0.000397386	2.20291	0.545	0.157	1	ASDC	BUD23
0.000397546	2.5233	0.455	0.106	1	ASDC	NUP42
0.000398526	-3.57683	0.091	0.663	1	ASDC	GIMAP7
0.000403151	-5.3213	0	0.595	1	ASDC	GIMAP4
0.000403349	3.78136	0.091	0.006	1	ASDC	E2F5
0.000403379	4.05317	0.091	0.006	1	ASDC	FAM30A
0.000405444	1.83356	0.364	0.072	1	ASDC	NFKB2
0.000412839	2.97862	0.364	0.077	1	ASDC	UBE2Z
0.00041704	1.39723	0.909	0.49	1	ASDC	PLP2
0.00041937	3.34777	0.091	0.006	1	ASDC	RAD9B
0.000420962	1.17181	0.545	0.138	1	ASDC	EFHD2
0.000421689	1.70182	0.273	0.044	1	ASDC	DHCR24
0.000433013	2.08599	0.364	0.076	1	ASDC	KATNA1
0.000435772	3.31287	0.091	0.006	1	ASDC	PDZD2
0.000439973	1.30515	0.909	0.488	1	ASDC	PARK7
0.000450495	2.75732	0.545	0.178	1	ASDC	UVRAG
0.000451438	2.13047	0.273	0.046	1	ASDC	ADAT1
0.000452939	-3.62194	0.364	0.719	1	ASDC	IFITM1
0.000456067	1.11647	0.545	0.134	1	ASDC	MED13L
0.000457007	1.92485	0.273	0.047	1	ASDC	CDK2AP1
0.000457203	1.11941	0.909	0.45	1	ASDC	RAC1
0.000459406	2.87328	0.364	0.078	1	ASDC	IMMP1L
0.000463564	2.41072	0.182	0.023	1	ASDC	NXT2
0.000477958	2.18097	0.364	0.074	1	ASDC	HIST1H2AC
0.000481512	1.39947	0.909	0.637	1	ASDC	COTL1
0.00048464	2.06661	0.273	0.046	1	ASDC	ST3GAL2
0.000491037	1.78855	0.273	0.045	1	ASDC	GMPPB
0.000492327	3.57932	0.091	0.006	1	ASDC	ICOSLG
0.000494456	3.29282	0.091	0.006	1	ASDC	SPESP1
0.000500886	1.19539	0.545	0.142	1	ASDC	CAT
0.000504648	2.23111	0.273	0.047	1	ASDC	NFKBID
0.000507391	1.07811	0.364	0.071	1	ASDC	SLC25A13
0.000507472	3.13731	0.182	0.023	1	ASDC	UBE2T
0.000511827	1.2818	0.818	0.553	1	ASDC	TUBA1B
0.000520591	3.53371	0.182	0.024	1	ASDC	TRAF4
0.00052864	3.50979	0.364	0.081	1	ASDC	NCOR2
0.000530774	3.30969	0.182	0.023	1	ASDC	TRIO
0.00053272	1.5269	0.455	0.108	1	ASDC	CTNNBL1
0.000532857	4.45192	0.091	0.007	1	ASDC	RRAGD
0.000542276	2.30938	0.182	0.023	1	ASDC	PLD2
0.000542586	1.44245	0.273	0.046	1	ASDC	ENTPD1
0.000546062	1.1149	0.273	0.046	1	ASDC	RAB32
0.000550276	1.37552	1	0.58	1	ASDC	SRGN
0.000554795	2.99416	0.091	0.007	1	ASDC	VAV2
0.000559595	2.42459	0.182	0.023	1	ASDC	IRAK3
0.000559762	2.34984	0.455	0.119	1	ASDC	PLEKHA2
0.000560991	1.01092	1	0.846	1	ASDC	VIM
0.000563706	1.53556	0.909	0.492	1	ASDC	NAP1L1
0.000585025	1.63847	0.727	0.259	1	ASDC	H2AFY
0.000585696	2.72117	0.364	0.076	1	ASDC	KDM5B
0.000586438	1.11845	0.909	0.511	1	ASDC	GNG5
0.000594076	1.72751	0.364	0.075	1	ASDC	GCDH
0.000596532	2.95593	0.364	0.078	1	ASDC	SLC39A3
0.000598048	2.95769	0.091	0.007	1	ASDC	NEDD4L
0.000602349	3.70794	0.091	0.007	1	ASDC	ZBTB34
0.000622672	3.52826	0.091	0.007	1	ASDC	SLC35F3
0.000625299	2.07695	0.182	0.023	1	ASDC	GATB
0.00062711	1.82436	0.182	0.023	1	ASDC	GNGT2
0.000631208	2.92997	0.182	0.024	1	ASDC	AC068282.1
0.000632274	1.37028	0.364	0.074	1	ASDC	NOP16
0.000643713	1.32305	0.636	0.18	1	ASDC	ARRDC1
0.000647751	3.21942	0.182	0.024	1	ASDC	USP30-AS1
0.00065004	6.10916	0.091	0.007	1	ASDC	NIBAN3
0.000653141	1.43952	0.636	0.203	1	ASDC	CYBC1
0.000657778	1.74373	0.364	0.077	1	ASDC	MCM7
0.000664895	1.21268	0.545	0.145	1	ASDC	UBE2E1
0.000668227	4.28171	0.091	0.007	1	ASDC	DLG4
0.00067393	2.31519	0.273	0.05	1	ASDC	DHRS4L2
0.000684795	1.10147	0.727	0.233	1	ASDC	NAPA
0.000685963	4.23889	0.091	0.007	1	ASDC	TMEM67
0.000689298	3.76607	0.091	0.007	1	ASDC	FAM122A
0.000703259	3.49074	0.091	0.007	1	ASDC	BX293535.1
0.000705521	3.45942	0.091	0.007	1	ASDC	GPR35
0.000705683	2.36125	0.182	0.024	1	ASDC	BAHD1
0.000706692	4.54207	0.091	0.007	1	ASDC	TMEM265
0.000710506	4.42374	0.091	0.007	1	ASDC	AL033527.4
0.000710725	-5.16321	0	0.564	1	ASDC	LCK
0.000710982	2.1817	0.182	0.023	1	ASDC	ZBTB9
0.000711277	0.7991	0.545	0.133	1	ASDC	MRPL24
0.00071182	1.83984	0.182	0.023	1	ASDC	B3GALNT2
0.000718522	2.75004	0.273	0.05	1	ASDC	AMPD3
0.00073083	2.89569	0.182	0.024	1	ASDC	GPR146
0.000738982	2.22735	0.182	0.024	1	ASDC	LILRA2
0.000742221	2.49037	0.364	0.081	1	ASDC	CTNNA1
0.000751837	2.20573	0.182	0.024	1	ASDC	BBS1
0.000753874	3.40994	0.091	0.007	1	ASDC	ZNF629
0.000774722	1.78881	0.364	0.081	1	ASDC	PRKCD
0.000802238	2.4293	0.182	0.024	1	ASDC	CCDC86
0.00080581	1.95236	0.273	0.049	1	ASDC	IRF5
0.000826285	1.60544	0.364	0.078	1	ASDC	CCDC22
0.000827222	1.09078	0.636	0.185	1	ASDC	LYPLA1
0.000842538	2.64786	0.091	0.007	1	ASDC	PXDC1
0.000855499	2.60184	0.182	0.025	1	ASDC	SIGLEC9
0.000855756	-5.70806	0.091	0.598	1	ASDC	IL7R
0.00085993	1.27642	0.909	0.348	1	ASDC	CANX
0.000863497	1.54463	0.273	0.048	1	ASDC	BARD1
0.000865677	0.808911	0.545	0.138	1	ASDC	RIF1
0.000866833	1.95878	0.636	0.229	1	ASDC	PHB
0.000869959	2.98303	0.091	0.007	1	ASDC	STX17-AS1
0.000870176	1.73187	0.545	0.157	1	ASDC	SPIDR
0.000870425	1.47375	0.455	0.114	1	ASDC	GUSB
0.000872311	2.5795	0.182	0.025	1	ASDC	REC8
0.000895488	1.34222	0.727	0.248	1	ASDC	TXNL4A
0.000897882	2.4143	0.273	0.052	1	ASDC	NCLN
0.000900765	1.4893	0.364	0.078	1	ASDC	TOB2
0.000903485	1.17532	0.455	0.109	1	ASDC	NMRAL1
0.000907475	2.52852	0.455	0.125	1	ASDC	IDH3B
0.000910765	4.42397	0.091	0.007	1	ASDC	RNF227
0.000916286	1.06616	0.727	0.231	1	ASDC	HMGA1
0.000916519	2.82158	0.091	0.007	1	ASDC	ZNF804A
0.000924052	3.68409	0.091	0.007	1	ASDC	MYH11
0.000925031	1.01917	0.727	0.246	1	ASDC	CAPZA2
0.000930977	1.73679	0.727	0.29	1	ASDC	TUBA1A
0.000932915	1.9316	0.182	0.025	1	ASDC	C19orf38
0.000947152	3.21799	0.091	0.007	1	ASDC	EFCAB10
0.000948514	1.47754	0.273	0.048	1	ASDC	TRIM25
0.000969335	1.22787	0.545	0.15	1	ASDC	MANF
0.00098334	1.96936	0.545	0.152	1	ASDC	DNAJC3
0.00100429	2.02295	0.182	0.024	1	ASDC	ZFP30
0.00100627	0.946072	0.273	0.048	1	ASDC	HAVCR2
0.0010188	0.971294	0.909	0.379	1	ASDC	TLN1
0.00103946	1.79059	0.182	0.024	1	ASDC	ZNF69
0.00104047	1.32455	0.364	0.078	1	ASDC	HSD17B4
0.00104063	1.69108	0.364	0.08	1	ASDC	LMBR1L
0.0010503	1.44658	0.455	0.117	1	ASDC	ABI3
0.00105268	2.2401	0.273	0.051	1	ASDC	OGFOD3
0.00105374	1.45797	0.455	0.115	1	ASDC	SLC35C2
0.00105481	2.37476	0.455	0.124	1	ASDC	CCDC57
0.0010556	2.59464	0.091	0.007	1	ASDC	NRP1
0.00106934	2.6845	0.182	0.025	1	ASDC	LINC01684
0.00110547	1.93384	0.182	0.025	1	ASDC	THAP9-AS1
0.00111776	2.86904	0.091	0.007	1	ASDC	FKBP1B
0.00112524	1.67179	0.364	0.081	1	ASDC	ARSA
0.00112594	1.68133	0.273	0.05	1	ASDC	EIF4EBP3
0.00113662	1.73384	0.273	0.051	1	ASDC	PLAUR
0.00114967	2.7577	0.182	0.026	1	ASDC	ICAM1
0.00116756	0.999092	0.818	0.262	1	ASDC	DOCK2
0.00117139	1.43731	0.273	0.05	1	ASDC	RYBP
0.00117397	2.05412	0.182	0.025	1	ASDC	RRNAD1
0.00117862	3.33615	0.091	0.007	1	ASDC	IRGQ
0.00118762	1.17907	0.455	0.114	1	ASDC	UBAP2L
0.0011894	2.10445	0.182	0.025	1	ASDC	TBC1D10B
0.00120331	1.51356	0.455	0.12	1	ASDC	ACSL3
0.00120625	2.26021	0.545	0.172	1	ASDC	MLEC
0.00122791	0.947436	0.636	0.193	1	ASDC	LAMTOR2
0.00123877	1.21794	0.364	0.08	1	ASDC	DUSP22
0.0012407	4.13779	0.091	0.007	1	ASDC	ERI2
0.00125038	2.96106	0.091	0.007	1	ASDC	HIST1H4J
0.00125302	2.52994	0.182	0.026	1	ASDC	BTN2A2
0.00125588	1.92205	0.182	0.026	1	ASDC	SCIMP
0.00125658	-5.05527	0	0.532	1	ASDC	PLAAT4
0.001268	2.68975	0.364	0.084	1	ASDC	BRD3
0.00127063	2.4636	0.273	0.056	1	ASDC	PPP1R14B
0.00128208	1.41379	0.455	0.116	1	ASDC	MED11
0.00129297	1.0585	0.545	0.149	1	ASDC	CSNK1D
0.00129922	1.55295	0.727	0.294	1	ASDC	CD63
0.00130411	1.3081	0.636	0.204	1	ASDC	PSMB4
0.00130908	1.25073	0.273	0.051	1	ASDC	NCF2
0.00131123	0.618908	0.364	0.079	1	ASDC	DPYSL2
0.00132496	2.75407	0.182	0.026	1	ASDC	PLEKHM2
0.00133148	3.64891	0.091	0.007	1	ASDC	ENO1-AS1
0.00133241	0.802814	0.545	0.148	1	ASDC	GNG10
0.00133458	4.09427	0.091	0.008	1	ASDC	LINC01762
0.00133983	3.12986	0.091	0.007	1	ASDC	C20orf197
0.00134005	1.22841	0.545	0.157	1	ASDC	HERC2
0.00135	0.778511	0.545	0.155	1	ASDC	TYMP
0.00136214	2.70496	0.182	0.026	1	ASDC	TCF3
0.00137539	-1.84363	0.727	0.789	1	ASDC	SARAF
0.00137993	2.81291	0.091	0.007	1	ASDC	SNX22
0.00139804	1.13259	0.818	0.302	1	ASDC	CCT6A
0.00141072	0.968652	0.636	0.189	1	ASDC	CYB5R3
0.0014168	2.25504	0.182	0.026	1	ASDC	PDLIM1
0.00142102	3.90907	0.182	0.027	1	ASDC	NPIPB4
0.0014225	1.86171	0.364	0.087	1	ASDC	EXOG
0.00142527	1.12672	0.364	0.079	1	ASDC	PTPA
0.00143168	1.75359	0.273	0.052	1	ASDC	CFP
0.00143383	2.05408	0.182	0.026	1	ASDC	ACAP3
0.00143729	1.32942	0.364	0.082	1	ASDC	ENOSF1
0.00144003	1.44105	0.273	0.051	1	ASDC	SPAST
0.00144795	2.04713	0.182	0.026	1	ASDC	TMTC4
0.00144921	4.03086	0.091	0.008	1	ASDC	ZNF777
0.00145539	1.6382	0.545	0.164	1	ASDC	ACAA1
0.00146349	3.15585	0.091	0.007	1	ASDC	DBF4B
0.00147176	0.778886	0.364	0.078	1	ASDC	CHPT1
0.00148088	1.2342	0.364	0.08	1	ASDC	R3HCC1
0.00148668	0.577501	0.636	0.178	1	ASDC	UBE2K
0.00149713	1.14104	0.455	0.114	1	ASDC	POLD2
0.00150257	3.14536	0.091	0.008	1	ASDC	PROCA1
0.00150507	1.55973	0.182	0.026	1	ASDC	CTBP2
0.00153545	2.9271	0.091	0.008	1	ASDC	AL078600.1
0.00154823	1.88304	0.182	0.026	1	ASDC	ZNF783
0.00155203	0.902632	0.364	0.079	1	ASDC	AC100810.1
0.00158382	1.36119	0.818	0.364	1	ASDC	CSK
0.00158581	4.016	0.182	0.027	1	ASDC	PHC2
0.00159151	2.4281	0.182	0.027	1	ASDC	CYTH3
0.001602	1.90577	0.364	0.094	1	ASDC	EIF4G3
0.00161055	1.40507	0.273	0.051	1	ASDC	TNRC18
0.00161231	2.17434	0.182	0.026	1	ASDC	TUBG1
0.0016202	4.4299	0.091	0.008	1	ASDC	LIMD1-AS1
0.00162559	1.31728	0.455	0.126	1	ASDC	CUX1
0.00162603	1.96271	0.182	0.026	1	ASDC	LINC02762
0.00165128	4.0999	0.091	0.008	1	ASDC	CSF2RB
0.0016537	1.97118	0.273	0.053	1	ASDC	INF2
0.00166665	-1.14138	1	0.89	1	ASDC	HLA-C
0.00167714	1.56648	0.273	0.052	1	ASDC	PPP1R15A
0.001682	4.36195	0.091	0.008	1	ASDC	AC010331.1
0.00168433	2.41105	0.182	0.027	1	ASDC	TIMP2
0.00170622	1.35406	0.364	0.084	1	ASDC	MICU1
0.00170869	1.91992	0.182	0.026	1	ASDC	MECR
0.00171613	1.9377	0.545	0.172	1	ASDC	AFF4
0.0017184	4.1597	0.091	0.008	1	ASDC	MYOM1
0.00171905	1.88558	0.182	0.026	1	ASDC	CLCN6
0.00173691	1.18628	0.273	0.051	1	ASDC	ASCC1
0.00173854	1.97436	0.455	0.12	1	ASDC	PHKB
0.00177316	-4.96591	0	0.511	1	ASDC	GIMAP5
0.00178575	5.83566	0.091	0.008	1	ASDC	MAP1A
0.0017894	-5.1938	0	0.511	1	ASDC	TRBC2
0.00179173	1.72145	0.364	0.089	1	ASDC	REV1
0.00179321	1.27671	0.364	0.081	1	ASDC	SDHAF3
0.00181026	2.17934	0.182	0.027	1	ASDC	TTYH2
0.00181713	4.09503	0.091	0.008	1	ASDC	GPX3
0.00181737	3.59018	0.091	0.008	1	ASDC	AC011444.1
0.00181804	1.37086	0.182	0.027	1	ASDC	HFM1
0.00182167	1.10643	0.545	0.154	1	ASDC	VBP1
0.00184433	3.15381	0.273	0.055	1	ASDC	TATDN3
0.00184557	1.18941	0.273	0.052	1	ASDC	MTHFR
0.00185772	2.3066	0.182	0.027	1	ASDC	ZNF689
0.00187545	0.947976	0.545	0.151	1	ASDC	AASDHPPT
0.00188794	1.06936	0.455	0.119	1	ASDC	TMEM30A
0.00190225	1.37114	0.727	0.389	1	ASDC	GDI2
0.00190855	-5.19634	0	0.507	1	ASDC	SKAP1
0.00190883	1.57305	0.182	0.027	1	ASDC	OSBPL1A
0.00191177	1.24744	0.545	0.169	1	ASDC	PPM1M
0.0019163	1.37493	0.727	0.275	1	ASDC	NCF1
0.00192061	1.6386	0.364	0.089	1	ASDC	EIF2AK4
0.00193682	1.41553	0.273	0.053	1	ASDC	IKZF5
0.00193787	0.354457	0.273	0.052	1	ASDC	LRMDA
0.001944	1.50896	0.273	0.053	1	ASDC	TRMT1L
0.00194784	1.22112	0.364	0.083	1	ASDC	MAP3K11
0.0019884	-5.18786	0	0.504	1	ASDC	LINC00861
0.0019962	3.15687	0.091	0.008	1	ASDC	THBS3
0.00199803	3.45736	0.091	0.008	1	ASDC	NUDT17
0.00200031	3.45969	0.182	0.028	1	ASDC	MFSD12
0.00200489	2.9787	0.091	0.008	1	ASDC	TBC1D24
0.0020054	1.18365	0.364	0.084	1	ASDC	ADNP
0.00201456	1.39469	0.636	0.274	1	ASDC	AP2S1
0.00201458	1.98444	0.182	0.027	1	ASDC	SAP25
0.00201985	2.08972	0.182	0.027	1	ASDC	LIN7B
0.0020222	1.15179	0.727	0.299	1	ASDC	DCXR
0.00203724	1.32322	0.455	0.129	1	ASDC	TRMT1
0.00205517	2.74087	0.182	0.028	1	ASDC	DHTKD1
0.00207537	2.97424	0.091	0.008	1	ASDC	ZGRF1
0.00207942	2.6068	0.364	0.094	1	ASDC	RAP1GAP2
0.00210038	-1.87108	0.636	0.796	1	ASDC	PTPRC
0.00210168	2.08235	0.727	0.265	1	ASDC	SNX17
0.00211055	4.11079	0.091	0.008	1	ASDC	ZNF625
0.00211793	1.47641	0.455	0.128	1	ASDC	PPP2R3C
0.00212158	1.05929	0.273	0.053	1	ASDC	NAGA
0.00213234	1.70642	0.364	0.092	1	ASDC	DISC1
0.00214259	2.50032	0.182	0.028	1	ASDC	GNA15
0.00214735	1.27774	0.364	0.085	1	ASDC	TMEM175
0.00214973	2.08007	0.455	0.124	1	ASDC	PHACTR4
0.00215506	2.21888	0.455	0.133	1	ASDC	NFATC2IP
0.00215568	1.88547	0.273	0.055	1	ASDC	EHBP1L1
0.00219112	1.2168	0.273	0.053	1	ASDC	CBWD5
0.00222392	0.966574	0.545	0.158	1	ASDC	ATOX1
0.00223323	0.65529	0.455	0.123	1	ASDC	LGALS9
0.00224584	-2.61592	0.364	0.682	1	ASDC	FYB1
0.00225883	2.74811	0.364	0.094	1	ASDC	SGSM3
0.00225983	2.3241	0.273	0.058	1	ASDC	MXD4
0.00228797	1.04	0.455	0.119	1	ASDC	MRPS23
0.00228817	1.52328	0.364	0.088	1	ASDC	CCDC137
0.00229303	1.93471	0.273	0.055	1	ASDC	AASDH
0.00229578	4.19127	0.182	0.03	1	ASDC	CCDC77
0.00230648	3.0916	0.091	0.008	1	ASDC	HS6ST1
0.00230938	1.06833	0.364	0.084	1	ASDC	ZNF791
0.00233648	1.25426	0.364	0.089	1	ASDC	ATG7
0.00234901	2.91438	0.091	0.008	1	ASDC	AC008957.1
0.00238758	2.90812	0.091	0.008	1	ASDC	TMSB15B-AS1
0.00240076	2.76625	0.364	0.1	1	ASDC	MAP3K2
0.00240876	3.42211	0.182	0.03	1	ASDC	FAM49A
0.00241821	2.75474	0.182	0.029	1	ASDC	CEP162
0.00244009	3.35067	0.091	0.008	1	ASDC	XYLB
0.00246279	1.05726	0.455	0.123	1	ASDC	TIMM10
0.00247928	1.91029	0.273	0.056	1	ASDC	TMEM251
0.00248116	1.48774	0.273	0.054	1	ASDC	RNF25
0.00248409	2.10147	0.182	0.028	1	ASDC	GTF2H2C
0.00252756	1.81428	0.455	0.135	1	ASDC	MIF4GD
0.00254114	2.72837	0.091	0.008	1	ASDC	PKIG
0.00254543	1.72093	0.636	0.236	1	ASDC	FAAP20
0.00255374	1.29218	0.364	0.086	1	ASDC	NDRG1
0.00258134	1.34085	0.273	0.055	1	ASDC	UBAC1
0.00258561	1.05611	0.727	0.265	1	ASDC	CTSS
0.00259965	3.41456	0.364	0.108	1	ASDC	IRF2BP2
0.0026146	3.01235	0.091	0.008	1	ASDC	INSL6
0.00261615	1.51211	0.455	0.132	1	ASDC	PABPN1
0.00262224	1.47547	0.273	0.055	1	ASDC	NADK
0.00262622	3.86459	0.091	0.008	1	ASDC	HIST1H2BF
0.0026653	1.58084	0.364	0.09	1	ASDC	NTAN1
0.00271681	3.15116	0.273	0.059	1	ASDC	NAT10
0.00272729	1.14861	0.273	0.054	1	ASDC	AP3S2
0.00276398	0.780279	1	0.589	1	ASDC	ITGB2
0.00278627	0.856886	0.727	0.324	1	ASDC	YWHAH
0.00279203	1.40445	0.273	0.054	1	ASDC	XKR8
0.00280104	0.775478	0.455	0.12	1	ASDC	MFSD1
0.00281614	-0.525639	1	0.962	1	ASDC	RPS15A
0.00282243	1.12	0.909	0.53	1	ASDC	TAGLN2
0.00284504	1.81678	0.182	0.029	1	ASDC	CD38
0.00284658	3.09725	0.091	0.008	1	ASDC	LINC01374
0.00286319	2.86203	0.091	0.008	1	ASDC	NFYC-AS1
0.00288726	2.48939	0.091	0.008	1	ASDC	SNX32
0.00289466	1.71066	0.182	0.028	1	ASDC	NUP50-DT
0.00290518	1.44342	0.364	0.089	1	ASDC	CD151
0.00291425	1.98377	0.182	0.029	1	ASDC	SLFN11
0.00292549	1.33811	0.273	0.056	1	ASDC	TSPAN3
0.00293712	0.967931	0.455	0.124	1	ASDC	DUSP23
0.00295498	3.16695	0.273	0.059	1	ASDC	VPS11
0.00295596	2.75772	0.091	0.008	1	ASDC	EFCAB11
0.00296927	2.69997	0.091	0.008	1	ASDC	MMACHC
0.00297218	0.910731	0.727	0.324	1	ASDC	NPC2
0.00298767	1.74877	0.182	0.028	1	ASDC	ATPAF2
0.00299067	-4.88421	0	0.479	1	ASDC	CD247
0.00300835	2.03175	0.273	0.059	1	ASDC	F11R
0.00306905	1.96596	0.727	0.3	1	ASDC	PPM1G
0.00308225	0.984407	0.455	0.124	1	ASDC	MTCH2
0.00309216	-2.67623	0.273	0.638	1	ASDC	PCED1B-AS1
0.00310081	3.38268	0.091	0.009	1	ASDC	GRK4
0.00312315	1.77135	0.182	0.029	1	ASDC	UGDH
0.0031341	3.98584	0.091	0.009	1	ASDC	ATP6V1G2
0.00314256	1.05036	0.727	0.285	1	ASDC	RTN4
0.00318202	2.46526	0.364	0.091	1	ASDC	MACO1
0.00322453	-3.91114	0.091	0.529	1	ASDC	ZFP36L1
0.00323643	1.71256	0.182	0.029	1	ASDC	SPATC1L
0.00325173	1.38132	0.545	0.198	1	ASDC	SUMO3
0.00325371	1.35251	0.364	0.09	1	ASDC	ECE1
0.00325679	-0.486478	1	0.964	1	ASDC	RPL30
0.0032598	3.57219	0.091	0.009	1	ASDC	SOX2-OT
0.00326847	2.19259	0.364	0.1	1	ASDC	SFT2D2
0.00330775	2.27912	0.091	0.009	1	ASDC	AL035446.2
0.00331228	1.83355	0.273	0.058	1	ASDC	DAPP1
0.00333384	1.79398	0.182	0.029	1	ASDC	IDUA
0.00335128	1.40463	0.364	0.09	1	ASDC	RBM14
0.00335335	3.28315	0.273	0.063	1	ASDC	EDEM2
0.00336158	1.83082	0.545	0.177	1	ASDC	ARPC1A
0.00336336	0.660817	1	0.934	1	ASDC	FTH1
0.00336578	2.10156	0.455	0.138	1	ASDC	DYNC1I2
0.00337362	1.39971	0.455	0.152	1	ASDC	BRI3
0.00339961	0.793109	0.364	0.09	1	ASDC	IFNGR2
0.00340417	1.27254	0.545	0.177	1	ASDC	MRPS7
0.00341106	1.38777	0.364	0.091	1	ASDC	CLPX
0.00341309	1.77715	0.182	0.029	1	ASDC	LRRC37B
0.00342304	1.70357	0.182	0.029	1	ASDC	DHX58
0.00342461	2.04496	0.182	0.03	1	ASDC	RPS6KA2
0.00342989	1.67685	0.091	0.009	1	ASDC	NR4A3
0.00344514	1.3865	0.273	0.057	1	ASDC	TXLNA
0.00345221	1.69043	0.182	0.029	1	ASDC	TMEM150A
0.0034858	1.72107	0.182	0.03	1	ASDC	MCTP1
0.00349134	3.93094	0.091	0.009	1	ASDC	AC025165.2
0.00349566	1.13418	0.273	0.056	1	ASDC	MFSD14B
0.00354859	1.19101	0.273	0.056	1	ASDC	TMEM127
0.0035913	3.08136	0.091	0.009	1	ASDC	AL162231.2
0.00359377	0.618672	0.636	0.199	1	ASDC	APPL1
0.00359635	2.90785	0.091	0.009	1	ASDC	SPACA9
0.00360792	3.18343	0.273	0.06	1	ASDC	REPIN1
0.003616	2.92544	0.091	0.009	1	ASDC	SLC41A2
0.0036237	2.82831	0.091	0.009	1	ASDC	CCRL2
0.00362565	3.46198	0.091	0.009	1	ASDC	AC240274.1
0.00364649	1.02916	0.455	0.128	1	ASDC	IPO7
0.00365516	1.7969	0.273	0.059	1	ASDC	SNX18
0.00365724	1.28726	0.818	0.419	1	ASDC	GABARAPL2
0.00365968	1.70049	0.182	0.029	1	ASDC	TBC1D22B
0.00366302	2.91688	0.091	0.009	1	ASDC	KDM7A-DT
0.00366539	1.23034	0.455	0.134	1	ASDC	SRA1
0.00367056	1.21649	0.273	0.057	1	ASDC	KPNA2
0.00367418	1.77924	0.273	0.059	1	ASDC	ADAM15
0.00371212	0.942203	0.909	0.584	1	ASDC	EIF4A1
0.00372071	0.978123	0.818	0.402	1	ASDC	LSM7
0.00375237	1.56214	0.364	0.098	1	ASDC	HIBCH
0.003769	0.882354	0.364	0.089	1	ASDC	SEC14L1
0.00379691	1.00894	0.545	0.167	1	ASDC	ZNHIT3
0.00383533	0.878312	0.455	0.123	1	ASDC	SYS1
0.00387937	1.33943	0.273	0.057	1	ASDC	RBM15B
0.00391384	1.88476	0.273	0.06	1	ASDC	TICAM1
0.00392951	1.76184	0.273	0.06	1	ASDC	MSH2
0.00394233	2.17806	0.273	0.064	1	ASDC	UBAP2
0.00394531	0.836561	0.909	0.659	1	ASDC	TPM3
0.00396698	2.90177	0.091	0.009	1	ASDC	C20orf96
0.00405795	0.769144	0.455	0.123	1	ASDC	ZNF277
0.00408083	0.875779	1	0.836	1	ASDC	MYL6
0.00408573	-0.575053	1	0.96	1	ASDC	RPS28
0.00409415	3.91735	0.091	0.009	1	ASDC	AC090114.2
0.00409779	2.49991	0.091	0.009	1	ASDC	AC012291.3
0.00410049	1.08455	0.455	0.13	1	ASDC	PLEKHB2
0.00415043	0.467236	0.364	0.088	1	ASDC	ARHGAP18
0.00415548	2.92401	0.273	0.062	1	ASDC	ANKAR
0.00420477	1.96008	0.182	0.03	1	ASDC	PICK1
0.00422298	1.70881	0.364	0.094	1	ASDC	SLC25A26
0.00423244	5.58925	0.091	0.009	1	ASDC	LRRC53
0.00428287	1.15331	0.273	0.057	1	ASDC	BICD2
0.00431238	0.399244	0.909	0.957	1	ASDC	RPS23
0.00431366	1.25709	0.273	0.058	1	ASDC	SNX12
0.00432535	1.0454	0.636	0.239	1	ASDC	MLF2
0.00435933	1.86084	0.182	0.03	1	ASDC	DNHD1
0.00437101	2.82887	0.091	0.009	1	ASDC	MEF2C-AS1
0.00437113	1.35439	0.364	0.095	1	ASDC	PRR14L
0.00438335	2.86292	0.091	0.009	1	ASDC	WNT10A
0.00439115	2.83755	0.091	0.009	1	ASDC	DVL1
0.00445579	2.74066	0.091	0.009	1	ASDC	ZMYM4-AS1
0.00446663	1.06529	0.273	0.059	1	ASDC	PLCG2
0.00454857	1.35692	0.364	0.098	1	ASDC	WDFY2
0.0045975	2.6386	0.091	0.009	1	ASDC	CHST2
0.00465359	3.34593	0.091	0.009	1	ASDC	NPHP4
0.00466025	1.0113	0.273	0.058	1	ASDC	CYSLTR1
0.00466377	2.64357	0.182	0.032	1	ASDC	CITED4
0.00467589	2.09963	0.182	0.031	1	ASDC	BPGM
0.00474761	1.28954	0.364	0.099	1	ASDC	PLSCR1
0.00474928	-1.12267	0.727	0.858	1	ASDC	ARHGDIB
0.00475747	2.95239	0.091	0.009	1	ASDC	ZNF532
0.00477476	2.60157	0.091	0.009	1	ASDC	NBEA
0.00479246	2.70936	0.091	0.009	1	ASDC	ZNF425
0.00491397	1.16294	0.455	0.137	1	ASDC	NFYC
0.00494638	1.86639	0.182	0.031	1	ASDC	PPCDC
0.00495128	2.82387	0.091	0.009	1	ASDC	CENPF
0.00496179	1.57641	0.545	0.193	1	ASDC	TMEM147
0.0049655	1.43884	0.273	0.06	1	ASDC	MPDU1
0.00498808	1.64978	0.364	0.103	1	ASDC	PHF23
0.00498977	0.607224	0.545	0.172	1	ASDC	ASAH1
0.00499012	2.68461	0.091	0.009	1	ASDC	C3orf62
0.0050017	3.95465	0.091	0.009	1	ASDC	AC004556.3
0.00500745	1.50098	0.182	0.031	1	ASDC	MVB12B
0.00502958	2.9683	0.091	0.009	1	ASDC	NEURL4
0.00504529	3.22264	0.091	0.009	1	ASDC	TLR9
0.00505461	0.839676	0.545	0.174	1	ASDC	KRCC1
0.00510567	2.87053	0.091	0.009	1	ASDC	NREP
0.00510843	1.24537	0.364	0.095	1	ASDC	CXXC1
0.00512531	1.73461	0.545	0.189	1	ASDC	RPS6KA3
0.00513765	2.55561	0.091	0.009	1	ASDC	ZBTB46
0.00515561	0.764837	0.545	0.167	1	ASDC	USP1
0.00517413	1.80904	0.273	0.062	1	ASDC	UTP14A
0.00518167	1.54407	0.455	0.141	1	ASDC	PPA2
0.00519909	0.655086	0.727	0.248	1	ASDC	LBR
0.00521273	0.754718	0.636	0.214	1	ASDC	SRM
0.00522411	1.20105	0.455	0.144	1	ASDC	HEXA
0.00522493	-5.05743	0	0.442	1	ASDC	INPP4B
0.00525205	1.70555	0.273	0.063	1	ASDC	CES2
0.00525332	4.0406	0.091	0.01	1	ASDC	REC114
0.00526332	-4.8757	0	0.441	1	ASDC	SYNE2
0.00527394	2.07783	0.182	0.032	1	ASDC	MPP5
0.00528374	1.41251	0.273	0.061	1	ASDC	UNC93B1
0.00529694	2.7736	0.182	0.033	1	ASDC	RNF26
0.00529696	1.50822	0.182	0.031	1	ASDC	PRKACA
0.00535375	1.39887	0.545	0.177	1	ASDC	RPL7L1
0.0053694	1.55644	0.364	0.104	1	ASDC	ARHGAP26
0.0053741	1.03869	0.455	0.134	1	ASDC	FARSA
0.00541208	2.00099	0.182	0.032	1	ASDC	FBRSL1
0.00549758	1.24853	0.636	0.285	1	ASDC	LAMTOR1
0.00550728	1.38098	0.455	0.144	1	ASDC	ATF4
0.00551507	1.68337	0.182	0.032	1	ASDC	FILIP1L
0.00551967	2.53632	0.091	0.009	1	ASDC	PDE6G
0.00557207	0.992235	0.636	0.244	1	ASDC	POLR2E
0.0055862	1.71931	0.364	0.103	1	ASDC	ZNF609
0.00558894	0.835365	0.455	0.138	1	ASDC	DIAPH2
0.00560498	1.8647	0.455	0.163	1	ASDC	PLEKHJ1
0.00562555	1.67414	0.455	0.153	1	ASDC	CYTH4
0.00563105	2.79614	0.091	0.009	1	ASDC	FANCE
0.00563649	3.92136	0.091	0.01	1	ASDC	AL133477.2
0.00564001	1.11363	0.455	0.14	1	ASDC	MAPRE2
0.00566062	2.26643	0.182	0.032	1	ASDC	FGGY
0.00566398	2.81479	0.091	0.009	1	ASDC	SLC12A4
0.00571165	0.940008	0.273	0.061	1	ASDC	OGFRL1
0.00574283	1.20654	0.273	0.06	1	ASDC	GTF3C5
0.00578415	1.6551	0.636	0.23	1	ASDC	RAB5IF
0.0057928	1.82639	0.273	0.063	1	ASDC	XYLT1
0.00582884	1.22582	0.455	0.139	1	ASDC	MAP3K5
0.0058863	-1.08342	0.818	0.834	1	ASDC	HLA-E
0.00589399	2.86417	0.091	0.01	1	ASDC	CENPW
0.0059385	1.02006	0.727	0.268	1	ASDC	PRKCB
0.00594136	1.38614	0.545	0.178	1	ASDC	TBC1D22A
0.00597805	1.95661	0.182	0.032	1	ASDC	C1orf109
0.00597965	-4.40459	0	0.433	1	ASDC	GIMAP1
0.00602103	1.90261	0.273	0.064	1	ASDC	SERTAD3
0.00602427	1.01509	0.364	0.094	1	ASDC	TOMM40
0.00604169	2.45957	0.182	0.033	1	ASDC	MYPOP
0.00606437	1.14795	0.364	0.097	1	ASDC	NBPF19
0.00607779	1.21064	0.364	0.097	1	ASDC	UTP3
0.0061707	1.45929	0.364	0.102	1	ASDC	UCHL3
0.00623545	0.658848	0.364	0.092	1	ASDC	ABR
0.00625014	1.62141	0.182	0.032	1	ASDC	OPA3
0.00628907	1.21617	0.364	0.099	1	ASDC	ZNF593
0.00633229	-4.40681	0	0.429	1	ASDC	LAT
0.00634923	3.91672	0.091	0.01	1	ASDC	MPND
0.0064029	1.15802	0.727	0.349	1	ASDC	GPR183
0.00641047	3.29774	0.182	0.034	1	ASDC	TOP1MT
0.00648614	0.848376	0.909	0.43	1	ASDC	EIF3M
0.00649255	2.2443	0.273	0.067	1	ASDC	FAM117B
0.00649365	2.78852	0.091	0.01	1	ASDC	ZNF596
0.0065175	1.73255	0.273	0.065	1	ASDC	SMAD4
0.00652884	2.70341	0.091	0.01	1	ASDC	AL161725.1
0.00655665	0.959297	0.909	0.822	1	ASDC	H3F3A
0.00656676	2.77879	0.091	0.01	1	ASDC	B3GAT2
0.00656844	2.62322	0.091	0.01	1	ASDC	MARVELD1
0.00662881	3.20475	0.091	0.01	1	ASDC	RASA4B
0.00668372	2.89276	0.091	0.01	1	ASDC	ZBED6CL
0.00668464	2.69789	0.091	0.01	1	ASDC	SLC17A9
0.00671499	1.27949	0.273	0.062	1	ASDC	CDIP1
0.00673135	2.87506	0.091	0.01	1	ASDC	PEX11A
0.00674274	3.75328	0.091	0.01	1	ASDC	AC010226.1
0.00681429	0.6433	1	0.872	1	ASDC	PPIA
0.00682255	1.24275	0.455	0.146	1	ASDC	ECHS1
0.0068271	1.07754	0.364	0.099	1	ASDC	NQO2
0.00685401	1.04145	0.182	0.032	1	ASDC	SLC7A7
0.00686961	1.84041	0.182	0.033	1	ASDC	TRIT1
0.00687011	2.9612	0.091	0.01	1	ASDC	IGHM
0.00693353	-4.64835	0	0.422	1	ASDC	TC2N
0.00697751	2.37186	0.091	0.01	1	ASDC	BRIP1
0.00698863	-1.39902	0.727	0.805	1	ASDC	ITM2B
0.00699277	1.39941	0.273	0.064	1	ASDC	TIGAR
0.00702681	0.756168	0.545	0.177	1	ASDC	COPA
0.00707398	2.51395	0.091	0.01	1	ASDC	TMSB15B
0.00707572	2.04381	0.182	0.033	1	ASDC	PXMP2
0.00708642	-4.50428	0	0.421	1	ASDC	FLT3LG
0.00714761	1.52863	0.182	0.032	1	ASDC	ACTR5
0.00717303	2.64833	0.091	0.01	1	ASDC	KTN1-AS1
0.00719277	2.67907	0.182	0.035	1	ASDC	WARS2-AS1
0.00719817	1.47506	0.273	0.065	1	ASDC	SP1
0.0072106	1.81664	0.273	0.065	1	ASDC	C11orf21
0.0072555	3.91864	0.091	0.01	1	ASDC	PCOLCE
0.00726373	3.85443	0.182	0.034	1	ASDC	FAM104B
0.00727962	1.07924	0.455	0.145	1	ASDC	UBE2G2
0.00735239	-3.02655	0.364	0.603	1	ASDC	CD2
0.00736073	1.50013	0.364	0.106	1	ASDC	MRPS25
0.00736469	0.78557	0.364	0.096	1	ASDC	DNM1L
0.00743618	3.03145	0.091	0.01	1	ASDC	C8orf88
0.00749695	1.09997	0.818	0.724	1	ASDC	GABARAP
0.00749807	0.996726	0.545	0.192	1	ASDC	DNAJC7
0.00756141	-1.9958	0.545	0.71	1	ASDC	HCST
0.00758466	-4.64332	0	0.416	1	ASDC	CD96
0.00758496	2.09992	0.273	0.07	1	ASDC	C1RL
0.00758736	0.486072	1	0.761	1	ASDC	YBX1
0.0076543	1.30681	0.727	0.288	1	ASDC	ERGIC3
0.00766363	1.09096	0.273	0.062	1	ASDC	CLK2
0.00772501	2.28069	0.182	0.035	1	ASDC	TRAF3IP2-AS1
0.00780291	1.15253	0.364	0.1	1	ASDC	S100PBP
0.00782373	-4.33431	0	0.414	1	ASDC	ARHGEF1
0.00784156	0.942242	0.273	0.062	1	ASDC	MLXIP
0.00788107	3.6671	0.091	0.01	1	ASDC	TOGARAM2
0.00789246	2.51663	0.091	0.01	1	ASDC	RFX2
0.00794343	2.48974	0.091	0.01	1	ASDC	FAM215B
0.00796891	1.56745	0.455	0.156	1	ASDC	COMMD1
0.00801809	1.2348	0.455	0.153	1	ASDC	CCDC69
0.00801844	0.788172	0.455	0.135	1	ASDC	COA6
0.00803325	1.23659	0.455	0.15	1	ASDC	PDHB
0.00804768	1.2326	0.273	0.064	1	ASDC	POLM
0.0080636	1.83693	0.455	0.151	1	ASDC	HOOK3
0.00808557	0.894985	0.545	0.187	1	ASDC	CIR1
0.00810563	2.34141	0.182	0.035	1	ASDC	NEK6
0.00810949	0.816563	0.636	0.238	1	ASDC	COX16
0.00820319	1.97559	0.091	0.01	1	ASDC	IL1R2
0.00823762	1.10228	0.455	0.147	1	ASDC	FKBP3
0.00825629	1.53354	0.182	0.033	1	ASDC	LIG3
0.00829521	-3.86793	0.091	0.472	1	ASDC	ETS1
0.0083092	1.21037	0.273	0.064	1	ASDC	AGPAT2
0.00831358	0.688332	0.545	0.178	1	ASDC	CHMP4B
0.00831568	2.60697	0.091	0.01	1	ASDC	LINC02812
0.0083293	2.18547	0.182	0.035	1	ASDC	FAM135A
0.00848527	0.683692	0.545	0.176	1	ASDC	MRPL18
0.00851084	2.85545	0.091	0.01	1	ASDC	ZNF503
0.0085592	0.828854	0.545	0.19	1	ASDC	TAF10
0.00866103	-2.6944	0.091	0.51	1	ASDC	CD3G
0.00866334	2.67816	0.091	0.01	1	ASDC	FBXO41
0.00867536	1.14626	0.455	0.148	1	ASDC	NDUFA9
0.00868667	1.44824	0.182	0.034	1	ASDC	POMC
0.00872488	1.7832	0.182	0.035	1	ASDC	PLBD1
0.00873191	2.55232	0.091	0.01	1	ASDC	CD101
0.0087326	1.86422	0.182	0.034	1	ASDC	SASS6
0.00874439	0.759285	0.636	0.239	1	ASDC	C17orf49
0.00891572	1.12651	0.364	0.103	1	ASDC	SPTLC2
0.00893317	0.943812	0.909	0.485	1	ASDC	SPCS1
0.00899169	4.68292	0.091	0.011	1	ASDC	NIBAN2
0.00903196	2.47938	0.091	0.01	1	ASDC	AC012020.1
0.00904127	0.879628	0.909	0.623	1	ASDC	NME2
0.00904303	0.552819	0.364	0.099	1	ASDC	SUMF1
0.00904416	1.70966	0.182	0.034	1	ASDC	ANKS3
0.0090588	2.49113	0.182	0.036	1	ASDC	SRP14-AS1
0.00909472	0.754025	0.455	0.143	1	ASDC	ANTXR2
0.00909764	3.65115	0.091	0.011	1	ASDC	TMEM170B
0.00913481	3.64501	0.091	0.011	1	ASDC	STARD7-AS1
0.00914039	1.29342	0.545	0.207	1	ASDC	OIP5-AS1
0.00918543	2.19235	0.091	0.01	1	ASDC	BATF3
0.00920148	1.40398	0.727	0.3	1	ASDC	PNRC2
0.00920379	2.16378	0.091	0.01	1	ASDC	DTNA
0.0092261	2.47658	0.091	0.01	1	ASDC	RPH3AL
0.00928506	1.42347	0.182	0.034	1	ASDC	PPP1R12C
0.00930255	-6.75832	0	0.401	1	ASDC	CCL5
0.00935006	1.11256	0.273	0.064	1	ASDC	MKRN2
0.00936209	1.49123	0.273	0.067	1	ASDC	LYL1
0.00940631	2.91933	0.182	0.036	1	ASDC	AKAP1
0.00940985	2.63319	0.091	0.01	1	ASDC	CENPO
0.00941019	1.35369	0.182	0.034	1	ASDC	RP2
0.00942759	1.36057	0.182	0.034	1	ASDC	GATAD1
0.0094406	1.60438	0.182	0.034	1	ASDC	GTF2H2
0.00944335	1.50049	0.364	0.11	1	ASDC	NIPA2
0.00944454	1.69142	0.182	0.034	1	ASDC	KCTD10
0.00950851	1.00493	0.273	0.064	1	ASDC	FASTKD2
0.00953358	1.48795	0.182	0.035	1	ASDC	CLECL1
0.00956767	2.48103	0.091	0.01	1	ASDC	MAP1LC3B2
0.0096472	0.771632	0.273	0.065	1	ASDC	TAX1BP3
0.0096757	1.41841	0.364	0.11	1	ASDC	ANKRD13D
0.00974095	0.898778	0.364	0.103	1	ASDC	CMIP
0.00976151	2.48455	0.091	0.011	1	ASDC	SPATA7
0.00981375	-4.43621	0	0.397	1	ASDC	ITM2A
0.00981597	1.48665	0.455	0.143	1	ASDC	HSD17B10
0.00983451	3.80064	0.182	0.038	1	ASDC	PHTF1
0.00987946	1.29805	0.273	0.069	1	ASDC	LTC4S
0.00988898	1.33041	0.636	0.234	1	ASDC	SETX
0.0099145	-2.70226	0.273	0.609	1	ASDC	ARHGAP15
0.00993348	1.46391	0.182	0.034	1	ASDC	TCEANC2
0.00994623	1.91306	0.182	0.036	1	ASDC	ARHGAP24
0.00994941	2.45159	0.091	0.011	1	ASDC	FANCB
0.00996271	-4.56563	0	0.396	1	ASDC	BCL11B
0.00998834	-4.38841	0	0.396	1	ASDC	CD27
0	6.4625	0.981	0.018	0	B intermediate	CD79A
0	6.67317	0.991	0.039	0	B intermediate	MS4A1
0	7.21151	0.937	0.015	0	B intermediate	BANK1
0	6.23689	0.909	0.03	0	B intermediate	RALGPS2
0	4.13673	0.861	0.062	0	B intermediate	SYK
0	4.60062	0.877	0.08	0	B intermediate	CD79B
0	4.95901	0.826	0.033	0	B intermediate	ARHGAP24
0	6.48951	0.763	0.009	0	B intermediate	SPIB
0	7.84303	0.757	0.004	0	B intermediate	CD19
0	4.48469	0.76	0.044	0	B intermediate	AFF3
0	6.01779	0.726	0.015	0	B intermediate	BLK
0	4.33516	0.744	0.041	0	B intermediate	SWAP70
0	2.56692	0.795	0.095	0	B intermediate	MEF2C
0	3.98648	0.738	0.045	0	B intermediate	MARCH1
0	7.90143	0.685	0.003	0	B intermediate	TNFRSF13B
0	7.93487	0.678	0.003	0	B intermediate	FCRLA
0	7.32812	0.669	0.004	0	B intermediate	LINC00926
0	7.67209	0.666	0.003	0	B intermediate	CD24
0	6.54726	0.669	0.007	0	B intermediate	IGHM
0	2.88198	0.748	0.087	0	B intermediate	LYN
0	6.97682	0.659	0.007	0	B intermediate	OSBPL10
0	3.58081	0.694	0.057	0	B intermediate	PLCG2
0	3.85489	0.656	0.037	0	B intermediate	TCF4
0	3.90322	0.678	0.079	0	B intermediate	SMIM14
0	6.51221	0.596	0.005	0	B intermediate	IGHA1
0	5.69278	0.596	0.009	0	B intermediate	POU2AF1
0	4.71161	0.609	0.023	0	B intermediate	PDLIM1
0	3.26295	0.65	0.066	0	B intermediate	CCDC50
0	3.27712	0.621	0.04	0	B intermediate	BLNK
0	4.07135	0.587	0.032	0	B intermediate	CXXC5
0	5.74387	0.558	0.009	0	B intermediate	LINC02397
0	7.88193	0.552	0.003	0	B intermediate	EBF1
0	5.30824	0.552	0.005	0	B intermediate	IGHG2
0	3.25196	0.609	0.064	0	B intermediate	HVCN1
0	2.90698	0.584	0.042	0	B intermediate	FCGR2B
0	3.37279	0.568	0.032	0	B intermediate	NAPSA
0	3.44601	0.593	0.062	0	B intermediate	MTSS1
0	2.99691	0.584	0.056	0	B intermediate	LAT2
0	2.87598	0.568	0.047	0	B intermediate	IGKC
0	5.58107	0.514	0.009	0	B intermediate	TNFRSF13C
0	7.90488	0.505	0.002	0	B intermediate	PAX5
0	7.70232	0.505	0.003	0	B intermediate	SOX5
0	3.79067	0.536	0.035	0	B intermediate	GNG7
0	6.16863	0.502	0.006	0	B intermediate	PKIG
0	3.55517	0.53	0.036	0	B intermediate	CIITA
0	4.85249	0.502	0.017	0	B intermediate	AIM2
0	3.31888	0.53	0.047	0	B intermediate	BCAS4
0	5.01201	0.498	0.015	0	B intermediate	CDK14
0	4.58906	0.502	0.02	0	B intermediate	TFEB
0	4.73367	0.498	0.017	0	B intermediate	WDFY4
0	7.46933	0.483	0.002	0	B intermediate	FCRL1
0	6.4611	0.479	0.004	0	B intermediate	COBLL1
0	6.17894	0.476	0.005	0	B intermediate	NIBAN3
0	4.95546	0.486	0.017	0	B intermediate	PLEKHG1
0	3.34395	0.495	0.031	0	B intermediate	GAPT
0	4.00869	0.476	0.024	0	B intermediate	SCIMP
0	3.04861	0.476	0.03	0	B intermediate	BTK
0	5.11146	0.448	0.01	0	B intermediate	RUBCNL
0	3.65434	0.467	0.033	0	B intermediate	ADAM28
0	4.56447	0.442	0.013	0	B intermediate	CD40
0	4.1334	0.448	0.02	0	B intermediate	FGD2
0	6.18278	0.432	0.006	0	B intermediate	TLR10
0	5.23778	0.429	0.007	0	B intermediate	RHEX
0	8.53821	0.416	0.001	0	B intermediate	FCRL2
0	5.00339	0.423	0.009	0	B intermediate	BCL11A
0	3.42894	0.445	0.033	0	B intermediate	CLECL1
0	7.7917	0.41	0.001	0	B intermediate	COPDA1
0	5.84368	0.407	0.005	0	B intermediate	DENND5B
0	1.89716	0.407	0.03	0	B intermediate	IGHG1
0	5.57989	0.379	0.006	0	B intermediate	HLA-DOB
0	3.66664	0.391	0.021	0	B intermediate	TBC1D9
0	2.75181	0.379	0.016	0	B intermediate	JCHAIN
0	8.23017	0.363	0.001	0	B intermediate	LINC01857
0	4.99004	0.366	0.011	0	B intermediate	SETBP1
0	2.5935	0.372	0.02	0	B intermediate	CD1C
0	4.58715	0.36	0.012	0	B intermediate	CD180
0	7.46045	0.344	0.002	0	B intermediate	CD22
0	4.49935	0.347	0.014	0	B intermediate	PIP5K1B
0	4.31191	0.35	0.018	0	B intermediate	SEMA4B
0	6.60739	0.334	0.003	0	B intermediate	VPREB3
0	6.54127	0.331	0.005	0	B intermediate	FAM30A
0	3.78852	0.341	0.017	0	B intermediate	HHEX
0	5.06689	0.331	0.007	0	B intermediate	SIGLEC10
0	6.45225	0.322	0.004	0	B intermediate	AL355076.2
0	3.947	0.328	0.013	0	B intermediate	DOK3
0	4.77465	0.309	0.01	0	B intermediate	CNR2
0	6.24431	0.3	0.003	0	B intermediate	CPNE5
0	4.3144	0.303	0.011	0	B intermediate	TLE1
0	6.44119	0.293	0.002	0	B intermediate	PNOC
0	6.63041	0.293	0.003	0	B intermediate	ANGPTL1
0	4.17279	0.303	0.013	0	B intermediate	USP6NL
0	6.89232	0.287	0.002	0	B intermediate	IGHV5-78
0	5.37157	0.284	0.005	0	B intermediate	ZBTB32
0	3.80189	0.29	0.016	0	B intermediate	TFEC
0	4.5691	0.274	0.006	0	B intermediate	IGHG3
0	4.01574	0.278	0.011	0	B intermediate	SSPN
0	4.24648	0.274	0.012	0	B intermediate	IL7
0	4.6254	0.265	0.008	0	B intermediate	TLR9
0	4.4555	0.265	0.009	0	B intermediate	PHACTR1
0	6.80015	0.259	0.003	0	B intermediate	PPP1R14A
0	3.79211	0.268	0.013	0	B intermediate	SYNGR1
0	4.23635	0.259	0.008	0	B intermediate	DERL3
0	7.53587	0.249	0.001	0	B intermediate	ZNF860
0	5.30988	0.252	0.007	0	B intermediate	KHDRBS2
0	4.66674	0.252	0.008	0	B intermediate	AC008691.1
0	5.52284	0.249	0.005	0	B intermediate	CLEC17A
0	7.24657	0.243	0.001	0	B intermediate	BACE2
0	7.29878	0.243	0.001	0	B intermediate	FCRL5
0	3.3652	0.243	0.003	0	B intermediate	IGLC3
0	7.69434	0.237	0.001	0	B intermediate	KLK1
0	4.79999	0.237	0.006	0	B intermediate	SNX22
0	4.48987	0.215	0.007	0	B intermediate	EHD3
0	7.45889	0.186	0.001	0	B intermediate	COL19A1
0	6.48463	0.183	0.001	0	B intermediate	AC104699.1
0	6.41047	0.18	0.002	0	B intermediate	TSBP1-AS1
0	4.64382	0.177	0.005	0	B intermediate	LARGE1
0	7.1454	0.17	0.001	0	B intermediate	IGHD
0	6.09269	0.167	0.002	0	B intermediate	SIGLEC6
0	4.00795	0.167	0.004	0	B intermediate	IGLC2
0	7.59446	0.161	0.001	0	B intermediate	UTS2B
0	5.32649	0.161	0.003	0	B intermediate	COL4A4
0	7.76543	0.151	0.001	0	B intermediate	SYT1
0	6.0907	0.132	0.002	0	B intermediate	FCER2
0	6.39786	0.129	0.001	0	B intermediate	COL4A3
0	6.7374	0.123	0.001	0	B intermediate	PLPP3
0	3.73035	0.123	0.002	0	B intermediate	IGHV5-51
0	6.48603	0.12	0.001	0	B intermediate	GUCY2C
0	5.48553	0.117	0.002	0	B intermediate	LY86-AS1
0	7.18829	0.114	0.001	0	B intermediate	KLHL14
0	9.7134	0.104	0	0	B intermediate	OSTN-AS1
0	6.01833	0.104	0.001	0	B intermediate	COL9A3
0	5.80581	0.101	0.002	0	B intermediate	JADE3
0	5.55996	0.098	0.001	0	B intermediate	AC083837.1
0	5.902	0.098	0.001	0	B intermediate	C12orf74
0	6.8681	0.095	0	0	B intermediate	GPM6A
0	7.37968	0.085	0	0	B intermediate	LINC02202
0	7.96225	0.085	0	0	B intermediate	HRK
0	6.34267	0.085	0.001	0	B intermediate	IGHA2
0	5.8504	0.082	0.001	0	B intermediate	PKHD1L1
0	6.49511	0.079	0.001	0	B intermediate	UGT8
0	6.21655	0.076	0.001	0	B intermediate	NXPH4
0	5.78407	0.073	0.001	0	B intermediate	DEGS2
0	8.51775	0.069	0	0	B intermediate	WNT16
0	7.05681	0.066	0	0	B intermediate	BEND4
0	5.28	0.066	0	0	B intermediate	IGHV3-33
0	7.13019	0.066	0.001	0	B intermediate	AC021678.2
0	7.71089	0.063	0	0	B intermediate	ZBED2
0	6.87591	0.06	0	0	B intermediate	AP002075.1
0	7.06745	0.06	0	0	B intermediate	CNR1
0	10.9229	0.06	0	0	B intermediate	AC007368.1
0	6.87425	0.057	0	0	B intermediate	AC246787.2
0	7.38678	0.057	0	0	B intermediate	SYNPO
0	8.82191	0.057	0	0	B intermediate	IGKV2-29
0	7.79977	0.054	0	0	B intermediate	GALNTL6
0	6.7647	0.054	0	0	B intermediate	LINC01754
0	9.53292	0.054	0	0	B intermediate	LINC02541
0	6.60905	0.054	0	0	B intermediate	AL161781.2
0	8.65472	0.05	0	0	B intermediate	IGHV3-15
0	7.69158	0.05	0	0	B intermediate	FCRL4
0	6.95122	0.047	0	0	B intermediate	ALPL
0	8.07371	0.044	0	0	B intermediate	LINC02324
0	6.93947	0.044	0	0	B intermediate	OSTN
0	9.20773	0.038	0	0	B intermediate	HES1
0	8.16719	0.032	0	0	B intermediate	SOX7
0	8.3259	0.028	0	0	B intermediate	KREMEN2
0	12.7318	0.022	0	0	B intermediate	IGLC7
3.32344210298764e-306	4.47104	0.139	0.004	7.82537677569469e-302	B intermediate	TSPAN13
2.59157570734943e-300	2.67086	0.284	0.015	6.10212416052497e-296	B intermediate	MZB1
1.28733826266123e-295	3.51991	0.265	0.014	3.03116667326214e-291	B intermediate	TNS3
7.2288942288266e-295	6.49036	0.057	0.001	1.70211543511951e-290	B intermediate	LAMC1
5.30505194702503e-293	3.09104	0.527	0.054	1.24912753144651e-288	B intermediate	TSPAN3
5.776144301972e-292	6.70799	0.05	0	1.36005093734233e-287	B intermediate	TAS1R3
7.88267949299291e-287	3.42123	0.325	0.021	1.85605571342011e-282	B intermediate	LRRK1
2.63906945199958e-282	2.70747	0.527	0.054	6.21395293167822e-278	B intermediate	HDAC9
1.36738240707255e-280	2.79664	0.385	0.03	3.21963861569303e-276	B intermediate	IRF8
7.51620253817281e-280	2.08528	0.934	0.168	1.76976504963817e-275	B intermediate	HLA-DQA1
4.87405799430185e-276	2.79767	0.388	0.031	1.14764569533831e-271	B intermediate	BASP1
1.59843605847042e-271	3.27415	0.315	0.021	3.76367754327444e-267	B intermediate	LILRB1
1.26115011087809e-265	7.35126	0.035	0	2.96950405107355e-261	B intermediate	LINC00494
7.89703895980364e-265	4.29743	0.215	0.01	1.85943679347537e-260	B intermediate	LINC02422
9.43718265409822e-263	3.80876	0.183	0.007	2.22207902773397e-258	B intermediate	WDR34
3.37289147521643e-261	4.58162	0.126	0.003	7.9418102675446e-257	B intermediate	FAM177B
6.53039502003972e-255	11.6225	0.016	0	1.53764681141855e-250	B intermediate	IL6
3.35966170149519e-254	4.546	0.17	0.007	7.91065944234057e-250	B intermediate	TEX9
4.72467362563206e-254	5.42508	0.098	0.002	1.11247165189132e-249	B intermediate	LCN10
2.16809438910999e-253	4.36477	0.101	0.002	5.10499504859839e-249	B intermediate	TNFRSF17
2.35008790069721e-252	6.61923	0.044	0	5.53351697098166e-248	B intermediate	CYB5R2
3.17524862379348e-251	6.14731	0.05	0	7.47644040958412e-247	B intermediate	ZNF608
8.48124820875008e-250	3.09392	0.467	0.049	1.99699470323229e-245	B intermediate	PALM2-AKAP2
5.96912671229595e-249	7.9785	0.022	0	1.4054905756772e-244	B intermediate	IL12B
1.93342757369893e-246	5.2436	0.079	0.001	4.55244856503151e-242	B intermediate	AL133467.1
3.38845484959783e-246	2.96056	0.779	0.148	7.97845578886306e-242	B intermediate	POU2F2
4.90608316908119e-246	3.82934	0.215	0.011	1.15518634299186e-241	B intermediate	SOWAHD
1.72287843746741e-244	5.00095	0.082	0.001	4.05668956886075e-240	B intermediate	AC099524.1
1.16913950746682e-241	2.03644	0.789	0.133	2.75285588428139e-237	B intermediate	IFI30
6.39959068285346e-241	3.39487	0.306	0.022	1.50684762218468e-236	B intermediate	TRIO
8.48105694021271e-240	3.04185	0.517	0.062	1.99694966714248e-235	B intermediate	HSH2D
1.08236012531808e-239	3.9711	0.189	0.009	2.54852515107396e-235	B intermediate	AC120193.1
1.19653491398503e-238	3.27673	0.599	0.086	2.81736110846916e-234	B intermediate	ACP5
2.90490217409336e-235	3.45499	0.394	0.037	6.83988265912022e-231	B intermediate	P2RX5
8.67300084930367e-235	6.73494	0.047	0	2.04214477997704e-230	B intermediate	AC012236.1
8.42382278542943e-230	5.59999	0.047	0	1.98347331305721e-225	B intermediate	PRKD1
3.49222055529021e-229	3.53727	0.11	0.003	8.22278251948633e-225	B intermediate	IGHG4
5.48910309784179e-229	8.99927	0.019	0	1.29246421541783e-224	B intermediate	ESPNL
1.09284916818316e-227	7.02286	0.028	0	2.57322265140408e-223	B intermediate	AC080129.1
3.51740144397639e-227	6.19612	0.057	0.001	8.28207343998681e-223	B intermediate	CR2
6.30184381781719e-226	6.99949	0.035	0	1.48383214534324e-221	B intermediate	BTN1A1
2.1804019324403e-222	3.62364	0.205	0.011	5.13397439012394e-218	B intermediate	CBFA2T3
3.4549318860803e-222	2.92013	0.521	0.067	8.13498261896467e-218	B intermediate	CYB561A3
1.01636821750665e-220	4.00819	0.101	0.003	2.39314060494117e-216	B intermediate	IGHV3-23
2.33063538054601e-220	4.32869	0.123	0.004	5.48771406703362e-216	B intermediate	AC017104.1
3.66401033448977e-219	2.59353	0.64	0.101	8.62727873358961e-215	B intermediate	STX7
5.88121675075659e-219	1.92198	0.943	0.224	1.38479129613315e-214	B intermediate	HLA-DQB1
7.40559184693301e-219	2.15291	0.937	0.227	1.74372065627885e-214	B intermediate	HLA-DRB5
1.45445736835689e-217	3.1932	0.353	0.032	3.42466531953312e-213	B intermediate	CD70
2.47313493461845e-216	3.74592	0.192	0.01	5.82324351705259e-212	B intermediate	KMO
1.09854230118012e-213	4.08705	0.132	0.005	2.58662770235871e-209	B intermediate	SEMA7A
1.92963692363304e-212	3.63865	0.23	0.014	4.54352310038635e-208	B intermediate	CDCA7L
2.05011275264628e-212	9.07593	0.016	0	4.82719548738094e-208	B intermediate	IGLC6
5.30319949616822e-212	3.08914	0.328	0.029	1.24869135336777e-207	B intermediate	FAM49A
8.24363160401829e-212	5.71135	0.057	0.001	1.94104549748215e-207	B intermediate	SCX
2.71506465737375e-210	7.07336	0.032	0	6.39289124225223e-206	B intermediate	RAB3C
2.82881294576807e-210	2.79628	0.521	0.071	6.66072296210549e-206	B intermediate	HLA-DQA2
6.70086622156132e-210	2.88531	0.505	0.066	1.57778596052883e-205	B intermediate	PXK
1.64876051896259e-209	2.58741	0.341	0.031	3.88217151794932e-205	B intermediate	HLA-DOA
9.4397002971518e-209	3.14975	0.297	0.024	2.22267183196736e-204	B intermediate	METTL7A
1.00512979411051e-205	4.26301	0.132	0.005	2.36667861321261e-201	B intermediate	BEND5
6.27834999858702e-205	2.75564	0.808	0.191	1.4783002906673e-200	B intermediate	CD82
2.98901756650196e-204	2.90328	0.461	0.057	7.03794076208552e-200	B intermediate	DAPP1
3.38264386647479e-204	2.34855	0.584	0.087	7.96477324800153e-200	B intermediate	IFNGR2
1.25032262185432e-202	6.95997	0.025	0	2.94400964541818e-198	B intermediate	AC068898.1
3.64899661343212e-202	3.64286	0.17	0.008	8.59192742598728e-198	B intermediate	SH2B2
4.84150438328382e-202	2.0741	0.435	0.05	1.13998062208801e-197	B intermediate	PLD4
5.25449490554155e-202	3.30867	0.287	0.023	1.23722337045881e-197	B intermediate	CXCR5
8.42053217738186e-202	7.35243	0.032	0	1.98269850648633e-197	B intermediate	AL031666.3
6.90813557834755e-200	3.68059	0.24	0.017	1.62658960327771e-195	B intermediate	CD72
2.43604410680492e-199	2.627	0.391	0.042	5.73590945388287e-195	B intermediate	PIK3AP1
2.88327147366416e-198	2.98915	0.347	0.033	6.78895101188962e-194	B intermediate	ZNF296
5.77164113802783e-197	5.11724	0.041	0	1.35899062236003e-192	B intermediate	IGHV3-20
1.0204706645044e-196	5.89535	0.054	0.001	2.40280022664206e-192	B intermediate	AC022239.1
1.18772308985134e-196	1.99541	0.987	0.299	2.79661278736396e-192	B intermediate	HLA-DRA
1.73635372021329e-196	4.6664	0.12	0.004	4.08841846961421e-192	B intermediate	CLMN
1.96148263881734e-196	6.34494	0.035	0	4.61850702135931e-192	B intermediate	LCN8
3.60668592691048e-194	3.87526	0.126	0.005	8.4923026835034e-190	B intermediate	CRACR2B
2.45442051228201e-193	4.82652	0.098	0.003	5.77917853821921e-189	B intermediate	GRAMD1C
4.25711665615058e-192	6.11258	0.044	0.001	1.00238068785721e-187	B intermediate	AC025569.1
5.36333184086082e-192	2.59881	0.315	0.029	1.26285011524909e-187	B intermediate	KYNU
2.3530886197644e-191	4.40091	0.082	0.002	5.54058246409725e-187	B intermediate	MACC1
9.39036902750786e-189	2.70365	0.479	0.066	2.211056291217e-184	B intermediate	LYL1
1.17473386789089e-186	3.25776	0.199	0.012	2.76602836533588e-182	B intermediate	RASGRP3
6.33744386477406e-186	2.08564	0.533	0.077	1.4922145323997e-181	B intermediate	LY86
1.61974410396361e-185	4.05783	0.161	0.008	3.81384946719271e-181	B intermediate	RHOBTB2
9.3832513616194e-185	3.02993	0.315	0.03	2.2093803656069e-180	B intermediate	DUS2
1.14898811975746e-184	1.84668	0.637	0.106	2.70540742678092e-180	B intermediate	HLA-DMB
2.5368327958282e-184	2.63089	0.536	0.082	5.97322650105707e-180	B intermediate	ORAI2
6.40950969002902e-184	2.6415	0.461	0.062	1.50918315161423e-179	B intermediate	ALOX5
7.7703703369548e-184	3.93075	0.174	0.01	1.82961139953938e-179	B intermediate	SLC2A6
9.7099293143796e-184	2.92099	0.353	0.038	2.28629995636382e-179	B intermediate	CD83
3.55397382249735e-182	3.19474	0.199	0.012	8.36818676245227e-178	B intermediate	INKA1
4.61159353066138e-182	9.61595	0.016	0	1.08584581272953e-177	B intermediate	CD5L
4.65332716983338e-182	8.92275	0.016	0	1.09567241540897e-177	B intermediate	ARL14
7.75757965794678e-182	3.1113	0.256	0.02	1.82659970626015e-177	B intermediate	RAB30
1.78987407553944e-179	4.81027	0.085	0.002	4.21443749826517e-175	B intermediate	LINC01781
6.58736289196378e-179	7.44806	0.035	0	1.55106046654179e-174	B intermediate	AC019197.1
8.21876440133795e-179	2.46822	0.7	0.146	1.93519026593903e-174	B intermediate	FCHSD2
9.97691376891511e-179	2.54441	0.625	0.115	2.34916411602875e-174	B intermediate	TPD52
5.36093124958952e-178	3.26035	0.218	0.015	1.26228487202835e-173	B intermediate	SCRN1
6.6173918051583e-178	3.76363	0.186	0.011	1.55813107444257e-173	B intermediate	IFNLR1
4.09082634145959e-175	2.56467	0.539	0.087	9.63225970360076e-171	B intermediate	GGA2
8.09634563855967e-175	3.02968	0.249	0.02	1.90636554405526e-170	B intermediate	LRRK2
8.4434045374132e-175	1.78187	0.839	0.19	1.98808403237931e-170	B intermediate	HLA-DMA
1.18646038432254e-174	2.79203	0.442	0.06	2.79363962092585e-170	B intermediate	IFT57
1.08146153312397e-173	7.36776	0.032	0	2.54640932589369e-169	B intermediate	NTNG1
1.24727082847805e-173	6.10207	0.032	0	2.93682389273441e-169	B intermediate	MIR3945HG
9.44140223206614e-173	3.64796	0.139	0.006	2.22307256956229e-168	B intermediate	CNFN
2.68561127179907e-170	2.02453	0.991	0.747	6.32354030057808e-166	B intermediate	CD37
6.73950148230773e-169	4.88722	0.085	0.002	1.58688301902418e-164	B intermediate	ST14
7.33319048926736e-169	5.63938	0.041	0.001	1.72667303260289e-164	B intermediate	AL139042.1
3.05700653709736e-168	2.50289	0.287	0.027	7.19802759224944e-164	B intermediate	MPEG1
5.2154056254911e-164	2.72685	0.41	0.054	1.22801940857813e-159	B intermediate	SIPA1L3
1.49480656764974e-163	9.80905	0.013	0	3.51967154418808e-159	B intermediate	AC022509.5
1.5176204598937e-163	9.22435	0.013	0	3.5733891348657e-159	B intermediate	CCDC187
1.52530210070216e-163	8.28176	0.013	0	3.59147632631331e-159	B intermediate	TMEM74B
1.16587189690747e-161	2.60514	0.429	0.06	2.74516196845832e-157	B intermediate	STRBP
4.74187760360724e-158	3.17925	0.246	0.022	1.11652250054536e-153	B intermediate	GRK3
1.16954792841992e-157	3.79076	0.161	0.01	2.75381755225755e-153	B intermediate	LINC02812
4.77144533263648e-157	3.45836	0.151	0.008	1.12348451802259e-152	B intermediate	MEF2C-AS1
6.82324555141046e-157	2.38089	0.653	0.142	1.60660139753511e-152	B intermediate	SMARCB1
2.21009961283417e-154	2.40083	0.063	0.001	5.20390054837934e-150	B intermediate	IGKV1-16
2.89281111890636e-153	2.15798	0.77	0.2	6.81141306057692e-149	B intermediate	SNX2
6.65523240626208e-153	5.15608	0.047	0.001	1.56704102237847e-148	B intermediate	GNG11
1.43220639329772e-152	2.63301	0.423	0.061	3.37227317365881e-148	B intermediate	SYVN1
1.70635961518426e-152	8.7749	0.019	0	4.01779434991286e-148	B intermediate	IGHV3-49
2.46145328241938e-152	4.03073	0.123	0.006	5.79573789878468e-148	B intermediate	E2F5
3.79595457072989e-152	4.98615	0.069	0.002	8.93795463224059e-148	B intermediate	PRICKLE1
1.45070692906979e-151	2.44948	0.738	0.193	3.41583453518774e-147	B intermediate	SP140
3.41628300214025e-151	6.57502	0.028	0	8.04397995683944e-147	B intermediate	AC104024.1
5.9077674709161e-151	1.86484	0.65	0.133	1.39104292870191e-146	B intermediate	CTSH
7.80143922763734e-150	3.54258	0.177	0.012	1.83692688053949e-145	B intermediate	STAP1
9.32922875726932e-150	2.86687	0.347	0.043	2.19666020318663e-145	B intermediate	RIPOR1
8.69446827142697e-149	1.46725	0.984	0.349	2.04719949919019e-144	B intermediate	HLA-DRB1
6.55077458176097e-148	2.37048	0.631	0.138	1.54244538302144e-143	B intermediate	TMEM154
9.5634528052875e-148	5.90442	0.041	0.001	2.25181059753299e-143	B intermediate	MOXD1
3.32152719981087e-147	3.54753	0.161	0.01	7.82086794467468e-143	B intermediate	CD1D
1.59484857498817e-144	1.90984	0.533	0.095	3.75523045466715e-140	B intermediate	ZEB2
4.60397302828116e-144	3.5085	0.164	0.011	1.08405148923908e-139	B intermediate	CLIP2
7.99515611475004e-143	2.10673	0.997	0.76	1.88253945877905e-138	B intermediate	CD74
3.04439943776663e-142	2.65804	0.347	0.045	7.1683429161653e-138	B intermediate	ZDHHC21
1.02588264779997e-141	2.8266	0.293	0.033	2.41554328250981e-137	B intermediate	EAF2
1.51835646997729e-141	2.93016	0.353	0.047	3.57512214420853e-137	B intermediate	QRSL1
9.22922222159951e-140	1.0605	0.53	0.09	2.17311266429782e-135	B intermediate	CYBB
5.63730911755097e-139	2.0651	0.83	0.273	1.32736080481855e-134	B intermediate	NCF1
1.00725312326795e-138	2.71093	0.208	0.018	2.37167820404671e-134	B intermediate	CLIC4
6.26776379901047e-138	9.1009	0.022	0	1.47580766411501e-133	B intermediate	IGHV3-53
7.32776051010339e-138	5.72095	0.022	0	1.72539448970894e-133	B intermediate	WSCD2
1.21206357198941e-137	3.61023	0.142	0.008	2.85392488660627e-133	B intermediate	ADAMTS6
4.88314153335126e-137	2.5495	0.426	0.067	1.14978450544289e-132	B intermediate	LRMP
2.43969283920096e-136	8.55001	0.013	0	5.74450075918258e-132	B intermediate	AC023202.1
2.44997110835203e-136	9.01959	0.013	0	5.76870197172568e-132	B intermediate	IGLV5-45
3.71891864216256e-136	2.44997	0.388	0.057	8.75656583483597e-132	B intermediate	CYSLTR1
4.2814181028102e-135	6.50261	0.066	0.002	1.00810270648769e-130	B intermediate	IGHV3-21
6.15555318298002e-135	5.54869	0.044	0.001	1.44938655246448e-130	B intermediate	FA2H
6.30364474155128e-133	1.42709	0.975	0.419	1.48425619084567e-128	B intermediate	HLA-DPA1
9.13071152209705e-133	2.92484	0.079	0.003	2.14991733499297e-128	B intermediate	IGLV1-47
2.67805815664927e-132	3.29263	0.101	0.005	6.30575573564636e-128	B intermediate	IGHV3-30
6.00667666830771e-132	2.00578	0.587	0.124	1.41433208831973e-127	B intermediate	NCF4
4.30794013830285e-130	4.09592	0.114	0.006	1.01434758496479e-125	B intermediate	AEBP1
4.55292101211978e-130	0.759704	0.625	0.119	1.07203078151372e-125	B intermediate	SPI1
8.22196829485251e-128	2.68781	0.287	0.034	1.93594465470597e-123	B intermediate	MICAL3
2.88158821988102e-126	1.35439	0.987	0.42	6.78498762253184e-122	B intermediate	HLA-DPB1
8.95378523567403e-126	5.41698	0.038	0.001	2.10825827159181e-121	B intermediate	TEAD2
2.37152613630023e-125	2.66636	0.259	0.029	5.58399544053252e-121	B intermediate	ADGRG5
8.14897662806951e-125	3.3083	0.114	0.006	1.91875803684525e-120	B intermediate	LINC00996
1.55122140720291e-124	2.13061	0.817	0.272	3.65250592539996e-120	B intermediate	BTG2
4.00594404220596e-124	4.0902	0.107	0.005	9.43239584177815e-120	B intermediate	PTPRK
5.18122127916997e-124	7.19482	0.022	0	1.21997036239336e-119	B intermediate	IGHV3-66
1.94696362930325e-123	3.24891	0.189	0.016	4.58432056155744e-119	B intermediate	PTK2
2.74895018495385e-123	2.32248	0.413	0.069	6.47267810549233e-119	B intermediate	PLEKHF2
6.51519979412293e-123	2.49898	0.237	0.025	1.53406894352418e-118	B intermediate	SNX8
3.07431985591769e-122	4.14377	0.126	0.008	7.23879353274379e-118	B intermediate	AL592429.2
5.53445714802227e-122	2.22808	0.341	0.049	1.30314328007332e-117	B intermediate	UBE2E2
2.45782169689792e-120	4.08361	0.076	0.003	5.78718696751585e-116	B intermediate	ABCB4
7.76227918143502e-120	2.58928	0.306	0.041	1.82770625606069e-115	B intermediate	TMEM273
1.69677603779856e-119	6.16469	0.025	0	3.99522885860048e-115	B intermediate	SGCA
3.22246670809584e-119	3.17035	0.161	0.012	7.58762011088246e-115	B intermediate	MOB3B
2.82617997908184e-117	2.03529	0.672	0.181	6.6545233787461e-113	B intermediate	NCOA3
5.71868410565208e-117	2.85277	0.24	0.027	1.34652135951684e-112	B intermediate	FAM43A
6.73718849030027e-117	7.13938	0.013	0	1.5863384019261e-112	B intermediate	IGHV7-4-1
1.08985201504115e-116	2.78786	0.262	0.031	2.56616555461588e-112	B intermediate	FCRL3
1.45131245813072e-116	4.22974	0.098	0.005	3.4172603139146e-112	B intermediate	TTC21A
3.15601040204126e-116	6.73769	0.028	0	7.43114209264634e-112	B intermediate	LINC01800
7.3743650210699e-116	2.4812	0.565	0.132	1.73636798786112e-111	B intermediate	ID3
4.15599769462814e-115	2.2684	0.476	0.095	9.78571217177143e-111	B intermediate	SMC6
7.12324360053061e-115	4.27004	0.063	0.002	1.67723893818094e-110	B intermediate	DOK7
8.08862953212143e-115	2.2417	0.479	0.096	1.90454870963331e-110	B intermediate	CSGALNACT1
3.28083169174358e-114	6.35327	0.019	0	7.72504630137943e-110	B intermediate	AC111006.1
5.24984223153718e-111	1.84966	0.511	0.107	1.23612785183775e-106	B intermediate	SKAP2
8.66097571171862e-111	3.227	0.129	0.009	2.03931334108127e-106	B intermediate	ZNF532
8.9080780408001e-111	2.45165	0.192	0.018	2.09749605548679e-106	B intermediate	CPED1
7.61199028858805e-110	5.13301	0.038	0.001	1.79231923335094e-105	B intermediate	HORMAD2-AS1
5.01920525624424e-109	-7.12294	0.013	0.719	1.18182206963527e-104	B intermediate	CD3E
1.00067223387636e-108	7.15524	0.032	0	2.35618284188529e-104	B intermediate	IGHV3-74
4.27426138082802e-108	-6.52904	0.06	0.73	1.00641758472977e-103	B intermediate	IL32
1.94249954751504e-107	2.36164	0.435	0.086	4.5738094345789e-103	B intermediate	SKIL
1.30052419763481e-106	2.10694	0.492	0.106	3.06221427575093e-102	B intermediate	PARP15
1.65932268570866e-106	5.08335	0.038	0.001	3.90704119576962e-102	B intermediate	LINC02413
3.82587362248238e-106	7.47292	0.016	0	9.00840203149702e-102	B intermediate	AC103831.1
3.91711563451953e-106	7.58542	0.016	0	9.22324047303968e-102	B intermediate	AC097717.1
1.70265760497476e-104	1.85671	0.795	0.277	4.00907759667357e-100	B intermediate	SP110
1.90777815923617e-104	3.95583	0.104	0.006	4.49205445373749e-100	B intermediate	PAWR
2.6012340180237e-104	5.21476	0.041	0.001	6.1248656188386e-100	B intermediate	FBLN2
6.46612192134003e-104	6.31738	0.025	0	1.52251306759872e-99	B intermediate	HTR3A
1.76126420691258e-103	1.72954	0.826	0.313	4.14707270159637e-99	B intermediate	SYNGR2
1.97113712879805e-103	3.51181	0.104	0.006	4.64123948346788e-99	B intermediate	VAV2
3.73161558482789e-103	5.77895	0.022	0	8.78646205603574e-99	B intermediate	GALNT14
6.01010561075317e-103	2.93426	0.24	0.03	1.41513946710794e-98	B intermediate	HIP1R
6.39815365475608e-103	3.37971	0.076	0.003	1.50650925954887e-98	B intermediate	DNAH8
9.53209121747193e-103	2.96994	0.186	0.019	2.24442619806594e-98	B intermediate	SLC9A7
1.79807967975911e-102	1.70157	0.334	0.053	4.2337584139608e-98	B intermediate	HCK
2.58057981410765e-102	8.02766	0.013	0	6.07623323029787e-98	B intermediate	SMIM41
3.38077962877481e-102	1.19852	0.382	0.065	7.96038371391317e-98	B intermediate	MARCKS
6.64632236668479e-102	4.16465	0.032	0.001	1.5649430644596e-97	B intermediate	IGLV3-21
7.37267668077648e-102	1.8596	0.634	0.176	1.73597045125563e-97	B intermediate	UVRAG
2.16862663440062e-101	4.48171	0.05	0.001	5.10624827335971e-97	B intermediate	ARHGAP42
5.29711492962574e-101	2.02279	0.448	0.093	1.24725868132968e-96	B intermediate	TMEM156
6.8547969697631e-101	1.49173	0.278	0.038	1.61403049450042e-96	B intermediate	HMOX1
7.41428929865056e-101	2.19151	0.344	0.057	1.74576855826026e-96	B intermediate	RHBDF2
1.19750959539624e-100	2.73516	0.161	0.014	2.81965609331999e-96	B intermediate	CXorf21
1.83690268314553e-100	7.67981	0.041	0.001	4.32517105773447e-96	B intermediate	IGLV2-23
1.88258456797669e-100	1.32493	0.11	0.007	4.43273362375792e-96	B intermediate	IGHV3-7
5.40833466800799e-99	3.84715	0.057	0.002	1.27344648092916e-94	B intermediate	PTPRG
4.44570340066878e-98	1.60813	0.426	0.084	1.04678532272147e-93	B intermediate	CTSZ
5.91793214253741e-98	-6.21769	0.032	0.685	1.39343630228186e-93	B intermediate	FYB1
9.76587945688743e-98	4.62538	0.032	0.001	2.29947397691871e-93	B intermediate	IGLV10-54
1.04178865994146e-97	4.14546	0.091	0.005	2.45299557869816e-93	B intermediate	TMEM163
1.80742193192612e-97	3.15052	0.132	0.01	4.25575568091324e-93	B intermediate	AP1S3
3.88641286610565e-96	2.03081	0.726	0.261	9.15094773453237e-92	B intermediate	VOPP1
2.21071718418801e-95	3.67795	0.035	0.001	5.20535468188908e-91	B intermediate	AC233755.2
8.75977444166065e-95	4.83369	0.038	0.001	2.06257649003342e-90	B intermediate	LINC01679
2.94770630601086e-94	5.45557	0.028	0	6.94066926813316e-90	B intermediate	AC020914.1
3.97982139124538e-94	-6.33483	0.016	0.666	9.37088744782637e-90	B intermediate	GIMAP7
2.33402505642427e-93	5.4857	0.041	0.001	5.49569539785658e-89	B intermediate	KCNH8
2.37752022603698e-93	2.37307	0.274	0.041	5.59810912422667e-89	B intermediate	RABEP2
1.25623476919124e-92	3.41742	0.069	0.003	2.9579303875377e-88	B intermediate	NEXMIF
2.08543142750748e-92	2.80501	0.199	0.023	4.91035683920912e-88	B intermediate	TRAF4
2.66022880580614e-91	1.83293	0.401	0.08	6.26377474615114e-87	B intermediate	MCM5
3.26303571267595e-91	2.47517	0.208	0.025	7.68314388906678e-87	B intermediate	BTN2A2
5.85853113855668e-91	7.06519	0.016	0	1.37944974188456e-86	B intermediate	IGLVI-70
6.0047911777331e-91	7.0537	0.016	0	1.41388813070904e-86	B intermediate	TAL2
6.43020501830151e-90	2.05247	0.429	0.094	1.51405607360927e-85	B intermediate	SEL1L3
1.75757083858548e-89	1.32393	0.568	0.146	4.13837629653338e-85	B intermediate	GRN
2.32547484488798e-89	1.67056	0.461	0.104	5.47556306977325e-85	B intermediate	SNX10
2.79904287402365e-89	5.21419	0.025	0	6.59062635117609e-85	B intermediate	IGKV1D-13
6.70487437357167e-89	1.46574	0.599	0.163	1.57872972000118e-84	B intermediate	MEF2A
9.62661070097029e-89	2.02262	0.334	0.06	2.26668175565046e-84	B intermediate	UNC93B1
1.40154174821927e-88	2.26049	0.382	0.077	3.3000702003571e-84	B intermediate	CHPT1
4.37501197557788e-88	2.1976	0.227	0.03	1.03014031976957e-83	B intermediate	DENND3
1.46924759344466e-87	1.70747	0.58	0.162	3.45949038352481e-83	B intermediate	REL
2.93698611690053e-87	4.93615	0.041	0.001	6.91542751085399e-83	B intermediate	TGM2
2.99950362424895e-87	2.74186	0.129	0.011	7.06263123365659e-83	B intermediate	TSPAN33
6.98749685785354e-87	6.48409	0.019	0	1.64527601015019e-82	B intermediate	NRCAM
7.21112221371116e-87	1.72496	0.795	0.348	1.69793083644043e-82	B intermediate	POLD4
8.59770907829794e-87	4.99915	0.035	0.001	2.02441657957603e-82	B intermediate	RASGRF1
2.60734670596675e-86	2.70692	0.224	0.03	6.13925855386932e-82	B intermediate	C16orf74
3.27281744137174e-86	3.33617	0.085	0.005	7.7061759474539e-82	B intermediate	DGKG
1.39586236427566e-85	2.78382	0.136	0.012	3.28669752292347e-81	B intermediate	ARL11
1.88435039837205e-85	2.66199	0.249	0.037	4.43689144800683e-81	B intermediate	PRKCE
2.0564857575461e-85	1.82125	0.53	0.138	4.84220136471805e-81	B intermediate	ODC1
7.2382868131564e-85	6.50282	0.016	0	1.70432701302581e-80	B intermediate	AC018445.5
8.04314337310324e-85	2.39375	0.246	0.037	1.89383853863089e-80	B intermediate	GM2A
9.38176547874727e-85	1.6905	0.666	0.22	2.20903049962583e-80	B intermediate	SYPL1
3.18450767237985e-84	4.99306	0.028	0.001	7.4982417653856e-80	B intermediate	MARC2
7.31354313303155e-84	2.08792	0.388	0.082	1.72204686610361e-79	B intermediate	NOTCH2
1.77576446096472e-83	1.42925	0.208	0.027	4.18121499978753e-79	B intermediate	BHLHE41
2.56987842373088e-82	1.98272	0.022	0	6.05103573651674e-78	B intermediate	IGKV2D-28
6.90320275065247e-82	7.05207	0.013	0	1.62542811966863e-77	B intermediate	AC119674.1
7.14797206754027e-82	-7.97723	0.003	0.606	1.68306150302303e-77	B intermediate	CD2
7.34813347350041e-82	3.92767	0.066	0.003	1.73019150767041e-77	B intermediate	AC107884.1
2.4655896960881e-81	-10.4279	0	0.6	5.80547749840904e-77	B intermediate	CD3D
5.92046531021462e-81	2.19909	0.322	0.061	1.39403276194314e-76	B intermediate	CERS4
4.80617660885031e-80	3.691	0.06	0.003	1.13166234431989e-75	B intermediate	MRVI1-AS1
8.11091487126384e-80	2.95603	0.139	0.013	1.90979601558778e-75	B intermediate	BCAR3
2.11451707713757e-79	1.7171	0.461	0.114	4.97884190982813e-75	B intermediate	DRAM2
1.06016786999354e-78	2.251	0.249	0.039	2.49627126668678e-74	B intermediate	IER5
1.29643550149574e-78	2.34492	0.215	0.03	3.05258703182187e-74	B intermediate	TMED8
1.45688194567815e-78	-5.52363	0.016	0.6	3.43037422929377e-74	B intermediate	IL7R
2.76702319833174e-78	2.85508	0.12	0.01	6.51523282279191e-74	B intermediate	DAPK2
2.95853536995876e-78	2.9725	0.095	0.007	6.96616738210489e-74	B intermediate	JDP2
3.63523198991718e-78	-6.29197	0.016	0.598	8.559517243459e-74	B intermediate	GIMAP4
1.51413407702222e-77	7.00149	0.035	0.001	3.56518009775652e-73	B intermediate	IGHV3-11
2.55354851002515e-77	2.17224	0.199	0.026	6.01258532170522e-73	B intermediate	LIMK1
1.18701009836052e-76	1.90588	0.319	0.062	2.79493397759968e-72	B intermediate	RNF141
1.73735421112667e-76	2.03467	0.274	0.048	4.09077422551887e-72	B intermediate	IRF5
5.0264196572027e-76	2.30985	0.252	0.041	1.18352077248495e-71	B intermediate	AL050309.1
5.18035640631317e-76	3.18747	0.069	0.004	1.2197667194305e-71	B intermediate	AC083949.1
5.72186607115006e-76	1.93639	0.319	0.062	1.34727058511299e-71	B intermediate	BICD1
1.30922698360077e-75	-2.19125	0.546	0.829	3.08270585558637e-71	B intermediate	S100A4
1.84981561860421e-75	2.50867	0.199	0.027	4.35557585556547e-71	B intermediate	ARID3A
2.02537961566572e-75	3.21728	0.069	0.004	4.76895884304651e-71	B intermediate	TENM4
2.94957424345753e-75	-2.05084	0.514	0.807	6.9450675136451e-71	B intermediate	ITM2B
6.82993249529421e-75	4.19519	0.05	0.002	1.60817590534197e-70	B intermediate	LINC00173
7.09773804901339e-75	3.48558	0.11	0.009	1.67123340102069e-70	B intermediate	BCL7A
7.63482797966234e-75	2.08089	0.293	0.055	1.79769659609129e-70	B intermediate	GSAP
1.02287480969327e-74	2.27837	0.215	0.031	2.40846102690376e-70	B intermediate	SNN
1.88171964081823e-74	6.39723	0.013	0	4.4306970662706e-70	B intermediate	WNT3
1.90067398247367e-74	1.84194	0.596	0.192	4.47532695913251e-70	B intermediate	PDE4B
3.31392105894886e-74	1.91609	0.363	0.079	7.80295852540097e-70	B intermediate	CCR6
3.44453152159939e-74	4.39936	0.044	0.002	8.11049392075793e-70	B intermediate	GPT2
4.05123477557036e-73	1.82923	0.347	0.073	9.53903740255798e-69	B intermediate	MAP3K8
7.5816344602956e-73	5.32895	0.019	0	1.7851716500212e-68	B intermediate	KIAA1211
9.18986508413476e-73	4.32857	0.025	0	2.16384563271037e-68	B intermediate	IGKV1-8
1.13665440161165e-72	5.01682	0.057	0.003	2.67636645403479e-68	B intermediate	IGHV4-34
1.56398683029851e-72	1.32622	0.662	0.224	3.68256339062088e-68	B intermediate	CAPG
1.31249454164727e-71	1.47043	0.514	0.143	3.09039964776266e-67	B intermediate	PLEK
2.77813032865124e-71	-3.11263	0.413	0.721	6.54138567184221e-67	B intermediate	IFITM1
9.44886409805652e-71	-8.91544	0.003	0.552	2.22482954052839e-66	B intermediate	ANXA1
1.1364835026488e-70	1.52223	0.647	0.224	2.67596405533687e-66	B intermediate	INPP5D
1.27931132410427e-70	3.91091	0.044	0.002	3.01226644373591e-66	B intermediate	HS3ST1
1.31395762118826e-70	1.94902	0.303	0.06	3.09384461484989e-66	B intermediate	PRKD3
2.21853669060565e-70	1.42271	0.817	0.365	5.22376649170006e-66	B intermediate	FCMR
2.25357154310438e-70	2.60587	0.189	0.026	5.30625955539358e-66	B intermediate	NIPAL2
2.71899188766603e-70	1.63081	0.565	0.178	6.40213829869843e-66	B intermediate	CAMK1D
5.49660542590354e-70	1.95989	0.312	0.063	1.29423071358325e-65	B intermediate	FAM3C
1.61657371664292e-69	3.09276	0.148	0.017	3.80638447320742e-65	B intermediate	CCSER1
4.97814709078025e-69	2.91848	0.174	0.023	1.17215451399512e-64	B intermediate	FARP2
5.4511376092513e-69	2.01282	0.256	0.045	1.28352486147431e-64	B intermediate	LIMD1
1.00939096991689e-68	3.5243	0.069	0.004	2.3767119777663e-64	B intermediate	AC009522.1
2.03456349180891e-68	3.32523	0.044	0.002	4.79058319781326e-64	B intermediate	MYBL2
3.77042196559817e-68	4.15114	0.038	0.001	8.87783556019744e-64	B intermediate	AL590550.1
5.61160225518801e-68	-5.0875	0.044	0.567	1.32130786700657e-63	B intermediate	LCK
8.13119371924871e-68	3.2404	0.114	0.011	1.9145708731343e-63	B intermediate	CR1
2.49992034915329e-67	1.44126	0.767	0.364	5.88631245411633e-63	B intermediate	PTPN6
4.35417658007883e-67	2.84782	0.148	0.018	1.02523441754536e-62	B intermediate	FADS3
1.20481709008922e-66	1.64477	0.539	0.17	2.83686232032409e-62	B intermediate	PPM1K
1.21421158408547e-66	4.83093	0.032	0.001	2.85898259588766e-62	B intermediate	LRRN1
1.42629695187223e-66	1.52306	0.685	0.266	3.35835880287835e-62	B intermediate	PRKCB
2.24737504638601e-66	1.36601	0.868	0.434	5.29166928422049e-62	B intermediate	EZR
4.86122765033471e-66	3.98522	0.047	0.002	1.14462466254781e-61	B intermediate	MYO5C
[truncated: 121,197 more rows]

## Sheet: pbmcL1.CellType.markers.L1
p_val	avg_log2FC	pct.1	pct.2	p_val_adj	cluster	gene
0	8.29732	0.767	0.006	0	ASDC	LILRA4
0	7.42798	0.483	0.007	0	ASDC	SERPINF1
0	9.43574	0.417	0.001	0	ASDC	SCT
0	7.71649	0.417	0.002	0	ASDC	CLEC4C
0	8.91307	0.367	0.001	0	ASDC	LRRC26
0	9.26091	0.133	0	0	ASDC	PROC
1.81031634754474e-266	8.69693	0.133	0.001	4.58933297266067e-262	ASDC	AC097375.1
1.03375771383948e-265	11.6562	0.05	0	2.62067918035447e-261	ASDC	SMIM6
1.60346087057322e-264	8.91698	0.1	0	4.06493365299018e-260	ASDC	KCNK17
4.72218369477278e-245	7.24253	0.25	0.003	1.19712078846185e-240	ASDC	DNASE1L3
1.28442866659436e-214	6.49194	0.167	0.002	3.25615511268336e-210	ASDC	LINC01478
3.52784207681303e-214	7.63508	0.167	0.002	8.94343244892871e-210	ASDC	PPM1J
1.37903069630786e-190	6.39201	0.717	0.035	3.49598071821006e-186	ASDC	PLD4
2.62543636084751e-190	7.55956	0.233	0.004	6.65574371838452e-186	ASDC	PTPRS
1.76363700433409e-186	6.30405	0.4	0.011	4.47099616968735e-182	ASDC	RHEX
1.93816780440181e-176	6.93497	0.25	0.004	4.91344920093902e-172	ASDC	AC007381.1
9.31042427287154e-174	7.20058	0.333	0.008	2.36028565741566e-169	ASDC	TPM2
2.12603923075084e-172	8.16909	0.1	0.001	5.38972205387646e-168	ASDC	CYYR1
1.52003571918974e-170	9.00211	0.083	0.001	3.85344255171792e-166	ASDC	SHD
1.66471735144551e-163	10.5678	0.017	0	4.22022495764952e-159	ASDC	ELFN1
4.15699994074053e-162	7.01028	0.133	0.001	1.05384105497713e-157	ASDC	P3H2
8.35682460076454e-160	8.34779	0.067	0	2.11853860453982e-155	ASDC	PLS3
1.29348300055088e-150	8.75117	0.067	0	3.27910875469653e-146	ASDC	KIF17
5.02758298290634e-146	5.36158	0.533	0.025	1.27454256199659e-141	ASDC	JCHAIN
1.02064351503056e-136	7.7434	0.067	0	2.58743337495397e-132	ASDC	PPP1R14B-AS1
6.84122300055065e-135	5.70726	0.433	0.017	1.7343184428696e-130	ASDC	MZB1
7.36316762338078e-134	6.80372	0.217	0.004	1.86663662420326e-129	ASDC	PTCRA
2.82386887160098e-133	9.08235	0.05	0	7.15878997639564e-129	ASDC	C5orf64
7.26546075241043e-132	6.97881	0.267	0.007	1.84186695534357e-127	ASDC	TLR9
4.62860218584818e-129	5.25371	0.7	0.048	1.17339694013437e-124	ASDC	TCF4
1.15748330185665e-125	7.94786	0.1	0.001	2.93433591853678e-121	ASDC	TIFAB
6.94140046001509e-125	6.3952	0.167	0.003	1.75971443061843e-120	ASDC	SCN9A
5.77138021941797e-116	6.36844	0.2	0.004	1.46310259942465e-111	ASDC	LINC01374
3.6607368081877e-114	6.18807	0.067	0	9.28033388243663e-110	ASDC	AXL
2.315131125758e-107	5.58141	0.7	0.059	5.86908891690911e-103	ASDC	ITM2C
1.77221038224269e-104	5.02937	0.417	0.021	4.49273054002344e-100	ASDC	IL3RA
4.77729193053525e-103	7.25674	0.117	0.002	1.21109127730999e-98	ASDC	SIGLEC6
2.44366550223529e-102	6.21826	0.267	0.009	6.19493641471669e-98	ASDC	GAS6
8.02053661817898e-100	5.53122	0.2	0.005	2.03328623807455e-95	ASDC	FAM160A1
1.96176674256635e-97	6.60979	0.133	0.002	4.97327486907995e-93	ASDC	LAMP5
9.45194789874495e-91	6.85139	0.117	0.002	2.39616331181083e-86	ASDC	CUX2
1.66692289082633e-87	7.56526	0.033	0	4.22581622053382e-83	ASDC	LINC01724
3.24750255762502e-87	6.69125	0.483	0.034	8.23274373383518e-83	ASDC	PTGDS
7.09733698226025e-83	8.75771	0.05	0	1.7992458983728e-78	ASDC	AC011893.1
1.57621663548919e-78	5.16295	0.7	0.081	3.99586679262865e-74	ASDC	IRF8
2.14113632214908e-75	6.25156	0.067	0.001	5.42799469028014e-71	ASDC	IGSF10
3.57878589719917e-75	9.62909	0.033	0	9.07258012798961e-71	ASDC	SRPX
1.87232386675765e-74	5.18435	0.55	0.051	4.74652823461731e-70	ASDC	CCDC50
3.84515549506311e-74	5.49528	0.183	0.006	9.74785369553448e-70	ASDC	AC023590.1
3.64311356352529e-71	9.43223	0.033	0	9.23565719489297e-67	ASDC	IGHJ3
6.2160479923018e-70	3.67722	0.5	0.043	1.57583032652843e-65	ASDC	IGKC
3.9281296760617e-68	5.03508	0.333	0.02	9.95820154178402e-64	ASDC	TSPAN13
6.31951979882442e-67	6.14826	0.05	0	1.60206146419998e-62	ASDC	KCNK10
2.63421765163556e-66	9.18595	0.017	0	6.6780051686613e-62	ASDC	CTSV
8.4693563394772e-65	7.57569	0.05	0	2.14706652562087e-60	ASDC	AC007100.1
2.08983334648536e-60	9.29181	0.017	0	5.29793651667503e-56	ASDC	NAT8L
2.24266072823762e-55	6.04916	0.183	0.008	5.68536921215518e-51	ASDC	DERL3
8.13028736820355e-55	4.63198	0.383	0.032	2.06110915071328e-50	ASDC	SPIB
8.58142626608864e-55	5.60196	0.15	0.005	2.17547737271613e-50	ASDC	EPHB1
2.67926467236095e-54	4.78698	0.533	0.065	6.79220387090224e-50	ASDC	UGCG
1.85361479609756e-52	5.85048	0.133	0.004	4.69909886958693e-48	ASDC	NRP1
1.29305978958468e-50	5.02738	0.233	0.013	3.27803587257613e-46	ASDC	LGMN
3.35814469819488e-50	4.73918	0.733	0.141	8.51323262439385e-46	ASDC	IRF7
4.63241015395237e-50	6.84363	0.05	0.001	1.17436229812847e-45	ASDC	AC005699.1
4.17189794664751e-48	8.00461	0.05	0.001	1.05761784845461e-43	ASDC	KIRREL3
8.10443260884564e-48	6.20939	0.083	0.002	2.05455471066846e-43	ASDC	SCAMP5
9.78103168050188e-46	7.84842	0.033	0	2.47958934132403e-41	ASDC	COBL
1.12749900479848e-44	4.69163	0.183	0.009	2.85832272706463e-40	ASDC	FCER1A
5.63078277228078e-44	5.22159	0.217	0.013	1.4274597406009e-39	ASDC	P2RY14
2.51248294710323e-43	3.75638	0.567	0.089	6.36939551920139e-39	ASDC	RNASE6
3.53739996280317e-42	5.00174	0.35	0.035	8.96766264570231e-38	ASDC	PPP1R14B
6.00919924722846e-42	7.14177	0.017	0	1.52339210116489e-37	ASDC	AC110014.1
1.54640620495376e-41	6.05322	0.133	0.005	3.92029437017827e-37	ASDC	LINC00996
1.85488447817546e-41	4.36481	0.317	0.029	4.7023176406226e-37	ASDC	BLNK
6.38365584040925e-41	7.72343	0.033	0	1.61832059210215e-36	ASDC	FAM221B
7.96190865018901e-40	4.27246	0.117	0.004	2.01842346190942e-35	ASDC	RGS7
9.06180182185637e-40	6.02362	0.05	0.001	2.29725737985881e-35	ASDC	FGF13
1.45275581860641e-39	9.09922	0.017	0	3.68288127574912e-35	ASDC	OPN1SW
3.35920295288169e-39	7.3225	0.083	0.002	8.51591540585037e-35	ASDC	P2RY6
4.03018478755267e-39	5.90196	0.033	0	1.02169214549248e-34	ASDC	SLC4A3
8.82916000476748e-38	4.95826	0.183	0.011	2.2382803528086e-33	ASDC	DAPK2
1.94038601322674e-37	9.60214	0.017	0	4.91907258213111e-33	ASDC	PCDHGC3
6.75955938848517e-37	6.72516	0.067	0.002	1.71361590057488e-32	ASDC	CYP46A1
3.97624570113898e-35	7.4479	0.033	0	1.00801804769574e-30	ASDC	BEND6
3.03661265224912e-34	5.77527	0.083	0.003	7.69811673471675e-30	ASDC	COL24A1
8.02345713374481e-34	7.45282	0.033	0	2.03402661797565e-29	ASDC	AC092723.4
8.89870897084256e-34	4.21709	0.35	0.042	2.2559117111983e-29	ASDC	NAPSA
2.27610426457201e-33	2.46973	1	0.782	5.77015192111649e-29	ASDC	CD74
3.99998779747949e-33	4.92652	0.083	0.003	1.01403690653903e-28	ASDC	SLC41A2
8.53728831733039e-33	2.74796	0.7	0.164	2.16428796132643e-28	ASDC	GZMB
1.24126220084098e-31	3.8054	0.383	0.053	3.14672380535197e-27	ASDC	BCL11A
7.41227436408626e-31	7.51641	0.017	0	1.87908567403951e-26	ASDC	AC011944.1
1.80494273062392e-30	4.48701	0.233	0.021	4.57571031640469e-26	ASDC	DAB2
3.69926813655855e-30	5.65044	0.05	0.001	9.37801465298958e-26	ASDC	CADM4
4.16151263135884e-30	6.82828	0.033	0	1.05498506717578e-25	ASDC	AC137932.3
1.0985091940594e-29	2.41223	0.917	0.401	2.78483065785999e-25	ASDC	HLA-DPA1
1.61615475739086e-29	3.9257	0.533	0.114	4.09711392546158e-25	ASDC	APP
9.18659490346735e-29	5.90864	0.083	0.003	2.32889367397801e-24	ASDC	PHEX
1.39196441147615e-28	4.22403	0.2	0.017	3.52876897953319e-24	ASDC	ST14
1.7130656565333e-28	7.10796	0.067	0.002	4.34279274587758e-24	ASDC	PMP22
1.87329787038083e-28	4.12819	0.233	0.023	4.74899743120244e-24	ASDC	PHACTR1
9.23876460219697e-28	2.22333	0.883	0.313	2.34211921430295e-23	ASDC	CST3
2.51524868935959e-27	5.46041	0.083	0.003	6.3764069523955e-23	ASDC	TNFRSF21
4.1715760803201e-27	6.20755	0.067	0.002	1.05753625212195e-22	ASDC	SYCP2L
1.93851075038804e-26	5.28783	0.067	0.002	4.91431860330873e-22	ASDC	SH3BP4
2.64026307467226e-26	9.10776	0.017	0	6.69333092060164e-22	ASDC	CCDC60
2.64704520280957e-26	7.87678	0.017	0	6.71052429364255e-22	ASDC	AC007387.3
1.18151803246822e-25	7.23694	0.033	0.001	2.99526636411018e-21	ASDC	LDLRAD2
1.29834387680038e-24	6.68094	0.083	0.004	3.29143156207663e-20	ASDC	MYBL2
1.67110959264851e-24	6.79883	0.017	0	4.23642992832324e-20	ASDC	AC005005.3
1.05965909673801e-23	6.96138	0.017	0	2.68634177614052e-19	ASDC	AC093503.2
5.87850941021854e-23	8.21231	0.017	0	1.4902609205845e-18	ASDC	TDRD1
1.11504563463358e-22	5.90402	0.083	0.004	2.82675218835959e-18	ASDC	MAP1A
1.42300364723874e-22	3.6897	0.317	0.049	3.60745654611493e-18	ASDC	LILRB4
2.97211908635899e-22	7.8431	0.017	0	7.53461909582867e-18	ASDC	BX470102.1
2.97852082758097e-22	7.29545	0.017	0	7.55084815000052e-18	ASDC	AC138207.1
4.07124167756123e-22	3.23391	0.3	0.044	1.03210047767855e-17	ASDC	NIBAN3
7.45411561676617e-22	1.57302	0.883	0.344	1.88969285000639e-17	ASDC	HLA-DRA
1.13821435405112e-21	7.26327	0.033	0.001	2.88548720895499e-17	ASDC	GGT1
1.5448576542761e-21	6.01983	0.083	0.004	3.91636863935534e-17	ASDC	SERPINF2
4.14692443181486e-21	-2.45967	0.383	0.879	1.05128681270938e-16	ASDC	TXNIP
1.84663235731164e-20	1.71545	0.85	0.386	4.68139768902075e-16	ASDC	HLA-DRB1
2.15484815865545e-20	8.09501	0.017	0	5.46275556700743e-16	ASDC	SCHIP1
2.60504382993557e-20	5.51029	0.067	0.003	6.60404661326967e-16	ASDC	SMIM5
7.4147500026602e-20	4.98838	0.1	0.006	1.87971327317439e-15	ASDC	SMPD3
1.0921638040123e-19	5.72617	0.033	0.001	2.76874445955158e-15	ASDC	AC116362.1
1.26969982954179e-19	3.5697	0.317	0.056	3.2188160378714e-15	ASDC	C12orf45
1.29044732235581e-19	6.49051	0.05	0.002	3.2714130069042e-15	ASDC	AC004846.1
2.51573126883551e-19	7.86491	0.017	0	6.3776303396249e-15	ASDC	LINC00885
2.56277500464638e-19	5.90822	0.017	0	6.49689091427904e-15	ASDC	AC009480.1
2.73338750976138e-19	4.26573	0.183	0.021	6.92941067599608e-15	ASDC	TNNI2
2.97770540429607e-19	5.69379	0.05	0.002	7.54878097043097e-15	ASDC	LRRC36
3.01715168787392e-19	1.73404	0.867	0.362	7.64878124392918e-15	ASDC	FCER1G
9.3207366551379e-19	3.48082	0.417	0.1	2.36289994944401e-14	ASDC	STMN1
9.58538856611536e-19	-2.6159	0.183	0.783	2.4299918553959e-14	ASDC	CD52
1.86868888334531e-18	-2.57538	0.217	0.808	4.73731318816869e-14	ASDC	BTG1
2.24581148223384e-18	2.29266	0.783	0.461	5.69335668861102e-14	ASDC	SEC61B
2.35197225261867e-18	1.91289	0.883	0.624	5.9624848576136e-14	ASDC	TAGLN2
3.10464842254955e-18	5.85932	0.05	0.002	7.87059421600537e-14	ASDC	SLC47A1
3.68112883722599e-18	4.1783	0.067	0.003	9.3320297152516e-14	ASDC	MMRN1
5.08119461722525e-18	4.45344	0.1	0.007	1.28813364741277e-13	ASDC	PMEPA1
6.4132171293309e-18	6.24681	0.017	0	1.62581467445668e-13	ASDC	CERNA2
7.76496621961686e-18	-4.37574	0.083	0.677	1.96849658633507e-13	ASDC	KLF2
8.30165228110363e-18	4.01168	0.2	0.026	2.10455186978258e-13	ASDC	PPP1R14A
1.06652706858002e-17	5.05931	0.067	0.003	2.70375277155721e-13	ASDC	COL9A3
1.65231917076464e-17	5.69841	0.033	0.001	4.18879432980543e-13	ASDC	PAPLN
1.66229061232428e-17	7.33295	0.017	0	4.21407293130327e-13	ASDC	HHIP-AS1
1.84623277790585e-17	3.71196	0.2	0.026	4.68038471526912e-13	ASDC	IRF4
2.0343308353245e-17	5.23858	0.1	0.007	5.15723210063115e-13	ASDC	LINC02812
2.05163562893351e-17	-5.4906	0.083	0.655	5.20110148290935e-13	ASDC	IFITM1
1.05706685048e-16	2.62084	0.65	0.273	2.67977017265184e-12	ASDC	ALOX5AP
2.2932987433037e-16	2.81728	0.417	0.107	5.81374164414922e-12	ASDC	TGFBI
2.31604120092091e-16	7.28082	0.017	0	5.87139604845459e-12	ASDC	OBSL1
3.29053283706441e-16	5.94687	0.033	0.001	8.34182979524198e-12	ASDC	COL26A1
5.01267541057761e-16	3.41075	0.65	0.312	1.27076334333553e-11	ASDC	TXN
5.13776523342867e-16	7.25193	0.017	0	1.3024748643265e-11	ASDC	TRERNA1
5.14946165395984e-16	6.84822	0.017	0	1.30544002389536e-11	ASDC	KCTD19
1.06389521751383e-15	4.20154	0.133	0.014	2.6970807659193e-11	ASDC	SLC2A8
1.12175455691051e-15	6.0439	0.017	0	2.84375997722383e-11	ASDC	AC011481.1
2.28203273147791e-15	8.15986	0.017	0	5.78518117756964e-11	ASDC	AL513493.1
2.28203273147791e-15	7.9217	0.017	0	5.78518117756964e-11	ASDC	INO80-AS1
2.28368796142061e-15	8.03808	0.017	0	5.7893773509974e-11	ASDC	AC020914.1
3.00727696326416e-15	5.65084	0.05	0.002	7.62374782957097e-11	ASDC	MSRB3
4.60544804257267e-15	7.36366	0.017	0	1.1675271332726e-10	ASDC	ZNF556
5.13953664127206e-15	3.63476	0.167	0.021	1.30292393392888e-10	ASDC	MYL6B
5.53644911148876e-15	2.233	0.567	0.211	1.40354521425352e-10	ASDC	HLA-DMA
6.93593813252662e-15	-4.81165	0.033	0.584	1.75832967597682e-10	ASDC	GIMAP7
7.28339575036158e-15	3.03452	0.55	0.224	1.84641365667416e-10	ASDC	HERPUD1
8.71902897676119e-15	4.8777	0.033	0.001	2.21036103589873e-10	ASDC	DANT2
9.48463483633562e-15	4.34288	0.117	0.011	2.40444977735944e-10	ASDC	LHFPL2
1.24900499405767e-14	2.53821	0.65	0.316	3.16635256043561e-10	ASDC	PLAC8
1.57824992066142e-14	1.88892	0.75	0.398	4.00102137386877e-10	ASDC	HLA-DPB1
2.39435814497062e-14	2.30785	0.417	0.115	6.06993733331501e-10	ASDC	CLIC3
2.61353003223981e-14	3.98518	0.15	0.018	6.62555998473114e-10	ASDC	TUBB6
3.01500571488142e-14	3.50106	0.267	0.053	7.64334098779588e-10	ASDC	MGST2
3.1082257865887e-14	4.87573	0.117	0.012	7.879663191581e-10	ASDC	KPTN
3.15655377023871e-14	3.91244	0.133	0.015	8.00217946293214e-10	ASDC	TRAF4
3.46958242594323e-14	4.25096	0.133	0.015	8.79573840800869e-10	ASDC	NREP
4.12454939615632e-14	-1.55009	0.45	0.871	1.04561451741959e-09	ASDC	HLA-E
6.33494007859434e-14	-1.65668	0.383	0.851	1.60597065932445e-09	ASDC	PTPRC
6.41276971836168e-14	3.7808	0.267	0.055	1.62570125130187e-09	ASDC	GAPT
1.04385080618281e-13	5.50133	0.017	0	2.64626617875403e-09	ASDC	NHLH1
1.44284636866616e-13	3.59246	0.283	0.063	3.65775982920559e-09	ASDC	IDH3A
1.73742927579433e-13	5.25105	0.067	0.004	4.40455695706621e-09	ASDC	LTK
2.45355302258126e-13	5.77614	0.05	0.003	6.22000226754574e-09	ASDC	PTK7
3.02102875673641e-13	6.29238	0.017	0	7.65861000120247e-09	ASDC	THRIL
3.04262716129382e-13	0.88374	1	0.925	7.71336411659597e-09	ASDC	RPLP0
3.76289932752771e-13	2.31087	0.45	0.145	9.53932608521549e-09	ASDC	HLA-DQA1
4.2564719236987e-13	2.37167	0.483	0.167	1.07905819737686e-08	ASDC	C12orf75
4.98624962549276e-13	6.93395	0.017	0	1.26406414255867e-08	ASDC	NID2
5.3697569339435e-13	5.30856	0.033	0.001	1.36128708032402e-08	ASDC	LRRC34
8.14315688502042e-13	7.75526	0.017	0	2.06437170192153e-08	ASDC	IL21R-AS1
8.81474011563251e-13	-5.35109	0.05	0.534	2.234624766714e-08	ASDC	IL32
9.29070242587778e-13	4.06626	0.167	0.025	2.35528597198428e-08	ASDC	VEGFB
1.17735183026943e-12	3.52789	0.233	0.046	2.98470462491604e-08	ASDC	PTMS
1.19723301545772e-12	2.50948	0.367	0.104	3.03510541748687e-08	ASDC	OTULINL
1.31505584890105e-12	6.69583	0.017	0	3.33379808254904e-08	ASDC	TTC39A
1.32897765188895e-12	5.45902	0.017	0	3.36909124530368e-08	ASDC	ARPP21
1.65914852466859e-12	5.64668	0.033	0.001	4.20610742488735e-08	ASDC	GPR173
3.3050136700586e-12	5.71418	0.017	0	8.37854015496557e-08	ASDC	NT5DC4
3.39550097020736e-12	4.42901	0.083	0.007	8.60793450957269e-08	ASDC	MIR497HG
3.47522182564813e-12	-3.76563	0.067	0.547	8.81003485020058e-08	ASDC	TSC22D3
5.00661588676368e-12	-3.8319	0.033	0.52	1.26922719345346e-07	ASDC	CD3E
5.62766993043821e-12	4.80444	0.1	0.01	1.42667060406539e-07	ASDC	CD3EAP
7.58746478900991e-12	5.87676	0.017	0	1.9234981986619e-07	ASDC	LINC01924
8.87573432588726e-12	-3.34521	0.083	0.553	2.25008740895568e-07	ASDC	EVL
9.86924607184509e-12	1.67666	0.367	0.102	2.50195257167345e-07	ASDC	AFF3
1.14359324227641e-11	3.79937	0.05	0.003	2.89912322849492e-07	ASDC	AC093525.6
1.65668813924898e-11	7.41309	0.017	0	4.19987010181008e-07	ASDC	DYRK3
1.66107917371455e-11	6.57923	0.017	0	4.21100181328375e-07	ASDC	ARL5C
1.66812854539818e-11	6.37698	0.017	0	4.22887267543892e-07	ASDC	AC125437.3
2.49073822984313e-11	4.89019	0.017	0	6.31427048647531e-07	ASDC	FAM160A1-DT
3.50809992116008e-11	6.05988	0.017	0	8.89338411013291e-07	ASDC	LINC02765
4.55588686812774e-11	3.11508	0.333	0.1	1.15496287993906e-06	ASDC	CYB561A3
7.03238740921135e-11	6.30229	0.017	0	1.78278053210917e-06	ASDC	MAP1B
7.18448985371499e-11	4.64752	0.017	0	1.82134002281529e-06	ASDC	KRT5
7.27470661610971e-11	3.61184	0.15	0.024	1.84421087424997e-06	ASDC	SNCA
8.24916032478043e-11	2.2487	0.383	0.126	2.09124463393509e-06	ASDC	CCDC88A
9.74600083947061e-11	2.29072	0.483	0.191	2.47070867281419e-06	ASDC	FCHSD2
1.26083574185219e-10	1.56754	0.617	0.301	3.19634468916948e-06	ASDC	HLA-DRB5
1.32773027427466e-10	3.85952	0.183	0.035	3.36592901831368e-06	ASDC	GRAMD1B
1.8755022960918e-10	-1.34182	0.9	0.993	4.75458587082232e-06	ASDC	MALAT1
1.92639538312016e-10	2.19584	0.183	0.034	4.88360493574791e-06	ASDC	CSF2RB
2.55607256896005e-10	5.43789	0.017	0	6.47989956957063e-06	ASDC	S100A3
3.097275164084e-10	-1.68786	0.25	0.674	7.85190226846936e-06	ASDC	FYB1
4.05855755429221e-10	4.46562	0.083	0.009	1.02888492558862e-05	ASDC	GSEC
4.46508579268878e-10	3.69843	0.117	0.016	1.13194389930453e-05	ASDC	FLT3
4.53407026943401e-10	7.31632	0.017	0	1.14943215400422e-05	ASDC	DNAJC12
4.55899534960067e-10	6.17268	0.017	0	1.15575091107727e-05	ASDC	AC092969.1
4.82350919571715e-10	-3.69823	0.067	0.479	1.22280781620625e-05	ASDC	PLAAT4
4.89491843973755e-10	3.07808	0.133	0.02	1.24091077365787e-05	ASDC	MCOLN2
5.48439238019573e-10	-4.67766	0.017	0.437	1.39034831230342e-05	ASDC	IL7R
5.5391990918715e-10	5.14011	0.067	0.006	1.40424236178034e-05	ASDC	CCR5AS
6.20148501817829e-10	3.83855	0.167	0.031	1.57213846695838e-05	ASDC	CLN8
7.11668134158401e-10	4.92538	0.033	0.002	1.80414988690496e-05	ASDC	BX323046.1
7.45137035731885e-10	4.2251	0.05	0.003	1.8889968992839e-05	ASDC	HIST1H2AI
8.10385752716148e-10	4.93116	0.017	0	2.05440892171071e-05	ASDC	TMEM45A
9.07537854786116e-10	4.19639	0.05	0.003	2.30069921566828e-05	ASDC	MYLK
1.0344832444646e-09	7.71054	0.017	0	2.6225184730422e-05	ASDC	CIRBP-AS1
1.03493731729923e-09	7.2167	0.017	0	2.62366959308529e-05	ASDC	AC104083.1
1.03812127319859e-09	6.17264	0.017	0	2.63174123968574e-05	ASDC	USP6
1.07337123310233e-09	4.25385	0.067	0.006	2.72110341303771e-05	ASDC	GUCY1A1
1.08979062194097e-09	-2.80909	0.1	0.512	2.76272820568255e-05	ASDC	GIMAP4
1.24498184183879e-09	-0.713614	0.95	0.974	3.15615346724553e-05	ASDC	TMSB4X
1.3184156792865e-09	3.12009	0.117	0.017	3.3423155885592e-05	ASDC	UPK3A
1.32923554662995e-09	-4.91319	0.017	0.421	3.36974503426158e-05	ASDC	CD3D
1.34277614178776e-09	8.05773	0.017	0	3.40407179704614e-05	ASDC	AL357556.4
1.35905076893133e-09	1.00156	0.9	0.815	3.44532960431781e-05	ASDC	VIM
1.44285488219931e-09	4.94547	0.05	0.004	3.65778141186347e-05	ASDC	AL096865.1
2.32278510816957e-09	2.75657	0.233	0.057	5.88849252772067e-05	ASDC	WDFY4
2.35062777719456e-09	-5.66009	0.017	0.408	5.95907647796592e-05	ASDC	SKAP1
2.36186797763558e-09	1.10706	0.817	0.726	5.98757151010396e-05	ASDC	GABARAP
2.47343338059043e-09	-3.31845	0.017	0.423	6.27040096313479e-05	ASDC	LCK
2.61194066827785e-09	2.79449	0.317	0.099	6.62153078815117e-05	ASDC	UNC93B1
2.69165061410225e-09	-1.21464	0.45	0.828	6.82360347181062e-05	ASDC	ITM2B
2.82757749648828e-09	7.65147	0.017	0	7.16819171134744e-05	ASDC	CRLF2
2.84768595255108e-09	5.80275	0.017	0	7.21916865831224e-05	ASDC	PLAU
2.88351168253991e-09	4.90246	0.017	0	7.30999046640692e-05	ASDC	AC087280.2
3.22352120336343e-09	2.12271	0.417	0.158	8.17194860264663e-05	ASDC	MPEG1
3.34511331671018e-09	1.09316	0.8	0.803	8.48019676919197e-05	ASDC	CYBA
3.58259275127517e-09	6.85591	0.017	0	9.08223088375769e-05	ASDC	PLCB4
3.60033598853103e-09	5.97226	0.017	0	9.12721176452501e-05	ASDC	AC084871.3
3.65257710454054e-09	5.10456	0.017	0	9.25964821772072e-05	ASDC	TCF4-AS1
3.83884826916892e-09	2.68748	0.233	0.058	9.73186424717013e-05	ASDC	SLAMF7
3.90032180070402e-09	2.97078	0.217	0.053	9.88770579696476e-05	ASDC	HYOU1
4.4751661568307e-09	2.53561	0.267	0.075	0.00011345	ASDC	HLA-DQA2
5.0857894386979e-09	1.84045	0.65	0.441	0.00012893	ASDC	SPCS1
5.41375665596056e-09	4.25074	0.167	0.035	0.000137244	ASDC	ST6GALNAC4
6.39599740277451e-09	3.63301	0.117	0.018	0.000162145	ASDC	MYCL
6.64421842505219e-09	-4.69892	0.017	0.398	0.000168438	ASDC	GIMAP5
6.84270909830479e-09	1.4671	0.533	0.245	0.00017347	ASDC	HLA-DQB1
7.4102087383386e-09	4.89088	0.05	0.004	0.000187856	ASDC	AC005586.1
7.7023690589552e-09	1.76339	0.517	0.252	0.000195263	ASDC	GRN
7.74035915436744e-09	3.86543	0.083	0.01	0.000196226	ASDC	INSL6
7.77018904167597e-09	-1.93901	0.183	0.589	0.000196982	ASDC	CD48
8.58408435953503e-09	-0.907917	0.75	0.946	0.000217615	ASDC	MT-CO3
9.15089084254033e-09	1.6635	0.683	0.487	0.000231984	ASDC	VAMP8
9.62327216290156e-09	-0.769841	0.867	0.971	0.00024396	ASDC	HLA-B
1.09397985315427e-08	5.11252	0.017	0	0.000277335	ASDC	AC123768.5
1.22056403576759e-08	3.19928	0.133	0.023	0.000309425	ASDC	COBLL1
1.22329092216961e-08	2.02463	0.483	0.226	0.000310116	ASDC	PTPRE
1.29628313203622e-08	1.65654	0.733	0.622	0.000328621	ASDC	PPIB
1.43398065901602e-08	-3.14277	0.033	0.42	0.000363528	ASDC	CD247
1.5219737125652e-08	-1.68871	0.183	0.58	0.000385836	ASDC	GSTK1
1.6213862290474e-08	5.74647	0.017	0	0.000411038	ASDC	RHBDL2
1.64940864448358e-08	4.80717	0.05	0.004	0.000418142	ASDC	DEPTOR
1.92184780414963e-08	4.73518	0.033	0.002	0.000487208	ASDC	LINC00865
1.95827670896067e-08	6.82255	0.017	0	0.000496443	ASDC	AC093425.1
2.28217330935953e-08	-6.88741	0	0.357	0.000578554	ASDC	FCMR
2.38968514774858e-08	5.52178	0.017	0	0.000605809	ASDC	AC007376.2
2.46517471911883e-08	1.99221	0.6	0.382	0.000624946	ASDC	TUBA1B
2.47080132539968e-08	4.99674	0.05	0.004	0.000626373	ASDC	PACSIN1
2.70766213884713e-08	2.18123	0.583	0.365	0.000686419	ASDC	PLP2
2.8571313035558e-08	6.84427	0.017	0.001	0.000724311	ASDC	ANKFN1
2.96038100745223e-08	3.21694	0.133	0.024	0.000750486	ASDC	KMO
3.02159583313481e-08	-0.81493	0.783	0.936	0.000766005	ASDC	RPL36
3.08155259830759e-08	2.88971	0.083	0.01	0.000781204	ASDC	MAP3K2-DT
3.22265668291893e-08	-1.74705	0.133	0.522	0.000816976	ASDC	TRAF3IP3
3.29183203051284e-08	3.15678	0.217	0.057	0.000834512	ASDC	HIP1
3.4326959940585e-08	6.78871	0.017	0.001	0.000870223	ASDC	SMOC1
3.52470316177541e-08	4.6892	0.017	0.001	0.000893547	ASDC	AC234582.2
3.58635973620604e-08	2.82843	0.15	0.03	0.000909178	ASDC	MYO1E
4.09214064785718e-08	1.80068	0.617	0.457	0.0010374	ASDC	PARK7
4.10230118275239e-08	7.46637	0.017	0.001	0.00103997	ASDC	SLC12A3
4.82982236779826e-08	3.26244	0.083	0.011	0.00122441	ASDC	AP1S3
5.32576031197356e-08	-1.01737	0.633	0.91	0.00135013	ASDC	MT-ATP6
5.44607532419888e-08	-1.43084	0.183	0.586	0.00138063	ASDC	TLE5
5.58843291859927e-08	5.1906	0.05	0.004	0.00141672	ASDC	NOTCH4
5.6712291306656e-08	3.24099	0.233	0.068	0.00143771	ASDC	SOX4
5.70010845017362e-08	-6.96381	0	0.342	0.00144503	ASDC	LINC00861
5.83396177679183e-08	2.87551	0.183	0.044	0.00147897	ASDC	SLC1A5
6.57694391996479e-08	-2.48029	0.05	0.423	0.00166732	ASDC	TRBC2
6.63585636022936e-08	-3.2508	0.067	0.413	0.00168226	ASDC	ETS1
6.95702026130378e-08	1.78862	0.433	0.185	0.00176367	ASDC	CD68
6.97452426112124e-08	3.76722	0.083	0.011	0.00176811	ASDC	PLXNA4
7.36907704942683e-08	3.79908	0.117	0.02	0.00186813	ASDC	PON2
7.54184199267221e-08	-2.67998	0.067	0.428	0.00191193	ASDC	CD7
7.77629866255057e-08	-1.84387	0.133	0.51	0.00197137	ASDC	UBE2D3
8.17594478322845e-08	5.1323	0.017	0.001	0.00207268	ASDC	SPATA17
8.1778477383391e-08	2.91426	0.2	0.051	0.00207317	ASDC	FABP5
8.2108580407936e-08	0.668609	0.933	0.932	0.00208153	ASDC	FTH1
8.62447546334279e-08	-2.8362	0.05	0.414	0.00218639	ASDC	SUN2
9.15466727627613e-08	-0.906631	0.817	0.944	0.0023208	ASDC	HLA-C
9.52137824603019e-08	7.58513	0.017	0.001	0.00241376	ASDC	AC127024.5
9.5246187585474e-08	6.53196	0.017	0.001	0.00241459	ASDC	AC005740.3
9.62888073409918e-08	5.26348	0.017	0.001	0.00244102	ASDC	KCNJ1
9.86254056713612e-08	2.63693	0.183	0.044	0.00250025	ASDC	ATF5
1.03710423866716e-07	-3.41762	0.05	0.392	0.00262916	ASDC	SLC9A3R1
1.1178235600118e-07	6.23109	0.017	0.001	0.00283379	ASDC	AP001160.2
1.19987670148532e-07	4.63995	0.067	0.008	0.00304181	ASDC	MFSD2A
1.24354000976027e-07	3.22044	0.2	0.053	0.0031525	ASDC	SNRNP25
1.58971305389115e-07	-3.11322	0.033	0.38	0.00403008	ASDC	TAGAP
1.62459828640676e-07	-0.848683	0.783	0.929	0.00411852	ASDC	HLA-A
1.67293513982923e-07	-1.88708	0.183	0.541	0.00424106	ASDC	ANXA1
1.77818454530037e-07	1.57511	0.5	0.254	0.00450788	ASDC	RNF130
1.97682577780642e-07	4.62843	0.033	0.002	0.00501145	ASDC	AL662797.1
2.29042428846818e-07	1.57206	0.583	0.349	0.00580645	ASDC	PYCARD
2.64381577948793e-07	1.911	0.55	0.343	0.00670234	ASDC	NPC2
2.68819623711025e-07	-6.46409	0	0.316	0.00681485	ASDC	LAT
2.71894410470203e-07	5.90978	0.017	0.001	0.0068928	ASDC	AC239799.1
2.72499440774642e-07	5.87122	0.017	0.001	0.00690813	ASDC	CRYM
2.72672545276264e-07	5.64175	0.017	0.001	0.00691252	ASDC	AL512791.1
2.76244681947853e-07	4.60821	0.017	0.001	0.00700308	ASDC	AL592430.1
2.87673608395603e-07	2.83251	0.35	0.151	0.00729281	ASDC	SELENOS
2.91369124318327e-07	-2.59576	0.033	0.375	0.0073865	ASDC	LCP2
2.96223118290624e-07	4.48017	0.033	0.002	0.00750955	ASDC	AC090912.1
3.11551769531485e-07	6.85777	0.017	0.001	0.00789815	ASDC	INTU
3.2546648102778e-07	4.44744	0.033	0.002	0.0082509	ASDC	BX284613.2
3.39354843039799e-07	-1.19316	0.4	0.726	0.00860298	ASDC	SARAF
3.5115681165909e-07	4.8185	0.05	0.005	0.00890218	ASDC	LINC01163
3.5776924169266e-07	5.761	0.017	0.001	0.00906981	ASDC	DRD4
4.18054148637646e-07	2.31824	0.233	0.071	0.0105981	ASDC	RUNX2
4.40308475230113e-07	-1.44711	0.1	0.466	0.0111623	ASDC	ICAM3
4.59353830567121e-07	-1.91258	0.133	0.474	0.0116451	ASDC	BIN2
4.66694571631029e-07	5.70263	0.017	0.001	0.0118312	ASDC	AC024257.1
4.84495097264575e-07	-2.43349	0.05	0.38	0.0122824	ASDC	ISG20
4.919709754743e-07	5.36809	0.033	0.002	0.012472	ASDC	AL035446.2
5.13851050941437e-07	2.60899	0.183	0.048	0.0130266	ASDC	SHTN1
5.28798833630542e-07	6.51876	0.017	0.001	0.0134056	ASDC	TTC36
5.50043555907467e-07	-6.83865	0	0.304	0.0139442	ASDC	TCF7
6.02168622501073e-07	5.49255	0.017	0.001	0.0152656	ASDC	AL121928.1
6.51074576099599e-07	-2.58439	0.017	0.333	0.0165054	ASDC	CD3G
6.77346282728795e-07	4.07585	0.033	0.002	0.0171714	ASDC	CA8
6.78678087478077e-07	7.31517	0.017	0.001	0.0172052	ASDC	BX004807.1
6.80865694394141e-07	-6.43363	0	0.3	0.0172606	ASDC	FLT3LG
7.01049538451585e-07	4.03989	0.017	0.001	0.0177723	ASDC	AL138820.1
7.09092273389206e-07	-1.00312	0.35	0.712	0.0179762	ASDC	LIMD2
7.55428737931198e-07	-6.80532	0	0.298	0.0191509	ASDC	GZMM
7.9150229475913e-07	4.07961	0.05	0.005	0.0200654	ASDC	ZNF70
8.09155055865577e-07	-5.08995	0.017	0.315	0.0205129	ASDC	P2RY8
8.12133779177049e-07	3.20613	0.117	0.023	0.0205884	ASDC	BAIAP2
8.2606032535138e-07	-6.438	0	0.297	0.0209415	ASDC	ZAP70
8.46518170466644e-07	1.38125	0.767	0.623	0.0214601	ASDC	UCP2
8.71181621288247e-07	5.03838	0.017	0.001	0.0220853	ASDC	RASSF8
8.79959728761121e-07	-2.01148	0.25	0.547	0.0223079	ASDC	LTB
9.02421314118403e-07	1.98248	0.283	0.099	0.0228773	ASDC	SULF2
1.03485257028388e-06	-1.0087	0.383	0.73	0.0262345	ASDC	EMP3
1.12916079744799e-06	2.52962	0.1	0.018	0.0286254	ASDC	MGLL
1.13972011948237e-06	2.67805	0.25	0.084	0.028893	ASDC	PAIP1
1.1562050578085e-06	3.0171	0.117	0.023	0.029311	ASDC	CD180
1.16216923048448e-06	5.36442	0.033	0.002	0.0294622	ASDC	ALDH7A1
1.24407272693408e-06	-5.5364	0.017	0.307	0.0315385	ASDC	BCL11B
1.34929136137544e-06	-1.67473	0.15	0.492	0.0342059	ASDC	STK4
1.36917009856352e-06	6.50661	0.017	0.001	0.0347098	ASDC	SLC7A11
1.38795785311195e-06	-1.58942	0.183	0.508	0.0351861	ASDC	PCED1B-AS1
1.39637807605824e-06	2.62188	0.233	0.076	0.0353996	ASDC	PLAAT3
1.46328799850759e-06	-6.48779	0	0.286	0.0370958	ASDC	CD96
1.528119647774e-06	6.38234	0.017	0.001	0.0387394	ASDC	AL022238.2
1.65053367168369e-06	-3.70183	0.017	0.313	0.0418427	ASDC	CLEC2D
1.66140899040188e-06	4.58078	0.05	0.005	0.0421184	ASDC	CLIC2
1.68196719576387e-06	-6.91464	0	0.284	0.0426396	ASDC	CCR7
1.73974067879899e-06	4.51421	0.017	0.001	0.0441042	ASDC	MINAR1
1.77967707583359e-06	-0.935142	0.317	0.628	0.0451166	ASDC	NOP53
1.82576276600199e-06	-4.94332	0.017	0.302	0.0462849	ASDC	PITPNC1
1.90592524956628e-06	5.31821	0.017	0.001	0.0483171	ASDC	AC073575.2
1.91223570326663e-06	4.98453	0.017	0.001	0.0484771	ASDC	BMP6
1.93327683296532e-06	3.26915	0.183	0.052	0.0490105	ASDC	ST3GAL2
1.97182074935078e-06	2.04717	0.3	0.116	0.0499876	ASDC	ALDH2
2.19892282702213e-06	3.75799	0.033	0.003	0.0557449	ASDC	BUB1
2.21574962988574e-06	3.41824	0.067	0.009	0.0561715	ASDC	CCR5
2.31561380873348e-06	3.10383	0.117	0.024	0.0587031	ASDC	BCL7A
2.36969254328701e-06	-3.54213	0.05	0.34	0.0600741	ASDC	PRKCH
2.38357659212983e-06	3.33925	0.033	0.003	0.0604261	ASDC	AC139099.2
2.40260821535618e-06	2.75036	0.033	0.003	0.0609085	ASDC	CAMP
2.40557155824504e-06	2.78574	0.133	0.03	0.0609836	ASDC	OPN3
2.58238846269011e-06	6.58366	0.017	0.001	0.0654661	ASDC	LNCAROD
2.59770671088095e-06	5.23261	0.017	0.001	0.0658545	ASDC	AC109460.2
2.59980230799323e-06	5.24202	0.017	0.001	0.0659076	ASDC	AC008946.1
2.82153459763893e-06	-1.49583	0.217	0.546	0.0715287	ASDC	MT-ATP8
2.88518414580429e-06	1.46939	0.6	0.453	0.0731423	ASDC	RNASET2
2.93398750982583e-06	-2.32691	0.083	0.387	0.0743795	ASDC	LEPROTL1
3.58472532887273e-06	1.91993	0.433	0.224	0.0908764	ASDC	CD4
3.60547105709689e-06	-1.61807	0.117	0.42	0.0914023	ASDC	ANXA6
3.70057141111602e-06	-3.08173	0.067	0.352	0.0938132	ASDC	CD2
3.70182630342444e-06	2.16592	0.133	0.031	0.093845	ASDC	TTYH2
3.75753034235e-06	-6.26426	0	0.269	0.0952572	ASDC	PIK3IP1
3.76218922115851e-06	-4.71898	0.017	0.29	0.0953753	ASDC	RHOH
3.89615571004861e-06	1.51758	0.517	0.297	0.0987714	ASDC	PLEK
4.03253553947925e-06	2.85172	0.1	0.019	0.102229	ASDC	FAM30A
4.05218892906874e-06	3.92961	0.05	0.006	0.102727	ASDC	RAD51AP1
4.12697404644486e-06	1.90673	0.4	0.207	0.104623	ASDC	IGFLR1
4.21775189097137e-06	2.57389	0.2	0.062	0.106924	ASDC	MAPKAPK2
4.51017545171067e-06	3.17095	0.033	0.003	0.114337	ASDC	NUP210L
4.51248570071727e-06	-3.18902	0.033	0.316	0.114396	ASDC	RESF1
4.54082500316108e-06	2.393	0.367	0.18	0.115114	ASDC	CAT
4.55140303783403e-06	4.22046	0.067	0.01	0.115383	ASDC	ENTPD7
4.56068652572465e-06	-1.76025	0.117	0.426	0.115618	ASDC	ARHGEF1
4.65424880541511e-06	0.732826	0.883	0.853	0.11799	ASDC	ACTG1
4.82334629287569e-06	-6.44045	0	0.264	0.122277	ASDC	TC2N
4.84491216100393e-06	-6.4098	0	0.264	0.122823	ASDC	PRKCQ-AS1
5.03704340647169e-06	6.73667	0.017	0.001	0.127694	ASDC	PLVAP
5.3774443750987e-06	-0.548889	0.983	0.976	0.136324	ASDC	RPL30
5.39413380621926e-06	4.28378	0.05	0.006	0.136747	ASDC	WNT10A
5.64119863985703e-06	-6.73291	0	0.261	0.14301	ASDC	CAMK4
5.79777491478194e-06	4.14339	0.033	0.003	0.146979	ASDC	B3GALNT1
5.81141090721553e-06	3.45428	0.083	0.014	0.147325	ASDC	PRXL2A
5.88623382939217e-06	-3.80187	0.017	0.289	0.149222	ASDC	SYNE2
5.9096096498129e-06	-2.13988	0.05	0.342	0.149815	ASDC	GIMAP1
5.97479945725749e-06	0.378737	0.983	0.975	0.151467	ASDC	ACTB
6.02269003127646e-06	6.38623	0.017	0.001	0.152681	ASDC	MALRD1
6.13206406329072e-06	-2.2225	0.017	0.292	0.155454	ASDC	LBH
6.19261227807958e-06	-1.08372	0.2	0.539	0.156989	ASDC	SNHG6
6.22046508837475e-06	3.42816	0.117	0.026	0.157695	ASDC	ZFAT
6.31860680646405e-06	2.06124	0.317	0.136	0.160183	ASDC	PDIA4
6.4465573434306e-06	-0.5781	0.95	0.955	0.163427	ASDC	RPS19
6.74992994385379e-06	4.37617	0.017	0.001	0.171117	ASDC	FAM71E1
6.75911919941042e-06	-3.27123	0.05	0.321	0.17135	ASDC	STK17A
7.21245273189032e-06	2.7986	0.117	0.026	0.182843	ASDC	AKAP1
7.2563295357954e-06	-1.43303	0.183	0.472	0.183955	ASDC	ZFP36L1
7.61304815321635e-06	-0.413641	0.983	0.974	0.192998	ASDC	RPL28
7.61793834746717e-06	2.95489	0.067	0.01	0.193122	ASDC	HIST1H1B
7.66239289829745e-06	-1.24983	0.15	0.465	0.194249	ASDC	HLA-F
7.80105434679229e-06	-0.6275	0.3	0.637	0.197765	ASDC	SRSF5
7.83306453241019e-06	5.29543	0.017	0.001	0.198576	ASDC	AC072022.1
7.87347005215653e-06	-0.973439	0.167	0.501	0.1996	ASDC	VAMP2
8.12587088436166e-06	3.99395	0.033	0.003	0.205999	ASDC	DUXAP8
8.46096771887485e-06	1.73582	0.417	0.209	0.214494	ASDC	SYK
8.4647525689694e-06	7.11062	0.017	0.001	0.21459	ASDC	SUCNR1
8.51846436874473e-06	4.96125	0.017	0.001	0.215952	ASDC	ZNF252P-AS1
8.96902022456953e-06	1.70153	0.4	0.197	0.227374	ASDC	CAPG
9.06778946518556e-06	0.539026	0.783	0.407	0.229878	ASDC	TYROBP
9.27000906712656e-06	-5.325	0.017	0.274	0.235004	ASDC	NKG7
9.93301504250518e-06	2.09598	0.4	0.21	0.251812	ASDC	TM9SF2
9.97875717931193e-06	5.87926	0.017	0.001	0.252971	ASDC	VPS13A-AS1
1.02428596552899e-05	3.98133	0.017	0.001	0.259667	ASDC	FMR1-IT1
1.0834808664917e-05	-1.4195	0.133	0.431	0.274673	ASDC	CUTA
1.09234772310829e-05	-0.703178	0.883	0.951	0.276921	ASDC	RPS18
1.09796847616405e-05	4.83653	0.033	0.003	0.278346	ASDC	FOXRED2
1.10368114414649e-05	3.80206	0.067	0.01	0.279794	ASDC	NUDT17
1.11223989021197e-05	4.19359	0.017	0.001	0.281964	ASDC	AL158825.2
1.11936743178963e-05	-1.06657	0.217	0.538	0.283771	ASDC	IL2RG
1.13850112384067e-05	2.16588	0.233	0.081	0.288621	ASDC	CSF2RA
1.16337338574354e-05	-3.78848	0.033	0.295	0.294927	ASDC	LEF1
1.16983378797358e-05	-1.09965	0.25	0.549	0.296565	ASDC	ARL6IP5
1.21132151651239e-05	2.11437	0.133	0.033	0.307082	ASDC	GAB1
1.21440808741797e-05	1.69688	0.383	0.188	0.307865	ASDC	MEF2C
1.23971845074798e-05	4.97979	0.033	0.003	0.314281	ASDC	CIB2
1.2677592305944e-05	-0.642696	0.2	0.502	0.32139	ASDC	ANP32B
1.26863278102631e-05	5.19356	0.017	0.001	0.321611	ASDC	WDR66
1.30211788554019e-05	-2.05087	0.05	0.324	0.3301	ASDC	YPEL3
1.34678282349215e-05	3.07573	0.05	0.006	0.341423	ASDC	RBMS3
1.35913353980377e-05	2.90917	0.067	0.01	0.344554	ASDC	SERPING1
1.36334701290775e-05	6.9569	0.017	0.001	0.345622	ASDC	TRIP13
1.38996741686563e-05	4.27989	0.017	0.001	0.352371	ASDC	ZNF571-AS1
1.42276892142933e-05	-1.05272	0.367	0.697	0.360686	ASDC	IFITM2
1.43472811745664e-05	-6.75978	0	0.244	0.363718	ASDC	INPP4B
1.49865612251425e-05	4.1507	0.017	0.001	0.379924	ASDC	ALPK3
1.51224277575522e-05	-3.52083	0.067	0.325	0.383369	ASDC	MAML2
1.63747114410997e-05	-1.61588	0.117	0.406	0.415115	ASDC	GYPC
1.69694292383189e-05	-1.96647	0.117	0.399	0.430192	ASDC	CYTH1
1.7454409614425e-05	3.13425	0.183	0.059	0.442487	ASDC	ZDHHC4
1.75442906559592e-05	1.88674	0.35	0.166	0.444765	ASDC	CTSZ
1.75826184681284e-05	-2.23378	0.067	0.331	0.445737	ASDC	SIGIRR
1.75904426444029e-05	-3.44401	0.017	0.269	0.445935	ASDC	TRBC1
1.77342680580492e-05	-1.19419	0.2	0.508	0.449581	ASDC	LY6E
1.80868634378522e-05	-1.10569	0.217	0.517	0.45852	ASDC	C12orf57
1.81585783835571e-05	-3.41372	0.033	0.285	0.460338	ASDC	HMGB2
1.82186861617157e-05	3.3598	0.083	0.015	0.461862	ASDC	TLR7
1.93759534577084e-05	2.28698	0.067	0.01	0.4912	ASDC	AL138756.1
1.97229552847314e-05	-3.34518	0.067	0.314	0.499997	ASDC	AAK1
2.05492809023997e-05	-2.93747	0.017	0.268	0.520945	ASDC	PIM1
2.13952605394377e-05	4.58619	0.017	0.001	0.542391	ASDC	SRGAP2-AS1
2.19645492422754e-05	-1.47487	0.133	0.426	0.556823	ASDC	PRMT2
2.24537987822119e-05	-0.665634	0.533	0.807	0.569226	ASDC	FXYD5
2.26787070959752e-05	-1.69405	0.2	0.46	0.574928	ASDC	ANKRD44
2.29739235365634e-05	-0.516445	0.667	0.902	0.582412	ASDC	UBA52
2.29839147885345e-05	-4.99775	0.017	0.254	0.582665	ASDC	ITK
2.42794490898635e-05	-0.897107	0.267	0.56	0.615508	ASDC	PRR13
2.44549234891962e-05	-0.657365	0.583	0.845	0.619957	ASDC	ARHGDIB
2.45340783479058e-05	0.523854	0.883	0.883	0.621963	ASDC	SERF2
2.49867669611328e-05	-1.61946	0.167	0.445	0.63344	ASDC	NOSIP
2.52221100903802e-05	-2.51596	0.033	0.283	0.639406	ASDC	ICAM2
2.53177125634766e-05	3.09691	0.133	0.035	0.641829	ASDC	FLNB
2.53407574206587e-05	-5.79123	0	0.232	0.642414	ASDC	RASAL3
2.64427344257142e-05	4.17897	0.05	0.006	0.67035	ASDC	GUCY1B1
2.72101167505868e-05	-1.57682	0.117	0.394	0.689804	ASDC	CYTIP
2.73239397560791e-05	4.32953	0.033	0.003	0.692689	ASDC	FAM81A
2.7685985231152e-05	2.47506	0.333	0.16	0.701867	ASDC	UBE2J1
2.78688690208303e-05	5.50703	0.033	0.003	0.706504	ASDC	AL672277.1
2.83692660872786e-05	4.27385	0.017	0.001	0.719189	ASDC	RIBC1
2.87072395325432e-05	2.28994	0.3	0.134	0.727757	ASDC	LAIR1
2.97389423239678e-05	6.05973	0.017	0.001	0.753912	ASDC	PLEKHD1
3.05305921328202e-05	-1.90135	0.117	0.387	0.773981	ASDC	EPC1
3.12301809295213e-05	3.15603	0.05	0.007	0.791716	ASDC	LINC02613
3.15510248053258e-05	-2.52038	0.05	0.307	0.79985	ASDC	SPOCK2
3.28022813182017e-05	5.22059	0.033	0.003	0.831571	ASDC	ALG1L2
3.4029765752963e-05	-1.30461	0.117	0.391	0.862689	ASDC	NFKBIA
3.51992683040406e-05	5.01891	0.033	0.003	0.892337	ASDC	PHYHD1
3.75444260232068e-05	-6.02551	0	0.224	0.951789	ASDC	MYC
3.82679701232023e-05	-0.545127	0.95	0.961	0.970131	ASDC	RPS3
3.83537635601017e-05	-7.78619	0	0.224	0.972306	ASDC	PRF1
3.88676262967415e-05	1.01113	0.5	0.292	0.985333	ASDC	LYN
3.9808317305519e-05	-2.27456	0.083	0.338	1	ASDC	CXCR4
4.01703513886518e-05	-1.29985	0.2	0.482	1	ASDC	MSN
4.07549012764556e-05	5.54781	0.033	0.003	1	ASDC	UHRF1
4.15356616788078e-05	-3.52376	0.017	0.251	1	ASDC	CD27
4.34149065212636e-05	-4.10318	0.017	0.247	1	ASDC	CST7
4.36370419515899e-05	-2.09084	0.033	0.283	1	ASDC	SYTL1
4.36412803818182e-05	5.3551	0.017	0.001	1	ASDC	AL672310.1
4.57012053842789e-05	-0.512947	1	0.993	1	ASDC	B2M
4.60285212903234e-05	-4.89108	0.017	0.243	1	ASDC	GZMA
4.60522194819794e-05	-2.23083	0.15	0.393	1	ASDC	FYN
4.640392053308e-05	5.3153	0.017	0.001	1	ASDC	RGPD5
4.79139072431062e-05	3.53586	0.05	0.007	1	ASDC	PRC1
4.90137985090481e-05	-1.66599	0.133	0.401	1	ASDC	TBC1D10C
4.91126463365086e-05	6.08833	0.017	0.001	1	ASDC	SRD5A3-AS1
4.91935228720847e-05	5.40226	0.017	0.001	1	ASDC	AL159169.2
4.96148651267725e-05	-6.08845	0	0.219	1	ASDC	MAL
4.97750137418589e-05	-0.841957	0.45	0.74	1	ASDC	ZFP36L2
5.0172896213104e-05	-0.61089	0.7	0.922	1	ASDC	MT-CYB
5.0420403464821e-05	-2.82337	0.067	0.303	1	ASDC	CTSW
5.05048427771648e-05	3.73097	0.017	0.001	1	ASDC	SMG7-AS1
5.05875773632178e-05	-1.2933	0.283	0.543	1	ASDC	RAP1B
5.07989731162879e-05	4.85179	0.05	0.007	1	ASDC	SDSL
5.27355938883132e-05	-1.38045	0.117	0.381	1	ASDC	ATM
5.28413853738493e-05	0.930052	0.183	0.058	1	ASDC	IGHM
5.32065413322819e-05	-0.69573	0.583	0.894	1	ASDC	MT-ND3
5.44296142957639e-05	1.37743	0.6	0.503	1	ASDC	SAMHD1
5.80887025969357e-05	-3.69405	0.033	0.261	1	ASDC	PACS1
6.00251621698149e-05	-3.21353	0.067	0.292	1	ASDC	DOK2
6.14341721817558e-05	-0.620394	0.95	0.966	1	ASDC	RPS27
6.19926523111964e-05	2.55992	0.15	0.045	1	ASDC	LRRK1
6.21633749425286e-05	-0.407722	0.917	0.96	1	ASDC	RPS15
6.21905268337322e-05	1.41192	0.4	0.221	1	ASDC	FCGRT
6.26321787233527e-05	-0.834151	0.583	0.81	1	ASDC	MT-ND4L
6.50020017159349e-05	-1.67189	0.083	0.329	1	ASDC	ARHGAP45
6.64710487772208e-05	2.61764	0.083	0.017	1	ASDC	CCDC200
6.68163363173132e-05	4.17045	0.017	0.001	1	ASDC	BUB1B
6.82982361226181e-05	2.30867	0.25	0.103	1	ASDC	CXXC5
6.93332704985108e-05	6.55687	0.017	0.001	1	ASDC	ADGRG2
7.02000564613485e-05	-1.71676	0.083	0.324	1	ASDC	EPB41
7.06529977434905e-05	-1.08982	0.233	0.516	1	ASDC	CD44
7.1103101152503e-05	-1.13029	0.1	0.35	1	ASDC	MPHOSPH8
7.14898342287571e-05	-2.71609	0.05	0.28	1	ASDC	DIAPH1
7.16850327531908e-05	3.87468	0.033	0.003	1	ASDC	SMOX
7.32854479033508e-05	-0.748974	0.4	0.707	1	ASDC	YWHAB
7.44950249849002e-05	-2.53272	0.067	0.305	1	ASDC	EML4
7.53890455930318e-05	-0.543025	0.4	0.735	1	ASDC	PNRC1
7.74040236087956e-05	6.43081	0.017	0.001	1	ASDC	ACBD3-AS1
7.7495094229259e-05	5.73207	0.017	0.001	1	ASDC	CERS6-AS1
7.78146398502241e-05	5.07415	0.017	0.001	1	ASDC	PRKD1
7.90743582994048e-05	3.66581	0.017	0.001	1	ASDC	AF064858.1
7.95545065701317e-05	-2.18736	0.117	0.352	1	ASDC	NCOR1
7.96028398751331e-05	-0.509238	0.2	0.51	1	ASDC	CDC42
8.21630211977821e-05	4.8714	0.017	0.001	1	ASDC	AL353748.3
8.48291688119583e-05	-1.94426	0.083	0.331	1	ASDC	SSU72
8.63575623508976e-05	-2.23783	0.05	0.285	1	ASDC	CLEC2B
8.99146721937141e-05	2.15852	0.35	0.193	1	ASDC	PHB
9.09423769894362e-05	6.00589	0.017	0.001	1	ASDC	LRP1B
9.10860854091386e-05	-2.85643	0.117	0.337	1	ASDC	AOAH
9.24680703019644e-05	-3.82749	0.033	0.254	1	ASDC	PDE3B
9.26561460149002e-05	3.95538	0.017	0.001	1	ASDC	AF131215.2
9.32092013415982e-05	-4.40757	0.017	0.227	1	ASDC	PBXIP1
9.44726602775733e-05	-6.11498	0	0.205	1	ASDC	TXK
9.50472999622838e-05	5.54931	0.033	0.004	1	ASDC	RGS16
9.52063260428543e-05	2.11306	0.4	0.232	1	ASDC	CDK2AP2
9.53913705068954e-05	2.34575	0.183	0.064	1	ASDC	STX18
9.71455980585879e-05	4.41175	0.017	0.001	1	ASDC	C19orf81
0.000101519	4.47893	0.033	0.004	1	ASDC	TNFRSF17
0.000102856	1.56657	0.45	0.277	1	ASDC	HIST1H1E
0.000104692	3.65578	0.033	0.004	1	ASDC	FAM53A
0.000108026	-5.65498	0	0.203	1	ASDC	PIM2
0.000109232	3.48203	0.017	0.001	1	ASDC	CPEB2-DT
0.000112413	4.59956	0.017	0.001	1	ASDC	TFPI
0.000112703	-8.59268	0.017	0.223	1	ASDC	GNLY
0.000114827	0.948527	0.017	0.001	1	ASDC	IGKV1-6
0.000117462	-1.17232	0.183	0.434	1	ASDC	TCF25
0.000117482	5.42859	0.017	0.001	1	ASDC	DIPK1B
0.000122926	2.43297	0.2	0.077	1	ASDC	CXCR3
0.000123775	4.78043	0.017	0.001	1	ASDC	PNLDC1
0.000126897	-4.29666	0.033	0.243	1	ASDC	BCL2
0.000127244	-3.10463	0.067	0.283	1	ASDC	RASA3
0.00012762	1.79235	0.267	0.118	1	ASDC	HDAC9
0.000136052	1.43773	0.583	0.485	1	ASDC	SLC25A5
0.000138989	-4.47084	0.017	0.221	1	ASDC	RORA
0.00014026	-0.617433	0.033	0.261	1	ASDC	RASA2
0.00014935	-2.85448	0.033	0.248	1	ASDC	TUBA4A
0.000149491	5.67814	0.017	0.001	1	ASDC	AC093525.4
0.000150516	-1.5031	0.083	0.319	1	ASDC	PTPRCAP
0.000152138	1.94608	0.317	0.158	1	ASDC	SPINT2
0.000152182	1.99693	0.467	0.326	1	ASDC	CTSC
0.000152688	4.95822	0.033	0.004	1	ASDC	TIGD3
0.000158136	4.41678	0.017	0.001	1	ASDC	AC026191.1
0.000163247	-1.81981	0.183	0.412	1	ASDC	SSH2
0.00016343	-0.912478	0.183	0.461	1	ASDC	NSA2
0.000165027	-3.88868	0.033	0.237	1	ASDC	SYNE1
0.000167963	3.49264	0.017	0.001	1	ASDC	AL162414.1
0.000169976	-1.43327	0.067	0.285	1	ASDC	S1PR4
0.000170365	-1.27641	0.183	0.455	1	ASDC	NEAT1
0.000170541	2.95124	0.1	0.025	1	ASDC	ST3GAL4
0.000172373	-1.2596	0.317	0.572	1	ASDC	FOXP1
0.000174942	3.05891	0.183	0.067	1	ASDC	BTK
0.000175835	-4.43428	0.017	0.214	1	ASDC	ITM2A
0.000176407	4.34419	0.033	0.004	1	ASDC	GHRL
0.000177668	-4.32053	0.017	0.215	1	ASDC	OXNAD1
0.000178419	-0.415196	1	0.974	1	ASDC	RPL34
0.000181306	-0.988161	0.35	0.623	1	ASDC	RIPOR2
0.000182128	4.1615	0.017	0.001	1	ASDC	ENAH
0.000187415	1.30084	0.583	0.478	1	ASDC	ATP5MC3
0.000188148	-1.22008	0.133	0.366	1	ASDC	EIF2S3
0.000188826	1.76038	0.383	0.227	1	ASDC	NCOA4
0.000189228	-0.523373	0.533	0.831	1	ASDC	MT-ND2
0.000189602	1.40364	0.433	0.261	1	ASDC	CTSB
0.000190795	3.65473	0.05	0.008	1	ASDC	GAS6-AS1
0.000191366	-0.874615	0.2	0.474	1	ASDC	SOD1
0.000193933	3.05047	0.033	0.004	1	ASDC	ENPP2
0.000196917	-3.89204	0.017	0.216	1	ASDC	SLC2A3
0.000199092	-2.10649	0.05	0.264	1	ASDC	PSMB8-AS1
0.000201214	-4.22559	0.017	0.212	1	ASDC	UPP1
0.000201936	3.67759	0.017	0.001	1	ASDC	AC099568.2
0.000205536	-4.26524	0.017	0.213	1	ASDC	STAT4
0.000206201	2.35848	0.033	0.004	1	ASDC	ADGRA3
0.000206911	3.37066	0.067	0.013	1	ASDC	PDIA5
0.000209546	3.65984	0.017	0.001	1	ASDC	AC007879.3
0.000214389	5.81538	0.017	0.001	1	ASDC	LINC01238
0.000217368	-6.27323	0	0.188	1	ASDC	KLRK1
0.000218658	2.07857	0.283	0.135	1	ASDC	MYD88
0.000223284	2.37327	0.233	0.101	1	ASDC	MYCBP
0.000227033	4.15456	0.033	0.004	1	ASDC	TNFRSF11A
0.000229248	-0.322651	1	0.984	1	ASDC	RPL41
0.000230736	1.72873	0.1	0.025	1	ASDC	SPATS2L
0.000236592	2.66482	0.2	0.079	1	ASDC	ADA
0.000240364	-0.626007	0.567	0.825	1	ASDC	RPL38
0.000240437	-5.98119	0	0.186	1	ASDC	THEMIS
0.000241105	-1.3079	0.117	0.35	1	ASDC	RSRP1
0.0002432	-0.837199	0.233	0.52	1	ASDC	ARL6IP4
0.000244019	-5.59561	0	0.185	1	ASDC	SCML4
0.000244905	-1.85984	0.1	0.317	1	ASDC	PARP8
0.000245035	-2.9313	0.017	0.216	1	ASDC	CD6
0.000247366	-4.32004	0.017	0.208	1	ASDC	CD69
0.000248685	-2.81072	0.05	0.255	1	ASDC	NAP1L4
0.000249991	-0.80054	0.183	0.465	1	ASDC	CD53
0.000257681	4.23821	0.033	0.004	1	ASDC	LINC01480
0.000258864	-2.14489	0.05	0.263	1	ASDC	TMC8
0.000259093	-2.8666	0.033	0.236	1	ASDC	SYTL3
0.000264276	-2.01698	0.117	0.33	1	ASDC	CDC42SE1
0.000265036	-1.50118	0.083	0.304	1	ASDC	CBX3
0.000265859	-6.86321	0	0.183	1	ASDC	KLRB1
0.000274871	-5.66369	0	0.183	1	ASDC	IKZF3
0.000276216	-2.43364	0.1	0.311	1	ASDC	LINC01619
0.000277984	4.3171	0.033	0.004	1	ASDC	AL133227.1
0.000279831	2.51351	0.217	0.091	1	ASDC	RPS6KA4
0.000281389	2.29001	0.167	0.058	1	ASDC	GNG7
0.000287235	-0.581553	0.517	0.87	1	ASDC	MT-ND4
0.000296497	3.48717	0.017	0.001	1	ASDC	AC116913.1
0.000298216	2.37697	0.033	0.004	1	ASDC	EGFL8
0.000300171	-2.07122	0.15	0.359	1	ASDC	MYO1F
0.000306858	-0.790081	0.35	0.637	1	ASDC	HCST
0.000307126	-2.02605	0.033	0.236	1	ASDC	ADK
0.000307152	-1.02859	0.167	0.415	1	ASDC	CDC42SE2
0.000308358	-5.71901	0	0.18	1	ASDC	GBP5
0.000308675	-5.59451	0	0.18	1	ASDC	SUCLG2
0.000310169	-2.54258	0.05	0.255	1	ASDC	PLSCR3
0.00031155	-2.17936	0.067	0.279	1	ASDC	MACF1
0.000313123	-0.980879	0.167	0.41	1	ASDC	MBP
0.000319546	-1.56407	0.083	0.309	1	ASDC	PPP2R5C
0.00032218	2.87703	0.167	0.061	1	ASDC	STT3A
0.000323407	0.905654	0.7	0.717	1	ASDC	LSP1
0.000325625	2.28646	0.183	0.069	1	ASDC	RRAGC
0.000326718	3.95184	0.067	0.013	1	ASDC	TREX1
0.000328633	1.93831	0.4	0.258	1	ASDC	C17orf49
0.000329652	-0.596068	0.383	0.711	1	ASDC	UQCRB
0.000338871	-1.73444	0.1	0.319	1	ASDC	STK38
0.000340634	-2.12069	0.033	0.238	1	ASDC	R3HDM4
0.000341186	-5.66786	0	0.178	1	ASDC	AQP3
0.000343573	1.70328	0.133	0.041	1	ASDC	TCL1A
0.000352649	-6.50172	0	0.177	1	ASDC	HOPX
0.000353355	4.18781	0.017	0.001	1	ASDC	AP001469.3
0.000357741	-2.40507	0.033	0.231	1	ASDC	ADAM10
0.000362398	-3.12307	0.033	0.227	1	ASDC	BACH2
0.000363727	5.49058	0.017	0.001	1	ASDC	AC092757.2
0.000365764	-3.60255	0.017	0.204	1	ASDC	C5orf56
0.000367769	1.64337	0.183	0.069	1	ASDC	CIITA
0.000368356	-3.1602	0.017	0.206	1	ASDC	ABLIM1
0.000368922	2.64705	0.167	0.062	1	ASDC	CORO1C
0.000371084	-1.96886	0.05	0.251	1	ASDC	DENND2D
0.00037593	-1.79869	0.017	0.208	1	ASDC	CEP350
0.000383596	1.35768	0.383	0.22	1	ASDC	JAML
0.000388274	-3.71172	0.017	0.202	1	ASDC	ARID5B
0.000391613	-0.790616	0.417	0.7	1	ASDC	MBNL1
0.000391795	6.43129	0.017	0.001	1	ASDC	AC245052.4
0.000392514	-1.17975	0.167	0.399	1	ASDC	WIPF1
0.000396739	1.34247	0.3	0.145	1	ASDC	UBE2E2
0.000404966	-0.445826	0.417	0.739	1	ASDC	EIF3K
0.00041092	4.16265	0.017	0.001	1	ASDC	GUCY2D
0.000411171	3.34173	0.067	0.014	1	ASDC	SCARB1
0.000414198	1.85885	0.3	0.158	1	ASDC	USF2
0.000415336	-0.416551	0.867	0.947	1	ASDC	RPL8
0.0004176	-1.51481	0.1	0.322	1	ASDC	FAM107B
0.000421984	5.83309	0.017	0.001	1	ASDC	ADM5
0.000423934	1.73917	0.117	0.034	1	ASDC	RUBCNL
0.000427872	-3.81343	0.033	0.216	1	ASDC	PTPN4
0.000428641	-2.61656	0.033	0.224	1	ASDC	S1PR1
0.000438991	-1.41593	0.083	0.304	1	ASDC	DYNLT1
0.000442592	1.75978	0.2	0.081	1	ASDC	DPYSL2
0.000444375	1.88672	0.067	0.014	1	ASDC	FAAH
0.000444938	3.35072	0.033	0.004	1	ASDC	AC093019.2
0.000451561	2.6784	0.15	0.053	1	ASDC	SPNS3
0.000451617	3.39106	0.017	0.001	1	ASDC	S100A2
0.000452721	-5.69079	0	0.172	1	ASDC	TNIK
0.000454631	-3.01354	0.033	0.223	1	ASDC	CCDC88C
0.000461052	4.02809	0.017	0.001	1	ASDC	CFAP57
0.000468994	-1.50673	0.05	0.244	1	ASDC	CDKN1B
0.000469177	1.85128	0.367	0.206	1	ASDC	CIAO2A
0.000473138	-0.798284	0.167	0.412	1	ASDC	FOXN3
0.000474009	-0.398039	1	0.97	1	ASDC	RPS15A
0.00048185	3.68719	0.017	0.001	1	ASDC	AL078622.1
0.000485324	3.22249	0.067	0.014	1	ASDC	CLEC10A
0.000504496	-1.4985	0.1	0.315	1	ASDC	MYO1G
0.000505197	-1.0882	0.05	0.254	1	ASDC	MZT2A
0.000505228	5.53388	0.017	0.001	1	ASDC	AC145212.1
0.000509269	-1.17931	0.167	0.386	1	ASDC	TMEM123
0.000511481	-2.59747	0.067	0.265	1	ASDC	ATP2B1
0.000512203	-0.484203	0.483	0.775	1	ASDC	TOMM7
0.000516964	1.8836	0.167	0.062	1	ASDC	NDRG1
0.000521123	-1.86879	0.067	0.26	1	ASDC	GPS2
0.000522669	6.4446	0.017	0.001	1	ASDC	LINC01144
0.000532811	-2.47284	0.017	0.2	1	ASDC	PRKCQ
0.000533587	3.70018	0.017	0.001	1	ASDC	KLF1
0.000535532	-1.52897	0.15	0.364	1	ASDC	RPS4Y1
0.000536822	-2.18017	0.067	0.26	1	ASDC	RNF167
0.000543307	2.23364	0.2	0.082	1	ASDC	GSN
0.00055105	-3.22294	0.033	0.215	1	ASDC	SH3BP5
0.000556811	-1.98546	0.05	0.246	1	ASDC	SLFN5
0.000570161	3.35158	0.117	0.036	1	ASDC	KCTD5
0.000572003	-0.750263	0.283	0.518	1	ASDC	MYH9
0.000575533	1.2907	0.6	0.558	1	ASDC	SUB1
0.000580309	-1.16384	0.083	0.305	1	ASDC	RBMS1
0.000589296	-4.04781	0.017	0.189	1	ASDC	STMN3
0.000609316	2.5592	0.083	0.021	1	ASDC	EGLN3
0.000613262	-2.76011	0.017	0.196	1	ASDC	TRAC
0.000613336	-0.745626	0.167	0.41	1	ASDC	WAS
0.000615359	4.17423	0.05	0.009	1	ASDC	PFKFB2
0.000620951	3.72862	0.05	0.009	1	ASDC	KCNH8
0.000621885	3.27251	0.05	0.009	1	ASDC	HIST1H4E
0.000625723	-1.72119	0.067	0.269	1	ASDC	IGBP1
0.000636405	1.66764	0.05	0.009	1	ASDC	KCTD3
0.00063643	-1.40806	0.1	0.308	1	ASDC	SHISA5
0.000641248	5.21393	0.017	0.001	1	ASDC	SMARCA1
0.000658679	-3.01515	0.083	0.27	1	ASDC	CCL5
0.000661634	0.771913	0.833	0.836	1	ASDC	MYL6
0.000662699	5.1794	0.017	0.001	1	ASDC	GTF2IRD1
0.000668456	-5.67386	0	0.163	1	ASDC	PYHIN1
0.000669951	-0.950872	0.15	0.374	1	ASDC	TNFAIP8
0.000676668	0.590877	0.733	0.763	1	ASDC	ARPC3
0.00067742	-1.92524	0.033	0.216	1	ASDC	R3HDM2
0.0006878	-5.67211	0	0.163	1	ASDC	SAMD3
0.000689056	-1.24692	0.1	0.312	1	ASDC	ZC3HAV1
0.000689643	3.60146	0.067	0.015	1	ASDC	PTPRO
0.000705112	1.9098	0.15	0.053	1	ASDC	KLF4
0.000706686	-0.424231	0.85	0.917	1	ASDC	RPL9
0.000708728	-0.881257	0.167	0.386	1	ASDC	SNU13
0.000724697	-0.614235	0.267	0.529	1	ASDC	ZFAS1
0.000734589	-1.34071	0.233	0.47	1	ASDC	DPYD
0.000738982	2.78291	0.15	0.055	1	ASDC	GPATCH11
0.000742714	-0.558767	0.3	0.579	1	ASDC	EIF3G
0.000749657	-0.446406	0.967	0.973	1	ASDC	RPL32
0.00075256	5.32533	0.017	0.001	1	ASDC	BX842570.1
0.000753252	-5.38694	0	0.16	1	ASDC	TRAT1
0.000779173	4.76719	0.017	0.001	1	ASDC	AC008764.7
0.000791227	-1.23501	0.067	0.268	1	ASDC	UBAC2
0.000794008	2.50378	0.067	0.015	1	ASDC	UBTD2
0.000798642	-4.10737	0.017	0.182	1	ASDC	RNF125
0.000798906	-0.92707	0.133	0.362	1	ASDC	MCUB
0.000809749	-1.19013	0.167	0.383	1	ASDC	CTSD
0.000817584	-2.79311	0.017	0.189	1	ASDC	TESPA1
0.000826876	5.20339	0.017	0.001	1	ASDC	MIPOL1
0.000834085	1.12823	0.7	0.71	1	ASDC	SRP14
0.00083628	1.71379	0.233	0.108	1	ASDC	TNFSF13
0.000841364	-0.495748	0.15	0.383	1	ASDC	LDHA
0.000849144	3.0146	0.117	0.037	1	ASDC	MOB1B
0.000852581	3.13597	0.017	0.001	1	ASDC	TREML4
0.00085275	1.73049	0.317	0.18	1	ASDC	NENF
0.000861659	3.26804	0.083	0.022	1	ASDC	NAALADL2
0.000864347	-2.00657	0.033	0.217	1	ASDC	PXN
0.000866321	-2.23223	0.067	0.255	1	ASDC	ARHGEF3
0.000869402	1.53005	0.433	0.307	1	ASDC	CANX
0.000874448	1.93739	0.25	0.118	1	ASDC	ITGAE
0.00089006	2.70988	0.1	0.029	1	ASDC	ABHD17B
0.000894982	2.12641	0.067	0.015	1	ASDC	ZEB2-AS1
0.000914653	-1.28431	0.133	0.353	1	ASDC	RBL2
0.000925696	2.59621	0.083	0.022	1	ASDC	MILR1
0.000956817	-1.10092	0.15	0.358	1	ASDC	TNRC6B
0.000961454	-0.980898	0.2	0.409	1	ASDC	KMT2E
0.00096887	2.39924	0.15	0.056	1	ASDC	CYSTM1
0.000980519	3.54643	0.017	0.001	1	ASDC	WDR31
0.000982106	2.32212	0.25	0.123	1	ASDC	A1BG
0.000990141	5.1059	0.017	0.001	1	ASDC	RBPMS
0.000999685	2.93998	0.1	0.029	1	ASDC	GLCE
0.00101192	-2.92117	0.05	0.221	1	ASDC	DNAJB1
0.00102311	4.50856	0.017	0.001	1	ASDC	AL157369.1
0.00103082	-1.22435	0.167	0.377	1	ASDC	EVI2B
0.00103314	-1.32417	0.167	0.379	1	ASDC	SF3B1
0.00103999	-1.51519	0.017	0.185	1	ASDC	CEP85L
0.00104711	3.20404	0.017	0.001	1	ASDC	AC005838.2
0.00105763	-0.850737	0.217	0.456	1	ASDC	CAST
0.00105823	-3.17898	0.033	0.199	1	ASDC	MFNG
0.00105872	2.211	0.083	0.022	1	ASDC	DSN1
0.00106415	-0.670163	0.233	0.465	1	ASDC	RCSD1
0.00108416	4.50433	0.017	0.001	1	ASDC	STK31
0.00109512	-1.76298	0.1	0.293	1	ASDC	U2SURP
0.00114522	4.60291	0.017	0.001	1	ASDC	AL356966.1
0.00115206	-3.26284	0.017	0.18	1	ASDC	TLK1
0.00116548	-0.493488	0.217	0.492	1	ASDC	ANAPC16
0.0011825	3.10863	0.05	0.01	1	ASDC	NEGR1
0.00118355	-0.406082	0.883	0.957	1	ASDC	RPS21
0.001184	4.07492	0.017	0.001	1	ASDC	LINC02641
0.00118875	-2.5616	0.067	0.238	1	ASDC	PRPF38B
0.00119802	1.66244	0.417	0.27	1	ASDC	TMED10
0.00120434	3.34651	0.017	0.001	1	ASDC	AC090921.1
0.0012065	3.24807	0.017	0.001	1	ASDC	CLEC20A
0.00121368	-0.464505	0.333	0.615	1	ASDC	CNBP
0.00121969	-2.30591	0.067	0.242	1	ASDC	AGTRAP
0.00123137	-0.423767	1	0.975	1	ASDC	RPL13
0.00123781	-3.35425	0.033	0.196	1	ASDC	SP3
0.00123887	3.25298	0.017	0.001	1	ASDC	AC090630.1
0.00124738	-1.33468	0.067	0.256	1	ASDC	SEMA4D
0.00125767	-0.797875	0.117	0.331	1	ASDC	PPP1R18
0.00126575	-1.9138	0.033	0.202	1	ASDC	CDC25B
0.00127848	-3.12432	0.033	0.199	1	ASDC	PLCB1
0.00128452	2.83308	0.033	0.005	1	ASDC	CCDC153
0.00128617	-1.90099	0.017	0.18	1	ASDC	RUNX3
0.00130864	-0.809673	0.383	0.623	1	ASDC	ITGB2
0.00133326	-0.671865	0.15	0.375	1	ASDC	HNRNPA0
0.00133639	2.3008	0.083	0.022	1	ASDC	UCK2
0.00133696	-0.46703	0.317	0.58	1	ASDC	SSR2
0.00133768	-5.58096	0	0.147	1	ASDC	CISH
0.00135299	2.1412	0.2	0.09	1	ASDC	CD2AP
0.00135631	-1.03286	0.05	0.231	1	ASDC	WAC
0.00138297	3.35711	0.017	0.001	1	ASDC	SUN3
0.00138567	2.09901	0.033	0.005	1	ASDC	LAMC1
0.00138592	-2.81586	0.05	0.218	1	ASDC	TMEM131L
0.00139755	1.96569	0.25	0.125	1	ASDC	UNC119
0.00140359	-0.915759	0.3	0.532	1	ASDC	JUNB
0.0014179	-0.483021	0.783	0.892	1	ASDC	RPS26
0.00143852	-2.55369	0.033	0.201	1	ASDC	LINC01138
0.00144169	-3.62586	0.017	0.171	1	ASDC	SNHG25
0.00145167	3.2427	0.017	0.001	1	ASDC	BAALC-AS1
0.00145194	-0.762148	0.15	0.369	1	ASDC	CHURC1
0.00146858	2.62749	0.217	0.104	1	ASDC	NME4
0.00146898	1.01298	0.65	0.62	1	ASDC	CALM2
0.00148627	3.4135	0.017	0.001	1	ASDC	AC010761.1
0.00151673	2.90242	0.133	0.049	1	ASDC	FKBP2
0.00152329	-1.4906	0.05	0.222	1	ASDC	BTN3A2
0.00152787	2.02799	0.3	0.172	1	ASDC	CYTH4
0.00157839	-1.04225	0.183	0.389	1	ASDC	RAP1A
0.00158501	-2.10275	0.05	0.222	1	ASDC	GBP2
0.00159746	-5.02864	0	0.143	1	ASDC	UBE2G1
0.00160622	3.23718	0.1	0.032	1	ASDC	CBFA2T3
0.00161075	3.00709	0.033	0.005	1	ASDC	SPRED2
0.00161248	-0.440475	0.883	0.942	1	ASDC	RPL21
0.00162013	-5.23337	0	0.143	1	ASDC	BIRC3
0.00163424	0.698295	0.767	0.833	1	ASDC	PPIA
0.00163937	-3.54463	0.017	0.168	1	ASDC	RPP21
0.00164561	-1.47483	0.133	0.343	1	ASDC	DOCK10
0.00164753	-0.880418	0.183	0.397	1	ASDC	EIF4A2
0.00165552	3.21224	0.017	0.001	1	ASDC	TNKS2-AS1
0.00166275	4.32571	0.017	0.001	1	ASDC	RHOXF1-AS1
0.00168144	1.05209	0.667	0.71	1	ASDC	S100A10
0.00168756	-3.09508	0.033	0.191	1	ASDC	LIMS1
0.00168888	-2.30468	0.083	0.254	1	ASDC	ID2
0.00168907	-1.16512	0.333	0.565	1	ASDC	ARHGAP15
0.00170037	4.70775	0.017	0.001	1	ASDC	AD001527.1
0.00171274	-5.18426	0	0.142	1	ASDC	CYTOR
0.00171487	3.32194	0.083	0.023	1	ASDC	FEN1
0.00171789	-3.75959	0.017	0.166	1	ASDC	SYPL1
0.00173234	-0.971282	0.1	0.295	1	ASDC	GNG2
0.00174091	-2.35113	0.083	0.252	1	ASDC	CYLD
0.00176886	-5.43146	0	0.141	1	ASDC	KLRG1
0.00177444	-5.1367	0	0.141	1	ASDC	RNF19A
0.00177508	-1.91703	0.083	0.26	1	ASDC	ITSN2
0.0017826	0.946255	0.567	0.484	1	ASDC	GNG5
0.00179015	-1.73933	0.033	0.196	1	ASDC	CALCOCO2
0.00179688	-0.502615	0.45	0.686	1	ASDC	GMFG
0.00183828	3.05813	0.067	0.016	1	ASDC	TP53I3
0.00185337	2.84423	0.05	0.01	1	ASDC	NAV1
0.00186177	-2.63047	0.083	0.248	1	ASDC	DUSP1
0.00186605	-5.28491	0	0.14	1	ASDC	SH2D2A
0.00188517	-0.472231	0.233	0.503	1	ASDC	UBXN1
0.00189757	-1.39462	0.017	0.171	1	ASDC	DYM
0.00190246	3.43759	0.017	0.001	1	ASDC	LINC01226
0.00190412	1.90403	0.067	0.016	1	ASDC	SSX2IP
0.00191403	-5.12463	0	0.139	1	ASDC	TRABD2A
0.00194039	-3.32691	0.033	0.187	1	ASDC	DOCK11
0.00194092	-0.689563	0.15	0.359	1	ASDC	ACAP1
0.00195038	4.76021	0.033	0.005	1	ASDC	ATP2A1-AS1
0.00197217	-1.28449	0.2	0.398	1	ASDC	SQSTM1
0.00197274	-0.77069	0.183	0.403	1	ASDC	ELF1
0.00198312	-0.532045	0.417	0.669	1	ASDC	GPSM3
0.00199066	-0.533686	0.3	0.558	1	ASDC	NDUFA13
0.00199166	-0.476115	0.15	0.373	1	ASDC	SELENOW
0.00199916	-1.02746	0.133	0.33	1	ASDC	ARHGAP30
0.00200538	-0.499198	0.583	0.868	1	ASDC	MT-ND1
0.00201503	-5.49101	0	0.138	1	ASDC	SESN3
0.00202533	-0.760075	0.117	0.314	1	ASDC	NSD3
0.00202966	-5.03118	0	0.138	1	ASDC	STX16
0.00203973	-2.93843	0.033	0.187	1	ASDC	IFI27L2
0.00204613	-0.876158	0.117	0.309	1	ASDC	SORL1
0.00208044	-0.371741	0.467	0.775	1	ASDC	MT-ND5
0.00208217	2.05822	0.05	0.01	1	ASDC	KTI12
0.00208499	0.912561	0.467	0.313	1	ASDC	NCF1
0.00208951	-1.71627	0.083	0.257	1	ASDC	MRPL54
0.00209138	-3.64902	0.017	0.163	1	ASDC	ZBTB38
0.00210896	-0.671762	0.1	0.281	1	ASDC	STAT3
0.00214954	0.520219	0.917	0.853	1	ASDC	EEF1B2
0.00215553	5.34499	0.017	0.001	1	ASDC	RASD1
0.00215582	-0.323507	0.5	0.73	1	ASDC	PPDPF
0.00216369	4.42603	0.017	0.001	1	ASDC	AC004158.1
0.00216485	3.01945	0.017	0.001	1	ASDC	LINC01736
0.00216676	3.08613	0.017	0.001	1	ASDC	GIPC2
0.00219161	-2.4541	0.05	0.212	1	ASDC	CBLB
0.00219933	-2.9589	0.017	0.165	1	ASDC	PTGER2
0.00222714	1.92371	0.117	0.04	1	ASDC	ARHGAP31
0.00222952	-4.96523	0	0.136	1	ASDC	ASXL1
0.002249	-2.24964	0.033	0.189	1	ASDC	SHFL
0.00225715	-2.52613	0.033	0.188	1	ASDC	CAMK2D
0.00227222	-2.0956	0.067	0.228	1	ASDC	SMAP1
0.0022815	-2.98462	0.017	0.164	1	ASDC	SATB1
0.00231141	3.74284	0.033	0.005	1	ASDC	GPM6B
0.0023179	-1.56179	0.083	0.264	1	ASDC	DEF6
0.00233224	-1.92217	0.033	0.19	1	ASDC	KMT2A
0.00233395	-1.67771	0.083	0.259	1	ASDC	CEBPB
0.0023477	-4.84837	0	0.134	1	ASDC	CNIH4
0.00235222	-5.98198	0	0.134	1	ASDC	CD8A
0.00237617	-3.93823	0.017	0.16	1	ASDC	FCGR3A
0.00237624	1.87194	0.217	0.102	1	ASDC	PPP1R15A
0.00238335	2.8171	0.017	0.001	1	ASDC	MAP3K15
0.00238404	-4.93368	0	0.134	1	ASDC	PLEKHA1
0.00239436	-5.12104	0	0.134	1	ASDC	RPS6KA5
0.00239746	3.84668	0.033	0.005	1	ASDC	GATM
0.00241402	-1.28222	0.033	0.195	1	ASDC	ARIH2
0.00244757	-2.26143	0.05	0.208	1	ASDC	MRPL43
0.00247733	-0.520411	0.917	0.918	1	ASDC	RPL3
0.0024865	-0.999413	0.067	0.236	1	ASDC	PTPRA
0.00249575	-5.21085	0	0.133	1	ASDC	MPP7
0.0024959	-0.523019	0.15	0.356	1	ASDC	REX1BD
0.00250038	-2.5171	0.033	0.185	1	ASDC	DENND4A
0.00251857	-2.84206	0.033	0.183	1	ASDC	LDLRAP1
0.00254364	3.19903	0.017	0.002	1	ASDC	P2RY1
0.00254507	-2.47494	0.067	0.225	1	ASDC	CDC42EP3
0.00254984	-1.95264	0.083	0.247	1	ASDC	CASP1
0.00255388	2.06976	0.033	0.005	1	ASDC	RAVER2
0.00255602	3.51418	0.033	0.005	1	ASDC	ARHGAP42
0.00260886	-1.05986	0.05	0.209	1	ASDC	UBE2N
0.00264161	3.3891	0.017	0.002	1	ASDC	AC104506.1
0.00265467	-3.58545	0.017	0.158	1	ASDC	KLRD1
0.00266394	-0.683741	0.083	0.262	1	ASDC	DDX6
0.00267615	2.22529	0.05	0.01	1	ASDC	MPIG6B
0.0026963	-4.72411	0	0.131	1	ASDC	ZFAND2B
0.00271181	-0.497901	0.483	0.706	1	ASDC	HSPA8
0.00271245	-6.15181	0	0.131	1	ASDC	CCL4
0.00275012	-0.92987	0.117	0.297	1	ASDC	PIAS1
0.00276472	-1.65883	0.1	0.265	1	ASDC	ASAH1
0.00278846	2.27317	0.117	0.041	1	ASDC	FUT7
0.00279004	-1.02967	0.133	0.326	1	ASDC	ALKBH7
0.00282289	2.72824	0.117	0.042	1	ASDC	TARBP1
0.0028317	2.103	0.167	0.071	1	ASDC	FGD2
0.00285242	-3.15944	0.017	0.159	1	ASDC	CNST
0.00285684	-0.763341	0.2	0.403	1	ASDC	ITGA4
0.00285761	-0.100564	0.217	0.46	1	ASDC	NDUFS5
0.00286291	-3.95786	0.017	0.154	1	ASDC	PRKAG2
0.0028723	5.58649	0.017	0.002	1	ASDC	SELENOP
0.0028797	-0.685581	0.15	0.348	1	ASDC	IER2
0.00289367	1.51804	0.267	0.139	1	ASDC	HLA-DMB
0.0028993	-0.665588	0.25	0.467	1	ASDC	ATP5ME
0.00291519	-4.69452	0	0.129	1	ASDC	ATP6V0E2
0.00291725	2.51334	0.033	0.005	1	ASDC	LINC02802
0.00292663	-1.36682	0.083	0.256	1	ASDC	HSD17B11
0.00292904	-1.82651	0.033	0.185	1	ASDC	RB1CC1
0.00295436	-3.38719	0.017	0.155	1	ASDC	PHF1
0.00295731	2.84127	0.083	0.025	1	ASDC	IPO4
0.00296281	-2.09368	0.05	0.205	1	ASDC	NECAP2
0.00301551	-4.88306	0	0.129	1	ASDC	TRANK1
0.00303465	-0.324933	0.133	0.316	1	ASDC	TECR
0.003048	-4.76843	0	0.128	1	ASDC	EHD1
0.00306148	4.87949	0.017	0.002	1	ASDC	PDZK1
0.00307203	4.23493	0.017	0.002	1	ASDC	AC069234.1
0.00310955	-4.87953	0	0.128	1	ASDC	BTN3A1
0.00312098	2.65299	0.083	0.025	1	ASDC	SLC9A7
0.00312363	3.8929	0.033	0.005	1	ASDC	CCDC189
0.00313589	-2.08577	0.017	0.159	1	ASDC	SRSF1
0.00315405	1.67094	0.2	0.095	1	ASDC	DCPS
0.00317103	-1.65827	0.033	0.182	1	ASDC	IMPDH2
0.00318924	2.5661	0.05	0.011	1	ASDC	SLC1A4
0.00322783	-5.53855	0	0.127	1	ASDC	NELL2
0.00325543	4.75286	0.017	0.002	1	ASDC	AP001631.2
0.00327526	3.06314	0.117	0.043	1	ASDC	ATP13A2
0.00329211	-4.8788	0	0.127	1	ASDC	GBP4
0.00330038	-1.19343	0.117	0.29	1	ASDC	NR3C1
0.00330469	-1.05888	0.2	0.383	1	ASDC	NDFIP1
0.00332949	-0.732493	0.233	0.441	1	ASDC	LITAF
0.00333374	-1.16019	0.083	0.249	1	ASDC	LAMP1
0.00335478	-2.00869	0.033	0.182	1	ASDC	IL27RA
0.00336814	1.79207	0.25	0.136	1	ASDC	MLEC
0.00339962	-0.857496	0.15	0.335	1	ASDC	SNX6
0.00341738	-0.553178	0.05	0.218	1	ASDC	OCIAD2
0.00342838	-0.442459	0.083	0.27	1	ASDC	HSPB1
0.00342936	-2.02897	0.05	0.208	1	ASDC	ST6GAL1
0.00343752	-0.96871	0.083	0.247	1	ASDC	BAZ1A
0.00343811	1.14007	0.45	0.342	1	ASDC	CNPY3
0.00344891	-0.896586	0.067	0.235	1	ASDC	POLR3GL
0.00346291	2.25536	0.117	0.042	1	ASDC	ASPH
0.00348283	3.9934	0.033	0.006	1	ASDC	ZMYM4-AS1
0.00348692	2.53139	0.083	0.025	1	ASDC	HS3ST3B1
0.00348891	2.62197	0.083	0.025	1	ASDC	AL590764.1
0.0034965	-3.68768	0.017	0.151	1	ASDC	SUMF1
0.00352094	-3.27266	0.017	0.153	1	ASDC	FGFBP2
0.00352548	-2.27061	0.067	0.221	1	ASDC	KLF12
0.00356346	-0.104543	0.183	0.392	1	ASDC	MRPS21
0.00356873	1.55812	0.083	0.025	1	ASDC	EEF2K
0.00357456	2.24626	0.15	0.061	1	ASDC	LIMD1
0.00359579	-5.50055	0	0.124	1	ASDC	IL2RB
0.00363564	0.830426	0.583	0.508	1	ASDC	ATP6V0C
0.00367121	-1.0265	0.183	0.366	1	ASDC	CARD16
0.00368809	-0.686564	0.183	0.389	1	ASDC	SMAP2
0.00369069	3.86615	0.017	0.002	1	ASDC	AC159540.2
0.00370819	-4.88352	0	0.124	1	ASDC	TNFSF8
0.00371961	-4.93801	0	0.124	1	ASDC	RASGRP1
0.00375825	1.46305	0.283	0.163	1	ASDC	RAB11FIP1
0.00376851	1.47173	0.233	0.122	1	ASDC	ARHGAP17
0.00377883	-1.11976	0.083	0.246	1	ASDC	PHIP
0.00378363	-2.2575	0.017	0.154	1	ASDC	ERCC5
0.0038351	-0.381088	0.35	0.579	1	ASDC	TRIR
0.00383747	-0.575519	0.2	0.407	1	ASDC	RGS10
0.00384609	-0.174506	0.067	0.241	1	ASDC	RASSF5
0.0038592	-0.333912	0.983	0.969	1	ASDC	RPS27A
0.00386209	3.50291	0.017	0.002	1	ASDC	SIGLEC12
0.00388015	1.44762	0.483	0.374	1	ASDC	TUBB
0.0038921	-0.844222	0.1	0.263	1	ASDC	RSF1
0.00390067	-4.68643	0	0.123	1	ASDC	HSPA1A
0.00390615	1.30947	0.05	0.011	1	ASDC	DACH1
0.00393965	-3.02322	0.033	0.17	1	ASDC	RAB6A
0.00394288	0.385712	0.85	0.884	1	ASDC	ATP5F1E
0.00394609	-4.71153	0	0.122	1	ASDC	RBM38
0.00394888	-6.21582	0	0.122	1	ASDC	CD8B
0.00401579	2.46464	0.15	0.063	1	ASDC	ATG101
0.00406387	-0.554797	0.15	0.341	1	ASDC	RPS27L
0.00411142	0.744284	0.75	0.807	1	ASDC	RPS11
0.00411841	3.24893	0.017	0.002	1	ASDC	AC025175.2
0.00413691	-0.455968	0.333	0.558	1	ASDC	CCND3
0.004147	-2.32054	0.067	0.215	1	ASDC	TNFSF10
0.00416093	-0.30081	0.967	0.967	1	ASDC	TMSB10
0.0041731	-4.9481	0	0.121	1	ASDC	ITGA6
0.00422933	-2.86804	0.033	0.17	1	ASDC	MED15
0.00430111	-0.284858	0.817	0.961	1	ASDC	MT-CO2
0.0043101	2.84816	0.017	0.002	1	ASDC	HSD17B6
0.00434239	-0.882946	0.117	0.296	1	ASDC	LUC7L3
0.0043567	-0.742295	0.1	0.26	1	ASDC	CASP4
0.00439691	-1.37189	0.1	0.259	1	ASDC	DGUOK
0.00440964	-4.94734	0	0.12	1	ASDC	TNRC6C
0.00441681	-2.26914	0.017	0.151	1	ASDC	GATA3
0.00442201	3.30123	0.05	0.011	1	ASDC	PLCB3
0.00442316	-4.93774	0	0.12	1	ASDC	SENP7
0.00445508	-0.189291	0.183	0.39	1	ASDC	RABAC1
0.00446607	3.22523	0.033	0.006	1	ASDC	AC093484.3
0.00447984	1.53321	0.467	0.391	1	ASDC	SEC61G
0.00449454	3.35324	0.033	0.006	1	ASDC	AL022162.1
0.00450261	0.644139	0.5	0.333	1	ASDC	ZEB2
0.00451264	1.58159	0.317	0.19	1	ASDC	HSBP1
0.00451897	-0.458137	0.067	0.229	1	ASDC	RSBN1L
0.00452621	-0.333189	0.3	0.568	1	ASDC	APRT
0.00452809	4.05043	0.017	0.002	1	ASDC	SPEGNB
0.00453915	-4.59558	0	0.119	1	ASDC	NSMCE3
0.00455456	3.0732	0.017	0.002	1	ASDC	GAS1
0.00457007	1.83287	0.267	0.153	1	ASDC	OFD1
0.00457889	-1.95521	0.083	0.239	1	ASDC	COP1
0.00458205	-4.82837	0	0.119	1	ASDC	XPO6
0.00461289	-1.16372	0.133	0.314	1	ASDC	TNFRSF14
0.00461916	-1.1155	0.167	0.347	1	ASDC	ANP32A
0.00463079	-4.77234	0	0.118	1	ASDC	LPAR6
0.00467189	-0.877812	0.1	0.27	1	ASDC	MGST3
0.00469884	-1.7176	0.033	0.172	1	ASDC	CARD8
0.00473105	-2.51538	0.067	0.214	1	ASDC	SERINC5
0.00476006	-1.37018	0.067	0.225	1	ASDC	CD46
0.00486256	-1.38211	0.167	0.349	1	ASDC	ZBTB20
0.00487159	-0.447887	0.15	0.351	1	ASDC	ARID4B
0.00488918	-0.661814	0.15	0.335	1	ASDC	ATRX
0.00491605	-2.79502	0.033	0.168	1	ASDC	XAF1
0.00493627	-0.660778	0.233	0.434	1	ASDC	STK17B
0.00493969	-0.546713	0.133	0.306	1	ASDC	TBCB
0.0049612	-0.973112	0.05	0.199	1	ASDC	CDK5RAP3
0.00497745	-0.946698	0.05	0.201	1	ASDC	RNF216
0.00499451	2.09516	0.033	0.006	1	ASDC	NECTIN1
0.00503376	3.05565	0.017	0.002	1	ASDC	AC093249.2
0.00506413	-5.78948	0	0.116	1	ASDC	TSHZ2
0.00508957	3.08663	0.05	0.012	1	ASDC	LINC00893
0.00510622	-0.498455	0.217	0.415	1	ASDC	NEDD8
0.00510782	-0.772692	0.133	0.315	1	ASDC	PPP1R12A
0.00513166	-0.958858	0.083	0.248	1	ASDC	CTDSP1
0.00513226	-4.52195	0	0.116	1	ASDC	TBC1D10A
0.0051431	-4.76033	0	0.116	1	ASDC	REV3L
0.00515397	-0.853892	0.233	0.399	1	ASDC	UTRN
0.00515456	-0.232178	0.317	0.558	1	ASDC	NCL
0.00515745	-0.808753	0.133	0.318	1	ASDC	FLI1
0.00519372	4.42918	0.017	0.002	1	ASDC	RIMS3
0.00519762	-4.72834	0	0.116	1	ASDC	WDR37
0.00524773	-0.338214	0.917	0.923	1	ASDC	RPS9
0.00524983	-1.49792	0.067	0.218	1	ASDC	TSPAN14
0.00525386	0.192702	0.817	0.816	1	ASDC	S100A6
0.00526204	1.95337	0.217	0.114	1	ASDC	FEZ2
0.00526848	3.32024	0.067	0.018	1	ASDC	PDXP
0.00527554	4.95052	0.017	0.002	1	ASDC	AC015819.1
0.00527613	-1.08894	0.05	0.202	1	ASDC	HPCAL1
0.00529966	-4.65593	0	0.115	1	ASDC	MLLT6
0.00532389	-0.464774	0.15	0.347	1	ASDC	THRAP3
0.00536103	-3.01166	0.033	0.164	1	ASDC	CLDND1
0.00537338	-4.53994	0	0.115	1	ASDC	SMIM29
0.00545196	6.1409	0.017	0.002	1	ASDC	TPBG
0.00546091	1.68589	0.167	0.074	1	ASDC	NPC1
0.00547024	-1.04401	0.117	0.291	1	ASDC	TGOLN2
0.00547381	2.6224	0.1	0.035	1	ASDC	GNA15
0.00548006	-4.7246	0	0.114	1	ASDC	VPS37B
0.00555466	-0.241387	0.1	0.28	1	ASDC	KLF3
0.0056413	-4.70667	0	0.114	1	ASDC	AC245297.3
0.00566677	-2.14198	0.017	0.145	1	ASDC	ZNFX1
0.00570095	-4.65538	0	0.113	1	ASDC	CD82
0.0057139	-1.71137	0.05	0.189	1	ASDC	ATXN1
0.00572835	-0.29171	1	0.972	1	ASDC	RPL39
0.00574731	-3.39418	0.017	0.139	1	ASDC	ADAM8
0.00576776	1.04982	0.133	0.053	1	ASDC	MTHFR
0.00578125	-2.14863	0.117	0.26	1	ASDC	CEBPD
0.00578972	-0.51946	0.183	0.373	1	ASDC	PGAM1
0.00581747	2.09045	0.333	0.228	1	ASDC	DNAJA1
0.00584583	4.39274	0.017	0.002	1	ASDC	AC007608.3
0.00588598	-0.155392	0.183	0.412	1	ASDC	DDX17
0.00590173	-1.4125	0.083	0.23	1	ASDC	PNRC2
0.00592316	-0.534958	0.133	0.297	1	ASDC	TERF2IP
0.00597473	-1.15576	0.05	0.189	1	ASDC	GIMAP2
0.00600329	-3.24599	0.017	0.139	1	ASDC	TRPC4AP
0.00601205	-1.51903	0.033	0.166	1	ASDC	NLRC5
0.00603555	0.313322	0.817	0.854	1	ASDC	H3F3A
0.00605103	-0.440058	0.1	0.268	1	ASDC	ATP1A1
0.00609078	-0.458748	0.283	0.515	1	ASDC	CELF2
0.00612111	5.48917	0.017	0.002	1	ASDC	ABCC2
0.00613477	-1.79658	0.05	0.191	1	ASDC	NCBP2AS2
0.00613604	-1.86539	0.067	0.213	1	ASDC	DYNC1H1
0.00614992	-3.74223	0.017	0.139	1	ASDC	SPON2
0.00619984	2.36618	0.133	0.056	1	ASDC	POLB
0.00622847	-2.06212	0.017	0.142	1	ASDC	SERPINB9
0.00626069	-2.10132	0.033	0.165	1	ASDC	ITGB2-AS1
0.00626496	-1.4884	0.067	0.206	1	ASDC	RAPGEF6
0.00629833	-4.53507	0	0.111	1	ASDC	APOL3
0.00633694	-0.17808	0.333	0.6	1	ASDC	SKP1
0.00636387	2.56024	0.083	0.027	1	ASDC	PURB
0.00637616	-1.33311	0.067	0.215	1	ASDC	AC119396.1
0.00639705	0.721517	0.683	0.738	1	ASDC	ARPC1B
0.00643523	-1.21591	0.033	0.167	1	ASDC	DENND1C
0.00644627	-0.544033	0.15	0.331	1	ASDC	LSM14A
0.00650551	-1.40131	0.05	0.192	1	ASDC	EIF2A
0.00650716	3.36564	0.017	0.002	1	ASDC	AL590666.5
0.00652153	-1.80484	0.15	0.294	1	ASDC	EFHD2
0.00653613	-3.27206	0.017	0.136	1	ASDC	GIMAP6
0.00654579	-1.85868	0.033	0.165	1	ASDC	SRSF8
0.00655756	-0.444788	0.167	0.354	1	ASDC	PAIP2
0.00656319	-1.49923	0.05	0.19	1	ASDC	PAG1
0.0065704	3.76037	0.017	0.002	1	ASDC	AL133342.1
0.00658731	3.07232	0.067	0.019	1	ASDC	FADS1
0.00660805	-0.471572	0.067	0.219	1	ASDC	NFATC3
0.00660888	-1.43206	0.017	0.141	1	ASDC	MLLT3
0.00665263	-4.89902	0	0.11	1	ASDC	SLFN12L
0.00668344	-0.465289	0.35	0.607	1	ASDC	JAK1
0.00670911	-2.99988	0.033	0.159	1	ASDC	RAB8B
0.00676816	-5.06213	0	0.109	1	ASDC	TGFBR3
0.00676858	3.95141	0.017	0.002	1	ASDC	APCDD1
0.0067885	-2.31931	0.05	0.185	1	ASDC	SLCO3A1
0.00679368	1.72906	0.033	0.006	1	ASDC	SLC35F3
0.00682467	-1.11289	0.083	0.235	1	ASDC	SOD2
0.00682984	-0.294295	0.35	0.567	1	ASDC	ATP6V1G1
0.00684573	-4.52848	0	0.109	1	ASDC	HDAC7
0.0068585	3.14217	0.017	0.002	1	ASDC	LINC00960
0.00686799	-1.00119	0.2	0.364	1	ASDC	CSK
0.0068711	4.18045	0.017	0.002	1	ASDC	DNAJC9-AS1
0.00688884	-4.66687	0	0.109	1	ASDC	TMEM71
0.0069334	-0.638227	0.233	0.453	1	ASDC	NDUFB9
0.0069359	-1.46066	0.05	0.19	1	ASDC	MICU2
0.00696255	-1.675	0.067	0.208	1	ASDC	FHIT
0.00697727	-3.53378	0.017	0.135	1	ASDC	MAN2A1
0.00698982	3.24602	0.017	0.002	1	ASDC	DOCK1
0.00699625	-3.41835	0.017	0.134	1	ASDC	SUSD3
0.00702317	2.71813	0.033	0.006	1	ASDC	CTTNBP2NL
0.00704301	1.7295	0.333	0.222	1	ASDC	SSR1
0.00705315	5.58441	0.017	0.002	1	ASDC	ATXN2-AS
0.0070556	-1.61096	0.1	0.246	1	ASDC	TES
0.00712144	3.46573	0.017	0.002	1	ASDC	AP000688.1
0.00713367	-0.38288	0.817	0.926	1	ASDC	RPS25
0.00713962	-1.38262	0.05	0.189	1	ASDC	LYAR
0.0071485	-0.680373	0.25	0.426	1	ASDC	FKBP8
0.00717759	-1.24787	0.067	0.21	1	ASDC	AC243960.1
0.00717776	4.491	0.017	0.002	1	ASDC	TRBV1
0.00718836	-3.61016	0.017	0.133	1	ASDC	WWP2
0.00719399	-2.27054	0.033	0.161	1	ASDC	NORAD
0.00719477	-4.50025	0	0.108	1	ASDC	PRKD2
0.00720045	-1.69982	0.067	0.208	1	ASDC	HMGN4
0.0072047	-2.77845	0.017	0.137	1	ASDC	SLC9A9
0.00722408	-1.01075	0.167	0.322	1	ASDC	MAT2B
0.00726191	-5.02415	0	0.108	1	ASDC	MCTP2
0.00726573	-3.40755	0.017	0.133	1	ASDC	RRP1B
0.00734459	-0.911836	0.133	0.289	1	ASDC	IMP3
0.00736794	-1.06051	0.083	0.237	1	ASDC	IRF9
0.00738474	0.319222	0.9	0.918	1	ASDC	PFN1
0.00742089	-1.4874	0.167	0.322	1	ASDC	ITGB1
0.00742148	-0.434469	0.233	0.434	1	ASDC	CNN2
0.00745404	-0.34632	0.233	0.434	1	ASDC	ANXA11
0.00745494	1.22491	0.517	0.476	1	ASDC	HSP90B1
0.00747057	-1.64949	0.033	0.166	1	ASDC	OXLD1
0.0074937	-2.07684	0.033	0.16	1	ASDC	CD5
0.00754309	-0.504309	0.15	0.3	1	ASDC	BANF1
0.00761508	4.95765	0.017	0.002	1	ASDC	PMFBP1
0.00763719	-3.52564	0.017	0.132	1	ASDC	PPP2R2A
0.00764763	-2.69735	0.017	0.136	1	ASDC	NMI
0.00765817	-4.66166	0	0.106	1	ASDC	LINC01550
0.00766093	-0.586106	0.15	0.323	1	ASDC	BAX
0.00768001	-2.40797	0.033	0.16	1	ASDC	EFR3A
0.00775812	1.73204	0.2	0.103	1	ASDC	RRBP1
0.00776733	-3.3637	0.017	0.132	1	ASDC	CTDSP2
0.00778677	-2.22914	0.033	0.159	1	ASDC	ACTN1
0.00779608	-4.51378	0	0.106	1	ASDC	WAC-AS1
0.00784713	-3.08435	0.033	0.155	1	ASDC	PARP14
0.00786656	1.87038	0.15	0.067	1	ASDC	SEL1L3
0.00786912	2.85362	0.083	0.028	1	ASDC	SLC7A5
0.00790468	-2.87553	0.033	0.157	1	ASDC	CDKAL1
0.0079585	-4.39841	0	0.105	1	ASDC	NCBP2
0.00796448	-3.1847	0.017	0.133	1	ASDC	CDK17
0.00796678	-0.897394	0.033	0.166	1	ASDC	TNFAIP3
0.00798724	2.22365	0.067	0.019	1	ASDC	KLC4
0.00807837	-1.27848	0.067	0.212	1	ASDC	FRYL
0.00811254	3.14578	0.017	0.002	1	ASDC	CTF1
0.00814195	1.39372	0.067	0.019	1	ASDC	MS4A4A
0.00816191	-4.93024	0	0.105	1	ASDC	MYBL1
0.00817359	-1.28168	0.067	0.216	1	ASDC	OGFR
0.00817645	-0.759301	0.05	0.193	1	ASDC	CHMP3
0.00820815	-1.85285	0.033	0.158	1	ASDC	PHF21A
0.00820993	3.82401	0.033	0.006	1	ASDC	AC110611.2
0.00822083	3.37951	0.067	0.02	1	ASDC	FTCDNL1
0.00825691	-4.54738	0	0.105	1	ASDC	XPO4
0.00825838	-0.882964	0.067	0.213	1	ASDC	CRBN
0.00833351	-0.399665	0.433	0.665	1	ASDC	SNRPD2
0.00834189	4.01853	0.017	0.002	1	ASDC	PLPP3
0.00837973	-2.43265	0.017	0.134	1	ASDC	FKBP11
0.00838203	-1.72669	0.033	0.16	1	ASDC	BLOC1S4
0.00838357	-0.95325	0.1	0.252	1	ASDC	ATRAID
0.00841504	-4.57584	0	0.104	1	ASDC	NLRC3
0.00842088	-4.40864	0	0.104	1	ASDC	TP53TG1
0.00847484	-0.987393	0.1	0.247	1	ASDC	TMC6
0.00851881	-4.53975	0	0.104	1	ASDC	SHISAL2A
0.00860105	1.30249	0.1	0.037	1	ASDC	ICAM1
0.00863301	-1.05827	0.067	0.211	1	ASDC	VPS13B
0.0086455	-2.50782	0.05	0.173	1	ASDC	SS18L2
0.008646	-2.24795	0.033	0.158	1	ASDC	PPP2R5E
0.00865614	0.609609	0.6	0.547	1	ASDC	GSTP1
0.0087014	2.87715	0.067	0.02	1	ASDC	CUEDC1
0.00876042	-4.40285	0	0.103	1	ASDC	TMEM204
0.00877523	-1.08094	0.15	0.319	1	ASDC	GHITM
0.00881169	4.00687	0.05	0.013	1	ASDC	DBN1
0.00882978	-2.95236	0.017	0.132	1	ASDC	DUSP2
0.00885597	-3.13662	0.017	0.13	1	ASDC	SLU7
0.00887787	2.79624	0.1	0.038	1	ASDC	ZFYVE26
0.00887859	-4.76224	0	0.103	1	ASDC	TNKS
0.00888885	-5.02626	0	0.103	1	ASDC	TBX21
0.00888936	2.3384	0.033	0.006	1	ASDC	MROH8
0.00889857	-2.30452	0.033	0.156	1	ASDC	MRFAP1L1
0.00894695	1.69661	0.083	0.028	1	ASDC	VPS13B-DT
0.00897587	-0.886063	0.067	0.214	1	ASDC	IRF2
0.00906784	2.99532	0.067	0.02	1	ASDC	TIMM8A
0.00907196	-0.36197	0.217	0.404	1	ASDC	XRCC6
0.00911651	-0.96103	0.033	0.158	1	ASDC	GRAP2
0.00912817	1.46454	0.217	0.116	1	ASDC	NUDT1
0.00923415	-0.292426	0.933	0.961	1	ASDC	RPL37
0.00924823	-0.366984	0.083	0.235	1	ASDC	BNIP3L
0.0092514	-2.64445	0.05	0.173	1	ASDC	CEMIP2
0.00925788	-0.861796	0.017	0.134	1	ASDC	UBQLN1
0.0092657	-0.47272	0.25	0.438	1	ASDC	CSTB
0.00928258	-1.52889	0.017	0.133	1	ASDC	GPRIN3
0.00932155	-1.02987	0.1	0.255	1	ASDC	GCC2
0.00933681	1.64767	0.3	0.193	1	ASDC	SEC13
0.00934264	-0.892308	0.217	0.39	1	ASDC	SERPINB1
0.00935107	1.68093	0.167	0.08	1	ASDC	SLC12A9
0.00943042	-1.50452	0.067	0.196	1	ASDC	RASSF3
0.00943044	1.54782	0.05	0.013	1	ASDC	RAPH1
0.00943186	-0.598591	0.267	0.465	1	ASDC	SMCHD1
0.00944731	-4.29853	0	0.101	1	ASDC	BET1L
0.00945166	-4.79525	0	0.101	1	ASDC	PAM
0.00946553	3.16289	0.017	0.002	1	ASDC	AP001453.1
0.00950982	1.24893	0.25	0.141	1	ASDC	MFSD1
0.00954655	-1.39703	0.017	0.133	1	ASDC	PITHD1
0.00955375	5.36767	0.017	0.002	1	ASDC	HIST1H3E
0.00958254	2.86233	0.033	0.006	1	ASDC	NRG2
0.00958578	-3.29466	0.017	0.128	1	ASDC	SVIL
0.00959031	2.50171	0.017	0.002	1	ASDC	MTMR7
0.00959439	-4.63973	0	0.101	1	ASDC	SESN1
0.00960705	1.70195	0.25	0.146	1	ASDC	LAP3
0.00961112	-1.55515	0.1	0.242	1	ASDC	HDAC1
0.00961964	-2.81566	0.033	0.15	1	ASDC	UBA3
0.00962779	-0.463768	0.117	0.272	1	ASDC	CHD2
0.00963651	-4.44488	0	0.101	1	ASDC	PTPN7
0.0096908	-0.300572	0.917	0.957	1	ASDC	RPL35A
0.00969518	-3.18949	0.017	0.127	1	ASDC	SFXN1
0.00970182	4.63422	0.017	0.002	1	ASDC	UBXN7-AS1
0.0097048	3.10268	0.1	0.039	1	ASDC	KAT2A
0.00975578	-0.712813	0.033	0.162	1	ASDC	CHD4
0.00976596	-0.451128	0.133	0.292	1	ASDC	OXA1L
0.00984347	2.4224	0.1	0.037	1	ASDC	ACOT2
0.00985321	4.0885	0.017	0.002	1	ASDC	LMO7-AS1
0.00990125	-2.40919	0.033	0.156	1	ASDC	FOXO1
0.00990677	1.39847	0.15	0.067	1	ASDC	MGST1
0.00994129	1.70326	0.033	0.007	1	ASDC	MED12L
0.00995776	-0.911992	0.033	0.156	1	ASDC	LY9
0.00996806	-1.31826	0.05	0.18	1	ASDC	RAB24
0.0099842	1.31972	0.317	0.206	1	ASDC	PGD
0.0099846	-4.73932	0	0.1	1	ASDC	NCK2
0.00998961	-0.685045	0.267	0.453	1	ASDC	FLNA
0	4.54795	0.925	0.056	0	B intermediate	MS4A1
0	4.54695	0.9	0.058	0	B intermediate	BANK1
0	4.21012	0.901	0.066	0	B intermediate	CD79A
0	4.27369	0.81	0.075	0	B intermediate	RALGPS2
0	3.51786	0.787	0.091	0	B intermediate	AFF3
0	3.12245	0.825	0.134	0	B intermediate	HLA-DQA1
0	3.59057	0.774	0.1	0	B intermediate	CD79B
0	3.94401	0.69	0.048	0	B intermediate	IGHM
0	2.65621	0.965	0.334	0	B intermediate	HLA-DRA
0	-3.94162	0.053	0.683	0	B intermediate	FYB1
0	2.39502	0.828	0.236	0	B intermediate	HLA-DQB1
0	4.27622	0.621	0.036	0	B intermediate	BLK
0	2.59644	0.868	0.292	0	B intermediate	HLA-DRB5
0	4.76859	0.592	0.023	0	B intermediate	FCRLA
0	3.16437	0.677	0.111	0	B intermediate	ARHGAP24
0	-5.05831	0.026	0.592	0	B intermediate	GIMAP7
0	3.49336	0.597	0.04	0	B intermediate	LINC00926
0	3.89657	0.59	0.036	0	B intermediate	NIBAN3
0	1.82869	0.923	0.377	0	B intermediate	HLA-DRB1
0	-3.68298	0.103	0.646	0	B intermediate	HCST
0	2.32804	0.928	0.392	0	B intermediate	HLA-DPA1
0	2.35542	0.916	0.39	0	B intermediate	HLA-DPB1
0	3.3719	0.595	0.072	0	B intermediate	SWAP70
0	-4.97912	0.027	0.549	0	B intermediate	ANXA1
0	4.43587	0.543	0.024	0	B intermediate	SPIB
0	-4.92321	0.02	0.519	0	B intermediate	GIMAP4
0	-5.14181	0.029	0.527	0	B intermediate	CD3E
0	3.92244	0.524	0.035	0	B intermediate	IGKC
0	-4.74291	0.055	0.542	0	B intermediate	IL32
0	4.51758	0.502	0.024	0	B intermediate	CD19
0	2.07163	0.678	0.201	0	B intermediate	SYK
0	3.96497	0.517	0.042	0	B intermediate	P2RX5
0	1.94565	0.671	0.204	0	B intermediate	HLA-DMA
0	6.22968	0.474	0.007	0	B intermediate	IGHG2
0	4.05523	0.478	0.026	0	B intermediate	PAX5
0	2.12146	0.613	0.163	0	B intermediate	MARCH1
0	3.41159	0.499	0.051	0	B intermediate	GNG7
0	4.55921	0.475	0.027	0	B intermediate	OSBPL10
0	3.83233	0.477	0.036	0	B intermediate	ADAM28
0	-3.21127	0.076	0.509	0	B intermediate	SAMHD1
0	3.37901	0.462	0.034	0	B intermediate	FCRL1
0	2.6126	0.524	0.096	0	B intermediate	CXXC5
0	1.85739	0.608	0.182	0	B intermediate	MEF2C
0	-2.94973	0.187	0.611	0	B intermediate	SRGN
0	3.20443	0.491	0.069	0	B intermediate	HLA-DQA2
0	-5.80898	0.015	0.434	0	B intermediate	CD7
0	4.22027	0.439	0.022	0	B intermediate	BLNK
0	3.47398	0.465	0.051	0	B intermediate	WDFY4
0	4.47478	0.43	0.018	0	B intermediate	POU2AF1
0	-4.85496	0.016	0.427	0	B intermediate	CD3D
0	6.61271	0.412	0.004	0	B intermediate	TNFRSF13B
0	6.20067	0.409	0.007	0	B intermediate	LINC01857
0	1.83325	0.641	0.241	0	B intermediate	SNX2
0	-4.29672	0.032	0.429	0	B intermediate	LCK
0	-4.52506	0.023	0.42	0	B intermediate	SELPLG
0	3.24546	0.442	0.046	0	B intermediate	PDLIM1
0	-4.37649	0.048	0.443	0	B intermediate	IL7R
0	0.95122	0.701	0.307	0	B intermediate	NCF1
0	4.51579	0.411	0.018	0	B intermediate	EBF1
0	-5.15396	0.013	0.404	0	B intermediate	GIMAP5
0	2.62742	0.497	0.107	0	B intermediate	CD82
0	3.45542	0.429	0.043	0	B intermediate	TCF4
0	-3.68814	0.043	0.426	0	B intermediate	CD247
0	-2.26131	0.334	0.716	0	B intermediate	S100A10
0	3.82918	0.41	0.032	0	B intermediate	FCGR2B
0	2.9492	0.451	0.073	0	B intermediate	TSPAN3
0	-3.07736	0.413	0.79	0	B intermediate	S100A4
0	0.929164	0.658	0.286	0	B intermediate	LYN
0	2.33045	0.509	0.138	0	B intermediate	SP140
0	1.48154	0.719	0.351	0	B intermediate	FCMR
0	4.40276	0.384	0.018	0	B intermediate	PLEKHG1
0	3.84284	0.391	0.025	0	B intermediate	CD22
0	4.84884	0.375	0.01	0	B intermediate	IGHA1
0	1.99535	0.481	0.117	0	B intermediate	HVCN1
0	2.54773	0.456	0.094	0	B intermediate	CYB561A3
0	3.19019	0.409	0.048	0	B intermediate	BCL11A
0	3.95844	0.393	0.034	0	B intermediate	CDK14
0	-5.02983	0.054	0.412	0	B intermediate	TYROBP
0	4.63992	0.373	0.015	0	B intermediate	CD24
0	-3.15511	0.303	0.66	0	B intermediate	IFITM1
0	3.29144	0.4	0.046	0	B intermediate	CCDC50
0	-2.12828	0.278	0.628	0	B intermediate	ITGB2
0	5.53509	0.356	0.008	0	B intermediate	FCRL2
0	1.62784	0.657	0.31	0	B intermediate	EZR
0	1.7964	0.481	0.134	0	B intermediate	HLA-DMB
0	3.63964	0.374	0.029	0	B intermediate	RUBCNL
0	1.76099	0.521	0.177	0	B intermediate	IKZF3
0	1.38358	0.577	0.235	0	B intermediate	POU2F2
0	-2.70655	0.287	0.618	0	B intermediate	S100A11
0	2.4405	0.422	0.092	0	B intermediate	TPD52
0	2.46248	0.405	0.076	0	B intermediate	IRF8
0	3.40792	0.356	0.03	0	B intermediate	PLD4
0	1.68603	0.511	0.186	0	B intermediate	FCHSD2
0	1.46682	0.644	0.32	0	B intermediate	SYNGR2
0	3.8231	0.344	0.022	0	B intermediate	TNFRSF13C
0	4.26934	0.339	0.018	0	B intermediate	COBLL1
0	3.35248	0.352	0.037	0	B intermediate	NAPSA
0	2.0771	0.42	0.107	0	B intermediate	PLCG2
0	2.7998	0.364	0.055	0	B intermediate	ITM2C
0	1.85821	0.47	0.161	0	B intermediate	SYPL1
0	3.44477	0.332	0.025	0	B intermediate	HLA-DOB
0	4.69189	0.32	0.014	0	B intermediate	CD1C
0	3.62387	0.336	0.031	0	B intermediate	CD72
0	1.66241	0.489	0.192	0	B intermediate	NCOA3
0	2.44105	0.38	0.084	0	B intermediate	SIPA1L3
0	1.35873	0.689	0.393	0	B intermediate	SNX3
0	2.2831	0.383	0.088	0	B intermediate	ORAI2
0	2.62563	0.361	0.067	0	B intermediate	IFT57
0	2.87067	0.334	0.043	0	B intermediate	CD40
0	1.69937	0.422	0.131	0	B intermediate	ALOX5
0	2.90001	0.319	0.029	0	B intermediate	IGHD
0	1.73726	0.45	0.162	0	B intermediate	SMARCB1
0	4.40243	0.31	0.022	0	B intermediate	PPP1R14A
0	3.63292	0.303	0.019	0	B intermediate	LINC02397
0	1.67977	0.438	0.156	0	B intermediate	MTSS1
0	2.49532	0.357	0.076	0	B intermediate	SMC6
0	2.62745	0.344	0.063	0	B intermediate	SEL1L3
0	3.05244	0.324	0.044	0	B intermediate	FCRL3
0	1.75028	0.418	0.138	0	B intermediate	STX7
0	6.84602	0.283	0.003	0	B intermediate	COPDA1
0	1.88138	0.412	0.133	0	B intermediate	ODC1
0	1.43357	0.422	0.145	0	B intermediate	LY86
0	4.55866	0.286	0.009	0	B intermediate	BACE2
0	4.52574	0.29	0.014	0	B intermediate	CLECL1
0	3.43443	0.311	0.037	0	B intermediate	SETBP1
0	6.89261	0.274	0.003	0	B intermediate	SOX5
0	3.22148	0.297	0.026	0	B intermediate	VPREB3
0	2.1237	0.374	0.104	0	B intermediate	SMIM14
0	2.69767	0.322	0.053	0	B intermediate	STRBP
0	3.6058	0.292	0.024	0	B intermediate	KHDRBS2
0	3.31224	0.296	0.032	0	B intermediate	SEMA4B
0	3.44858	0.283	0.021	0	B intermediate	JCHAIN
0	2.37523	0.327	0.07	0	B intermediate	ACP5
0	1.6905	0.394	0.139	0	B intermediate	BIRC3
0	2.14496	0.333	0.083	0	B intermediate	GGA2
0	4.94878	0.257	0.009	0	B intermediate	FCRL5
0	4.45999	0.26	0.012	0	B intermediate	ANGPTL1
0	4.04346	0.261	0.016	0	B intermediate	AIM2
0	5.65279	0.248	0.004	0	B intermediate	IGHG1
0	4.65375	0.248	0.007	0	B intermediate	RHEX
0	1.94947	0.329	0.09	0	B intermediate	PARP15
0	3.6629	0.258	0.019	0	B intermediate	PKIG
0	3.89038	0.254	0.015	0	B intermediate	FAM30A
0	4.57443	0.248	0.01	0	B intermediate	TLR10
0	1.70732	0.353	0.115	0	B intermediate	HDAC9
0	2.80415	0.28	0.043	0	B intermediate	PALM2-AKAP2
0	1.75631	0.356	0.119	0	B intermediate	KIAA0040
0	2.29869	0.321	0.085	0	B intermediate	JUN
0	4.08573	0.256	0.021	0	B intermediate	CCSER1
0	4.5453	0.245	0.01	0	B intermediate	DENND5B
0	-1.42829	0.6	0.832	0	B intermediate	ITM2B
0	2.2087	0.297	0.065	0	B intermediate	CIITA
0	1.85921	0.325	0.099	0	B intermediate	CHPT1
0	2.43003	0.285	0.059	0	B intermediate	TBC1D9
0	2.34688	0.289	0.064	0	B intermediate	CD83
0	2.38087	0.277	0.054	0	B intermediate	QRSL1
0	3.62759	0.237	0.016	0	B intermediate	CNR2
0	2.39357	0.276	0.056	0	B intermediate	EAF2
0	2.08827	0.307	0.087	0	B intermediate	DAPP1
0	2.21865	0.276	0.057	0	B intermediate	ADAM19
0	2.66149	0.997	0.778	0	B intermediate	CD74
0	5.51256	0.219	0.005	0	B intermediate	IGHG3
0	3.81875	0.227	0.014	0	B intermediate	PNOC
0	4.00964	0.222	0.014	0	B intermediate	IGLC2
0	1.90942	0.272	0.068	0	B intermediate	FGD2
0	2.03979	0.266	0.062	0	B intermediate	TFEB
0	2.05691	0.254	0.052	0	B intermediate	GAPT
0	1.92435	0.266	0.064	0	B intermediate	BTK
0	5.23875	0.209	0.007	0	B intermediate	AL592429.2
0	3.09089	0.219	0.022	0	B intermediate	COL19A1
0	4.25163	0.207	0.011	0	B intermediate	IGLC3
0	-2.45509	0.624	0.819	0	B intermediate	S100A6
0	1.93591	0.262	0.068	0	B intermediate	TMEM156
0	2.96921	0.225	0.032	0	B intermediate	PIP5K1B
0	2.20501	0.251	0.063	0	B intermediate	FAM3C
0	2.41951	0.237	0.05	0	B intermediate	C16orf74
0	1.78294	0.942	0.755	0	B intermediate	CD37
0	3.0012	0.202	0.022	0	B intermediate	CXCR5
0	3.02474	0.2	0.022	0	B intermediate	HLA-DOA
0	2.92376	0.205	0.03	0	B intermediate	USP6NL
0	1.95247	0.207	0.034	0	B intermediate	FCER2
0	3.06225	0.187	0.015	0	B intermediate	MZB1
0	2.73894	0.195	0.025	0	B intermediate	STAP1
0	5.82739	0.173	0.003	0	B intermediate	GPM6A
0	2.5224	0.203	0.036	0	B intermediate	ZDHHC21
0	3.14164	0.187	0.021	0	B intermediate	CD180
0	3.16911	0.186	0.022	0	B intermediate	KMO
0	3.06841	0.184	0.022	0	B intermediate	SLC9A7
0	2.56396	0.189	0.03	0	B intermediate	RAB30
0	2.47874	0.193	0.034	0	B intermediate	ZNF296
0	2.34327	0.197	0.04	0	B intermediate	AL050309.1
0	4.12818	0.165	0.009	0	B intermediate	CPNE5
0	4.02235	0.165	0.009	0	B intermediate	CLEC17A
0	2.36851	0.186	0.033	0	B intermediate	CDCA7L
0	2.20392	0.194	0.043	0	B intermediate	AC007384.1
0	3.92933	0.162	0.011	0	B intermediate	IL7
0	2.82802	0.172	0.022	0	B intermediate	BCL7A
0	2.1624	0.185	0.036	0	B intermediate	BTLA
0	5.50821	0.145	0.003	0	B intermediate	AL355076.2
0	2.9335	0.156	0.017	0	B intermediate	SNX22
0	4.16228	0.14	0.004	0	B intermediate	LILRA4
0	3.49261	0.161	0.025	0	B intermediate	MACROD2
0	3.91503	0.149	0.013	0	B intermediate	MEF2C-AS1
0	3.72734	0.149	0.014	0	B intermediate	PCDH9
0	3.12985	0.148	0.013	0	B intermediate	IGHV5-78
0	3.70709	0.145	0.014	0	B intermediate	STEAP1B
0	4.77352	0.135	0.005	0	B intermediate	TSBP1-AS1
0	3.10724	0.147	0.017	0	B intermediate	PTPRK
0	6.03647	0.132	0.003	0	B intermediate	KLK1
0	3.97677	0.137	0.008	0	B intermediate	KLHL14
0	0.775693	0.908	0.78	0	B intermediate	CD52
0	3.0326	0.147	0.021	0	B intermediate	CPED1
0	3.37306	0.14	0.015	0	B intermediate	AC120193.1
0	4.13542	0.131	0.007	0	B intermediate	IGHV3-23
0	3.77826	0.127	0.005	0	B intermediate	IGHV3-30
0	3.28651	0.128	0.01	0	B intermediate	RASGRP3
0	3.47545	0.127	0.01	0	B intermediate	E2F5
0	4.51309	0.119	0.005	0	B intermediate	ZNF860
0	2.55771	0.135	0.023	0	B intermediate	MICAL3
0	5.71181	0.112	0.002	0	B intermediate	NXPH4
0	3.67447	0.117	0.009	0	B intermediate	CNFN
0	3.12338	0.125	0.017	0	B intermediate	TUBB6
0	6.83909	0.107	0.001	0	B intermediate	GALNTL6
0	3.43396	0.114	0.009	0	B intermediate	LINC01781
0	5.20767	0.115	0.011	0	B intermediate	IGKV1-5
0	4.21318	0.109	0.005	0	B intermediate	TLR9
0	5.27836	0.105	0.003	0	B intermediate	ZBTB32
0	3.14208	0.116	0.015	0	B intermediate	LARGE1
0	3.57259	0.108	0.009	0	B intermediate	AP1S3
0	3.98135	0.108	0.011	0	B intermediate	IGKV3-20
0	3.17292	0.106	0.011	0	B intermediate	WDR34
0	4.43068	0.102	0.008	0	B intermediate	IGKV4-1
0	2.81756	0.107	0.015	0	B intermediate	LARGE2
0	5.49849	0.093	0.002	0	B intermediate	COL4A3
0	3.40717	0.098	0.009	0	B intermediate	AC007569.1
0	3.70393	0.095	0.007	0	B intermediate	LCN10
0	2.7449	0.102	0.014	0	B intermediate	TRAF4
0	4.74557	0.091	0.003	0	B intermediate	AP002075.1
0	3.15796	0.096	0.011	0	B intermediate	GEN1
0	8.20219	0.085	0	0	B intermediate	AC007368.1
0	3.37151	0.092	0.008	0	B intermediate	PAWR
0	3.18392	0.092	0.009	0	B intermediate	CD70
0	4.51775	0.085	0.003	0	B intermediate	SSPN
0	3.31205	0.09	0.008	0	B intermediate	JAM3
0	5.05537	0.084	0.003	0	B intermediate	JADE3
0	5.68512	0.083	0.002	0	B intermediate	AL079338.1
0	4.3064	0.082	0.004	0	B intermediate	LINC00494
0	3.57027	0.085	0.008	0	B intermediate	AP001636.3
0	3.84935	0.083	0.006	0	B intermediate	IFNLR1
0	3.40407	0.084	0.007	0	B intermediate	ZBTB20-AS5
0	6.61017	0.078	0.001	0	B intermediate	WNT16
0	4.88274	0.078	0.002	0	B intermediate	COL9A3
0	3.13212	0.084	0.009	0	B intermediate	AC104971.3
0	3.37504	0.083	0.009	0	B intermediate	ARL4D
0	3.4617	0.081	0.007	0	B intermediate	ABCB4
0	4.58395	0.076	0.003	0	B intermediate	COL4A4
0	4.21612	0.071	0.004	0	B intermediate	AC021678.2
0	4.05602	0.068	0.004	0	B intermediate	IGHV4-59
0	2.69997	0.071	0.007	0	B intermediate	DERL3
0	4.33289	0.066	0.003	0	B intermediate	AC012236.1
0	6.05705	0.063	0.001	0	B intermediate	SIGLEC6
0	3.92267	0.063	0.003	0	B intermediate	RGS7
0	5.0304	0.062	0.002	0	B intermediate	SYT1
0	4.5865	0.06	0.003	0	B intermediate	IGHV3-7
0	5.87697	0.057	0.001	0	B intermediate	UTS2B
0	3.51062	0.059	0.004	0	B intermediate	IGHV5-51
0	4.54472	0.056	0.002	0	B intermediate	FBLN2
0	4.64333	0.056	0.003	0	B intermediate	AC083837.1
0	5.38904	0.054	0.001	0	B intermediate	EBI3
0	3.64426	0.055	0.003	0	B intermediate	MYBL2
0	6.06631	0.052	0.001	0	B intermediate	BHLHE41
0	3.47685	0.054	0.004	0	B intermediate	CELSR1
0	3.58764	0.052	0.003	0	B intermediate	SEMA7A
0	5.14107	0.047	0.001	0	B intermediate	DNAJC5B
0	4.96731	0.046	0.001	0	B intermediate	LINC02202
0	4.26767	0.047	0.003	0	B intermediate	EML6
0	4.69768	0.041	0.001	0	B intermediate	PLPP3
0	4.14616	0.04	0.002	0	B intermediate	UGT8
0	4.58537	0.037	0.001	0	B intermediate	LINC01013
0	4.24498	0.037	0.001	0	B intermediate	IGHG4
0	6.05446	0.034	0	0	B intermediate	LINC01754
0	4.36736	0.036	0.002	0	B intermediate	PTCHD1-AS
0	7.83337	0.033	0	0	B intermediate	LINC02137
0	5.74123	0.034	0.001	0	B intermediate	ANK2
0	4.52604	0.033	0.001	0	B intermediate	BEND4
0	4.50872	0.033	0.001	0	B intermediate	TEAD2
0	4.72864	0.033	0.001	0	B intermediate	AC104699.1
0	4.45233	0.033	0.001	0	B intermediate	IGKV2-29
0	5.63104	0.029	0.001	0	B intermediate	PRKD1
0	8.54722	0.028	0	0	B intermediate	LINC02227
0	4.96156	0.028	0.001	0	B intermediate	ROR1
0	5.84877	0.024	0	0	B intermediate	LRRC4C
0	5.09786	0.024	0.001	0	B intermediate	AC025569.1
0	5.76028	0.023	0	0	B intermediate	LINC02324
0	5.51641	0.024	0.001	0	B intermediate	IGLV8-61
0	6.33077	0.022	0	0	B intermediate	SOX7
0	5.63186	0.023	0.001	0	B intermediate	NTNG1
0	10.531	0.022	0	0	B intermediate	SMOC2
0	4.27549	0.02	0	0	B intermediate	ALPL
0	5.94046	0.018	0	0	B intermediate	LINC02471
0	8.18165	0.018	0	0	B intermediate	DUSP15
0	-0.840544	0.951	0.968	0	B intermediate	TMSB10
0	7.64309	0.017	0	0	B intermediate	ADAMTS19
0	-0.658417	0.959	0.975	0	B intermediate	TMSB4X
0	8.26683	0.015	0	0	B intermediate	SUSD5
4.97467672425636e-308	2.34005	0.195	0.044	1.26113029636623e-303	B intermediate	TTN
3.63092718602643e-306	1.84169	0.205	0.047	9.2047635092956e-302	B intermediate	BASP1
2.8749214686187e-304	4.05821	0.049	0.003	7.28821341509528e-300	B intermediate	AC008691.1
6.67997914872756e-303	3.37964	0.07	0.007	1.69344151399392e-298	B intermediate	CR2
6.84553185376055e-301	2.05827	0.177	0.037	1.73541078024684e-296	B intermediate	TLE1
1.06203289283415e-300	5.36823	0.028	0.001	2.69235958662384e-296	B intermediate	IGKV1-16
9.2745360071832e-298	1.65439	0.348	0.119	2.35118762318101e-293	B intermediate	ARHGAP17
2.50664174882729e-297	1.95868	0.228	0.058	6.35458749745206e-293	B intermediate	RRAS2
3.10242832300833e-297	1.5051	0.327	0.105	7.86496604165842e-293	B intermediate	NCF4
7.42748884753564e-292	3.27828	0.056	0.005	1.88294269773876e-287	B intermediate	LINC00996
5.85428177520705e-291	1.48882	0.504	0.229	1.48411897283274e-286	B intermediate	PARP1
1.34739089916874e-290	3.37362	0.055	0.004	3.41577066848266e-286	B intermediate	GATM
3.52746164476608e-290	3.29936	0.062	0.006	8.9424680156465e-286	B intermediate	INKA1
1.14063412569282e-289	3.9634	0.039	0.002	2.89162157204386e-285	B intermediate	AC022239.1
1.15473337393263e-288	1.57961	0.362	0.128	2.92736457625662e-284	B intermediate	PPM1K
1.59743645950589e-288	3.72083	0.044	0.003	4.04966116849337e-284	B intermediate	AC246787.2
3.55557874122395e-288	-0.817316	0.964	0.975	9.01374766687683e-284	B intermediate	ACTB
4.45201799889236e-287	3.69884	0.048	0.003	1.1286310828992e-282	B intermediate	IGLV1-47
1.8226500590239e-286	4.28476	0.039	0.002	4.62060016463148e-282	B intermediate	AC133065.1
2.05719277269402e-286	1.60753	0.385	0.143	5.21518939805662e-282	B intermediate	MBD4
1.18354509826465e-285	1.56161	0.511	0.229	3.00040517861071e-281	B intermediate	ZCCHC7
7.51987800088932e-285	-2.51234	0.236	0.55	1.90636427200545e-280	B intermediate	TSPO
2.45576171863541e-284	-4.4244	0.016	0.357	6.22560153291263e-280	B intermediate	CD2
3.99397615526989e-283	3.54193	0.058	0.005	1.01251289512247e-278	B intermediate	DTX1
1.61224309559096e-282	1.51366	0.473	0.204	4.08719747163263e-278	B intermediate	ST6GAL1
2.70664297093944e-282	3.82258	0.04	0.002	6.86161059562857e-278	B intermediate	LCN8
3.13568713966424e-281	-4.75902	0.011	0.348	7.94928046776281e-277	B intermediate	GIMAP1
4.48815530504909e-281	1.6668	0.501	0.223	1.13779225138299e-276	B intermediate	BACH2
1.09859251674325e-280	3.78284	0.041	0.003	2.78504188919582e-276	B intermediate	NETO1
2.88843904436172e-280	5.18311	0.014	0	7.3224818213614e-276	B intermediate	SEMA3D
6.59075630849531e-280	1.94029	0.221	0.057	1.67082263176665e-275	B intermediate	BCAS4
1.69946275459773e-278	6.27268	0.012	0	4.3083080291807e-274	B intermediate	LINC01605
1.71240643691293e-278	2.78663	0.169	0.038	4.34112155821798e-274	B intermediate	MPP6
2.54825309091501e-278	1.52496	0.486	0.222	6.46007641077865e-274	B intermediate	VOPP1
3.38061142130586e-277	5.99444	0.013	0	8.5701880141525e-273	B intermediate	AC006364.1
1.36611439946905e-275	3.32003	0.055	0.005	3.463236614094e-271	B intermediate	IGHV3-21
2.72392085397963e-275	-2.44486	0.153	0.484	6.90541175692376e-271	B intermediate	PLAAT4
6.89630649191253e-275	-4.54531	0.015	0.347	1.74828265876474e-270	B intermediate	LINC00861
1.91691495350443e-273	-3.23563	0.04	0.38	4.85957109862909e-269	B intermediate	LCP2
4.53205201777468e-273	2.36192	0.232	0.064	1.14892050702606e-268	B intermediate	AUTS2
1.09594542336845e-270	4.95852	0.023	0.001	2.77833124278136e-266	B intermediate	GUCY2C
3.62992585369971e-270	3.61096	0.035	0.002	9.20222503171413e-266	B intermediate	ZNF608
1.59469339110176e-268	2.42646	0.128	0.023	4.04270721578207e-264	B intermediate	GPR18
4.4011772793553e-267	2.86659	0.076	0.009	1.11574245208936e-262	B intermediate	EHD3
1.16221842353892e-264	-4.4246	0.014	0.338	2.94633992551353e-260	B intermediate	CD3G
4.7236818967734e-263	-4.14513	0.046	0.367	1.19750059765102e-258	B intermediate	FCER1G
2.96251304517705e-262	3.51518	0.043	0.003	7.51026682082835e-258	B intermediate	PKHD1L1
2.37265219877362e-261	-1.0178	0.817	0.883	6.014910589111e-257	B intermediate	SH3BGRL3
3.0204842681257e-259	5.30226	0.015	0	7.65722966812547e-255	B intermediate	RASGRF1
9.21875934759595e-259	3.7974	0.039	0.002	2.33704768220905e-254	B intermediate	FAM111B
2.14297251769696e-257	3.44749	0.048	0.004	5.43264962961357e-253	B intermediate	ANKRD33B
5.86967540744865e-257	1.20509	0.59	0.311	1.48802141254231e-252	B intermediate	SP110
2.23421959453096e-253	1.67861	0.23	0.065	5.66397009409543e-249	B intermediate	HHEX
2.3328039656884e-248	0.685419	0.933	0.808	5.91389133341668e-244	B intermediate	MT-ND4L
9.05175050637031e-248	1.27479	0.476	0.213	2.29470927086994e-243	B intermediate	CAMK1D
1.4930645265801e-247	-4.68994	0.014	0.321	3.78506788133322e-243	B intermediate	LAT
1.61485470843965e-247	3.83474	0.035	0.002	4.09381817136536e-243	B intermediate	LINC02413
6.31213135997569e-247	4.57951	0.033	0.002	1.60018842106744e-242	B intermediate	IGHV3-74
7.9082093566012e-247	1.6337	0.276	0.089	2.00481015399197e-242	B intermediate	PXK
8.00790311585268e-247	-2.60633	0.108	0.423	2.03008351889981e-242	B intermediate	VSIR
4.05968553203909e-244	6.11406	0.011	0	1.02917087922723e-239	B intermediate	HCG22
1.23276298347114e-243	2.12525	0.154	0.034	3.12517743939768e-239	B intermediate	HIP1R
1.79723780192122e-243	-2.5771	0.111	0.422	4.55617755165048e-239	B intermediate	ZYX
5.17514313212996e-241	1.06159	0.673	0.412	1.31195053542627e-236	B intermediate	PTPN6
6.14214014307124e-241	1.65378	0.258	0.081	1.55709394766999e-236	B intermediate	SCIMP
1.27714333980917e-240	4.29756	0.041	0.003	3.23768608075022e-236	B intermediate	IGLV1-51
2.31911532041564e-238	1.70708	0.234	0.069	5.8791892487857e-234	B intermediate	RIC3
1.71731551172983e-237	4.70978	0.022	0.001	4.3535665537863e-233	B intermediate	SYNPO
2.1317282717211e-237	2.21485	0.108	0.019	5.40414434164016e-233	B intermediate	TSPAN13
5.47124164882656e-236	-3.26935	0.036	0.341	1.38701447039402e-231	B intermediate	AOAH
1.26902804745686e-235	2.60931	0.086	0.013	3.21711300310788e-231	B intermediate	SOWAHD
2.28255681915352e-234	-1.14859	0.767	0.857	5.78650979223609e-230	B intermediate	GAPDH
5.63085716995676e-234	3.43018	0.05	0.004	1.42747860115574e-229	B intermediate	VAV3-AS1
8.93958301586254e-234	1.77205	0.209	0.058	2.26627369035131e-229	B intermediate	SYVN1
9.85072620965619e-233	-4.53705	0.038	0.333	2.49725760140994e-228	B intermediate	AIF1
3.36844348559356e-232	-1.9426	0.171	0.479	8.53934108032823e-228	B intermediate	BIN2
4.64374167220961e-232	1.48669	0.329	0.123	1.17723495132186e-227	B intermediate	SHMT2
5.25813099649856e-232	-4.68228	0.01	0.301	1.33298878892235e-227	B intermediate	ZAP70
2.05220147047577e-230	2.31096	0.115	0.021	5.20253594780312e-226	B intermediate	SNX25
2.14373633060096e-230	2.70883	0.079	0.011	5.43458597170649e-226	B intermediate	TSPAN33
2.33956819943591e-230	3.39614	0.046	0.004	5.93103934238997e-226	B intermediate	AC007381.1
5.10867194128408e-230	2.00019	0.188	0.05	1.29509942383493e-225	B intermediate	LINC02245
5.41188778088257e-230	1.67716	0.304	0.109	1.37196767133154e-225	B intermediate	LRMP
2.16392782563615e-229	-4.81882	0.013	0.303	5.48577343077021e-225	B intermediate	GZMM
2.29843816863005e-229	2.2057	0.143	0.031	5.82677060129405e-225	B intermediate	SNX8
1.04948102369437e-228	1.37822	0.44	0.198	2.66053934316761e-224	B intermediate	BTG2
2.09508743900148e-228	3.37493	0.049	0.004	5.31125616661266e-224	B intermediate	SLC38A11
2.95121851841308e-228	2.07896	0.172	0.043	7.48163406602899e-224	B intermediate	NFKBID
2.34078028381351e-227	3.87724	0.039	0.003	5.93411209749564e-223	B intermediate	DPF3
5.45122039861516e-227	0.854587	0.8	0.543	1.38193888325293e-222	B intermediate	LTB
7.74445559733109e-227	2.53647	0.043	0.003	1.9632969384794e-222	B intermediate	IGHA2
2.46560093853661e-226	3.83029	0.031	0.002	6.25054493928415e-222	B intermediate	BX284613.2
1.38563710129357e-225	3.82588	0.039	0.003	3.51272861548934e-221	B intermediate	TNFSF9
2.87317276252447e-223	-2.78329	0.096	0.387	7.28378027027579e-219	B intermediate	CTSD
2.29433999383332e-222	4.62258	0.02	0.001	5.81638131836685e-218	B intermediate	IL6
9.53521751054703e-222	-4.98886	0.024	0.308	2.41727299109878e-217	B intermediate	CTSW
7.36065233329844e-221	2.97321	0.06	0.007	1.86599897301449e-216	B intermediate	IGLC1
1.44509080740464e-220	1.34716	0.397	0.169	3.6634497058515e-216	B intermediate	PRDM2
1.55263862027939e-220	2.4616	0.066	0.008	3.93609416627028e-216	B intermediate	AL161781.2
7.04380850581103e-220	1.97688	0.26	0.087	1.78567589430816e-215	B intermediate	PRKCE
1.45441072286404e-219	2.55452	0.086	0.013	3.68707662353262e-215	B intermediate	FADS3
9.24785042801141e-219	1.02486	0.427	0.182	2.34442256200517e-214	B intermediate	IFNGR2
1.90737638032619e-218	1.58069	0.26	0.087	4.83538986176493e-214	B intermediate	FUT8
3.15612254565803e-218	-2.4716	0.097	0.391	8.00108626549768e-214	B intermediate	LEPROTL1
1.90503321171568e-217	2.09049	0.154	0.037	4.82944969502042e-213	B intermediate	C11orf24
2.03639625009891e-217	3.73367	0.033	0.002	5.16246813362574e-213	B intermediate	GPT2
1.45758727144631e-216	-1.13183	0.745	0.816	3.69512949184355e-212	B intermediate	VIM
9.53762101961387e-216	1.87472	0.186	0.051	2.41788230468231e-211	B intermediate	RABEP2
2.24934155284864e-215	1.37463	0.427	0.194	5.70230577062659e-211	B intermediate	MEF2A
1.64699385177565e-214	1.64625	0.215	0.064	4.17529411363645e-210	B intermediate	METTL7A
3.39544636329321e-214	1.33582	0.445	0.205	8.60779607558461e-210	B intermediate	UVRAG
1.40947625654271e-213	0.398602	0.969	0.975	3.57316325796143e-209	B intermediate	RPS8
2.84967780801769e-213	1.59395	0.238	0.076	7.22421821110565e-209	B intermediate	MCM5
1.83252845800048e-212	-4.36824	0.022	0.297	4.64564289387701e-208	B intermediate	DOK2
4.96004526377606e-212	-3.61163	0.03	0.311	1.25742107481987e-207	B intermediate	BCL11B
8.89270857544429e-211	-2.84854	0.055	0.344	2.25439055096088e-206	B intermediate	PRKCH
9.02638554027009e-211	2.05676	0.055	0.006	2.28827899831387e-206	B intermediate	IGHV4-39
9.48128180400479e-211	-3.18587	0.036	0.318	2.40359975013325e-206	B intermediate	AAK1
1.08867621210227e-210	3.79831	0.04	0.003	2.75990306530047e-206	B intermediate	IGHV3-48
1.56662636394513e-210	-0.781206	0.877	0.919	3.97155449523729e-206	B intermediate	PFN1
1.14826747996188e-209	1.56851	0.246	0.081	2.91097288845136e-205	B intermediate	PLEKHF2
3.25270782294814e-209	-3.66892	0.032	0.308	8.24593960195582e-205	B intermediate	TCF7
2.10402647763384e-208	1.66141	0.233	0.075	5.33391752344955e-204	B intermediate	RNF141
5.79876205403777e-208	2.50919	0.087	0.014	1.47004416831911e-203	B intermediate	MYO1C
4.06239142268485e-207	2.47152	0.082	0.013	1.02985684956484e-202	B intermediate	ADAMTS6
2.34918698916166e-206	1.61891	0.229	0.072	5.95542393622371e-202	B intermediate	P2RY10
5.48014908842805e-206	-3.24482	0.053	0.329	1.38927259540739e-201	B intermediate	TIMP1
3.59751525559099e-205	2.24264	0.127	0.028	9.12006092444871e-201	B intermediate	C11orf80
6.23103343973499e-205	1.39692	0.296	0.111	1.57962928730722e-200	B intermediate	CSGALNACT1
2.84429106661103e-204	6.33453	0.011	0	7.21056228296562e-200	B intermediate	OSBPL10-AS1
1.12026641062465e-203	-2.78825	0.104	0.381	2.83998737757456e-199	B intermediate	MT2A
1.14529505688642e-203	-1.90874	0.186	0.474	2.90343749871277e-199	B intermediate	DPYD
2.26068456458601e-203	2.81799	0.062	0.008	5.73106143968199e-199	B intermediate	KLF8
3.83013401872532e-203	-5.08672	0.006	0.268	9.70977275087055e-199	B intermediate	PRKCQ-AS1
6.41837876585655e-203	1.25788	0.258	0.087	1.62712320093229e-198	B intermediate	MARCKS
9.1684613368654e-203	3.43881	0.037	0.003	2.32429663350875e-198	B intermediate	DOK7
1.38539175321092e-202	2.0886	0.137	0.032	3.51210663356499e-198	B intermediate	PTK2
2.51059099618542e-202	4.17782	0.029	0.002	6.36459923442966e-198	B intermediate	IGKV1-39
4.7277326594004e-202	1.2626	0.464	0.229	1.19852750648459e-197	B intermediate	LMBRD1
7.23910836003503e-202	3.27383	0.043	0.004	1.83518636035248e-197	B intermediate	CRACR2B
8.74469886366188e-202	1.49544	0.239	0.078	2.21686860892692e-197	B intermediate	DDAH2
1.03081785098627e-200	4.45888	0.027	0.002	2.6132263340353e-196	B intermediate	IGKV2-30
1.06456784752943e-200	2.38526	0.112	0.023	2.69878595027186e-196	B intermediate	CCDC191
4.99064448687328e-200	3.64259	0.038	0.003	1.26517828386725e-195	B intermediate	DSP
2.65220499597933e-199	4.20713	0.025	0.001	6.72360488530721e-195	B intermediate	ABCA6
9.27152968317871e-199	1.43442	0.313	0.122	2.35042548998263e-194	B intermediate	ATP2A3
1.75603315173729e-198	0.39752	0.966	0.962	4.45171964296921e-194	B intermediate	RPS23
1.86336244548693e-197	-3.70473	0.032	0.299	4.72381013555391e-193	B intermediate	LEF1
4.11338495519286e-197	2.78632	0.067	0.009	1.04278421999094e-192	B intermediate	LY86-AS1
6.342660358038e-197	3.38746	0.043	0.004	1.60792782736621e-192	B intermediate	IGHV4-34
7.98511437757375e-197	-2.71816	0.041	0.313	2.02430634585872e-192	B intermediate	SORL1
4.43586009643538e-196	1.37959	0.327	0.132	1.12453489304733e-191	B intermediate	PDE4B
7.14244111983581e-194	1.14452	0.355	0.148	1.81068024828958e-189	B intermediate	TMEM154
1.11780011683512e-191	3.14137	0.043	0.004	2.83373507618871e-187	B intermediate	MRVI1-AS1
1.19638636705882e-191	1.57256	0.193	0.057	3.03295907913081e-187	B intermediate	DUS2
2.21657101877308e-191	3.33805	0.037	0.003	5.61922918969164e-187	B intermediate	TNFRSF17
4.71843486459117e-191	3.13801	0.046	0.005	1.19617042252251e-186	B intermediate	NIPSNAP3B
8.45303848177873e-191	-4.62544	0.064	0.318	2.14292978551573e-186	B intermediate	CST3
1.25615016785162e-190	1.68069	0.153	0.04	3.18446629052064e-186	B intermediate	SIGLEC10
2.05608525621593e-190	-4.63116	0.008	0.258	5.21238173303299e-186	B intermediate	ID2
4.0913064206594e-190	3.06695	0.046	0.005	1.03718709070136e-185	B intermediate	ARHGAP42
5.91353527053388e-190	4.83566	0.015	0	1.49914032643304e-185	B intermediate	FA2H
7.05543644487461e-190	1.28482	0.434	0.208	1.78862369314016e-185	B intermediate	PPP3CA
8.69139715310975e-189	3.58394	0.037	0.003	2.20335609228485e-184	B intermediate	IGHV3-33
4.65362277514277e-188	2.20695	0.105	0.021	1.17973990972644e-183	B intermediate	PHACTR1
5.1738607555227e-188	-2.51341	0.112	0.369	1.31162544013256e-183	B intermediate	LIME1
1.01864927796248e-187	0.989343	0.418	0.188	2.58237778456268e-183	B intermediate	CTSH
1.34268847164315e-187	4.58238	0.027	0.002	3.40384954446256e-183	B intermediate	IGLV10-54
5.27958203667137e-187	3.56826	0.027	0.002	1.33842684211656e-182	B intermediate	AC233755.1
7.18879528958021e-187	1.81154	0.18	0.052	1.82243149386148e-182	B intermediate	GUCD1
7.50375389787194e-187	1.06002	0.642	0.384	1.90227665064952e-182	B intermediate	PRKCB
1.52368104051703e-186	-2.53811	0.102	0.363	3.86268380581471e-182	B intermediate	MYO1F
9.9693518362218e-186	-4.6029	0.016	0.264	2.52733038400059e-181	B intermediate	CEBPD
1.06663076737512e-184	4.2239	0.05	0.006	2.70401565837266e-180	B intermediate	IGKV3-15
5.8995075222134e-184	0.991413	0.558	0.312	1.49558415195632e-179	B intermediate	PLAC8
6.30571164030763e-184	4.5925	0.015	0	1.59856095793439e-179	B intermediate	AC073072.1
7.33916950320495e-184	0.579717	0.882	0.816	1.86055286075749e-179	B intermediate	EEF2
1.31251606655453e-183	2.52106	0.067	0.01	3.32735948032239e-179	B intermediate	RHOBTB2
1.9437948990658e-183	-4.04677	0.014	0.26	4.92771444862172e-179	B intermediate	SPN
5.3930013937258e-183	-0.899014	0.728	0.807	1.36717978332343e-178	B intermediate	MYL12A
3.67434439166375e-182	3.56833	0.034	0.003	9.31483046730677e-178	B intermediate	STK33
6.0136657534942e-182	2.52197	0.095	0.019	1.52452440516832e-177	B intermediate	LINC02422
4.42774800909805e-181	-0.999077	0.666	0.777	1.12247839778645e-176	B intermediate	CALM1
6.63105865421082e-181	1.90997	0.127	0.03	1.68103967942898e-176	B intermediate	CBFA2T3
1.0527315693359e-180	2.14121	0.128	0.031	2.66877980142344e-176	B intermediate	FXYD1
7.73264031828416e-180	2.36192	0.087	0.016	1.96030164708822e-175	B intermediate	ST14
6.24400328713658e-179	-2.17268	0.14	0.396	1.58291727332199e-174	B intermediate	SLC9A3R1
1.79523975405596e-178	2.33984	0.081	0.014	4.55111230050726e-174	B intermediate	BEND5
1.32586492550119e-177	3.22546	0.035	0.003	3.36120017263808e-173	B intermediate	PTPRG
1.26687334547033e-176	2.85178	0.08	0.014	3.21165061810184e-172	B intermediate	MIR155HG
1.29600476602089e-176	-4.06812	0.031	0.272	3.28550168233955e-172	B intermediate	TRBC1
9.26886558329538e-176	2.71281	0.059	0.008	2.34975011402121e-171	B intermediate	TTC21A
2.21122485405147e-175	2.39579	0.062	0.009	5.60567612750587e-171	B intermediate	AC017104.1
1.12210720372096e-174	3.89593	0.022	0.001	2.844653972153e-170	B intermediate	LAMA5
1.95548889827398e-174	-3.82308	0.018	0.258	4.95735990601435e-170	B intermediate	ITK
2.12733048332228e-174	1.62324	0.192	0.06	5.39299550827032e-170	B intermediate	TENT5C
1.65089830812655e-173	3.69737	0.027	0.002	4.18519230093162e-169	B intermediate	HRK
3.74048380658444e-173	1.44422	0.388	0.185	9.48250049807221e-169	B intermediate	CAMK2D
3.79571337842214e-173	4.06216	0.037	0.003	9.62251298563798e-169	B intermediate	IGLV3-1
4.18616059864025e-173	2.77158	0.051	0.006	1.06123357336129e-168	B intermediate	PMEPA1
3.57287442683571e-171	-4.18409	0.02	0.253	9.0575939594712e-167	B intermediate	LGALS3
1.04022395080378e-170	3.10167	0.033	0.003	2.63707173768265e-166	B intermediate	DNASE1L3
1.06383804558339e-170	1.12883	0.43	0.212	2.69693582935845e-166	B intermediate	REL
1.6285835956506e-169	-2.47376	0.057	0.306	4.12862227333383e-165	B intermediate	PITPNC1
3.66597339923864e-169	-1.86767	0.14	0.397	9.29360916440988e-165	B intermediate	FYN
4.56681774804049e-169	3.04015	0.052	0.007	1.15773396730574e-164	B intermediate	AC092546.1
4.65312061046891e-169	-4.56725	0.035	0.266	1.17961260595997e-164	B intermediate	FCN1
8.15684827347314e-169	0.417804	0.976	0.961	2.06784260580817e-164	B intermediate	MT-CO2
9.81167196282135e-169	3.36713	0.034	0.003	2.48735695929484e-164	B intermediate	DMD
1.02998917453894e-168	-3.18448	0.027	0.265	2.61112555637367e-164	B intermediate	CAMK4
2.50929437723629e-168	1.55809	0.188	0.06	6.36131217573171e-164	B intermediate	GNB5
1.47104565796832e-167	-2.07957	0.119	0.367	3.72924784751548e-163	B intermediate	ABRACL
2.50621382685308e-167	1.20632	0.324	0.138	6.35350267245524e-163	B intermediate	GPR183
2.8523143799386e-167	-5.16855	0.019	0.246	7.23090218458233e-163	B intermediate	GZMA
3.11617537218279e-167	4.09469	0.031	0.002	7.89981618602059e-163	B intermediate	IGLV2-23
3.41653000144256e-167	3.76649	0.036	0.003	8.66124520665704e-163	B intermediate	IGHV3-15
1.20344573611947e-166	1.86615	0.157	0.045	3.05085528563648e-162	B intermediate	KCNQ5
1.84508315418732e-166	-4.09428	0.055	0.287	4.67747030418028e-162	B intermediate	LST1
1.97230126388728e-166	1.64745	0.217	0.075	4.99998093408063e-162	B intermediate	TRAF5
7.96942999423846e-166	3.38686	0.031	0.002	2.02033019783939e-161	B intermediate	IGHV1-3
8.16585059443324e-166	1.31331	0.3	0.124	2.07012478419477e-161	B intermediate	DRAM2
1.69970609344723e-165	2.20314	0.088	0.017	4.30892491749807e-161	B intermediate	TP53I11
7.3733067707934e-165	-0.748981	0.781	0.854	1.86920699946384e-160	B intermediate	ACTG1
8.94352048709713e-165	-5.10819	0.025	0.251	2.26727187868399e-160	B intermediate	CST7
9.97285806839436e-165	-5.59749	0.05	0.278	2.52821924891865e-160	B intermediate	NKG7
6.20163204144775e-164	4.43937	0.025	0.002	1.57217573882742e-159	B intermediate	IGHV2-5
9.73007864618546e-164	1.58492	0.16	0.047	2.46667223759448e-159	B intermediate	CCR6
9.20925337646615e-163	1.21627	0.394	0.192	2.33463782346793e-158	B intermediate	PTPN1
1.44919248009607e-162	1.37141	0.242	0.09	3.67384785629154e-158	B intermediate	KDM4B
1.15316143129981e-161	1.56038	0.216	0.075	2.92337954448814e-157	B intermediate	TRIO
2.89816784455127e-161	1.97651	0.108	0.025	7.34714530272193e-157	B intermediate	C12orf42
3.97858022476048e-161	-1.7955	0.158	0.402	1.00860987277903e-156	B intermediate	ARRB2
9.21826223911798e-161	1.56558	0.233	0.086	2.3369216602388e-156	B intermediate	DNAJC10
1.91804829008423e-160	2.54496	0.058	0.008	4.86244422019254e-156	B intermediate	WEE1
1.95398101820585e-160	1.63102	0.172	0.053	4.95353727925364e-156	B intermediate	RIPOR1
2.05075870289538e-160	1.02551	0.308	0.127	5.19887838771009e-156	B intermediate	LAT2
3.49659146528204e-160	-0.820696	0.766	0.837	8.86420902363651e-156	B intermediate	MYL6
4.19344084359488e-160	1.52665	0.195	0.065	1.06307918825974e-155	B intermediate	CHD7
1.00361347263546e-159	1.4123	0.246	0.094	2.54426051447815e-155	B intermediate	PIKFYVE
1.14217911528696e-159	-4.18205	0.009	0.228	2.89553827516398e-155	B intermediate	CD4
1.15819266241619e-159	-0.949688	0.509	0.688	2.93613421849129e-155	B intermediate	GMFG
2.10604284547626e-159	-5.17007	0.006	0.222	5.33902921756685e-155	B intermediate	MAL
4.94689447839821e-159	0.389513	0.983	0.966	1.25408721921873e-154	B intermediate	MT-CO1
5.95972210431507e-159	-0.658425	0.817	0.884	1.51084915066491e-154	B intermediate	SERF2
6.27347949669619e-159	-4.9413	0.008	0.224	1.59038978720745e-154	B intermediate	JAML
9.90423033215201e-159	3.97932	0.023	0.001	2.51082143150386e-154	B intermediate	IGKV1D-39
1.91427722875216e-158	1.45706	0.272	0.11	4.85288420260961e-154	B intermediate	DMXL1
2.51247122297851e-158	3.35155	0.023	0.001	6.36936579737283e-154	B intermediate	IGHV3-53
5.1135495031525e-158	-3.66789	0.023	0.247	1.29633593454419e-153	B intermediate	INPP4B
6.64515001975972e-158	-2.99584	0.039	0.268	1.68461198150929e-153	B intermediate	TC2N
1.4138093193287e-157	1.85274	0.113	0.027	3.58414800543018e-153	B intermediate	SH2B2
2.64419902716344e-157	4.3397	0.019	0.001	6.70330895376203e-153	B intermediate	SYBU
9.60069994079601e-157	1.95468	0.135	0.037	2.4338734419912e-152	B intermediate	METTL8
3.10916335491937e-156	-2.65859	0.074	0.304	7.88204002105609e-152	B intermediate	FLT3LG
3.23464205825265e-156	-1.21569	0.387	0.583	8.20014108187629e-152	B intermediate	GSTK1
9.45259491450595e-156	4.06724	0.019	0.001	2.3963273367764e-151	B intermediate	CD80
2.07263308178749e-155	-4.77995	0.099	0.317	5.25433212563946e-151	B intermediate	LYZ
2.30298958153195e-155	-0.980669	0.626	0.727	5.83830888814164e-151	B intermediate	SARAF
2.6693455037862e-155	2.92005	0.041	0.005	6.76705778664841e-151	B intermediate	AC006230.1
7.24192896690263e-155	-5.12338	0.094	0.313	1.83590141239949e-150	B intermediate	S100A9
2.68605826137373e-154	3.1907	0.034	0.003	6.80942629840854e-150	B intermediate	AC083949.1
3.27230364890795e-154	1.37342	0.285	0.119	8.29561698034656e-150	B intermediate	PLEKHA2
6.70646245523777e-154	4.71462	0.015	0.001	1.70015529702733e-149	B intermediate	ARHGAP20
7.75070594521368e-154	-4.41988	0.009	0.221	1.96488146417112e-149	B intermediate	PXN
2.01472793995285e-153	-2.94136	0.032	0.257	5.10753680057448e-149	B intermediate	PDE3B
1.24962143999307e-152	1.06586	0.406	0.203	3.16791531252642e-148	B intermediate	CIAO2A
6.46228581347959e-152	4.46178	0.02	0.001	1.63825407657521e-147	B intermediate	IGKV1-17
2.21032898496571e-151	-0.471832	0.96	0.968	5.60340500978658e-147	B intermediate	TPT1
4.03536060669032e-150	3.70293	0.029	0.002	1.02300426740206e-145	B intermediate	PEBP4
4.53626219966323e-150	1.67244	0.148	0.043	1.14998783023663e-145	B intermediate	SGPP1
4.81003591697971e-149	-5.22238	0.019	0.227	1.21939220531353e-144	B intermediate	PRF1
7.56499322101111e-149	-1.88284	0.242	0.448	1.91780143145853e-144	B intermediate	NOSIP
1.08472919330201e-148	-2.93294	0.032	0.249	2.74989697793994e-144	B intermediate	SLFN5
1.37588478528507e-148	-1.62771	0.178	0.41	3.48800551917617e-144	B intermediate	RGS10
4.95596491799614e-148	0.415684	0.968	0.945	1.2563866663612e-143	B intermediate	MT-CO3
1.84732419604929e-147	1.04008	0.466	0.256	4.68315156940455e-143	B intermediate	SNHG7
1.98181277665198e-147	4.95725	0.012	0	5.02409357009045e-143	B intermediate	AC068898.1
3.32153508617851e-147	2.99815	0.048	0.006	8.42042359697115e-143	B intermediate	AL078459.1
3.76790213665341e-147	-5.20968	0.09	0.302	9.55200870663007e-143	B intermediate	S100A8
2.7317085381146e-146	-1.26897	0.157	0.412	6.92515431497432e-142	B intermediate	SKAP1
8.59058396327321e-146	-4.44313	0.017	0.222	2.17779894052939e-141	B intermediate	SERPINA1
1.05983321115705e-145	3.26111	0.028	0.002	2.68678317360423e-141	B intermediate	MAPK10
2.60810743636519e-145	2.08479	0.079	0.016	6.61181316192939e-141	B intermediate	CCDC106
4.14987087907294e-145	1.92147	0.133	0.037	1.05203376655378e-140	B intermediate	CLIC4
2.32768884016629e-144	1.04159	0.421	0.222	5.90092397870556e-140	B intermediate	HERPUD1
3.09688835501631e-144	3.43819	0.042	0.005	7.85092166880185e-140	B intermediate	IGKV3-11
7.43584968096536e-143	-3.79648	0.013	0.215	1.88506225262153e-138	B intermediate	UPP1
8.63663638702524e-143	1.70718	0.229	0.09	2.18947369047477e-138	B intermediate	LHPP
1.22448325356453e-142	-3.85899	0.036	0.243	3.10418749611145e-138	B intermediate	VCAN
2.03742726804563e-142	-1.57021	0.343	0.51	5.16508186722248e-138	B intermediate	PCED1B-AS1
4.90173131155822e-142	4.51694	0.011	0	1.24263790479312e-137	B intermediate	LINC02201
8.26445774650113e-142	1.23912	0.284	0.121	2.0951226833155e-137	B intermediate	MAP4K1
7.06718500722107e-141	2.97602	0.043	0.005	1.79160207118061e-136	B intermediate	GRAMD1C
1.24633788222328e-140	1.05485	0.281	0.118	3.15959116522424e-136	B intermediate	HSH2D
1.90525540223469e-140	3.85605	0.022	0.001	4.83001297020517e-136	B intermediate	HSPA12A
3.14657706251344e-140	1.12319	0.349	0.165	7.97688751117781e-136	B intermediate	WASHC4
4.68027090914399e-140	1.75363	0.159	0.051	1.18649547817709e-135	B intermediate	ID3
5.9426499106735e-140	5.45935	0.01	0	1.50652117885484e-135	B intermediate	TSBP1
1.53320043558872e-139	1.90293	0.141	0.042	3.88681642426096e-135	B intermediate	TFEC
2.64907517482073e-139	0.842233	0.594	0.377	6.71567047568803e-135	B intermediate	ISG20
3.97448413589906e-139	4.21804	0.019	0.001	1.00757147329177e-134	B intermediate	IGLV6-57
8.66124589188669e-139	-2.96576	0.037	0.245	2.19571244605219e-134	B intermediate	MGAT4A
9.7824495083918e-139	4.09612	0.018	0.001	2.47994877487241e-134	B intermediate	IGLVI-70
1.36870926120817e-138	-2.21794	0.07	0.29	3.46981484808884e-134	B intermediate	CD96
2.00224261277596e-138	3.65403	0.036	0.004	5.07588524764834e-134	B intermediate	IGLV1-40
1.41821761855253e-137	1.0982	0.327	0.152	3.59532348479253e-133	B intermediate	CHD9
1.5561932508988e-137	0.515479	0.865	0.807	3.94510551035356e-133	B intermediate	RPS11
2.44544301162821e-137	4.46852	0.018	0.001	6.19944257877868e-133	B intermediate	TLCD4
4.00115901387107e-137	3.34916	0.024	0.002	1.01433382160645e-132	B intermediate	MACC1
4.93570336318297e-137	4.18662	0.018	0.001	1.25125015960052e-132	B intermediate	C12orf74
9.60396861520879e-137	-4.33023	0.021	0.216	2.43470208364158e-132	B intermediate	CFD
1.79584041368366e-136	-5.10036	0.006	0.196	4.55263503272945e-132	B intermediate	CSTA
2.12568276999033e-136	1.63839	0.161	0.053	5.38881839020248e-132	B intermediate	CCNG2
4.87740091148962e-136	0.386616	0.936	0.902	1.23646990507173e-131	B intermediate	RPS5
5.12394528627493e-136	-3.55003	0.019	0.216	1.29897136952356e-131	B intermediate	STAT4
9.73331119918609e-136	-4.01848	0.01	0.202	2.46749172210567e-131	B intermediate	PRKCQ
1.92941795431942e-135	2.63158	0.048	0.007	4.89126745599516e-131	B intermediate	FBXO10
5.99990260385035e-135	-2.35898	0.06	0.271	1.5210353091021e-130	B intermediate	FKBP5
6.83684788501769e-135	3.89696	0.015	0.001	1.73320930733083e-130	B intermediate	GNG3
1.7596695062545e-134	1.20045	0.273	0.117	4.46093816530579e-130	B intermediate	ANKRD13A
3.40307343815403e-134	-3.27191	0.039	0.239	8.62713147306428e-130	B intermediate	SYTL3
9.83943518652176e-134	3.29505	0.037	0.004	2.49439521413513e-129	B intermediate	IGHV1-2
3.70404910780732e-133	3.14578	0.047	0.007	9.39013489320235e-129	B intermediate	IGLV1-44
6.59623732027137e-133	1.77189	0.142	0.044	1.672212123062e-128	B intermediate	MARCH3
1.09598148341618e-132	-4.28607	0.076	0.273	2.77842265860836e-128	B intermediate	CCL5
1.16706902411375e-132	-3.62784	0.016	0.208	2.95863668303077e-128	B intermediate	TXK
1.00822000695022e-131	0.907469	0.638	0.438	2.55593853961951e-127	B intermediate	SP100
2.30129408019101e-131	2.46968	0.024	0.002	5.83401062269223e-127	B intermediate	IGLV2-8
3.0159106270969e-131	0.770256	0.656	0.462	7.64563503075334e-127	B intermediate	RCSD1
3.66961427556768e-131	1.76631	0.17	0.059	9.30283914999162e-127	B intermediate	RHOB
3.71208721136105e-131	1.65898	0.141	0.043	9.41051228952139e-127	B intermediate	BICD1
4.79689083987295e-131	1.00942	0.478	0.272	1.21605979681619e-126	B intermediate	TBC1D5
5.51991784202217e-131	-3.30509	0.025	0.219	1.39935437213104e-126	B intermediate	CD6
1.72006867174273e-130	2.76575	0.036	0.004	4.360546089735e-126	B intermediate	WASF1
2.26923348829513e-130	-4.58123	0.01	0.195	5.75273381617699e-126	B intermediate	CFP
6.71766458615038e-130	1.82567	0.128	0.038	1.70299514923498e-125	B intermediate	ALCAM
7.01877224775607e-130	-5.67644	0.004	0.184	1.77932895252864e-125	B intermediate	TMEM173
8.75426733614533e-130	3.78178	0.016	0.001	2.2192943123862e-125	B intermediate	CYB5R2
2.08510232583608e-129	1.14531	0.325	0.156	5.28594290622705e-125	B intermediate	SPINT2
2.1431680673293e-129	1.17386	0.31	0.143	5.4331453674865e-125	B intermediate	UBE2E2
2.33517577896905e-129	0.884871	0.523	0.318	5.91990411726444e-125	B intermediate	CHCHD10
3.86340510555915e-129	1.50632	0.163	0.055	9.79411828310299e-125	B intermediate	RFX5
9.22362720730785e-129	2.40807	0.063	0.011	2.33828173332461e-124	B intermediate	AEBP1
[truncated: 162,950 more rows]
