# Supplementary material for: Maintenance of chronic neuroinflammation in multiple sclerosis via interferon signaling and CD8 T cell-mediated cytotoxicity
Source: bioRxiv preprint, doi:10.1101/2025.06.09.658729, version 1 (2025-06-11)
Supplement: Supplementary File 3 [file 658729_file06.xlsx]

## Sheet: csf.myeloidL2.markers
p_val	avg_log2FC	pct.1	pct.2	p_val_adj	cluster	gene
0	-2.71036	0.292	0.866	0	M1	HLA-B
0	-4.37338	0.135	0.706	0	M1	MT-CO1
0	-2.93493	0.14	0.708	0	M1	HLA-A
0	-4.60973	0.08	0.64	0	M1	MT-CO2
0	-2.41637	0.245	0.785	0	M1	HLA-C
0	-4.4865	0.068	0.605	0	M1	MT-CO3
0	-4.31621	0.064	0.579	0	M1	MT-CYB
0	-5.62956	0.11	0.624	0	M1	MALAT1
0	-2.33777	0.307	0.813	0	M1	PSAP
0	-3.89334	0.089	0.591	0	M1	MTRNR2L12
0	-4.24472	0.054	0.555	0	M1	MT-ATP6
0	-4.3241	0.053	0.547	0	M1	MT-ND3
0	-1.8162	0.298	0.772	0	M1	ITM2B
0	-4.79396	0.028	0.498	0	M1	MT-ND1
0	-4.49847	0.036	0.502	0	M1	MT-ND4
0	-4.17433	0.043	0.507	0	M1	MT-ND4L
0	-2.47292	0.183	0.641	0	M1	SRGN
0	-1.76351	0.19	0.644	0	M1	HLA-E
0	-2.7301	0.068	0.521	0	M1	GRN
0	-1.77772	0.19	0.636	0	M1	ITGB2
0	-3.24333	0.054	0.499	0	M1	PTPRC
0	-4.36569	0.025	0.466	0	M1	MT-ND5
0	-2.27659	0.082	0.516	0	M1	TMBIM6
0	-1.68483	0.33	0.763	0	M1	CYBA
0	-2.02491	0.147	0.58	0	M1	CTSB
0	-2.30963	0.355	0.787	0	M1	HLA-DRB5
0	-2.11858	0.31	0.741	0	M1	HLA-DQB1
0	-4.33415	0.025	0.452	0	M1	MT-ND2
0	-2.3589	0.214	0.627	0	M1	IFI30
0	-3.72115	0.036	0.423	0	M1	PLXDC2
0	-1.85973	0.229	0.616	0	M1	EMP3
0	-2.77935	0.199	0.584	0	M1	LYZ
0	-2.69194	0.06	0.444	0	M1	HSP90B1
0	-1.33379	0.2	0.583	0	M1	RNASET2
0	-1.81768	0.152	0.531	0	M1	CTSS
0	-2.0465	0.09	0.462	0	M1	CSF1R
0	-2.48782	0.559	0.931	0	M1	HLA-DRB1
0	-1.88959	0.117	0.486	0	M1	SERPINA1
0	-1.86357	0.157	0.517	0	M1	ZFP36L2
0	-1.78257	0.091	0.447	0	M1	FCGRT
0	-2.88646	0.032	0.387	0	M1	MTDH
0	-3.03596	0.034	0.388	0	M1	FGL2
0	-1.98998	0.127	0.479	0	M1	TXNIP
0	-2.68316	0.057	0.402	0	M1	AHNAK
0	-1.85677	0.117	0.452	0	M1	BTG1
0	-1.74357	0.386	0.718	0	M1	HLA-DQA1
0	-2.10222	0.226	0.557	0	M1	CD14
0	-1.72306	0.079	0.409	0	M1	ATP6V0B
0	-1.97963	0.086	0.415	0	M1	CALR
0	-1.51591	0.305	0.632	0	M1	S100A6
0	-2.00896	0.065	0.391	0	M1	PDIA3
0	-3.65716	0.023	0.347	0	M1	ZFP36
0	-3.10732	0.027	0.35	0	M1	APLP2
0	-3.77469	0.021	0.342	0	M1	JUNB
0	-2.78895	0.045	0.363	0	M1	CEBPD
0	-2.91039	0.039	0.355	0	M1	HERPUD1
0	-2.24344	0.05	0.357	0	M1	SYNGR2
0	-3.71782	0.02	0.321	0	M1	CPVL
0	-2.91662	0.021	0.311	0	M1	IQGAP1
0	-2.53185	0.032	0.317	0	M1	VSIR
0	-3.58806	0.018	0.302	0	M1	TNFRSF1B
0	-3.73709	0.014	0.293	0	M1	RNF149
0	-5.51081	0.005	0.283	0	M1	NEAT1
0	-3.9321	0.016	0.282	0	M1	SLC8A1
0	-1.63166	0.805	0.981	0	M1	B2M
0	-1.34063	0.787	0.93	0	M1	CST3
0	-1.20537	0.86	0.945	0	M1	HLA-DPA1
0	0.809044	0.898	0.815	0	M1	RPL38
0	0.80071	0.938	0.858	0	M1	RPS29
0	0.768916	0.95	0.872	0	M1	RPL37A
0	-1.45105	0.88	0.956	0	M1	HLA-DRA
0	0.698639	0.952	0.877	0	M1	RPL35
0	0.685538	0.958	0.884	0	M1	RPL9
0	0.685272	0.936	0.867	0	M1	RPL23A
0	0.734247	0.948	0.881	0	M1	RPL22
0	0.757391	0.962	0.895	0	M1	RPL36A
0	0.754583	0.912	0.848	0	M1	EEF1G
0	0.788646	0.97	0.906	0	M1	RPL21
0	0.721502	0.93	0.87	0	M1	EEF1B2
0	0.655434	0.969	0.91	0	M1	RPL15
0	0.748426	0.969	0.914	0	M1	RPS25
0	0.640479	0.95	0.896	0	M1	RPS5
0	0.674535	0.952	0.899	0	M1	NACA
0	0.739148	0.987	0.935	0	M1	RPS6
0	0.756593	0.974	0.922	0	M1	RPL3
0	-1.80544	0.939	0.989	0	M1	CD74
0	0.639004	0.977	0.927	0	M1	RPL35A
0	0.65192	0.97	0.92	0	M1	RPL36
0	0.730231	0.989	0.943	0	M1	RPL37
0	0.623044	0.961	0.915	0	M1	RACK1
0	0.683614	0.989	0.945	0	M1	RPS2
0	0.697847	0.988	0.945	0	M1	RPL29
0	0.600959	0.981	0.938	0	M1	RPL6
0	0.705931	0.971	0.928	0	M1	RPL5
0	0.674017	0.991	0.95	0	M1	RPL34
0	0.730991	0.99	0.949	0	M1	RPL26
0	0.77949	0.99	0.949	0	M1	RPS4X
0	0.553826	0.979	0.939	0	M1	RPS7
0	0.722553	0.993	0.954	0	M1	RPS18
0	0.624776	0.981	0.943	0	M1	RPS15
0	0.6898	0.993	0.955	0	M1	RPL18A
0	0.604953	0.969	0.931	0	M1	RPL14
0	0.722947	0.994	0.957	0	M1	RPS3A
0	0.728574	0.994	0.958	0	M1	RPS27
0	0.558999	0.98	0.944	0	M1	RPL8
0	0.70198	0.989	0.953	0	M1	RPL12
0	0.652058	0.988	0.953	0	M1	RPS27A
0	0.69092	0.99	0.955	0	M1	RPS24
0	0.642312	0.99	0.955	0	M1	RPS13
0	0.561235	0.989	0.954	0	M1	RPS19
0	0.649108	0.989	0.954	0	M1	RPL39
0	0.62046	0.991	0.957	0	M1	RPS14
0	0.626039	0.98	0.946	0	M1	RPL7A
0	0.664905	0.995	0.963	0	M1	RPL32
0	0.716358	0.994	0.962	0	M1	RPS23
0	0.588093	0.992	0.96	0	M1	RPS15A
0	0.58885	0.987	0.957	0	M1	RPS3
0	0.596794	0.994	0.964	0	M1	RPL19
0	0.586127	0.989	0.959	0	M1	RPS28
0	0.524804	0.994	0.965	0	M1	RPL28
0	0.609914	0.997	0.971	0	M1	RPS8
0	0.715823	0.996	0.97	0	M1	RPL13
0	0.95399	0.999	0.973	0	M1	FTL
0	0.661677	0.995	0.97	0	M1	RPS12
0	0.599279	0.992	0.968	0	M1	RPL30
0	0.621236	0.995	0.972	0	M1	RPL11
0	0.778488	0.995	0.972	0	M1	TPT1
0	0.620595	0.999	0.978	0	M1	RPLP1
0	0.59507	0.998	0.98	0	M1	RPL41
0	0.646796	0.999	0.984	0	M1	RPL10
0	0.747598	1	0.991	0	M1	EEF1A1
5.26096626606057e-308	0.547897	0.995	0.972	1.23874711700662e-303	M1	TMSB4X
3.95900876153582e-304	-1.33255	0.199	0.57	9.32188202991224e-300	M1	SARAF
5.5331805921384e-304	0.673085	0.93	0.869	1.30284270222491e-299	M1	RPL24
6.48405103955425e-303	-1.96717	0.052	0.352	1.52673465777344e-298	M1	ATP6AP2
3.07408268375635e-301	-1.97825	0.069	0.377	7.2382350871727e-297	M1	FCGR2A
1.88744398692293e-300	-4.2919	0.012	0.267	4.44417561160874e-296	M1	MT-ATP8
2.06000329970178e-300	-2.54037	0.03	0.306	4.8504837694778e-296	M1	ITGB1
1.71623493637953e-298	-1.95472	0.089	0.407	4.04104678119925e-294	M1	TIMP1
3.76551807857637e-298	0.655004	0.943	0.881	8.86628886781593e-294	M1	RPS16
6.06646683197432e-298	-1.84448	0.112	0.439	1.42841028025667e-293	M1	MBNL1
7.91202163764414e-298	0.628678	0.95	0.903	1.86296461479969e-293	M1	RPL17
1.16183105041606e-294	-2.1507	0.058	0.352	2.73564739130966e-290	M1	CELF2
4.4039605833941e-294	-1.69047	0.072	0.383	1.03695655896597e-289	M1	GLIPR1
1.22353215323228e-293	-2.45787	0.046	0.33	2.88092880800072e-289	M1	PLD4
9.26236701998654e-293	0.603479	0.949	0.902	2.18091693852603e-288	M1	RPS9
3.10646045699221e-292	-3.44869	0.013	0.265	7.31447179203387e-288	M1	ATP2B1
1.39161455081416e-290	-3.5957	0.013	0.264	3.27669562134702e-286	M1	ETV6
2.22169624023558e-290	-1.89809	0.058	0.353	5.2312059672587e-286	M1	PPT1
6.19983545498151e-287	-3.26467	0.016	0.269	1.45981325622995e-282	M1	IL17RA
7.94022260559664e-286	-2.37644	0.036	0.309	1.86960481471378e-281	M1	CD4
8.14191543900801e-285	-1.77832	0.053	0.342	1.91709540926883e-280	M1	RTN4
4.12169393305684e-284	0.65688	0.925	0.864	9.70494053477563e-280	M1	RPL10A
4.21402488042435e-284	-1.50067	0.098	0.419	9.92234298344716e-280	M1	CANX
1.12465434419173e-283	-3.94357	0.01	0.252	2.64811111883386e-279	M1	CD55
5.96149840927988e-283	-1.45477	0.188	0.534	1.40369441544904e-278	M1	CYBB
1.72528675651664e-282	-1.51801	0.085	0.396	4.06236019689408e-278	M1	SON
1.88086931595206e-282	0.522056	0.975	0.939	4.42869489134072e-278	M1	FAU
4.34061803384908e-282	-3.18194	0.018	0.269	1.0220419222501e-277	M1	FOXP1
5.24155088282625e-282	-2.15467	0.041	0.315	1.23417557087027e-277	M1	AKAP13
1.1702982535869e-280	-2.57316	0.029	0.29	2.75558426789571e-276	M1	CSF2RA
7.91793569122596e-279	-4.70524	0.008	0.244	1.86435713785606e-274	M1	MT-ND6
3.51810830941283e-277	-2.14481	0.038	0.306	8.28373782534345e-273	M1	KTN1
7.37397179619321e-275	-1.69949	0.061	0.35	1.73627539913165e-270	M1	TMEM59
3.41192616103198e-274	-1.9525	0.06	0.343	8.03372133876589e-270	M1	IFNGR1
1.6518199824418e-272	-1.83159	0.061	0.346	3.88937533065747e-268	M1	LAPTM4A
2.18041546707702e-271	-1.89061	0.068	0.354	5.13400625877956e-267	M1	CD86
4.04365945921414e-271	-1.44309	0.095	0.406	9.52120056266561e-267	M1	CD53
1.91562093586458e-270	-1.80556	0.061	0.343	4.51052105558674e-266	M1	PTPRE
1.65271218898852e-268	-2.06957	0.038	0.301	3.89147612019237e-264	M1	CMTM6
7.40430623429379e-268	-2.3729	0.03	0.284	1.74341794592681e-263	M1	WSB1
3.0841020488418e-267	-3.50444	0.026	0.27	7.2618266842029e-263	M1	KLF2
9.88697075469664e-267	-2.72545	0.027	0.277	2.32798613390087e-262	M1	MARCH1
3.91128592750874e-266	-2.55002	0.025	0.273	9.20951384491208e-262	M1	ANKRD12
7.19758892381843e-265	-2.97068	0.02	0.261	1.69474428800229e-260	M1	ANKRD44
1.13744500576769e-264	-2.78391	0.03	0.28	2.67822801058061e-260	M1	AOAH
1.8268126597056e-262	-2.99787	0.017	0.253	4.3014130885428e-258	M1	IL10RA
2.31289166058902e-262	-2.92122	0.019	0.256	5.44593470402292e-258	M1	PLAUR
3.17365092046354e-262	-2.93141	0.019	0.257	7.47267845732345e-258	M1	TM9SF2
4.34285643719921e-262	-2.19781	0.066	0.34	1.02256897670293e-257	M1	DPYD
1.87469519486076e-260	-1.62996	0.075	0.36	4.41415730581915e-256	M1	DOCK8
2.07476922468603e-258	-1.86087	0.044	0.306	4.88525161644573e-254	M1	BCAP31
1.60486728971378e-257	-2.12704	0.071	0.347	3.77882052036007e-253	M1	ZEB2
3.21233853598014e-257	-1.28508	0.152	0.479	7.56377231681885e-253	M1	CD63
1.49804282705718e-256	-3.07575	0.016	0.247	3.52729164058885e-252	M1	REL
3.31263262350843e-256	-2.253	0.034	0.284	7.79992477531294e-252	M1	RPN2
1.39971959234972e-255	-2.67019	0.031	0.275	3.29577975214665e-251	M1	FCGR2B
2.61331587760574e-255	0.515119	0.973	0.934	6.15331356541047e-251	M1	RPL18
6.04516459016707e-255	-2.63821	0.021	0.256	1.42339445440074e-250	M1	TGOLN2
3.61341581146187e-254	-2.98417	0.018	0.249	8.50814886966812e-250	M1	KLF6
7.52159898758752e-254	-1.95051	0.039	0.292	1.77103569761736e-249	M1	REEP5
1.46533644139519e-251	-1.17245	0.182	0.521	3.45028118490911e-247	M1	PPIB
5.61782097524752e-251	-1.50188	0.074	0.356	1.32277212683178e-246	M1	ARL6IP5
3.03770321440864e-250	-2.6623	0.019	0.249	7.15257598864658e-246	M1	ATP6AP1
3.42806222822971e-250	0.50874	0.976	0.946	8.07171532258968e-246	M1	RPLP0
5.00848290323061e-249	-1.96355	0.056	0.318	1.17929738439468e-244	M1	LIPA
5.57423186323798e-249	-2.86656	0.017	0.244	1.31250863451801e-244	M1	PNISR
5.16911784125735e-246	-3.10157	0.015	0.236	1.21712048690246e-241	M1	RSRP1
1.06354718664812e-245	-1.43657	0.075	0.355	2.50422820568167e-241	M1	TMBIM4
3.13898265241587e-245	-1.58574	0.081	0.36	7.39104855337842e-241	M1	PILRA
5.87357587031632e-243	-2.50415	0.026	0.258	1.38299217442468e-238	M1	HSPA5
2.14852086431884e-242	0.394888	1	0.979	5.05890722712513e-238	M1	FTH1
2.23475824500965e-242	-1.78013	0.058	0.318	5.26196176369972e-238	M1	ARL6IP1
3.49683137791987e-242	-2.73572	0.026	0.255	8.23363916245012e-238	M1	SSH2
1.46926844546694e-241	-1.74613	0.053	0.31	3.45953948169646e-237	M1	TBXAS1
5.4545181216018e-241	-2.46623	0.022	0.248	1.28432083691236e-236	M1	TPP1
2.34968288254124e-239	-2.1949	0.029	0.262	5.53256331523161e-235	M1	KMT2E
2.49178409213497e-239	0.533429	0.96	0.917	5.86715482334099e-235	M1	RPLP2
3.27905380089047e-239	0.624159	0.918	0.862	7.7208600795767e-235	M1	ATP5F1E
4.39829189871383e-239	-1.4901	0.064	0.329	1.03562181047116e-234	M1	CTSZ
2.34952474632387e-238	-2.88857	0.021	0.243	5.53219096769418e-234	M1	JMJD1C
1.07984995563446e-237	-2.87295	0.018	0.237	2.5426147055369e-233	M1	BTG2
1.08288630651103e-237	-3.96954	0.009	0.218	2.54976409731086e-233	M1	FOS
6.1225509354025e-237	-2.18536	0.036	0.272	1.44161584324987e-232	M1	MYO1F
1.21502503785257e-236	-2.68084	0.036	0.268	2.86089795412766e-232	M1	CFD
3.82846227440805e-235	0.675155	0.892	0.832	9.0144972713212e-231	M1	RPL4
1.49958692062099e-234	-1.09709	0.262	0.577	3.53092736329419e-230	M1	S100A10
1.66228575609574e-233	-1.2281	0.251	0.554	3.91401804130303e-229	M1	MS4A6A
1.27550059963258e-231	-1.08749	0.151	0.464	3.00329371189487e-227	M1	CTSH
1.36960961844807e-230	-1.49515	0.13	0.416	3.22488280759782e-226	M1	CXCL16
3.5322310815888e-230	-1.84517	0.043	0.283	8.316991304709e-226	M1	SRSF5
4.20290339828412e-230	-1.53198	0.056	0.308	9.8961563415998e-226	M1	COMT
4.97663830317036e-230	-2.50273	0.02	0.235	1.17179925486449e-225	M1	SMCHD1
2.77290431857655e-228	-2.0286	0.057	0.303	6.52908050852034e-224	M1	ARHGAP15
5.80512817224542e-228	-4.44028	0.006	0.204	1.36687547943691e-223	M1	DUSP1
1.56500880237135e-225	-1.81785	0.042	0.277	3.68496972606359e-221	M1	HM13
3.3813037093571e-225	-3.36679	0.023	0.234	7.96161771405223e-221	M1	RHOB
2.07604475867939e-224	-1.7971	0.041	0.273	4.88825498878649e-220	M1	RNF213
4.55465515822228e-224	-2.19433	0.024	0.24	1.07243910355502e-219	M1	ARGLU1
1.69305720529874e-223	-2.42307	0.042	0.269	3.98647249559641e-219	M1	CD9
1.47461318554585e-222	-2.7041	0.02	0.231	3.47212420668626e-218	M1	TLR2
2.49410189800886e-222	0.663802	0.88	0.816	5.87261232905165e-218	M1	RPL27
7.64636660889146e-222	-2.48227	0.023	0.236	1.80041348172958e-217	M1	GNAQ
1.47102174662163e-221	-2.82605	0.018	0.224	3.46366780459529e-217	M1	CD46
3.77604402018095e-221	-3.20316	0.018	0.224	8.89107324991808e-217	M1	SIPA1L1
4.70840087901434e-221	-1.50232	0.069	0.322	1.10864007097272e-216	M1	CTSC
3.86979904276241e-220	-2.00938	0.038	0.263	9.11182882608837e-216	M1	SORL1
4.03659443101632e-219	-1.31488	0.063	0.312	9.50456524727102e-215	M1	ACAP2
4.09069741753917e-219	-2.06383	0.034	0.256	9.63195613933772e-215	M1	USP15
1.44385112449563e-218	-2.59301	0.019	0.225	3.3996918577374e-214	M1	CSF3R
7.59429318476104e-218	-1.67668	0.048	0.282	1.78815227328384e-213	M1	RPN1
1.06514150873491e-217	-2.86585	0.013	0.212	2.50798219646722e-213	M1	LRP1
1.54606591502971e-217	-3.67357	0.008	0.201	3.64036680352897e-213	M1	FLNA
6.76305222687303e-217	-1.65205	0.052	0.289	1.59242827733952e-212	M1	STK4
1.64106381568356e-216	-1.49279	0.058	0.3	3.86404886040851e-212	M1	RBM39
3.0190845275618e-215	-1.65769	0.052	0.287	7.10873642859701e-211	M1	PDIA6
1.64107834928585e-214	-0.88366	0.405	0.693	3.86408308122846e-210	M1	HLA-DMA
1.93583638867032e-214	-3.39555	0.01	0.202	4.55812036076314e-210	M1	CIITA
3.72536762606091e-214	-1.74285	0.04	0.265	8.77175061232303e-210	M1	OS9
8.75074834424456e-214	-1.92853	0.035	0.255	2.06045120513582e-209	M1	RNF13
1.05853957594965e-213	-2.43955	0.024	0.232	2.49243728553105e-209	M1	JAML
1.16867079873826e-213	-1.86099	0.034	0.253	2.75175226270911e-209	M1	OTULINL
2.07162544809678e-213	-4.58618	0.005	0.19	4.87784928008868e-209	M1	AKAP9
1.31436526006873e-212	-1.93272	0.041	0.264	3.09480444135782e-208	M1	LPCAT2
2.47570815703601e-212	-3.94787	0.006	0.191	5.82930242655699e-208	M1	EPC1
4.10272443640709e-212	-3.62933	0.008	0.197	9.66027495796413e-208	M1	SLC16A3
9.61012102328412e-212	-1.70905	0.051	0.282	2.26279909614248e-207	M1	CD164
1.45947028059867e-210	-2.49523	0.018	0.218	3.43646872269762e-206	M1	ADA2
1.37814617111922e-209	-1.79016	0.041	0.262	3.24498297451732e-205	M1	ITGAM
2.78308975995656e-209	-1.04574	0.178	0.481	6.5530631487937e-205	M1	HLA-DMB
2.97476189144566e-209	-1.442	0.08	0.331	7.00437434959796e-205	M1	RNASE6
2.81682614813024e-208	-3.9094	0.007	0.191	6.63249884838747e-204	M1	ZBTB20
4.33586976257237e-208	-3.27014	0.012	0.202	1.02092389429529e-203	M1	STK17B
6.39524898366424e-208	-1.06953	0.132	0.416	1.50582532569358e-203	M1	LRRFIP1
7.43679192628177e-208	-1.93425	0.033	0.246	1.7510670269623e-203	M1	VPS13C
1.04397225049359e-207	-1.46148	0.063	0.303	2.45813706101221e-203	M1	TAOK3
3.05032197238294e-207	-3.20194	0.011	0.2	7.18228811617288e-203	M1	IER2
6.36281700924736e-207	-1.17428	0.093	0.356	1.49818889299738e-202	M1	JAK1
1.22806897538405e-206	-3.95255	0.008	0.192	2.89161120943929e-202	M1	GPAT3
1.91552308800017e-206	-1.8366	0.075	0.318	4.5102906630052e-202	M1	LRMDA
2.7202643272645e-206	-1.64849	0.039	0.258	6.405134384977e-202	M1	MGAT1
3.46942591035471e-206	-0.99989	0.17	0.473	8.1691102485212e-202	M1	CD99
3.77489582447345e-206	-1.34714	0.073	0.319	8.88836970830519e-202	M1	DHRS7
6.08114703588001e-206	-1.25904	0.071	0.317	1.43186688106831e-201	M1	SSR1
5.32616552436479e-204	0.475106	0.957	0.934	1.25409893436693e-199	M1	RPS21
1.90332593999445e-203	-1.35579	0.058	0.292	4.48157125831094e-199	M1	PRRC2C
2.82519768204255e-202	-1.9345	0.038	0.251	6.65221046213738e-198	M1	CTSD
1.14268501543495e-201	-1.86438	0.037	0.248	2.69056613734313e-197	M1	FMNL1
1.49349373629467e-201	-2.66699	0.018	0.209	3.51658035147944e-197	M1	TGFBR2
3.21826969818366e-201	-2.05539	0.029	0.232	7.57773783134323e-197	M1	N4BP2L2
1.17452519316956e-200	-2.32596	0.03	0.232	2.76553701983705e-196	M1	CRIP1
1.80136861395175e-200	-2.25292	0.023	0.22	4.24150253841079e-196	M1	POU2F2
2.72161146480115e-200	-0.926584	0.205	0.512	6.40830635502079e-196	M1	DDX5
2.61303727933972e-199	-1.71769	0.04	0.253	6.15265757793331e-195	M1	BSG
5.83384310930492e-199	-2.04277	0.038	0.247	1.37363669851694e-194	M1	TBC1D5
3.8681087833475e-198	-0.892853	0.216	0.53	9.10784894127003e-194	M1	RNF130
4.53790884024781e-198	-1.43865	0.061	0.291	1.06849601552475e-193	M1	IL13RA1
5.8511226036245e-198	-2.39525	0.025	0.221	1.37770532824942e-193	M1	CD44
1.62520521907254e-197	-1.27536	0.064	0.298	3.82670820882821e-193	M1	SCAMP2
1.94061280704344e-197	-1.97187	0.031	0.235	4.56936691546449e-193	M1	LMAN2
4.34439306256549e-197	-2.49301	0.021	0.214	1.02293079051167e-192	M1	TAPBP
8.45064831901138e-197	-1.45519	0.051	0.273	1.98978965319442e-192	M1	TMED10
9.61782928657438e-197	-3.10725	0.014	0.197	2.2646140838168e-192	M1	CHST11
1.57656038650606e-196	-2.643	0.023	0.215	3.71216908606718e-192	M1	SLC11A1
1.77620448435571e-196	-2.31159	0.025	0.22	4.18225107886395e-192	M1	JAK2
1.79825309672171e-196	-1.50806	0.044	0.259	4.23416674154095e-192	M1	M6PR
3.07919372349012e-196	-2.17824	0.029	0.227	7.25026954132984e-192	M1	CYTIP
8.18877250183452e-196	-1.57143	0.05	0.27	1.92812837328196e-191	M1	DPP7
1.31322493512837e-195	-2.50205	0.018	0.205	3.09211943225326e-191	M1	LMBRD1
1.53757383583644e-195	-3.23128	0.01	0.189	3.62037135386048e-191	M1	MPEG1
4.30857822177315e-195	-3.52629	0.009	0.186	1.01449782809871e-190	M1	UTRN
2.22291143982023e-194	-3.43712	0.007	0.182	5.23406727620071e-190	M1	GLG1
3.33470423524325e-194	-1.81038	0.06	0.281	7.85189459230375e-190	M1	MSR1
2.01166738868087e-192	-1.34032	0.061	0.289	4.73667203338799e-188	M1	TMEM50A
2.06757800413018e-192	-1.62595	0.041	0.251	4.86831916852493e-188	M1	SPINT2
2.22333842551059e-192	-1.958	0.03	0.227	5.23507265670723e-188	M1	MYCBP2
2.66562574042796e-192	-1.97968	0.029	0.226	6.27648236841168e-188	M1	NIPBL
8.26561555167875e-192	-1.54989	0.044	0.254	1.94622183779828e-187	M1	PTTG1IP
1.31346589581603e-191	-2.39799	0.017	0.2	3.09268679828843e-187	M1	KMT2C
4.38089957806656e-191	-1.43023	0.054	0.273	1.03152661465155e-186	M1	CCDC88A
8.12085064641659e-191	-0.910386	0.125	0.398	1.91213549320525e-186	M1	CD302
1.59152733228451e-190	0.651505	0.842	0.797	3.7474102565971e-186	M1	BTF3
1.89207419019956e-190	-2.0208	0.026	0.219	4.45507788824389e-186	M1	HEXB
2.15273689982126e-190	-2.04	0.03	0.226	5.06883430431913e-186	M1	PLD3
3.31690919695621e-190	-1.37795	0.055	0.275	7.8099943951531e-186	M1	IGFLR1
5.21496769094692e-190	-2.25907	0.023	0.211	1.22791629251036e-185	M1	NFKBIA
6.0880647433054e-190	-1.094	0.069	0.3	1.43349572445869e-185	M1	SRRM2
6.14568721018968e-190	-2.21063	0.03	0.225	1.44706351051126e-185	M1	DOCK10
1.1226472516399e-189	-3.37573	0.01	0.183	2.6433852187113e-185	M1	MAP3K8
1.5611091850082e-189	-1.44106	0.073	0.303	3.6757876870203e-185	M1	FOXN3
1.76159255081307e-189	-2.81407	0.016	0.196	4.14784582014447e-185	M1	ATP8B4
1.81427593813318e-189	-1.22859	0.078	0.314	4.27189412392839e-185	M1	DDX17
3.60638502354334e-189	0.629706	0.871	0.793	8.49159417643514e-185	M1	AIF1
5.23409648628174e-189	-2.08072	0.029	0.223	1.2324203586599e-184	M1	MCL1
5.27670695700135e-189	-2.1206	0.037	0.237	1.24245342009554e-184	M1	ELMO1
5.72773364264795e-189	-3.53417	0.008	0.179	1.34865216349789e-184	M1	BAZ2B
7.33886272166666e-189	-2.58069	0.02	0.204	1.72800861644363e-184	M1	FPR1
1.31300616310409e-188	-1.29436	0.061	0.284	3.09160431164488e-184	M1	SCAF11
1.87706469603138e-188	-2.62737	0.015	0.193	4.41973653327548e-184	M1	TNRC6B
2.46120704686365e-188	-2.28121	0.022	0.208	5.79515811254515e-184	M1	PIAS1
4.78497033794577e-188	-2.90692	0.014	0.191	1.12666911577271e-183	M1	LILRB2
5.90746558660537e-188	-2.69391	0.015	0.193	1.3909718470221e-183	M1	LYST
8.82582190792527e-188	-2.39744	0.048	0.252	2.07812802644008e-183	M1	C5AR1
3.15545576079786e-187	-1.53352	0.043	0.25	7.42983613437464e-183	M1	NR3C1
1.40287910847492e-186	-1.43399	0.049	0.26	3.30321914881505e-182	M1	SPCS2
1.70962927263205e-186	-3.86381	0.006	0.172	4.02549308533943e-182	M1	ITGAX
3.75212772584117e-186	-3.26801	0.009	0.179	8.83475994326561e-182	M1	MACF1
7.30593152359412e-186	-0.953529	0.214	0.508	1.72025463654547e-181	M1	ALOX5AP
6.51048337775833e-185	-1.34742	0.051	0.264	1.53295841612698e-180	M1	EIF5
2.52518140720564e-184	-2.50712	0.015	0.192	5.94579214140641e-180	M1	ADAM10
3.36178799865886e-184	-1.67342	0.048	0.255	7.91566602164216e-180	M1	LAMP1
6.09437055761616e-184	-3.25348	0.013	0.186	1.4349804914963e-179	M1	ITGA4
2.3428183859032e-183	-3.05574	0.009	0.176	5.51640017144768e-179	M1	TMEM165
2.89830523150386e-183	-1.61787	0.056	0.269	6.82434949809899e-179	M1	ATP1B3
7.02629874488786e-183	-1.93481	0.029	0.219	1.65441230247129e-178	M1	UVRAG
7.24509781667575e-183	-3.07464	0.013	0.185	1.70593073191447e-178	M1	LDLRAD4
7.67581745577114e-183	-3.71028	0.006	0.169	1.80734797813587e-178	M1	NOTCH2
2.29750414393095e-182	-1.32807	0.06	0.277	5.40970325729982e-178	M1	MFSD1
2.53258676194186e-182	-3.58342	0.007	0.171	5.9632287896683e-178	M1	DIAPH1
3.22229151379043e-182	-4.50732	0.003	0.163	7.58720759837094e-178	M1	TTC17
1.61411991609022e-181	0.545909	0.904	0.855	3.80060675442604e-177	M1	UBA52
4.19413581822172e-181	-1.12056	0.078	0.308	9.87551219758486e-177	M1	SYK
4.84644036953117e-181	-3.12864	0.012	0.181	1.14114284940981e-176	M1	ASH1L
7.52388331666144e-181	-2.48935	0.024	0.205	1.7715735657411e-176	M1	INSIG1
2.81444654741488e-179	-1.18576	0.119	0.37	6.62689584054308e-175	M1	MEF2A
4.32683667616278e-179	-2.51091	0.015	0.188	1.01879696376929e-174	M1	LRPAP1
1.71209788179205e-178	-1.11009	0.088	0.322	4.03130567246756e-174	M1	FUS
2.32997563487559e-177	-1.09706	0.089	0.324	5.48616062987806e-173	M1	RCSD1
2.84328352543493e-177	-1.65517	0.032	0.221	6.69479538898908e-173	M1	TMEM179B
5.87526573573411e-177	-1.53581	0.037	0.229	1.38339007013595e-172	M1	NCOR1
6.34378045388366e-177	-1.27933	0.059	0.272	1.49370654567145e-172	M1	ELF1
1.01996549068204e-175	-1.61036	0.034	0.222	2.40161074435993e-171	M1	RBM25
3.65988796682592e-175	-1.48105	0.117	0.36	8.61757220668831e-171	M1	HIST1H4C
3.96752098633066e-175	-2.84763	0.015	0.182	9.34192491441418e-171	M1	GPR183
6.61360086307729e-175	-2.91554	0.013	0.178	1.55723845922018e-170	M1	ARHGAP26
7.75380081099646e-175	-0.886586	0.249	0.541	1.82570993895723e-170	M1	CD68
1.71218737128585e-174	-1.47035	0.054	0.258	4.03151638442966e-170	M1	TSC22D3
1.79882168882293e-173	-1.70932	0.027	0.207	4.23550554850247e-169	M1	GNPTG
8.4093366641381e-173	-3.92896	0.014	0.176	1.98006241093796e-168	M1	CD52
1.43594315854417e-172	-4.27531	0.005	0.159	3.38107176110811e-168	M1	TRPS1
3.51623559996567e-172	-1.64875	0.036	0.223	8.27932834367917e-168	M1	SERINC1
4.10189786153604e-172	-1.34809	0.056	0.262	9.65832870477276e-168	M1	P4HB
4.78584770466547e-172	-1.6225	0.033	0.219	1.12687570054053e-167	M1	PPP1R12A
4.84514467460176e-172	-1.70179	0.034	0.221	1.14083776508173e-167	M1	RIN3
8.47921695865349e-172	-1.27732	0.151	0.397	1.99651642508455e-167	M1	A2M
1.01440768377116e-171	-0.949085	0.081	0.308	2.38852433220756e-167	M1	SEC62
1.43918171295857e-171	-0.832414	0.523	0.737	3.38869726133226e-167	M1	S100A4
1.57457266329942e-171	-2.23302	0.023	0.198	3.70748879300482e-167	M1	CYTH1
1.97416841390872e-171	-3.49248	0.007	0.163	4.64837694738947e-167	M1	MED13L
2.21399128132606e-171	-3.55762	0.007	0.164	5.21306387101033e-167	M1	PLEC
5.54968473520762e-171	-2.85747	0.013	0.177	1.30672876775199e-166	M1	CD47
7.74111552787312e-171	-3.28445	0.009	0.167	1.822723062193e-166	M1	SPIDR
1.0753417391865e-170	-1.63834	0.035	0.221	2.53199965908853e-166	M1	PLBD1
1.08299987527757e-170	-2.14339	0.023	0.197	2.55003150632857e-166	M1	CD163
1.27820341765638e-170	-2.86073	0.011	0.171	3.00965776721372e-166	M1	PECAM1
1.72876656395699e-170	-1.74337	0.024	0.199	4.07055375149314e-166	M1	MIS18BP1
2.85847426198871e-170	-1.30661	0.056	0.259	6.73056349727863e-166	M1	MBP
5.03626136967943e-170	-0.747002	0.255	0.554	1.18583810210472e-165	M1	SAMHD1
6.64987583533196e-170	-1.78133	0.027	0.205	1.56577976418726e-165	M1	LUC7L3
9.14446771711818e-170	-2.249	0.025	0.199	2.15315636867265e-165	M1	RUNX1
1.2217013502948e-169	0.612684	0.857	0.832	2.87661799940413e-165	M1	EEF2
1.63342914549873e-169	-2.08203	0.033	0.214	3.84607226599131e-165	M1	CLEC10A
1.6791300080868e-169	-1.09645	0.086	0.311	3.95367951704119e-165	M1	SF1
1.90685580770487e-169	-4.22456	0.004	0.155	4.4898826848219e-165	M1	TET2
1.9746111092258e-169	-1.6906	0.042	0.232	4.64941931778307e-165	M1	PLP2
2.94752190940262e-169	-2.34012	0.026	0.2	6.94023508787941e-165	M1	ARHGAP24
2.99033716017708e-169	-1.93467	0.039	0.225	7.04104787735295e-165	M1	FCHSD2
5.08272042165071e-169	-2.01244	0.026	0.202	1.19677735048188e-164	M1	FGD4
1.18348096672325e-168	-3.99869	0.005	0.155	2.78662428424657e-164	M1	DLEU2
1.53345714770502e-168	-1.69905	0.039	0.226	3.61067819998625e-164	M1	ENTPD1
2.63337106087313e-168	-4.2593	0.004	0.155	6.20053549993188e-164	M1	FTX
3.25737685664929e-168	-3.06881	0.008	0.164	7.66981954666642e-164	M1	RBM6
4.55912660665669e-168	-4.36065	0.014	0.172	1.07349195080338e-163	M1	FCER1A
8.32426561957111e-168	-1.31135	0.085	0.303	1.96003158278421e-163	M1	CX3CR1
1.28479014958722e-167	-1.54024	0.042	0.232	3.02516688621806e-163	M1	HEXA
3.86910595199828e-167	-2.51874	0.016	0.179	9.11019687457516e-163	M1	ARID4B
6.63773275644698e-167	-3.04989	0.009	0.165	1.56292055483301e-162	M1	AL034397.3
1.50994342446542e-166	-2.06156	0.019	0.185	3.55531278724627e-162	M1	TNFRSF1A
1.66713506356285e-166	-1.65577	0.025	0.198	3.92543622066508e-162	M1	TMED9
1.87117765849774e-166	-2.36656	0.016	0.179	4.40587491469877e-162	M1	CHD1
3.21594431196907e-166	-3.79386	0.008	0.161	7.57226247696238e-162	M1	IL2RG
3.38570671363287e-166	-2.62146	0.014	0.175	7.97198502791996e-162	M1	BIRC6
3.65883389226826e-166	-1.99703	0.026	0.198	8.61509028273485e-162	M1	ATP1A1
4.24937337011837e-166	-1.36356	0.042	0.231	1.00055745372807e-161	M1	TNFSF13
6.18304460911304e-166	-6.02136	0.001	0.144	1.45585968366176e-161	M1	SULF2
9.83722352731491e-166	0.528322	0.89	0.851	2.31627265174157e-161	M1	RPSA
1.07100419381029e-165	-3.57421	0.007	0.158	2.52178647474571e-161	M1	RGS2
1.49886564730472e-165	-1.72041	0.034	0.214	3.52922905314369e-161	M1	CAMK1D
1.88541331488331e-165	-2.7866	0.013	0.172	4.43939419122424e-161	M1	SLC3A2
2.40968773087216e-165	0.691357	0.815	0.776	5.67385073111158e-161	M1	RPL31
4.99139279448448e-165	-2.59839	0.014	0.174	1.17527334738932e-160	M1	CEP350
5.06636374656991e-165	-0.957521	0.158	0.415	1.19292600776735e-160	M1	TAGLN2
9.24504007482727e-165	-1.2026	0.05	0.247	2.17683713601883e-160	M1	AUP1
1.89923599428815e-164	-1.51699	0.043	0.231	4.47194107215087e-160	M1	CD81
1.94392932395525e-164	-2.50255	0.016	0.178	4.57717598618503e-160	M1	ADAM28
2.02214090441235e-164	-1.78632	0.029	0.205	4.76133297352932e-160	M1	ERP44
4.2152626166426e-164	-2.01167	0.021	0.187	9.92525735714668e-160	M1	MLEC
4.36757423048834e-164	-1.09601	0.064	0.271	1.02838902831078e-159	M1	GRINA
7.63222296477012e-164	-1.48772	0.042	0.229	1.79708321928477e-159	M1	PRCP
9.47589602217502e-164	-3.19848	0.01	0.164	2.23119447738133e-159	M1	DISC1
1.00454042817684e-163	-0.773846	0.128	0.381	2.3652908921852e-159	M1	KRTCAP2
1.44076404224774e-163	-0.82582	0.184	0.457	3.39242301387652e-159	M1	LCP1
2.11944126978392e-163	-2.1291	0.02	0.186	4.99043641383322e-159	M1	ANKRD11
2.32252388375654e-163	-3.39087	0.006	0.155	5.46861473669315e-159	M1	PKN2
2.53285993559534e-163	-1.04303	0.058	0.26	5.96387200435278e-159	M1	UBXN4
6.16495941211358e-163	-1.28136	0.044	0.233	1.45160134317626e-158	M1	LAT2
8.9448163520988e-163	-2.38329	0.025	0.194	2.10614645826518e-158	M1	CTSL
6.38506610292277e-162	-2.89838	0.018	0.177	1.5034276645942e-157	M1	HIST1H1E
7.17581478737604e-162	-2.88428	0.009	0.16	1.68961734983556e-157	M1	TCIRG1
8.48658725236722e-162	-1.04187	0.121	0.358	1.99825183444239e-157	M1	ASAH1
1.03665924843851e-161	-2.39465	0.015	0.173	2.44091786637332e-157	M1	ELF2
1.52225090185127e-161	-1.43897	0.044	0.23	3.58429197349901e-157	M1	ATRX
2.2814839575794e-161	-3.07673	0.01	0.162	5.37198212651644e-157	M1	RAPGEF1
3.29083263006102e-161	-2.33284	0.016	0.175	7.74859451074168e-157	M1	ASAP1
4.15702568393945e-161	-0.666738	0.458	0.707	9.78813267540382e-157	M1	VIM
7.61008220021872e-161	-3.15082	0.011	0.163	1.7918699548635e-156	M1	MAML3
8.75438719166645e-161	-3.06834	0.01	0.161	2.06130800814978e-156	M1	B4GALT1
4.15703797661678e-160	-2.37219	0.022	0.187	9.78816161974187e-156	M1	SELPLG
4.53182095954164e-160	-1.0163	0.113	0.345	1.06706256313367e-155	M1	MYH9
5.63258421228722e-160	-3.43285	0.008	0.155	1.32624827862515e-155	M1	IQGAP2
6.37289589010067e-160	-2.37151	0.016	0.174	1.5005620662831e-155	M1	SCPEP1
6.70586469750966e-160	-2.97802	0.009	0.158	1.57896290167562e-155	M1	CD58
1.20489284490053e-159	-1.21013	0.058	0.255	2.83704069260279e-155	M1	ITSN2
1.62693818172047e-159	-1.34158	0.051	0.241	3.83078864267903e-155	M1	LGALS3
1.69402790372574e-159	-2.06855	0.025	0.191	3.98875810211263e-155	M1	CCNH
3.7678008553523e-159	-3.28617	0.007	0.154	8.87166389401252e-155	M1	SLC38A2
5.1360099648552e-159	-1.95299	0.02	0.181	1.2093249063248e-154	M1	FGR
8.14312102173522e-159	-1.10697	0.061	0.26	1.91737927577778e-154	M1	DDOST
2.09027561769681e-158	-4.56504	0.004	0.145	4.9217629694289e-154	M1	PDE4B
5.49568229468081e-158	-4.56644	0.003	0.144	1.29401335310554e-153	M1	CCNL1
7.5019866164427e-158	-3.48439	0.007	0.152	1.7664177687076e-153	M1	RRBP1
8.82588252693989e-158	-3.47568	0.008	0.155	2.07814229979327e-153	M1	RTN1
1.08668783506207e-157	-3.37608	0.006	0.15	2.55871517643716e-153	M1	IER3
1.46693159824216e-157	-2.88032	0.009	0.157	3.45403714122099e-153	M1	NIN
1.74478053217405e-157	-3.02769	0.008	0.155	4.10826024105701e-153	M1	CELF1
2.03936713782399e-157	0.601458	0.835	0.797	4.80189386272036e-153	M1	PFDN5
5.83781917073308e-157	-1.23218	0.042	0.223	1.37457290194081e-152	M1	CMTM7
5.8695197614526e-157	-1.59309	0.036	0.211	1.38203712303163e-152	M1	NUCB1
8.16004157163111e-157	-0.893454	0.116	0.351	1.92136338845626e-152	M1	LIMD2
1.22172254757176e-156	-1.2542	0.054	0.244	2.87666791051247e-152	M1	NDFIP1
1.33339339321872e-156	-1.16753	0.067	0.268	3.1396080836728e-152	M1	OSBPL8
1.69078512743548e-156	-0.824472	0.122	0.363	3.98112266105958e-152	M1	MAN2B1
2.72341935157584e-156	-4.60851	0.004	0.144	6.41256320522047e-152	M1	CXCR4
4.47919251028571e-156	-1.21056	0.058	0.252	1.05467066847187e-151	M1	SRSF11
6.41631007125745e-156	-2.41994	0.015	0.169	1.51078436937828e-151	M1	CCDC47
1.53536089005125e-155	-3.83272	0.007	0.15	3.61516075171468e-151	M1	SELL
1.56664713253903e-155	-2.27299	0.014	0.166	3.6888273382764e-151	M1	NPTN
2.06811009832889e-155	-1.30959	0.089	0.298	4.8695720375252e-151	M1	EZR
2.14079265257365e-155	-1.25136	0.051	0.239	5.0407103797499e-151	M1	TMEM123
2.54498089187832e-155	-1.1054	0.105	0.327	5.9924120080167e-151	M1	VSIG4
3.55253164571581e-155	-2.06558	0.021	0.179	8.36479101300245e-151	M1	USP34
4.40499390525239e-155	-1.4517	0.061	0.253	1.03719986493073e-150	M1	C3AR1
4.95187588173607e-155	-2.5262	0.016	0.17	1.16596869511357e-150	M1	PRKCB
7.56612028643985e-155	-2.30784	0.013	0.163	1.78151868264513e-150	M1	SPTLC2
1.11407695412381e-154	-1.16197	0.056	0.249	2.62320559617993e-150	M1	SELENOF
4.78799208001538e-154	-2.32676	0.014	0.166	1.12738061516042e-149	M1	SERINC3
6.3642467313532e-154	-2.3975	0.014	0.165	1.49852553536442e-149	M1	PHIP
9.78607619760688e-154	-1.36307	0.035	0.208	2.30422950148852e-149	M1	PRKDC
1.54759291971674e-153	-2.84765	0.011	0.157	3.64396228876504e-149	M1	GLB1
2.12331576976326e-153	-1.25615	0.051	0.236	4.99955931148456e-149	M1	DOCK2
5.1325951555384e-153	-1.33043	0.04	0.217	1.20852085532307e-148	M1	TPR
5.38583893462947e-153	-1.80516	0.034	0.204	1.26814963554785e-148	M1	IKZF1
6.25784176715171e-153	-2.65093	0.011	0.158	1.47347142249354e-148	M1	LBR
1.4563708186618e-152	-1.90545	0.022	0.18	3.42917072962108e-148	M1	DSE
2.15776956182405e-152	-2.58082	0.019	0.172	5.08068421027091e-148	M1	SLC9A9
2.3393306320321e-152	-2.22784	0.016	0.169	5.50818790618278e-148	M1	RPS6KA3
5.97501702507381e-152	-0.959618	0.111	0.335	1.40687750872388e-147	M1	PICALM
1.29691733620235e-151	-1.61078	0.034	0.204	3.05372155982206e-147	M1	ATM
4.91307506882046e-151	-2.15452	0.018	0.17	1.15683265570447e-146	M1	SPCS3
6.63794786058281e-151	-2.26843	0.051	0.226	1.56297120325283e-146	M1	FCGBP
1.49747658394033e-150	-2.46343	0.013	0.16	3.5259583645459e-146	M1	TIMP2
1.71768358710034e-150	-4.26984	0.004	0.138	4.04445777418647e-146	M1	ZSWIM6
2.38868596407817e-150	-2.03357	0.017	0.168	5.62439997101846e-146	M1	LRRC25
2.58440718373063e-150	-2.16162	0.013	0.159	6.08524515481215e-146	M1	PTAFR
3.85611112389636e-150	-1.53809	0.029	0.193	9.07959925232636e-146	M1	DYNC1H1
6.59179590840868e-150	-2.13736	0.018	0.17	1.55210426459391e-145	M1	USP3
1.03142379180063e-149	-0.70247	0.291	0.564	2.42859046017376e-145	M1	LSP1
1.46726518436236e-149	-4.7256	0.003	0.137	3.45482260309962e-145	M1	FYN
1.78978006930476e-149	-2.72237	0.011	0.155	4.21421615118498e-145	M1	SPPL2A
2.10369101986817e-149	-0.614594	0.598	0.789	4.9533508753816e-145	M1	FCER1G
2.79090711101073e-149	-2.45994	0.016	0.165	6.57146988358587e-145	M1	ITPR2
3.07150332854032e-149	-1.30509	0.048	0.227	7.23216173738104e-145	M1	QKI
4.05903464285024e-149	-3.55263	0.006	0.144	9.55740297005519e-145	M1	PIK3R5
4.21080732639378e-149	-0.887208	0.11	0.334	9.91476693072679e-145	M1	IGSF6
1.1406641517088e-148	-3.36313	0.007	0.145	2.68580781161355e-144	M1	SUMF1
2.93369597074766e-148	-1.53611	0.037	0.205	6.90768053272244e-144	M1	VMP1
2.94871048012688e-148	-1.9412	0.024	0.18	6.94303369650676e-144	M1	RBM47
3.27798989327737e-148	-2.45694	0.01	0.151	7.7183550027109e-144	M1	SELENOS
1.1295415774583e-147	-1.68685	0.025	0.182	2.65961859828331e-143	M1	MPHOSPH8
1.5868165121386e-147	-2.20703	0.018	0.168	3.73631815948156e-143	M1	ADAM15
2.29135482915911e-147	-0.802286	0.138	0.377	5.39522408073804e-143	M1	TGFBI
5.10890073872798e-147	-2.095	0.02	0.171	1.20294176794089e-142	M1	ANKHD1
6.09225129093136e-147	-2.0377	0.021	0.174	1.4344814889627e-142	M1	TMEM109
7.77144558363984e-147	-0.902188	0.068	0.262	1.82986457712384e-142	M1	NFE2L2
9.90736667530552e-147	-2.10117	0.024	0.178	2.33278855736744e-142	M1	ST6GAL1
1.18753281101367e-146	-2.04466	0.019	0.17	2.79616475681278e-142	M1	FADS1
1.66581660043105e-146	-0.948776	0.087	0.294	3.92233176737494e-142	M1	SRSF7
2.48589082231936e-146	-1.24704	0.038	0.208	5.85327853023317e-142	M1	MYDGF
4.82783202669681e-146	0.698113	0.827	0.797	1.13676132900603e-141	M1	RPS26
7.46653253311199e-146	-5.32973	0.004	0.135	1.75806975024655e-141	M1	CD1C
9.988868015636e-146	-2.20511	0.015	0.161	2.35197886296165e-141	M1	CLEC12A
1.26298662405765e-145	-0.907669	0.097	0.309	2.97382830500613e-141	M1	SH3KBP1
1.40991209378335e-145	-2.58159	0.01	0.149	3.31977901602228e-141	M1	FNBP4
1.49071374751635e-145	-2.86627	0.01	0.148	3.510034589902e-141	M1	HERC1
1.69913578849448e-145	-1.8144	0.029	0.187	4.00078512758911e-141	M1	TBC1D22A
2.26901520190665e-145	-3.1848	0.007	0.143	5.34262319440941e-141	M1	HGSNAT
3.46850342132222e-145	-3.49083	0.006	0.14	8.1669381558453e-141	M1	CFP
6.63065343185288e-145	-1.25489	0.038	0.206	1.56125365706408e-140	M1	BRD2
7.02852649616713e-145	-3.65728	0.006	0.139	1.65493684878751e-140	M1	KANSL1
8.18157699452867e-145	-1.56739	0.028	0.185	1.92643411913172e-140	M1	CHD9
8.31986666149929e-145	-1.44728	0.097	0.296	1.95899580411662e-140	M1	C3
1.43052503103061e-144	-3.2422	0.007	0.142	3.36831423806467e-140	M1	EIF4G3
1.60593938465911e-144	-0.638661	0.101	0.319	3.78134487511834e-140	M1	SRRM1
2.09004726615396e-144	-1.48799	0.03	0.19	4.92122529288611e-140	M1	ZFHX3
2.37823801999301e-144	-2.22283	0.018	0.165	5.59979924187554e-140	M1	DIAPH2
3.11234094821586e-144	-0.635457	0.149	0.392	7.32831799666907e-140	M1	CAST
3.263428804366e-144	-3.47766	0.004	0.136	7.68406946276017e-140	M1	NBPF14
3.85239499100727e-144	-3.6774	0.005	0.137	9.07084924582572e-140	M1	ADGRE5
4.55588159461721e-144	-0.960226	0.068	0.259	1.07272788026857e-139	M1	ROCK1
4.86775260744791e-144	-1.34426	0.032	0.193	1.14616102894968e-139	M1	NME3
5.47736369557554e-144	-2.39349	0.016	0.161	1.28970005576022e-139	M1	MAML2
5.65766771919778e-144	-1.75427	0.027	0.184	1.33215444116231e-139	M1	CMIP
6.9552898477627e-144	-1.44438	0.032	0.193	1.63769254755421e-139	M1	TACC1
7.53075912779972e-144	-1.76395	0.025	0.179	1.77319254423172e-139	M1	XBP1
9.07437502146122e-144	-1.61038	0.025	0.18	2.13665234255326e-139	M1	CFLAR
1.49049843807587e-143	-7.55024	0.001	0.127	3.50952762229344e-139	M1	VCAN
2.16777928766113e-143	-2.65746	0.011	0.15	5.10425311072689e-139	M1	DNAJC3
2.67375527635853e-143	-3.54164	0.011	0.148	6.2956241737138e-139	M1	CD83
3.00279280996029e-143	-2.73227	0.009	0.145	7.0703759503325e-139	M1	ITFG1
3.4595848916877e-143	-1.63331	0.026	0.182	8.14593858596785e-139	M1	DOK2
3.73658643096896e-143	-1.30721	0.044	0.215	8.7981664103595e-139	M1	FLI1
4.21894372544894e-143	-4.77606	0.002	0.13	9.93392489594207e-139	M1	MS4A4E
5.16692118009637e-143	-1.97701	0.034	0.194	1.21660326106549e-138	M1	RABGAP1L
7.04029612741866e-143	-2.87193	0.012	0.151	1.657708126162e-138	M1	ALCAM
1.81175878517797e-142	-2.52373	0.013	0.152	4.26596723558004e-138	M1	MCTP1
2.20170219943067e-142	-1.98326	0.018	0.163	5.18412799877946e-138	M1	BPTF
2.30343946313451e-142	-0.997474	0.058	0.241	5.42367855989652e-138	M1	PRPF40A
2.99208612509716e-142	-3.76482	0.005	0.136	7.04516599015378e-138	M1	PAN3
4.74744350827529e-142	-2.78013	0.01	0.146	1.1178330484585e-137	M1	SMG1
7.73757006978282e-142	-0.909051	0.072	0.265	1.82188824863106e-137	M1	THRAP3
9.55840405868597e-142	-1.36751	0.033	0.194	2.2506218196582e-137	M1	SENP6
1.70161916143742e-141	-0.944022	0.129	0.353	4.00663247752056e-137	M1	LPP
1.77559678190638e-141	-0.806565	0.096	0.306	4.18082018267676e-137	M1	KHDRBS1
1.78592481702757e-141	-3.91728	0.004	0.132	4.20513857417311e-137	M1	VCL
1.85681624672859e-141	-2.017	0.018	0.162	4.37205953454714e-137	M1	ZNF638
1.91169869669941e-141	-2.6907	0.013	0.151	4.50128575124844e-137	M1	DENND1A
3.2435188647555e-141	-3.55567	0.007	0.139	7.6371895189533e-137	M1	APP
3.81910797716559e-141	-2.03796	0.018	0.163	8.99247164303409e-137	M1	UNC93B1
4.79747985938242e-141	-0.697268	0.181	0.434	1.12961460769019e-136	M1	ANXA1
5.88891502195419e-141	-0.69985	0.116	0.339	1.38660393106933e-136	M1	DAD1
6.08881425711702e-141	-2.12802	0.015	0.157	1.43367220498077e-136	M1	MESD
6.50535872669945e-141	-2.84345	0.01	0.146	1.53175176578865e-136	M1	SUN2
6.71778441588745e-141	-1.7966	0.036	0.197	1.58176951856486e-136	M1	NAPSA
7.09003577964026e-141	-2.15799	0.019	0.164	1.6694198246741e-136	M1	TMED5
8.19318530003587e-141	-1.61542	0.07	0.252	1.92916741074645e-136	M1	FCGR3A
1.63336593520106e-140	-0.80537	0.055	0.234	3.84592343102441e-136	M1	PLEKHO1
3.78001760544058e-140	-1.28715	0.038	0.202	8.9004294537704e-136	M1	SDCCAG8
4.1552967494789e-140	-1.1262	0.098	0.301	9.78406172632301e-136	M1	RASGEF1B
1.30090082845924e-139	-3.88172	0.005	0.133	3.06310109069012e-135	M1	ZNF292
1.56542753152911e-139	-3.6028	0.005	0.132	3.68595566573844e-135	M1	DST
1.75030697579329e-139	0.6308	0.791	0.753	4.12127280520287e-135	M1	RPS11
2.58311143849296e-139	-2.22308	0.014	0.153	6.08219419307553e-135	M1	CCDC18-AS1
5.05030878858452e-139	-2.36558	0.015	0.154	1.18914570736011e-134	M1	NCOA3
5.82040033151629e-139	-0.848416	0.079	0.275	1.37047146205883e-134	M1	HP1BP3
7.12110630548761e-139	-1.23069	0.053	0.228	1.67673569069011e-134	M1	MS4A4A
1.00996913706092e-138	-1.7444	0.022	0.17	2.37807333012365e-134	M1	SDF4
1.48088652285973e-138	-3.5038	0.006	0.134	3.48689540672552e-134	M1	SLC43A2
1.64134368455799e-138	-3.60204	0.005	0.131	3.86470783966025e-134	M1	MBOAT7
1.78372366420123e-138	-0.88189	0.071	0.261	4.19995573972821e-134	M1	ALOX5
2.07055825118717e-138	-1.65363	0.026	0.177	4.87533645824531e-134	M1	NUMB
2.8874793499632e-138	-2.17665	0.016	0.155	6.79885887742334e-134	M1	RERE
3.47668382806743e-138	-1.66865	0.032	0.188	8.18619974156757e-134	M1	STK10
4.86812080879275e-138	-2.54391	0.013	0.15	1.14624772563834e-133	M1	GAB2
5.96368062772662e-138	-0.756993	0.113	0.33	1.40420824060451e-133	M1	CLEC7A
6.34197626525907e-138	-2.3154	0.011	0.144	1.4932817314179e-133	M1	CYBC1
7.35597641886914e-138	-1.36698	0.069	0.252	1.73203820758693e-133	M1	HDAC9
4.24758930634377e-137	-1.48548	0.03	0.183	1.0001373780717e-132	M1	PRPF38B
4.34806791724162e-137	-0.699553	0.171	0.411	1.02379607179371e-132	M1	ANXA2
1.07931974860332e-136	-0.785344	0.216	0.463	2.54136628006139e-132	M1	ZFP36L1
1.52882900888201e-136	-1.06432	0.049	0.22	3.59978078431358e-132	M1	RTN3
1.70591073241914e-136	-1.52442	0.031	0.184	4.0167374105541e-132	M1	GLIPR2
1.82970152483402e-136	-1.89049	0.027	0.176	4.30821521037419e-132	M1	CYP51A1
2.93928839002484e-136	-3.90622	0.004	0.127	6.9208484431525e-132	M1	EMILIN2
3.96734694717941e-136	-3.17477	0.008	0.137	9.34151512182864e-132	M1	FBXO11
4.12431897357275e-136	-1.36926	0.033	0.189	9.71112145517439e-132	M1	CACUL1
4.70290740185478e-136	-3.43919	0.006	0.132	1.10734657684073e-131	M1	ARID1B
1.27603385249135e-135	-3.41157	0.007	0.134	3.00454930907614e-131	M1	SGK1
8.69176897389829e-135	-0.729293	0.107	0.319	2.04656392259409e-130	M1	TGFB1
9.95211692600003e-135	-3.56752	0.005	0.128	2.34332545139597e-130	M1	NCOA1
1.04965941234607e-134	-4.02939	0.006	0.132	2.47152805231006e-130	M1	AFF3
1.16938206010124e-134	0.773459	0.7	0.666	2.75342699871439e-130	M1	SNHG29
1.76092860671771e-134	-1.88893	0.027	0.175	4.14628249737752e-130	M1	TRAF3IP3
5.8114046068981e-134	-1.80058	0.018	0.158	1.36835332874023e-129	M1	TMCO1
7.49118172991648e-134	-2.08724	0.016	0.153	1.76387365012613e-129	M1	MAP3K1
7.85916520962122e-134	-2.34153	0.009	0.137	1.85051904025741e-129	M1	BOD1L1
8.36305344044113e-134	-3.26499	0.006	0.131	1.96916456308627e-129	M1	RC3H1
8.3823376916186e-134	-2.70827	0.009	0.137	1.97370523286851e-129	M1	CCPG1
9.70451031900035e-134	-0.751592	0.072	0.259	2.28502399971182e-129	M1	DDX24
1.14824210894168e-133	-0.72002	0.082	0.277	2.70365086971408e-129	M1	EIF3A
1.26246057152168e-133	-1.29577	0.04	0.199	2.97258966170494e-129	M1	BCLAF1
1.41061351511949e-133	-3.37077	0.006	0.13	3.32143058270035e-129	M1	GNS
1.50223843234846e-133	-0.86534	0.15	0.377	3.53717061280769e-129	M1	PPDPF
1.54505497821966e-133	-2.18885	0.015	0.15	3.63798645171602e-129	M1	STK38
1.78303350029436e-133	-2.97585	0.006	0.13	4.1983306797931e-129	M1	LNPEP
2.0151923698207e-133	-1.73441	0.025	0.171	4.74497195397982e-129	M1	HLA-F
2.8207268664851e-133	-1.95338	0.017	0.155	6.64168347982581e-129	M1	GUSB
3.02215364813181e-133	-6.0443	0.003	0.123	7.11596297989115e-129	M1	FCN1
3.17106337641829e-133	-1.26128	0.039	0.198	7.4665858261145e-129	M1	ARHGAP30
5.19011414795511e-133	-2.63792	0.008	0.134	1.22206427727751e-128	M1	ICAM2
6.97209043541605e-133	-1.54468	0.029	0.177	1.64164841392306e-128	M1	RSF1
7.3784650895983e-133	-2.30158	0.017	0.154	1.73733338999682e-128	M1	COP1
7.6211311922236e-133	-2.21187	0.018	0.156	1.79447155052097e-128	M1	PPP3CA
1.88125414895325e-132	-2.45254	0.011	0.141	4.42960101912531e-128	M1	CHD2
2.1458587551513e-132	-0.992792	0.054	0.225	5.05263902487925e-128	M1	SFT2D1
2.1664598488391e-132	-2.78331	0.011	0.14	5.10114636007655e-128	M1	ATG7
3.8783493933322e-132	-1.89131	0.028	0.174	9.13196148154e-128	M1	SRGAP2
4.50617562268314e-132	-1.38025	0.06	0.231	1.06102411211697e-127	M1	LY6E
4.51807408993729e-132	-3.0372	0.007	0.132	1.06382572521663e-127	M1	TMEM154
4.83594193052575e-132	-3.94186	0.007	0.13	1.13867088696159e-127	M1	RIPOR2
4.9660363523649e-132	-1.70822	0.025	0.169	1.16930291952784e-127	M1	SMARCA2
6.31774399044973e-132	0.541585	0.84	0.821	1.48757599999129e-127	M1	YBX1
1.0078521389137e-131	-1.7048	0.038	0.193	2.37308864628619e-127	M1	TCF4
1.12116471386164e-131	-1.72218	0.019	0.157	2.63989443525863e-127	M1	NEMF
1.18082330088932e-131	-3.8391	0.004	0.125	2.780366544274e-127	M1	SLC2A3
1.73053740800236e-131	-1.7316	0.018	0.156	4.07472338088237e-127	M1	YIF1B
2.14820962466866e-131	-0.675536	0.106	0.314	5.05817438224482e-127	M1	SP100
2.74679596840028e-131	-3.55442	0.005	0.126	6.46760578719529e-127	M1	PSEN1
2.81731088032764e-131	-5.01117	0.001	0.118	6.63364019881947e-127	M1	AC004687.1
2.88111164401353e-131	-2.00626	0.019	0.156	6.78386547699425e-127	M1	AGTRAP
2.93859963383078e-131	-1.16303	0.041	0.2	6.91922669781794e-127	M1	WNK1
3.12970412449636e-131	-3.31517	0.007	0.13	7.36920133153912e-127	M1	ICAM3
3.85957592558987e-131	-2.93464	0.009	0.135	9.0877574743939e-127	M1	LRRK2
7.47852673547985e-131	-2.02351	0.016	0.15	1.76089390513609e-126	M1	IRAK3
7.50246768947478e-131	-0.885047	0.074	0.258	1.76653104216373e-126	M1	SF3B1
1.07762732582699e-130	-1.00321	0.046	0.209	2.53738130139223e-126	M1	PPIG
1.09617373332824e-130	-2.05652	0.034	0.184	2.58105067249467e-126	M1	DOCK4
1.31656477927593e-130	-1.63636	0.044	0.203	3.0999834292831e-126	M1	FNDC3A
2.78755048673043e-130	-1.79432	0.023	0.164	6.56356637605547e-126	M1	LMAN1
3.86240333255189e-130	0.618118	0.747	0.696	9.09441488682668e-126	M1	TUBA1B
6.42868436618701e-130	-2.31663	0.018	0.152	1.51369802086239e-125	M1	RESF1
9.51418855410366e-130	-1.56994	0.026	0.17	2.24021083694925e-125	M1	SRPRA
1.45936457691834e-129	-1.42048	0.034	0.184	3.43621983281193e-125	M1	SETX
1.55320651138331e-129	-1.05036	0.06	0.232	3.65718005170314e-125	M1	TECR
1.75971971189182e-129	-3.452	0.005	0.125	4.14343603362049e-125	M1	KDM2A
2.57544986075256e-129	-1.82078	0.025	0.167	6.06415424212797e-125	M1	TMX1
2.69833366127978e-129	-2.38954	0.015	0.146	6.35349643884938e-125	M1	LAMP2
2.77173175933968e-129	-3.13273	0.006	0.127	6.5263196005412e-125	M1	ADPGK
3.69836329688444e-129	-1.38183	0.042	0.198	8.70816621884411e-125	M1	ZFAND3
5.38015156872505e-129	-2.4677	0.01	0.136	1.266810488372e-124	M1	SLC39A10
6.57141608860397e-129	-2.50314	0.011	0.138	1.54730563222269e-124	M1	SREBF2
1.04186846382329e-128	-0.910108	0.071	0.252	2.45318348491833e-124	M1	PRMT2
1.20556767444746e-128	-2.04312	0.016	0.147	2.838629646254e-124	M1	CD84
2.2260038356018e-128	-3.61714	0.004	0.121	5.24134863130799e-124	M1	NLRP1
4.45540012847807e-128	-2.87391	0.011	0.137	1.04906851425145e-123	M1	NCOA2
5.03468786316669e-128	-1.61311	0.025	0.165	1.18546760426123e-123	M1	MYO9B
8.49547786072162e-128	-3.93068	0.004	0.121	2.00034521708551e-123	M1	SPN
2.07388567287972e-127	-1.95076	0.023	0.16	4.8831712053626e-123	M1	NIBAN1
2.34286183400361e-127	-2.48449	0.011	0.136	5.5165024743449e-123	M1	FRYL
3.68594644074162e-127	-1.81891	0.02	0.156	8.67892948937022e-123	M1	FOXN2
3.79255851135929e-127	-1.07079	0.058	0.226	8.92995827084659e-123	M1	FNBP1
4.74786652221036e-127	-2.38022	0.014	0.141	1.11793265131965e-122	M1	ANKRD17
7.6505034336468e-127	-1.39185	0.026	0.168	1.80138753848648e-122	M1	TBRG1
9.19342546067717e-127	-1.02707	0.072	0.25	2.16468395897105e-122	M1	WIPF1
9.66836420588746e-127	-0.742437	0.066	0.242	2.27651303591826e-122	M1	ZNF106
1.05576686645433e-126	-2.49348	0.007	0.127	2.48590866375337e-122	M1	OSCAR
1.10423164598533e-126	-2.16987	0.018	0.149	2.60002383363705e-122	M1	ZC3HAV1
1.53092283953289e-126	-2.31297	0.01	0.133	3.60471091796414e-122	M1	ARID1A
2.64445018009623e-126	-2.82505	0.006	0.125	6.22662239405458e-122	M1	NRROS
2.69320149117113e-126	-1.13348	0.034	0.183	6.34141223111154e-122	M1	CNPPD1
3.18394375749801e-126	-1.17557	0.038	0.189	7.49691397140482e-122	M1	TRA2B
3.50251461048758e-126	-1.7888	0.019	0.153	8.24702090185407e-122	M1	KDM5A
3.61066165835694e-126	-2.05947	0.02	0.153	8.50166394076726e-122	M1	STAG1
7.03309336842473e-126	-2.10326	0.013	0.139	1.65601216452929e-121	M1	IL10RB
9.31229659282622e-126	-0.865013	0.076	0.255	2.19267335574686e-121	M1	ETS2
1.2568074444365e-125	-2.27584	0.014	0.142	2.95927880867019e-121	M1	NSD1
1.50895957689597e-125	-2.458	0.01	0.132	3.55299621975924e-121	M1	SEC63
2.46985536537667e-125	-2.15126	0.012	0.137	5.81552144331591e-121	M1	EEA1
4.1563420040864e-125	-0.970255	0.047	0.206	9.78652288282183e-121	M1	DDX46
4.67697251606501e-125	-1.01415	0.045	0.202	1.10123994863267e-120	M1	SLTM
4.89341024809371e-125	-1.51845	0.023	0.16	1.15220237701614e-120	M1	ERICH1
5.40632093002173e-125	-0.644785	0.174	0.408	1.27297232618292e-120	M1	LYN
5.78300497750085e-125	-2.19934	0.015	0.143	1.36166635200235e-120	M1	PUM2
6.60356293499586e-125	-1.00503	0.046	0.203	1.55487492867413e-120	M1	STAG2
7.10485453353943e-125	-1.54603	0.035	0.181	1.6729090484672e-120	M1	KYNU
8.19255774075903e-125	0.468924	0.889	0.88	1.92901964563912e-120	M1	PABPC1
1.02941860757442e-124	-3.15944	0.007	0.126	2.42386905339474e-120	M1	ST8SIA4
1.05252614869263e-124	-1.29385	0.031	0.176	2.47827806971167e-120	M1	CYTH4
1.13209384970941e-124	-4.0401	0.003	0.116	2.66562817852577e-120	M1	ADCY7
1.15357534592939e-124	-2.18878	0.011	0.135	2.71620850952533e-120	M1	EMC7
1.40594342011902e-124	-0.710787	0.088	0.277	3.31043437701224e-120	M1	PAK1
1.47754655348255e-124	-2.33588	0.012	0.136	3.47903111483e-120	M1	LPGAT1
2.49069236692187e-124	-1.99314	0.017	0.146	5.86458424715425e-120	M1	LRP10
3.09109850439192e-124	-1.76308	0.017	0.147	7.27830053844122e-120	M1	GOLGA4
4.11641675263659e-124	-2.08537	0.018	0.148	9.69251488575812e-120	M1	EXOC4
5.34667885058246e-124	-1.70825	0.026	0.163	1.25892900215815e-119	M1	CPQ
6.4662009325366e-124	-3.70722	0.004	0.118	1.52253167157507e-119	M1	ESYT1
1.26355563432273e-123	-3.01019	0.008	0.127	2.97516809657629e-119	M1	NKTR
1.67840278922481e-123	-0.92914	0.06	0.227	3.95196720750874e-119	M1	INPP5D
2.06678840226778e-123	-0.814716	0.073	0.251	4.86645997197972e-119	M1	CSNK1A1
3.1891107563692e-123	-2.04754	0.015	0.141	7.50908018694692e-119	M1	SH2B3
3.22994634526483e-123	-2.19823	0.014	0.14	7.60523166456057e-119	M1	SMC1A
5.07348706724828e-123	-1.85377	0.02	0.152	1.19460326485428e-118	M1	GCC2
6.17209252990488e-123	-1.52338	0.024	0.16	1.4532809070914e-118	M1	ACIN1
6.78850980180615e-123	-1.91024	0.018	0.146	1.59842251793328e-118	M1	DEGS1
6.86072926481563e-123	-0.947693	0.076	0.252	1.61542731269349e-118	M1	UBE2E2
7.47476071953795e-123	-0.990515	0.05	0.208	1.76000715902241e-118	M1	FBXL5
8.24496825131274e-123	-4.40889	0.002	0.114	1.9413602244541e-118	M1	PDE3B
8.56536741872285e-123	-1.43026	0.031	0.174	2.01680141241248e-118	M1	VOPP1
9.19462709177578e-123	-5.05191	0.002	0.112	2.16496689502953e-118	M1	NR4A2
9.4118903297682e-123	-3.8277	0.004	0.116	2.21612369704722e-118	M1	DDIT4
1.33312810739248e-122	-2.31991	0.012	0.135	3.13898344166632e-118	M1	CD300C
1.61961350782119e-122	-0.550057	0.269	0.538	3.81354196551577e-118	M1	ATP6V0C
2.06726656537054e-122	-2.49476	0.012	0.134	4.86758585482147e-118	M1	ATXN1
2.34337571345949e-122	-0.796804	0.067	0.239	5.51771245491171e-118	M1	OCIAD1
2.35233526979627e-122	-0.872981	0.124	0.325	5.53880862626231e-118	M1	NCF1
3.16058664812735e-122	-2.1004	0.013	0.136	7.44191732168066e-118	M1	SFT2D2
3.28118274189002e-122	-1.21753	0.039	0.188	7.72587288405425e-118	M1	SLC4A7
3.35194143233792e-122	-0.598852	0.193	0.43	7.89248129658286e-118	M1	TYMP
3.35361521847874e-122	-2.2306	0.011	0.133	7.89642239343004e-118	M1	CERT1
3.36755531700525e-122	-1.03251	0.046	0.201	7.92924574942056e-118	M1	PCM1
3.60622198210953e-122	-2.17183	0.013	0.137	8.4912102790751e-118	M1	P4HA1
5.09881972965604e-122	-2.80402	0.006	0.122	1.20056809354481e-117	M1	LINC02256
6.22229911435719e-122	-0.815975	0.066	0.236	1.46510254946654e-117	M1	ARF6
7.28677500449806e-122	-0.726436	0.071	0.245	1.71574404255911e-117	M1	DDX21
7.51272809624901e-122	-2.96509	0.01	0.128	1.76894695754279e-117	M1	DOCK5
8.10034364989373e-122	0.622295	0.779	0.761	1.90730691580398e-117	M1	SLC25A6
9.65302466625899e-122	-0.762035	0.151	0.364	2.27290118791734e-117	M1	MNDA
9.66401200322737e-122	-0.893519	0.053	0.213	2.27548826627992e-117	M1	TTC3
1.11263964938643e-121	-0.610928	0.097	0.289	2.6198213184453e-117	M1	SMAP2
1.71066318311322e-121	-0.654552	0.086	0.271	4.02792753095838e-117	M1	PARVG
2.46506854597389e-121	-2.65634	0.01	0.129	5.80425039835012e-117	M1	ANO6
2.55138440000719e-121	-1.88297	0.02	0.149	6.00748970825693e-117	M1	GAA
3.23957085952294e-121	-1.33455	0.027	0.164	7.62789354583272e-117	M1	EVI2A
3.31760360511355e-121	-1.00672	0.045	0.199	7.81162944860036e-117	M1	RER1
3.74271288824582e-121	-2.71749	0.009	0.126	8.8125917666636e-117	M1	ZMYM2
4.86913241876448e-121	-3.49042	0.006	0.12	1.14648591932229e-116	M1	NFAT5
5.2037151165933e-121	-1.31355	0.125	0.309	1.22526676135306e-116	M1	HLA-DQA2
5.90253513196439e-121	-0.542608	0.143	0.365	1.38981092217234e-116	M1	H2AFY
7.92498103097218e-121	-3.30287	0.005	0.118	1.86601603355271e-116	M1	SIK3
2.01802758225897e-120	-1.84699	0.028	0.163	4.75164774518696e-116	M1	GPRIN3
2.04619077378468e-120	-0.519936	0.122	0.329	4.81796079595341e-116	M1	TCF25
2.09682698111079e-120	-1.64469	0.024	0.158	4.93718880972348e-116	M1	ENG
2.31703399385925e-120	-0.695016	0.077	0.256	5.45568824194099e-116	M1	RABAC1
2.81099618194605e-120	-1.87149	0.015	0.139	6.61877161001018e-116	M1	UPF2
3.12850781999053e-120	-2.84983	0.008	0.124	7.3663845129497e-116	M1	ST3GAL1
6.37825093454842e-120	-2.55527	0.01	0.129	1.50182296504877e-115	M1	CDKN1B
6.63787280691903e-120	-1.29475	0.039	0.185	1.56295353111715e-115	M1	RBMS1
1.06471025654593e-119	-0.500597	0.194	0.441	2.50696677006305e-115	M1	CNPY3
1.19598429744105e-119	-0.965949	0.056	0.216	2.8160646267547e-115	M1	CUX1
1.33708846863443e-119	-3.87748	0.004	0.113	3.14830850824663e-115	M1	TMEM87A
2.00459215278799e-119	-2.138	0.013	0.135	4.72001268295459e-115	M1	LRRK1
2.13749661641381e-119	-1.37943	0.032	0.172	5.03294953300795e-115	M1	CEP170
2.14713741339917e-119	-1.06623	0.041	0.19	5.05564975358969e-115	M1	NAGA
2.64746522077326e-119	-3.78552	0.004	0.114	6.23372160883271e-115	M1	JARID2
3.01283333674912e-119	-2.89819	0.007	0.122	7.09401737470947e-115	M1	PTPRJ
3.12329349614285e-119	-2.53229	0.01	0.127	7.35410686601796e-115	M1	TMEM30A
3.41316616627095e-119	-1.1349	0.04	0.187	8.03664105510157e-115	M1	HOOK3
3.64700804859414e-119	-1.72594	0.019	0.146	8.58724515121976e-115	M1	TRIM38
3.66833176729116e-119	-1.09822	0.038	0.183	8.63745397926377e-115	M1	PLCB2
3.77140425248586e-119	-1.39672	0.03	0.167	8.8801484529032e-115	M1	BMP2K
4.24360870362223e-119	-2.4286	0.01	0.126	9.9920010535489e-115	M1	PTPRA
8.25302918630339e-119	-4.71308	0.002	0.109	1.943258252207e-114	M1	TMEM131
8.5401899569805e-119	-1.68173	0.02	0.148	2.01087312727063e-114	M1	CNTRL
1.06495503698417e-118	-0.501448	0.164	0.392	2.50754313008294e-114	M1	GRB2
1.09073976207103e-118	-2.10803	0.016	0.14	2.56825584377246e-114	M1	ATF7IP
1.11291067108668e-118	-1.50086	0.023	0.154	2.6204594661407e-114	M1	WAC
1.18013282159912e-118	-0.902812	0.064	0.229	2.77874074173728e-114	M1	TAF15
1.19399927469278e-118	-0.752929	0.172	0.388	2.81139069219163e-114	M1	TUBA1A
1.25047435331468e-118	-2.87977	0.009	0.124	2.94436691231474e-114	M1	PAG1
1.61858741826031e-118	-1.32684	0.032	0.172	3.81112593503572e-114	M1	NRDC
1.6315061605952e-118	-1.4908	0.025	0.157	3.84154440573746e-114	M1	EVI5
2.05781702964847e-118	-1.31818	0.028	0.163	4.8453359780103e-114	M1	MANBA
2.91506749538237e-118	-2.3087	0.01	0.127	6.86381792462733e-114	M1	LILRB1
2.9621374721104e-118	-0.540027	0.272	0.512	6.97464889183115e-114	M1	LGALS1
5.10492263847543e-118	-1.45375	0.03	0.167	1.20200508445542e-113	M1	ORMDL1
6.35130322945383e-118	-1.44372	0.021	0.15	1.4954778584072e-113	M1	CNPY2
7.28999880850949e-118	-1.52838	0.027	0.16	1.71650311945164e-113	M1	SMARCC1
9.85137212045299e-118	-0.65152	0.194	0.427	2.31960407948186e-113	M1	FYB1
1.34063193185167e-117	-0.587588	0.105	0.298	3.15665194673794e-113	M1	TNFSF13B
1.36248043111661e-117	-1.82258	0.019	0.145	3.20809642310717e-113	M1	MKLN1
1.5115411152626e-117	0.528207	0.811	0.799	3.55907470999732e-113	M1	EEF1D
1.74553234414641e-117	-0.575126	0.1	0.291	4.11003045752713e-113	M1	RBPJ
2.02786566515559e-117	-1.7995	0.019	0.144	4.77481249517535e-113	M1	SRPK2
2.6021453332354e-117	-1.51621	0.027	0.161	6.12701140163607e-113	M1	TMBIM1
2.79792413886297e-117	-1.81257	0.016	0.139	6.58799217736675e-113	M1	HECTD1
3.06339256085493e-117	-2.98344	0.005	0.115	7.21306412378901e-113	M1	PLXNB2
3.39450795548026e-117	-2.54657	0.009	0.123	7.99270843197382e-113	M1	MYADM
3.8175228465947e-117	-1.20715	0.038	0.182	8.98873929459189e-113	M1	TM6SF1
3.83787129672581e-117	-1.93409	0.015	0.136	9.0366517552706e-113	M1	TUT7
3.86294701054063e-117	-3.12835	0.005	0.114	9.09569503101897e-113	M1	IL6R
3.88184737249372e-117	-3.09643	0.005	0.115	9.14019782327372e-113	M1	LILRB3
3.95709900132232e-117	-1.03974	0.05	0.203	9.31738530851353e-113	M1	PRPF8
5.03766114962426e-117	-2.2943	0.011	0.127	1.18616769429053e-112	M1	RNF145
5.68413798608652e-117	-1.51937	0.024	0.155	1.33838713020393e-112	M1	UBAC2
6.082986110846e-117	-2.82713	0.008	0.121	1.4322999096598e-112	M1	SCLT1
6.42730720710885e-117	-2.99575	0.006	0.117	1.51337375498585e-112	M1	SLC38A10
6.43103826053697e-117	-0.617528	0.099	0.288	1.51425226882603e-112	M1	HACD4
7.03851937850806e-117	-2.24418	0.019	0.143	1.65728977286351e-112	M1	JUN
7.62229555729484e-117	-1.82197	0.015	0.137	1.79474571192064e-112	M1	ZNF644
1.43570911470753e-116	-0.511724	0.25	0.514	3.38052068149034e-112	M1	MSN
1.48788020002152e-116	-2.18629	0.015	0.135	3.50336271897067e-112	M1	AKNA
1.72544644852105e-116	-2.23948	0.014	0.134	4.06273620768767e-112	M1	CTSA
1.95259794591934e-116	-3.07677	0.006	0.116	4.59758712346167e-112	M1	C9orf72
1.97950716404351e-116	-2.63159	0.008	0.121	4.66094756845686e-112	M1	FAM49A
2.41577888584316e-116	-0.963452	0.052	0.207	5.68819296460631e-112	M1	TMOD3
3.13469534970095e-116	-1.80052	0.016	0.138	7.38095367040585e-112	M1	SIRPA
3.67009819372274e-116	-2.07377	0.013	0.131	8.64161320693956e-112	M1	SETD2
3.80280957052679e-116	-1.39448	0.028	0.161	8.95409541476238e-112	M1	LPIN2
4.59070810828903e-116	-2.94341	0.007	0.117	1.08092813117773e-111	M1	VPS13B
5.53809547069541e-116	-5.40238	0.003	0.108	1.30399995952994e-111	M1	MTRNR2L8
7.1948273333457e-116	-2.55664	0.01	0.125	1.69409404390958e-111	M1	RASA2
8.09773966003545e-116	-0.486862	0.203	0.451	1.90669378035195e-111	M1	ATP6V0E1
8.39261356976135e-116	-1.26156	0.036	0.177	1.97612479113601e-111	M1	AP3B1
1.3121351193762e-115	-2.91096	0.008	0.12	3.08955335208319e-111	M1	SQLE
1.69178216513033e-115	-0.807866	0.082	0.257	3.98347028601587e-111	M1	SEPTIN6
2.0161088935345e-115	-0.643537	0.138	0.343	4.74713000071633e-111	M1	HIF1A
2.10584195311113e-115	-2.02914	0.016	0.136	4.95841546279546e-111	M1	DOCK11
4.55744372096675e-115	-0.969929	0.054	0.208	1.07309569853883e-110	M1	PTBP3
4.84079292622314e-115	-0.897671	0.061	0.222	1.1398131024085e-110	M1	TMED2
5.25521994366126e-115	-2.54768	0.009	0.122	1.23739408793448e-110	M1	ATF6B
5.39742883061492e-115	-1.34073	0.044	0.189	1.27087859245659e-110	M1	TCF12
6.47817013846694e-115	0.621508	0.83	0.794	1.52534994080343e-110	M1	RPL13A
7.23461517880758e-115	-3.22876	0.005	0.112	1.70346249000203e-110	M1	TAP2
8.88561433539552e-115	-2.1576	0.019	0.141	2.09220675141223e-110	M1	SSBP2
1.03036088278503e-114	-2.71397	0.01	0.124	2.42608773460564e-110	M1	STAB1
1.29694785976243e-114	-0.738755	0.095	0.277	3.05379343059662e-110	M1	SFPQ
1.62469163667646e-114	-1.94137	0.014	0.132	3.82549892771839e-110	M1	SPEN
1.64459643701624e-114	-2.46021	0.011	0.126	3.87236677059844e-110	M1	GRK3
3.07291260058983e-114	-2.65709	0.01	0.123	7.23548000934881e-110	M1	PEAK1
3.91175187860804e-114	-1.69012	0.018	0.14	9.21061097337048e-110	M1	BAZ1A
4.84000923468435e-114	-1.53482	0.046	0.191	1.13962857439878e-109	M1	GIMAP7
7.20166658019506e-114	-0.481634	0.168	0.393	1.69570441297273e-109	M1	HNRNPU
8.96088312481087e-114	-2.08421	0.014	0.131	2.10992954056797e-109	M1	GPATCH8
1.14084419738238e-113	-2.11467	0.013	0.128	2.68623174715656e-109	M1	CITED2
2.56472462986812e-113	-1.3799	0.039	0.179	6.03890061348749e-109	M1	CDC42SE2
3.77085597082243e-113	-2.78635	0.009	0.119	8.8788574688985e-109	M1	VTI1A
4.05668068294588e-113	-1.20704	0.033	0.169	9.55186033606437e-109	M1	HLA-DOA
4.7910624119119e-113	-0.745069	0.096	0.277	1.12810355550878e-108	M1	PLSCR1
5.7219559208765e-113	-0.83174	0.054	0.208	1.34729174112958e-108	M1	SRSF10
5.76106038532384e-113	0.598497	0.762	0.733	1.35649927832835e-108	M1	NME2
6.51686253866076e-113	-1.41864	0.024	0.152	1.53446045335306e-108	M1	AFF4
8.64249386630717e-113	-2.18953	0.016	0.134	2.03496160576069e-108	M1	IRF1
1.05968866067765e-112	-2.53747	0.009	0.119	2.49514292043159e-108	M1	KMT2A
1.62872324265375e-112	-1.96777	0.017	0.137	3.83499174715252e-108	M1	SNX29
1.93767340372587e-112	-1.73932	0.036	0.172	4.56244579641293e-108	M1	HMGB2
2.29916005781356e-112	0.696002	0.692	0.675	5.41360227212782e-108	M1	TOMM7
3.66023227243405e-112	-0.598467	0.103	0.291	8.61838290867321e-108	M1	PTP4A2
4.47335876354537e-112	-1.32623	0.032	0.165	1.05329705446439e-107	M1	INO80D
5.65388578105185e-112	-2.1859	0.013	0.128	1.33126394600647e-107	M1	WDR70
5.80376123802103e-112	-0.569167	0.104	0.291	1.36655362110443e-107	M1	IFI16
9.7044485254707e-112	-1.14062	0.032	0.166	2.28500944980733e-107	M1	RSRC2
1.07678173826393e-111	-2.09695	0.013	0.127	2.53539028091626e-107	M1	ATF6
1.1833296646016e-111	-1.20686	0.029	0.159	2.78626802827092e-107	M1	EIF2AK4
1.47184030293366e-111	-1.57559	0.027	0.155	3.4655951772876e-107	M1	EML4
1.55795213533762e-111	-1.87983	0.023	0.148	3.66835409786596e-107	M1	NAMPT
1.79625589423101e-111	-2.42075	0.008	0.117	4.22946412855634e-107	M1	EP300
1.87177566879034e-111	-2.4133	0.009	0.118	4.40728298973372e-107	M1	GOLGB1
2.61822378708998e-111	-0.837791	0.066	0.227	6.16486972908206e-107	M1	KLF3
2.99573884141297e-111	-0.755571	0.103	0.285	7.05376667599097e-107	M1	MS4A7
3.6631853489225e-111	-2.02159	0.015	0.132	8.62533622257292e-107	M1	TMEM35B
5.82455088985856e-111	-2.15548	0.013	0.127	1.3714487525261e-106	M1	AGTPBP1
6.7247130365704e-111	-1.39981	0.022	0.146	1.58340093159087e-106	M1	PNN
7.58781224240588e-111	-1.43167	0.028	0.156	1.78662627059689e-106	M1	ARHGEF1
9.34261248955939e-111	-2.19843	0.012	0.124	2.19981153679165e-106	M1	BDP1
9.5923953516438e-111	-2.94488	0.006	0.112	2.25862540949805e-106	M1	SNX14
1.12912059590974e-110	-2.31967	0.011	0.123	2.65862735512906e-106	M1	TRA2A
1.3717116544271e-110	-2.40571	0.013	0.125	3.22983226151405e-106	M1	PDIA4
1.38092672865361e-110	-0.463724	0.142	0.353	3.25153007528779e-106	M1	XRCC5
1.51750637006108e-110	-0.923558	0.051	0.2	3.57312049894582e-106	M1	COPA
1.70318896184451e-110	-1.8811	0.015	0.131	4.01032872955907e-106	M1	CD151
1.87561697495382e-110	-3.4581	0.004	0.107	4.41632772922625e-106	M1	ACSL3
2.0979131856078e-110	-4.15633	0.003	0.105	4.93974638683213e-106	M1	ATP2B4
3.17051004967985e-110	-1.45541	0.028	0.156	7.46528296297617e-106	M1	BBX
3.7382861620386e-110	-1.78746	0.017	0.134	8.80216859713608e-106	M1	NAAA
4.2503713405046e-110	-1.9346	0.013	0.126	1.00079243583521e-105	M1	TMED4
4.42855398736025e-110	-2.46188	0.012	0.124	1.04274732186384e-105	M1	CYP20A1
4.74772528675745e-110	-2.45364	0.009	0.117	1.11789939601991e-105	M1	ERC1
5.64215326030768e-110	-1.17887	0.032	0.165	1.32850140667205e-105	M1	ZFAND5
5.74976838515146e-110	-3.76291	0.003	0.105	1.35384046396776e-105	M1	SUSD6
7.01495584820842e-110	-0.844507	0.066	0.224	1.65174150401915e-105	M1	ELOVL5
7.34797611483784e-110	-1.51574	0.024	0.148	1.73015445599972e-105	M1	EMC10
7.83220049899924e-110	-3.64909	0.004	0.106	1.84416992949436e-105	M1	KLF4
8.89671377089004e-110	-2.55698	0.012	0.123	2.09482022449377e-105	M1	ADD3
1.062492971086e-109	-1.74786	0.031	0.16	2.5017459497191e-105	M1	IFI6
1.60640362369787e-109	-3.2646	0.005	0.108	3.782437972359e-105	M1	LGALS2
1.71044616107725e-109	-1.45497	0.029	0.158	4.02741653087249e-105	M1	GAS6
2.64222886744165e-109	-4.33311	0.002	0.101	6.22139209127811e-105	M1	CERS6
2.93995044459799e-109	-1.69778	0.019	0.138	6.92240731685042e-105	M1	MIER1
5.34041854905424e-109	-0.843337	0.048	0.193	1.25745495156031e-104	M1	TOP1
7.67474776608828e-109	-4.20801	0.002	0.101	1.80709610900315e-104	M1	MAN1A1
8.08763142472411e-109	-1.20106	0.03	0.158	1.90431369526554e-104	M1	PREX1
9.17083328189787e-109	-0.74688	0.084	0.253	2.15936440455567e-104	M1	STXBP2
1.0433495420213e-108	-2.22401	0.009	0.116	2.45667083164334e-104	M1	METRNL
1.30176492816964e-108	-0.428034	0.16	0.378	3.06513569986823e-104	M1	DEK
1.51897154043386e-108	-0.818531	0.048	0.192	3.57657038910556e-104	M1	THEMIS2
1.63772789952824e-108	-1.69305	0.02	0.139	3.8561941122292e-104	M1	PRNP
1.65861677263699e-108	-1.57624	0.024	0.146	3.90537905285105e-104	M1	ACTN4
1.69904272598618e-108	-2.0836	0.013	0.125	4.00056600260705e-104	M1	ABR
1.89781331410132e-108	-1.14879	0.523	0.593	4.46859122938296e-104	M1	C1QC
2.30248428412774e-108	-0.732319	0.061	0.216	5.42142949540718e-104	M1	VAMP2
2.46861399711913e-108	-0.537399	0.248	0.492	5.81259851761671e-104	M1	MEF2C
3.18139979169296e-108	-0.972179	0.055	0.203	7.49092394952025e-104	M1	LILRB4
3.45009097286216e-108	-1.44417	0.029	0.156	8.12358420470125e-104	M1	TANK
3.5383202405578e-108	-0.436977	0.173	0.395	8.3313288384174e-104	M1	HNRNPDL
3.61667336468452e-108	-3.83456	0.003	0.102	8.51581910448617e-104	M1	CLK1
3.72814693773377e-108	-2.93277	0.006	0.109	8.77829477958793e-104	M1	CREB5
4.18273050387916e-108	-2.24526	0.009	0.115	9.84865724443387e-104	M1	C20orf194
4.29980703769179e-108	-1.17528	0.048	0.191	1.01243256509491e-103	M1	CCND3
6.05745000384822e-108	-0.818087	0.052	0.199	1.4262871779061e-103	M1	YY1
6.42894044110804e-108	-1.22133	0.032	0.162	1.5137583162633e-103	M1	PHF3
7.1878992363805e-108	-1.75152	0.019	0.137	1.69246275419815e-103	M1	CCNY
1.09066073126332e-107	-3.49279	0.005	0.106	2.56806975783262e-103	M1	KIAA1109
1.21003449120228e-107	-1.98881	0.018	0.135	2.84914721298488e-103	M1	GSK3B
2.37042210073657e-107	-0.535941	0.146	0.353	5.58139587839432e-103	M1	SPCS1
2.62967337889866e-107	-1.94055	0.016	0.129	6.1918289379548e-103	M1	ZNF148
3.09373941031015e-107	-1.16923	0.028	0.153	7.28451881551629e-103	M1	TSPAN3
4.51142323690342e-107	0.929701	0.587	0.54	1.06225971536128e-102	M1	CHCHD10
4.53520657602249e-107	-2.12423	0.014	0.125	1.06785974039026e-102	M1	RANBP2
4.7663464297931e-107	-2.48006	0.008	0.113	1.12228393035908e-102	M1	ZBTB7A
4.90537611583415e-107	-1.15839	0.048	0.19	1.15501986023431e-102	M1	TNFAIP8
5.01834994976267e-107	-0.888359	0.051	0.196	1.18162067917112e-102	M1	PDCD6IP
6.33743580422629e-107	-2.36893	0.011	0.119	1.49221263446312e-102	M1	SOAT1
1.14563455864872e-106	-1.4764	0.021	0.14	2.69751113179428e-102	M1	SCIMP
1.18558842985842e-106	-1.47004	0.019	0.135	2.79158651694464e-102	M1	SH3TC1
1.3222857688824e-106	-2.14073	0.011	0.12	3.11345407141049e-102	M1	MRTFA
1.52440026115496e-106	-3.72136	0.004	0.103	3.58935285491547e-102	M1	ARL15
1.86131716201545e-106	-0.81333	0.081	0.245	4.38265738968159e-102	M1	CNN2
2.77595996341794e-106	-1.87181	0.015	0.127	6.53627532986387e-102	M1	DNAJC1
4.28794304906251e-106	-2.73496	0.006	0.107	1.00963907033226e-101	M1	TRIO
5.97998224655622e-106	-2.86129	0.006	0.108	1.40804661977413e-101	M1	KIDINS220
6.09803944848378e-106	-2.57833	0.009	0.114	1.43584436853999e-101	M1	ATP1B1
6.91285654551618e-106	-2.51	0.007	0.11	1.62770120220724e-101	M1	GPCPD1
7.87445809596877e-106	-5.13132	0.001	0.096	1.85411990327681e-101	M1	CCR2
1.07088479173153e-105	-1.30196	0.029	0.154	2.52150533061107e-101	M1	TMEM173
1.08103231329713e-105	-2.26999	0.009	0.113	2.54539868488943e-101	M1	SCAMP3
1.55947401140107e-105	-1.71103	0.023	0.143	3.67193750724497e-101	M1	LEPROTL1
1.99515350579107e-105	-1.28673	0.032	0.159	4.69778844473565e-101	M1	NSD3
2.54175776737027e-105	-0.626175	0.076	0.239	5.98482283905004e-101	M1	OGFRL1
4.27180065940294e-105	-1.21983	0.027	0.149	1.00583818326302e-100	M1	UBE3A
4.42155677335409e-105	-0.61472	0.071	0.229	1.04109975785395e-100	M1	XRN2
4.67734714702485e-105	-0.760949	0.059	0.208	1.10132815923847e-100	M1	PPM1G
5.18537187947775e-105	-3.64464	0.003	0.101	1.22094766274183e-100	M1	FNIP1
6.33481638389765e-105	-1.06453	0.031	0.158	1.49159586575254e-100	M1	LILRA2
6.52486325457333e-105	-1.09166	0.036	0.168	1.53634430192184e-100	M1	TAB2
8.64291947526252e-105	-3.36542	0.005	0.104	2.03506181964531e-100	M1	SETD5
9.91552457771922e-105	-1.95466	0.018	0.131	2.33470941706977e-100	M1	IFNAR2
1.00048407867472e-104	-1.57242	0.02	0.135	2.3557398116475e-100	M1	PUM1
1.13601203022343e-104	-1.58119	0.021	0.139	2.67485392636409e-100	M1	WDFY2
1.36508005994903e-104	-0.449494	0.129	0.325	3.21421750915599e-100	M1	SF3B2
1.68396253927882e-104	-0.675404	0.053	0.198	3.96505819498591e-100	M1	TMEM147
1.82578713134317e-104	-1.92845	0.013	0.122	4.29899837946064e-100	M1	AFTPH
1.83099504002489e-104	-1.48221	0.026	0.146	4.3112609212426e-100	M1	NFKB1
1.83534210561996e-104	-1.66911	0.02	0.136	4.32149652189275e-100	M1	TAOK1
2.38972746507111e-104	-0.926671	0.047	0.186	5.62685228925643e-100	M1	PHF20
2.42851365152915e-104	-0.578318	0.105	0.283	5.71817824389053e-100	M1	LIMS1
3.12909137711571e-104	-1.26252	0.03	0.155	7.36775855655664e-100	M1	EMB
3.39458845758045e-104	-2.50478	0.01	0.114	7.99289798221893e-100	M1	ARFGEF1
4.26366524149269e-104	-3.5626	0.004	0.1	1.00392261776187e-99	M1	RNF144B
4.46886109806827e-104	-0.420552	0.106	0.289	1.05223803415115e-99	M1	VPS35
4.74519300734773e-104	-1.31687	0.066	0.214	1.1173031455101e-99	M1	VMO1
4.79649094013724e-104	-3.95644	0.004	0.101	1.12938175676471e-99	M1	SPPL3
4.8375487001261e-104	-1.00734	0.041	0.175	1.13904921693169e-99	M1	HNRNPH1
5.08805378231968e-104	-0.758412	0.078	0.239	1.19803314358499e-99	M1	LAIR1
7.78072315744168e-104	-1.80526	0.02	0.135	1.83204907465122e-99	M1	AAK1
7.87269963575398e-104	-0.351955	0.219	0.459	1.85370585623463e-99	M1	TLN1
8.07930158953198e-104	-0.434898	0.174	0.391	1.9023523522712e-99	M1	PTPN6
1.08836795305439e-103	-2.27403	0.011	0.116	2.56267118226188e-99	M1	UBR2
1.09901420109108e-103	-0.673615	0.089	0.257	2.58773883788906e-99	M1	CEBPB
1.21890132476728e-103	-1.03844	0.036	0.166	2.87002505929704e-99	M1	IFNAR1
1.27365856219382e-103	-1.03013	0.054	0.197	2.99895645054156e-99	M1	RAD21
1.30278626238921e-103	-2.85983	0.006	0.105	3.06754053342164e-99	M1	MAN2A1
1.46729766626957e-103	-0.991139	0.049	0.188	3.45489908499834e-99	M1	CDC42SE1
1.48897648115713e-103	-0.851807	0.05	0.191	3.50594402253258e-99	M1	WASHC4
1.71051157681962e-103	-1.84637	0.016	0.127	4.02757055877947e-99	M1	HERC2
2.37993788891554e-103	-1.75048	0.021	0.137	5.60380175324052e-99	M1	PARP8
2.84594515137041e-103	-2.20358	0.012	0.117	6.70106245341676e-99	M1	TNFSF10
3.26240565949494e-103	-0.93943	0.036	0.165	7.6816603658468e-99	M1	PRPF4B
3.72964307206057e-103	-0.924106	0.047	0.185	8.78181757747381e-99	M1	SRSF4
4.89002071709897e-103	-1.67427	0.018	0.131	1.15140427804812e-98	M1	OGDH
5.05759175058697e-103	-4.5096	0.002	0.096	1.19086055359321e-98	M1	EDEM3
5.40379505704386e-103	-1.25891	0.021	0.136	1.27237758413155e-98	M1	LTBR
5.59142982169634e-103	-1.61236	0.019	0.133	1.31655806581662e-98	M1	APAF1
5.68720123772179e-103	-1.5363	0.022	0.138	1.33910840343397e-98	M1	MBNL2
5.80382942538793e-103	-3.99625	0.004	0.099	1.36656967650184e-98	M1	MEGF9
6.0702324393617e-103	-1.19278	0.03	0.154	1.4292969301721e-98	M1	CBL
7.43395515833361e-103	-1.37461	0.034	0.161	1.75039908158123e-98	M1	H1FX
9.55637476318829e-103	-0.959311	0.038	0.169	2.25014400174032e-98	M1	TEX264
9.95285204102792e-103	-2.25826	0.009	0.112	2.34349854158043e-98	M1	PTPN22
1.14738130358537e-102	-1.1226	0.028	0.15	2.70162401742211e-98	M1	TRABD
1.3881429196008e-102	-2.29083	0.009	0.111	3.26852131849205e-98	M1	MARK3
1.38817294513091e-102	-0.861325	0.041	0.174	3.26859201660524e-98	M1	WAPL
1.40068185863423e-102	-0.529857	0.112	0.295	3.29804550434016e-98	M1	KDELR1
1.54184453209012e-102	-3.75878	0.004	0.099	3.6304271352594e-98	M1	SERINC5
1.57412845491135e-102	-1.11924	0.037	0.167	3.70644285993426e-98	M1	HAVCR2
1.84305392750886e-102	-3.02742	0.006	0.105	4.33965477771236e-98	M1	SFMBT2
1.9008074797365e-102	-3.61897	0.003	0.098	4.47564129178757e-98	M1	MON2
1.93221005466893e-102	-2.56551	0.007	0.107	4.54958179472346e-98	M1	POGZ
2.02528547219364e-102	-1.98161	0.016	0.125	4.76873717282714e-98	M1	MALT1
2.05962270467397e-102	-0.949642	0.041	0.174	4.84958762042534e-98	M1	SNRNP70
2.55124481031668e-102	-0.94605	0.052	0.193	6.00716103037164e-98	M1	ARHGAP45
2.72063362560908e-102	-0.661225	0.067	0.22	6.40600393485913e-98	M1	PTPN2
3.52505321523302e-102	-0.517393	0.095	0.267	8.30009030058768e-98	M1	NCKAP1L
3.54564010554982e-102	-1.8855	0.016	0.125	8.34856419252761e-98	M1	MYO5A
3.57719651832127e-102	-1.513	0.039	0.167	8.42286692203926e-98	M1	CREM
4.13039071700991e-102	-0.945423	0.041	0.174	9.72541798227154e-98	M1	ZRANB2
4.28758382655294e-102	-1.13403	0.033	0.159	1.00955448780016e-97	M1	CHD4
4.61575118914548e-102	-0.61881	0.073	0.231	1.08682477499619e-97	M1	CD33
5.11131210643112e-102	-1.52069	0.02	0.133	1.20350954858027e-97	M1	PHF20L1
5.28848919153935e-102	-2.93005	0.007	0.107	1.24522766503986e-97	M1	SEL1L
5.35387512059045e-102	-1.26928	0.022	0.138	1.26062343589423e-97	M1	RAB24
6.04407975301883e-102	-0.686671	0.045	0.182	1.42313901864581e-97	M1	EIF5B
6.1431177187143e-102	-3.10043	0.007	0.106	1.44645849804847e-97	M1	PHACTR2
7.23048390127136e-102	-1.27681	0.035	0.162	1.70248973939335e-97	M1	SBF2
7.64084003175915e-102	-1.05285	0.031	0.154	1.79911219387801e-97	M1	EIF4G1
1.11125034419719e-101	-0.633107	0.086	0.251	2.61655006044671e-97	M1	TRAM1
1.1381427626494e-101	-0.481073	0.148	0.35	2.67987094893428e-97	M1	SEPTIN7
1.23083752626878e-101	-0.93377	0.045	0.18	2.89813003935246e-97	M1	TMEM9B
1.64498939556153e-101	-2.86491	0.005	0.102	3.87329203078918e-97	M1	RBBP6
2.93554399481759e-101	-2.40557	0.01	0.112	6.9120318901975e-97	M1	TSPAN4
3.22643710789704e-101	-1.42723	0.032	0.155	7.59696881425436e-97	M1	GNA13
3.69697809246069e-101	-0.40064	0.155	0.362	8.70490461650795e-97	M1	WASF2
6.01344505499598e-101	0.635412	0.775	0.75	1.41592577264935e-96	M1	RPL7
7.27864808405632e-101	-1.4102	0.022	0.137	1.7138304778719e-96	M1	THOC2
8.95712594439862e-101	-2.65136	0.007	0.106	2.1090448748681e-96	M1	PHF21A
1.09595286423574e-100	-1.35881	0.027	0.146	2.58053061412948e-96	M1	SGK3
1.16339194196466e-100	-1.51224	0.022	0.136	2.73932266655e-96	M1	FUCA2
1.17121896691639e-100	-1.87179	0.015	0.122	2.75775217950133e-96	M1	ID2
1.41786099505566e-100	-1.56107	0.021	0.135	3.33849549895805e-96	M1	RAB11FIP1
1.73638465557137e-100	-0.608346	0.073	0.228	4.08849131000834e-96	M1	GNB1
2.4304075576633e-100	-1.12032	0.028	0.147	5.72263763527401e-96	M1	YTHDC1
2.55969429636528e-100	-0.346742	0.16	0.369	6.02705619022168e-96	M1	PAK2
2.65366092883704e-100	-1.97862	0.014	0.119	6.24831002303969e-96	M1	PHF14
3.95677933240216e-100	-1.17801	0.03	0.151	9.31663261607413e-96	M1	GGNBP2
4.15721516346376e-100	-1.57379	0.021	0.133	9.78857882389176e-96	M1	SP3
4.3236930510982e-100	-1.46259	0.019	0.13	1.01805676581158e-95	M1	RSBN1L
4.86617417790394e-100	-1.40225	0.02	0.132	1.14578937192926e-95	M1	BRD4
4.99643493893018e-100	-1.25412	0.026	0.143	1.1764605707205e-95	M1	PRRC2B
6.85542319157876e-100	-3.85615	0.003	0.096	1.61417794468914e-95	M1	GPR155
7.7391896319133e-100	-2.94857	0.007	0.104	1.82226959073031e-95	M1	SLC25A13
9.54205017949221e-100	-2.42223	0.011	0.113	2.24677113526323e-95	M1	FAM13B
1.00052823818018e-99	-1.32618	0.032	0.155	2.35584378961906e-95	M1	TTC7A
1.08130416001908e-99	-0.568405	0.094	0.263	2.54603877518093e-95	M1	DDX39B
1.4160236272041e-99	-1.4559	0.016	0.124	3.33416923261477e-95	M1	RNMT
1.57633588955307e-99	-0.789509	0.055	0.195	3.71164048554167e-95	M1	MAP2K1
1.66082540469029e-99	-1.7382	0.019	0.129	3.91057949788376e-95	M1	AFF1
1.6827594560768e-99	-1.20458	0.029	0.149	3.96222541527843e-95	M1	STAT6
1.7201506149665e-99	-0.824015	0.05	0.187	4.05026663800012e-95	M1	PAFAH1B1
2.05784814163147e-99	-2.03869	0.021	0.133	4.84540923428547e-95	M1	BCL2
2.14343517343647e-99	-0.629243	0.066	0.216	5.04693245937352e-95	M1	LPAR6
2.51129138245575e-99	-1.15893	0.028	0.148	5.91308668913031e-95	M1	YIPF3
2.98857135731893e-99	-1.06488	0.035	0.161	7.03689011794314e-95	M1	SYPL1
3.74527870010513e-99	-1.19225	0.036	0.162	8.81863322726755e-95	M1	CSMD1
4.06106296028128e-99	-4.98426	0.001	0.091	9.5621788462783e-95	M1	XIST
4.1011230922185e-99	-1.02793	0.041	0.171	9.65650443293768e-95	M1	HVCN1
4.63172328543826e-99	-1.07381	0.042	0.171	1.09058556478929e-94	M1	TMPO
4.69966638414247e-99	-1.19051	0.032	0.154	1.10658344681019e-94	M1	CGGBP1
4.99977460762467e-99	-1.42917	0.028	0.146	1.1772469291113e-94	M1	GAS7
6.16688989419303e-99	-0.69204	0.088	0.249	1.45205589448669e-94	M1	APMAP
6.32915052033953e-99	-1.88427	0.016	0.123	1.49026178151915e-94	M1	HERC4
6.81675178243279e-99	-2.67137	0.006	0.103	1.60507237469162e-94	M1	DENND4A
7.32511607427218e-99	-1.92072	0.014	0.119	1.72477183084813e-94	M1	CLASP2
1.16786810374019e-98	-0.817058	0.044	0.177	2.74986223706665e-94	M1	IRF9
1.2088972617669e-98	-3.8732	0.003	0.094	2.84646949255635e-94	M1	P2RX7
1.25969454814998e-98	-3.28888	0.004	0.097	2.96607678307395e-94	M1	QSOX1
1.56120465174864e-98	-2.17501	0.007	0.103	3.67601247300735e-94	M1	NCSTN
2.1204040454864e-98	-4.47641	0.001	0.09	4.99270336550228e-94	M1	AC009093.2
2.14241694264712e-98	-1.99614	0.01	0.109	5.04453493315692e-94	M1	CREBBP
2.71835483559424e-98	0.662175	0.705	0.696	6.40063829589021e-94	M1	COMMD6
4.13689946318464e-98	-1.51233	0.02	0.13	9.74074347601456e-94	M1	KCNQ1
4.18152360590007e-98	-0.828178	0.051	0.187	9.84581548245232e-94	M1	PRAM1
4.84976298130182e-98	-1.28445	0.022	0.134	1.14192519157733e-93	M1	DHX36
5.27956338233749e-98	-2.0407	0.012	0.114	1.24312599400519e-93	M1	DNAJB14
5.36000194611905e-98	-0.421326	0.191	0.409	1.26206605823319e-93	M1	APBB1IP
6.68241345377146e-98	-3.18812	0.007	0.102	1.57344107182503e-93	M1	ARID5B
6.83518726822207e-98	-2.73278	0.006	0.102	1.60941319417557e-93	M1	PLCL2
7.50117102492096e-98	-2.95498	0.006	0.1	1.76622572952789e-93	M1	LENG8
7.94301834927627e-98	-3.83276	0.003	0.093	1.87026310052059e-93	M1	SLC49A4
8.17012253640361e-98	-2.43578	0.007	0.104	1.92373705242159e-93	M1	PNPLA6
8.28860132288371e-98	-1.28221	0.024	0.137	1.9516340674862e-93	M1	JUND
8.90784240186847e-98	-3.02187	0.005	0.099	2.09744057194395e-93	M1	KDM4C
1.02175569132359e-97	-2.74178	0.006	0.101	2.40582595079052e-93	M1	TNRC18
1.08923820311832e-97	-1.9339	0.019	0.126	2.5647202730624e-93	M1	FAF1
1.21183444687498e-97	-3.27537	0.004	0.096	2.85338538861183e-93	M1	SLC12A6
1.28499000522279e-97	-0.543203	0.099	0.267	3.02563746629757e-93	M1	HNRNPM
1.38349900338257e-97	-1.54062	0.021	0.132	3.25758675336459e-93	M1	STOM
1.39161219742392e-97	-0.702932	0.051	0.188	3.27669008005435e-93	M1	GTF2I
1.41401507355925e-97	-2.44107	0.011	0.111	3.3294398922026e-93	M1	IMMP2L
1.48655982702025e-97	-2.45031	0.01	0.109	3.50025376870189e-93	M1	SEC61A1
1.70171614134146e-97	-1.23408	0.022	0.135	4.00686082640259e-93	M1	TLR1
1.79529526578164e-97	-1.22523	0.019	0.127	4.22720223280946e-93	M1	PABPN1
2.00785407661717e-97	-3.07996	0.006	0.1	4.7276932088028e-93	M1	MBD5
3.2567358872203e-97	-3.75231	0.004	0.096	7.66831032004892e-93	M1	IL3RA
3.344640044203e-97	-0.978932	0.034	0.157	7.87528944808039e-93	M1	SLC66A3
3.99393095265288e-97	-4.53067	0.002	0.09	9.40410982111646e-93	M1	TTC14
4.56219999544197e-97	0.767991	0.644	0.627	1.07421561092677e-92	M1	UQCRB
4.78110238526811e-97	-1.37005	0.035	0.156	1.12575836763523e-92	M1	CDKN1A
5.42416520958363e-97	-2.63327	0.006	0.1	1.27717394024856e-92	M1	TMEM259
5.54263586988476e-97	-1.94847	0.013	0.114	1.30506904192307e-92	M1	MAP3K2
5.73309619554401e-97	-1.54044	0.017	0.122	1.34991483020279e-92	M1	RB1CC1
6.84207421967554e-97	-2.30737	0.009	0.106	1.6110347957648e-92	M1	TBL1X
7.25259578024809e-97	-1.79078	0.017	0.123	1.70769620241721e-92	M1	TAGAP
8.19322496860341e-97	-0.611453	0.062	0.206	1.92917675110736e-92	M1	VKORC1
8.50123412721909e-97	-1.3103	0.03	0.148	2.00170058759501e-92	M1	GPBP1
8.92856336198574e-97	-1.14891	0.038	0.163	2.10231952921316e-92	M1	NPEPPS
1.11417542549248e-96	-0.558068	0.072	0.223	2.62343745686459e-92	M1	DYNLT1
1.17364551507354e-96	-1.03623	0.034	0.156	2.76346572979215e-92	M1	SDHA
1.1749337634455e-96	-4.14866	0.003	0.092	2.76649903940878e-92	M1	ITPR1
1.22812570150995e-96	-1.07956	0.035	0.157	2.89174477677534e-92	M1	PHYKPL
1.22850050271681e-96	-1.06961	0.035	0.158	2.89262728369701e-92	M1	DCAF7
1.29243864141471e-96	-2.51258	0.008	0.104	3.04317602507508e-92	M1	MIA3
1.62642418204018e-96	-3.49689	0.004	0.096	3.82957837903182e-92	M1	LRBA
1.77067071039828e-96	-2.44916	0.009	0.106	4.16922125470379e-92	M1	OGA
2.68243335891589e-96	-2.91117	0.005	0.098	6.31605758690334e-92	M1	ARL4C
3.0228333363291e-96	-2.57464	0.011	0.11	7.1175633737205e-92	M1	CAMK2D
3.04925746865045e-96	-1.39208	0.02	0.128	7.17978163568434e-92	M1	FAM120A
3.50376220595369e-96	-0.559721	0.072	0.223	8.24995849013855e-92	M1	SNX10
3.75945365342162e-96	-1.59365	0.02	0.129	8.85200957234654e-92	M1	ATG16L2
4.28789009070862e-96	-3.48193	0.004	0.095	1.00962660075825e-91	M1	ZNF609
5.02686818284096e-96	-1.65194	0.017	0.123	1.18362638233173e-91	M1	HELZ
5.99813589021946e-96	-3.76365	0.004	0.094	1.41232107671107e-91	M1	RAD51B
6.0300797961108e-96	-1.21896	0.031	0.15	1.41984258879225e-91	M1	PHKB
6.44243704507567e-96	-1.92936	0.014	0.116	1.51693622663352e-91	M1	SYNRG
6.51030750158026e-96	-1.07298	0.489	0.573	1.53291700432209e-91	M1	C1QB
7.7305425965511e-96	-3.00347	0.005	0.096	1.82023355978392e-91	M1	HEATR5B
9.56797549037458e-96	-0.750161	0.052	0.187	2.2528755089636e-91	M1	HNRNPD
1.02072939541587e-95	-1.80385	0.013	0.114	2.4034094344462e-91	M1	IRF2BP2
1.07744879694859e-95	-3.33036	0.004	0.094	2.53696093729514e-91	M1	TPCN1
1.54803866931462e-95	-1.8532	0.012	0.111	3.64501185076821e-91	M1	CCR1
1.93309665923172e-95	-1.9534	0.016	0.12	4.551669393827e-91	M1	MAP3K5
1.98718641952469e-95	-0.717972	0.055	0.192	4.67902914341284e-91	M1	ZNF207
2.03029094726584e-95	-0.326196	0.204	0.43	4.78052306443215e-91	M1	FAM49B
2.0903367587585e-95	-2.6869	0.008	0.102	4.92190693217276e-91	M1	WDFY4
2.25836111427791e-95	-2.32695	0.01	0.106	5.31753707967877e-91	M1	ABHD2
2.72799838103227e-95	-1.25273	0.033	0.152	6.42334498797858e-91	M1	FKBP5
2.75232535678648e-95	-1.95303	0.012	0.111	6.48062528508944e-91	M1	ZNF800
2.77557016269845e-95	-2.33444	0.011	0.109	6.53535750508976e-91	M1	USP47
2.83944544733114e-95	-0.55145	0.079	0.233	6.6857582502859e-91	M1	CAT
3.00353324560656e-95	-2.29002	0.01	0.108	7.07211938010521e-91	M1	SLC2A9
3.07058428576592e-95	-0.70001	0.082	0.236	7.22999775926444e-91	M1	WARS
3.48470014200068e-95	-0.358748	0.19	0.409	8.20507495435481e-91	M1	GNAI2
3.49822439673086e-95	-1.24896	0.024	0.136	8.23691916454248e-91	M1	SPSB3
4.08089960253456e-95	-1.64863	0.012	0.112	9.60888620412787e-91	M1	EHMT1
4.12970057159223e-95	-0.756313	0.043	0.171	9.72379296587106e-91	M1	DCP2
4.37287261508907e-95	-1.52338	0.048	0.175	1.02963658594887e-90	M1	TMEM176B
5.14103808276314e-95	-1.45077	0.019	0.126	1.21050882696741e-90	M1	EMC3
5.71745118705231e-95	-2.13618	0.014	0.114	1.34623105650334e-90	M1	COG5
5.93028087051648e-95	-0.678295	0.061	0.203	1.39634393377181e-90	M1	SELENOT
6.30397126352478e-95	-1.6721	0.016	0.12	1.48433307370954e-90	M1	HUWE1
7.64256719927089e-95	-0.802167	0.056	0.192	1.79951887274032e-90	M1	DDX3X
7.90339502983977e-95	-0.382482	0.221	0.454	1.86093339372607e-90	M1	SSR4
9.07573402489923e-95	-2.60818	0.009	0.103	2.13697233350277e-90	M1	OGT
9.41186930380163e-95	-3.51693	0.004	0.093	2.21611874627313e-90	M1	ANXA6
9.64649094440865e-95	-0.569017	0.057	0.195	2.27136275777046e-90	M1	KRAS
1.00895102520817e-94	-2.33481	0.009	0.105	2.37567608395515e-90	M1	KAT6A
1.12032394828677e-94	-0.800048	0.044	0.172	2.63791476863604e-90	M1	GIT2
1.12907392247429e-94	-1.63785	0.022	0.13	2.65851745785796e-90	M1	XRN1
1.19933431218633e-94	-2.4056	0.009	0.105	2.82395257147393e-90	M1	ERBIN
1.23186477313648e-94	-1.51977	0.018	0.122	2.90054879482717e-90	M1	RAPGEF6
1.37813064250244e-94	-0.470517	0.099	0.265	3.24494641083624e-90	M1	SRSF2
1.40916415120059e-94	-2.22899	0.01	0.107	3.31801791041691e-90	M1	FNDC3B
5.04046604713433e-94	-0.876621	0.039	0.163	1.18682813545825e-89	M1	XPO1
6.62524025331507e-94	-1.32296	0.028	0.141	1.55997907004557e-89	M1	ADK
7.26897516232388e-94	-3.13279	0.005	0.095	1.71155289172078e-89	M1	FPR3
9.54301134736899e-94	-1.11112	0.028	0.141	2.2469974518515e-89	M1	TRIP12
1.09317159532682e-93	-4.16095	0.002	0.088	2.57398183835654e-89	M1	ATP9B
1.13258473763339e-93	-1.17869	0.038	0.159	2.66678402323159e-89	M1	COMMD10
1.48645363226663e-93	-1.273	0.029	0.144	3.500003722535e-89	M1	MGAT4A
1.82194013056555e-93	-1.31961	0.025	0.136	4.28994023142964e-89	M1	TXNDC12
1.85208653781642e-93	-2.36586	0.016	0.116	4.36092296194255e-89	M1	STK17A
2.00759313406587e-93	-1.52579	0.019	0.123	4.72707879347151e-89	M1	MARCH7
2.46786096406104e-93	-1.06901	0.026	0.138	5.81082542597813e-89	M1	MOB3A
3.12813074459331e-93	-1.33654	0.023	0.131	7.36549665121941e-89	M1	RNF216
3.19071250434984e-93	-1.64883	0.019	0.123	7.51285166274213e-89	M1	PACS1
3.19652481497176e-93	-1.3374	0.024	0.133	7.52653732933251e-89	M1	PARP4
3.72928987037247e-93	-2.33959	0.01	0.105	8.78098592877903e-89	M1	PRKAG2
3.81303503338277e-93	-1.01829	0.028	0.141	8.97817228960308e-89	M1	LEPROT
4.09948618695017e-93	-3.22001	0.004	0.091	9.65265017579286e-89	M1	PDE8A
4.10013788058903e-93	-1.14092	0.031	0.146	9.65418465363493e-89	M1	USP4
4.21261051963175e-93	-5.05246	0.001	0.085	9.91901272952491e-89	M1	NBPF10
4.48782753227279e-93	-4.60211	0.002	0.087	1.05670387074895e-88	M1	FBXW7
4.57371250596727e-93	-0.339887	0.093	0.255	1.07692634665505e-88	M1	TAX1BP1
4.86469934709439e-93	-0.701932	0.043	0.169	1.14544210826684e-88	M1	OGFR
7.02453350921643e-93	-3.50267	0.005	0.093	1.6539966600801e-88	M1	VAV3
7.24276897106071e-93	-2.49479	0.006	0.097	1.70538238192596e-88	M1	CYB561D2
7.9631244084709e-93	-2.46713	0.008	0.1	1.87499727321856e-88	M1	CLIP1
9.05036946397447e-93	-0.391114	0.122	0.301	2.13099999398743e-88	M1	IFNGR2
9.50782356498755e-93	-5.14653	0.002	0.087	2.23871213661197e-88	M1	CD1E
1.33363198668029e-92	-0.972608	0.062	0.199	3.1401698758374e-88	M1	SLC26A3
1.34240872358692e-92	-1.77056	0.013	0.111	3.16083558055777e-88	M1	CD300A
1.35707921089265e-92	-0.989224	0.035	0.154	3.19537870996783e-88	M1	STK38L
1.44924578752907e-92	-2.08558	0.013	0.111	3.41239413131595e-88	M1	PPP6R3
1.62812918638554e-92	-0.909544	0.032	0.148	3.83359298226339e-88	M1	CCDC12
1.75020256446625e-92	-0.524278	0.049	0.18	4.12102695829223e-88	M1	U2SURP
1.81063006655439e-92	-3.67802	0.004	0.091	4.26330955470898e-88	M1	LRRC8C
2.29733633744342e-92	-0.519491	0.086	0.242	5.40930814014427e-88	M1	DECR1
2.50660965548775e-92	-1.79841	0.016	0.117	5.90206309481145e-88	M1	TUT4
2.75868456387791e-92	-1.80771	0.011	0.106	6.49559867410694e-88	M1	TENT5A
2.86314926906126e-92	-0.666928	0.064	0.203	6.74157126893165e-88	M1	SP110
3.01439840815936e-92	-2.40581	0.007	0.099	7.09770249185202e-88	M1	LINC01578
3.2259325298282e-92	-0.37931	0.12	0.297	7.59578073473349e-88	M1	KCTD12
3.39304963186037e-92	-4.15568	0.002	0.087	7.98927466317842e-88	M1	ANTXR2
3.45126626139342e-92	-1.5924	0.017	0.12	8.12635153907695e-88	M1	SLC1A5
3.51440573946401e-92	-2.31714	0.008	0.1	8.27501975414195e-88	M1	TP53I13
4.99569631746315e-92	-0.741247	0.049	0.179	1.17628665490987e-87	M1	MYOF
5.85758145881211e-92	-1.54006	0.017	0.118	1.3792261302919e-87	M1	SCARB2
6.76859502586808e-92	-2.01252	0.013	0.11	1.5937333847909e-87	M1	NF1
7.03405183238068e-92	-1.1061	0.028	0.14	1.65623784445235e-87	M1	CTBS
7.035290385602e-92	-1.43528	0.016	0.117	1.65652947419385e-87	M1	RCOR1
7.16521831447456e-92	-0.560274	0.055	0.189	1.68712230432618e-87	M1	PNRC2
7.86106677466317e-92	-1.94599	0.016	0.116	1.85096678276219e-87	M1	FAM172A
7.87739270321834e-92	-3.59996	0.003	0.088	1.85481088589979e-87	M1	KCNK6
7.88508474100729e-92	-2.17763	0.011	0.107	1.85662205311758e-87	M1	ARAP2
8.05729848131468e-92	-0.437537	0.088	0.244	1.89717150041035e-87	M1	CTNNA1
9.00357752461946e-92	-0.52479	0.115	0.287	2.1199823639469e-87	M1	CD48
1.03555645510138e-91	-2.14024	0.015	0.114	2.43832122918171e-87	M1	IPCEF1
1.10311811903203e-91	-1.67093	0.018	0.119	2.59740192307281e-87	M1	BRWD1
1.13484557801727e-91	-2.14068	0.009	0.101	2.67210739799947e-87	M1	GON4L
1.17872193198635e-91	-2.9043	0.018	0.118	2.77541866105507e-87	M1	LTB
1.22006321439474e-91	-0.910677	0.044	0.169	2.87276084461386e-87	M1	IL16
1.23870340523981e-91	-1.57689	0.013	0.111	2.91665103797766e-87	M1	PPP1R10
1.73935342077428e-91	-0.848714	0.047	0.174	4.09548156455513e-87	M1	TERF2IP
1.80062247086766e-91	-2.04178	0.014	0.111	4.239745669905e-87	M1	MDM4
2.01890467332313e-91	-3.72705	0.004	0.089	4.75371294380665e-87	M1	ATAD2B
2.65580236338543e-91	-3.17261	0.005	0.092	6.25335224482732e-87	M1	REV3L
2.80811064519228e-91	-2.32492	0.009	0.102	6.61197732516974e-87	M1	INPP4A
2.98758661353865e-91	-2.4377	0.008	0.099	7.0345714402381e-87	M1	NLRP3
3.34232395620507e-91	-1.30313	0.02	0.123	7.86983598728045e-87	M1	USP9X
3.49038212605007e-91	-2.242	0.011	0.106	8.2184537539975e-87	M1	IGF2R
3.69756377389183e-91	-1.45246	0.02	0.123	8.70628366200571e-87	M1	SPAG9
4.10600620670436e-91	-1.94385	0.015	0.113	9.6680022143061e-87	M1	RHBDF2
4.62098069623097e-91	-0.360455	0.106	0.274	1.08805611473454e-86	M1	CSK
4.65958638060547e-91	-0.646956	0.04	0.163	1.09714620917736e-86	M1	ELOVL1
4.66213663034492e-91	-0.389763	0.157	0.35	1.09774669098101e-86	M1	CAPG
5.04239287249442e-91	-0.726693	0.052	0.183	1.18728182575754e-86	M1	UBE2K
6.6639203140526e-91	-1.39775	0.019	0.121	1.56908667714683e-86	M1	SECISBP2
7.35808704315436e-91	-2.06198	0.013	0.109	1.73253517518112e-86	M1	ARHGAP31
7.37360671807133e-91	-1.1085	0.025	0.134	1.73618943783708e-86	M1	FAM133B
8.19794199109715e-91	-0.345925	0.105	0.273	1.93028742122373e-86	M1	APPL1
9.8496490669042e-91	-0.580459	0.065	0.206	2.31919836929326e-86	M1	RILPL2
1.00303092305421e-90	-0.356792	0.134	0.316	2.36173661142344e-86	M1	PLEK
1.07585642058553e-90	-0.276741	0.149	0.344	2.53321152791068e-86	M1	NDUFC2
1.10143665513174e-90	-0.325635	0.192	0.409	2.59344274817319e-86	M1	RNH1
1.17042559621493e-90	-2.29834	0.009	0.101	2.75588410884768e-86	M1	PIGT
1.60157492209165e-90	-2.69013	0.007	0.098	3.771068311557e-86	M1	MAN1A2
1.61185016159507e-90	-1.65831	0.019	0.121	3.79526239049175e-86	M1	AXL
1.7078927441037e-90	-1.94068	0.011	0.105	4.02140425526658e-86	M1	DHRSX
1.87514696124093e-90	-3.23602	0.004	0.09	4.41522103493789e-86	M1	ATRN
1.93549517510875e-90	-1.99066	0.013	0.11	4.55731693931107e-86	M1	NUTM2B-AS1
2.20193876531206e-90	-1.32187	0.023	0.129	5.18468501680377e-86	M1	PDS5A
2.29898989226977e-90	-1.34055	0.022	0.128	5.41320160033841e-86	M1	CCAR1
2.30150588836817e-90	-2.04889	0.011	0.105	5.4191257647517e-86	M1	PTK2B
2.45356518945621e-90	-1.27115	0.03	0.143	5.77716459509359e-86	M1	RAPH1
2.74973313527712e-90	-1.61398	0.014	0.111	6.47452164032351e-86	M1	ERLEC1
3.21927346722281e-90	-1.36785	0.019	0.122	7.58010130592283e-86	M1	ITGB2-AS1
3.29392710609607e-90	-2.57502	0.006	0.093	7.7558807640138e-86	M1	RBM5
3.33852076479319e-90	-1.23525	0.043	0.165	7.86088099278203e-86	M1	SEPTIN9
3.87723504400038e-90	-1.06816	0.032	0.147	9.1293376346033e-86	M1	PBRM1
5.13426571956589e-90	-0.36196	0.081	0.232	1.20891420632898e-85	M1	DDX18
5.3204754581795e-90	-1.55894	0.019	0.121	1.25275915138294e-85	M1	PIK3CD
5.56866122029675e-90	-2.87959	0.004	0.089	1.31119697093107e-85	M1	TRPM7
5.57163100134173e-90	-0.981427	0.047	0.171	1.31189623557592e-85	M1	TRIM22
6.00309905609567e-90	-0.865804	0.041	0.163	1.41348970374829e-85	M1	EPRS
6.31066927158365e-90	-1.42168	0.017	0.117	1.48591018668709e-85	M1	ARHGEF10L
7.29318939790558e-90	-2.49838	0.009	0.099	1.71725437563085e-85	M1	FGD3
9.26040860006394e-90	-4.21507	0.002	0.085	2.18045580897105e-85	M1	LMBR1L
1.41041690647298e-89	-0.974344	0.032	0.145	3.32096764798129e-85	M1	CRLF3
1.72681218864522e-89	-1.3646	0.03	0.141	4.06595197938403e-85	M1	ARHGAP25
1.78321758350585e-89	-0.694525	0.052	0.181	4.19876412212287e-85	M1	CTNND1
2.08888072079164e-89	-3.31658	0.006	0.092	4.918478545176e-85	M1	STARD13
2.13086818462177e-89	-1.98462	0.01	0.103	5.01734222751042e-85	M1	ABHD16A
2.95327362225849e-89	-1.96211	0.015	0.112	6.95377807096984e-85	M1	TPK1
3.30168465878887e-89	-0.501792	0.115	0.284	7.77414669758427e-85	M1	FDFT1
3.47050969371329e-89	-1.51908	0.021	0.124	8.17166212481732e-85	M1	IL6ST
4.22886148314203e-89	-0.264869	0.175	0.383	9.95727724820622e-85	M1	CDC37
4.51391246585551e-89	-1.80383	0.018	0.117	1.06284582921034e-84	M1	TES
4.69152626044887e-89	-0.219566	0.109	0.279	1.10466677328529e-84	M1	RAB2A
5.18566088793613e-89	-0.439223	0.082	0.232	1.22101571267344e-84	M1	RNPS1
5.18682559611953e-89	-1.48205	0.015	0.112	1.2212899548623e-84	M1	TMEM205
6.61144597561209e-89	-3.73668	0.003	0.087	1.55673106941762e-84	M1	TAP1
7.27212419538405e-89	-1.16307	0.029	0.139	1.71229436304513e-84	M1	TENT2
7.6227495368134e-89	-1.14991	0.027	0.135	1.79485260593808e-84	M1	TBL1XR1
8.07149299616688e-89	-1.23103	0.019	0.12	1.90051374087745e-84	M1	ZNF24
8.2415672534541e-89	-0.671289	0.058	0.191	1.9405594254983e-84	M1	DEF6
8.99498141015244e-89	-0.513436	0.052	0.181	2.11795832283449e-84	M1	PRKCD
1.04240161273813e-88	-1.41864	0.018	0.118	2.4544388373532e-84	M1	GRK2
1.09722343923566e-88	-0.368792	0.092	0.25	2.58352231002428e-84	M1	UBE2B
1.13736053015932e-88	-2.4147	0.01	0.101	2.67802910431313e-84	M1	TRAPPC9
1.1958356604755e-88	-1.17401	0.034	0.147	2.81571464615562e-84	M1	RAP1GDS1
1.3135978762092e-88	-1.94563	0.014	0.11	3.09299755932219e-84	M1	ZCCHC7
1.55066497957049e-88	-1.65612	0.02	0.12	3.65119576089668e-84	M1	SPTAN1
1.57798009323811e-88	-1.16847	0.021	0.124	3.71551192753845e-84	M1	RASSF1
1.93700406827873e-88	-3.08046	0.004	0.089	4.5608697791691e-84	M1	CDK13
1.97492675417198e-88	-0.788922	0.038	0.156	4.65016253537335e-84	M1	ZFR
1.9946755041926e-88	-2.37999	0.008	0.096	4.69666294217188e-84	M1	MLLT10
2.14531123544611e-88	-0.522028	0.088	0.24	5.05134983498141e-84	M1	STX7
2.73965770673739e-88	-1.46751	0.021	0.124	6.45079803628385e-84	M1	PTPN1
3.01697843854026e-88	-2.858	0.004	0.088	7.10377743138689e-84	M1	NFAM1
3.389988016465e-88	-3.14631	0.005	0.089	7.98206578356849e-84	M1	FBXL17
3.39074056481038e-88	0.44195	0.843	0.816	7.98383773390252e-84	M1	GABARAP
4.13600034124901e-88	-0.610118	0.065	0.202	9.73862640350492e-84	M1	ILF3
4.35851864455828e-88	-1.10434	0.032	0.143	1.02625680004769e-83	M1	TNKS2
4.50237748801598e-88	-1.09947	0.031	0.142	1.06012980332824e-83	M1	SMARCC2
4.82771967778198e-88	-2.89079	0.005	0.09	1.13673487533055e-83	M1	CEP85L
5.07659374212118e-88	-1.64109	0.015	0.112	1.19533476251985e-83	M1	REEP3
5.50059531754858e-88	-0.406941	0.368	0.63	1.29517017346999e-83	M1	HNRNPA2B1
8.19383652652722e-88	-1.88728	0.012	0.105	1.9293207485361e-83	M1	ASXL2
8.91073510760959e-88	-2.207	0.008	0.097	2.09812168843775e-83	M1	CREBRF
8.93539091579563e-88	-1.49677	0.016	0.112	2.10392714503324e-83	M1	GNPTAB
1.01213247231957e-87	-4.48776	0.002	0.083	2.38316711932365e-83	M1	AUTS2
1.12627271194384e-87	-0.804566	0.038	0.155	2.65192172754297e-83	M1	RTF1
1.29090909836842e-87	-2.43488	0.008	0.096	3.03957456301828e-83	M1	TMC6
1.31092543915015e-87	-2.66005	0.006	0.091	3.08670503902295e-83	M1	RUFY3
1.70719385356061e-87	-2.66002	0.006	0.091	4.01975864759381e-83	M1	WDFY3
1.83231266099267e-87	-2.72493	0.005	0.089	4.31436339157335e-83	M1	DOP1B
2.06447522753285e-87	-1.73791	0.013	0.106	4.86101337074886e-83	M1	FOXO3
2.21193073457943e-87	-1.85818	0.014	0.107	5.20821210764073e-83	M1	PHC3
2.29677690356858e-87	-1.5542	0.014	0.109	5.40799089714257e-83	M1	NRIP1
2.54933040932353e-87	-2.59452	0.007	0.093	6.00265338179318e-83	M1	TNFAIP2
2.72474394296008e-87	-5.14165	0.001	0.081	6.41568208809381e-83	M1	NFKBIZ
2.73384573743881e-87	-1.61675	0.012	0.104	6.43711317337343e-83	M1	ARID4A
3.02778923884213e-87	-3.70035	0.003	0.084	7.12923254177767e-83	M1	EHBP1L1
3.09254159471078e-87	-1.67778	0.014	0.109	7.281698438906e-83	M1	ZNF217
3.19611729010123e-87	-1.31337	0.025	0.13	7.52557777127235e-83	M1	CCM2
3.64671715808245e-87	-0.82053	0.034	0.147	8.58656022042094e-83	M1	IKBIP
3.66674878519135e-87	-1.16257	0.029	0.137	8.63372668961155e-83	M1	LONP2
3.8544585985861e-87	-1.29028	0.019	0.118	9.07570821623082e-83	M1	DDRGK1
4.1095333398613e-87	-1.10815	0.03	0.14	9.67630720203743e-83	M1	GPAA1
4.26858429844894e-87	-1.1089	0.028	0.135	1.00508085891279e-82	M1	ARHGEF2
4.33696467576714e-87	-2.13134	0.007	0.093	1.02118170255613e-82	M1	COLGALT1
5.19734017963147e-87	-3.63369	0.003	0.085	1.22376571869603e-82	M1	ZNF710
5.78524866142907e-87	-1.59532	0.015	0.11	1.36219464982009e-82	M1	KIAA0100
6.08667943993967e-87	-1.67254	0.012	0.105	1.4331695409282e-82	M1	YIPF4
6.602434588704e-87	-1.38603	0.025	0.129	1.55460924825624e-82	M1	CYLD
8.91144004998171e-87	-1.47299	0.013	0.106	2.09828767416869e-82	M1	IARS2
9.14834127020296e-87	-0.328377	0.109	0.274	2.15406843548199e-82	M1	ATP6V0D1
1.01572419717362e-86	-0.863572	0.034	0.146	2.391624194665e-82	M1	MRPS5
1.09407218290939e-86	-0.435495	0.093	0.247	2.57610236187845e-82	M1	PAXX
1.17325000356201e-86	-2.48326	0.007	0.094	2.7625344583871e-82	M1	ATP6V0A1
1.21368743955072e-86	-4.68644	0.001	0.08	2.85774844516612e-82	M1	ITGA5
1.22610417721592e-86	-0.966293	0.048	0.17	2.8869848956726e-82	M1	PDCD4
1.52532829415353e-86	-1.96993	0.012	0.104	3.59153800141391e-82	M1	SRGAP2B
1.52623666475944e-86	-1.45628	0.014	0.107	3.59367685084257e-82	M1	POLK
1.60471720525093e-86	-1.51003	0.021	0.121	3.77846713148384e-82	M1	SLC9A3R1
1.62878087319497e-86	-0.389458	0.216	0.43	3.83512744402488e-82	M1	CKLF
1.73368437173076e-86	-0.28624	0.231	0.46	4.08213322167724e-82	M1	ACTR2
1.85814467913342e-86	-2.13107	0.011	0.101	4.37518746148756e-82	M1	SYTL3
1.91164165420882e-86	-1.03894	0.027	0.133	4.50115143900009e-82	M1	CSNK1D
1.96868510847519e-86	-2.36521	0.008	0.096	4.63546595641567e-82	M1	ZFC3H1
1.99055347945358e-86	-0.64742	0.043	0.162	4.68695722272139e-82	M1	MTMR14
2.11555312655201e-86	-4.16533	0.002	0.081	4.98128139177937e-82	M1	RELCH
2.61115066359077e-86	-0.7553	0.036	0.151	6.14821535249083e-82	M1	SHOC2
3.03877790855461e-86	-1.54148	0.016	0.111	7.15510646348269e-82	M1	DNAJB12
3.44106733382008e-86	-1.57923	0.016	0.112	8.10233714421276e-82	M1	SPG11
4.06727230507209e-86	-0.545832	0.066	0.202	9.57679936952275e-82	M1	CTNNB1
4.92826185453989e-86	-0.451036	0.188	0.388	1.16040853626996e-81	M1	RAC2
4.96423239899904e-86	-1.61553	0.013	0.106	1.16887816066831e-81	M1	BAZ2A
5.20950159927989e-86	-1.71364	0.015	0.109	1.22662924656644e-81	M1	TMEM248
5.29380800041876e-86	-1.71124	0.015	0.108	1.2464800317786e-81	M1	UBR4
6.58229090473602e-86	-3.4642	0.056	0.173	1.54986621642914e-81	M1	S100A8
6.95040911038669e-86	-2.44656	0.022	0.121	1.63654332913165e-81	M1	IFITM1
8.4126571949096e-86	-5.3172	0.001	0.079	1.98084426311341e-81	M1	STIM2
8.70945923951927e-86	-2.12227	0.009	0.096	2.05072927253721e-81	M1	TM9SF3
1.00701637323725e-85	-1.96272	0.011	0.101	2.37112075242443e-81	M1	PHACTR4
1.05297451412053e-85	-1.53482	0.028	0.134	2.47933379094819e-81	M1	IRF7
1.38116844843241e-85	-1.64169	0.015	0.109	3.25209922867895e-81	M1	TGFBR1
1.54180359436007e-85	-0.425715	0.076	0.219	3.63033074328022e-81	M1	SCAND1
1.70136082466339e-85	-2.44798	0.007	0.093	4.00602419775241e-81	M1	TMEM50B
1.74345156949052e-85	-1.60287	0.014	0.106	4.10513106552239e-81	M1	DICER1
1.79990268729115e-85	-0.691318	0.058	0.188	4.23805086749574e-81	M1	ADAR
1.85435598095688e-85	-0.598925	0.047	0.169	4.36626659276107e-81	M1	MYD88
2.02609606965922e-85	-3.3626	0.022	0.118	4.77064580561961e-81	M1	IL32
2.10360341174297e-85	-1.86731	0.011	0.1	4.95314459329e-81	M1	PRDX4
2.14995807932012e-85	-1.11431	0.034	0.145	5.06229129356714e-81	M1	CCDC91
2.18225897547803e-85	-0.557715	0.058	0.188	5.13834698366057e-81	M1	RASSF4
2.5346125843062e-85	-2.92789	0.005	0.087	5.96799879100739e-81	M1	SH2D3C
2.68374319655329e-85	-0.320729	0.215	0.432	6.31914173060439e-81	M1	RAB31
2.6850226014639e-85	-1.43359	0.024	0.126	6.32215421740689e-81	M1	TBC1D9
2.72316764865306e-85	-0.893204	0.035	0.146	6.4119705455185e-81	M1	CDK5RAP3
3.1155463894027e-85	-2.82418	0.01	0.097	7.3358655284876e-81	M1	CST7
3.48443142720789e-85	-3.13819	0.003	0.084	8.20444223850369e-81	M1	TNRC6A
3.6458282747456e-85	-0.804009	0.034	0.146	8.58446725571599e-81	M1	ARRB1
3.7599746446068e-85	-1.12805	0.022	0.123	8.85323629819118e-81	M1	GPR108
3.89599962468126e-85	-0.363112	0.183	0.386	9.17352071627448e-81	M1	ALDH2
4.52814993773183e-85	-0.511812	0.131	0.304	1.06619818433834e-80	M1	H2AFV
4.75503049567959e-85	-2.23593	0.009	0.095	1.11961948051272e-80	M1	KDM3B
5.46736658781572e-85	-3.28507	0.004	0.085	1.28734613676709e-80	M1	ARIH1
5.79632175113594e-85	-1.03567	0.037	0.149	1.36480191952247e-80	M1	KIF2A
5.81063458139138e-85	-2.53329	0.012	0.101	1.36817201853441e-80	M1	FRMD4A
6.23365215693766e-85	-0.755768	0.04	0.156	1.46777573687254e-80	M1	RAB4B
6.6296047792211e-85	-0.477948	0.081	0.226	1.5610067413154e-80	M1	ATRAID
7.63436354389883e-85	-2.01344	0.011	0.1	1.79758724004642e-80	M1	STT3B
7.95994434382716e-85	-0.47265	0.073	0.212	1.87424849519754e-80	M1	PPP1CB
8.68362480012425e-85	-2.65641	0.005	0.087	2.04464629543726e-80	M1	AKAP10
8.68558805285179e-85	-3.13993	0.004	0.085	2.04510856292448e-80	M1	ADAM17
9.38022405338524e-85	-0.486604	0.138	0.314	2.20866755561009e-80	M1	PSMB9
1.04929025164945e-84	-0.801061	0.055	0.18	2.4706588265338e-80	M1	PIK3R1
1.12817390333613e-84	-2.45491	0.006	0.089	2.65639827279525e-80	M1	RBM33
1.26787865637268e-84	-2.43329	0.009	0.095	2.98534708429512e-80	M1	VPS13D
1.28263445855795e-84	-1.15857	0.022	0.123	3.02009109612054e-80	M1	MED10
1.313379949017e-84	-3.65992	0.003	0.083	3.09248442795543e-80	M1	SOS1
1.32869401555933e-84	-0.267463	0.166	0.363	3.12854292903599e-80	M1	WAS
1.33045617647173e-84	-2.09553	0.008	0.094	3.13269211312033e-80	M1	TSPAN14
1.34909393725111e-84	-0.519484	0.053	0.179	3.17657658465146e-80	M1	IMP3
1.36463497383281e-84	-2.12724	0.009	0.096	3.21316950938674e-80	M1	PDS5B
1.52897299525677e-84	-2.03107	0.011	0.099	3.6001198146316e-80	M1	NFATC3
1.65369683487392e-84	-3.13921	0.003	0.082	3.89379456739413e-80	M1	B3GNT5
1.70341795583759e-84	-3.72041	0.003	0.082	4.0108679188152e-80	M1	BTBD9
1.95146204513102e-84	-1.68945	0.014	0.105	4.59491253146551e-80	M1	PELI1
2.1996150080624e-84	-3.14076	0.004	0.085	5.17921349798374e-80	M1	ENTPD1-AS1
2.32076511173348e-84	-2.04256	0.007	0.092	5.46447353208766e-80	M1	ST3GAL6
2.44939872744001e-84	-1.05635	0.033	0.142	5.76735424363026e-80	M1	BABAM2
3.21263558715778e-84	-0.88514	0.032	0.14	7.56447175352172e-80	M1	GPR65
3.44985082281057e-84	-1.88143	0.013	0.103	8.12301874738977e-80	M1	ASCC3
3.94833572390364e-84	-0.64691	0.057	0.184	9.29675129550352e-80	M1	STAT3
4.23434713515232e-84	-1.93863	0.016	0.109	9.97019376442964e-80	M1	CDK6
4.29732011259332e-84	-1.74757	0.016	0.11	1.01184699371122e-79	M1	SCFD1
4.73393589627353e-84	-0.482057	0.057	0.186	1.11465254613657e-79	M1	WASHC1
5.07892286328923e-84	-0.702711	0.046	0.165	1.19588317739008e-79	M1	TRIM44
5.1797678483392e-84	-0.941373	0.031	0.138	1.21962813756995e-79	M1	RNF167
5.65860062570506e-84	-0.936618	0.033	0.141	1.33237410332851e-79	M1	RALA
5.79030611971066e-84	-2.61258	0.006	0.09	1.36338547894707e-79	M1	BMPR2
6.21206731336031e-84	-2.86893	0.005	0.086	1.46269336960382e-79	M1	SIRPB2
6.24044804855204e-84	-0.603379	0.043	0.16	1.46937589751206e-79	M1	VPS4B
7.03933052046133e-84	-1.22863	0.023	0.124	1.65748076434782e-79	M1	SAFB
7.58056995621963e-84	-4.27608	0.002	0.079	1.78492100189147e-79	M1	SLC39A11
7.82167087158231e-84	-1.24176	0.025	0.128	1.84169062342277e-79	M1	ZC3H13
7.93180111030127e-84	-1.87534	0.011	0.099	1.86762188943154e-79	M1	MFSD10
8.19540337835727e-84	-1.28313	0.018	0.113	1.929689679468e-79	M1	C6orf62
8.85631298632265e-84	-1.03314	0.032	0.139	2.08530745575953e-79	M1	CYB5R4
9.00120760048266e-84	-1.32424	0.023	0.123	2.11942434160965e-79	M1	ITCH
1.06296043598328e-83	-2.38226	0.008	0.093	2.50284664256624e-79	M1	GALNT2
1.15299577079256e-83	-1.86205	0.015	0.107	2.71484384190817e-79	M1	ADAM9
1.35890435186405e-83	-1.41139	0.018	0.113	3.1996761868991e-79	M1	NUFIP2
1.36797711335268e-83	-0.885455	0.029	0.133	3.22103891110021e-79	M1	REST
1.6756081139351e-83	-0.93266	0.044	0.16	3.94538686507158e-79	M1	MAP4
1.7260241573393e-83	-0.245327	0.082	0.228	4.06409648087111e-79	M1	BNIP2
1.77185531614664e-83	-2.45792	0.005	0.087	4.17201052739889e-79	M1	MAP3K3
1.81366151417511e-83	-3.86976	0.002	0.08	4.27044740127672e-79	M1	GARS-DT
1.81406957190162e-83	-0.340137	0.2	0.408	4.27140821399956e-79	M1	ERP29
1.89404491322519e-83	-2.58701	0.007	0.09	4.45971815268004e-79	M1	ARID2
2.00887858245048e-83	-2.67706	0.006	0.089	4.7301055102379e-79	M1	RREB1
2.01735148302291e-83	-0.418845	0.091	0.241	4.75005580192575e-79	M1	HNRNPR
2.12401558584628e-83	-1.69119	0.014	0.106	5.00120709843365e-79	M1	METTL7A
2.35351988837946e-83	-1.03592	0.022	0.121	5.54159792917828e-79	M1	OSBPL11
2.64612224213304e-83	-2.33485	0.01	0.097	6.23055943132645e-79	M1	FMNL2
2.784529655112e-83	-2.74216	0.007	0.091	6.55645352592672e-79	M1	PIP4K2A
2.83897806672528e-83	-3.33024	0.004	0.082	6.68465775591135e-79	M1	RPS6KA5
2.89447652850934e-83	-1.59567	0.014	0.104	6.8153344340281e-79	M1	DAPP1
2.90633566650637e-83	-1.74416	0.015	0.107	6.8432579603559e-79	M1	NT5C2
3.13536227255576e-83	-0.966367	0.032	0.139	7.3825240069598e-79	M1	DHX9
3.23155994711652e-83	-0.690562	0.049	0.169	7.60903105148056e-79	M1	PCMT1
3.46259400577921e-83	-3.17054	0.005	0.086	8.15302384600772e-79	M1	COLEC12
4.04000385762033e-83	-1.13074	0.028	0.131	9.51259308315284e-79	M1	PPHLN1
4.08609683741629e-83	-2.86592	0.005	0.087	9.6211236133804e-79	M1	AGO3
4.26900469285498e-83	-0.898207	0.04	0.153	1.00517984497963e-78	M1	BACH1
4.9775623754127e-83	-0.637726	0.188	0.384	1.17201683691468e-78	M1	H2AFZ
5.14495948915812e-83	-1.57295	0.012	0.101	1.21143216131717e-78	M1	PTPN12
5.81401841500606e-83	-1.04435	0.028	0.132	1.36896877599733e-78	M1	CNOT2
5.83447737683541e-83	-1.555	0.019	0.115	1.37378604314967e-78	M1	TLK1
6.04832923421518e-83	-2.35046	0.009	0.094	1.42413960148831e-78	M1	FAM135A
6.55563549950413e-83	-2.25724	0.009	0.094	1.54358993471324e-78	M1	OSTM1
7.06710106557492e-83	-1.32885	0.022	0.121	1.66401961690027e-78	M1	RASA1
7.09460297087485e-83	-3.34804	0.003	0.082	1.67049521552219e-78	M1	PLXNC1
8.69155872327487e-83	-4.03796	0.002	0.078	2.0465144169823e-78	M1	ADGRE2
9.0571321697111e-83	-0.965994	0.027	0.13	2.13259234068018e-78	M1	USP8
9.58202441899053e-83	-2.62796	0.005	0.084	2.25618346969551e-78	M1	CHST15
1.53221631975961e-82	-1.11778	0.026	0.128	3.60775654650599e-78	M1	GTF2B
1.6543072735677e-82	-1.28791	0.018	0.112	3.89523190634251e-78	M1	CTBP2
1.77462803040453e-82	-1.43174	0.019	0.114	4.1785391603905e-78	M1	POLR2A
2.0189734810849e-82	-0.598487	0.066	0.198	4.75387495856251e-78	M1	HNRNPUL1
2.34118920082946e-82	-1.65886	0.013	0.101	5.51256409227304e-78	M1	DMXL1
2.50688364650438e-82	-1.91945	0.01	0.096	5.90270823405922e-78	M1	UBR5
2.57133006890783e-82	-3.14179	0.005	0.085	6.05445378025037e-78	M1	LILRA5
2.68417351439453e-82	-2.50801	0.006	0.086	6.32015495699335e-78	M1	RNPC3
2.89063993554911e-82	-1.32043	0.02	0.115	6.80630079224392e-78	M1	MAP4K4
3.14733673127973e-82	-0.440462	0.069	0.203	7.41071906747125e-78	M1	LSM14A
3.44132659445017e-82	0.499911	0.771	0.766	8.10294759929238e-78	M1	ATP5MC2
3.65072973617652e-82	-3.67858	0.002	0.079	8.59600823680123e-78	M1	TRERF1
3.67890382521196e-82	-1.43262	0.016	0.108	8.66234694684409e-78	M1	OXR1
3.81571768739363e-82	-0.844565	0.052	0.173	8.98448886673705e-78	M1	BASP1
4.44542544968573e-82	-1.45645	0.048	0.163	1.046719876383e-77	M1	OLR1
4.51286404156974e-82	-3.67633	0.002	0.078	1.06259896722801e-77	M1	PTGER4
4.57549253468672e-82	-1.38836	0.024	0.123	1.07734547221734e-77	M1	PPP2R5C
5.66969573895661e-82	-1.23812	0.024	0.123	1.33498655869472e-77	M1	RASSF5
6.2345144241185e-82	-1.91764	0.01	0.095	1.46797876630294e-77	M1	SPTLC1
6.74788315454846e-82	-1.06351	0.032	0.138	1.58885656756998e-77	M1	RASGRP2
7.78472309961229e-82	-2.16271	0.013	0.101	1.83299090103471e-77	M1	EPB41
8.82341611979556e-82	-0.869167	0.037	0.147	2.07756155956706e-77	M1	SUMF2
8.82588075943213e-82	-1.25052	0.036	0.144	2.07814188361589e-77	M1	CLEC5A
1.22951773060385e-81	-0.512506	0.072	0.207	2.89502244847982e-77	M1	KDELR2
1.34318527184764e-81	-2.78257	0.006	0.086	3.16266404109245e-77	M1	USP25
1.39800264579349e-81	-1.33266	0.024	0.122	3.29173702978535e-77	M1	WDR33
1.497095319361e-81	-2.11799	0.007	0.089	3.52506063896741e-77	M1	SLC12A9
1.84134266439384e-81	-1.43155	0.017	0.109	4.33562543758173e-77	M1	DNAJC10
1.96412093490932e-81	-0.784889	0.034	0.141	4.62471915333748e-77	M1	RSRC1
1.97137743588194e-81	-2.53163	0.007	0.088	4.64180531052761e-77	M1	C6orf89
2.00567655706652e-81	-0.610873	0.059	0.185	4.72256602126882e-77	M1	CAB39
2.01944494032962e-81	-2.01874	0.008	0.09	4.75498505650012e-77	M1	MTHFR
2.23620888089759e-81	-0.822879	0.028	0.131	5.26537743096146e-77	M1	CEBPZ
2.40840968896395e-81	-2.5559	0.007	0.089	5.67084145363452e-77	M1	ANKS1A
2.55242755446464e-81	-0.290726	0.252	0.482	6.00994591974245e-77	M1	NCL
2.95147698413388e-81	0.615572	0.705	0.69	6.94954770684163e-77	M1	RPL27A
3.16074249439352e-81	-1.32474	0.016	0.108	7.44228427729897e-77	M1	ZMIZ1
3.55242606374416e-81	-0.925083	0.032	0.138	8.364542409692e-77	M1	PARP14
3.99294880138787e-81	-1.35753	0.017	0.11	9.40179724774788e-77	M1	USP32
4.78434188994966e-81	-1.31872	0.023	0.121	1.12652114140755e-76	M1	MORC3
4.85828465466943e-81	-0.818046	0.034	0.142	1.14393170478846e-76	M1	UBE2W
4.88757361679317e-81	-2.7068	0.005	0.083	1.15082808381012e-76	M1	SOS2
5.35639742495271e-81	-1.52402	0.016	0.107	1.26121733767936e-76	M1	TCERG1
5.43896131127085e-81	-2.30711	0.009	0.092	1.28065783035183e-76	M1	ACER3
5.4577745541445e-81	-1.15989	0.025	0.124	1.28508759651886e-76	M1	HSD17B12
5.55213427464949e-81	-0.459442	0.1	0.25	1.30730553630897e-76	M1	FRMD4B
6.17047546061183e-81	-2.48674	0.006	0.087	1.45290015195566e-76	M1	TRAK1
7.24964598751397e-81	-3.04546	0.004	0.082	1.70700164422004e-76	M1	SCAPER
7.3934051874841e-81	-3.32122	0.003	0.078	1.74085118544501e-76	M1	SNHG25
7.51410260894142e-81	-2.25735	0.013	0.099	1.76927060030135e-76	M1	LGMN
7.98959632052855e-81	-2.10705	0.008	0.09	1.88123034963165e-76	M1	APC
8.28737728500997e-81	-4.38361	0.002	0.076	1.95134585552845e-76	M1	NFKBID
8.6836436585664e-81	-3.47707	0.003	0.079	2.04465073584604e-76	M1	POR
9.2451839030411e-81	0.683535	0.527	0.393	2.17687100181006e-76	M1	APOC1
9.88316385389815e-81	-0.588214	0.053	0.175	2.32708976103886e-76	M1	VPS36
1.19893318440011e-80	-0.29482	0.085	0.228	2.8230080759885e-76	M1	DNAJC15
1.2266783878263e-80	-3.02687	0.004	0.081	2.8883369319758e-76	M1	PHTF2
1.27850058418402e-80	-3.06189	0.003	0.078	3.0103574755197e-76	M1	NBPF19
1.33366630850718e-80	-5.6716	0.001	0.073	3.14025069001101e-76	M1	CD300E
1.37975728435906e-80	-0.857927	0.043	0.157	3.24877650175183e-76	M1	ANAPC5
1.39230097865452e-80	-4.6994	0.001	0.074	3.27831188433994e-76	M1	ATP11A
1.42683786373124e-80	-1.57613	0.014	0.102	3.35963243394157e-76	M1	AMD1
1.46257795438576e-80	-2.75934	0.006	0.085	3.44378605139672e-76	M1	RICTOR
1.58449436261284e-80	-3.07052	0.006	0.085	3.73085042620819e-76	M1	ASPH
1.5953696152495e-80	-2.19351	0.01	0.094	3.75645729606648e-76	M1	DIP2B
1.6407810251524e-80	-1.50296	0.013	0.101	3.86338300182384e-76	M1	CRYBG1
1.74934722534858e-80	-2.13248	0.008	0.091	4.11901297680578e-76	M1	VPS8
1.77545245760597e-80	-1.49374	0.016	0.106	4.18048035667901e-76	M1	CUL5
1.94454776097729e-80	-1.66489	0.012	0.098	4.57863215799713e-76	M1	B3GAT3
2.25589113118938e-80	-2.24098	0.007	0.087	5.31172125749851e-76	M1	AGO4
2.78102504325618e-80	-2.08151	0.01	0.093	6.54820156685101e-76	M1	MIA2
3.16209738578604e-80	-1.04515	0.024	0.122	7.44547450457182e-76	M1	TSEN34
3.31293170104595e-80	-4.49822	0.002	0.075	7.8006289832828e-76	M1	HIP1
3.67283373413863e-80	-1.57591	0.017	0.107	8.64805431040282e-76	M1	CNOT4
3.69839756691779e-80	-2.26287	0.008	0.089	8.70824691106463e-76	M1	SURF4
3.73657664779467e-80	-2.54393	0.008	0.09	8.79814337489734e-76	M1	MYO1G
3.97700242435281e-80	-0.475923	0.07	0.202	9.36424990838114e-76	M1	PJA2
5.12351521075444e-80	-2.14647	0.007	0.088	1.20638289152424e-75	M1	PRDM2
5.7775747251152e-80	-1.2151	0.018	0.109	1.36038774477563e-75	M1	PRKAR2A
5.96255567713749e-80	-3.03804	0.005	0.083	1.40394335973879e-75	M1	RPS6KC1
6.12197361307138e-80	-1.0716	0.022	0.118	1.44147990693379e-75	M1	CREB1
7.63177132011585e-80	-1.59404	0.01	0.095	1.79697687503448e-75	M1	ZKSCAN1
7.90923344851847e-80	-0.910388	0.032	0.137	1.86230810778816e-75	M1	YIF1A
8.49261319300187e-80	-1.5661	0.014	0.103	1.99967070242422e-75	M1	ZNFX1
8.82540290312849e-80	-0.90124	0.034	0.139	2.07802936757063e-75	M1	EFCAB14
8.9730423996398e-80	-1.63011	0.016	0.106	2.11279256341919e-75	M1	GIGYF2
9.92872627817919e-80	-0.732979	0.051	0.17	2.33781788946007e-75	M1	SEC31A
1.12892693331129e-79	-0.735496	0.041	0.153	2.65817135717476e-75	M1	TMEM243
1.15246177698978e-79	-1.95156	0.012	0.097	2.71358650010015e-75	M1	FAM102B
1.23800413883404e-79	-0.658957	0.052	0.17	2.91500454529863e-75	M1	DDX6
1.35273526289508e-79	-3.37847	0.004	0.081	3.18515045001276e-75	M1	MAGT1
1.38916608386873e-79	-0.77858	0.339	0.547	3.27093046107732e-75	M1	SAT1
1.5497933745929e-79	-2.692	0.005	0.082	3.64914347981644e-75	M1	F11R
1.63288925845908e-79	0.566203	0.691	0.695	3.84480104796776e-75	M1	COX7C
1.64983578632076e-79	-0.783242	0.038	0.146	3.88470334247087e-75	M1	DNM2
1.66582735654087e-79	-2.13272	0.012	0.098	3.92235709371112e-75	M1	FADS2
1.82315723845589e-79	-1.66693	0.013	0.098	4.29280603366824e-75	M1	LARP4B
1.85511696640528e-79	-2.32934	0.007	0.087	4.36805840909788e-75	M1	RIC1
1.87908389045055e-79	-0.791993	0.041	0.152	4.42449092845486e-75	M1	TUBGCP2
1.93711882975839e-79	-2.48334	0.007	0.086	4.5611399965491e-75	M1	SIL1
2.00400425566711e-79	-0.691593	0.036	0.143	4.71862842039379e-75	M1	SIGLEC9
2.07427270017932e-79	-0.856859	0.039	0.148	4.88408249984222e-75	M1	HIPK3
2.20952462660359e-79	-0.560443	0.118	0.277	5.20254668580081e-75	M1	HSPA1A
2.2428339744051e-79	-2.92824	0.007	0.086	5.28097687613426e-75	M1	WWOX
2.26826916718778e-79	-5.24027	0.001	0.073	5.34086658106035e-75	M1	SLCO3A1
2.34864383764031e-79	-2.6854	0.005	0.082	5.53011678010788e-75	M1	KDM6A
2.52213801769307e-79	-0.910043	0.028	0.129	5.93862617646011e-75	M1	NUMA1
2.86753776260295e-79	0.532546	0.73	0.733	6.7519044158249e-75	M1	HNRNPA1
2.95587081164092e-79	-1.84902	0.012	0.097	6.95989341308971e-75	M1	RFTN1
3.10755588324938e-79	-1.10559	0.026	0.125	7.31705108269899e-75	M1	SEC11C
3.16890554439827e-79	-1.59104	0.016	0.105	7.46150499484017e-75	M1	TOR1AIP1
3.2688506305607e-79	-1.35967	0.022	0.118	7.69683569471822e-75	M1	MAP7D1
4.00704062593709e-79	-2.87072	0.004	0.079	9.43497785783148e-75	M1	FAM117B
4.09606035540482e-79	-0.721201	0.035	0.141	9.6445837128362e-75	M1	UBE2R2
4.19481928147528e-79	-1.18463	0.021	0.116	9.8771214801617e-75	M1	USP33
4.85961383759219e-79	-0.611507	0.048	0.164	1.14424467419946e-74	M1	ACSL4
5.53377330720539e-79	-2.02213	0.009	0.091	1.30298226291458e-74	M1	GALNT1
5.5716036774564e-79	-3.10021	0.004	0.08	1.31188980189388e-74	M1	ITGAL
6.11768954447639e-79	-2.14148	0.005	0.082	1.44047118014241e-74	M1	PER1
7.30154619482943e-79	-1.87846	0.012	0.097	1.71922206703454e-74	M1	GATAD2B
7.56581636330314e-79	-4.03656	0.002	0.075	1.78144712090336e-74	M1	CEMIP2
7.69398542045229e-79	-1.2346	0.019	0.111	1.8116258070997e-74	M1	NCOR2
8.06406042127571e-79	-2.46863	0.008	0.088	1.89876366679358e-74	M1	BCAS3
8.35319149720919e-79	-1.75484	0.013	0.098	1.96684246993288e-74	M1	DERL1
8.73811708776386e-79	-2.58662	0.008	0.089	2.05747704948488e-74	M1	CDKAL1
9.56454437536378e-79	-1.0625	0.034	0.139	2.25206761862315e-74	M1	RBL2
9.67862364682115e-79	-2.442	0.007	0.085	2.27892872388051e-74	M1	BICRAL
9.95135615434478e-79	-3.03585	0.005	0.083	2.34314632010202e-74	M1	MED13
1.08915645272478e-78	-0.948538	0.024	0.12	2.56452778358578e-74	M1	CCDC107
1.09285351677742e-78	-1.09959	0.021	0.114	2.57323289060411e-74	M1	CDC40
1.15561644077431e-78	-1.70072	0.011	0.094	2.72101447144719e-74	M1	HSPA6
1.40202140620467e-78	-1.77102	0.012	0.096	3.30119960304953e-74	M1	TMED7
1.56082805143758e-78	-0.781757	0.041	0.15	3.67512572991494e-74	M1	RIOK3
1.71234794454872e-78	-5.12599	0.001	0.072	4.03189447023441e-74	M1	MAP3K14
1.91862843860881e-78	-0.301879	0.111	0.267	4.5176025215483e-74	M1	RBM8A
2.01694453047763e-78	-2.43555	0.004	0.079	4.74909759146264e-74	M1	BICD2
2.21332534195029e-78	-5.26131	0.001	0.072	5.21149585015615e-74	M1	FLT3
2.37090153011879e-78	-1.18069	0.025	0.121	5.58252474281771e-74	M1	NEK7
2.48289605617423e-78	-1.15684	0.029	0.13	5.84622705386785e-74	M1	CAPN2
2.74018271554196e-78	-1.54501	0.013	0.099	6.45203422201511e-74	M1	MAPK14
2.74382600578831e-78	-1.65064	0.012	0.097	6.46061271322916e-74	M1	PPP4R3A
2.79415439632861e-78	-2.17679	0.01	0.093	6.57911594159534e-74	M1	GMDS-DT
2.9016023765665e-78	-0.464388	0.088	0.228	6.83211295586348e-74	M1	KPNB1
3.22593536823862e-78	-1.66687	0.014	0.101	7.59578741805465e-74	M1	AHR
3.92470294800387e-78	-4.39543	0.001	0.072	9.24110556136991e-74	M1	CD1D
4.01100649947141e-78	-2.42285	0.008	0.088	9.44431590365538e-74	M1	THADA
4.06051977497766e-78	-1.42769	0.017	0.106	9.56089986216241e-74	M1	SLC25A37
4.09975696334089e-78	-1.75827	0.011	0.095	9.65328774588246e-74	M1	SORT1
4.44741724219375e-78	-1.36275	0.019	0.11	1.04718886384694e-73	M1	MARS
4.53462648756032e-78	-0.379949	0.115	0.272	1.06772315276095e-73	M1	PSMB8
4.70032108159578e-78	-1.03122	0.027	0.125	1.10673760187254e-73	M1	FAR1
5.82126874570665e-78	-1.74187	0.013	0.097	1.37067593886409e-73	M1	ZFYVE16
6.4717914237144e-78	-2.33291	0.008	0.087	1.52384800862779e-73	M1	TM2D1
6.594724871913e-78	-1.56287	0.017	0.105	1.55279391834063e-73	M1	ARID5A
7.01265261634814e-78	-2.61692	0.005	0.081	1.65119918504533e-73	M1	SLC37A2
7.05625071474218e-78	-1.72536	0.018	0.108	1.66146479329319e-73	M1	NSMCE2
7.57171063678294e-78	-1.77411	0.013	0.098	1.78283498653691e-73	M1	CUL3
7.62586054601281e-78	-1.82161	0.012	0.096	1.79558512416418e-73	M1	DENND4C
8.22481658285123e-78	-2.2661	0.006	0.082	1.93661531259815e-73	M1	RDH11
9.25032041259703e-78	-1.4073	0.019	0.109	2.1780804443501e-73	M1	SECISBP2L
9.91273395556868e-78	-1.09124	0.024	0.119	2.3340523371782e-73	M1	RFC1
1.00838752575769e-77	-2.19497	0.01	0.092	2.37434926814906e-73	M1	UBXN11
1.11523180007976e-77	-1.04365	0.025	0.121	2.62592479646781e-73	M1	ERGIC1
1.14150375912421e-77	-1.87422	0.01	0.092	2.68778475123387e-73	M1	ATXN2
1.28620217554205e-77	-0.560871	0.06	0.182	3.02849164253132e-73	M1	CYB5R3
1.45575955386281e-77	-1.04355	0.032	0.134	3.42773144552537e-73	M1	PTEN
1.49375713421057e-77	0.483665	0.759	0.777	3.51720054821221e-73	M1	PCBP2
1.52420415111192e-77	-1.88037	0.016	0.103	3.58889109420813e-73	M1	RNASE2
1.62056303750088e-77	-1.55583	0.016	0.104	3.81577772809958e-73	M1	RNF4
1.73544859135899e-77	-2.421	0.007	0.085	4.08628725321388e-73	M1	CD93
1.89686805392121e-77	-0.504714	0.063	0.188	4.46636551976288e-73	M1	PSMD7
1.90455789319905e-77	-0.822178	0.035	0.14	4.48447201532648e-73	M1	MICAL1
2.0207514987864e-77	-0.244138	0.25	0.477	4.75806147904245e-73	M1	HNRNPK
2.44483192792506e-77	-2.50672	0.008	0.087	5.75660125749236e-73	M1	LY75
2.49524621324019e-77	-2.25886	0.007	0.084	5.87530673369535e-73	M1	ZNF592
2.71766670086165e-77	-0.62953	0.05	0.166	6.39901801384884e-73	M1	MAPK1IP1L
2.82103832134274e-77	-1.95569	0.01	0.091	6.64241683143362e-73	M1	STK3
3.16445594687825e-77	-0.622926	0.04	0.148	7.45102797251953e-73	M1	IRF5
3.39267057595275e-77	-2.83428	0.004	0.079	7.98838213813834e-73	M1	TM9SF4
3.55084433595272e-77	-3.46719	0.003	0.076	8.36081807343429e-73	M1	NR4A1
3.75532420032597e-77	-1.27223	0.021	0.113	8.84228636208753e-73	M1	FGD2
3.75708115052649e-77	-1.1093	0.026	0.123	8.84642327702968e-73	M1	SDF2L1
3.84184392737379e-77	-0.584495	0.048	0.161	9.04600571139431e-73	M1	PSENEN
4.02259860718129e-77	-0.601982	0.039	0.146	9.47161068046906e-73	M1	SLA
4.08756853572365e-77	-0.77116	0.026	0.124	9.6245888742149e-73	M1	TRIM8
4.46090589631703e-77	-1.35909	0.016	0.103	1.05036490234681e-72	M1	ZDHHC7
4.7402647394662e-77	-3.56184	0.002	0.074	1.11614273555471e-72	M1	IL27RA
4.77264041798198e-77	-2.08707	0.007	0.084	1.12376591281804e-72	M1	RNFT1
6.0683451400166e-77	-0.983875	0.035	0.138	1.42885254666831e-72	M1	NUTM2A-AS1
7.63808135522131e-77	0.769039	0.6	0.586	1.79846263590041e-72	M1	EIF3L
7.63871603994402e-77	-2.73306	0.004	0.078	1.79861207876522e-72	M1	RLF
7.79896027984878e-77	-1.23618	0.024	0.118	1.83634318749319e-72	M1	DGKZ
7.83354730829024e-77	-5.10297	0.001	0.072	1.84448704921002e-72	M1	P2RY8
7.93018532435103e-77	-1.38555	0.016	0.103	1.86724143647169e-72	M1	BCAP29
8.69517027753005e-77	-3.91555	0.004	0.078	2.04736479354723e-72	M1	UGCG
9.71125438700683e-77	-2.05622	0.007	0.084	2.28661195796463e-72	M1	PRR14L
1.01631936472201e-76	-0.398145	0.499	0.708	2.39302557617446e-72	M1	H3F3B
1.02635947811985e-76	-3.88332	0.002	0.073	2.416666027181e-72	M1	FBXL20
1.03653953840354e-76	-0.698499	0.059	0.179	2.44063599712498e-72	M1	JAZF1
1.09519974099713e-76	-2.40155	0.009	0.088	2.57875731015185e-72	M1	DDX60L
1.23917155146365e-76	-0.460918	0.052	0.17	2.9177533350763e-72	M1	FAM174C
1.50388339692208e-76	-0.970875	0.025	0.12	3.54104384639272e-72	M1	CCS
1.77545084656249e-76	-0.314966	0.162	0.343	4.18047656331604e-72	M1	HNRNPF
1.81639552184432e-76	-0.256447	0.141	0.313	4.27688489573464e-72	M1	HCK
1.82749745218017e-76	-2.78822	0.005	0.081	4.30302550090343e-72	M1	TMEM33
1.85462721480886e-76	-2.5754	0.005	0.08	4.36690523998894e-72	M1	KIAA2026
2.02811105234033e-76	-0.503353	0.065	0.19	4.77539028384055e-72	M1	SYNCRIP
2.18659614661909e-76	-1.01187	0.026	0.123	5.1485592868293e-72	M1	NSRP1
2.41138172299291e-76	-4.75824	0.001	0.072	5.6778394049591e-72	M1	CCSER1
2.55862087753701e-76	-1.64345	0.019	0.108	6.02452871824865e-72	M1	FHIT
2.59467896724114e-76	-1.96635	0.011	0.093	6.10943109626599e-72	M1	RABGAP1
2.67218100777016e-76	-2.0906	0.009	0.087	6.29191740089561e-72	M1	DMXL2
2.68401710457812e-76	-2.39833	0.006	0.082	6.31978667443965e-72	M1	THUMPD3-AS1
2.78589871160023e-76	-3.74125	0.002	0.073	6.55967710633391e-72	M1	PCNX1
2.984431566587e-76	-1.50414	0.012	0.095	7.02714256668575e-72	M1	HTT
3.08300326030812e-76	-1.10569	0.024	0.117	7.2592394767215e-72	M1	UFL1
3.12739320962102e-76	-0.561904	0.049	0.163	7.36376005137365e-72	M1	NR1H2
3.24059230027985e-76	-3.32063	0.003	0.076	7.63029863023893e-72	M1	NABP1
3.54041480972776e-76	-2.28588	0.009	0.088	8.33626071098498e-72	M1	TMX4
4.03741248851573e-76	-1.23007	0.024	0.118	9.50649144545914e-72	M1	NSMAF
4.91095799760415e-76	-0.620282	0.036	0.14	1.15633417011587e-71	M1	EAPP
5.0510152387209e-76	-1.14927	0.025	0.119	1.18931204810922e-71	M1	TPST2
5.10819625150863e-76	-2.95136	0.004	0.077	1.20277588938022e-71	M1	AC020656.1
6.561025719425e-76	-0.388721	0.087	0.225	1.54485911589581e-71	M1	MAT2A
6.89136217362249e-76	-0.322479	0.261	0.485	1.62264013740115e-71	M1	YWHAZ
7.79960642884235e-76	-0.483545	0.078	0.21	1.83649532973522e-71	M1	SND1
7.9896381425058e-76	-0.325509	0.095	0.239	1.88124019703442e-71	M1	KIF5B
8.98905322448979e-76	-2.191	0.006	0.082	2.11656247223837e-71	M1	RBM26
1.00854500358026e-75	-3.13377	0.004	0.076	2.37472006543009e-71	M1	SGMS1
1.09956926736727e-75	-0.66589	0.1	0.241	2.58904579694298e-71	M1	EPB41L3
1.13186487739493e-75	-1.30829	0.02	0.11	2.66508904031411e-71	M1	PPP2R5E
1.17033967613755e-75	-3.24081	0.005	0.079	2.75568180143347e-71	M1	RUNX2
1.49750748400316e-75	-2.99798	0.005	0.079	3.52603112183383e-71	M1	PIBF1
1.6229405957694e-75	-0.537342	0.048	0.161	3.82137592679863e-71	M1	CAPNS1
1.6737328116627e-75	1.20969	0.402	0.306	3.940971278341e-71	M1	GYPC
1.74289960806952e-75	-1.06258	0.026	0.121	4.10383141716049e-71	M1	MOB1B
1.79910236264709e-75	-1.77529	0.011	0.092	4.23616642308885e-71	M1	FILIP1L
1.84640011294042e-75	-1.37067	0.019	0.108	4.3475337059295e-71	M1	PSTPIP2
1.99109855584498e-75	-0.637861	0.049	0.161	4.68824065959258e-71	M1	LUC7L2
2.04206183333583e-75	-1.27725	0.014	0.099	4.80823879277255e-71	M1	SPECC1
2.06814523150508e-75	-0.753316	0.037	0.14	4.86965476210186e-71	M1	MAPK1
2.35253535956559e-75	-3.01995	0.003	0.075	5.53927975763314e-71	M1	KIAA0319L
2.42357719306169e-75	-0.565069	0.061	0.182	5.70655485878305e-71	M1	DNAJC7
2.54200279108745e-75	-3.15509	0.004	0.077	5.9853997718945e-71	M1	RALGAPA1
2.55070212672742e-75	-2.16455	0.007	0.083	6.00588322759238e-71	M1	PIP4P1
3.11480033238148e-75	-3.00806	0.004	0.077	7.33410886262543e-71	M1	SCAF8
3.43778183720486e-75	-2.23243	0.006	0.082	8.09460111388257e-71	M1	SPNS1
3.60389989628677e-75	-0.644713	0.044	0.153	8.48574269579682e-71	M1	SMAP1
3.68145826397931e-75	-2.67064	0.005	0.079	8.66836162836568e-71	M1	BANP
3.75300790700285e-75	-0.878964	0.029	0.125	8.83683241782891e-71	M1	SNRNP200
5.10695573547579e-75	-1.44027	0.018	0.106	1.20248379747513e-70	M1	POLR2B
5.60186572688089e-75	-0.539979	0.066	0.19	1.31901530405137e-70	M1	CALCOCO2
5.67671618698682e-75	-0.265434	0.081	0.216	1.33663959338792e-70	M1	CLEC2B
5.74846882633168e-75	-1.3433	0.019	0.108	1.35353446984806e-70	M1	MAD1L1
5.88724643856719e-75	-2.44931	0.006	0.08	1.38621104642503e-70	M1	MFSD14A
6.2260443297922e-75	-1.29545	0.021	0.111	1.46598439789287e-70	M1	PLCG2
6.34623501472237e-75	-0.725767	0.031	0.13	1.49428449656653e-70	M1	PPP4R2
6.34995128035132e-75	-3.99455	0.003	0.075	1.49515952847152e-70	M1	SLC7A5
6.98308782253944e-75	-5.90134	0.001	0.068	1.64423785869514e-70	M1	LINC01619
7.03616206034748e-75	-0.975101	0.028	0.123	1.65673471872942e-70	M1	BAZ1B
7.20112647736148e-75	-1.99328	0.013	0.094	1.69557724035953e-70	M1	GLS
9.05369411381754e-75	-4.7354	0.004	0.076	2.13178281603948e-70	M1	IL7R
9.54141249413843e-75	-1.81617	0.013	0.095	2.24662098586984e-70	M1	ARHGEF3
9.62525313364827e-75	-2.0438	0.007	0.083	2.26636210284882e-70	M1	SPG7
1.09889128458074e-74	-1.7928	0.011	0.091	2.58744941867381e-70	M1	TYK2
1.22857082504316e-74	-2.04867	0.009	0.086	2.89279286464663e-70	M1	CHD6
1.29405679719917e-74	-0.660079	0.048	0.16	3.04698613468517e-70	M1	WTAP
1.46126304155515e-74	-1.23433	0.021	0.111	3.44068995764575e-70	M1	RABEP1
1.62417213819746e-74	-1.88128	0.01	0.088	3.82427571659975e-70	M1	SRGAP2C
1.74800385074061e-74	-1.2717	0.02	0.109	4.11584986695383e-70	M1	RBM27
1.86139488610137e-74	-0.244291	0.07	0.198	4.38284039881428e-70	M1	EFHD2
1.93710192299678e-74	-1.55533	0.015	0.098	4.56110018788821e-70	M1	RGS14
2.23213902605147e-74	-1.25056	0.019	0.107	5.2557945507408e-70	M1	USP48
3.12947313766693e-74	-0.611346	0.032	0.132	7.36865744995056e-70	M1	FES
3.44329186459439e-74	-1.52832	0.013	0.095	8.10757502437396e-70	M1	SNX13
3.46156738917147e-74	-1.03347	0.026	0.119	8.15060657454313e-70	M1	ABHD12
3.51824551659908e-74	-2.33512	0.008	0.085	8.28406089338419e-70	M1	ZNF131
3.78952364034929e-74	-0.949727	0.023	0.114	8.92281236356645e-70	M1	TMEM208
4.46837095088521e-74	-3.60141	0.003	0.074	1.05212262409543e-69	M1	CLEC2D
4.92229854160984e-74	-2.47298	0.006	0.08	1.15900441460745e-69	M1	GANAB
5.42339439334508e-74	-4.99422	0.001	0.069	1.27699244385703e-69	M1	RAP1GAP2
5.44187546414874e-74	-3.97761	0.002	0.07	1.28134399678846e-69	M1	IL1R2
6.63865775270401e-74	-1.58405	0.01	0.089	1.56313835445169e-69	M1	CNIH4
6.86220433547636e-74	-0.818484	0.046	0.155	1.61577463283126e-69	M1	DNMT1
7.20848777385865e-74	-1.30586	0.02	0.109	1.69731053123276e-69	M1	CNOT1
7.54827678099612e-74	-1.22863	0.027	0.121	1.77731725085335e-69	M1	TMEM176A
8.13006673619149e-74	-0.358707	0.079	0.21	1.91430551370365e-69	M1	DNAJB6
8.39974621074407e-74	-1.04585	0.026	0.119	1.9778042427818e-69	M1	CLDND1
8.75527844349254e-74	-0.414831	0.066	0.19	2.06151786230475e-69	M1	SLC7A7
1.02625052837115e-73	-2.52552	0.006	0.08	2.41640949410272e-69	M1	KLF13
1.06372172074159e-73	-3.48286	0.003	0.073	2.50463916365815e-69	M1	DLG1
1.0846249044331e-73	-0.83409	0.026	0.12	2.55385779997818e-69	M1	PKN1
1.12651264673161e-73	-2.33786	0.007	0.081	2.65248667799425e-69	M1	DIP2A
1.13040371121917e-73	-0.20313	0.127	0.288	2.66164857843665e-69	M1	JTB
1.21866172927682e-73	-0.592096	0.045	0.153	2.86946090775521e-69	M1	SEC14L1
1.22428326496504e-73	-2.59768	0.005	0.076	2.88269737568668e-69	M1	TMUB2
1.22467508619282e-73	-0.475684	0.062	0.182	2.88361995794961e-69	M1	PLEKHB2
1.23094650402236e-73	-0.430104	0.075	0.203	2.89838663837105e-69	M1	ARHGAP4
1.27397867747721e-73	-0.277103	0.322	0.562	2.99971019398783e-69	M1	PKM
1.40744700901518e-73	-1.96943	0.008	0.083	3.31397472742715e-69	M1	JKAMP
1.5221670170161e-73	-1.15298	0.025	0.118	3.58409445826611e-69	M1	XAF1
1.52428156351694e-73	-0.772718	0.046	0.155	3.58907336945698e-69	M1	MCUB
1.57687445607402e-73	-3.08415	0.003	0.073	3.71290859427189e-69	M1	MFSD14C
1.69344596216154e-73	-2.33924	0.006	0.079	3.98738786250555e-69	M1	WBP1L
1.70705690941679e-73	-0.580474	0.053	0.166	4.01943619891276e-69	M1	NAIP
1.9857185824036e-73	-2.2115	0.01	0.087	4.67557297412752e-69	M1	DGKD
2.01594114312548e-73	-0.611082	0.055	0.17	4.74673501560326e-69	M1	PNPLA2
2.17663338562791e-73	-0.942252	0.029	0.124	5.12510096979947e-69	M1	MICU2
2.22946342509582e-73	-2.20362	0.006	0.08	5.24949458073061e-69	M1	UBE4A
2.27863557566663e-73	-1.21492	0.02	0.108	5.36527532646466e-69	M1	CALHM2
2.36209218000625e-73	-2.15361	0.008	0.084	5.56178224704272e-69	M1	HMBOX1
2.46248700437778e-73	-1.38946	0.016	0.1	5.79817190050791e-69	M1	VEZF1
2.72041393229655e-73	-1.62004	0.011	0.09	6.40548664498547e-69	M1	ADIPOR2
2.76712131582633e-73	-0.796439	0.032	0.13	6.51546385024467e-69	M1	ARAP1
2.80704012262994e-73	-0.31497	0.096	0.237	6.60945667274446e-69	M1	VCP
2.98499726243371e-73	-0.510132	0.056	0.171	7.0284745541264e-69	M1	TAF1D
3.45512291170045e-73	-0.586402	0.052	0.165	8.13543240788987e-69	M1	CTDSP1
3.61286480897619e-73	-1.20545	0.023	0.114	8.50685147921533e-69	M1	RIN2
4.11917568913725e-73	-1.11133	0.043	0.147	9.69901107764257e-69	M1	SLC2A5
4.30008728812884e-73	-1.4639	0.016	0.099	1.01249855286282e-68	M1	DNAJB11
4.30616554944615e-73	-4.01902	0.002	0.07	1.01392974027259e-68	M1	ATP11B
4.38879541422478e-73	-1.98526	0.008	0.084	1.03338576823337e-68	M1	ALG5
4.501987346831e-73	-0.188394	0.11	0.262	1.06003794068483e-68	M1	PPP4C
4.52147043480934e-73	-2.00921	0.009	0.085	1.06462542858021e-68	M1	STT3A
4.70124367973922e-73	-2.17596	0.008	0.083	1.1069548368314e-68	M1	LMF2
5.00517873129263e-73	-0.933926	0.022	0.111	1.17851938407016e-68	M1	AGGF1
5.10491844134478e-73	-2.03548	0.008	0.083	1.20200409619904e-68	M1	ZNF518A
5.53125474554035e-73	-2.70738	0.004	0.075	1.30238924238493e-68	M1	CLCN3
5.61907852080762e-73	-1.32603	0.017	0.101	1.32306822850936e-68	M1	STX11
5.70503398186464e-73	-3.1846	0.003	0.072	1.34330730136985e-68	M1	SEL1L3
5.9119633182565e-73	-0.242901	0.09	0.228	1.39203088291668e-68	M1	NDUFS2
6.64242572029922e-73	-0.363833	0.103	0.247	1.56402556010165e-68	M1	EWSR1
7.4861607284622e-73	-1.17152	0.019	0.105	1.76269140512371e-68	M1	PPP1R21
7.92977018787706e-73	-0.295094	0.322	0.565	1.86714368843753e-68	M1	HCLS1
9.33359237272374e-73	-0.197407	0.219	0.429	2.19768766008153e-68	M1	GNAS
9.99123792484325e-73	-0.239327	0.108	0.257	2.35253688178359e-68	M1	APH1A
1.05420205802687e-72	-1.29527	0.02	0.108	2.48222416583006e-68	M1	ZBTB38
1.41010209564434e-72	-2.75969	0.006	0.079	3.32022639440416e-68	M1	SMYD3
1.47856013563673e-72	-1.52203	0.014	0.096	3.48141769537025e-68	M1	TLE4
1.66155777786066e-72	-0.424601	0.093	0.231	3.91230394375071e-68	M1	CASP1
1.82913096617704e-72	-1.68559	0.014	0.094	4.30687177296046e-68	M1	PDE4DIP
1.83617032583194e-72	-2.18053	0.009	0.085	4.32344664920389e-68	M1	PI4KA
2.05144046217748e-72	-0.512581	0.072	0.197	4.8303217122431e-68	M1	FDPS
2.24706031729007e-72	-1.78277	0.01	0.087	5.2909282230912e-68	M1	MCOLN1
2.3150524608569e-72	-2.75132	0.004	0.073	5.45102252433365e-68	M1	HRH2
2.57507571780995e-72	-5.99428	0.001	0.066	6.0632732851553e-68	M1	CD36
2.66338353014888e-72	-1.99319	0.01	0.086	6.27120286008855e-68	M1	RABGEF1
2.99689788185834e-72	-1.67722	0.012	0.091	7.05649575262364e-68	M1	TRPV2
4.02664234528813e-72	-0.949557	0.042	0.145	9.48113206621543e-68	M1	SAMSN1
4.07195339336708e-72	-1.63598	0.014	0.095	9.58782146002214e-68	M1	DENND1B
4.13573913125733e-72	-2.29411	0.006	0.079	9.73801135845851e-68	M1	SLC43A3
4.58103931726774e-72	-0.691036	0.031	0.127	1.07865151764386e-67	M1	SASH3
4.75581177685198e-72	-1.02785	0.023	0.113	1.11980344097757e-67	M1	TRIM27
4.82130982934032e-72	-2.01913	0.01	0.086	1.13522561241647e-67	M1	LCORL
4.86362671737321e-72	-0.62325	0.058	0.172	1.1451895468727e-67	M1	ABI1
4.94995127785162e-72	-2.32044	0.005	0.076	1.16551552788294e-67	M1	SLC31A2
5.28066047430636e-72	-1.14092	0.019	0.104	1.24338431528018e-67	M1	MANF
5.41837107382486e-72	-0.164997	0.143	0.311	1.2758096530428e-67	M1	TCEA1
5.80766627738356e-72	-0.328188	0.091	0.228	1.36747310167273e-67	M1	PRKAR1A
5.98392815023936e-72	-0.803574	0.041	0.144	1.40897572225536e-67	M1	YME1L1
6.03772705168528e-72	-1.84953	0.009	0.084	1.42164321158982e-67	M1	LUC7L
6.20281481557083e-72	-3.47325	0.003	0.071	1.46051477647431e-67	M1	MICAL2
6.42152202494689e-72	-3.12879	0.003	0.072	1.512011575994e-67	M1	ATR
6.80551118726062e-72	-0.147636	0.145	0.314	1.60242566415239e-67	M1	SKAP2
8.2142706465647e-72	-0.876649	0.037	0.137	1.93413216644012e-67	M1	PSIP1
8.30973667195142e-72	-1.73629	0.01	0.086	1.95661059677768e-67	M1	TRIP11
8.36959373919251e-72	-0.563679	0.06	0.176	1.97070454183027e-67	M1	IK
8.71672973786701e-72	-3.71016	0.002	0.069	2.05244118407817e-67	M1	SEMA4A
8.86926075556101e-72	-0.760757	0.031	0.128	2.08835613750439e-67	M1	GINM1
9.05723379309914e-72	-2.30534	0.006	0.079	2.13261626892312e-67	M1	LRRC8D
9.08973093525056e-72	-1.40933	0.013	0.093	2.1402680460141e-67	M1	NFX1
9.29558032720294e-72	-1.64985	0.013	0.092	2.1887373438432e-67	M1	DPEP2
9.67416226866143e-72	-0.950016	0.059	0.171	2.27787824777902e-67	M1	CYP27A1
9.71578600163926e-72	-1.05562	0.021	0.107	2.28767897194598e-67	M1	TRPC4AP
9.89391602200748e-72	-1.26912	0.019	0.105	2.32962146654188e-67	M1	ATXN3
1.0220454296226e-71	-1.7313	0.01	0.087	2.40650816858938e-67	M1	MARCH6
1.12323810953649e-71	-2.59919	0.004	0.074	2.64477645271462e-67	M1	FAM118A
1.27843949455516e-71	-1.17441	0.017	0.1	3.01021363387957e-67	M1	PDE4A
1.31540750864439e-71	-0.330943	0.091	0.226	3.09725851985408e-67	M1	RBBP4
1.41304266713566e-71	-2.52007	0.005	0.076	3.32715026403761e-67	M1	C15orf39
1.43183792519386e-71	-3.64148	0.002	0.068	3.37140557866147e-67	M1	MOB3B
1.55368339242446e-71	-1.35139	0.017	0.1	3.65830291580262e-67	M1	WDR82
1.74979864300914e-71	-0.177737	0.125	0.282	4.12007588482933e-67	M1	EIF2S2
1.76107537792719e-71	-1.02806	0.022	0.111	4.14662808486736e-67	M1	STAT2
1.91272505568691e-71	-2.0566	0.013	0.093	4.5037024161204e-67	M1	ITM2C
1.93039785670739e-71	-1.33954	0.025	0.114	4.54531479340323e-67	M1	MX2
1.93414205363394e-71	-0.508888	0.04	0.142	4.55413087948647e-67	M1	WIPI2
2.0227280347821e-71	-1.20484	0.02	0.106	4.76271543069794e-67	M1	ANKRD10
2.03852893367302e-71	-0.531506	0.058	0.173	4.7999202272265e-67	M1	MVP
2.05494580082355e-71	-1.19853	0.02	0.105	4.83857538261912e-67	M1	DDX42
2.39391395428961e-71	-2.45345	0.005	0.074	5.63670979677033e-67	M1	USP24
2.77094604936107e-71	-1.56681	0.015	0.096	6.52446956782558e-67	M1	TM7SF3
2.95315881751343e-71	-2.62314	0.007	0.079	6.95350775171713e-67	M1	RNF19A
3.02736341878879e-71	-2.70629	0.004	0.073	7.12822990588009e-67	M1	ERAP2
3.10397313748218e-71	-4.00527	0.003	0.07	7.30861514951555e-67	M1	ACAP1
4.05241629152833e-71	-1.95288	0.008	0.082	9.5418194000326e-67	M1	ANKRD13D
4.32879689146786e-71	-0.614757	0.051	0.161	1.01925851606502e-66	M1	DDX39A
4.42910448018978e-71	-3.64984	0.002	0.069	1.04287694090549e-66	M1	APOBR
4.70914844702615e-71	-2.84771	0.005	0.074	1.10881609333678e-66	M1	BTAF1
5.08382063900844e-71	-0.23117	0.127	0.285	1.19703640766093e-66	M1	NDUFB9
5.15063324885346e-71	-3.21312	0.002	0.069	1.21276810477504e-66	M1	ARID3A
5.38120637893471e-71	-1.0956	0.028	0.12	1.26705885398397e-66	M1	PPP4R3B
5.53666928337177e-71	-1.03015	0.024	0.113	1.30366414946272e-66	M1	FIP1L1
5.59787408764193e-71	-1.62155	0.013	0.091	1.31807543267617e-66	M1	PPM1B
5.8877040254069e-71	-1.80733	0.008	0.082	1.38631878982231e-66	M1	MTF2
5.89850421699887e-71	-0.547866	0.044	0.149	1.38886180293455e-66	M1	UBA2
6.08887608610129e-71	-2.97615	0.005	0.075	1.43368676323341e-66	M1	PRKCA
6.24506234987493e-71	-0.168423	0.133	0.294	1.47046238090155e-66	M1	ZNF706
6.4692801512862e-71	-1.01857	0.028	0.119	1.52325670442185e-66	M1	CPED1
6.86786024273705e-71	-1.3993	0.013	0.092	1.61710637275487e-66	M1	CHD8
6.88447987418492e-71	-2.02677	0.011	0.087	1.62101963117558e-66	M1	KCNAB2
6.98403316979213e-71	-1.40151	0.015	0.096	1.64446045015925e-66	M1	PSMB8-AS1
7.86235691662721e-71	-4.54395	0.001	0.066	1.85127055958904e-66	M1	FOSL2
7.8984856460866e-71	-0.574973	0.04	0.142	1.85977743022755e-66	M1	ARHGAP9
8.63358274412522e-71	-1.91067	0.01	0.085	2.03286339293172e-66	M1	FOXJ3
9.17192804421341e-71	-2.0442	0.009	0.084	2.15962217729049e-66	M1	SEC24B
9.43800525451867e-71	0.608091	0.703	0.701	2.22227271722897e-66	M1	CALM2
9.459522929316e-71	-1.69972	0.015	0.096	2.22733926893675e-66	M1	DLEU1
1.07242382538683e-70	-3.70234	0.002	0.069	2.52512913925583e-66	M1	ATP10D
1.21172935489915e-70	-1.64095	0.013	0.091	2.85313793904553e-66	M1	CLPTM1
1.23773527758622e-70	-2.08522	0.007	0.08	2.9143714846045e-66	M1	TDG
1.28369508637561e-70	-1.40957	0.013	0.092	3.02258845038001e-66	M1	KDM7A
1.35148407481838e-70	-0.592813	0.045	0.15	3.18220440256737e-66	M1	CDV3
1.3737652641644e-70	-1.99076	0.007	0.078	3.23466769100149e-66	M1	ARRDC2
1.45266460620289e-70	-0.978962	0.022	0.109	3.42044408176533e-66	M1	RBM23
1.47325160013019e-70	-2.08608	0.007	0.078	3.46891821766655e-66	M1	TASOR2
1.50067313819426e-70	-2.81578	0.006	0.078	3.53348497119221e-66	M1	P2RY14
1.55823662567845e-70	-2.45357	0.005	0.075	3.66902395882248e-66	M1	SIRPB1
1.59726249747102e-70	-0.758292	0.06	0.174	3.76091427654526e-66	M1	JPT1
1.67430224109944e-70	-1.04384	0.025	0.115	3.94231205689275e-66	M1	TPP2
1.83586460623028e-70	-0.193032	0.108	0.254	4.32272680182982e-66	M1	CHURC1
1.84128868273212e-70	-2.61135	0.005	0.074	4.33549833236105e-66	M1	MYO9A
2.12682437434687e-70	-2.86583	0.004	0.072	5.00782067183714e-66	M1	PCNX4
2.14106124136589e-70	-0.133334	0.155	0.329	5.04134279892011e-66	M1	MTPN
2.1442871972327e-70	-2.56976	0.006	0.076	5.04893863460411e-66	M1	CALU
2.1793461199941e-70	-0.686548	0.038	0.138	5.13148837413812e-66	M1	MPG
2.20344814632604e-70	-1.52037	0.012	0.09	5.1882390053393e-66	M1	KMT5B
2.21589567701536e-70	-1.64335	0.026	0.115	5.21754796110037e-66	M1	PID1
2.38822893697781e-70	-0.185444	0.117	0.268	5.62332385500795e-66	M1	SSB
2.58846909300246e-70	-2.13968	0.007	0.079	6.0948093263836e-66	M1	PCF11
2.77492613355575e-70	-0.836719	0.025	0.115	6.53384107407038e-66	M1	CIAO1
2.81160192886074e-70	-1.93598	0.012	0.089	6.6201979016955e-66	M1	PBX3
2.88713963668933e-70	-0.580164	0.042	0.144	6.79805898854869e-66	M1	AKIRIN2
3.60691604555944e-70	-0.333163	0.058	0.173	8.49284452087426e-66	M1	RALBP1
3.61483578154377e-70	-0.993246	0.024	0.113	8.51149233122296e-66	M1	TMF1
3.78347428016576e-70	-2.08848	0.009	0.082	8.90856854007829e-66	M1	CNST
3.8206880428438e-70	-0.966974	0.08	0.201	8.99619206568002e-66	M1	FOLR2
4.01258916300613e-70	-3.94735	0.002	0.068	9.44804244321424e-66	M1	RGS1
4.74670232604229e-70	-2.87705	0.004	0.072	1.11765852968992e-65	M1	CSGALNACT2
5.10107909135294e-70	-0.456584	0.067	0.187	1.20110008284996e-65	M1	RSU1
5.16165352643648e-70	-1.84878	0.005	0.075	1.21536293933473e-65	M1	SERTAD3
5.19886223808952e-70	-1.97088	0.009	0.083	1.22412410258056e-65	M1	BRAF
5.30775124658733e-70	-1.43372	0.016	0.098	1.24976310852145e-65	M1	KLHL24
5.54767508014454e-70	-0.439431	0.04	0.141	1.30625557437083e-65	M1	LACTB
6.16033835458573e-70	-3.42529	0.003	0.07	1.45051326897076e-65	M1	HMGCR
6.19685988361261e-70	-1.52064	0.013	0.09	1.45911262819543e-65	M1	IQSEC1
6.3352450400179e-70	-0.873831	0.032	0.127	1.49169679712261e-65	M1	CTTNBP2NL
6.43185953113321e-70	-0.827104	0.029	0.121	1.51444564520062e-65	M1	PRKX
6.5855129614161e-70	-2.70617	0.004	0.073	1.55062488189504e-65	M1	DYRK1A
6.87631912683769e-70	-1.61053	0.013	0.091	1.6190981016052e-65	M1	UNC50
6.98153348158779e-70	-2.85192	0.007	0.077	1.64387187357466e-65	M1	PLAC8
7.04862579096655e-70	-1.44689	0.015	0.095	1.65966942874098e-65	M1	SMC5
7.60840849305022e-70	-0.754698	0.049	0.155	1.79147586377361e-65	M1	MAFB
7.70056614328593e-70	-1.10689	0.02	0.104	1.8131753040981e-65	M1	RNF115
8.57649994719596e-70	-1.62285	0.015	0.095	2.01942267756676e-65	M1	CNOT6L
1.00230389232304e-69	-0.8104	0.026	0.116	2.36002474486383e-65	M1	DOK1
1.12381157903915e-69	-1.81369	0.008	0.081	2.64612674400559e-65	M1	LINC01504
1.19820041627051e-69	-1.07058	0.021	0.106	2.82128270015054e-65	M1	ATXN2L
1.21758794553378e-69	-1.70441	0.009	0.082	2.86693257655384e-65	M1	C5orf15
1.26382071648503e-69	-1.45762	0.013	0.09	2.97579225903566e-65	M1	STARD3
1.45848979308183e-69	-2.11267	0.007	0.078	3.43416006679048e-65	M1	COX19
1.57424251138148e-69	-1.73175	0.01	0.085	3.70671141729883e-65	M1	ANKIB1
1.609694763021e-69	0.272927	0.949	0.924	3.79018728900926e-65	M1	GAPDH
1.78952840976808e-69	-0.28785	0.226	0.427	4.21362359363991e-65	M1	NAP1L1
1.87801161178508e-69	-1.22007	0.018	0.1	4.42196614110915e-65	M1	GSAP
1.93370608826077e-69	-1.66193	0.009	0.083	4.55310435541881e-65	M1	CHIC2
1.94305582273933e-69	-1.73343	0.011	0.086	4.57511924022202e-65	M1	LCOR
2.31986211543991e-69	-3.77367	0.002	0.066	5.46234733701482e-65	M1	TSPAN32
2.3758560215916e-69	-2.0747	0.009	0.083	5.59419058843957e-65	M1	TFCP2
2.44962738818968e-69	-1.26497	0.016	0.096	5.76789264823142e-65	M1	AGPAT2
2.47229806976331e-69	-1.12216	0.021	0.106	5.8212730350647e-65	M1	UPF3A
2.50923392273201e-69	-2.0156	0.008	0.081	5.9082421944648e-65	M1	TTC19
2.58267352276488e-69	-0.679176	0.037	0.135	6.08116307670219e-65	M1	ARL8B
2.78312395698938e-69	-2.08363	0.007	0.078	6.55314366912719e-65	M1	MAP4K5
2.90935602782802e-69	-1.9659	0.009	0.082	6.85036970312385e-65	M1	NEU1
3.2252639162035e-69	-0.202076	0.197	0.389	7.59420641709276e-65	M1	SERBP1
3.32461547931148e-69	-1.362	0.016	0.095	7.82813960758682e-65	M1	HDAC8
3.38269060989121e-69	-0.29232	0.106	0.249	7.96488331004985e-65	M1	ILF2
3.46224942854122e-69	-1.10207	0.024	0.112	8.15221250444315e-65	M1	TOP2B
3.65960529626392e-69	-1.78927	0.01	0.084	8.61690663058302e-65	M1	IWS1
3.66638304497734e-69	-0.241161	0.106	0.249	8.63286551770364e-65	M1	ZNF385A
3.82945010059e-69	-1.35776	0.012	0.088	9.01682320684923e-65	M1	SLC15A3
3.83766922845905e-69	-1.06126	0.02	0.103	9.03617596532968e-65	M1	VASH1
3.86154154248316e-69	-3.48956	0.002	0.068	9.09238571593084e-65	M1	GADD45B
3.89902559576909e-69	-1.48253	0.015	0.093	9.1806456677979e-65	M1	RNF111
4.02358943454975e-69	-0.990845	0.029	0.12	9.47394368259085e-65	M1	RAB3GAP1
4.04762827825722e-69	-2.65564	0.005	0.073	9.53054554398444e-65	M1	ARMH3
4.05037702727139e-69	-2.6548	0.005	0.073	9.5370177484132e-65	M1	PIKFYVE
4.15206716553565e-69	-2.41164	0.006	0.076	9.77645734797023e-65	M1	NECTIN2
4.39229401161502e-69	-0.7455	0.037	0.134	1.03420954797487e-64	M1	RAP2B
5.0155122074156e-69	-1.2054	0.02	0.104	1.18095250435808e-64	M1	ZNF652
5.47884590223881e-69	-0.19708	0.095	0.231	1.29004905614115e-64	M1	ZC3H15
6.01637179776753e-69	-0.168757	0.167	0.343	1.41661490350234e-64	M1	XRCC6
[truncated: 77,957 more rows]

## Sheet: csf.b.lymphoidL2.markers
p_val	avg_log2FC	pct.1	pct.2	p_val_adj	cluster	gene
4.48480518497856e-86	-2.70025	0.133	0.8	1.05599222885505e-81	b2	MS4A1
1.00786085554182e-78	-2.93828	0.084	0.731	2.37310917045876e-74	b2	BANK1
1.54700021324693e-74	-2.72807	0.065	0.699	3.64256670211122e-70	b2	RALGPS2
2.19614308207902e-68	-1.68434	0.368	0.853	5.17103850106325e-64	b2	CD37
1.04565462408622e-61	-2.04258	0.078	0.662	2.46209837787342e-57	b2	CD79B
1.59875486824823e-59	-2.64625	0.042	0.578	3.76442821277728e-55	b2	BLK
7.10894667825159e-58	-3.56365	0.021	0.518	1.67387258486112e-53	b2	LINC00926
4.64223612745719e-57	-0.994643	0.937	0.982	1.09306091857107e-52	b2	CD74
8.37588277058937e-56	-2.7064	0.042	0.547	1.97218535716297e-51	b2	AFF3
1.32743729893764e-54	-2.3753	0.039	0.541	3.12558386407856e-50	b2	GNG7
3.69785214041577e-54	3.92429	0.329	0.021	8.70696264982297e-50	b2	IGKV1D-8
2.88140524147433e-53	-1.92755	0.167	0.707	6.78455678157546e-49	b2	CXCR4
9.64239563415009e-53	-2.62945	0.034	0.519	2.27039847601698e-48	b2	CD19
1.05229138705186e-52	-1.86637	0.055	0.564	2.47772529995231e-48	b2	SWAP70
1.70874298837812e-52	-1.72891	0.07	0.588	4.02340624043511e-48	b2	SNX2
2.45166525353543e-52	4.32522	0.35	0.037	5.77269100597453e-48	b2	CD3E
1.25812639902961e-51	-2.06865	0.05	0.546	2.96238441915512e-47	b2	SPIB
9.1749854452348e-51	-1.25991	0.585	0.897	2.16034207293498e-46	b2	HLA-DRA
2.75731702903568e-50	-1.16708	0.133	0.699	6.49237867656742e-46	b2	SYNGR2
1.49158122980359e-49	-1.95454	0.052	0.537	3.51207716369553e-45	b2	POU2F2
1.82333017859798e-49	-1.27312	0.133	0.692	4.2932132385268e-45	b2	NCF1
2.15543928886965e-48	-3.03608	0.021	0.461	5.07519734957247e-44	b2	TNFRSF13B
4.52971905164632e-48	3.64049	0.358	0.05	1.06656764790064e-43	b2	IL7R
1.60665043880693e-46	-2.50484	0.047	0.5	3.78301912321479e-42	b2	CD24
3.08735810623734e-46	-2.69114	0.029	0.461	7.26949339694644e-42	b2	SMIM14
4.83837318918023e-46	-1.87379	0.07	0.547	1.13924335112438e-41	b2	ARHGAP24
5.22380819300134e-46	-1.005	0.107	0.63	1.2299978771241e-41	b2	KMT2E
5.47797094631572e-46	-2.86211	0.034	0.469	1.2898430390195e-41	b2	OSBPL10
4.33046745179371e-45	-1.16172	0.141	0.668	1.01965186619935e-40	b2	HLA-DMA
4.14768673069516e-44	-1.72257	0.05	0.492	9.76614317609482e-40	b2	CAPG
4.65848907493573e-44	-1.76753	0.05	0.493	1.09688783758437e-39	b2	MARCH1
6.737314389718e-44	-1.06263	0.159	0.711	1.586368046203e-39	b2	MEF2C
9.77745000028224e-44	-2.51759	0.034	0.453	2.30219837706646e-39	b2	FCRLA
1.22279316739092e-43	-1.45328	0.081	0.555	2.87918879193866e-39	b2	CD82
1.9688060560034e-43	-1.19078	0.131	0.652	4.6357507394656e-39	b2	ZFAS1
3.50545712543546e-43	-1.21019	0.115	0.623	8.25394934755033e-39	b2	POLD4
4.9311313779945e-43	2.63667	0.386	0.083	1.16108419426258e-38	b2	IGHV4-59
7.26102146046183e-43	-4.71514	0.008	0.393	1.70968011308034e-38	b2	EBF1
1.31577524029994e-42	-1.8223	0.047	0.477	3.09812438081023e-38	b2	PDLIM1
2.15922069208303e-42	-1.20389	0.063	0.509	5.08410104157871e-38	b2	PLCG2
4.63658895751116e-42	-2.32529	0.034	0.445	1.09173123593558e-37	b2	TNFRSF13C
6.2204385747896e-42	-1.3485	0.081	0.545	1.46466446681996e-37	b2	SP140
1.71064167236423e-41	-1.49575	0.057	0.492	4.02787688174882e-37	b2	TCF4
2.6134761826376e-41	-1.19169	0.089	0.556	6.1536910196385e-37	b2	LYN
2.98453885731846e-41	-1.59285	0.034	0.441	7.02739519344205e-37	b2	LY86
1.53493886847843e-40	-1.28171	0.065	0.504	3.61416705971931e-36	b2	SYPL1
2.23128095318243e-40	-1.10106	0.104	0.578	5.25377413236334e-36	b2	SYK
4.37818568638121e-40	-0.741149	0.141	0.654	1.03088760171532e-35	b2	CIRBP
3.15816577538403e-39	-2.0724	0.052	0.46	7.43621713471923e-35	b2	ID3
3.77042987334737e-39	-0.877051	0.141	0.649	8.87785417978372e-35	b2	SRSF5
4.60146716531193e-39	-1.58769	0.065	0.489	1.08346145874435e-34	b2	TPD52
5.25502372289643e-39	-1.36223	0.052	0.464	1.23734788579319e-34	b2	HLA-DMB
1.46241618513653e-38	0.295445	0.407	0.103	3.44340514952248e-34	b2	IGHV4-39
1.79653946786657e-38	-1.56288	0.06	0.472	4.23013183103863e-34	b2	RASGRP2
1.83754963407141e-38	-1.37123	0.037	0.428	4.32669436838455e-34	b2	LAT2
1.83900232866052e-38	3.13344	0.386	0.097	4.33011488306407e-34	b2	IL32
2.59119027917047e-38	-2.15584	0.039	0.428	6.1012166313348e-34	b2	LINC02397
2.61938379413804e-38	-1.53119	0.091	0.53	6.16760108167742e-34	b2	IGHA1
2.68664797430223e-38	-0.750408	0.123	0.607	6.32598132029203e-34	b2	LSM7
3.10450025422817e-38	-1.07898	0.073	0.504	7.30985629860564e-34	b2	SMARCB1
3.34341153155171e-38	-0.714707	0.154	0.669	7.87239679219167e-34	b2	SNX3
3.99996090299325e-38	-1.9244	0.042	0.432	9.41830794218792e-34	b2	HVCN1
4.75981607845163e-38	-1.70311	0.034	0.417	1.12074629383222e-33	b2	NCF4
5.2055396397717e-38	-1.7727	0.044	0.438	1.22569636358064e-33	b2	ADAM28
5.5589807171375e-38	-1.0541	0.117	0.59	1.3089175996572e-33	b2	PTPRCAP
7.70789605071328e-38	-2.48537	0.026	0.398	1.81490120410095e-33	b2	ACP5
1.6103228270207e-37	-1.19076	0.07	0.491	3.79166612850293e-33	b2	UVRAG
1.73590970276691e-37	-2.36175	0.023	0.389	4.08737298613496e-33	b2	AIM2
1.17262838096624e-36	-4.63964	0.023	0.378	2.76107078582311e-32	b2	IGHG2
1.43426483506978e-36	-0.819463	0.167	0.656	3.3771199806553e-32	b2	IFI30
1.9384458839626e-36	-2.82891	0.026	0.385	4.56426467837833e-32	b2	NIBAN3
2.61131050987007e-36	-0.751328	0.222	0.764	6.14859172654008e-32	b2	LIMD2
3.79195764969885e-36	-1.24256	0.055	0.449	8.92854348198091e-32	b2	LMBRD1
4.04711064051374e-36	-0.619245	0.094	0.532	9.52932671415366e-32	b2	SNU13
8.34652087118066e-36	1.75141	0.415	0.124	1.9652718043282e-31	b2	IGKV3-15
2.12395551134763e-35	-0.868975	0.217	0.749	5.00106564701912e-31	b2	EZR
2.25609689223237e-35	-0.651426	0.138	0.611	5.31220574245033e-31	b2	CHCHD10
2.6309910746937e-35	-1.45325	0.052	0.434	6.19493158447379e-31	b2	CXXC5
3.25539142842477e-35	3.91796	0.345	0.083	7.66514465736897e-31	b2	CST3
5.21342463418555e-35	-0.78681	0.178	0.684	1.22755296436533e-30	b2	BTG2
6.18372110269533e-35	-0.937335	0.107	0.547	1.45601897084064e-30	b2	SP110
7.07975568371363e-35	-0.821698	0.185	0.684	1.66699927328721e-30	b2	RCSD1
8.56782079587836e-35	-0.806884	0.102	0.533	2.01737908459752e-30	b2	CTSH
9.68582963666379e-35	-3.25751	0.018	0.355	2.28062544624886e-30	b2	VPREB3
1.16057809599323e-34	-1.31614	0.078	0.482	2.73269718482565e-30	b2	PDE4B
1.39743106937064e-34	-1.1561	0.044	0.416	3.29039119594011e-30	b2	ORAI2
1.48694184617282e-34	-0.767286	0.089	0.508	3.50115327099852e-30	b2	POU2AF1
1.54902749178981e-34	-1.00985	0.084	0.496	3.64734013216828e-30	b2	TMEM154
1.7662643378713e-34	-0.911608	0.115	0.553	4.15884600995176e-30	b2	CIB1
2.97434989094664e-34	-0.647357	0.117	0.564	7.00340425322296e-30	b2	SELENOH
5.51214678479295e-34	-0.477645	0.159	0.647	1.29789008194735e-29	b2	ATP6V1G1
5.70345302060171e-34	-0.745155	0.225	0.761	1.34293504823088e-29	b2	NOP53
1.11877474533422e-33	-0.875299	0.076	0.473	2.63426701536395e-29	b2	ELOVL5
1.30167212967394e-33	-0.559896	0.131	0.586	3.06491719653026e-29	b2	ANXA6
2.20158500221834e-33	-2.35454	0.023	0.358	5.1838520462233e-29	b2	CD40
2.27221319896289e-33	3.75239	0.274	0.044	5.35015319827803e-29	b2	FYB1
6.60454956868209e-33	-2.71302	0.016	0.338	1.55510724144189e-28	b2	BCAS4
1.27851930617605e-32	-0.886084	0.073	0.46	3.01040155832214e-28	b2	BLNK
1.97544621081986e-32	-0.438858	0.178	0.672	4.65138564799645e-28	b2	ERP29
2.01471219588427e-32	-0.453077	0.138	0.594	4.7438413364291e-28	b2	ISCU
2.0610024269802e-32	-1.01759	0.06	0.43	4.85283631456757e-28	b2	TMEM243
2.5298810987485e-32	-0.553972	0.18	0.677	5.95685803511321e-28	b2	UQCRH
5.00187622250845e-32	-0.587732	0.154	0.618	1.17774177535184e-27	b2	PRR13
5.35611469148316e-32	-2.37907	0.029	0.355	1.26115076525663e-27	b2	CDK14
5.87114523869904e-32	-0.653821	0.104	0.52	1.38241985790408e-27	b2	CNPY3
6.96658584078111e-32	-0.890938	0.076	0.46	1.64035230207032e-27	b2	RGS19
7.18379501005323e-32	-0.389805	0.162	0.642	1.69149637306713e-27	b2	ANAPC16
1.09199185162246e-31	-1.06203	0.063	0.43	2.57120401383025e-27	b2	IFNGR2
1.16172060783406e-31	-0.798739	0.128	0.56	2.73538734320607e-27	b2	STK17A
1.43337960042739e-31	-1.23283	0.052	0.405	3.37503560716633e-27	b2	UBE2N
1.57134356606716e-31	-1.47845	0.031	0.363	3.69988556066173e-27	b2	TSPAN3
1.77040973907956e-31	-1.56925	0.031	0.361	4.16860677163674e-27	b2	COBLL1
1.80007109190255e-31	-1.33884	0.05	0.398	4.23844739299374e-27	b2	NT5C
2.6593673108766e-31	-0.499637	0.136	0.578	6.26174627019004e-27	b2	SH3BGRL
2.7596655021553e-31	-0.800861	0.07	0.444	6.49790839137486e-27	b2	HSPE1
2.89385071646821e-31	-0.757386	0.091	0.486	6.81386089699604e-27	b2	MTPN
2.95970073336564e-31	-0.413626	0.183	0.673	6.96891134678274e-27	b2	PSMB9
5.12937212079176e-31	-0.511962	0.123	0.546	1.20776195956163e-26	b2	NSA2
5.22877111039014e-31	-0.491848	0.125	0.555	1.23116644565246e-26	b2	FUS
6.34356786275951e-31	-0.886742	0.081	0.46	1.49365648896535e-26	b2	REL
7.38529778103331e-31	-0.680787	0.076	0.449	1.7389422155221e-26	b2	PSMB10
7.96901065830906e-31	-2.20217	0.031	0.354	1.87638324960545e-26	b2	CHPT1
1.24577992939907e-30	-0.61383	0.065	0.427	2.93331342176306e-26	b2	SPI1
1.25793940434582e-30	-0.777111	0.295	0.81	2.96194412147267e-26	b2	HLA-DQA1
1.46379838683875e-30	-0.445413	0.198	0.701	3.44665968165053e-26	b2	TRIR
1.52549733327546e-30	-0.824023	0.131	0.553	3.5919360209304e-26	b2	VOPP1
1.57553323250167e-30	-0.73553	0.167	0.622	3.70975054924844e-26	b2	FCMR
2.00277230155074e-30	-0.562934	0.11	0.518	4.71572766123137e-26	b2	HLA-F
2.02823286698304e-30	-1.61911	0.042	0.373	4.77567710859827e-26	b2	GGA2
2.08288046952953e-30	-2.1621	0.021	0.328	4.90435035355423e-26	b2	BCL11A
2.22117669457137e-30	-0.487879	0.162	0.623	5.22998264503775e-26	b2	SEC62
2.46793799382215e-30	-0.961022	0.07	0.436	5.81100680025364e-26	b2	ODC1
3.62870749859345e-30	-0.444073	0.138	0.577	8.54415467618813e-26	b2	SRSF7
4.78882709612565e-30	-0.828161	0.089	0.469	1.12757722805375e-25	b2	FAM49B
4.91463095927594e-30	-0.954521	0.07	0.432	1.15719900567111e-25	b2	STX7
5.08354944458174e-30	-0.865642	0.091	0.47	1.19697255222122e-25	b2	TNRC6B
5.4287029118982e-30	-0.626956	0.086	0.467	1.27824238763555e-25	b2	SNHG7
5.52392171751068e-30	-0.869714	0.057	0.408	1.30066260760507e-25	b2	DBNL
5.67075707882304e-30	-3.20914	0.008	0.296	1.33523646177967e-25	b2	CLECL1
7.21732205232017e-30	-4.02401	0.005	0.289	1.69939065043931e-25	b2	PLEKHG1
8.73188562614173e-30	-0.53432	0.091	0.479	2.05600978953133e-25	b2	INPP5D
8.73866949032293e-30	-0.749976	0.107	0.501	2.05760711819144e-25	b2	PRKCB
9.10289858877893e-30	-0.255014	0.133	0.563	2.14336850171389e-25	b2	GRB2
1.05983159760969e-29	-0.962507	0.055	0.397	2.49547947973178e-25	b2	NAPSA
1.10292080245136e-29	-2.3763	0.018	0.318	2.59693732145198e-25	b2	PAX5
1.20817543143621e-29	-1.64248	0.023	0.329	2.84476987085969e-25	b2	WDFY4
1.26659463513706e-29	-1.50368	0.026	0.334	2.98232372789372e-25	b2	TRIM38
1.33018130812425e-29	-0.426368	0.154	0.6	3.13204490810936e-25	b2	ATP6V0E1
1.37789587035106e-29	-0.437418	0.104	0.504	3.24439361632861e-25	b2	TBC1D10C
1.39940063131178e-29	-1.12593	0.068	0.422	3.29502872648672e-25	b2	ARID5B
1.73804242551523e-29	-0.62911	0.091	0.472	4.09239469511817e-25	b2	SMAP2
1.78011966867823e-29	-1.97006	0.034	0.348	4.19146977186977e-25	b2	BIRC3
1.82546387948777e-29	-0.397283	0.133	0.56	4.2982372506419e-25	b2	SF3B2
1.92829534778094e-29	-0.429734	0.149	0.589	4.540364225885e-25	b2	UXT
2.08398479466792e-29	-0.767449	0.086	0.457	4.90695059752508e-25	b2	CD47
2.77348153740736e-29	-0.549512	0.157	0.602	6.53043962797936e-25	b2	PTPN6
3.4823267262455e-29	-0.544142	0.081	0.448	8.19948650961765e-25	b2	JMJD1C
4.1237458896685e-29	-0.40585	0.133	0.56	9.70977207181346e-25	b2	HIGD2A
4.5691497248991e-29	-1.85062	0.034	0.346	1.07585199422474e-24	b2	LYL1
7.4189336683206e-29	-0.408344	0.12	0.527	1.74686212154277e-24	b2	RBM3
7.55872657629623e-29	-0.530764	0.097	0.48	1.77977775965471e-24	b2	RPL22L1
8.04063730145173e-29	-2.29921	0.023	0.321	1.89324845899983e-24	b2	SKIL
1.18738424653005e-28	-2.04729	0.029	0.331	2.79581494687966e-24	b2	P2RX5
1.19752126539242e-28	-0.779917	0.078	0.436	2.81968357149298e-24	b2	CCDC50
1.30055193235291e-28	-0.412238	0.151	0.589	3.06227957991816e-24	b2	SNHG6
1.40654780787575e-28	-2.69195	0.016	0.301	3.31185746842424e-24	b2	FCRL1
1.57398099265152e-28	0.601011	0.982	0.961	3.70609564529728e-24	b2	TPT1
1.74271936030381e-28	-0.474751	0.154	0.591	4.10340700577136e-24	b2	PNISR
2.10859492660234e-28	-0.214201	0.125	0.53	4.96489761417788e-24	b2	VAMP2
2.12772985978887e-28	-0.374456	0.997	0.975	5.00995272785888e-24	b2	RPL41
2.2053474401808e-28	-0.839708	0.078	0.437	5.1927110826497e-24	b2	AC004687.1
2.39813384296612e-28	-0.354798	0.193	0.666	5.64664594664803e-24	b2	SP100
3.06574730654798e-28	-0.101523	0.112	0.509	7.21860860799788e-24	b2	DAD1
3.47960441365408e-28	-0.766768	0.504	0.895	8.1930765523899e-24	b2	HLA-DPA1
3.63909488941127e-28	-0.384514	0.164	0.613	8.56861282660777e-24	b2	TRMT112
3.8092729997346e-28	-0.426681	0.131	0.54	8.96931420517508e-24	b2	PARP1
4.10704038089315e-28	-2.12014	0.029	0.326	9.67043728085101e-24	b2	PKIG
4.14232819170909e-28	-1.19087	0.037	0.345	9.75352596019821e-24	b2	DRAM2
4.40799673475629e-28	-0.731984	0.078	0.431	1.03790691116572e-23	b2	SNHG8
4.47830083725672e-28	-0.268601	0.133	0.546	1.05446071514047e-23	b2	ICAM3
5.52529854050293e-28	-0.290766	0.198	0.675	1.30098679434682e-23	b2	EIF3L
5.60821443967174e-28	-0.621568	0.086	0.445	1.32051017196511e-23	b2	ATP2B1
6.82629317410434e-28	-0.873193	0.042	0.355	1.60731899077461e-23	b2	SKAP2
7.75776138180518e-28	3.68978	0.222	0.032	1.82664249495985e-23	b2	GIMAP7
9.37228322552133e-28	-0.274673	0.125	0.53	2.20679780828125e-23	b2	CTSS
9.7413080151342e-28	-0.729272	0.266	0.748	2.2936883852435e-23	b2	RPS20
1.12817786588157e-27	-0.426021	0.073	0.419	2.65640760300474e-23	b2	CIAO2A
1.50639688998042e-27	-0.217282	0.164	0.608	3.5469621171479e-23	b2	ATP5F1D
1.77443485486222e-27	-0.248479	0.131	0.539	4.17808430925857e-23	b2	IL16
1.85929239508208e-27	-0.30377	0.128	0.531	4.37788987346027e-23	b2	FNBP1
2.12078384494446e-27	-1.01648	0.06	0.386	4.99359764130622e-23	b2	ZCCHC7
2.19278743784466e-27	-0.349106	0.125	0.53	5.16313730114903e-23	b2	NDUFA11
2.21882170912722e-27	-0.4681	0.084	0.438	5.22443759631096e-23	b2	LAMTOR5
2.28718161847441e-27	-1.42038	0.047	0.36	5.38539783885983e-23	b2	ADK
2.47567610435189e-27	-1.95565	0.026	0.314	5.82922695530696e-23	b2	RUBCNL
2.68528936391873e-27	-0.940917	0.055	0.377	6.32278233628304e-23	b2	PALM2-AKAP2
2.90072133395102e-27	-0.740323	0.081	0.431	6.83003845292108e-23	b2	RPS10
3.05094983774086e-27	-0.340575	0.117	0.511	7.18376648794462e-23	b2	ZNF706
3.38506863249828e-27	-0.877714	0.068	0.402	7.97048260208045e-23	b2	PPM1K
3.43485874967847e-27	-2.70295	0.018	0.294	8.08771841199291e-23	b2	FAM30A
3.63800228161169e-27	-0.622382	0.089	0.442	8.56604017228289e-23	b2	CAMK1D
4.68162730759917e-27	-0.504058	0.901	0.964	1.1023359658473e-22	b2	RPL11
4.8903539769331e-27	-1.07581	0.044	0.352	1.15148274740867e-22	b2	FCGR2B
5.01548591824804e-27	-0.354624	0.18	0.624	1.18094631431068e-22	b2	SEPTIN6
5.62003837955454e-27	-0.246712	0.154	0.583	1.32329423684991e-22	b2	SMDT1
6.22903896504972e-27	-3.19165	0.01	0.276	1.46668951471061e-22	b2	HLA-DOB
7.14571031197125e-27	-0.410924	0.112	0.489	1.68252895005675e-22	b2	LAMTOR4
7.24951386734626e-27	-0.935212	0.07	0.404	1.70697053520535e-22	b2	MEF2A
7.41659034828933e-27	-1.09326	0.044	0.351	1.7463103634082e-22	b2	TMEM156
7.96615039582099e-27	-0.859676	0.057	0.38	1.87570977220001e-22	b2	C9orf16
1.01001908404153e-26	-3.55316	0.005	0.263	2.37819093528419e-22	b2	KYNU
1.03155470995464e-26	5.31833	0.164	0.011	2.42889872005918e-22	b2	CD3G
1.08821342284525e-26	-0.224018	0.123	0.514	2.56230732543142e-22	b2	CSNK2B
1.10354634755623e-26	-2.33964	0.021	0.297	2.5984102299559e-22	b2	TLR10
1.22392444949951e-26	-0.489104	0.107	0.477	2.88185250879154e-22	b2	ITSN2
1.26678551133162e-26	-1.72708	0.018	0.293	2.98277316498144e-22	b2	GAPT
1.2986333266547e-26	-1.38792	0.034	0.325	3.05776203094116e-22	b2	SHMT2
1.51165816442512e-26	-1.05477	0.047	0.352	3.5593503139554e-22	b2	ADRM1
1.53897389509114e-26	3.60996	0.209	0.028	3.62366793338161e-22	b2	INPP4B
1.56520953039229e-26	-1.48598	0.023	0.303	3.68544236026168e-22	b2	FGD2
1.58812682878643e-26	-0.504755	0.922	0.95	3.73940343106054e-22	b2	RPS23
1.81208574217897e-26	-1.45962	0.039	0.334	4.26673708853461e-22	b2	SCIMP
2.14377419447659e-26	-0.80898	0.063	0.385	5.04773071831458e-22	b2	BBX
2.20812225662716e-26	-1.7414	0.021	0.296	5.19924466545432e-22	b2	TFEB
2.85610606256081e-26	-0.178683	0.18	0.632	6.72498733490569e-22	b2	SKP1
2.9539379499965e-26	-0.45095	0.097	0.454	6.95534229706177e-22	b2	NDUFB4
3.21215741517408e-26	-0.278193	0.198	0.662	7.56334584976889e-22	b2	HNRNPDL
3.60382113662706e-26	-0.703935	0.047	0.352	8.48555724830207e-22	b2	BTK
3.6850577588905e-26	-0.781703	0.065	0.39	8.67683699908357e-22	b2	SH3BP5
3.7901530042407e-26	-0.534787	0.133	0.519	8.92429426378515e-22	b2	LBH
4.13033796756884e-26	-0.531358	0.07	0.4	9.72529377843759e-22	b2	DDX18
4.78637512105674e-26	-0.32932	0.175	0.615	1.12699988600402e-21	b2	TCEA1
4.80788787889094e-26	-0.977111	0.06	0.377	1.13206527996366e-21	b2	MTSS1
4.86674674562758e-26	-0.797967	0.073	0.404	1.14592418872547e-21	b2	PTPN1
5.51339951909069e-26	-0.357856	0.102	0.464	1.29818505076509e-21	b2	VPS28
5.54538889691445e-26	1.6314	0.235	0.041	1.30571726966748e-21	b2	IGHV4-61
5.91026257299983e-26	-0.102396	0.136	0.537	1.39163042543854e-21	b2	ATP6V0C
6.78524340293217e-26	-0.76123	0.065	0.386	1.59765341165441e-21	b2	TERF2IP
7.19173220922468e-26	-0.706655	0.07	0.397	1.69336526598404e-21	b2	HSH2D
7.88028552452514e-26	-0.27515	0.104	0.468	1.85549202960469e-21	b2	MPHOSPH8
8.75902390724988e-26	-1.14343	0.055	0.361	2.06239976920106e-21	b2	CMTM7
9.12517743559922e-26	-0.588311	0.081	0.416	2.14861427898619e-21	b2	CMTM6
9.71353365266447e-26	-0.447413	0.162	0.581	2.28714863385638e-21	b2	ANKRD44
1.01538330073437e-25	-0.680411	0.209	0.652	2.39082151990914e-21	b2	RIPOR2
1.13972964308683e-25	-0.171505	0.138	0.536	2.68360741761224e-21	b2	PRRC2C
1.22910006794256e-25	-0.248713	0.104	0.467	2.89403901997755e-21	b2	TBC1D5
1.26098602583571e-25	-1.13397	0.039	0.328	2.96911769643277e-21	b2	CIITA
1.51016854613707e-25	-1.46192	0.023	0.295	3.55584285873435e-21	b2	PLEKHF2
1.58186406275107e-25	-0.821115	0.057	0.366	3.72465712215366e-21	b2	WASHC4
1.72870921635814e-25	-1.04628	0.039	0.328	4.07041872083689e-21	b2	PSMD4
1.80963604872956e-25	-0.658455	0.065	0.383	4.26096904033861e-21	b2	TRABD
1.85008455533473e-25	-1.17952	0.042	0.333	4.35620909399117e-21	b2	RSBN1L
1.97676043724289e-25	-0.166081	0.154	0.563	4.6544801255321e-21	b2	NDUFB11
2.31744832524093e-25	-0.290861	0.264	0.781	5.4566638266123e-21	b2	GABARAP
2.33690278257281e-25	-0.37944	0.125	0.501	5.50247129184593e-21	b2	EIF2S3
3.13531324077462e-25	-1.13712	0.037	0.321	7.38240855672792e-21	b2	PXK
3.37009606258496e-25	-0.520373	0.107	0.461	7.93522818896256e-21	b2	RPS27L
3.56859248682355e-25	-0.636098	0.496	0.918	8.40260786947474e-21	b2	CD79A
4.19583602617598e-25	-0.401843	0.107	0.466	9.87951550723397e-21	b2	TAPBP
4.57766003337969e-25	-0.243707	0.133	0.519	1.07785583145958e-20	b2	C19orf53
4.67775396457072e-25	-2.5365	0.016	0.273	1.10142394849782e-20	b2	CD70
4.69998135715011e-25	-3.23335	0.008	0.255	1.10665761035456e-20	b2	IGHV5-78
4.81180814981651e-25	-0.707114	0.418	0.877	1.1329883469558e-20	b2	OAZ1
5.18296634548246e-25	-1.10944	0.042	0.331	1.2203812557073e-20	b2	STRBP
5.51259234613483e-25	-0.769995	0.055	0.357	1.29799499382091e-20	b2	PRMT1
5.98219703391832e-25	-0.240098	0.104	0.457	1.40856811360641e-20	b2	THRAP3
6.745257290864e-25	-0.982432	0.05	0.344	1.58823828170684e-20	b2	CDC40
6.76204846988156e-25	-2.06085	0.11	0.44	1.59219193271831e-20	b2	IGHM
7.15282434533006e-25	-0.772391	0.068	0.382	1.68420402035142e-20	b2	SYF2
7.22678700250835e-25	-0.849653	0.042	0.329	1.70161926761061e-20	b2	DAPP1
7.92115168947984e-25	-1.59585	0.026	0.294	1.86511437680492e-20	b2	IFT57
8.29158891536791e-25	-0.461337	0.95	0.968	1.95233752601253e-20	b2	RPS8
9.10771024423887e-25	-0.110418	0.133	0.521	2.14450145410849e-20	b2	TOMM6
9.23311351810818e-25	-1.05303	0.042	0.328	2.17402890897375e-20	b2	IRF8
9.633022341163e-25	-0.415939	0.097	0.441	2.26819144045024e-20	b2	SELENOF
1.06597085225711e-24	-0.128065	0.164	0.584	2.50993496872459e-20	b2	PPP1CA
1.09779050776331e-24	-0.377843	0.144	0.531	2.58485752957948e-20	b2	NCOA3
1.14320359784068e-24	-0.193428	0.136	0.521	2.69178719147568e-20	b2	PRDX1
1.15936976610471e-24	-0.695407	0.065	0.377	2.72985205127015e-20	b2	PRDM2
1.17900993453796e-24	-0.361054	0.107	0.46	2.77609679186308e-20	b2	TOMM20
1.18678654987557e-24	-0.167962	0.115	0.477	2.79440761033701e-20	b2	TMBIM4
1.32800996760837e-24	-0.254399	0.167	0.581	3.12693226973067e-20	b2	EIF4A2
1.3581809779577e-24	-0.316999	0.154	0.556	3.19797293069921e-20	b2	EVI2B
1.38611600200448e-24	-0.841059	0.05	0.34	3.26374873831974e-20	b2	APH1A
1.55462932501888e-24	-0.177033	0.128	0.505	3.66053020868945e-20	b2	CDC37
1.73559655274743e-24	-0.364731	0.206	0.653	4.08663564309911e-20	b2	GAS5
1.85305527659774e-24	-0.504008	0.102	0.445	4.36320395427704e-20	b2	SRPK2
1.91971140950584e-24	-1.15817	0.039	0.32	4.52015248482246e-20	b2	ALOX5
1.94522177355215e-24	-0.341622	0.104	0.456	4.5802191880059e-20	b2	SCAF11
2.05525837831671e-24	-0.41804	0.214	0.664	4.83931137758453e-20	b2	CD53
2.06679511146579e-24	-1.7579	0.029	0.295	4.86647576945734e-20	b2	PARP15
2.08205703923642e-24	-0.81271	0.047	0.336	4.90241150458608e-20	b2	WSB1
2.2214714664107e-24	-0.76908	0.449	0.866	5.23067671481063e-20	b2	BTG1
2.55535894958124e-24	-1.01466	0.047	0.335	6.01684818268398e-20	b2	SMC6
2.6925132524996e-24	-0.533	0.065	0.371	6.33979170433557e-20	b2	LAMTOR1
2.73710126012484e-24	-0.206666	0.133	0.511	6.44477862708994e-20	b2	SRRM1
2.88596508514741e-24	-0.492761	0.178	0.591	6.79529338948809e-20	b2	ISG20
2.96817682076212e-24	-0.964757	0.047	0.333	6.98886914216649e-20	b2	RB1
3.10688120301909e-24	-0.310592	0.112	0.467	7.31546248062875e-20	b2	EML4
3.34390943375924e-24	-0.105065	0.107	0.454	7.87356915272951e-20	b2	POLR2L
3.52018236163323e-24	-0.204085	0.151	0.546	8.2886213887016e-20	b2	ATP5PO
3.52940696862728e-24	-0.656377	0.068	0.374	8.3103416483298e-20	b2	R3HDM4
3.5318221675255e-24	-0.264039	0.089	0.421	8.31602847565554e-20	b2	MRPS21
3.61573636726763e-24	-0.481948	0.073	0.389	8.51361285036837e-20	b2	SASH3
3.62990861785535e-24	-1.60615	0.021	0.277	8.54698283160222e-20	b2	CYSLTR1
4.00336026819712e-24	-0.410437	0.086	0.415	9.42631208749694e-20	b2	RNPS1
4.09311674318249e-24	-0.545704	0.063	0.366	9.6376526834975e-20	b2	ARPC5L
4.1808080588801e-24	-0.153158	0.117	0.479	9.84413065543908e-20	b2	IKZF3
4.1928754562119e-24	-0.779855	0.057	0.354	9.87254454919654e-20	b2	PYCARD
4.34387542200233e-24	-0.270767	0.123	0.487	1.02280890686467e-19	b2	NDUFA3
4.3700288545238e-24	-3.54063	0.008	0.246	1.02896699408617e-19	b2	SSPN
4.43647222038646e-24	-0.764237	0.052	0.344	1.0446117490122e-19	b2	LSM10
4.62488856991691e-24	-0.765008	0.467	0.847	1.08897626267264e-19	b2	CD52
5.12231618222717e-24	-0.452813	0.084	0.409	1.20610056826721e-19	b2	PPP3CC
5.29274595136631e-24	-0.114757	0.183	0.609	1.24622996170871e-19	b2	RAN
5.5048944330365e-24	-0.681887	0.081	0.402	1.29618244320277e-19	b2	GPR183
5.8654620631945e-24	-0.27646	0.128	0.496	1.38108169739978e-19	b2	ATP5MD
6.15399866881533e-24	-0.430612	0.073	0.385	1.44902052655926e-19	b2	ROCK1
6.38642378425728e-24	-1.41706	0.031	0.296	1.50374734424122e-19	b2	SYVN1
6.56622891891089e-24	-1.61937	0.021	0.275	1.54608426124676e-19	b2	LRMP
7.65747912045048e-24	-0.525452	0.086	0.409	1.80303003370127e-19	b2	UBE2B
8.76392397044e-24	-0.771061	0.055	0.346	2.0635535380798e-19	b2	ATP5MC1
1.05736443836973e-23	-0.659038	0.063	0.361	2.48967030658537e-19	b2	ZFAND6
1.12899233083854e-23	-0.886746	0.037	0.307	2.65832534219242e-19	b2	CTSZ
1.14731808347383e-23	-0.321327	0.107	0.451	2.70147515934748e-19	b2	HNRNPA0
1.17380631328797e-23	-0.102354	0.146	0.538	2.76384434526786e-19	b2	UBE2I
1.18754556999888e-23	-1.03914	0.055	0.344	2.79619479911935e-19	b2	SESN3
1.19462726011834e-23	-0.137759	0.115	0.468	2.81286934667465e-19	b2	UBXN4
1.23751116534229e-23	-2.63175	0.016	0.258	2.91384378991496e-19	b2	QRSL1
1.24565073676934e-23	-0.157369	0.198	0.642	2.93300922479709e-19	b2	HMGN1
1.27594017123498e-23	-0.131309	0.146	0.527	3.00432872718989e-19	b2	SAT1
1.35985509964254e-23	-0.503355	0.076	0.386	3.20191481761831e-19	b2	ECH1
1.84317272035224e-23	-0.512934	0.086	0.405	4.33993448734137e-19	b2	RBM8A
1.91924123774391e-23	-0.69017	0.057	0.35	4.51904541839182e-19	b2	BPTF
1.9244658069221e-23	-0.271526	0.12	0.476	4.53134718897878e-19	b2	N4BP2L2
2.13219278858853e-23	-0.516539	0.154	0.539	5.02046114001056e-19	b2	ZBTB20
2.29639736275463e-23	-0.241115	0.193	0.626	5.40709723034205e-19	b2	RNASET2
2.31833746684243e-23	-0.236477	0.107	0.449	5.4587573994272e-19	b2	ACAP2
2.33339170615464e-23	-1.3935	0.031	0.293	5.49420411131171e-19	b2	RHEX
2.56184386007812e-23	-0.175713	0.243	0.729	6.03211755293993e-19	b2	CHCHD2
2.6405267941453e-23	-1.32991	0.026	0.281	6.21738438949452e-19	b2	SNX10
2.73321304798008e-23	-0.661669	0.065	0.363	6.4356234427739e-19	b2	CHD2
3.12584915527368e-23	-1.08733	0.05	0.328	7.36012442100741e-19	b2	HDAC9
3.29684752473474e-23	-0.367238	0.12	0.467	7.76275718174042e-19	b2	GABARAPL2
3.45285092751011e-23	-0.174371	0.149	0.531	8.13008279391531e-19	b2	SET
3.60903678485503e-23	-0.771671	0.07	0.37	8.49783801361965e-19	b2	TBC1D22A
3.62978973424542e-23	-0.700622	0.05	0.329	8.54670290825427e-19	b2	DDAH2
3.68404908220527e-23	-0.523427	0.781	0.942	8.67446196896053e-19	b2	FAU
3.93378765603673e-23	-1.30149	0.039	0.307	9.26249641490408e-19	b2	RILPL2
3.947655987815e-23	-0.188516	0.099	0.432	9.29515078890919e-19	b2	SNRPG
4.91188516649243e-23	-0.342355	0.078	0.39	1.15655248130231e-18	b2	PPP2R1A
5.24239813852068e-23	-0.910969	0.052	0.333	1.23437506569608e-18	b2	CD55
5.51009525811153e-23	-0.998954	0.039	0.306	1.29740702947494e-18	b2	UQCRC2
5.80110535663958e-23	-0.178849	0.141	0.52	1.36592826727436e-18	b2	KHDRBS1
5.82083662354467e-23	-1.88785	0.065	0.347	1.37057419137983e-18	b2	HLA-DQA2
5.96349832785183e-23	-0.412875	0.081	0.392	1.40416531627599e-18	b2	HIF1A
6.00179783775074e-23	-1.38944	0.037	0.299	1.41318331887679e-18	b2	DENND5B
6.47432309042558e-23	-0.273662	0.107	0.444	1.52444411487161e-18	b2	ARHGAP25
6.7464943692364e-23	-0.384707	0.055	0.34	1.5885295641804e-18	b2	MDH1
7.05647366369411e-23	-0.982205	0.039	0.306	1.66151728885341e-18	b2	CYB561A3
7.36693450397758e-23	-2.90431	0.026	0.273	1.73461839830656e-18	b2	SOX5
7.63517718828028e-23	-0.589065	0.065	0.359	1.79777882075247e-18	b2	UPF2
8.82172101397738e-23	-0.538856	0.196	0.601	2.07716242995111e-18	b2	TSC22D3
9.0030291800153e-23	-0.155796	0.12	0.472	2.1198532507264e-18	b2	CUTA
1.01676863618374e-22	-0.814398	0.039	0.303	2.39408343075823e-18	b2	SS18L2
1.02429785601609e-22	-0.397554	0.097	0.421	2.41181173177548e-18	b2	LUC7L3
1.10554995043704e-22	-0.666177	0.063	0.353	2.60312791329906e-18	b2	NFKBIA
1.11967656215272e-22	-0.865172	0.055	0.334	2.63639043324479e-18	b2	ANXA7
1.17863772674309e-22	-0.290467	0.164	0.558	2.77522039138928e-18	b2	FDFT1
1.21204307624173e-22	-0.559951	0.057	0.341	2.85387662731877e-18	b2	PYURF
1.35298369293383e-22	-0.114446	0.157	0.541	3.185735403382e-18	b2	ARL6IP4
1.62838772938481e-22	-1.58095	0.042	0.305	3.83420174760948e-18	b2	CD83
1.62982056044557e-22	-1.32037	0.034	0.289	3.83757549162513e-18	b2	LSM2
1.72967925881785e-22	-0.385216	0.112	0.449	4.0727027828125e-18	b2	SSH2
1.76508682161032e-22	-0.163571	0.136	0.496	4.15607343016367e-18	b2	ARGLU1
1.79578362509769e-22	-0.634763	0.057	0.339	4.22835212365502e-18	b2	NDUFB7
2.01253119957588e-22	-0.533456	0.055	0.333	4.73870596252137e-18	b2	VPS51
2.10284499375204e-22	-0.194837	0.068	0.363	4.95135882228855e-18	b2	ARF5
2.1049347121451e-22	-0.100653	0.183	0.598	4.95627927321685e-18	b2	UBXN1
2.28600958171705e-22	-0.417959	0.07	0.367	5.38263816111096e-18	b2	GPBP1
2.3418599646869e-22	-0.251865	0.264	0.771	5.51414347285177e-18	b2	SRP14
2.53956614209536e-22	-0.217926	0.217	0.66	5.97966243817774e-18	b2	COX6B1
2.58457063479914e-22	-0.943628	0.371	0.765	6.08563001669805e-18	b2	HLA-DRB5
2.7391454741859e-22	-0.638508	0.07	0.364	6.44959193351811e-18	b2	RNASEH2B
2.79867636895075e-22	-0.649084	0.05	0.322	6.58976337833143e-18	b2	TNFRSF14
2.93087602072072e-22	-0.363839	0.073	0.368	6.90104067838901e-18	b2	CCT7
2.96738581771259e-22	-0.531043	0.086	0.395	6.98700664638606e-18	b2	TGFBR2
3.30358683098935e-22	2.81235	0.3	0.097	7.77862555224752e-18	b2	IGKV3-11
3.561957402325e-22	-0.380007	0.251	0.71	8.38698489951446e-18	b2	ARPC1B
3.60393868303377e-22	-0.271284	0.206	0.629	8.48583402307131e-18	b2	SMCHD1
3.67362584958547e-22	-1.68868	0.018	0.254	8.64991942543395e-18	b2	SEMA4B
3.91698202871835e-22	-1.00382	0.037	0.293	9.22292588482022e-18	b2	RAB11B
4.10628325545288e-22	-0.302585	0.081	0.385	9.66865455328936e-18	b2	PAIP2
4.1406416659384e-22	0.12727	0.112	0.448	9.74955486661855e-18	b2	ERH
4.1538844807986e-22	-0.128756	0.084	0.391	9.78073639848839e-18	b2	ATP6V1F
4.1973024667761e-22	-0.655357	0.415	0.854	9.882968388271e-18	b2	RPS11
4.19942182637118e-22	-0.158348	0.11	0.444	9.88795863237358e-18	b2	GNB2
4.42162704892414e-22	-1.19831	0.037	0.291	1.04111630493968e-17	b2	LYSMD2
4.51006391596339e-22	-0.576466	0.084	0.39	1.06193964965274e-17	b2	HMGN3
4.71291131001472e-22	-0.22989	0.107	0.437	1.10970209705607e-17	b2	TCF25
5.16033412688988e-22	-0.817524	0.044	0.307	1.21505227351749e-17	b2	NR1H2
5.35305521798023e-22	-0.149643	0.133	0.487	1.26043038162563e-17	b2	SAP18
6.4272489926145e-22	-0.386208	0.123	0.466	1.51336004780101e-17	b2	ELF1
6.69988287257486e-22	-0.26263	0.146	0.512	1.57755442117648e-17	b2	DYNLL1
6.90873483711853e-22	-2.20742	0.021	0.255	1.62673070474793e-17	b2	SETBP1
7.44921359920943e-22	-0.220792	0.094	0.409	1.75399183406985e-17	b2	PPIG
7.80349030595508e-22	-0.148959	0.099	0.419	1.83740982744018e-17	b2	WASF2
8.18219216118943e-22	-0.192589	0.146	0.515	1.92657896627366e-17	b2	TRBC2
8.49615064786172e-22	-0.115241	0.112	0.447	2.00050363154552e-17	b2	RBIS
8.5665773395037e-22	0.159208	0.154	0.53	2.01708630035954e-17	b2	C11orf58
8.80149750115097e-22	-0.129554	0.151	0.523	2.07240060162101e-17	b2	PEBP1
1.00448532538794e-21	-0.106316	0.099	0.419	2.36516114715845e-17	b2	REEP5
1.04531920471244e-21	-0.420581	0.969	0.967	2.4613085994159e-17	b2	RPS27
1.28284080700177e-21	-0.32093	0.097	0.412	3.02057696416637e-17	b2	OSTF1
1.29520594638616e-21	-0.910102	0.031	0.277	3.04969192136086e-17	b2	JPT1
1.29568613802394e-21	-1.21863	0.034	0.282	3.05082258059117e-17	b2	P2RY10
1.33365640623862e-21	-0.385439	0.321	0.791	3.14022737412946e-17	b2	HLA-DQB1
1.43189894722655e-21	-1.22216	0.034	0.282	3.37154926113963e-17	b2	EAF2
1.60752924199037e-21	-0.375194	0.068	0.353	3.78508835319052e-17	b2	PIAS1
1.7246778497167e-21	-0.154263	0.133	0.483	4.06092646494293e-17	b2	ATP5IF1
1.81396663569793e-21	4.33791	0.17	0.024	4.27116584041433e-17	b2	GIMAP4
1.8227544856607e-21	-0.144366	0.112	0.441	4.29185771193668e-17	b2	ATP5PB
1.8445112813462e-21	-0.601151	0.057	0.331	4.34308626305777e-17	b2	MBD4
2.07023614919815e-21	-0.421672	0.076	0.366	4.87457803690196e-17	b2	C1QBP
2.10057721531002e-21	-2.07393	0.018	0.246	4.94601911116898e-17	b2	COPDA1
2.11515616469729e-21	-0.377288	0.214	0.636	4.98034670539624e-17	b2	UCP2
2.24261205417637e-21	-0.456984	0.068	0.347	5.28045434276368e-17	b2	MIS18BP1
2.46217451158312e-21	-0.141993	0.172	0.559	5.79743610497362e-17	b2	GPX4
2.5637837503551e-21	-1.19708	0.029	0.268	6.03668521858612e-17	b2	RABEP1
2.78572977080014e-21	-0.108624	0.243	0.704	6.55927931832601e-17	b2	SUMO2
2.86398779358593e-21	-0.368619	0.128	0.467	6.74354565877743e-17	b2	SQSTM1
2.88489966221065e-21	-0.242838	0.099	0.414	6.7927847446412e-17	b2	BLOC1S1
2.99644516495382e-21	-1.94148	0.016	0.239	7.05542978540027e-17	b2	CERS4
3.1115832907477e-21	-0.404296	0.076	0.366	7.32653401639454e-17	b2	HDAC1
3.1696404168587e-21	-0.332335	0.052	0.319	7.4632353255355e-17	b2	MED10
3.26371541975919e-21	4.56955	0.146	0.014	7.68474432736499e-17	b2	LINC00861
3.46116348451652e-21	-0.385993	0.063	0.34	8.14965554064261e-17	b2	PGLS
3.61764298909068e-21	-0.121688	0.24	0.693	8.51810218211291e-17	b2	SNRPD2
3.79661426639266e-21	-0.536412	0.089	0.39	8.93950795164815e-17	b2	PPP3CA
4.02177859008355e-21	-2.89129	0.008	0.219	9.46967986821073e-17	b2	FCRL2
4.13860971684633e-21	-0.190226	0.097	0.408	9.74477043928637e-17	b2	EIF5
4.57947407576588e-21	-0.431913	0.05	0.31	1.07828296587983e-16	b2	WBP2
4.61626506876601e-21	-0.256645	0.068	0.347	1.08694577309164e-16	b2	HMGA1
4.64441308644625e-21	-1.30025	0.026	0.259	1.09357350533463e-16	b2	PIK3AP1
4.93442846752895e-21	-0.11036	0.107	0.427	1.16186052696437e-16	b2	SNRPB
4.94447745382378e-21	-0.348114	0.308	0.794	1.16422666127735e-16	b2	CLIC1
4.96116584148421e-21	-0.100197	0.146	0.501	1.16815610903587e-16	b2	MYCBP2
5.56678016645561e-21	-0.124528	0.159	0.533	1.31075405799364e-16	b2	STK17B
6.01051097091834e-21	-0.774604	0.039	0.288	1.41523491321243e-16	b2	RPS19BP1
6.14041964792626e-21	-0.450653	0.05	0.309	1.44582321030072e-16	b2	NEMF
6.1761689283589e-21	-0.251246	0.076	0.363	1.45424073587139e-16	b2	SCAMP2
6.22013611432292e-21	-0.365915	0.076	0.364	1.46459324947848e-16	b2	LAPTM4A
6.35646657001528e-21	-0.421569	0.065	0.342	1.4966936185758e-16	b2	NDUFS7
6.53348402104203e-21	-1.48135	0.023	0.254	1.53837414759456e-16	b2	NOTCH2
6.59898117566058e-21	-0.523927	0.06	0.332	1.55379610762104e-16	b2	ZC3H15
7.46401708927725e-21	-0.635822	0.052	0.313	1.75747746384122e-16	b2	SNX17
7.83278812575888e-21	-1.55176	0.013	0.23	1.84430829209119e-16	b2	OSER1
7.84811107964358e-21	0.191505	0.144	0.505	1.84791623481288e-16	b2	KRT10
7.90162178688036e-21	-1.87081	0.021	0.245	1.86051586593885e-16	b2	HLA-DOA
8.21169262745824e-21	-0.211232	0.097	0.402	1.93352514606132e-16	b2	AUP1
8.48081918618314e-21	-0.135647	0.238	0.687	1.99689368557868e-16	b2	UBB
9.44129146068565e-21	-0.232982	0.115	0.438	2.22304648733304e-16	b2	ATP5MPL
9.47972628573916e-21	0.554161	0.661	0.573	2.23209635124014e-16	b2	IGKC
1.03244864988671e-20	-0.684735	0.042	0.291	2.43100359102324e-16	b2	SINHCAF
1.04678555685504e-20	-0.21529	0.117	0.442	2.46476127217087e-16	b2	EPC1
1.16976331036016e-20	-0.982349	0.037	0.28	2.75432469057404e-16	b2	AFTPH
1.19315565110944e-20	-1.15031	0.031	0.268	2.8094042961023e-16	b2	SIK3
1.21615899041311e-20	-2.39858	0.031	0.263	2.86356795882671e-16	b2	PDE4D
1.22031148515531e-20	-0.616975	0.068	0.344	2.8733454229467e-16	b2	TRIM22
1.28310769497295e-20	-0.1675	0.107	0.424	3.02120537858331e-16	b2	YPEL3
1.38971046963561e-20	-1.95889	0.016	0.232	3.27221227180401e-16	b2	MKNK2
1.45440929736894e-20	-0.204269	0.196	0.598	3.42455213158491e-16	b2	ARL6IP5
1.48877665676286e-20	-0.304324	0.07	0.35	3.50547351601382e-16	b2	BAX
1.49997374295075e-20	-0.221948	0.099	0.406	3.53183817515184e-16	b2	KPNB1
1.62247220386434e-20	-1.01182	0.029	0.261	3.82027305121897e-16	b2	SIPA1L3
1.64521064729117e-20	-1.98728	0.021	0.243	3.87381299011179e-16	b2	SLC25A1
1.69077318297231e-20	-0.419481	0.06	0.327	3.9810945366266e-16	b2	SENP6
1.71780188501169e-20	-0.839967	0.368	0.741	4.04473631844853e-16	b2	LTB
1.75101727527667e-20	-2.78612	0.01	0.22	4.12294527636645e-16	b2	CD22
1.83857781917897e-20	-0.598932	0.047	0.299	4.32911533303881e-16	b2	PTK2B
2.02584246504643e-20	-0.242801	0.086	0.378	4.77004866819832e-16	b2	ARID4B
2.10979002262464e-20	-0.48656	0.052	0.308	4.96771158727197e-16	b2	COX14
2.43825549717376e-20	-0.539308	0.17	0.523	5.74111639364533e-16	b2	JUNB
2.48114442507946e-20	-2.2925	0.013	0.225	5.8421026632921e-16	b2	CD180
2.51849464083657e-20	3.8476	0.164	0.024	5.9300474813138e-16	b2	CD3D
2.53216183379905e-20	-2.05895	0.01	0.219	5.96222825386325e-16	b2	DOK3
2.79246635045823e-20	-0.981668	0.037	0.275	6.57514126878895e-16	b2	CCS
2.86989335385834e-20	-0.17724	0.094	0.393	6.75745089099486e-16	b2	RBM25
2.90248320289509e-20	-0.19664	0.12	0.443	6.83418694953677e-16	b2	WDR83OS
3.15125568037826e-20	-0.417297	0.285	0.759	7.41994662501866e-16	b2	RPL23
3.39373261061664e-20	-0.22285	0.086	0.379	7.99088280495794e-16	b2	TUBA4A
3.40678316877e-20	2.93549	0.441	0.276	8.02161164918585e-16	b2	HIST1H1E
3.42047538761213e-20	-0.630518	0.104	0.408	8.05385134767152e-16	b2	SEL1L3
3.55588724156106e-20	-7.80335	0	0.193	8.37269209897966e-16	b2	AL355076.2
3.57872305205178e-20	-1.05418	0.026	0.252	8.42646129836113e-16	b2	NFKB2
3.78753303805059e-20	-0.165338	0.076	0.355	8.91812529139392e-16	b2	FMNL1
4.24731436816833e-20	-0.142832	0.099	0.4	1.00007264112891e-15	b2	ARPC4
4.37844308246125e-20	-0.811186	0.039	0.28	1.03094820819633e-15	b2	CYB5R3
4.43617679945831e-20	-0.400435	0.953	0.962	1.04454218920045e-15	b2	RPL32
4.45530089719437e-20	-0.503046	0.076	0.352	1.04904514925339e-15	b2	CCNDBP1
4.5022653269869e-20	-0.121116	0.222	0.642	1.06010339389233e-15	b2	HERPUD1
4.50770065393305e-20	-0.880717	0.037	0.274	1.06138319597508e-15	b2	DNAJC10
4.55978111168746e-20	-0.365664	0.078	0.359	1.07364606055793e-15	b2	NIN
4.59666759056361e-20	-0.123814	0.068	0.34	1.08233135087411e-15	b2	ITGB7
4.88511137892294e-20	-0.389034	0.057	0.318	1.1502483252812e-15	b2	LYPLA1
4.93043326994883e-20	-0.965836	0.039	0.277	1.16091981774215e-15	b2	ADAM19
4.98965638821007e-20	-0.300242	0.07	0.345	1.17486449316794e-15	b2	HNRNPL
5.04794531046019e-20	-1.28893	0.026	0.251	1.18858920280096e-15	b2	ZNF296
5.61868982951505e-20	-0.513489	0.07	0.341	1.32297670725761e-15	b2	SREBF2
5.97867575452703e-20	-0.660112	0.042	0.282	1.40773899316093e-15	b2	RAPGEF1
6.36813973785754e-20	-0.682348	0.05	0.299	1.49944218267594e-15	b2	MOB3A
6.76982378721588e-20	-0.298088	0.097	0.395	1.59402270893785e-15	b2	AKAP9
6.7867065836841e-20	0.229939	0.172	0.551	1.59799793219426e-15	b2	ELOB
7.03051451568421e-20	-1.16077	0.042	0.281	1.65540494786301e-15	b2	JUN
7.12030574361913e-20	-1.13215	0.042	0.282	1.67654719039256e-15	b2	ZNF644
7.31933748958744e-20	-0.480411	0.044	0.288	1.72341120529826e-15	b2	GRINA
7.57912597827197e-20	-0.368631	0.065	0.331	1.78458100284392e-15	b2	CNPPD1
8.26655308742508e-20	-0.124036	0.052	0.305	1.94644258996511e-15	b2	ADD1
8.28854227858522e-20	-0.118252	0.102	0.406	1.95162016491568e-15	b2	TAF1D
8.57555820722788e-20	-0.339491	0.253	0.68	2.01920093547388e-15	b2	COTL1
8.69507535938344e-20	-0.215752	0.141	0.479	2.04734244412042e-15	b2	PRDX5
9.19752551679501e-20	-0.321607	0.076	0.352	2.16564935818455e-15	b2	FNBP4
9.46769615348287e-20	-0.21758	0.138	0.474	2.22926373629908e-15	b2	ST6GAL1
9.96955356062048e-20	-0.698013	0.05	0.297	2.3474310813837e-15	b2	DIPK1A
1.02700978981564e-19	-0.511594	0.06	0.319	2.41819725109991e-15	b2	SHOC2
1.08854863064031e-19	-0.291093	0.068	0.334	2.56309660570568e-15	b2	MRPS34
1.09491807849127e-19	-0.114915	0.084	0.367	2.57809410761555e-15	b2	OCIAD1
1.23741647060372e-19	-0.429028	0.162	0.52	2.91362082168352e-15	b2	FCHSD2
1.27888675075006e-19	-0.285067	0.089	0.376	3.01126674331609e-15	b2	NR3C1
1.32570297938448e-19	-1.41804	0.021	0.235	3.1215002352587e-15	b2	HHEX
1.34160410403074e-19	-0.138934	0.133	0.464	3.15894102335078e-15	b2	CSK
1.38072379338953e-19	-0.940291	0.086	0.364	3.25105224391498e-15	b2	MARCKSL1
1.41345454033661e-19	0.266006	0.157	0.514	3.32812006067658e-15	b2	ATP5ME
1.42838430019481e-19	-0.833347	0.039	0.274	3.36327367323871e-15	b2	RAB24
1.5077351334598e-19	-0.418728	0.901	0.951	3.55011314524445e-15	b2	RPS28
1.52137426839556e-19	-1.44084	0.044	0.282	3.58222785236419e-15	b2	DUSP1
1.60685634591348e-19	-0.247566	0.055	0.307	3.78350395208788e-15	b2	ANKRD13A
1.65038176812587e-19	-1.61371	0.023	0.241	3.88598891122918e-15	b2	CPNE5
1.66783417815136e-19	-0.300991	0.07	0.338	3.9270823558752e-15	b2	LSM8
1.68254742024115e-19	-1.41589	0.023	0.241	3.9617261556998e-15	b2	SNHG32
1.68555990164818e-19	-0.1906	0.081	0.36	3.9688193444208e-15	b2	PDCD6
1.7084411949248e-19	-1.06883	0.029	0.251	4.02269563756993e-15	b2	RHBDF2
1.74491906463215e-19	0.201215	0.159	0.518	4.10858642958286e-15	b2	PSMB8
1.80920101452233e-19	-0.110172	0.065	0.327	4.25994470879429e-15	b2	PDCD6IP
1.89714578224265e-19	-0.261579	0.073	0.342	4.46701945886855e-15	b2	BANF1
1.93445617132855e-19	-0.90523	0.037	0.268	4.5548705010102e-15	b2	TRA2A
1.93831287965423e-19	-0.385257	0.987	0.972	4.56395150643385e-15	b2	RPLP1
2.0046309533159e-19	-1.52869	0.01	0.211	4.72010404267761e-15	b2	PNOC
2.01862585215261e-19	-2.12068	0.016	0.222	4.75305643147854e-15	b2	BCL2A1
2.04152676147267e-19	-0.270716	0.076	0.347	4.80697891256355e-15	b2	SLTM
2.06705046161523e-19	0.108437	0.091	0.378	4.86707701691922e-15	b2	CYBB
2.09412903212305e-19	-0.516146	0.671	0.918	4.93083621903694e-15	b2	RPSA
2.11529261124954e-19	-0.227609	0.094	0.384	4.98066798244816e-15	b2	RHOH
2.12128605792735e-19	0.138842	0.204	0.609	4.99478015199574e-15	b2	UBE2D2
2.14462622575106e-19	0.117309	0.089	0.377	5.04973691115345e-15	b2	TUFM
2.20721563589643e-19	-0.345183	0.052	0.3	5.19710993628174e-15	b2	ARL5A
2.21322548961251e-19	-0.147333	0.07	0.336	5.21126073784161e-15	b2	SNHG5
2.33854727076033e-19	-0.125419	0.24	0.674	5.50634340373228e-15	b2	TMBIM6
2.41513063652946e-19	0.110887	0.099	0.396	5.68666659677227e-15	b2	NDUFB1
2.43250265248505e-19	-0.210438	0.06	0.316	5.7275707455413e-15	b2	MLF2
2.4460011163223e-19	0.257805	0.201	0.601	5.75935422849249e-15	b2	EDF1
2.54582337620646e-19	-0.21311	0.06	0.315	5.99439572161573e-15	b2	SF3A2
2.5571504310905e-19	-0.379468	0.35	0.838	6.0210664050457e-15	b2	SLC25A6
2.70419258029284e-19	0.113836	0.154	0.504	6.36729184955751e-15	b2	COX8A
2.75623991061464e-19	-0.48839	0.057	0.31	6.48984249353324e-15	b2	OFD1
3.00811970591047e-19	-0.130081	0.084	0.359	7.08291865953678e-15	b2	GRN
3.09166185290039e-19	-0.271811	0.104	0.399	7.27962699883925e-15	b2	SRSF10
3.23654437306611e-19	-0.447225	0.078	0.351	7.62076738082147e-15	b2	TOMM5
3.2454167896497e-19	-0.355398	0.037	0.267	7.64165837290917e-15	b2	TMEM134
3.37245830529807e-19	-0.452687	0.057	0.308	7.94079032565485e-15	b2	CCNL1
3.50658860827602e-19	-0.778581	0.047	0.287	8.25661353704671e-15	b2	RTF1
3.59911498097251e-19	-0.913965	0.037	0.265	8.47447613419787e-15	b2	SPINT2
3.714402595353e-19	-0.139832	0.099	0.391	8.74593235101818e-15	b2	TUT4
3.73192040756041e-19	-1.99363	0.016	0.219	8.78717979164175e-15	b2	TRIO
3.7565655473028e-19	-0.250596	0.086	0.365	8.84520923767918e-15	b2	DNAJC15
3.82239897866561e-19	-0.31414	0.076	0.346	9.00022063516605e-15	b2	AC119396.1
3.98957962495004e-19	-0.628001	0.063	0.318	9.39386418490737e-15	b2	CCDC18-AS1
4.2005105311045e-19	0.226954	0.144	0.485	9.89052209653865e-15	b2	GNAS
4.20232849585337e-19	-0.599226	0.068	0.327	9.89480267633634e-15	b2	PDE7A
4.22917738740518e-19	-3.60167	0.003	0.19	9.95802107638425e-15	b2	CNR2
4.32207540431278e-19	-0.340622	0.073	0.339	1.01767587469949e-14	b2	TBCB
4.62954322363878e-19	-0.443917	0.057	0.307	1.09007224743799e-14	b2	PNPLA2
4.68875186779076e-19	-0.39679	0.342	0.829	1.10401351479001e-14	b2	ARPC3
4.77190922408975e-19	-1.54208	0.029	0.246	1.12359374590417e-14	b2	SNX29
4.92897672631489e-19	-0.272368	0.073	0.338	1.1605768599781e-14	b2	SRSF4
5.0557367562871e-19	-0.264423	0.068	0.328	1.19042377663536e-14	b2	GPS2
5.1687913996313e-19	-0.309515	0.07	0.333	1.21704362295719e-14	b2	ATP2A3
5.43854486566232e-19	-0.243363	0.084	0.359	1.28055977406885e-14	b2	TMEM14B
5.79215429040074e-19	-3.23113	0.016	0.216	1.36382064921776e-14	b2	LINC01781
5.8235464566229e-19	-0.386524	0.044	0.278	1.37121224867643e-14	b2	SNAP23
5.85468066278559e-19	0.11141	0.131	0.453	1.3785431088595e-14	b2	PARK7
5.91852010990763e-19	-0.47242	0.055	0.301	1.39357474507885e-14	b2	CHD9
6.19386233642088e-19	-0.723886	0.044	0.28	1.45840682573366e-14	b2	UQCRC1
6.24858899136936e-19	-0.558325	0.039	0.269	1.47129276390783e-14	b2	MARCKS
6.49083568822286e-19	0.136698	0.131	0.456	1.52833217114895e-14	b2	PAK2
6.92684898421285e-19	-0.140211	0.06	0.312	1.63099586182276e-14	b2	TOMM22
7.07805039112498e-19	-0.131371	0.07	0.332	1.66659774509429e-14	b2	RNF181
7.5461507488113e-19	-0.38657	0.05	0.289	1.77681665531511e-14	b2	CARD11
7.72393560425156e-19	-0.290427	0.076	0.341	1.81867787737707e-14	b2	NDUFAF3
7.94126883019362e-19	-0.368004	0.068	0.323	1.86985115875739e-14	b2	DDT
8.03859097298599e-19	-0.146766	0.052	0.295	1.89276663049928e-14	b2	DNAJC4
9.0674678710371e-19	-0.434995	0.06	0.309	2.1350259849144e-14	b2	NCKAP1L
9.1459827664504e-19	0.265675	0.102	0.395	2.15351310218841e-14	b2	EIF2S2
9.57374994064116e-19	-0.929863	0.044	0.277	2.25423516102337e-14	b2	AC025164.1
9.7593003745982e-19	-1.85451	0.016	0.216	2.29792486620289e-14	b2	FAM49A
1.02685000952856e-18	-0.43983	0.057	0.303	2.41782103243595e-14	b2	PARVG
1.04047289848002e-18	-0.466493	0.047	0.282	2.44989748676106e-14	b2	SIPA1
1.04047316297961e-18	-0.628071	0.047	0.282	2.44989810955178e-14	b2	ARID1B
1.0634009150916e-18	0.230663	0.099	0.391	2.50388379467469e-14	b2	SRSF9
1.16721546123208e-18	0.220801	0.185	0.564	2.74832552501705e-14	b2	PSMA7
1.18456162903666e-18	-0.438499	0.859	0.94	2.78916881172971e-14	b2	RPS21
1.34346663819355e-18	-0.107656	0.065	0.32	3.16332654629054e-14	b2	ACP1
1.35857085602811e-18	-0.376424	0.065	0.318	3.19889093760379e-14	b2	LPXN
1.39492696058413e-18	-0.745114	0.044	0.276	3.2844950213914e-14	b2	BOD1L1
1.40389484618626e-18	-0.343375	0.06	0.309	3.30561080483016e-14	b2	PCNP
1.41562605717163e-18	-0.916146	0.037	0.259	3.33323311421631e-14	b2	SFT2D1
1.42544835606152e-18	-0.319864	0.057	0.302	3.35636069918246e-14	b2	MAP3K1
1.45875234123025e-18	-1.14056	0.034	0.254	3.43477826266074e-14	b2	RASSF2
1.51349541425867e-18	-0.192161	0.107	0.398	3.56367630241345e-14	b2	HADHA
1.5214551359944e-18	0.166346	0.206	0.607	3.58241826321242e-14	b2	COX5B
1.5290690788518e-18	-0.413637	0.316	0.767	3.60034605306445e-14	b2	RAC2
1.53332624819105e-18	-0.591842	0.044	0.276	3.61036998399066e-14	b2	PHF20
1.54815448741387e-18	-0.552712	0.042	0.27	3.6452845560647e-14	b2	RAB8A
1.54938092459404e-18	-0.105913	0.076	0.34	3.64817232504914e-14	b2	S1PR4
1.6042167475725e-18	-0.154015	0.065	0.319	3.7772887538342e-14	b2	KRAS
1.64072956883028e-18	-0.115086	0.201	0.586	3.86326184276778e-14	b2	ANKRD12
1.71720465195738e-18	-5.3673	0.003	0.184	4.04333007349884e-14	b2	LINC01857
1.93090829734402e-18	-0.17268	0.065	0.318	4.54651667692622e-14	b2	SIPA1L1
1.93196584999002e-18	-0.524706	0.063	0.31	4.5490067903865e-14	b2	SSNA1
1.938337390043e-18	5.01566	0.112	0.007	4.56400921859525e-14	b2	MS4A6A
1.96046957977867e-18	-2.95214	0.008	0.195	4.61612167254685e-14	b2	AL050309.1
2.12273272503936e-18	-0.451061	0.838	0.938	4.99818647437767e-14	b2	RPL8
2.45035774526823e-18	-0.673187	0.042	0.268	5.76961234700856e-14	b2	MCM5
2.51497997269134e-18	-0.271279	0.089	0.364	5.92177184369904e-14	b2	CCT8
2.52600868199036e-18	-0.755517	0.037	0.257	5.94774004261449e-14	b2	SLC44A2
2.52785094336325e-18	-0.640343	0.538	0.897	5.95207783124311e-14	b2	HLA-DRB1
2.56143257040632e-18	-0.229912	0.063	0.309	6.03114913027873e-14	b2	YWHAE
2.61552205857061e-18	-0.635814	0.042	0.267	6.15850823911037e-14	b2	USP8
2.68119531309549e-18	-0.496228	0.044	0.274	6.31314248421463e-14	b2	PDCD2
2.72153014010412e-18	0.164079	0.144	0.475	6.40811486788916e-14	b2	RSRP1
2.74870881639416e-18	-0.820055	0.037	0.257	6.47210977908168e-14	b2	CD81
2.75587843060979e-18	-1.21497	0.047	0.276	6.48899135271381e-14	b2	BACH2
2.80177078360862e-18	-0.627646	0.029	0.241	6.59704948708486e-14	b2	FAM3C
2.8224902062463e-18	-0.333111	0.063	0.31	6.64583543962753e-14	b2	ORMDL1
2.94015754978027e-18	-0.389379	0.06	0.306	6.92289496671263e-14	b2	NOP58
2.99319320152859e-18	-0.376357	0.057	0.3	7.04777271231921e-14	b2	PPP1R16B
3.02901834236172e-18	-0.578988	0.031	0.245	7.1321265889249e-14	b2	EIF6
3.07093755611102e-18	-1.15669	0.023	0.229	7.23082956961902e-14	b2	ITPR1
3.46850835607334e-18	-0.126221	0.091	0.367	8.1669497752103e-14	b2	BCLAF1
3.59618860160062e-18	-0.286824	0.042	0.267	8.46758568132883e-14	b2	TMED4
3.72891802577899e-18	0.29664	0.196	0.581	8.78011038349922e-14	b2	UBE2D3
3.86009166308786e-18	-0.224625	0.089	0.363	9.08897182990667e-14	b2	COX17
3.96691213649838e-18	-0.817409	0.034	0.25	9.34049131659908e-14	b2	C1GALT1
4.03923253676879e-18	-0.231571	0.081	0.345	9.5107769310758e-14	b2	TSTD1
4.05159466287034e-18	-0.271278	0.06	0.303	9.53988479319451e-14	b2	CCT2
4.1020024715232e-18	-0.730471	0.05	0.28	9.65857501944854e-14	b2	PWP1
4.19625186566054e-18	-0.42326	0.042	0.267	9.8804946428843e-14	b2	PPCS
4.22329744414412e-18	4.1859	0.178	0.037	9.94417616198173e-14	b2	KIF5C
4.394265614774e-18	-0.418655	0.499	0.868	1.03467378165469e-13	b2	HLA-DPB1
4.54276512947303e-18	-0.264359	0.06	0.303	1.06963947738572e-13	b2	PPHLN1
4.5521826194633e-18	4.0219	0.151	0.024	1.07185691957883e-13	b2	CD2
4.58490646553966e-18	-1.35701	0.021	0.222	1.07956207637597e-13	b2	GNB5
4.71578360745677e-18	-1.14242	0.026	0.232	1.11037840821177e-13	b2	SDCCAG8
4.89051141681519e-18	-0.116944	0.279	0.738	1.1515198182033e-13	b2	RNASEK
5.02805287834029e-18	-0.771118	0.047	0.276	1.183905330734e-13	b2	CSGALNACT1
5.08614342830747e-18	-0.418148	0.83	0.947	1.19758333162928e-13	b2	RPS7
5.09667152474018e-18	-1.31722	0.023	0.226	1.20006227721532e-13	b2	BLOC1S2
5.19945573465714e-18	0.183611	0.172	0.528	1.22426384728237e-13	b2	GNG5
5.49068366626514e-18	-1.00235	0.026	0.232	1.29283637605879e-13	b2	CTR9
5.7729662800642e-18	-4.90734	0.003	0.179	1.35930264030392e-13	b2	SIGLEC10
6.11497503327739e-18	-0.5357	0.06	0.299	1.43983202133549e-13	b2	TANK
6.65791758730055e-18	-0.700897	0.042	0.264	1.56767327510579e-13	b2	HECTD1
7.21339101236238e-18	-0.392085	0.042	0.264	1.69846504777085e-13	b2	ENY2
7.54808593746673e-18	-0.434231	0.044	0.269	1.77727231483592e-13	b2	MMADHC
7.55470768888584e-18	-0.837154	0.042	0.262	1.77883147242506e-13	b2	SHISAL2A
7.68038248986883e-18	0.295061	0.097	0.376	1.80842286106451e-13	b2	DNAJC8
7.96775684009018e-18	0.158744	0.133	0.45	1.87608802556763e-13	b2	NDUFB8
8.469774008743e-18	-0.189041	0.311	0.777	1.99429298809863e-13	b2	YWHAZ
8.49639909702358e-18	3.25895	0.154	0.025	2.00056213138517e-13	b2	GZMK
8.64641496096575e-18	0.137211	0.149	0.479	2.03588486670899e-13	b2	LRRFIP1
8.65589841917366e-18	-0.36599	0.063	0.305	2.03811784177863e-13	b2	ZNF207
8.81776246009034e-18	-0.933272	0.039	0.256	2.07623034885287e-13	b2	ITPR2
9.03434675817841e-18	-1.77667	0.013	0.201	2.12722728768069e-13	b2	PARVB
9.07421095819904e-18	-0.278801	0.078	0.336	2.13661371221755e-13	b2	CSNK1A1
9.10507009829218e-18	0.180797	0.136	0.448	2.14387980534388e-13	b2	TMEM59
9.67846013076437e-18	3.03322	0.269	0.097	2.27889022238978e-13	b2	IGHV3-7
1.00210275440066e-17	-0.475633	0.07	0.319	2.3595511455118e-13	b2	RSRC2
1.01573737223715e-17	0.201421	0.167	0.508	2.3916552166696e-13	b2	ATP5MF
1.02843083873846e-17	-0.355703	0.06	0.299	2.42154325289358e-13	b2	STUB1
1.07152232474309e-17	-1.32378	0.026	0.229	2.52300646584009e-13	b2	LRRK1
1.09549597098787e-17	-0.255711	0.047	0.273	2.57945481328804e-13	b2	SHFL
1.12937802239425e-17	-1.07266	0.021	0.217	2.65923349152949e-13	b2	PABPN1
1.13872925380486e-17	-0.375168	0.06	0.297	2.68125190100891e-13	b2	VPS29
1.18053175655357e-17	-0.633615	0.039	0.255	2.77968007398105e-13	b2	AP1B1
1.18831329218235e-17	-0.997026	0.029	0.232	2.79800247777257e-13	b2	PRKCD
1.21328601953532e-17	0.294744	0.117	0.414	2.85680326159786e-13	b2	BST2
1.2201975464552e-17	-0.155962	0.091	0.36	2.87307714288342e-13	b2	TMEM256
1.23174723697634e-17	-0.77795	0.039	0.256	2.90027204418449e-13	b2	TMEM131
1.24274867046648e-17	0.383104	0.123	0.424	2.92617601948037e-13	b2	NDUFV2
1.27694274191055e-17	-0.266916	0.076	0.327	3.00668938010259e-13	b2	SYTL1
1.28224525740324e-17	-2.26594	0.013	0.199	3.01917468308167e-13	b2	CXCR5
1.30716757702136e-17	-5.36814	0.003	0.175	3.0778567768545e-13	b2	ANGPTL1
1.32483378504045e-17	-0.497835	0.039	0.256	3.11945363025626e-13	b2	MRPS18B
1.34281396223262e-17	0.183173	0.24	0.673	3.16178975547292e-13	b2	CNBP
1.35085443087418e-17	0.144426	0.076	0.331	3.18072184293636e-13	b2	TRAPPC5
1.39567739571562e-17	-0.734659	0.128	0.414	3.28626199595199e-13	b2	LGALS1
1.4106167540635e-17	-0.102533	0.128	0.43	3.32143820911793e-13	b2	ATRX
1.42547032114576e-17	-0.684129	0.031	0.239	3.35641241816981e-13	b2	PIP5K1B
1.42726237789628e-17	-0.610447	0.037	0.25	3.36063199499459e-13	b2	TBC1D9
1.52293004635014e-17	-0.395423	0.047	0.271	3.58589108713604e-13	b2	NASP
1.54495601082298e-17	-1.87847	0.013	0.199	3.63775342308378e-13	b2	DPY30
1.55308773543851e-17	-0.319625	0.068	0.312	3.65690038186351e-13	b2	HAX1
1.57129164068562e-17	-0.262046	0.06	0.299	3.69976329715837e-13	b2	RHOF
1.60724228687613e-17	-0.166035	0.06	0.299	3.78441268867853e-13	b2	SMARCC1
1.62397953688612e-17	-0.470358	0.449	0.873	3.82382221755205e-13	b2	PFDN5
1.66972482066808e-17	0.257381	0.089	0.355	3.93153406274507e-13	b2	SSB
1.70868706901735e-17	0.130672	0.078	0.335	4.02327457270825e-13	b2	TPM4
1.74574513160602e-17	0.125339	0.094	0.366	4.11053148687952e-13	b2	CCT3
1.78490514878799e-17	0.14351	0.104	0.386	4.20273766333621e-13	b2	PGAM1
1.90941199488901e-17	-0.105217	0.052	0.281	4.49590148316566e-13	b2	PHF1
1.91304059237609e-17	-0.523871	0.052	0.28	4.50444537880875e-13	b2	CCT5
1.94311053797133e-17	-0.22638	0.081	0.335	4.5752480727073e-13	b2	IRF9
1.96011078524155e-17	0.11013	0.06	0.297	4.61527685492975e-13	b2	GADD45GIP1
2.01428143904796e-17	-3.27525	0.005	0.18	4.74282707638232e-13	b2	FAM43A
2.02532913413828e-17	-1.45084	0.018	0.21	4.76883997924199e-13	b2	TLE1
2.0601422286714e-17	-0.300783	0.065	0.305	4.85081089162968e-13	b2	C7orf50
2.22167459885937e-17	-0.5607	0.052	0.28	5.23115501047427e-13	b2	YPEL5
2.24569904680499e-17	-0.376614	0.055	0.286	5.28772297560702e-13	b2	RNASEH2C
2.44278734726591e-17	-0.989658	0.031	0.236	5.7517870878723e-13	b2	DNAJC19
2.5114300093935e-17	0.301907	0.091	0.359	5.91341310011793e-13	b2	SSBP1
2.51316403600892e-17	-0.242293	0.172	0.495	5.91749603918659e-13	b2	GSTP1
2.51988951361864e-17	-0.110482	0.052	0.281	5.93333184876646e-13	b2	ELOC
2.52059312455577e-17	-0.443189	0.065	0.305	5.93498857107901e-13	b2	NHP2
2.67705558467049e-17	-1.83245	0.013	0.197	6.30339507966515e-13	b2	ZNHIT3
2.68095664234875e-17	-0.559845	0.042	0.258	6.31258051007437e-13	b2	PAN3
2.78177963775991e-17	0.19484	0.204	0.585	6.54997833506949e-13	b2	SF1
3.04075635983827e-17	-0.433229	0.05	0.274	7.15976492487519e-13	b2	RBCK1
3.05515782971612e-17	-0.737413	0.047	0.267	7.19367462584958e-13	b2	UBE2G1
3.07689798103321e-17	0.105327	0.185	0.546	7.2448639861408e-13	b2	DDX17
3.08360862892778e-17	-0.481131	0.047	0.269	7.26066487767336e-13	b2	MEA1
3.11660000057897e-17	-0.517024	0.05	0.271	7.33834636136324e-13	b2	EMC4
3.29633136136705e-17	-0.987738	0.023	0.219	7.76154182347485e-13	b2	PIP4P1
3.32877648420715e-17	-0.587487	0.039	0.251	7.83793710971416e-13	b2	TINF2
3.36656096582926e-17	0.195958	0.102	0.377	7.92690445014159e-13	b2	MOB1A
3.38031408212548e-17	-0.540798	0.039	0.251	7.95928753777266e-13	b2	FAM13B
3.43556143964018e-17	0.291489	0.086	0.347	8.08937296577676e-13	b2	SELENOT
3.50242351038304e-17	0.152331	0.128	0.428	8.2468063975479e-13	b2	TALDO1
3.60815902194055e-17	-1.09862	0.034	0.238	8.49577123306122e-13	b2	PPP1R7
4.11956602472336e-17	-0.168616	0.047	0.268	9.69993016181362e-13	b2	RBBP6
4.18713349298547e-17	-0.269039	0.06	0.294	9.85902452258359e-13	b2	CNPY2
4.24584946186156e-17	-0.510341	0.057	0.288	9.99727714289922e-13	b2	KDM4C
4.41024833073617e-17	-0.182011	0.052	0.278	1.03843707195514e-12	b2	UBE3A
4.42487357103212e-17	-0.570512	0.037	0.245	1.04188073103522e-12	b2	PNKD
4.4903357647451e-17	-0.141017	0.068	0.308	1.05729445916688e-12	b2	DGUOK
4.53056329795904e-17	0.383856	0.178	0.533	1.06676643413744e-12	b2	UQCR10
4.54472430911723e-17	-0.819757	0.021	0.212	1.07010078582474e-12	b2	MRPL38
4.72290192704043e-17	-0.174972	0.044	0.262	1.11205448774094e-12	b2	DCAF7
4.73768575224085e-17	-1.49606	0.018	0.206	1.11553548722263e-12	b2	SCPEP1
4.8203397765187e-17	-2.56328	0.008	0.182	1.13499720377909e-12	b2	MICAL3
4.99658545716169e-17	-0.128948	0.07	0.314	1.17649601174329e-12	b2	ZNF638
5.15330971460358e-17	0.361914	0.164	0.505	1.21339830540056e-12	b2	NDUFB2
5.18024349306495e-17	-0.590917	0.039	0.25	1.21974013287707e-12	b2	IRF7
5.34338026051938e-17	-0.268201	0.06	0.293	1.25815231614189e-12	b2	CRLF3
5.37347320684533e-17	-0.327606	0.057	0.287	1.2652380012838e-12	b2	CHMP4A
5.71658334182943e-17	-0.350903	0.052	0.276	1.34602671366716e-12	b2	RBM17
5.76290588223516e-17	-0.182844	0.055	0.282	1.35693381903109e-12	b2	VPS36
5.79909494699487e-17	0.165772	0.18	0.528	1.36545489621941e-12	b2	GDI2
5.80677252612306e-17	-0.470155	0.052	0.276	1.36726265900093e-12	b2	EHMT1
5.81116185844188e-17	-0.7852	0.023	0.217	1.36829617118872e-12	b2	PRKD3
5.83826209698659e-17	-0.267555	0.06	0.293	1.37467719335646e-12	b2	CACYBP
5.84934144375879e-17	-1.25888	0.029	0.226	1.37728593634744e-12	b2	RRP7A
5.87480975660843e-17	-3.20866	0.008	0.181	1.38328270529102e-12	b2	ZNF860
6.14939805195667e-17	-0.207871	0.078	0.326	1.44793726531372e-12	b2	CCT6A
6.20325395102574e-17	-0.341449	0.909	0.96	1.46061817530852e-12	b2	RPL19
6.22303948727119e-17	-0.695255	0.039	0.249	1.46527687767288e-12	b2	PSMB4
6.57287452184546e-17	-0.493644	0.05	0.27	1.54764903491373e-12	b2	GTF2I
6.66923485991469e-17	-0.990059	0.026	0.222	1.57033804011551e-12	b2	CCR6
6.84202725618399e-17	-0.101257	0.245	0.658	1.61102373774108e-12	b2	GPSM3
6.99398186195659e-17	-0.785968	0.037	0.243	1.6468029692163e-12	b2	PSMC4
7.92959763075223e-17	-0.548086	0.037	0.243	1.86710305813692e-12	b2	DMXL1
8.00403077657725e-17	-1.10224	0.026	0.22	1.88462908665288e-12	b2	ELOVL1
8.33815613399663e-17	0.214983	0.175	0.521	1.96330224331085e-12	b2	PGK1
8.4918256718216e-17	-0.789316	0.031	0.231	1.99948527268711e-12	b2	HSPH1
8.51519593174319e-17	-0.730015	0.039	0.246	2.00498803408825e-12	b2	UBE2E2
8.52845365925704e-17	-0.379689	0.044	0.258	2.00810969860866e-12	b2	PMPCB
8.54378973178413e-17	0.243001	0.115	0.399	2.01172073024589e-12	b2	NDUFB10
9.0604163741471e-17	0.295192	0.099	0.371	2.13336563945668e-12	b2	SEM1
9.1646994438678e-17	-0.235755	0.063	0.294	2.15792013105311e-12	b2	MGST3
9.30157999010756e-17	-0.604227	0.029	0.225	2.19015002447073e-12	b2	RNF114
9.71485223977429e-17	-0.115213	0.073	0.314	2.28745910837725e-12	b2	TAF7
1.00669945599221e-16	-0.30176	0.06	0.289	2.37037453907927e-12	b2	FNTA
1.0233726139525e-16	-0.82933	0.031	0.23	2.40963315681256e-12	b2	RIPOR1
1.04202342998541e-16	-1.60096	0.018	0.203	2.45354836824365e-12	b2	FAM117B
1.0474861676493e-16	0.178418	0.136	0.436	2.46641093034704e-12	b2	NDUFC2
1.05862846421528e-16	0.325356	0.175	0.521	2.49264658184129e-12	b2	ARF1
1.12545016268492e-16	-1.04801	0.026	0.219	2.64998495305792e-12	b2	DUSP22
1.15923424386093e-16	-0.206208	0.068	0.302	2.72953295059495e-12	b2	MRPS6
1.18160551421874e-16	-1.56969	0.013	0.191	2.78220834377945e-12	b2	USP6NL
1.25955741764418e-16	-0.233034	0.052	0.273	2.96575389558499e-12	b2	TMEM109
1.26904584834557e-16	-0.623631	0.037	0.241	2.98809535451448e-12	b2	FIP1L1
1.41396068049792e-16	-0.395364	0.809	0.934	3.3293118183004e-12	b2	RPLP2
1.42260736192139e-16	-0.432033	0.363	0.8	3.3496712943801e-12	b2	CORO1A
1.4467682341666e-16	-0.583246	0.044	0.255	3.40656048416868e-12	b2	FERMT3
1.49531325047873e-16	0.209422	0.068	0.305	3.52086457957722e-12	b2	BASP1
1.51543491695124e-16	-0.424213	0.05	0.267	3.56824305545339e-12	b2	TMEM131L
1.63281496251754e-16	-1.00771	0.026	0.218	3.84462611074379e-12	b2	MGMT
1.68823890827011e-16	-1.62008	0.013	0.188	3.97512733341279e-12	b2	RFX5
1.69402546809882e-16	-1.38636	0.016	0.194	3.98875236718547e-12	b2	TMEM273
1.7020180154551e-16	-0.759066	0.023	0.212	4.00757161919057e-12	b2	COMMD1
1.7596630558129e-16	-0.467494	0.721	0.923	4.14330263121704e-12	b2	RPS5
1.81105759414728e-16	-1.48012	0.018	0.2	4.26431621117919e-12	b2	ATG16L2
1.94429515863663e-16	-0.236297	0.055	0.276	4.57803738052581e-12	b2	MFF
1.95765105520209e-16	-0.366365	0.914	0.948	4.60948517457885e-12	b2	RPS27A
1.97665788272913e-16	0.205865	0.11	0.386	4.65423865067401e-12	b2	TAX1BP1
2.01726541537797e-16	-0.564777	0.044	0.254	4.74985314704897e-12	b2	DENND4A
2.09392723516482e-16	-0.515603	0.593	0.911	4.93036106791907e-12	b2	EEF1B2
2.14736034988765e-16	-0.577858	0.039	0.244	5.05617467984546e-12	b2	TIMM17B
2.21082855523626e-16	-0.439207	0.05	0.264	5.20561691615931e-12	b2	MORC3
2.22761189971782e-16	-0.206792	0.06	0.287	5.24513497907558e-12	b2	PHKB
2.23854675287850e-16	-1.20452	0.023	0.21	5.2708821843277e-12	b2	FAM214A
2.29942187265592e-16	-0.305137	0.044	0.255	5.41421874135563e-12	b2	RNF19A
2.30113823164097e-16	0.291808	0.117	0.399	5.41826008022182e-12	b2	MICOS10
2.30235121749802e-16	0.206525	0.188	0.543	5.42111617672084e-12	b2	EIF3G
2.37554217947498e-16	4.89522	0.138	0.023	5.5934516157918e-12	b2	FCER1G
2.41445855570434e-16	-0.157544	0.063	0.29	5.68508411526145e-12	b2	DCK
2.41894295730151e-16	0.125543	0.112	0.387	5.69564308726213e-12	b2	TRAM1
2.50501747216804e-16	0.1514	0.11	0.385	5.89831413996686e-12	b2	CIAO2B
2.55823798952914e-16	-1.02313	0.031	0.226	6.02362717014531e-12	b2	LPGAT1
2.59270646296749e-16	-0.637371	0.044	0.252	6.10478663770326e-12	b2	TRAF5
2.64190828109263e-16	-1.63362	0.016	0.193	6.22063723866071e-12	b2	TEX9
2.6537291184042e-16	-1.58776	0.018	0.198	6.24847058219453e-12	b2	RAB30
2.83128298244358e-16	-0.174619	0.06	0.284	6.66653891046166e-12	b2	ZNF24
2.87757318783095e-16	-0.348151	0.044	0.254	6.77553382806675e-12	b2	PSMD13
2.88507247132475e-16	-0.172517	0.094	0.351	6.79319164098125e-12	b2	ASH1L
3.03407377174191e-16	-0.407846	0.039	0.242	7.1440301029435e-12	b2	AKIRIN2
3.18138746700234e-16	-1.34944	0.029	0.219	7.4908949298037e-12	b2	SELENOM
3.21656017872186e-16	0.33284	0.162	0.485	7.57371259681849e-12	b2	XRCC5
3.29317979244316e-16	0.176467	0.094	0.353	7.75412113928667e-12	b2	CYBC1
3.322142355773e-16	-1.39472	0.018	0.198	7.82231639090311e-12	b2	THEMIS2
3.35910746172303e-16	-0.396941	0.037	0.237	7.90935442937305e-12	b2	PLEKHO1
3.40309126101253e-16	0.153812	0.117	0.397	8.0129186831801e-12	b2	SEC61G
3.45861043905218e-16	-0.199082	0.057	0.28	8.14364413979225e-12	b2	CNTRL
3.62909858032631e-16	0.219764	0.125	0.411	8.54507551723633e-12	b2	RBX1
3.64303750194244e-16	-1.0881	0.031	0.225	8.57789610207367e-12	b2	WASHC1
3.68524466954847e-16	-0.139768	0.07	0.306	8.67727709891882e-12	b2	IDI1
3.72561042111472e-16	0.226883	0.133	0.43	8.77232229755672e-12	b2	SRSF2
3.88761780276905e-16	-1.04901	0.023	0.209	9.15378487840001e-12	b2	GTF2E2
3.92354399420463e-16	0.216545	0.146	0.454	9.23837668875421e-12	b2	SRRM2
3.95292470815741e-16	-0.20984	0.034	0.231	9.30755651782743e-12	b2	PPP1R11
4.04247473690212e-16	0.268816	0.094	0.352	9.51841101550973e-12	b2	OXA1L
4.27141328516068e-16	-0.153006	0.065	0.294	1.00574697212393e-11	b2	VPS35
4.31203223787616e-16	-0.216137	0.055	0.271	1.01531111073032e-11	b2	MYO1G
4.32964518699664e-16	-0.554319	0.055	0.271	1.01945825573023e-11	b2	AFF4
4.3693024164427e-16	-0.245777	0.068	0.297	1.0287959469756e-11	b2	VPS4B
4.36959536556491e-16	0.252559	0.225	0.617	1.02886492477591e-11	b2	SSR2
4.37999142134215e-16	-0.266859	0.047	0.257	1.03131278006922e-11	b2	SP140L
4.40170189375957e-16	-0.611371	0.392	0.801	1.03642472790463e-11	b2	ZFP36L2
4.47072878952123e-16	0.270711	0.185	0.537	1.05267780078067e-11	b2	SLC25A5
4.51974151626222e-16	-1.41258	0.018	0.197	1.0642183374191e-11	b2	RNF141
4.65639775359201e-16	-0.599205	0.034	0.23	1.09639541506078e-11	b2	PIKFYVE
4.66046881491992e-16	-1.17218	0.034	0.229	1.09735398716104e-11	b2	MGAT5
4.74543495000268e-16	-0.29241	0.052	0.267	1.11736011332763e-11	b2	ALKBH5
4.75252374122924e-16	-1.91086	0.013	0.185	1.11902924010984e-11	b2	BLCAP
4.83582461105401e-16	-0.190677	0.287	0.72	1.13864326291878e-11	b2	PPDPF
4.85061962947137e-16	-0.733395	0.042	0.245	1.14212689795533e-11	b2	ITFG1
4.86137578285583e-16	0.141776	0.084	0.331	1.14465954183123e-11	b2	SEC11A
4.92795232158226e-16	-0.400075	0.386	0.859	1.16033565363976e-11	b2	UBC
4.95362441632464e-16	-0.871641	0.037	0.235	1.1663804050678e-11	b2	CHD7
4.96874024013569e-16	-0.404465	0.044	0.25	1.16993957694235e-11	b2	WAC
5.12996478587856e-16	-0.313944	0.052	0.267	1.20790150848297e-11	b2	STAG1
5.20407080081721e-16	-0.128094	0.052	0.267	1.22535051076042e-11	b2	PSMG2
5.20936452097172e-16	-0.544807	0.037	0.233	1.226596970108e-11	b2	RASSF1
5.4739426638265e-16	-0.612073	0.037	0.235	1.28889453962459e-11	b2	PTRHD1
5.48583224205906e-16	-0.458595	0.037	0.235	1.29169405971523e-11	b2	SPG21
5.58089270040957e-16	-0.911631	0.029	0.218	1.31407699523844e-11	b2	JPX
5.68950130181434e-16	-1.15601	0.021	0.201	1.3396499765252e-11	b2	APOBEC3C
5.73708259183361e-16	-0.240344	0.057	0.277	1.35085346707314e-11	b2	MAF1
5.79498579549805e-16	-0.343211	0.065	0.291	1.36448735540797e-11	b2	AC092821.3
5.99166596276788e-16	-0.388765	0.034	0.227	1.41079766759332e-11	b2	ERAP2
6.05189428784609e-16	-1.31511	0.021	0.2	1.42497902901624e-11	b2	RCN2
6.07669144682921e-16	0.167448	0.086	0.334	1.43081776807041e-11	b2	PPP1R2
6.17331969933028e-16	-0.312579	0.992	0.986	1.45356985640431e-11	b2	EEF1A1
6.35700758775794e-16	0.265563	0.104	0.371	1.49682100661349e-11	b2	CCDC85B
6.6380638391756e-16	0.121369	0.232	0.628	1.56299851157229e-11	b2	CD48
6.6849012957549e-16	-0.397963	0.042	0.243	1.57402685909845e-11	b2	SDHC
6.80509248285568e-16	-0.868241	0.034	0.227	1.6023270760132e-11	b2	SARNP
6.87230556855966e-16	-0.374595	0.039	0.238	1.61815306917306e-11	b2	PHB
6.99701368630325e-16	0.196074	0.117	0.396	1.64751684257696e-11	b2	USP15
7.11487679328439e-16	-1.31253	0.016	0.188	1.67526888974674e-11	b2	SDHB
7.32038584898147e-16	-0.354363	0.896	0.948	1.72365805200118e-11	b2	RPL37
7.37715094312324e-16	0.18526	0.183	0.521	1.7370239610678e-11	b2	ALDOA
7.49896880653676e-16	-0.628334	0.029	0.217	1.76570719518715e-11	b2	NBDY
7.53735454066477e-16	0.180819	0.193	0.545	1.77474550014493e-11	b2	ARPC5
7.89758069017374e-16	-1.56485	0.016	0.188	1.85956434930831e-11	b2	RABEP2
8.21801510525534e-16	-0.338168	0.052	0.264	1.93501383668342e-11	b2	THOC2
8.39189925779999e-16	-0.290432	0.047	0.255	1.97595659924159e-11	b2	PTOV1
8.71770073539889e-16	-0.723548	0.037	0.231	2.05266981515702e-11	b2	ACO2
9.06396999139904e-16	-0.253544	0.065	0.289	2.13420237417482e-11	b2	EAPP
9.21656859957342e-16	0.404494	0.193	0.551	2.17013324245556e-11	b2	HNRNPF
9.40642336065728e-16	-1.08293	0.023	0.205	2.21483644450036e-11	b2	HCP5
9.50560727160222e-16	-0.878406	0.039	0.236	2.23819028817146e-11	b2	PHPT1
9.51231955318208e-16	0.188249	0.198	0.556	2.23977076199225e-11	b2	IFITM2
9.54272140915709e-16	-0.586885	0.034	0.226	2.24692918300013e-11	b2	KDM4B
9.62499680595984e-16	-0.232786	0.076	0.312	2.2663017479313e-11	b2	SETX
9.62853690980319e-16	-0.645163	0.042	0.243	2.26713530078226e-11	b2	BAZ2A
9.73218123459322e-16	-0.38376	0.366	0.819	2.29153939349732e-11	b2	LSP1
1.0256701601324e-15	-0.510228	0.091	0.335	2.41504295904775e-11	b2	PLEK
1.03322027976266e-15	-4.1598	0.003	0.158	2.43282047072916e-11	b2	PPP1R14A
1.03587004797649e-15	-0.487942	0.037	0.232	2.43905961496544e-11	b2	ANTKMT
1.03592510465414e-15	-3.71471	0.003	0.158	2.43918925141864e-11	b2	GRK3
1.04598093035524e-15	-0.523205	0.034	0.226	2.46286669861444e-11	b2	NUDT4
1.06274391558185e-15	-1.37449	0.029	0.213	2.50233682362901e-11	b2	RBM38
1.07412875498493e-15	0.243571	0.102	0.364	2.52914356648752e-11	b2	MDH2
1.11431672026116e-15	-0.632166	0.034	0.226	2.62377014952693e-11	b2	ARID1A
1.12496502111709e-15	0.178424	0.081	0.321	2.64884263872231e-11	b2	RAB5C
1.12527940191514e-15	-1.21073	0.023	0.203	2.64958287974938e-11	b2	ITFG2
1.12817466999759e-15	-0.122233	0.078	0.314	2.65640007797633e-11	b2	APPL1
1.13178770233731e-15	-1.27486	0.023	0.204	2.66490732392343e-11	b2	SPOP
1.15051594063758e-15	-0.255081	0.081	0.316	2.70900483382524e-11	b2	APEX1
1.1855806047141e-15	0.252718	0.157	0.47	2.79156809185982e-11	b2	C4orf3
1.20716695452371e-15	-0.238983	0.065	0.288	2.84239531112153e-11	b2	UQCRFS1
1.233917812301e-15	-0.548252	0.031	0.22	2.90538288084393e-11	b2	SPG11
1.30996253787914e-15	0.174162	0.125	0.408	3.08443779169021e-11	b2	PSIP1
1.30999577760464e-15	-0.809904	0.039	0.235	3.08451605794788e-11	b2	DGKD
1.3479743212727e-15	-1.3497	0.018	0.192	3.1739403368687e-11	b2	RELB
1.37025117773515e-15	0.389189	0.17	0.496	3.22639342309518e-11	b2	EIF4G2
1.44004575194316e-15	-0.212786	0.052	0.262	3.39073172752536e-11	b2	CEP57
1.44273843045124e-15	0.146646	0.065	0.289	3.39707190834049e-11	b2	TXNL1
1.47414304586292e-15	0.200474	0.07	0.297	3.47101721578882e-11	b2	AP2S1
1.70417690327479e-15	-1.1836	0.026	0.207	4.01265493645082e-11	b2	CLIC4
1.70568201341997e-15	0.118192	0.11	0.372	4.01619886879867e-11	b2	DDX39B
1.71597571254134e-15	0.229971	0.206	0.566	4.04043641274983e-11	b2	CAPZB
1.73085042454564e-15	0.307593	0.084	0.326	4.07546040963515e-11	b2	GNAI2
1.75534346269106e-15	-0.421439	0.042	0.239	4.13313171725237e-11	b2	PFKL
1.87926349950522e-15	-0.146591	0.055	0.267	4.42491383593498e-11	b2	OIP5-AS1
1.88494266641381e-15	-0.119742	0.063	0.28	4.43828600233795e-11	b2	TAP2
1.89703369192766e-15	0.237972	0.151	0.459	4.46675553101288e-11	b2	COPE
1.9972299505814e-15	-2.02728	0.01	0.173	4.70267764163896e-11	b2	AC007384.1
1.99966203785721e-15	0.218671	0.097	0.347	4.70840423433859e-11	b2	SSU72
2.03767275673035e-15	-0.536803	0.037	0.229	4.79790427299727e-11	b2	SLC25A39
2.08155536599412e-15	0.271096	0.107	0.368	4.90123026476976e-11	b2	TPR
2.1026604748857e-15	-0.709656	0.034	0.223	4.95092435416586e-11	b2	ETFB
2.11782654470507e-15	-0.549281	0.031	0.218	4.98663438216255e-11	b2	SMIM7
2.1293300424398e-15	4.16408	0.11	0.012	5.01372051792875e-11	b2	CD7
2.13423495283446e-15	0.309297	0.251	0.659	5.02526961994401e-11	b2	NCL
2.16663333970187e-15	-1.46356	0.016	0.184	5.10155486166201e-11	b2	DUS2
2.24994675527203e-15	-1.38011	0.026	0.205	5.29772462996351e-11	b2	NGDN
2.30610974767452e-15	-0.136979	0.081	0.315	5.42996601187443e-11	b2	TAP1
2.34890987401047e-15	-2.53533	0.01	0.172	5.53074318934504e-11	b2	SNED1
2.35348248948332e-15	-0.844798	0.026	0.206	5.54150986973742e-11	b2	ZDHHC21
2.38464447573587e-15	0.227476	0.123	0.398	5.61488388256768e-11	b2	ARHGEF1
2.41096891934047e-15	-0.427331	0.042	0.238	5.67686741747908e-11	b2	TMEM248
2.57193563415961e-15	-0.186507	0.065	0.284	6.05587964419222e-11	b2	SPSB3
2.57741266369453e-15	-0.43397	0.285	0.664	6.06877585793515e-11	b2	CRIP1
2.58855025301532e-15	0.208458	0.102	0.359	6.09500042574987e-11	b2	COX7A2L
2.6130904637798e-15	-1.00858	0.084	0.312	6.15278280601592e-11	b2	CCR7
2.63028960197552e-15	-0.345727	0.063	0.278	6.19327989681156e-11	b2	PLAC8
2.80992609468184e-15	0.225495	0.141	0.434	6.61625198253785e-11	b2	HP1BP3
3.0171200709969e-15	-0.363256	0.05	0.254	7.1041109191693e-11	b2	SECISBP2
3.08021805178411e-15	-0.336374	0.948	0.955	7.25268142473088e-11	b2	RPL30
3.2170222189312e-15	-0.230716	0.057	0.268	7.5748005166954e-11	b2	GPATCH8
3.24468236710084e-15	0.201033	0.078	0.312	7.63992910157564e-11	b2	STAT3
3.30164101472183e-15	-1.27633	0.016	0.182	7.77404393326401e-11	b2	UIMC1
3.42937898898171e-15	-0.144268	0.06	0.274	8.07481576745634e-11	b2	HPS1
3.43225080734325e-15	0.25876	0.123	0.398	8.08157775097042e-11	b2	GLIPR1
3.47741718351668e-15	-0.504668	0.05	0.252	8.18792650030838e-11	b2	STAT6
3.61749691200829e-15	-2.71972	0.01	0.169	8.51775822901472e-11	b2	C11orf24
3.61957867608867e-15	-0.520169	0.031	0.216	8.52265995071837e-11	b2	FBXW11
3.62541902919033e-15	-0.318813	0.037	0.226	8.53641164613155e-11	b2	BICD1
3.78864689574177e-15	-1.06939	0.023	0.198	8.92074798071357e-11	b2	DDX50
3.80162225132184e-15	0.18297	0.084	0.321	8.9512997529624e-11	b2	EMD
3.8665437857157e-15	-0.399043	0.039	0.231	9.10416399784618e-11	b2	AAMP
4.0610047235327e-15	-0.719114	0.029	0.21	9.56204172203009e-11	b2	POLR2F
4.08819745157709e-15	-0.132326	0.057	0.268	9.62606971948342e-11	b2	OGFR
4.33977717205504e-15	-2.09294	0.01	0.169	1.02184393293208e-10	b2	NBPF14
4.43257602369632e-15	-0.803758	0.039	0.23	1.04369435053954e-10	b2	SETD5
4.53643146859614e-15	-2.23952	0.005	0.158	1.06814815359565e-10	b2	ADGRG5
4.63468536308775e-15	-0.424216	0.044	0.241	1.09128301559264e-10	b2	SUPT4H1
4.77891065901445e-15	-2.14157	0.013	0.174	1.12524230377154e-10	b2	HIP1R
4.89025171646207e-15	-0.105176	0.052	0.257	1.15145866915816e-10	b2	TMF1
4.89164676023263e-15	-0.211887	0.042	0.236	1.15178714616438e-10	b2	RBM42
4.98644516517269e-15	-0.347876	0.924	0.948	1.17410837859156e-10	b2	RPL39
5.20674587593719e-15	-0.615456	0.042	0.235	1.22598038394817e-10	b2	SEPHS2
5.33450524165098e-15	-0.505292	0.044	0.239	1.25606260419914e-10	b2	EBLN3P
5.38291393809426e-15	0.151583	0.209	0.558	1.26746091586368e-10	b2	MTDH
5.52607992298126e-15	-0.111455	0.065	0.281	1.30117077866517e-10	b2	UBE2L3
5.59016302201922e-15	-0.148225	0.063	0.277	1.31625978516465e-10	b2	SF3B4
5.67440837340673e-15	0.238533	0.068	0.288	1.33609619560235e-10	b2	DARS
5.6813871177524e-15	-0.956896	0.039	0.227	1.33773941074598e-10	b2	MBNL2
5.71829938987243e-15	0.100059	0.285	0.714	1.34643077433936e-10	b2	HSP90AA1
5.75803590229949e-15	-0.126492	0.081	0.31	1.35578713355544e-10	b2	FUT8
6.13049331746082e-15	-0.349224	0.039	0.229	1.44348595652932e-10	b2	CUL3
6.14181400078919e-15	-1.54211	0.013	0.174	1.44615152462582e-10	b2	RIC3
6.28116216243961e-15	-0.395046	0.815	0.932	1.47896244276803e-10	b2	RPL35A
6.303065297916e-15	0.183219	0.097	0.342	1.4841197550473e-10	b2	FKBP1A
6.39147972474127e-15	-1.11706	0.029	0.206	1.50493781598758e-10	b2	NUAK2
6.50770527233609e-15	0.361272	0.217	0.59	1.53230428342426e-10	b2	COX6C
6.52814953142633e-15	-0.678015	0.023	0.197	1.53711808866964e-10	b2	MRPL18
6.71137817981398e-15	-0.437534	0.773	0.943	1.580261106219e-10	b2	PTMA
6.90212822362566e-15	-0.195122	0.037	0.224	1.6251751115349e-10	b2	MTERF4
6.92534787739675e-15	-0.531713	0.031	0.212	1.63064241121184e-10	b2	NSFL1C
6.9568889700048e-15	-0.463291	0.034	0.218	1.63806907687733e-10	b2	HADHB
6.96845677444748e-15	0.176645	0.149	0.447	1.6407928321114e-10	b2	IER2
6.98997970854538e-15	-0.138949	0.052	0.254	1.64586062217409e-10	b2	WDR33
7.1554808024439e-15	-0.821661	0.031	0.212	1.68482950974344e-10	b2	ARL14EP
7.19551547449957e-15	0.236555	0.112	0.371	1.69425607362567e-10	b2	UFC1
7.36447819247392e-15	-0.5008	0.037	0.223	1.73404003519991e-10	b2	ATG12
7.43656079122597e-15	0.19909	0.125	0.398	1.75101260390207e-10	b2	FAM107B
7.44266930034956e-15	-0.390156	0.068	0.284	1.75245091346031e-10	b2	CEP350
7.50076551344579e-15	0.548887	0.18	0.512	1.76613024779594e-10	b2	CSDE1
7.77174024245434e-15	-0.403834	0.039	0.227	1.8299339574883e-10	b2	ADIPOR1
7.84584909513578e-15	-0.374467	0.901	0.959	1.84738362794067e-10	b2	RPS18
8.61220354780309e-15	0.222594	0.23	0.604	2.02782944736572e-10	b2	SLC25A3
8.72989086196641e-15	-0.474839	0.47	0.909	2.05554010235861e-10	b2	CYBA
8.94706494467757e-15	0.109805	0.047	0.244	2.10667591187378e-10	b2	AC079781.5
9.01983212687924e-15	-2.83058	0.008	0.16	2.12380967259498e-10	b2	AC008691.1
9.12218612954584e-15	0.230697	0.086	0.32	2.14790994606286e-10	b2	ALKBH7
9.15248623281533e-15	0.228911	0.065	0.281	2.1550444083787e-10	b2	TXNL4A
9.52948284427474e-15	-1.00697	0.026	0.2	2.24381203051293e-10	b2	UBA3
9.76194633793621e-15	-0.246604	0.042	0.232	2.29854788473046e-10	b2	MARF1
9.81261269068155e-15	-1.3906	0.016	0.178	2.31047778414788e-10	b2	TGIF1
9.81901089083882e-15	0.183731	0.081	0.31	2.31198430435691e-10	b2	PRDX6
9.9831796300221e-15	0.13507	0.094	0.334	2.350639475685e-10	b2	NIPBL
1.00307502794537e-14	-0.334576	0.05	0.248	2.36184046080017e-10	b2	DHPS
1.01163400453036e-14	-0.341659	0.037	0.222	2.38199342706719e-10	b2	MTMR14
1.04290909027912e-14	0.333993	0.078	0.306	2.45563374397122e-10	b2	TWF2
1.04766000805983e-14	-0.416714	0.037	0.222	2.46682025497767e-10	b2	NCOA7
1.0496005635521e-14	0.242233	0.198	0.544	2.47138948693978e-10	b2	KRTCAP2
1.05134649995212e-14	0.409873	0.18	0.505	2.47550046878725e-10	b2	ATP5F1A
1.08627948833236e-14	-0.246687	0.042	0.232	2.55775368322737e-10	b2	CELF1
1.09594164216949e-14	0.299437	0.154	0.451	2.58050419065227e-10	b2	SEPTIN1
1.098734820405e-14	-0.300616	0.042	0.232	2.58708100812561e-10	b2	UBR2
1.11222677961334e-14	0.29078	0.078	0.306	2.61884917527757e-10	b2	SF3B5
1.13315918446158e-14	-5.03398	0.018	0.18	2.66813661573324e-10	b2	IGLC3
1.14759180211586e-14	0.122385	0.089	0.323	2.702119657262e-10	b2	SUMO1
1.16304646595934e-14	-1.1544	0.021	0.188	2.73850920874786e-10	b2	ZNF107
1.178909755329e-14	-0.148221	0.042	0.232	2.77586090989767e-10	b2	ZBTB7A
1.18321956301199e-14	-0.580555	0.034	0.216	2.78600878306804e-10	b2	DNM2
1.2016622479808e-14	0.175725	0.104	0.355	2.8294339290956e-10	b2	TAF15
1.21444761499466e-14	0.233487	0.097	0.34	2.85953835426643e-10	b2	OSBPL8
1.2210861956187e-14	-1.10919	0.037	0.219	2.87516955620379e-10	b2	IST1
1.22555961622677e-14	0.325852	0.123	0.389	2.88570267236755e-10	b2	NDUFB9
1.29809885231613e-14	-0.180357	0.039	0.225	3.05650355766355e-10	b2	RBM26
1.32066685542042e-14	-3.35509	0.005	0.153	3.10964217777293e-10	b2	PLXNC1
1.33012650588873e-14	-0.803804	0.026	0.199	3.13191587076561e-10	b2	PLEKHA2
1.33172068383083e-14	0.336547	0.125	0.392	3.13566952214808e-10	b2	RHOG
1.33186587284227e-14	-0.101892	0.06	0.267	3.1360113841944e-10	b2	CEBPZ
1.39281851396916e-14	-0.299135	0.057	0.261	3.27953047299178e-10	b2	RPA2
1.40709300532369e-14	0.156128	0.104	0.352	3.31314119033515e-10	b2	CHURC1
1.41368534299585e-14	-0.184194	0.057	0.262	3.32866350861804e-10	b2	AP3B1
1.42393923210046e-14	-0.238852	0.055	0.257	3.35280731590375e-10	b2	PFDN2
1.44870289662302e-14	0.179371	0.256	0.659	3.41111584038857e-10	b2	JAK1
1.45226908194046e-14	0.237216	0.07	0.289	3.41951278033701e-10	b2	PRPF6
1.46264929925453e-14	-0.469985	0.047	0.241	3.44395404002471e-10	b2	MANBA
1.47099667176733e-14	-0.292073	0.055	0.256	3.46360876334336e-10	b2	FAAP20
1.4710060769135e-14	-0.634972	0.034	0.214	3.46363090870053e-10	b2	NDUFB6
1.4765418414572e-14	0.103806	0.065	0.277	3.47666541989513e-10	b2	C1orf43
1.48250214592382e-14	-1.03315	0.026	0.198	3.49069955279223e-10	b2	CEP170
1.5190157020806e-14	-0.172268	0.05	0.246	3.57667437211899e-10	b2	CYC1
1.52446723189782e-14	-0.145906	0.065	0.276	3.58951054422662e-10	b2	PRKAR1A
1.55973359227824e-14	0.159347	0.091	0.328	3.67254871637834e-10	b2	PNN
1.56238860868222e-14	-0.284451	0.042	0.23	3.67880021800315e-10	b2	EPN1
1.58515337183049e-14	0.125477	0.081	0.307	3.73240212931206e-10	b2	RNH1
1.59895050902929e-14	-0.39902	0.034	0.214	3.76488886856037e-10	b2	MFSD10
1.63654462577201e-14	-0.109711	0.057	0.262	3.85340797584279e-10	b2	LUC7L2
1.64624148555446e-14	-0.57734	0.034	0.213	3.87624020188654e-10	b2	MKLN1
1.69939890985627e-14	0.371326	0.12	0.385	4.00140467314758e-10	b2	PSMB3
1.72305454358071e-14	-0.120424	0.034	0.214	4.05710422831515e-10	b2	TOR3A
1.76010573897339e-14	0.24542	0.078	0.303	4.14434497298675e-10	b2	CCDC12
1.76867118867042e-14	-0.625567	0.031	0.207	4.16451318084337e-10	b2	UNC93B1
1.77000278734263e-14	4.56954	0.107	0.013	4.16764856307696e-10	b2	TRBV20-1
1.7710267316207e-14	-0.595297	0.029	0.203	4.17005954227409e-10	b2	OAS1
1.80174133488658e-14	-0.277085	0.042	0.229	4.24238014712394e-10	b2	NT5DC1
1.81040825434758e-14	-0.502348	0.026	0.198	4.26278727568681e-10	b2	KXD1
1.85486482415076e-14	0.158229	0.188	0.513	4.36746471494538e-10	b2	ACTR2
1.85589475206363e-14	0.144353	0.086	0.316	4.36988978320901e-10	b2	ILF3
1.89771189113532e-14	0.214616	0.076	0.296	4.46835241886722e-10	b2	AKR1A1
1.90163666071685e-14	-1.8119	0.013	0.168	4.47759368132388e-10	b2	HCK
1.90253317251301e-14	-1.20191	0.029	0.201	4.47970460799914e-10	b2	KLF13
1.93621440892116e-14	-0.25262	0.047	0.238	4.55901044724576e-10	b2	NDUFA5
1.96732850513415e-14	-0.946172	0.021	0.186	4.63227169818887e-10	b2	IARS
1.98895552251015e-14	-0.305572	0.057	0.259	4.68319467330239e-10	b2	SRM
1.9989307130839e-14	0.161322	0.081	0.307	4.70668225702734e-10	b2	BIRC6
1.99931503256159e-14	-0.288569	0.055	0.254	4.70758717566953e-10	b2	MPG
2.0309523101849e-14	-0.645439	0.026	0.197	4.78208030956138e-10	b2	PSENEN
2.03963366507178e-14	-0.439759	0.037	0.218	4.80252142777801e-10	b2	CPSF6
2.06166358772386e-14	0.113173	0.073	0.291	4.85439308365461e-10	b2	MAP4K1
2.07391761371816e-14	-0.296536	0.05	0.244	4.88324641326079e-10	b2	DENR
2.14482133615267e-14	-0.236134	0.044	0.235	5.05019631810507e-10	b2	TRANK1
2.14944219486379e-14	0.233863	0.149	0.437	5.06107659202629e-10	b2	CDC42SE2
2.25005972814011e-14	0.142168	0.089	0.321	5.29799063587871e-10	b2	BUB3
2.29588108347501e-14	0.126714	0.219	0.566	5.40588159915027e-10	b2	SPCS1
2.30835644922572e-14	-0.352032	0.039	0.223	5.43525609534688e-10	b2	NT5C3A
2.31294246363178e-14	0.279425	0.089	0.321	5.44605432486738e-10	b2	VAPA
2.3363713519337e-14	-2.60079	0.008	0.156	5.50121998526308e-10	b2	IL7
2.35402190138698e-14	-0.41237	0.037	0.218	5.54277996900577e-10	b2	CALHM6
2.39451996706212e-14	-0.430739	0.047	0.238	5.63813671444446e-10	b2	DLEU2
2.42333643964815e-14	-0.299811	0.052	0.248	5.70598798079552e-10	b2	MTCH1
2.44053421905954e-14	-0.200933	0.07	0.284	5.7464818721976e-10	b2	BAZ1A
2.46262820302918e-14	4.115	0.115	0.017	5.7985043668525e-10	b2	HIST1H1B
2.47970045688902e-14	0.273299	0.175	0.487	5.83870269579089e-10	b2	DDX24
2.49587854430875e-14	-0.867274	0.029	0.201	5.87679562042938e-10	b2	ANXA4
2.51054726865123e-14	0.363328	0.112	0.367	5.91133459876618e-10	b2	CDKN1B
2.60955736596165e-14	-0.332165	0.843	0.94	6.1444637738933e-10	b2	RPL29
2.67237051938003e-14	-1.20754	0.023	0.19	6.29236362493222e-10	b2	NLRC5
2.75519768640158e-14	-0.71376	0.034	0.211	6.48738847240116e-10	b2	MSMO1
2.79523613169498e-14	0.243095	0.248	0.654	6.581662995689e-10	b2	EIF4B
2.83978353075194e-14	0.102616	0.279	0.704	6.68655430150851e-10	b2	YWHAB
2.84133442632894e-14	-0.220298	0.055	0.254	6.69020604023412e-10	b2	HNRNPH1
2.85734196060286e-14	0.266134	0.091	0.325	6.72789738043548e-10	b2	TLK1
2.95259876790709e-14	-1.39691	0.029	0.199	6.95218905891404e-10	b2	DAAM1
3.0249621254363e-14	-3.32767	0.003	0.143	7.12257582055232e-10	b2	SOWAHD
3.04596146269362e-14	-0.147199	0.06	0.262	7.17202086005841e-10	b2	NGLY1
3.08463472804371e-14	-0.642384	0.026	0.195	7.26308093065172e-10	b2	NUMB
3.08876072725567e-14	-0.254298	0.042	0.227	7.2727960083962e-10	b2	PPP3R1
3.10804483429685e-14	-0.465063	0.037	0.216	7.31820236683536e-10	b2	GLO1
3.15420564813192e-14	-0.270517	0.05	0.242	7.42689261909141e-10	b2	INO80D
3.1741958749689e-14	0.14427	0.089	0.321	7.47396160720178e-10	b2	CBX3
3.18111822235296e-14	3.6334	0.115	0.017	7.49026096635227e-10	b2	GZMA
3.2310816494006e-14	-0.203565	0.037	0.217	7.60790485167865e-10	b2	GTF2B
3.33783268009572e-14	0.279654	0.11	0.361	7.85926082855339e-10	b2	COX7B
3.38416294260779e-14	0.277238	0.094	0.329	7.9683500646643e-10	b2	CNOT7
3.45728327995205e-14	-0.234675	0.05	0.242	8.1405192109751e-10	b2	CREB1
3.46066990523261e-14	-0.606575	0.039	0.219	8.1484933588607e-10	b2	TYMP
3.51599550789372e-14	-1.04407	0.021	0.184	8.27876302288656e-10	b2	SNX22
3.54161427161781e-14	-0.290637	0.039	0.222	8.3390849639513e-10	b2	COA1
3.54661118238765e-14	-0.456419	0.034	0.21	8.35085069004996e-10	b2	RPAIN
3.54955674466279e-14	-0.184414	0.07	0.283	8.357786310983e-10	b2	ZEB2
3.57419816251807e-14	-0.946057	0.023	0.188	8.41580699346505e-10	b2	NUTM2B-AS1
3.69517736314914e-14	0.301642	0.063	0.268	8.70066461927096e-10	b2	IFI27L2
3.69562070823438e-14	-0.407072	0.394	0.803	8.70170851960866e-10	b2	LAPTM5
3.71451331049107e-14	0.157822	0.073	0.289	8.74619304088227e-10	b2	HSPA9
3.7283860447794e-14	-0.489139	0.034	0.21	8.77885778103757e-10	b2	BLOC1S4
3.74734054237735e-14	-0.492026	0.037	0.216	8.8234880410817e-10	b2	CCDC32
3.77723842650024e-14	-0.217184	0.052	0.246	8.89388559903747e-10	b2	PLEKHJ1
3.80419681757515e-14	-0.157731	0.039	0.222	8.95736182666244e-10	b2	MRPS26
3.94087305215277e-14	-0.413363	0.044	0.23	9.27917968859891e-10	b2	UBE2K
3.95502209526012e-14	0.236355	0.117	0.374	9.31249502549948e-10	b2	EID1
3.98669610305163e-14	0.327462	0.099	0.338	9.38707464424537e-10	b2	ATP5F1C
4.03533942783587e-14	-2.04766	0.016	0.171	9.50161021678234e-10	b2	RASGRP3
4.05201746374957e-14	-1.10711	0.018	0.177	9.54088032014473e-10	b2	LPAR5
4.06494058185831e-14	0.143888	0.073	0.289	9.57130909404359e-10	b2	SIVA1
4.09749493476655e-14	-1.9588	0.01	0.16	9.64796157340133e-10	b2	NEK6
4.11025563585942e-14	2.72716	0.399	0.267	9.67800792019459e-10	b2	AL138963.4
4.14796625823075e-14	0.159145	0.073	0.289	9.76680135163012e-10	b2	KIAA0040
4.16249723887217e-14	-0.4872	0.039	0.22	9.80101599864841e-10	b2	ILK
4.17796259274286e-14	1.60918	0.172	0.045	9.83743072087233e-10	b2	IGKV1-39
4.19924593982637e-14	-0.826153	0.023	0.188	9.88754448991516e-10	b2	STOML2
4.23218437512298e-14	0.229298	0.107	0.351	9.96510132966456e-10	b2	RAB7A
4.29377759043096e-14	-0.782936	0.031	0.204	1.01101287144287e-09	b2	REV3L
4.38455945998507e-14	0.116925	0.042	0.225	1.03238837044808e-09	b2	YTHDF2
4.50465561656554e-14	-0.11313	0.05	0.241	1.06066621147652e-09	b2	MRPS36
4.54581654725291e-14	0.180305	0.06	0.262	1.07035796421617e-09	b2	RAB5IF
4.57648547922458e-14	0.161682	0.24	0.614	1.07757927093822e-09	b2	ZFP36
4.57821863357301e-14	0.283854	0.12	0.379	1.0779873594611e-09	b2	CMPK1
4.66551310279611e-14	-0.870107	0.037	0.213	1.09854171518437e-09	b2	ALCAM
4.83260556663909e-14	0.187757	0.287	0.706	1.13788530672084e-09	b2	SON
5.00067540116974e-14	0.343153	0.065	0.273	1.17745902995943e-09	b2	MRPL54
5.0863440874382e-14	4.32588	0.086	0.006	1.1976305788282e-09	b2	PRKCQ
5.16427907552392e-14	-0.638863	0.031	0.204	1.21598115112286e-09	b2	ARID4A
5.19563596928052e-14	-0.323694	0.07	0.28	1.22336444532679e-09	b2	KDM5A
5.27559971243234e-14	3.40576	0.149	0.034	1.24219270828932e-09	b2	IGHV4-28
5.56400762250804e-14	-2.05336	0.008	0.153	1.31010123479574e-09	b2	PRKRIP1
5.88023884117346e-14	0.477653	0.112	0.364	1.3845610375427e-09	b2	NDUFC1
5.930670990193e-14	-0.436266	0.037	0.213	1.39643579135084e-09	b2	YIPF3
5.95362949566707e-14	-0.116179	0.05	0.239	1.40184160104977e-09	b2	PQBP1
5.97532094369649e-14	0.494929	0.102	0.344	1.40694906940278e-09	b2	TRA2B
6.07706200945123e-14	0.314669	0.05	0.241	1.43090502074539e-09	b2	COPZ1
6.20540084690783e-14	4.49037	0.112	0.017	1.46112368341292e-09	b2	KLRB1
6.36192338196351e-14	-7.22672	0	0.134	1.49797847951713e-09	b2	LINC01588
6.41972680001432e-14	-2.01209	0.018	0.174	1.51158887233137e-09	b2	PLPP5
6.51752867517148e-14	0.104866	0.065	0.27	1.53461730185588e-09	b2	UBE2L6
6.51794691019577e-14	-1.02743	0.031	0.201	1.5347157794747e-09	b2	HOOK3
6.77417691907866e-14	-0.69619	0.018	0.175	1.59504769736626e-09	b2	DENND3
6.81383739120184e-14	-0.537928	0.029	0.197	1.60438615213239e-09	b2	LILRB1
7.05977079132437e-14	0.327688	0.089	0.315	1.66229363052524e-09	b2	FIS1
7.07424632644947e-14	0.576553	0.159	0.454	1.66570204002579e-09	b2	WIPF1
7.14982765366863e-14	-1.33071	0.013	0.164	1.68349841933282e-09	b2	ARRDC1
7.22464602500884e-14	-0.124798	0.081	0.3	1.70111515304858e-09	b2	ZBTB38
7.45981020621987e-14	-0.545467	0.023	0.186	1.75648691115653e-09	b2	MRPL40
7.7418711848121e-14	-0.354434	0.037	0.212	1.82290098917586e-09	b2	TMEM259
8.32854774190664e-14	0.133655	0.084	0.305	1.96103985130934e-09	b2	TOP1
8.67268282264031e-14	-1.47527	0.016	0.168	2.04206989741889e-09	b2	TMEM60
8.71554598808394e-14	-0.360118	0.768	0.936	2.05216245835424e-09	b2	RPL21
8.95361672364774e-14	-0.203922	0.063	0.263	2.1082185937501e-09	b2	MAP4K4
8.95895708987878e-14	0.217838	0.086	0.308	2.10947603638286e-09	b2	PHF3
9.21147617729753e-14	-0.794527	0.023	0.185	2.16893418070648e-09	b2	RGS14
9.23591526826918e-14	0.325579	0.238	0.611	2.17468860906666e-09	b2	CNN2
9.24163226641287e-14	-0.198527	0.037	0.212	2.17603473344957e-09	b2	NGRN
9.2675290394247e-14	-0.283124	0.055	0.248	2.18213238762294e-09	b2	DDX27
9.36908966969895e-14	0.21667	0.094	0.326	2.20604585362731e-09	b2	DUT
9.46783366954025e-14	-0.498193	0.05	0.236	2.22929611582995e-09	b2	SMYD3
9.57769770511666e-14	0.151457	0.076	0.289	2.25516470164677e-09	b2	TGFB1
9.58774638752183e-14	0.280677	0.091	0.318	2.25753076440589e-09	b2	IK
9.79905493227631e-14	0.113952	0.112	0.357	2.30728547435378e-09	b2	NSD3
9.85272468840537e-14	0.177091	0.07	0.278	2.31992255513193e-09	b2	CHST11
9.88821124265931e-14	0.156677	0.264	0.68	2.32827821919656e-09	b2	MYL12B
9.98903499636468e-14	-0.966319	0.021	0.179	2.35201818024403e-09	b2	TMEM18
1.05578861726462e-13	-0.281076	0.076	0.287	2.48595987821128e-09	b2	RASGEF1B
1.09490814246798e-13	-0.336214	0.055	0.246	2.57807071225509e-09	b2	OSBPL9
1.12256292184327e-13	0.362331	0.154	0.438	2.64318665577217e-09	b2	CELF2
1.22522934426137e-13	-0.763199	0.016	0.167	2.88492501399782e-09	b2	MAPK8IP3
1.24262639744396e-13	-0.363621	0.384	0.803	2.92588811542154e-09	b2	TOMM7
1.24550765373501e-13	-3.24468	0.005	0.143	2.93267232148446e-09	b2	PRKCE
1.25676834894729e-13	-0.520367	0.039	0.216	2.95918675443129e-09	b2	MAP3K8
1.26545645993234e-13	-2.4541	0.008	0.149	2.9796437805567e-09	b2	DOP1B
1.27665105780912e-13	-0.464762	0.037	0.21	3.00600258071736e-09	b2	PNPLA8
1.32862613446477e-13	-0.870454	0.021	0.178	3.12838309621075e-09	b2	DCLRE1C
1.36141856998141e-13	-0.359899	0.721	0.924	3.20559616487824e-09	b2	RACK1
1.3661560929075e-13	0.160018	0.052	0.241	3.21675113635999e-09	b2	PPP2CA
1.3684469831908e-13	-1.67794	0.013	0.16	3.22214526662106e-09	b2	BCL3
1.37818446055978e-13	0.35291	0.104	0.345	3.24507313083405e-09	b2	SMIM26
1.40549144564404e-13	-0.48697	0.021	0.178	3.30937015791346e-09	b2	YDJC
1.47660033166387e-13	-0.75067	0.023	0.182	3.47680314093576e-09	b2	NCBP2
1.4775072301952e-13	-0.228309	0.044	0.225	3.47893852421763e-09	b2	ERGIC1
1.49271082955488e-13	-0.203135	0.358	0.81	3.51473691926993e-09	b2	COX7C
1.56441752171605e-13	0.529618	0.107	0.348	3.68357749663262e-09	b2	HNRNPH3
1.5833903373357e-13	-0.393406	0.687	0.918	3.72825088829063e-09	b2	RPL37A
1.58614257621603e-13	0.174789	0.06	0.256	3.73473130995826e-09	b2	ZNHIT1
1.62054954163326e-13	-0.78341	0.023	0.182	3.81574595072966e-09	b2	ARFGAP2
1.62415663136071e-13	0.213523	0.068	0.27	3.82423920420193e-09	b2	SNRPA
1.64118089417127e-13	0.163692	0.089	0.31	3.86432453341567e-09	b2	MICOS13
1.76232929531606e-13	0.213724	0.091	0.316	4.1495805587512e-09	b2	PSMB8-AS1
1.79955938302957e-13	-0.484537	0.044	0.224	4.23724252328142e-09	b2	SEC63
1.81843885463325e-13	-0.384707	0.055	0.243	4.28169612711945e-09	b2	PARP14
1.84259465287371e-13	-0.358188	0.042	0.218	4.33857336965645e-09	b2	SDR39U1
1.87406616108347e-13	-0.174379	0.034	0.204	4.41267618288715e-09	b2	ZNRD1
1.93172514805606e-13	0.382228	0.12	0.37	4.54844003361279e-09	b2	PA2G4
2.01553132143774e-13	-0.513175	0.031	0.198	4.74577004945731e-09	b2	DNPH1
2.01751260767953e-13	-0.524136	0.444	0.822	4.75043518604221e-09	b2	TXNIP
2.04582406244205e-13	-1.20519	0.016	0.165	4.81709733742606e-09	b2	CALHM2
2.05561505085672e-13	0.166134	0.117	0.365	4.84015119874724e-09	b2	SNX6
2.07199533658843e-13	-0.246849	0.042	0.218	4.87872021953112e-09	b2	BABAM1
2.07381249482115e-13	3.95653	0.102	0.013	4.88299890030589e-09	b2	THEMIS
2.1251177157942e-13	0.329057	0.097	0.323	5.00380217360902e-09	b2	WTAP
2.16621286012621e-13	-0.534318	0.031	0.197	5.10056480045318e-09	b2	ELOF1
2.17505670988046e-13	-0.179017	0.057	0.248	5.12138852908453e-09	b2	AP3S1
2.20036407011086e-13	-0.504921	0.039	0.212	5.18097723948304e-09	b2	NAAA
2.20761897130681e-13	-1.08217	0.013	0.159	5.19805962983902e-09	b2	TLR9
2.21590430577273e-13	-0.343935	0.914	0.949	5.21756827837247e-09	b2	RPL18A
2.22472784725014e-13	-0.468016	0.034	0.203	5.23834418913518e-09	b2	SMC3
2.2340686238541e-13	-0.283879	0.039	0.213	5.26033798172685e-09	b2	FBXW5
2.38231938116342e-13	0.371075	0.154	0.437	5.60940921488739e-09	b2	KTN1
2.41336753102225e-13	-1.17116	0.018	0.169	5.68251518854498e-09	b2	SLC50A1
2.41382523375491e-13	0.186288	0.06	0.255	5.68359289539931e-09	b2	ADH5
2.46337273408599e-13	-0.29576	0.037	0.207	5.80025743967887e-09	b2	VKORC1
2.46683437457692e-13	-0.352602	0.812	0.936	5.80840821837881e-09	b2	RPS25
2.52008615654489e-13	-1.2848	0.018	0.169	5.93379486420059e-09	b2	CDCA7L
2.54601233498787e-13	-0.230766	0.037	0.207	5.99484064396243e-09	b2	AP1G2
2.59861196971235e-13	-0.459391	0.044	0.222	6.1186917438847e-09	b2	POLE4
2.63524337344621e-13	0.153955	0.063	0.259	6.20494404711644e-09	b2	RTF2
2.64360425873883e-13	0.474794	0.151	0.434	6.22463058762646e-09	b2	GTF3A
2.7370482951015e-13	0.144768	0.097	0.323	6.44465391564599e-09	b2	DDX46
2.77054233861317e-13	-0.247157	0.047	0.226	6.52351899049856e-09	b2	PYCR2
2.82269082582633e-13	-0.371899	0.034	0.201	6.64630781849069e-09	b2	GPCPD1
2.83316629359727e-13	-0.501176	0.037	0.206	6.67097335490412e-09	b2	UHMK1
2.86336699423107e-13	0.115507	0.243	0.6	6.74208392461648e-09	b2	TAGLN2
2.89339336279896e-13	0.416043	0.084	0.3	6.81278401204644e-09	b2	PSMA5
2.89361457219452e-13	-0.176614	0.044	0.223	6.81330487168921e-09	b2	OSGEP
2.96378480203368e-13	0.22404	0.097	0.323	6.97852769486851e-09	b2	SYNRG
3.01207456130051e-13	0.427421	0.159	0.448	7.09223076203819e-09	b2	DBI
3.15384231622418e-13	-0.89049	0.026	0.185	7.42603711778144e-09	b2	NARF
3.21699212948284e-13	0.452629	0.104	0.339	7.57472966808029e-09	b2	POLR1D
3.23147662400692e-13	0.2063	0.141	0.409	7.60883485888669e-09	b2	LY6E
3.33367791173715e-13	-1.74491	0.01	0.15	7.8494780109763e-09	b2	RRAS2
3.3821161051803e-13	-1.61566	0.01	0.15	7.96353058125754e-09	b2	AMFR
3.42010328184152e-13	-1.14912	0.021	0.173	8.05297518742403e-09	b2	DCTPP1
3.44811007322877e-13	-4.89662	0.003	0.133	8.11891997842446e-09	b2	LARGE1
3.45799764452113e-13	-1.1226	0.016	0.162	8.14220125378944e-09	b2	ZCCHC10
3.50314119112345e-13	-0.178033	0.044	0.222	8.24849624861927e-09	b2	SAT2
3.56556749480334e-13	0.289342	0.102	0.333	8.39548522326395e-09	b2	OGA
3.73034856745754e-13	-0.700547	0.031	0.194	8.78347873693553e-09	b2	MTG1
3.79110909932636e-13	-0.308095	0.924	0.955	8.92654548527385e-09	b2	RPL34
3.79385095937419e-13	-0.557345	0.031	0.194	8.93300146894247e-09	b2	UBE2E3
3.79531516167819e-13	-1.68207	0.01	0.15	8.93644907968746e-09	b2	BACE2
3.83523153640841e-13	0.362396	0.11	0.345	9.03043617562725e-09	b2	SND1
3.84389887053227e-13	-1.78483	0.016	0.161	9.05084428055528e-09	b2	KHDRBS2
3.88419397482206e-13	0.135996	0.057	0.246	9.14572313311601e-09	b2	PLD4
3.95217053078125e-13	-0.177595	0.039	0.211	9.30578073177753e-09	b2	CWC15
3.99736508398934e-13	0.233186	0.063	0.257	9.4121958267613e-09	b2	MRPL34
4.05779334404912e-13	-0.225049	0.05	0.231	9.55448020789805e-09	b2	DHX36
4.09268808812722e-13	-0.650857	0.039	0.209	9.63664337230436e-09	b2	HPCAL1
4.09875188573483e-13	-0.87465	0.021	0.173	9.65092119015122e-09	b2	SCAF4
4.32479059270468e-13	-0.885521	0.018	0.167	1.01831519295824e-08	b2	TRMT10C
4.40032226692464e-13	0.216076	0.065	0.262	1.03609988097008e-08	b2	ETV6
4.61364356597828e-13	-1.29157	0.016	0.161	1.08632851404525e-08	b2	SNN
4.61682721281587e-13	-0.110151	0.044	0.22	1.08707813552963e-08	b2	METTL23
4.64238682679956e-13	-0.268453	0.047	0.224	1.09309640223822e-08	b2	SDHAF2
4.66169426590011e-13	-0.581374	0.021	0.172	1.09764253184884e-08	b2	PMS2
4.699559866135e-13	-1.09063	0.016	0.161	1.10655836608015e-08	b2	ZNF511
4.71123665367859e-13	-0.286818	0.029	0.188	1.10930778247516e-08	b2	WDR70
4.77754750974963e-13	-1.05879	0.021	0.172	1.12492133664565e-08	b2	TSSC4
4.90598250856972e-13	-0.37601	0.029	0.188	1.15516264146783e-08	b2	IRF5
5.05684464937367e-13	4.31293	0.099	0.013	1.19068464114152e-08	b2	C1QB
5.07085026734175e-13	-0.347911	0.039	0.209	1.19398240394829e-08	b2	MRPL16
5.07228346643409e-13	-0.770153	0.018	0.166	1.19431986500657e-08	b2	METTL21A
5.07821708170499e-13	-1.37887	0.01	0.149	1.19571699405826e-08	b2	RAD17
5.13691184982201e-13	-1.52162	0.008	0.143	1.20953726415909e-08	b2	SELENOO
5.22461032853825e-13	-1.59286	0.013	0.154	1.23018674795762e-08	b2	MPEG1
5.3959985965982e-13	-1.42871	0.021	0.171	1.27054182955501e-08	b2	LRCH3
5.40942163359102e-13	-0.932324	0.026	0.182	1.27370241784534e-08	b2	WDR74
5.42189340304639e-13	-0.364676	0.044	0.219	1.2766390206813e-08	b2	MRPS5
5.48495375730318e-13	-0.360036	0.031	0.193	1.29148721169461e-08	b2	TNRC6A
5.51560356513153e-13	-0.592372	0.026	0.182	1.29870401544587e-08	b2	CCDC115
5.69009593278206e-13	0.111338	0.073	0.275	1.33978998833286e-08	b2	GGNBP2
5.74524041104585e-13	0.111595	0.06	0.25	1.35277430718486e-08	b2	RAB31
5.8888473476929e-13	-1.11541	0.016	0.16	1.38658799648777e-08	b2	CEPT1
5.9632390676767e-13	0.410644	0.091	0.312	1.40410427087516e-08	b2	HMGN4
6.34475380311981e-13	0.100892	0.081	0.288	1.49393573048259e-08	b2	ATF6B
6.39760630953038e-13	-0.112007	0.063	0.255	1.50638038164202e-08	b2	YME1L1
6.44552644824452e-13	-0.341321	0.029	0.187	1.51766365750366e-08	b2	C5orf56
6.47670826833363e-13	-0.397614	0.037	0.203	1.52500572886184e-08	b2	SYNCRIP
6.47957734840929e-13	3.80057	0.154	0.041	1.52568128245645e-08	b2	CD247
6.60497949011015e-13	0.143599	0.065	0.259	1.55520847074133e-08	b2	PCMTD1
6.6706917138969e-13	-1.58646	0.01	0.148	1.57068107095416e-08	b2	HSD17B7
6.70861690468637e-13	-0.217016	0.06	0.246	1.57961093637745e-08	b2	ERLEC1
6.76273076636733e-13	-1.86134	0.008	0.142	1.59235258624885e-08	b2	C16orf74
6.9002558018174e-13	0.79062	0.828	0.891	1.62473423109593e-08	b2	MTRNR2L12
6.9959843815573e-13	0.103877	0.063	0.254	1.64727448248148e-08	b2	RANBP1
7.14427650826399e-13	0.141672	0.037	0.203	1.68219134663584e-08	b2	SPAG7
7.30825579855357e-13	-0.141015	0.055	0.238	1.72080191032742e-08	b2	TMEM230
7.34349037599486e-13	0.253792	0.057	0.244	1.72909824393175e-08	b2	STXBP2
7.38603182327544e-13	-0.131273	0.334	0.762	1.73911505310843e-08	b2	ARPC2
7.41439689048829e-13	-0.419053	0.026	0.181	1.74579389183437e-08	b2	MCTS1
7.42513069364525e-13	3.57479	0.107	0.017	1.74832127312571e-08	b2	GIMAP5
7.4791526508564e-13	-1.89608	0.016	0.159	1.76104128317065e-08	b2	PHACTR1
7.48921000049345e-13	0.216838	0.102	0.327	1.76340938671619e-08	b2	PAFAH1B1
7.64350563774324e-13	0.402816	0.232	0.589	1.79973983746302e-08	b2	UQCR11
7.648999706937e-13	0.326138	0.078	0.283	1.80103347099539e-08	b2	PSMC5
7.73921164261564e-13	-0.11797	0.052	0.233	1.82227477337028e-08	b2	BAZ1B
7.74090175445823e-13	-0.124826	0.039	0.207	1.82267272710474e-08	b2	ATXN2L
7.75123494393625e-13	-0.937424	0.021	0.169	1.82510577989923e-08	b2	UNC119
7.87975808790685e-13	-0.564093	0.037	0.201	1.85536783937855e-08	b2	TMEM87A
8.0317086372174e-13	-0.943465	0.016	0.159	1.89114611571921e-08	b2	IVD
8.19859006834757e-13	-0.169364	0.047	0.223	1.93044001749312e-08	b2	KANSL1
8.37409765570083e-13	-0.508672	0.029	0.186	1.97176503401132e-08	b2	MAP2K2
8.46938649539116e-13	-3.2961	0.005	0.135	1.9942017442048e-08	b2	HAGHL
8.48205670046141e-13	-0.607295	0.042	0.211	1.99718507069064e-08	b2	CTCF
8.57805216033553e-13	-0.220832	0.05	0.226	2.0197881616726e-08	b2	SERINC3
8.58328524780945e-13	0.720149	0.52	0.4	2.02102034444921e-08	b2	JCHAIN
8.63033372455783e-13	-0.131455	0.039	0.207	2.03209837878439e-08	b2	CHCHD7
8.73785158038921e-13	-1.46052	0.01	0.147	2.05741453311844e-08	b2	TMEM19
8.7385012752975e-13	0.199029	0.084	0.291	2.05756751028155e-08	b2	TMEM219
8.77776304076881e-13	-0.389961	0.029	0.185	2.06681208557942e-08	b2	CYB5B
8.8916660486295e-13	-5.0724	0.01	0.146	2.0936316878103e-08	b2	IGLC2
9.0043594098124e-13	0.174685	0.065	0.258	2.12016646663443e-08	b2	NKTR
9.05720299084873e-13	0.300696	0.076	0.277	2.13260901622524e-08	b2	GPI
9.25766102323593e-13	-0.152936	0.368	0.819	2.17980886453113e-08	b2	MYL6
9.35012766717625e-13	0.372727	0.258	0.642	2.20158106051332e-08	b2	HNRNPK
9.64331047307758e-13	-0.109796	0.042	0.212	2.27061388399085e-08	b2	TMEM9B
9.68654052996864e-13	-0.586005	0.044	0.216	2.28079283318642e-08	b2	ST8SIA4
9.8580495906793e-13	0.379436	0.084	0.293	2.32117635662135e-08	b2	PPM1G
9.96328747155772e-13	-1.04965	0.026	0.179	2.34595566805298e-08	b2	TLE3
1.00541987130001e-12	-0.677997	0.037	0.2	2.367361628963e-08	b2	EEA1
1.00565795181325e-12	-1.69452	0.016	0.158	2.36792221333948e-08	b2	FCHO1
1.00761160919233e-12	0.101176	0.047	0.222	2.37252229500426e-08	b2	DNAJB6
1.01262369038165e-12	0.343753	0.104	0.332	2.38432374137264e-08	b2	ABHD14B
1.02090690452179e-12	-0.227919	0.037	0.2	2.403827397387e-08	b2	BECN1
1.02560167765655e-12	-0.652191	0.023	0.174	2.41488171021012e-08	b2	FARSA
1.04231027739756e-12	-0.938012	0.042	0.21	2.45422377916029e-08	b2	JAZF1
1.04667305559141e-12	-0.302616	0.039	0.206	2.46449637669552e-08	b2	DERL1
1.05994187804307e-12	0.16105	0.073	0.271	2.49573914604022e-08	b2	STAG2
1.07065505619183e-12	0.257833	0.084	0.293	2.52096439530928e-08	b2	SIT1
1.07186010440048e-12	-1.29184	0.018	0.162	2.52380180182136e-08	b2	MAP4K5
1.09409818680114e-12	-0.226779	0.037	0.2	2.57616359064197e-08	b2	TTC19
1.09754033187061e-12	-1.23565	0.026	0.178	2.58426846542254e-08	b2	HIPK2
1.11280816161099e-12	0.329276	0.144	0.405	2.62021809732923e-08	b2	EWSR1
1.11844553462482e-12	-1.64628	0.01	0.146	2.6334918558276e-08	b2	GPATCH11
1.12935914135739e-12	0.281028	0.086	0.294	2.6591890342401e-08	b2	CLNS1A
1.14825917057669e-12	-0.676152	0.026	0.179	2.70369104303987e-08	b2	MICAL1
1.15642585489564e-12	-1.78859	0.008	0.14	2.72292031793727e-08	b2	MEF2C-AS1
1.16314954256196e-12	-0.743786	0.026	0.179	2.73875191291639e-08	b2	ZFC3H1
1.16580117657803e-12	0.115385	0.068	0.261	2.74499545037064e-08	b2	MAGOH
1.16671855234635e-12	-0.2736	0.047	0.22	2.74715550335472e-08	b2	POLR2G
1.18583886953744e-12	-0.835518	0.026	0.179	2.79217620221285e-08	b2	JUND
1.19132793979267e-12	-0.588229	0.021	0.168	2.80510076703582e-08	b2	LMO4
1.20705152351403e-12	-0.333505	0.047	0.22	2.84212351726613e-08	b2	PCGF5
1.24272510653968e-12	-0.577625	0.086	0.29	2.92612053585834e-08	b2	TXN
1.25125252541403e-12	0.482006	0.188	0.498	2.94619919633987e-08	b2	TRAF3IP3
1.25380246439489e-12	-1.69573	0.013	0.15	2.9522032826642e-08	b2	ORAI3
1.26213552116462e-12	0.302364	0.078	0.282	2.9718242981342e-08	b2	RNF7
1.27732118326703e-12	0.235471	0.094	0.31	3.00758045812055e-08	b2	P2RY8
1.29275976090532e-12	-0.197921	0.35	0.771	3.04393213302767e-08	b2	HSP90AB1
1.32339387377325e-12	0.253018	0.112	0.344	3.11606321518649e-08	b2	DDX6
1.35587801737236e-12	-1.43115	0.018	0.161	3.19255037970496e-08	b2	PSMD3
1.36200472781692e-12	-1.34299	0.018	0.161	3.20697633211772e-08	b2	IFI35
1.4159933161871e-12	-0.274834	0.023	0.173	3.33409786229414e-08	b2	SMS
1.42767644674611e-12	-0.448678	0.021	0.167	3.36160696150839e-08	b2	SNHG25
1.44995180424459e-12	-1.03427	0.021	0.167	3.4140565182743e-08	b2	EED
1.4643300011696e-12	-0.513832	0.039	0.204	3.44791142075395e-08	b2	SCFD1
1.46931512582387e-12	-0.964419	0.021	0.167	3.45964939526488e-08	b2	SIDT1
1.48012836442501e-12	-0.408207	0.042	0.209	3.48511024687514e-08	b2	UBR5
1.48119218533786e-12	0.227352	0.128	0.373	3.48761511959653e-08	b2	DOCK10
1.49283517375401e-12	0.244444	0.238	0.583	3.5150297001212e-08	b2	LCP1
1.49883670316287e-12	-0.841072	0.021	0.167	3.5291609012673e-08	b2	AP1M1
1.49894098877171e-12	0.323872	0.063	0.251	3.52940645216187e-08	b2	BDP1
1.51499487846333e-12	0.30313	0.089	0.3	3.56720694082976e-08	b2	TECR
1.52544344981929e-12	0.137413	0.065	0.256	3.59180914694449e-08	b2	SCP2
1.55231710635268e-12	-0.27447	0.055	0.233	3.65508585861802e-08	b2	MBD5
1.55598392257904e-12	-0.278706	0.047	0.219	3.66371974410461e-08	b2	MIA3
1.5663113577985e-12	0.11158	0.131	0.377	3.68803672307236e-08	b2	IRF1
1.58818090289072e-12	0.279316	0.104	0.331	3.73953075394649e-08	b2	UBE2V1
1.58946994611943e-12	0.172424	0.047	0.219	3.7425659351328e-08	b2	PSMD6
1.61321475061099e-12	-0.212735	0.031	0.188	3.79847545178864e-08	b2	PDLIM2
1.62167090192113e-12	-1.89285	0.013	0.149	3.8183863056635e-08	b2	TMED8
1.64775247055324e-12	-0.107623	0.044	0.214	3.87979796716465e-08	b2	DEGS1
1.66070564799148e-12	0.202934	0.238	0.582	3.91029751876073e-08	b2	HMGN2
1.66151487057749e-12	0.495812	0.112	0.346	3.91220291426176e-08	b2	VPS13C
1.66769486343452e-12	-0.76308	0.018	0.161	3.92675432544293e-08	b2	TTC7A
1.67875081947109e-12	0.192315	0.073	0.27	3.95278667952663e-08	b2	IRF2
1.69356640293876e-12	-0.594199	0.037	0.198	3.98767145235959e-08	b2	EMC6
1.70546705661593e-12	-0.322603	0.05	0.223	4.01569273150787e-08	b2	FAM174C
1.71952236443994e-12	0.164936	0.099	0.318	4.04878735931029e-08	b2	PRPF4B
1.74821622479946e-12	0.118731	0.057	0.238	4.1163499229128e-08	b2	UBE2A
1.75642166234487e-12	-0.950947	0.021	0.166	4.13567044615723e-08	b2	SLC39A3
1.75650365764359e-12	-0.388336	0.037	0.198	4.1358635122876e-08	b2	EMC7
1.75737802112706e-12	-0.324658	0.034	0.193	4.13792228854578e-08	b2	RNF13
1.77447975775953e-12	0.503247	0.073	0.27	4.17819003762059e-08	b2	SPIDR
1.80507836901101e-12	-3.96709	0.005	0.132	4.25023752767333e-08	b2	COL19A1
1.81128321949443e-12	-0.299239	0.042	0.209	4.26484746862159e-08	b2	CDV3
1.81486409089837e-12	-0.304284	0.042	0.209	4.2732789884293e-08	b2	BUD31
1.87285012693709e-12	-0.207473	0.055	0.233	4.40981290888607e-08	b2	FAF1
1.88343507899884e-12	-2.29232	0.01	0.143	4.43473623701067e-08	b2	PELI1
1.88441403606658e-12	-0.142912	0.047	0.218	4.43704128932236e-08	b2	IQSEC1
1.88965500510449e-12	0.220703	0.073	0.269	4.44938167501904e-08	b2	NDUFA7
1.89371042343247e-12	-0.466287	0.013	0.149	4.45893056301408e-08	b2	HMOX1
1.93998031932787e-12	0.333757	0.078	0.28	4.5678776598894e-08	b2	PHC3
1.9443862497563e-12	0.311199	0.078	0.278	4.5782518636762e-08	b2	SNRPC
1.96011484313898e-12	-0.142964	0.042	0.209	4.61528640965505e-08	b2	UBA1
1.97412705946427e-12	0.188865	0.3	0.731	4.64827957421456e-08	b2	EIF3K
1.98696276041073e-12	0.140756	0.078	0.278	4.6785025156631e-08	b2	PRMT2
1.99751612676065e-12	-0.766717	0.026	0.177	4.70335147207062e-08	b2	DIP2B
2.0006934200668e-12	-0.782415	0.021	0.166	4.71083272688929e-08	b2	SMIM29
2.00267635637585e-12	-0.166128	0.039	0.203	4.71550174872258e-08	b2	SBDS
2.00540710435464e-12	-0.757036	0.023	0.171	4.72193156791344e-08	b2	RANGRF
2.01851911362099e-12	-0.758715	0.023	0.171	4.75280510493199e-08	b2	NMI
2.02682955645811e-12	-0.206523	0.039	0.203	4.77237287363626e-08	b2	CHMP2A
2.04360118463266e-12	-1.24182	0.016	0.154	4.81186334933607e-08	b2	GUCD1
2.05533721084217e-12	0.291397	0.076	0.274	4.83949699664897e-08	b2	NDUFS6
2.08452148913765e-12	-0.489487	0.034	0.192	4.9082142983235e-08	b2	SOCS1
2.1205973609338e-12	-0.273385	0.026	0.177	4.99315854605472e-08	b2	TBCC
2.13389024715656e-12	-0.119793	0.345	0.775	5.02445797595484e-08	b2	COMMD6
2.22630678253412e-12	-0.497248	0.037	0.197	5.24206195015485e-08	b2	TRAF3
2.24766067021782e-12	0.103186	0.248	0.598	5.29234181409489e-08	b2	ARHGAP15
2.25717435292591e-12	0.384736	0.125	0.367	5.31474273139936e-08	b2	CYFIP2
2.36848472430155e-12	0.203697	0.104	0.326	5.57683413184044e-08	b2	U2SURP
2.44667005804764e-12	0.168519	0.055	0.233	5.76092931867898e-08	b2	NAXE
2.45622453805567e-12	-3.42951	0.003	0.124	5.78342629730589e-08	b2	FCER2
2.46249303176955e-12	-2.56782	0.003	0.124	5.79818609260459e-08	b2	PAOX
2.47086342077281e-12	0.662723	0.157	0.432	5.81789501055167e-08	b2	WAS
2.54579532624219e-12	-0.34678	0.031	0.186	5.99432967516987e-08	b2	PSMB7
2.62761237168909e-12	0.599142	0.076	0.273	6.18697609037913e-08	b2	CAT
2.64636621032966e-12	-0.262982	0.047	0.217	6.23113387884221e-08	b2	TNKS2
2.6531627404115e-12	-0.905854	0.023	0.169	6.24713698857292e-08	b2	LHPP
2.71593776183372e-12	-0.114798	0.146	0.398	6.39494705401369e-08	b2	FOXP1
2.77347116887049e-12	-0.674692	0.031	0.185	6.53041521422245e-08	b2	EPSTI1
2.77674190702136e-12	-0.167078	0.057	0.237	6.5381164942725e-08	b2	ITCH
2.84796411455031e-12	0.193725	0.063	0.246	6.70581630412015e-08	b2	EFR3A
2.86075137374731e-12	0.389018	0.065	0.252	6.73592518462541e-08	b2	ERP44
2.8643318611313e-12	0.317808	0.099	0.316	6.74435580021975e-08	b2	ARHGAP30
2.88761975114373e-12	-0.682594	0.018	0.159	6.79918946604301e-08	b2	ESF1
2.91308832447912e-12	0.167403	0.07	0.261	6.85915776881853e-08	b2	SRP72
2.94218378712577e-12	0.177975	0.07	0.262	6.92766594516635e-08	b2	GLG1
3.01135346006812e-12	0.308159	0.164	0.44	7.09053285707639e-08	b2	PDIA3
3.04651896517061e-12	-0.117754	0.063	0.245	7.17333355539072e-08	b2	SEC31A
3.05974379876807e-12	-0.882368	0.016	0.153	7.20447274857931e-08	b2	KCNN4
3.10804397120111e-12	-0.684824	0.029	0.18	7.31820033459014e-08	b2	EPB41L4A-AS1
3.12871694705439e-12	0.37441	0.128	0.37	7.36687692353427e-08	b2	EPB41
3.14737333538501e-12	-0.407692	0.029	0.18	7.41080525549755e-08	b2	ARL2
3.16760901699458e-12	-0.266953	0.044	0.211	7.45845219141544e-08	b2	ELAVL1
3.21287441274147e-12	-0.595749	0.034	0.19	7.56503409224106e-08	b2	SURF1
3.23039037730805e-12	-0.321129	0.849	0.95	7.60627718240954e-08	b2	RPS15
3.23175949302461e-12	-0.6915	0.026	0.174	7.60950090227574e-08	b2	GCA
3.23314377164846e-12	-1.54871	0.013	0.147	7.61276032472345e-08	b2	ZBTB32
3.36875730283464e-12	-0.452447	0.029	0.179	7.93207594525445e-08	b2	TAF10
3.37582893030257e-12	-0.65775	0.021	0.164	7.94872679929042e-08	b2	PHF5A
3.37605261523667e-12	0.461634	0.081	0.282	7.94925348783627e-08	b2	PTPN2
3.37855042210953e-12	-2.19648	0.005	0.129	7.9551348238991e-08	b2	EHD3
3.40056014042123e-12	-0.466342	0.031	0.185	8.00695890663582e-08	b2	ADAM8
3.43292716911255e-12	0.518869	0.107	0.331	8.0831703123924e-08	b2	ARHGAP45
3.44585052361576e-12	-0.141145	0.063	0.245	8.11359964290566e-08	b2	SLBP
3.51945166159553e-12	-0.690195	0.039	0.199	8.28690088239284e-08	b2	GRSF1
3.5386106338466e-12	-0.227735	0.42	0.861	8.3320125984552e-08	b2	H3F3B
3.55631691083394e-12	-0.205585	0.026	0.174	8.3737037982496e-08	b2	HSD17B10
3.71817796960703e-12	-0.2446	0.037	0.194	8.75482184723672e-08	b2	CERT1
3.72962733894267e-12	-0.867433	0.018	0.158	8.78178053227442e-08	b2	COMMD2
3.87055998884137e-12	0.450197	0.198	0.509	9.11362054972589e-08	b2	APRT
3.9142921165748e-12	-0.368141	0.047	0.214	9.21659221768702e-08	b2	FAM172A
3.92894709749967e-12	0.309091	0.068	0.256	9.25109883577271e-08	b2	CAPZA2
3.96009244421709e-12	0.150085	0.065	0.25	9.32443366915356e-08	b2	IMPDH2
4.06398193507155e-12	-1.42503	0.018	0.156	9.56905186431946e-08	b2	STAP1
4.09883460081497e-12	-1.72544	0.013	0.146	9.65111595107893e-08	b2	NCR3
4.1046176766443e-12	0.293008	0.157	0.423	9.66473278142668e-08	b2	RSL1D1
4.10979074683346e-12	-4.53501	0.003	0.122	9.67691329249406e-08	b2	LINC02422
4.11715394181368e-12	-0.231731	0.042	0.205	9.6942506713945e-08	b2	IER3IP1
4.12818752230442e-12	0.330105	0.094	0.305	9.720230340018e-08	b2	EIF1AX
4.13074297663575e-12	-0.159879	0.047	0.213	9.72624741278654e-08	b2	NAGK
4.23730780440358e-12	-0.395901	0.044	0.209	9.97716495624868e-08	b2	ESD
4.28889569177871e-12	-0.182429	0.05	0.219	1.00986337958621e-07	b2	VPS13B
4.31824332217915e-12	-0.701673	0.026	0.173	1.0167735726403e-07	b2	RUBCN
4.32256505246134e-12	0.288575	0.065	0.25	1.01779116725255e-07	b2	RNPEPL1
4.33704981617899e-12	-0.129418	0.044	0.209	1.02120174971751e-07	b2	SSRP1
4.34970880104738e-12	-0.597236	0.042	0.203	1.02418243429462e-07	b2	CCAR1
4.39615644439793e-12	-0.172159	0.039	0.199	1.03511899639794e-07	b2	PSMC1
4.41084532114403e-12	-0.780302	0.021	0.162	1.03857763931657e-07	b2	SYS1
4.44689673091273e-12	0.321921	0.164	0.437	1.04706630426071e-07	b2	CD27
4.48311698076341e-12	0.238071	0.084	0.284	1.05559472429055e-07	b2	CORO1B
4.49244042052607e-12	-1.48759	0.008	0.134	1.05779002141707e-07	b2	SCRN1
4.50331700685025e-12	-1.29428	0.008	0.134	1.06035102243296e-07	b2	GANC
4.51112418781498e-12	-0.359431	0.031	0.184	1.06218930126291e-07	b2	EIF4G3
4.52513481933562e-12	0.381057	0.076	0.27	1.06548824456076e-07	b2	ATRAID
4.52899085460845e-12	0.593364	0.154	0.422	1.0663961866261e-07	b2	SF3B1
4.53162127717985e-12	0.523716	0.149	0.411	1.06701554592477e-07	b2	IQGAP1
4.65441913571103e-12	0.273172	0.068	0.255	1.09592952969452e-07	b2	DAXX
4.69288029396396e-12	0.165344	0.068	0.254	1.10498559401676e-07	b2	CFLAR
4.71766348124897e-12	0.45227	0.097	0.31	1.11082104329488e-07	b2	MEAF6
4.75109589378691e-12	-0.574508	0.018	0.156	1.11869303915106e-07	b2	MRPL55
4.7516072900347e-12	0.227329	0.07	0.258	1.11881345251157e-07	b2	MIEN1
4.7573072734957e-12	-0.924004	0.023	0.167	1.1201555706173e-07	b2	MRPL36
4.81002780929033e-12	0.533618	0.17	0.453	1.1325691479755e-07	b2	PDCD4
4.81502765084277e-12	-0.757936	0.018	0.156	1.13374641066744e-07	b2	ZDHHC6
4.85202251292676e-12	0.417031	0.154	0.419	1.14245722089373e-07	b2	SFPQ
4.89806442097772e-12	-1.18757	0.016	0.15	1.15329824856341e-07	b2	CLEC17A
4.90583042757269e-12	-0.107616	0.047	0.214	1.15512683247627e-07	b2	TMBIM1
4.93117625352622e-12	-0.689072	0.021	0.161	1.16109476065528e-07	b2	DTNBP1
5.02524589715759e-12	0.590462	0.102	0.319	1.18324439894473e-07	b2	SEPTIN2
5.04873753295894e-12	0.182454	0.055	0.23	1.18877573951051e-07	b2	PAGR1
5.06175189669617e-12	0.527413	0.102	0.319	1.19184010159608e-07	b2	PSMA6
5.12099849192686e-12	-0.718802	0.026	0.172	1.2057903049091e-07	b2	MAP2K3
5.13600671096655e-12	-0.121174	0.057	0.233	1.20932414016418e-07	b2	DNAJB14
5.2312425773853e-12	-1.20664	0.016	0.15	1.23174837727114e-07	b2	POLM
5.35417131357117e-12	-0.852805	0.026	0.172	1.26069317749347e-07	b2	NDE1
5.40015591183909e-12	0.315243	0.131	0.37	1.27152071100163e-07	b2	UQCRQ
5.42449663330896e-12	0.488011	0.094	0.305	1.27725197727893e-07	b2	DEF6
5.50773729773582e-12	0.346886	0.115	0.344	1.29685182412488e-07	b2	PPP1R12A
5.64535160852539e-12	-0.442166	0.026	0.172	1.32925448974339e-07	b2	TXNRD1
5.67129494160029e-12	0.207296	0.089	0.293	1.33536310694921e-07	b2	GRK6
5.67887244258611e-12	-1.45638	0.01	0.139	1.33714730533133e-07	b2	TAZ
5.81082933026471e-12	-0.332848	0.021	0.161	1.36821787410413e-07	b2	HSD17B12
5.91034331444873e-12	-0.292865	0.044	0.207	1.3916494368201e-07	b2	CIR1
5.92884086492847e-12	-0.230165	0.037	0.192	1.39600487005606e-07	b2	UFL1
5.95272959240297e-12	-1.11268	0.016	0.149	1.4016297098272e-07	b2	HTATIP2
5.96464010433402e-12	-0.398418	0.026	0.172	1.40443415896649e-07	b2	ADPGK
5.99653984827738e-12	-0.268571	0.044	0.207	1.41194527267539e-07	b2	POLR3K
6.03617501299365e-12	0.457511	0.104	0.323	1.42127776855949e-07	b2	AP2M1
6.04993965126639e-12	-0.486448	0.018	0.155	1.42451879028718e-07	b2	TNS3
6.0504196928818e-12	0.272468	0.065	0.248	1.42463182088595e-07	b2	RASSF5
6.0815495662856e-12	0.598822	0.112	0.336	1.43196166087761e-07	b2	DRAP1
6.13781444253515e-12	-0.481823	0.029	0.177	1.44520978863933e-07	b2	RNF41
6.1653311820733e-12	0.335107	0.068	0.254	1.45168888013098e-07	b2	PPP4R3B
6.20624128191651e-12	-0.593132	0.031	0.181	1.46132157224006e-07	b2	CUEDC2
6.61074774061656e-12	0.308738	0.076	0.269	1.55656666300557e-07	b2	BTN3A2
6.62912514905414e-12	-0.604526	0.023	0.166	1.56089380759629e-07	b2	TUSC2
6.68955379455421e-12	-6.99385	0	0.114	1.57512233646573e-07	b2	TSBP1-AS1
6.73191966077267e-12	0.129338	0.044	0.207	1.58509780332553e-07	b2	GLUD1
6.73817917734117e-12	0.328518	0.128	0.366	1.58657166909675e-07	b2	EIF3A
6.91505722145496e-12	0.240093	0.078	0.274	1.62821937336378e-07	b2	SNRPB2
6.94753373199016e-12	0.328109	0.128	0.363	1.6358662925344e-07	b2	RPN2
6.98201143023855e-12	0.313454	0.078	0.271	1.64398441136397e-07	b2	EPRS
7.02035922751696e-12	-0.445518	0.031	0.181	1.65301378371114e-07	b2	USP11
7.03674383415734e-12	-1.25998	0.013	0.143	1.65687170319069e-07	b2	IER5
7.04562185508903e-12	-1.13313	0.018	0.154	1.65896212199926e-07	b2	CHCHD1
7.05319180537171e-12	-2.04911	0.008	0.132	1.66074454249282e-07	b2	HMGA1P4
7.09669588798958e-12	0.465392	0.084	0.283	1.67098801378603e-07	b2	SNRPF
7.10440049444142e-12	0.315778	0.141	0.392	1.67280214042118e-07	b2	ATM
7.11137199339754e-12	-0.231009	0.042	0.201	1.67444364956539e-07	b2	FBXO11
7.2373174528835e-12	-0.727088	0.026	0.171	1.70409876745595e-07	b2	LARP7
7.42008717816497e-12	0.134051	0.052	0.223	1.74713372697072e-07	b2	CRYBG1
7.42308687460345e-12	-0.56953	0.026	0.171	1.74784003549413e-07	b2	CCDC90B
7.66776875033175e-12	0.318873	0.107	0.327	1.80545282995311e-07	b2	ATF7IP
7.78220119476666e-12	0.343838	0.073	0.262	1.83239709331976e-07	b2	DECR1
7.81304199902991e-12	0.374422	0.065	0.248	1.83965886909158e-07	b2	UFM1
8.0506225374425e-12	-0.388579	0.034	0.186	1.89559958266621e-07	b2	ZNF33A
8.26763492695741e-12	-0.660202	0.018	0.154	1.94669731990139e-07	b2	RABGEF1
8.34286879886116e-12	0.624401	0.125	0.36	1.96441188737985e-07	b2	RAD21
8.48454259225824e-12	-0.301542	0.034	0.186	1.99777039877313e-07	b2	TAF3
8.56269742852939e-12	-0.756236	0.023	0.165	2.01617273652153e-07	b2	CSMD1
8.63936187107607e-12	-0.173984	0.044	0.206	2.03422414616357e-07	b2	RICTOR
8.66135100463056e-12	0.542598	0.089	0.291	2.03940170755031e-07	b2	SCAND1
8.66788885962677e-12	0.474455	0.068	0.252	2.04094111088772e-07	b2	SNX5
8.85895386010831e-12	0.369661	0.07	0.257	2.0859292759011e-07	b2	STRAP
9.06931435019464e-12	-0.292494	0.037	0.191	2.13546075689683e-07	b2	RNF34
9.22422407584982e-12	-1.61659	0.013	0.142	2.1719358008996e-07	b2	ZNF274
9.40083437678508e-12	0.356798	0.12	0.351	2.21352046235781e-07	b2	TAGAP
9.69588411523758e-12	-0.448571	0.039	0.194	2.28299287377384e-07	b2	SPPL2A
9.7631464743561e-12	-0.164177	0.047	0.211	2.29883046885189e-07	b2	SAFB2
9.78634289787656e-12	0.4714	0.099	0.312	2.30429229873401e-07	b2	EIF1B
9.94525124657941e-12	-2.5014	0.005	0.124	2.34170885851959e-07	b2	FADS3
1.02494923123598e-11	-0.177871	0.042	0.2	2.41334545986824e-07	b2	IL27RA
1.0342089116123e-11	-0.310803	0.044	0.205	2.43514830328231e-07	b2	IAH1
1.03642373211432e-11	0.464538	0.099	0.31	2.44036331963637e-07	b2	POMP
1.05183003218804e-11	-0.881052	0.018	0.153	2.47663899378995e-07	b2	TMX2
1.05929374600057e-11	-0.115692	0.042	0.2	2.49421305433295e-07	b2	MDM4
1.07961557453092e-11	0.174515	0.039	0.195	2.5420628317905e-07	b2	RPL7L1
1.08416964920447e-11	-0.259126	0.031	0.179	2.55278585601685e-07	b2	SSBP4
1.10937609218495e-11	-0.213625	0.039	0.194	2.61213694665867e-07	b2	STX8
1.11040251952063e-11	0.260312	0.047	0.211	2.61455377246328e-07	b2	NUP210
1.12156159839985e-11	0.185581	0.068	0.249	2.64082893959228e-07	b2	PRKACB
1.12948718945083e-11	-0.197049	0.044	0.205	2.65949053628093e-07	b2	RPP21
1.15980062604972e-11	0.271719	0.076	0.265	2.73086655409667e-07	b2	SNRPN
1.16746928089957e-11	-1.01926	0.021	0.158	2.74892316880612e-07	b2	CDC16
1.16797385658495e-11	-0.670389	0.016	0.147	2.75011124271493e-07	b2	SMIM19
1.17255757838069e-11	-0.89788	0.021	0.158	2.76090407405517e-07	b2	UNC50
1.19251643984814e-11	0.355708	0.204	0.509	2.80789920926643e-07	b2	HNRNPA3
1.20587903462959e-11	-0.509917	0.031	0.178	2.83936277493884e-07	b2	CYB561D2
1.2131542021023e-11	-0.327553	0.052	0.219	2.85649288427007e-07	b2	FYTTD1
1.24003406202818e-11	-0.324721	0.039	0.193	2.91978420245154e-07	b2	DNTTIP2
1.24133642448077e-11	0.400512	0.206	0.504	2.92285074508241e-07	b2	SEC61B
1.24144866018597e-11	0.310412	0.076	0.264	2.92311501527389e-07	b2	ABLIM1
1.25399972423365e-11	-0.106306	0.261	0.59	2.95266775068055e-07	b2	MT-ATP8
1.25701054650835e-11	0.169117	0.05	0.214	2.95975703280856e-07	b2	NUTM2A-AS1
1.25715920819195e-11	-0.301498	0.026	0.168	2.96010707160876e-07	b2	DPM3
1.26868422812435e-11	-0.276834	0.305	0.645	2.9872438835416e-07	b2	KLF2
1.27623444744147e-11	-0.260964	0.021	0.158	3.00502162994568e-07	b2	MRPS25
1.28075377567461e-11	0.451819	0.091	0.295	3.01566284020343e-07	b2	UBA2
1.30673711759663e-11	-0.812952	0.029	0.173	3.07684321709304e-07	b2	VPS37B
1.31534148250009e-11	-1.83751	0.008	0.129	3.09710305469471e-07	b2	SNX15
1.3158316362826e-11	-0.168621	0.044	0.204	3.09825717079101e-07	b2	ZC3H13
1.3238636893481e-11	-1.01864	0.023	0.162	3.11716944293904e-07	b2	NEDD9
1.36591464339673e-11	0.237001	0.081	0.273	3.21618261934193e-07	b2	RERE
1.36770726489673e-11	0.248722	0.065	0.244	3.22040352592585e-07	b2	XRN2
1.37355065622988e-11	-0.312637	0.042	0.198	3.23416237515888e-07	b2	STIM2
1.3900196853201e-11	-0.130596	0.057	0.229	3.27294035105472e-07	b2	NAPA
1.40590942661609e-11	0.352038	0.117	0.34	3.31035433591025e-07	b2	VDAC2
1.4320251334935e-11	-2.16727	0.01	0.134	3.37184637932379e-07	b2	STAMBP
1.43850394134893e-11	0.441686	0.128	0.364	3.3871013803002e-07	b2	H2AFV
1.45734650681332e-11	0.584795	0.123	0.352	3.43146808494264e-07	b2	ELMO1
1.45789598435429e-11	-0.191697	0.047	0.209	3.43276188476061e-07	b2	RSRC1
1.45914528753447e-11	-0.21083	0.034	0.184	3.43570349402866e-07	b2	METTL7A
1.47966059553574e-11	-0.328514	0.026	0.167	3.48400883824845e-07	b2	HAGH
1.49340618508374e-11	-0.873834	0.016	0.146	3.51637420339818e-07	b2	PKN1
1.49795220047922e-11	-1.84414	0.013	0.14	3.52707825124837e-07	b2	MARCH3
1.50352253248763e-11	-0.884153	0.016	0.146	3.54019415499538e-07	b2	CCNQ
1.51856124128404e-11	-0.441062	0.037	0.188	3.57560429872741e-07	b2	CSNK2A1
1.53613534722487e-11	-0.336069	0.039	0.192	3.61698428857569e-07	b2	ARPC1A
1.54926189530298e-11	0.234756	0.068	0.249	3.64789205868039e-07	b2	HSPA4
1.56001595848043e-11	-0.363809	0.029	0.172	3.67321357583802e-07	b2	PPP2R3C
1.56337849164521e-11	0.643993	0.154	0.412	3.68113099642781e-07	b2	RAP1A
1.56430824320974e-11	-0.367763	0.037	0.188	3.68332018946165e-07	b2	LYPLAL1
1.56972431575916e-11	-0.453399	0.029	0.172	3.69607287388651e-07	b2	RBM27
1.58010118036259e-11	-0.228439	0.031	0.178	3.72050623928175e-07	b2	LAGE3
1.59966853039627e-11	-0.944609	0.021	0.156	3.76657952167107e-07	b2	GLRX3
1.60275958672979e-11	-0.225406	0.031	0.178	3.77385772291396e-07	b2	WIPI2
1.62253386164322e-11	-0.112356	0.05	0.212	3.82041823062513e-07	b2	GON4L
1.62656225727198e-11	-0.183708	0.052	0.218	3.82990349097261e-07	b2	WAPL
1.64797839519255e-11	0.304805	0.068	0.248	3.88032992932038e-07	b2	SEC13
1.66328005989556e-11	-0.517953	0.021	0.156	3.91635922903009e-07	b2	FBXO9
1.66529716271282e-11	-0.568576	0.037	0.187	3.9211086993236e-07	b2	LYST
1.69626141972536e-11	0.501495	0.081	0.274	3.99401713888533e-07	b2	RER1
1.70166667571548e-11	0.265329	0.084	0.278	4.00674435463967e-07	b2	G3BP1
1.70644284614799e-11	-2.47118	0.005	0.122	4.01799032554006e-07	b2	KLK1
1.71469841777229e-11	-1.74766	0.008	0.128	4.03742889448664e-07	b2	TCF3
1.73697319799171e-11	0.380856	0.055	0.224	4.08987709199127e-07	b2	OTUD6B-AS1
1.75241301095331e-11	-1.66411	0.016	0.145	4.12623167559067e-07	b2	ARIH1
1.75765687785991e-11	-0.884381	0.018	0.15	4.13857888460894e-07	b2	NCBP2AS2
1.76763196114038e-11	-1.13554	0.021	0.155	4.16206621570113e-07	b2	KATNBL1
1.77645038047889e-11	-0.951485	0.023	0.161	4.1828300658756e-07	b2	VTA1
1.77804661358839e-11	3.3454	0.097	0.015	4.18658855635523e-07	b2	LEF1
1.79540867229954e-11	5.11394	0.057	0.001	4.22746925979649e-07	b2	TRAV14DV4
1.79821069257309e-11	0.268724	0.107	0.319	4.2340668967326e-07	b2	SELENOK
1.82213013630558e-11	-0.548325	0.021	0.155	4.29038761894512e-07	b2	METTL17
1.82397232095352e-11	-0.34935	0.037	0.187	4.29472522691717e-07	b2	ZBTB1
1.85871907620997e-11	0.600662	0.125	0.357	4.376539936844e-07	b2	MCUB
1.87427959964042e-11	0.268776	0.068	0.248	4.41317874531333e-07	b2	RBBP7
1.89080120773146e-11	-0.118381	0.368	0.816	4.45208052372449e-07	b2	ATP5MC2
1.9127102406638e-11	-0.324552	0.815	0.921	4.50366753266697e-07	b2	RPS29
1.91585434421503e-11	0.535913	0.144	0.389	4.5110706388887e-07	b2	ARHGDIA
1.97490624765449e-11	0.282696	0.107	0.319	4.65011425072726e-07	b2	PRPF40A
1.9797668329185e-11	-0.409995	0.037	0.187	4.66155898478991e-07	b2	PTPRA
2.00201335581713e-11	-1.34787	0.013	0.139	4.71394064760701e-07	b2	KPNA5
2.02296137327419e-11	0.395801	0.091	0.291	4.76326484951141e-07	b2	SELENOW
2.02893292016705e-11	-0.822363	0.026	0.166	4.77732545382533e-07	b2	UTP23
2.07942207891345e-11	-0.612588	0.021	0.155	4.89620722700962e-07	b2	TBK1
2.08486105784728e-11	-0.546141	0.026	0.166	4.9090138468072e-07	b2	ELK3
2.08700512346395e-11	2.77181	0.112	0.023	4.91406226370821e-07	b2	ANXA1
2.09748345657088e-11	-0.713628	0.021	0.155	4.9387345468418e-07	b2	PLIN3
2.13726894547062e-11	0.300976	0.091	0.291	5.03241345900512e-07	b2	PSMA1
2.160113217345e-11	-0.344098	0.037	0.186	5.08620258156053e-07	b2	ZNF581
2.16742964748178e-11	-0.314142	0.538	0.878	5.1034298479606e-07	b2	RPL27
2.17931236708314e-11	0.313086	0.138	0.378	5.13140889953395e-07	b2	LITAF
2.19946133671517e-11	0.223579	0.057	0.227	5.17885166342954e-07	b2	PHF11
2.21346643022257e-11	-0.918565	0.026	0.165	5.21182805660207e-07	b2	DPF2
2.22131932357497e-11	0.400403	0.068	0.248	5.23031847928962e-07	b2	FGFR1OP2
2.22371679310734e-11	-1.69499	0.008	0.127	5.23596356105054e-07	b2	TIMM9
2.22570737625715e-11	-2.28689	0.005	0.121	5.24065058813508e-07	b2	GRAMD1C
2.24619795208202e-11	0.350546	0.157	0.412	5.28889769797232e-07	b2	PSME2
2.24708583790572e-11	-0.274727	0.034	0.181	5.2909883139328e-07	b2	IQCB1
2.25561034085128e-11	-0.77195	0.018	0.149	5.31106010856842e-07	b2	TGIF2
2.26290694499685e-11	-0.829357	0.021	0.154	5.32824069268957e-07	b2	FNIP1
2.27983795896687e-11	-0.978559	0.016	0.143	5.36810645818339e-07	b2	KDM3B
2.28086004105257e-11	-0.420848	0.044	0.2	5.37051305266238e-07	b2	RPA3
2.32398737841186e-11	0.338383	0.089	0.286	5.47206068120857e-07	b2	NAA38
2.33205506330243e-11	-0.778963	0.023	0.16	5.49105685205191e-07	b2	THAP7
2.35271850786889e-11	-0.211984	0.034	0.181	5.53971099862809e-07	b2	MRPL11
2.36518543585066e-11	-0.624017	0.031	0.175	5.56906562725396e-07	b2	PDCD7
2.36949291981121e-11	-0.862227	0.023	0.16	5.57920802898747e-07	b2	NKAP
2.37961689824753e-11	-0.328292	0.031	0.175	5.60304594861363e-07	b2	WBP1
2.46960714015463e-11	-0.349523	0.023	0.16	5.81493697220808e-07	b2	EIF2S1
2.535818428999e-11	-0.418029	0.026	0.165	5.97083807292106e-07	b2	NIT2
2.55524876557463e-11	0.4453	0.099	0.306	6.01658874342203e-07	b2	SERPINB1
2.57346852822732e-11	-0.772465	0.016	0.143	6.05948899656405e-07	b2	CBFA2T3
2.5857236162224e-11	-0.22121	0.044	0.2	6.08834482675727e-07	b2	AHSA1
2.61664696805442e-11	-0.369182	0.042	0.195	6.16115695098095e-07	b2	PTEN
2.63263655762152e-11	-0.807296	0.021	0.154	6.19880603857562e-07	b2	DGLUCY
2.64528729144507e-11	-0.162565	0.044	0.2	6.22859345643656e-07	b2	PIN1
2.64691854156403e-11	0.48866	0.102	0.309	6.23243439796667e-07	b2	NONO
2.67166942023488e-11	-0.569676	0.026	0.165	6.29071281688505e-07	b2	CCNL2
2.68247741735169e-11	0.14665	0.078	0.264	6.31616132689628e-07	b2	TMOD3
2.69187227909179e-11	-0.905823	0.026	0.164	6.33828246834954e-07	b2	EMC3
2.70808040369525e-11	-0.866691	0.013	0.137	6.37644611854083e-07	b2	BTN2A2
2.72361006543074e-11	-1.01495	0.013	0.137	6.41301226006322e-07	b2	DCTN1
2.73867582870514e-11	-0.813792	0.018	0.148	6.44848610626912e-07	b2	NOC3L
2.77716390384948e-11	0.224234	0.055	0.22	6.539110128004e-07	b2	C14orf119
2.82189063238866e-11	-1.36192	0.016	0.142	6.64442368302235e-07	b2	SLC52A2
2.84037630385734e-11	-0.185897	0.057	0.225	6.6879500450625e-07	b2	RAB6A
2.84485254039791e-11	0.476829	0.078	0.265	6.69848979162091e-07	b2	NDUFA6
2.86747277465469e-11	-0.156416	0.047	0.205	6.75175139520194e-07	b2	ETNK1
2.88271761526075e-11	-2.42086	0.008	0.126	6.78764689689297e-07	b2	SMAGP
2.89794041460352e-11	-0.284607	0.026	0.165	6.82349050022545e-07	b2	PHF6
2.96694808415204e-11	0.120406	0.063	0.235	6.9859759589444e-07	b2	TTC14
3.01297382858419e-11	0.160851	0.05	0.211	7.09434817678433e-07	b2	HSD17B11
3.13207332423578e-11	0.290046	0.068	0.245	7.37477984924557e-07	b2	IFNAR1
3.13447509493264e-11	-0.151832	0.034	0.18	7.38043505852839e-07	b2	BTF3L4
3.17761649149495e-11	0.511236	0.104	0.314	7.48201579087401e-07	b2	EMB
3.18525293551876e-11	-0.739972	0.023	0.159	7.49999656197248e-07	b2	GINM1
3.24165829536314e-11	0.5555	0.081	0.27	7.63280862226204e-07	b2	TMED5
3.2636718584883e-11	0.473877	0.151	0.4	7.68464175799654e-07	b2	NDUFS5
3.30577110504849e-11	0.420171	0.097	0.299	7.78376864394717e-07	b2	YWHAQ
3.30807953363192e-11	-0.450545	0.042	0.194	7.78920406988972e-07	b2	SCAPER
3.38365809291734e-11	-0.289169	0.034	0.179	7.96716134558317e-07	b2	QARS
3.41159428351179e-11	-0.964955	0.021	0.153	8.03293989995687e-07	b2	SERTAD2
3.41894821795187e-11	-0.605088	0.021	0.153	8.05025547398948e-07	b2	SYNGR1
3.43645164279314e-11	0.402779	0.099	0.303	8.09146903812073e-07	b2	COPS9
3.46340377393758e-11	-0.722524	0.021	0.153	8.15493052611343e-07	b2	FARS2
3.48794372174642e-11	0.452348	0.055	0.22	8.21271228722411e-07	b2	POLR2I
3.50088262641369e-11	-0.677005	0.021	0.153	8.24317823215367e-07	b2	RARS2
3.54125269877168e-11	-0.538591	0.023	0.158	8.33823360452781e-07	b2	AKAP11
3.59386328287627e-11	-0.311626	0.822	0.938	8.46211048586046e-07	b2	RPL7A
3.62442352850411e-11	0.370504	0.063	0.235	8.53406764021577e-07	b2	RAB10
3.64732862534864e-11	0.430425	0.068	0.245	8.58799998124591e-07	b2	REST
3.65533706251385e-11	0.38413	0.078	0.263	8.60685664739511e-07	b2	BNIP2
3.67470375168447e-11	-1.47557	0.01	0.13	8.65245745371626e-07	b2	BRAT1
3.70949158337298e-11	-1.11796	0.016	0.141	8.73436888221002e-07	b2	TFEC
3.73494508872818e-11	0.119091	0.068	0.244	8.79430170591937e-07	b2	PDCD5
3.77144440424408e-11	-1.08259	0.018	0.147	8.88024299423311e-07	b2	TMEM175
3.82007697379736e-11	-0.388722	0.034	0.179	8.99475324250326e-07	b2	POLR2B
3.82967394019482e-11	0.480618	0.076	0.259	9.01735025958273e-07	b2	ERICH1
3.85290569158423e-11	-0.406756	0.037	0.182	9.07205174140422e-07	b2	IDH3G
3.87848086174657e-11	-0.222006	0.399	0.835	9.13227103706848e-07	b2	COX4I1
3.90487405392669e-11	0.547153	0.131	0.363	9.19441644737579e-07	b2	RAC1
3.92293504108428e-11	-0.716029	0.016	0.141	9.23694284773704e-07	b2	DOK1
3.95100003311525e-11	-0.460695	0.031	0.173	9.30302467797317e-07	b2	RNGTT
3.99104022274785e-11	-0.526184	0.031	0.173	9.39730330848209e-07	b2	TRPT1
4.09603919152119e-11	0.309107	0.081	0.269	9.64453388035579e-07	b2	SLC2A3
4.1028249056901e-11	-0.486692	0.037	0.182	9.66051152293792e-07	b2	FBXL17
4.12065121635577e-11	-0.12387	0.029	0.168	9.7024853540313e-07	b2	UBE2Q2
4.12237344847979e-11	0.182146	0.115	0.328	9.70654052179052e-07	b2	LPP
4.13234342726617e-11	-0.48202	0.023	0.158	9.73001583384093e-07	b2	SNRNP25
4.22397148615566e-11	0.194683	0.078	0.262	9.94576326130212e-07	b2	DDX21
4.26164544048098e-11	-0.276794	0.82	0.937	1.00344703541565e-06	b2	RPL36
4.29831148153881e-11	0.387665	0.068	0.243	1.01208042144313e-06	b2	NDUFS8
4.42893094739253e-11	0.110771	0.037	0.182	1.04283608087305e-06	b2	SS18
4.51011124456879e-11	-0.562321	0.026	0.162	1.06195079364617e-06	b2	UBN1
4.55366517734467e-11	-0.324862	0.034	0.178	1.07220600265758e-06	b2	RALA
4.59512541553935e-11	-0.431076	0.026	0.162	1.0819682303429e-06	b2	STAMBPL1
4.66814815264487e-11	0.224057	0.057	0.224	1.09916216402176e-06	b2	CNIH1
4.67719910560917e-11	-0.605426	0.029	0.167	1.10129330140674e-06	b2	ZNF652
4.74338244786923e-11	0.482838	0.112	0.326	1.11687683117529e-06	b2	CDK2AP2
4.75441025672904e-11	-0.222341	0.446	0.848	1.11947343904942e-06	b2	RPL31
4.75718899952839e-11	0.341708	0.063	0.233	1.12012772182895e-06	b2	LRPAP1
4.90300731680097e-11	-2.32325	0.005	0.117	1.15446210281396e-06	b2	NBPF10
5.02372098936274e-11	-0.690219	0.029	0.167	1.18288534415535e-06	b2	CHMP3
5.05269333291495e-11	-3.35378	0.008	0.122	1.18970717216815e-06	b2	STAG3
5.08907618954382e-11	0.320969	0.084	0.271	1.19827387958999e-06	b2	MRPL41
5.12091845151338e-11	-0.4424	0.023	0.156	1.20577145859334e-06	b2	GTF2F2
5.16400364100527e-11	-1.49106	0.013	0.134	1.2159162973111e-06	b2	CCDC6
5.17882992443795e-11	0.555432	0.141	0.38	1.21940729400816e-06	b2	RALY
5.18608645864091e-11	-0.466239	0.023	0.156	1.22111591755159e-06	b2	DDX42
5.25910210913823e-11	-1.43931	0.013	0.134	1.23830818261769e-06	b2	LARGE2
5.4160273457928e-11	0.471857	0.112	0.326	1.27525779884037e-06	b2	PRDX2
5.60990622673998e-11	0.248738	0.057	0.222	1.3209085201482e-06	b2	FRG1
5.64250949107417e-11	0.447267	0.055	0.218	1.32858528476832e-06	b2	CPNE3
5.6747044782544e-11	-0.157551	0.044	0.197	1.33616591644978e-06	b2	SNRPA1
5.67645033759935e-11	-0.209748	0.039	0.187	1.33657699649114e-06	b2	NSRP1
5.70777243910756e-11	-0.355666	0.034	0.177	1.34395209851227e-06	b2	RNF111
5.77579674859395e-11	0.387815	0.05	0.207	1.35996910242393e-06	b2	VHL
5.80180742752834e-11	-1.35927	0.016	0.139	1.36609357688582e-06	b2	HTT
5.8179694608189e-11	0.219014	0.06	0.227	1.36989908924442e-06	b2	SAFB
5.86673085253155e-11	-1.24892	0.013	0.134	1.38138044653708e-06	b2	SEC22B
5.86675129120436e-11	0.107582	0.055	0.217	1.38138525902698e-06	b2	STMP1
5.88061659535376e-11	0.297777	0.07	0.246	1.384649983542e-06	b2	TMCO1
5.89348551983597e-11	-1.30519	0.013	0.134	1.38768010050058e-06	b2	FARP2
6.05207181228635e-11	-0.247033	0.026	0.161	1.42502082892094e-06	b2	VPS4A
6.17909545105938e-11	-1.69959	0.01	0.128	1.45492981490644e-06	b2	FCRL3
6.25139038533902e-11	-1.68953	0.01	0.128	1.47195238013193e-06	b2	TMA16
6.35398190829437e-11	-2.42633	0.005	0.116	1.49610858012699e-06	b2	BSCL2
6.43204847218534e-11	-0.148062	0.057	0.222	1.51449013326076e-06	b2	LAMP1
6.43209666805739e-11	-2.0149	0.008	0.122	1.51450148146079e-06	b2	B3GALT4
6.52393875708707e-11	0.168787	0.057	0.222	1.53612661974372e-06	b2	TMC8
6.53928415797774e-11	-1.06305	0.018	0.145	1.53973984783744e-06	b2	INKA1
6.55355913287432e-11	-0.775077	0.018	0.145	1.54310103342659e-06	b2	GNPAT
6.57911016201822e-11	0.458563	0.102	0.306	1.54911727874881e-06	b2	SRI
6.70159359714716e-11	0.244231	0.052	0.211	1.57795722838427e-06	b2	MED4
6.75557485992112e-11	-0.50129	0.039	0.185	1.59066765651703e-06	b2	CAMK2D
6.76191460531925e-11	-1.78847	0.013	0.133	1.59216041296847e-06	b2	TSPAN13
6.80903926554065e-11	0.360791	0.042	0.192	1.6032563854642e-06	b2	INTS10
6.88838978514679e-11	-1.219	0.016	0.139	1.62194025881066e-06	b2	SGMS1
6.90966639508812e-11	0.29957	0.073	0.25	1.62695004938745e-06	b2	CTDSP1
7.10596530581244e-11	-0.10664	0.039	0.186	1.6731705909066e-06	b2	MMP24OS
7.15505920019427e-11	-0.692432	0.029	0.165	1.68473023927774e-06	b2	NDUFAF4
7.27256101677245e-11	-0.676442	0.029	0.165	1.71239721700924e-06	b2	VPS72
7.41077374172886e-11	-0.432082	0.026	0.16	1.74494078522748e-06	b2	ING4
7.45949469984641e-11	-0.19058	0.42	0.833	1.75641262202584e-06	b2	RPL7
7.58810711351378e-11	0.364572	0.086	0.275	1.78669570094796e-06	b2	KMT2A
7.60764797359403e-11	0.609162	0.157	0.408	1.79129679186245e-06	b2	COX5A
7.68079467525624e-11	-1.50745	0.021	0.148	1.80851991423583e-06	b2	FCRL5
7.69264948511003e-11	-0.741321	0.023	0.154	1.81131124776401e-06	b2	RMC1
7.83410448590191e-11	-0.636399	0.026	0.159	1.84461824225046e-06	b2	MRPS23
8.01386634825558e-11	-2.48044	0.008	0.121	1.88694497036026e-06	b2	TP53I11
8.025901113799e-11	0.325949	0.227	0.539	1.88977867625511e-06	b2	TMEM258
8.05905895932548e-11	-0.108076	0.029	0.165	1.89758602256278e-06	b2	EHD1
8.1360101900161e-11	-3.3421	0.003	0.109	1.91570495934119e-06	b2	COCH
8.14860347862619e-11	-2.17153	0.008	0.121	1.91867017507732e-06	b2	AC027097.2
8.20722953627387e-11	0.53464	0.078	0.258	1.93247426661104e-06	b2	OS9
8.50442616982352e-11	-0.310591	0.859	0.976	2.00245218594665e-06	b2	HLA-B
8.52906771549738e-11	-0.812369	0.018	0.143	2.00825428429101e-06	b2	ARHGAP27
8.69060161327571e-11	0.517442	0.063	0.231	2.0462890558619e-06	b2	RC3H1
8.74115720919616e-11	-0.151392	0.044	0.194	2.05819287647733e-06	b2	FUNDC2
8.74956692734811e-11	0.177164	0.063	0.229	2.06017302871339e-06	b2	AKR1B1
8.7972094312111e-11	0.335001	0.094	0.288	2.07139093267297e-06	b2	RAB11A
8.88639890676513e-11	-0.674698	0.026	0.159	2.09239148658692e-06	b2	LIMD1
9.01130640574237e-11	-0.467818	0.039	0.185	2.1218022062961e-06	b2	ZHX2
9.06216192007328e-11	0.408277	0.258	0.611	2.13377664570045e-06	b2	COX6A1
9.08713195555663e-11	0.43402	0.06	0.225	2.13965609025536e-06	b2	HERC1
9.22818440147979e-11	-0.627736	0.023	0.153	2.17286829917243e-06	b2	ABTB1
9.26502381017605e-11	-0.269402	0.93	0.95	2.18154250634405e-06	b2	RPS14
9.3180282080043e-11	-0.687696	0.026	0.159	2.19402292185669e-06	b2	LINC02245
9.33156427317292e-11	0.257747	0.086	0.273	2.1972101237613e-06	b2	PPA1
9.33725273835546e-11	-0.606358	0.026	0.159	2.19854952977318e-06	b2	DERL2
9.37467940112935e-11	0.318195	0.073	0.25	2.20736201178992e-06	b2	SMARCE1
9.47192461074308e-11	-0.669145	0.021	0.148	2.23025936884557e-06	b2	CEP63
9.63497966647625e-11	-0.521528	0.021	0.148	2.2686523122685e-06	b2	LPCAT1
9.7591759862525e-11	-0.838375	0.018	0.142	2.29789557772301e-06	b2	ZNF593
9.83483700917972e-11	-0.461219	0.029	0.164	2.31571072218146e-06	b2	RNPC3
1.00333043007445e-10	-0.405767	0.021	0.148	2.36244183065329e-06	b2	UTP6
1.00375545360051e-10	0.722546	0.097	0.294	2.36344259104777e-06	b2	BSG
1.00972328360898e-10	-0.215925	0.026	0.159	2.37749444358569e-06	b2	LRRK2
1.01597405469846e-10	-0.317402	0.026	0.159	2.39221250919299e-06	b2	UCKL1
1.03321467233284e-10	-0.601738	0.047	0.197	2.43280726747491e-06	b2	ERC1
1.03460353465472e-10	-0.512605	0.029	0.164	2.43607748269801e-06	b2	RFX3
1.04253580127182e-10	0.576094	0.078	0.259	2.45475479767462e-06	b2	PRPF38B
1.04301977189466e-10	-0.261702	0.029	0.164	2.45589435490317e-06	b2	RAB4A
1.05364045792713e-10	-0.126634	0.037	0.179	2.48090182223522e-06	b2	ATG5
1.05683979504553e-10	3.95843	0.097	0.018	2.48843498141422e-06	b2	BCL11B
1.06460882736969e-10	-0.712638	0.018	0.142	2.50672794492466e-06	b2	ATP2B1-AS1
1.07599075920435e-10	0.108722	0.06	0.224	2.53352784162256e-06	b2	FAM133B
1.07640570883498e-10	-2.94948	0.005	0.114	2.53450488202285e-06	b2	TATDN3
1.07710838077302e-10	-2.03162	0.008	0.12	2.53615939336815e-06	b2	MVD
1.07969641223161e-10	0.591811	0.063	0.229	2.54225317224055e-06	b2	DAP3
1.07997810489362e-10	0.142564	0.055	0.214	2.54291644578251e-06	b2	ERBIN
1.0838004486519e-10	0.326374	0.086	0.271	2.55191653639577e-06	b2	PRRC2B
1.1016018189436e-10	0.188261	0.044	0.194	2.59383164288461e-06	b2	HDAC2
1.10301404738145e-10	-1.83068	0.005	0.114	2.59715687596436e-06	b2	TESK2
1.10607485800617e-10	-0.151196	0.029	0.164	2.60436386066134e-06	b2	CDK4
1.11018785248239e-10	-0.189523	0.037	0.179	2.61404831745504e-06	b2	BRWD1
1.14898148741143e-10	0.150695	0.068	0.238	2.70539181025896e-06	b2	FLOT1
1.15617048200273e-10	0.406919	0.044	0.194	2.72231901692363e-06	b2	ARPP19
1.21304532567303e-10	0.136517	0.047	0.199	2.85623652382971e-06	b2	ALDH9A1
1.21760257300841e-10	-0.89446	0.016	0.136	2.86696701840559e-06	b2	PSPC1
1.23639997435099e-10	-0.947488	0.013	0.13	2.91122737960685e-06	b2	PMPCA
1.2435601995903e-10	0.18887	0.07	0.243	2.92808684595532e-06	b2	ATP6AP2
1.25611347015807e-10	-0.725272	0.021	0.147	2.95764477683419e-06	b2	ORAI1
1.26415604513764e-10	-0.759169	0.021	0.147	2.97658182388108e-06	b2	ATP6V1A
1.27864187459475e-10	-0.266717	0.034	0.173	3.0106901579208e-06	b2	ITGAE
1.28193681896542e-10	-6.86686	0	0.101	3.01844843393599e-06	b2	CEP290
1.28193727338261e-10	-6.80855	0	0.101	3.0184495039067e-06	b2	C12orf74
1.28962615123738e-10	-0.55898	0.023	0.152	3.03655373570353e-06	b2	MAPKAP1
1.29161181835936e-10	0.450991	0.06	0.224	3.04122918750896e-06	b2	MARCH7
1.29891806700331e-10	-0.155013	0.037	0.178	3.058432480566e-06	b2	CCDC174
1.30216695255623e-10	0.286309	0.052	0.209	3.06608230648889e-06	b2	SPTBN1
1.30841532156188e-10	0.185085	0.044	0.193	3.08079471614961e-06	b2	TIMM8B
1.37969160603793e-10	0.2829	0.055	0.213	3.24862185557691e-06	b2	TMUB1
1.39389307539538e-10	-1.06895	0.01	0.124	3.28206063532596e-06	b2	TTC9C
1.40577538511566e-10	3.99146	0.11	0.025	3.31003872179333e-06	b2	NKG7
1.42863121564647e-10	-0.734591	0.023	0.152	3.36385506036117e-06	b2	CAND1
1.42999706372716e-10	-0.842546	0.018	0.141	3.36707108625198e-06	b2	ABI3
1.44351306539959e-10	-1.36687	0.008	0.118	3.39889586378988e-06	b2	PRDM4
1.44663144248761e-10	-0.494332	0.039	0.181	3.40623839448132e-06	b2	RAD51B
1.46551783041095e-10	-0.882169	0.021	0.146	3.45070828348563e-06	b2	ZNF431
1.46790380249734e-10	-0.517399	0.023	0.152	3.45632629336024e-06	b2	KIF20B
1.48581746327164e-10	-0.676712	0.023	0.15	3.49850579901941e-06	b2	BET1
1.49493499195855e-10	0.268486	0.05	0.203	3.5199739320656e-06	b2	PARP4
1.50182564818306e-10	-0.218116	0.026	0.156	3.53619867121183e-06	b2	UBE2W
1.52275191659273e-10	0.283814	0.086	0.27	3.58547166280924e-06	b2	TMED2
1.52369503759037e-10	0.420998	0.073	0.246	3.58769233551029e-06	b2	SLIRP
1.53966101743985e-10	0.505846	0.084	0.267	3.62528583166388e-06	b2	LTA4H
1.5681768821162e-10	-0.872295	0.016	0.135	3.6924292866308e-06	b2	DEDD2
1.57299991248505e-10	-0.856824	0.018	0.14	3.7037855939373e-06	b2	GPS1
1.57435074958075e-10	-0.139933	0.026	0.156	3.70696627496283e-06	b2	MRPL9
1.58911314000504e-10	2.80851	0.209	0.091	3.74172579945588e-06	b2	CCL5
1.60174328057014e-10	0.495534	0.078	0.256	3.77146472843046e-06	b2	KIF5B
1.61943365090149e-10	-0.660498	0.021	0.146	3.81311847441264e-06	b2	LETMD1
1.62632182173216e-10	-0.721782	0.021	0.146	3.82933736145054e-06	b2	REXO2
1.6353850687896e-10	0.43662	0.063	0.227	3.85067768297199e-06	b2	RNF216
1.6388231448516e-10	0.536608	0.175	0.441	3.85877297686759e-06	b2	RAP1B
1.65989520671776e-10	-0.159875	0.034	0.172	3.90838925373765e-06	b2	ARHGEF18
1.69274807083823e-10	0.493658	0.078	0.257	3.98574460759569e-06	b2	MRPS24
1.72345584045424e-10	0.148367	0.044	0.192	4.05804912193356e-06	b2	PREX1
1.7807452787004e-10	0.213452	0.034	0.172	4.19294283322796e-06	b2	ACAT2
1.78167320575285e-10	0.120964	0.342	0.762	4.19512773026565e-06	b2	MIF
1.81418992731946e-10	-0.326548	0.037	0.177	4.27169160286641e-06	b2	RPS6KA1
1.82439728743496e-10	-0.217286	0.958	0.961	4.29572585299435e-06	b2	RPS15A
1.82675581972776e-10	-0.460516	0.023	0.15	4.30127925313099e-06	b2	PRPSAP2
1.83039602212334e-10	-0.798507	0.018	0.14	4.30985047369162e-06	b2	ATG4B
1.84102225216263e-10	0.550128	0.11	0.313	4.33487099494213e-06	b2	P4HB
1.85517804811058e-10	0.232866	0.065	0.23	4.36820223208118e-06	b2	ECHDC1
1.85520198251925e-10	0.344821	0.05	0.201	4.36825858803984e-06	b2	DCP2
1.86147379983109e-10	0.443752	0.078	0.256	4.38302620908228e-06	b2	DNAJC7
1.86671074794285e-10	-0.444146	0.026	0.155	4.39535712710624e-06	b2	ZSWIM7
1.87497134198741e-10	-1.51963	0.008	0.117	4.41480752184355e-06	b2	DPEP2
1.94520327641904e-10	0.136296	0.044	0.192	4.58017563465627e-06	b2	NAA50
1.9917917955055e-10	-1.03827	0.021	0.145	4.68987296169725e-06	b2	SNAPIN
1.99297254538027e-10	0.599062	0.12	0.334	4.69265315535238e-06	b2	MAX
2.00942821124651e-10	-0.19756	0.423	0.835	4.73139966620104e-06	b2	RPL27A
2.02642603096184e-10	0.391441	0.07	0.241	4.77142273250274e-06	b2	DDX3X
2.02671062480425e-10	-0.187112	0.044	0.191	4.77209283716408e-06	b2	SRP54
2.02894742730277e-10	-0.115419	0.057	0.214	4.7773596123271e-06	b2	KAT6A
2.06168655625605e-10	-1.0354	0.018	0.139	4.8544471653605e-06	b2	COPS2
2.10555512559353e-10	0.406707	0.277	0.645	4.95774009872252e-06	b2	HCLS1
2.11571717489525e-10	0.277019	0.086	0.268	4.98166766000835e-06	b2	TCF12
2.13024545873303e-10	0.775492	0.081	0.261	5.01587595713279e-06	b2	SARS
2.16775775145215e-10	-0.169169	0.06	0.219	5.10420240156922e-06	b2	LARS
2.1819990081628e-10	-0.453746	0.029	0.16	5.13773486462013e-06	b2	EBAG9
2.18323413842252e-10	0.313242	0.042	0.186	5.14064310232968e-06	b2	CDC5L
2.18862779371e-10	0.448544	0.052	0.205	5.15334300306956e-06	b2	RASA2
2.20479174499293e-10	-1.11325	0.013	0.128	5.19140264276034e-06	b2	COX19
2.20732654843107e-10	-0.523703	0.023	0.149	5.1973710909358e-06	b2	GPR108
2.24473050563716e-10	-0.855173	0.026	0.154	5.28544244857326e-06	b2	SNHG12
2.2544652905455e-10	0.438207	0.097	0.289	5.30836397311843e-06	b2	PRPF8
2.26711615811968e-10	-0.544704	0.034	0.169	5.3381517059086e-06	b2	COA3
2.27599827698334e-10	-0.413873	0.029	0.16	5.35906554298498e-06	b2	ALDH16A1
2.30196608640216e-10	-1.48701	0.01	0.122	5.42020934704253e-06	b2	AC104699.1
2.30727995032684e-10	-1.33196	0.01	0.122	5.43272137103959e-06	b2	ERI3
2.32547651032938e-10	0.638164	0.211	0.511	5.47556699122157e-06	b2	GMFG
2.32638805963891e-10	-0.398648	0.042	0.185	5.47771332522578e-06	b2	UMAD1
2.37982894546846e-10	-0.18976	0.031	0.165	5.60354523500003e-06	b2	LYPLA2
2.40467565000544e-10	-0.619307	0.037	0.174	5.66204928550281e-06	b2	SUCLG1
2.4232087977949e-10	-0.639463	0.021	0.143	5.70568743528787e-06	b2	TTN
2.42407426922221e-10	-0.633263	0.018	0.139	5.70772527431061e-06	b2	ACD
2.43552193675488e-10	0.157699	0.037	0.175	5.73467995228304e-06	b2	SAMD9
2.4448704030779e-10	0.185541	0.037	0.175	5.75669185108723e-06	b2	KDM7A
2.49691947286013e-10	0.120875	0.037	0.175	5.87924659079647e-06	b2	ARL6IP6
2.53211229623663e-10	0.362794	0.078	0.254	5.96211161271877e-06	b2	USP3
2.53732842838869e-10	0.243807	0.172	0.422	5.97439351748401e-06	b2	UBE2J1
2.55139022072454e-10	-0.734708	0.029	0.159	6.00750341371801e-06	b2	CDKN1A
2.56373092203691e-10	-0.951632	0.016	0.133	6.03656082902811e-06	b2	REPIN1
2.56436544135613e-10	-1.35372	0.018	0.137	6.03805486821715e-06	b2	ARFRP1
2.58199322948041e-10	-0.102551	0.05	0.199	6.07956125813458e-06	b2	PIK3R5
2.58934392783775e-10	0.130734	0.06	0.219	6.09686921248676e-06	b2	TRADD
2.60392120269577e-10	-0.652961	0.021	0.143	6.13119286386747e-06	b2	EIF4EBP1
2.61500104888216e-10	-0.78221	0.016	0.133	6.15728146969794e-06	b2	SH2B2
2.6486610846846e-10	0.317945	0.068	0.235	6.23653738999835e-06	b2	SNRPD1
2.6582119450238e-10	0.485298	0.076	0.249	6.25902584575303e-06	b2	DNAJA2
2.66582177688353e-10	0.447143	0.039	0.18	6.27694395584995e-06	b2	LENG8
2.71364272053616e-10	-0.156315	0.037	0.174	6.38954314977445e-06	b2	MYO5A
2.74153166834702e-10	-0.262296	0.042	0.184	6.45521046628988e-06	b2	BAG6
2.75906064502203e-10	-1.35614	0.01	0.121	6.49648419476886e-06	b2	COL4A4
2.76223258364446e-10	-0.738481	0.023	0.148	6.50395284144925e-06	b2	TNIP2
2.79815613765875e-10	0.144623	0.042	0.185	6.58853844173129e-06	b2	PPM1B
2.81406141517225e-10	0.142112	0.047	0.193	6.62598900816458e-06	b2	ATF4
2.81554025965228e-10	-0.538457	0.021	0.143	6.62947109537727e-06	b2	CTNNBL1
2.82582001702357e-10	-0.466022	0.018	0.137	6.6536758120837e-06	b2	PDE6D
2.84244302637571e-10	0.426922	0.081	0.257	6.69281634990424e-06	b2	NRDC
2.85613580040724e-10	-1.8557	0.01	0.121	6.72505735563888e-06	b2	ZNRD2
2.86199296584893e-10	0.20275	0.068	0.233	6.73884863738789e-06	b2	HERC4
2.88403443459858e-10	-0.244451	0.956	0.967	6.79074747970582e-06	b2	RPL13
2.90230700224912e-10	-0.325891	0.034	0.169	6.83377206749578e-06	b2	NAA20
2.93286086890242e-10	-0.411257	0.029	0.159	6.90571420191763e-06	b2	XKR6
2.97600868618622e-10	-0.119471	0.039	0.179	7.00731005249408e-06	b2	PPP1CB
3.04634394572347e-10	-1.10373	0.01	0.121	7.17292145460049e-06	b2	GOSR2
3.07129614930556e-10	-2.06639	0.008	0.115	7.23167391315488e-06	b2	DNASE2
3.07417258130519e-10	-3.35536	0.003	0.103	7.2384467599412e-06	b2	SLC2A11
3.0815873935262e-10	-0.998157	0.01	0.121	7.2559056767968e-06	b2	MRM2
3.13870641361483e-10	0.17725	0.06	0.219	7.39039812149748e-06	b2	ZMAT2
3.14106176854193e-10	0.133075	0.042	0.184	7.39594404020884e-06	b2	EP300
3.14895223832055e-10	-0.954599	0.016	0.132	7.41452294034957e-06	b2	MRPL27
3.18930227295901e-10	-1.89112	0.005	0.109	7.50953113190928e-06	b2	MCOLN2
3.22450775709811e-10	0.435583	0.193	0.467	7.59242596486322e-06	b2	TLE5
3.23570077140976e-10	0.371092	0.06	0.218	7.61878103636142e-06	b2	ANKRD10
3.24455957458395e-10	-0.202256	0.065	0.226	7.63963997431536e-06	b2	FBXW7
3.328187544267e-10	0.102221	0.065	0.227	7.83655039173107e-06	b2	SMARCC2
3.39784639532235e-10	-1.37495	0.018	0.136	8.00056912242601e-06	b2	ZNF75A
3.41110846508587e-10	-0.278384	0.026	0.153	8.03179599189118e-06	b2	MFSD5
3.43104149385888e-10	-0.885634	0.021	0.142	8.07873030144012e-06	b2	PRPF3
3.50652807643472e-10	5.8875	0.065	0.006	8.25647100877319e-06	b2	MAL
3.54896634601244e-10	0.381952	0.094	0.28	8.3563961583209e-06	b2	LBR
3.55659513065946e-10	0.126159	0.037	0.173	8.37435889465076e-06	b2	TRIM8
3.59251254313351e-10	0.387351	0.068	0.232	8.45893003406216e-06	b2	NUCB1
3.59580898162444e-10	0.393416	0.084	0.262	8.46669182813292e-06	b2	CDK5RAP3
[truncated: 21,165 more rows]

## Sheet: pbmc.myeloidL2.markers
p_val	avg_log2FC	pct.1	pct.2	p_val_adj	cluster	gene
0	0.553666	0.909	0.523	0	CD14M_1	S100A12
0	0.652889	0.864	0.486	0	CD14M_1	CD14
0	0.371261	0.828	0.5	0	CD14M_1	CSF3R
0	0.382846	0.878	0.556	0	CD14M_1	MS4A6A
0	0.537256	0.678	0.359	0	CD14M_1	CD99
0	0.570706	0.679	0.362	0	CD14M_1	CAPG
0	0.450111	0.691	0.387	0	CD14M_1	CD36
0	0.494185	0.743	0.44	0	CD14M_1	BLVRB
0	0.449172	0.701	0.411	0	CD14M_1	PGD
0	0.47044	0.81	0.521	0	CD14M_1	APLP2
0	0.513432	0.614	0.33	0	CD14M_1	PLBD1
0	0.477711	0.82	0.536	0	CD14M_1	CTSD
0	0.440928	0.628	0.345	0	CD14M_1	PLP2
0	0.256957	0.641	0.36	0	CD14M_1	PLCB1
0	0.392983	0.619	0.349	0	CD14M_1	CRTAP
0	0.56139	0.532	0.262	0	CD14M_1	METTL9
0	0.40165	0.859	0.589	0	CD14M_1	GRN
0	0.319393	0.846	0.579	0	CD14M_1	ANXA2
0	0.47234	0.656	0.39	0	CD14M_1	LGALS2
0	0.353389	0.832	0.567	0	CD14M_1	ANXA1
0	0.318406	0.624	0.359	0	CD14M_1	MEGF9
0	0.45474	0.574	0.309	0	CD14M_1	ALDH2
0	0.634592	0.985	0.721	0	CD14M_1	VCAN
0	0.498546	0.539	0.282	0	CD14M_1	KCTD12
0	0.384464	0.819	0.562	0	CD14M_1	PKM
0	0.800161	0.404	0.15	0	CD14M_1	MGST1
0	0.294211	0.531	0.278	0	CD14M_1	SELL
0	0.224349	0.682	0.43	0	CD14M_1	LRMDA
0	0.253144	0.641	0.389	0	CD14M_1	FPR1
0	0.338794	0.882	0.631	0	CD14M_1	EIF4A1
0	0.252101	0.661	0.411	0	CD14M_1	AGTRAP
0	0.351578	0.89	0.64	0	CD14M_1	TALDO1
0	0.278374	0.767	0.518	0	CD14M_1	NCF2
0	0.258135	0.656	0.408	0	CD14M_1	IL17RA
0	0.359106	0.727	0.479	0	CD14M_1	UQCRH
0	0.302781	0.637	0.389	0	CD14M_1	LRP1
0	0.255663	0.758	0.511	0	CD14M_1	SERPINB1
0	0.346229	0.557	0.312	0	CD14M_1	CDA
0	0.283707	0.778	0.533	0	CD14M_1	HCST
0	0.397354	0.484	0.241	0	CD14M_1	NAIP
0	0.312521	0.73	0.487	0	CD14M_1	ATP5MPL
0	0.331892	0.582	0.34	0	CD14M_1	NUP214
0	0.237242	0.649	0.412	0	CD14M_1	SDCBP
0	0.304556	0.929	0.693	0	CD14M_1	MNDA
0	0.261138	0.67	0.435	0	CD14M_1	LAMTOR1
0	0.349751	0.557	0.323	0	CD14M_1	LY86
0	0.535879	0.421	0.187	0	CD14M_1	ITGAM
0	0.28027	0.634	0.401	0	CD14M_1	LTA4H
0	0.234706	0.532	0.3	0	CD14M_1	RBP7
0	0.549646	0.465	0.234	0	CD14M_1	HMGB2
0	0.223329	0.631	0.401	0	CD14M_1	FBXL5
0	0.220836	0.568	0.339	0	CD14M_1	GLIPR2
0	0.220038	0.593	0.367	0	CD14M_1	RBM47
0	0.416867	0.532	0.309	0	CD14M_1	COMT
0	0.206432	0.563	0.342	0	CD14M_1	GAS7
0	0.318034	0.919	0.699	0	CD14M_1	TKT
0	0.399341	0.471	0.251	0	CD14M_1	ASGR1
0	0.449526	0.517	0.304	0	CD14M_1	SNHG6
0	0.515197	0.466	0.255	0	CD14M_1	MYADM
0	0.261075	0.524	0.314	0	CD14M_1	BNIP3L
0	0.231043	0.477	0.269	0	CD14M_1	TRPS1
0	1.36556	0.289	0.081	0	CD14M_1	CES1
0	0.773464	0.311	0.105	0	CD14M_1	PADI4
0	0.324407	0.51	0.304	0	CD14M_1	TGFBI
0	0.354479	0.383	0.178	0	CD14M_1	SLC2A3
0	0.370786	0.401	0.198	0	CD14M_1	KIF13A
0	0.207619	0.434	0.231	0	CD14M_1	ARHGAP24
0	0.551892	0.448	0.248	0	CD14M_1	GAS5
0	0.437362	0.36	0.16	0	CD14M_1	MPP7
0	0.531462	0.478	0.278	0	CD14M_1	SNHG5
0	0.516871	0.411	0.213	0	CD14M_1	PLD3
0	0.373031	0.966	0.77	0	CD14M_1	LGALS1
0	0.410671	0.376	0.181	0	CD14M_1	RNASE6
0	0.271942	0.4	0.206	0	CD14M_1	RAB27A
0	0.399337	0.426	0.232	0	CD14M_1	PNPLA2
0	0.406109	0.39	0.197	0	CD14M_1	PSTPIP1
0	0.863026	0.313	0.122	0	CD14M_1	STAB1
0	0.263215	0.413	0.222	0	CD14M_1	CD93
0	0.431428	0.334	0.146	0	CD14M_1	LINC00937
0	0.357724	0.39	0.203	0	CD14M_1	PTAFR
0	0.225294	0.383	0.197	0	CD14M_1	AC020656.1
0	0.449774	0.974	0.789	0	CD14M_1	RPL37A
0	0.520929	0.337	0.153	0	CD14M_1	BST1
0	0.399641	0.331	0.147	0	CD14M_1	EMB
0	0.406591	0.384	0.2	0	CD14M_1	AL034397.3
0	0.806228	0.305	0.122	0	CD14M_1	F13A1
0	0.316352	0.395	0.215	0	CD14M_1	TTC7A
0	0.239372	0.365	0.187	0	CD14M_1	CREB5
0	-4.94966	0.036	0.212	0	CD14M_1	FCGR3A
0	0.476364	0.339	0.168	0	CD14M_1	CREG1
0	0.372897	0.323	0.152	0	CD14M_1	MICAL2
0	0.40494	0.353	0.182	0	CD14M_1	FES
0	0.353844	0.316	0.146	0	CD14M_1	CLEC4E
0	0.591252	0.299	0.129	0	CD14M_1	CD163
0	0.387838	0.361	0.191	0	CD14M_1	TMEM205
0	0.415389	0.34	0.172	0	CD14M_1	DGKZ
0	0.411104	0.346	0.178	0	CD14M_1	MSRB1
0	0.219423	0.33	0.163	0	CD14M_1	GLT1D1
0	0.315212	0.977	0.811	0	CD14M_1	TSPO
0	0.314119	0.984	0.82	0	CD14M_1	RPS6
0	0.392233	0.336	0.174	0	CD14M_1	EVI2A
0	0.458972	0.321	0.159	0	CD14M_1	ZNF467
0	0.343501	0.316	0.155	0	CD14M_1	PXN
0	0.372748	0.296	0.138	0	CD14M_1	NFE2
0	0.364958	0.3	0.143	0	CD14M_1	CYP1B1
0	0.47404	0.278	0.125	0	CD14M_1	CLMN
0	0.50031	0.302	0.149	0	CD14M_1	ETHE1
0	0.345666	0.28	0.128	0	CD14M_1	NLRP12
0	0.85175	0.239	0.093	0	CD14M_1	NRG1
0	0.759726	0.215	0.07	0	CD14M_1	QPCT
0	-2.96394	0.061	0.206	0	CD14M_1	IFITM1
0	0.518036	0.235	0.09	0	CD14M_1	CRISPLD2
0	-2.83093	0.069	0.208	0	CD14M_1	RHOC
0	0.280085	0.979	0.843	0	CD14M_1	S100A10
0	0.684337	0.237	0.104	0	CD14M_1	RETN
0	0.34797	0.991	0.859	0	CD14M_1	FCN1
0	1.27237	0.185	0.053	0	CD14M_1	RNASE2
0	0.657475	0.219	0.091	0	CD14M_1	PDE4D
0	0.286464	0.999	0.873	0	CD14M_1	S100A8
0	0.547568	0.205	0.082	0	CD14M_1	FOLR3
0	-4.68071	0.013	0.135	0	CD14M_1	CDKN1C
0	0.35386	0.992	0.871	0	CD14M_1	RPS18
0	0.300354	0.989	0.876	0	CD14M_1	RPS9
0	1.17498	0.999	0.903	0	CD14M_1	S100A9
0	0.270795	0.994	0.899	0	CD14M_1	RPS2
0	0.43875	0.993	0.9	0	CD14M_1	VIM
0	-5.65206	0.003	0.092	0	CD14M_1	HES4
0	0.362807	0.996	0.919	0	CD14M_1	GAPDH
0	0.305677	0.998	0.93	0	CD14M_1	RPL26
0	0.520758	1	0.938	0	CD14M_1	LYZ
0	0.293841	0.998	0.938	0	CD14M_1	RPL37
0	0.313466	0.999	0.954	0	CD14M_1	TPT1
0	0.345394	0.999	0.956	0	CD14M_1	RPL13
0	0.238907	0.999	0.959	0	CD14M_1	RPS14
0	0.27002	1	0.987	0	CD14M_1	RPLP1
0	-0.458519	1	0.99	0	CD14M_1	FTH1
0	-0.338993	1	0.991	0	CD14M_1	B2M
2.20254125229302e-304	0.589007	0.168	0.06	5.58366232868804e-300	CD14M_1	MCEMP1
1.15934186959385e-302	0.333503	0.895	0.664	2.93904757360736e-298	CD14M_1	RPL38
3.92564821182126e-302	0.315915	0.93	0.705	9.95191078178808e-298	CD14M_1	RPL27
4.6782010614977e-302	0.391691	0.355	0.189	1.18597075110028e-297	CD14M_1	TMTC2
1.05066456161125e-301	0.246613	0.649	0.42	2.66353973014067e-297	CD14M_1	ATP6V1F
2.19435496887087e-301	0.340705	0.287	0.137	5.56290928158453e-297	CD14M_1	SMARCD3
1.9236717651342e-299	0.393893	0.273	0.129	4.8767002917917e-295	CD14M_1	CKAP4
2.75729866498801e-298	-0.42116	0.98	0.88	6.99002784561111e-294	CD14M_1	AIF1
3.12370282643217e-298	0.152531	0.854	0.598	7.91889903528819e-294	CD14M_1	CSTA
1.96575200594412e-293	0.505344	0.224	0.097	4.98337791026893e-289	CD14M_1	TPCN1
2.80096021433431e-293	0.657577	0.203	0.084	7.10071423935892e-289	CD14M_1	CCR2
1.39667802490511e-291	0.203255	0.511	0.311	3.54071846093694e-287	CD14M_1	RTN3
7.17244942356536e-290	0.273218	0.521	0.324	1.81828765336806e-285	CD14M_1	RAB5IF
1.02279729941601e-287	0.300807	0.36	0.195	2.59289343374952e-283	CD14M_1	HEXB
1.27378921494523e-285	0.197523	0.36	0.192	3.22918303880765e-281	CD14M_1	FAM200B
2.97506302230489e-285	0.280508	0.377	0.209	7.54208226784513e-281	CD14M_1	GTF2I
1.39776330421697e-284	0.238613	0.854	0.614	3.54346975252043e-280	CD14M_1	CEBPD
2.96591813458623e-284	0.265555	0.481	0.291	7.51889906298955e-280	CD14M_1	P4HB
3.76177944590628e-284	0.351483	0.252	0.117	9.536487073317e-280	CD14M_1	ST6GALNAC3
1.45613443726351e-283	0.329786	0.249	0.114	3.69144641190672e-279	CD14M_1	VNN2
1.4637976603578e-283	0.202587	0.41	0.231	3.71087344877306e-279	CD14M_1	FTX
9.05356887657165e-283	0.211439	0.817	0.555	2.29517024589968e-278	CD14M_1	NCF1
2.93231548598545e-282	0.272772	0.356	0.193	7.4337129885217e-278	CD14M_1	SIRPB2
4.39329882794691e-282	0.288652	0.515	0.315	1.11374518587282e-277	CD14M_1	CD63
2.7175126508169e-281	0.274294	0.683	0.453	6.88916632108593e-277	CD14M_1	ZFAS1
8.27882821923866e-281	0.320158	0.286	0.142	2.09876574185919e-276	CD14M_1	RNF24
4.58273799910691e-280	0.281861	0.423	0.246	1.16176991015359e-275	CD14M_1	SAT2
7.07753200009116e-280	0.294272	0.399	0.228	1.79422513734311e-275	CD14M_1	CTSA
1.12610188128577e-278	0.276428	0.945	0.744	2.85478087924755e-274	CD14M_1	RPS11
3.21439567607477e-277	0.264847	0.959	0.776	8.14881447841715e-273	CD14M_1	RPL13A
9.61005064797486e-277	0.333253	0.393	0.227	2.43624393976811e-272	CD14M_1	SCPEP1
1.75056696592618e-276	0.212792	0.702	0.469	4.43786231531946e-272	CD14M_1	POLR2L
2.72917291956619e-275	0.162774	0.568	0.355	6.91872626839225e-271	CD14M_1	ATG7
5.50644493698083e-274	0.361477	0.36	0.202	1.39593885597401e-269	CD14M_1	PTRHD1
2.78833313139357e-272	0.280444	0.969	0.798	7.06870332139583e-268	CD14M_1	RPS16
1.50974704634972e-271	0.440658	0.244	0.116	3.82735973720118e-267	CD14M_1	MPST
1.60901081239486e-271	0.25888	0.623	0.41	4.0790033105022e-267	CD14M_1	EIF3E
1.06218337739362e-270	0.30654	0.391	0.225	2.69274108003056e-266	CD14M_1	OSCAR
2.97372555670321e-270	0.376013	0.434	0.258	7.53869165879832e-266	CD14M_1	TMEM176A
8.31807802299884e-269	0.153398	0.578	0.362	2.10871595961044e-264	CD14M_1	AGTPBP1
4.22991899340818e-268	0.218602	0.328	0.175	1.07232676401891e-263	CD14M_1	NRGN
6.77151036697566e-268	0.339604	0.363	0.206	1.716645593132e-263	CD14M_1	MRPL33
1.3212091941857e-267	0.118984	0.475	0.28	3.34939742818017e-263	CD14M_1	FNDC3B
2.12303115835586e-267	0.235435	0.651	0.431	5.38209628954794e-263	CD14M_1	EIF3G
5.63103196209026e-267	0.325964	0.239	0.109	1.4275229127095e-262	CD14M_1	DYSF
9.12329888652798e-267	0.269697	0.467	0.282	2.31284750072371e-262	CD14M_1	PLEC
1.39218042509099e-266	0.184708	0.576	0.368	3.52931659564818e-262	CD14M_1	SCAND1
1.71228236082369e-266	0.250011	0.781	0.538	4.34080701292413e-262	CD14M_1	RPL27A
1.94146494283484e-266	-0.485776	0.997	0.987	4.92180777658059e-262	CD14M_1	MALAT1
1.98384799087641e-266	0.132005	0.388	0.215	5.02925304167079e-262	CD14M_1	PARP8
2.81284489580884e-266	0.143987	0.568	0.357	7.13084309536499e-262	CD14M_1	SPIDR
3.26085040979447e-266	0.159947	0.627	0.407	8.26658187386995e-262	CD14M_1	GLRX
3.96223301383677e-266	0.258478	0.503	0.312	1.00446569133776e-261	CD14M_1	CCDC88A
8.87501214206708e-266	0.172338	0.579	0.374	2.24990432813543e-261	CD14M_1	NDUFB9
7.66404390908201e-264	0.166568	0.505	0.311	1.94291177139138e-259	CD14M_1	RABAC1
7.77048615674202e-263	0.238379	0.763	0.524	1.96989594559567e-258	CD14M_1	ENO1
1.40288879705669e-262	0.129606	0.535	0.332	3.55646338941843e-258	CD14M_1	GCA
2.46710332955975e-262	0.253733	0.978	0.829	6.25435365076692e-258	CD14M_1	RPL9
6.6569831802267e-262	0.276392	0.938	0.716	1.68761180601927e-257	CD14M_1	RPL10A
7.80654060535791e-262	0.255247	0.831	0.591	1.97903610886428e-257	CD14M_1	RPL23
1.08282884956045e-261	0.309049	0.39	0.227	2.7450794165207e-257	CD14M_1	CD33
3.13203008700325e-261	0.206912	0.644	0.421	7.94000947356195e-257	CD14M_1	CTSH
2.9839567415255e-260	0.32712	0.379	0.219	7.5646287354413e-256	CD14M_1	RASSF4
1.89153348209589e-259	0.21528	0.549	0.351	4.79522653046129e-255	CD14M_1	EIF3M
2.49994518594415e-259	0.218253	0.45	0.272	6.33761104088701e-255	CD14M_1	CCDC69
2.05515762342453e-258	0.162629	0.528	0.329	5.21003009114352e-254	CD14M_1	RAB11FIP1
6.68799494220289e-258	0.275738	0.445	0.272	1.69547359779785e-253	CD14M_1	TWF2
8.8179026888632e-258	0.178041	0.999	0.961	2.23542651065371e-253	CD14M_1	RPS24
4.00792682739624e-257	0.144669	0.465	0.279	1.01604953001322e-252	CD14M_1	CCNY
8.86404803596508e-257	0.179308	0.415	0.241	2.24712481759751e-252	CD14M_1	BAZ2B
1.05071137591307e-256	0.20255	0.359	0.198	2.66365840907723e-252	CD14M_1	EIF4G3
1.55812105437384e-256	0.279616	0.35	0.196	3.94999268494313e-252	CD14M_1	NCF4
2.46424474219225e-256	0.22097	0.481	0.297	6.24710684593157e-252	CD14M_1	ALKBH7
6.34001463676984e-256	0.120442	0.553	0.347	1.60725711056752e-251	CD14M_1	SLCO3A1
9.09146404840313e-256	0.215629	0.632	0.418	2.30477705091068e-251	CD14M_1	GLIPR1
1.51577890497296e-254	0.154792	0.413	0.24	3.84265110199695e-250	CD14M_1	PHF21A
1.01676758652357e-253	0.14508	0.737	0.505	2.57760750859591e-249	CD14M_1	CD302
1.28275140909236e-253	0.235165	0.734	0.504	3.25190309719003e-249	CD14M_1	FCGRT
4.04221145748925e-253	0.240117	0.457	0.281	1.0247410265881e-248	CD14M_1	UBXN11
7.58636540899797e-253	0.208354	0.754	0.517	1.92321949483508e-248	CD14M_1	CTSB
1.06955558839472e-252	0.334252	0.551	0.358	2.71143037213945e-248	CD14M_1	TMEM176B
2.9920913433723e-252	0.237378	0.328	0.179	7.58525076458311e-248	CD14M_1	PYGL
3.00018789715787e-252	0.270534	0.275	0.139	7.60577633808492e-248	CD14M_1	ACTN1
4.74635562476099e-252	0.101933	0.483	0.291	1.20324861443316e-247	CD14M_1	SORL1
1.67750885534379e-251	0.162611	0.725	0.488	4.25265269918205e-247	CD14M_1	JAML
9.4410228790928e-250	0.457465	0.195	0.084	2.39339371007882e-245	CD14M_1	ALDH1A1
3.49815019369418e-249	0.226849	0.351	0.197	8.86816055603412e-245	CD14M_1	HEBP2
4.43188944928882e-249	0.196749	0.396	0.23	1.12352829428921e-244	CD14M_1	ATXN1
6.8919274591069e-248	0.328245	0.265	0.134	1.74717253015819e-243	CD14M_1	A1BG
3.58229167328233e-247	0.159022	0.422	0.249	9.08146762093803e-243	CD14M_1	SNX29
5.27181523754636e-247	0.234917	0.372	0.214	1.33645788087038e-242	CD14M_1	AGO4
5.72006781483664e-246	0.246182	0.334	0.184	1.45009439173924e-241	CD14M_1	ZNF609
7.6124765102348e-246	0.834796	0.137	0.05	1.92983892010963e-241	CD14M_1	PLA2G7
7.78585465800226e-246	0.232881	0.407	0.242	1.97379201435015e-241	CD14M_1	SULT1A1
2.8459559666588e-244	0.129564	0.468	0.285	7.21478297107672e-240	CD14M_1	GPCPD1
5.79968869783656e-244	0.528309	0.185	0.08	1.47027908178855e-239	CD14M_1	SLC2A9
8.27713946362322e-244	0.393241	0.217	0.101	2.09833762542312e-239	CD14M_1	ASGR2
8.48508584374224e-244	0.234197	0.847	0.61	2.15105411224709e-239	CD14M_1	RPS17
8.55151916027394e-244	0.163423	0.56	0.359	2.16789562232105e-239	CD14M_1	IQGAP2
9.86129147625323e-244	0.203887	0.542	0.35	2.49993600214496e-239	CD14M_1	SF3B5
8.29366946860291e-243	0.240254	0.718	0.493	2.10252814698552e-238	CD14M_1	RPS20
1.06783152259443e-242	0.291848	0.262	0.132	2.70705969292915e-238	CD14M_1	IRS2
2.47059129671781e-242	0.224904	0.986	0.857	6.26319599630932e-238	CD14M_1	UBA52
4.48554957952541e-242	0.216856	0.831	0.599	1.13713167390549e-237	CD14M_1	AP1S2
5.28757050415677e-241	0.24001	0.955	0.76	1.34045199850878e-236	CD14M_1	RPL3
6.55403528079658e-241	0.203132	0.37	0.212	1.66151348403474e-236	CD14M_1	SGK3
8.12434957871797e-241	0.234747	0.353	0.201	2.05960386170079e-236	CD14M_1	LAT2
1.93119877106931e-240	0.246264	0.977	0.834	4.8957820045378e-236	CD14M_1	RPL15
4.42252201752198e-240	0.221312	0.722	0.5	1.121153556662e-235	CD14M_1	SNHG29
4.85656942452348e-240	0.222812	0.44	0.27	1.23118891481095e-235	CD14M_1	TMEM256
7.76732792874707e-240	0.16398	0.91	0.708	1.96909530321667e-235	CD14M_1	DPYD
1.68575189504867e-239	0.283697	0.264	0.135	4.27354962913788e-235	CD14M_1	DGKD
7.00385160078415e-239	0.10834	0.657	0.431	1.77554641931479e-234	CD14M_1	FOS
9.97477664777142e-239	0.270961	0.289	0.154	2.52870562797653e-234	CD14M_1	RIN2
3.9164277549e-237	-1.17012	0.723	0.652	9.92853600144699e-233	CD14M_1	IFITM2
4.16779207833234e-237	0.266801	0.293	0.156	1.05657696977803e-232	CD14M_1	CPNE8
3.64310328722915e-236	0.174655	0.586	0.384	9.23563114345461e-232	CD14M_1	SQSTM1
6.30068577044709e-236	0.201845	0.995	0.921	1.59728684966604e-231	CD14M_1	RPL29
6.88304755212539e-236	0.504635	0.177	0.076	1.74492138493931e-231	CD14M_1	ARMH1
7.75229054393708e-236	0.17106	0.999	0.968	1.96528317579349e-231	CD14M_1	RPL32
1.25929582031857e-235	0.674995	0.115	0.037	3.19244083408961e-231	CD14M_1	F5
1.30571787263509e-235	0.297233	0.277	0.145	3.31012537891721e-231	CD14M_1	SIRPA
3.17716954876914e-235	0.398017	0.219	0.104	8.05444252308465e-231	CD14M_1	TFEC
1.23152746767833e-234	0.125065	0.461	0.283	3.12204528331134e-230	CD14M_1	MAML3
1.35546015595058e-234	0.168438	0.693	0.473	3.43622704135033e-230	CD14M_1	ERP29
4.94501448596385e-234	0.181617	0.996	0.937	1.2536106223367e-229	CD14M_1	RPL35A
1.69421753646995e-233	0.200037	0.357	0.205	4.29501087670496e-229	CD14M_1	LPGAT1
8.02489578683365e-233	0.552163	0.157	0.063	2.0343913309202e-228	CD14M_1	CATSPER1
1.53086580999377e-232	0.172093	0.39	0.23	3.8808979149152e-228	CD14M_1	TOM1
3.21555472547651e-232	0.210525	0.391	0.231	8.15175278455551e-228	CD14M_1	CSF2RA
3.29653513622091e-232	0.207436	0.279	0.146	8.35704622383363e-228	CD14M_1	RELL1
1.91604187100451e-230	0.272574	0.307	0.17	4.85735774718354e-226	CD14M_1	MBOAT7
3.645048768748e-229	0.181124	0.44	0.272	9.24056313365305e-225	CD14M_1	RASSF2
1.7081419050601e-228	0.169898	0.483	0.305	4.33031054351786e-224	CD14M_1	SPTLC2
2.66507019382464e-228	0.220509	0.473	0.303	6.75621944836483e-224	CD14M_1	ATP5IF1
4.92778088015188e-228	0.196361	0.57	0.375	1.2492417309273e-223	CD14M_1	PGAM1
5.02148450455692e-228	0.205042	0.364	0.214	1.27299653675022e-223	CD14M_1	IFI27L2
1.07865325702012e-227	0.1837	0.253	0.127	2.73449387187172e-223	CD14M_1	TREM1
1.08436852360413e-227	0.351329	0.188	0.084	2.74898264418884e-223	CD14M_1	LTB4R
1.61345334469471e-227	0.354981	0.259	0.135	4.09026557413556e-223	CD14M_1	IL13RA1
1.82044561381252e-227	0.135236	0.613	0.405	4.61501167557612e-223	CD14M_1	NDUFB1
2.08685643088564e-227	0.451477	0.195	0.09	5.29038973793817e-223	CD14M_1	SLC44A1
3.34684029735184e-227	0.151364	0.687	0.472	8.48457483781665e-223	CD14M_1	RAB31
6.8714536810174e-227	0.124785	0.484	0.304	1.74198222267472e-222	CD14M_1	SRPK2
1.58331510663024e-226	0.242214	0.92	0.703	4.01386212681832e-222	CD14M_1	RPL4
1.63497107639517e-226	0.159405	0.423	0.258	4.14481517576939e-222	CD14M_1	MAP3K5
1.53473188332528e-223	0.169864	0.501	0.321	3.89069879741793e-219	CD14M_1	NCOA4
3.08889358421516e-223	0.156564	0.768	0.543	7.83065412534385e-219	CD14M_1	CAST
1.35593253718457e-222	0.481866	0.195	0.091	3.4374245750166e-218	CD14M_1	GM2A
7.30163128827271e-222	-5.84463	0.001	0.06	1.85103654789001e-217	CD14M_1	AC104809.2
9.81936434841018e-222	0.11885	0.401	0.238	2.48930705596546e-217	CD14M_1	ARL15
4.77895696346154e-221	0.224934	0.416	0.258	1.21151337980713e-216	CD14M_1	TPP1
1.88843222371021e-220	0.224045	0.388	0.236	4.78736453032775e-216	CD14M_1	SMIM26
2.06671316490359e-220	0.120935	0.827	0.6	5.23932454434709e-216	CD14M_1	PLXDC2
2.20366620373292e-220	0.366375	0.224	0.112	5.58651419308333e-216	CD14M_1	TACC3
3.15564395068058e-220	0.140488	0.545	0.358	7.99987297937033e-216	CD14M_1	RILPL2
4.75966841521476e-220	0.180256	0.412	0.251	1.20662353994109e-215	CD14M_1	TIMP2
2.53423125055313e-219	0.835202	0.144	0.058	6.42452964327725e-215	CD14M_1	CACNA2D4
3.81398162481393e-219	0.358701	0.206	0.099	9.6688248170658e-215	CD14M_1	SLC22A15
3.94791686196433e-219	0.11924	0.378	0.22	1.00083640367658e-214	CD14M_1	ENTPD1
1.9350652378004e-218	0.265245	0.261	0.138	4.9055838843478e-214	CD14M_1	MLXIP
1.91811012612464e-217	0.137089	0.801	0.573	4.86260098073857e-213	CD14M_1	CD44
1.93768623625979e-217	0.222978	0.917	0.708	4.91222837754221e-213	CD14M_1	RPL31
6.52738316678805e-217	0.114704	0.599	0.396	1.65475690661244e-212	CD14M_1	PRAM1
9.02019829427483e-217	0.182739	0.42	0.261	2.28671046958161e-212	CD14M_1	KDELR1
7.63449261320485e-216	0.143248	0.313	0.174	1.93542022237356e-211	CD14M_1	MTMR3
4.7067296659643e-215	0.168794	0.332	0.19	1.19320303761861e-210	CD14M_1	UBR4
1.02073433288304e-214	-1.84488	0.149	0.253	2.58766360729179e-210	CD14M_1	TCF7L2
5.49218890093863e-214	0.12567	0.703	0.479	1.39232480827695e-209	CD14M_1	TNFAIP2
7.04723760633507e-214	0.175139	0.481	0.31	1.786545205582e-209	CD14M_1	FERMT3
7.73808266578854e-214	0.380997	0.194	0.091	1.96168133660405e-209	CD14M_1	ITGA5
1.00918437891513e-213	0.182735	0.997	0.929	2.55838331898774e-209	CD14M_1	RPS23
3.64213972979139e-213	0.180006	0.324	0.185	9.23318842899414e-209	CD14M_1	DENND4A
5.05642800694382e-213	0.17892	0.997	0.939	1.28185506404033e-208	CD14M_1	RPS15
1.30099835847009e-212	0.159453	0.406	0.248	3.29816093855753e-208	CD14M_1	RAB32
1.59838868023853e-212	0.175591	0.261	0.135	4.0520751432727e-208	CD14M_1	CYP27A1
2.68109004714983e-212	0.188322	0.437	0.277	6.79683137852954e-208	CD14M_1	DDX39B
2.99596207506182e-212	0.263533	0.303	0.171	7.59506345648923e-208	CD14M_1	ATP6V1A
8.37190386636757e-212	0.188047	0.326	0.187	2.12236134916284e-207	CD14M_1	ERC1
2.12096487388499e-211	0.182666	0.472	0.306	5.37685805178583e-207	CD14M_1	EIF2S3
3.7244692152123e-211	0.1662	0.637	0.432	9.44190190748469e-207	CD14M_1	APRT
8.87561316202914e-211	0.197498	0.398	0.247	2.25005669270601e-206	CD14M_1	FAAP20
2.07935977976219e-210	0.218897	0.314	0.178	5.27138497767513e-206	CD14M_1	KDM7A
5.38214708384475e-210	0.179466	0.391	0.238	1.36442810722548e-205	CD14M_1	CLEC4A
5.64935140529244e-210	0.119266	0.606	0.406	1.43216707475569e-205	CD14M_1	USP3
8.16318822395004e-210	0.154319	0.999	0.971	2.06944984665357e-205	CD14M_1	RPS28
6.58666938257966e-209	0.144687	0.691	0.473	1.66978655517777e-204	CD14M_1	SSR4
1.33226231120495e-208	0.194137	0.285	0.156	3.37741818513568e-204	CD14M_1	TMEM170B
2.00526357653217e-207	0.149042	0.425	0.265	5.08354369286671e-203	CD14M_1	FRY
2.13764557156189e-207	0.205398	0.303	0.171	5.41914528846654e-203	CD14M_1	CARS2
2.20490476133924e-207	0.400805	0.175	0.079	5.5896540604711e-203	CD14M_1	PCSK5
3.09247766354956e-207	0.218541	0.421	0.267	7.83974012486449e-203	CD14M_1	STX10
3.38930660809821e-207	0.311967	0.266	0.145	8.59223118218978e-203	CD14M_1	CARD19
2.24456426417392e-206	0.221416	0.338	0.199	5.6901948661073e-202	CD14M_1	NFAM1
2.54606440341677e-206	0.186954	0.489	0.32	6.45452786910185e-202	CD14M_1	MAN2B1
3.20067373974491e-206	0.148268	0.34	0.197	8.11402799762732e-202	CD14M_1	AHR
5.48676346437124e-206	0.29073	0.252	0.135	1.39094940585275e-201	CD14M_1	RAB3D
6.11515002090421e-206	0.263866	0.272	0.149	1.55025168179943e-201	CD14M_1	SPECC1
1.27721271640807e-205	0.305029	0.282	0.158	3.23786195736609e-201	CD14M_1	NBPF19
2.06048259620888e-205	0.129904	0.56	0.371	5.22352942964913e-201	CD14M_1	CLEC12A
1.08369124943119e-204	0.156237	0.472	0.306	2.747265686433e-200	CD14M_1	COPS9
1.49979451902642e-204	0.131551	0.517	0.34	3.80212908518388e-200	CD14M_1	CANX
2.51356421020864e-204	0.213264	0.348	0.207	6.37213662929993e-200	CD14M_1	UPP1
3.98310218418637e-204	0.202607	0.445	0.283	1.00975623471309e-199	CD14M_1	RPS10
6.51326474991049e-204	0.124813	0.585	0.394	1.65117774674981e-199	CD14M_1	MCL1
1.05008385664401e-203	0.158538	1	0.981	2.66206758497824e-199	CD14M_1	RPL41
4.0499011205788e-203	0.378789	0.181	0.084	1.02669043307793e-198	CD14M_1	SGMS2
4.44984801485127e-203	0.26876	0.249	0.132	1.12808097024495e-198	CD14M_1	GASK1B
1.25260553890374e-202	0.282071	0.195	0.093	3.17548030167487e-198	CD14M_1	TMEM71
3.83517593064468e-202	0.292693	0.278	0.156	9.72255450177733e-198	CD14M_1	TYK2
2.67813294508506e-201	0.138741	0.303	0.172	6.78933482908514e-197	CD14M_1	ANXA6
4.15993847373445e-201	0.179306	0.303	0.172	1.05458600247642e-196	CD14M_1	APOBR
4.56583638714774e-201	0.14116	0.448	0.286	1.15748518250582e-196	CD14M_1	ATG16L2
3.79046735036902e-200	0.218226	0.326	0.191	9.60921377992049e-196	CD14M_1	HNMT
6.75903284666586e-200	0.200148	0.978	0.838	1.71348241695826e-195	CD14M_1	RPL17
6.76160573025597e-200	0.207935	0.416	0.265	1.71413466867719e-195	CD14M_1	COX7A2L
7.25222706335225e-200	0.218762	0.297	0.17	1.83851208283043e-195	CD14M_1	FLOT1
8.48130000966247e-200	0.280596	0.318	0.188	2.15009436544953e-195	CD14M_1	ACADVL
2.05279734135964e-199	0.149853	0.364	0.219	5.20404654008083e-195	CD14M_1	OGFRL1
5.82685152800805e-199	0.162176	0.838	0.617	1.47716513086532e-194	CD14M_1	MYO1F
5.95240396564928e-199	0.209019	0.309	0.178	1.50899392933175e-194	CD14M_1	IL6R
2.22409816326049e-198	0.207936	0.83	0.603	5.63831125368168e-194	CD14M_1	ALDOA
1.11248525512619e-197	0.235988	0.408	0.26	2.82026137027042e-193	CD14M_1	TOMM20
1.12585289081445e-197	0.168946	0.451	0.29	2.85414966350372e-193	CD14M_1	ZNF385A
1.44911533890712e-197	0.137192	0.366	0.221	3.67365229566343e-193	CD14M_1	LDHB
2.13911220401151e-197	0.16943	0.388	0.241	5.42286334838958e-193	CD14M_1	GLG1
8.57998011065428e-197	0.125712	0.681	0.472	2.17511075785197e-192	CD14M_1	EVI2B
1.78681311276056e-196	0.25422	0.278	0.157	4.52974992215929e-192	CD14M_1	APAF1
3.76196925951643e-196	0.126758	0.349	0.208	9.53696826980011e-192	CD14M_1	MAPK14
9.13194847348586e-196	0.212879	0.278	0.155	2.3150402575134e-191	CD14M_1	FRMD4B
1.0711978017645e-195	0.124239	0.399	0.248	2.71559354725319e-191	CD14M_1	MAP3K2
1.13534463994185e-195	0.124142	0.717	0.498	2.87821219671659e-191	CD14M_1	MTDH
3.28973608398167e-195	-0.240601	1	0.993	8.33980994650193e-191	CD14M_1	ACTB
4.66091200612698e-195	0.199433	0.348	0.211	1.18158780267325e-190	CD14M_1	H2AFJ
7.9716820007509e-195	0.153232	0.59	0.402	2.02090110401036e-190	CD14M_1	COPE
8.21812219932016e-195	0.196243	0.876	0.673	2.08337615874965e-190	CD14M_1	AHNAK
9.26396691954678e-195	-1.41545	0.49	0.509	2.3485082537743e-190	CD14M_1	IFITM3
1.73966620347055e-194	0.11558	0.452	0.289	4.41022779241819e-190	CD14M_1	HSD17B11
1.413364977856e-193	0.251004	0.213	0.108	3.58302155536274e-189	CD14M_1	CR1
2.07100541474698e-193	0.314624	0.216	0.112	5.25020582692507e-189	CD14M_1	ITGAE
5.79742828468797e-193	0.312733	0.26	0.144	1.46970604445125e-188	CD14M_1	CD1D
1.22295618049868e-192	0.175793	0.268	0.149	3.10031621318221e-188	CD14M_1	HEXA
1.74554833242712e-192	0.254385	0.217	0.111	4.42513957753599e-188	CD14M_1	CPD
3.8519395829011e-192	0.299234	0.258	0.143	9.76505203661259e-188	CD14M_1	KCNE3
4.60620288502737e-192	0.158051	0.682	0.474	1.16771849338329e-187	CD14M_1	EDF1
1.24975273691149e-191	0.357727	0.219	0.114	3.16824816334431e-187	CD14M_1	C20orf194
4.97040882668721e-191	0.139393	0.383	0.237	1.26004834165348e-186	CD14M_1	ZDHHC20
8.09853570736325e-191	0.144738	0.391	0.245	2.05305978717366e-186	CD14M_1	HOOK3
2.14239478893092e-190	0.592736	0.138	0.059	5.43118502941877e-186	CD14M_1	FMN1
2.43067681666635e-190	0.216787	0.289	0.166	6.16200879793086e-186	CD14M_1	AGFG1
2.89092002784065e-190	0.436375	0.19	0.094	7.32877136257882e-186	CD14M_1	INPPL1
3.37033638790926e-190	0.102275	0.435	0.276	8.54413977698876e-186	CD14M_1	PTK2B
6.10427581229924e-190	0.35475	0.226	0.118	1.54749496117598e-185	CD14M_1	MT1X
8.94906835112763e-190	0.176952	0.977	0.845	2.26867831769436e-185	CD14M_1	RPLP0
1.41997895705092e-189	0.440577	0.226	0.121	3.59978865401979e-185	CD14M_1	ADAM15
4.69730308098125e-189	0.131359	0.44	0.283	1.19081330405956e-184	CD14M_1	DDT
5.93983037541939e-189	0.153578	0.344	0.208	1.50580639847257e-184	CD14M_1	LRRFIP2
8.75150493965432e-189	0.141783	0.653	0.451	2.21859401725177e-184	CD14M_1	H2AFY
9.22290585903382e-189	0.208521	0.291	0.168	2.33809886432366e-184	CD14M_1	CHP1
1.77697978978103e-188	0.301025	0.3	0.177	4.50482146507388e-184	CD14M_1	ATF4
2.31706392399516e-188	0.228807	0.386	0.245	5.87398875372013e-184	CD14M_1	OXA1L
2.62302489820826e-188	0.170958	0.541	0.361	6.64963041944776e-184	CD14M_1	SLC7A7
3.42520112038803e-188	0.152754	0.481	0.32	8.68322736029569e-184	CD14M_1	SYF2
4.68345353751508e-188	0.167047	0.508	0.338	1.18730230629545e-183	CD14M_1	ATP5F1A
6.61252701885288e-188	0.351519	0.159	0.072	1.67634172454939e-183	CD14M_1	RFLNB
9.0909195239462e-188	0.263757	0.236	0.127	2.3046390085156e-183	CD14M_1	QSOX1
1.12230083193846e-187	-0.910591	0.741	0.657	2.8451448390472e-183	CD14M_1	HLA-DPA1
1.71794459091461e-187	0.194889	0.275	0.155	4.35516133242762e-183	CD14M_1	KCNQ1
5.34414396927921e-187	0.269022	0.344	0.214	1.35479393765197e-182	CD14M_1	IGBP1
9.08493751727587e-187	0.209832	0.354	0.219	2.30312251000461e-182	CD14M_1	ANKRD13D
2.4600830338117e-186	0.14332	0.469	0.307	6.23655649901605e-182	CD14M_1	TNFSF13
1.3003925508612e-185	0.153077	0.456	0.3	3.29662515568823e-181	CD14M_1	RSL1D1
3.73308142800055e-185	0.145534	0.519	0.345	9.46373472812419e-181	CD14M_1	C19orf38
6.83164492964571e-185	0.194715	0.37	0.231	1.73189030611448e-180	CD14M_1	LUC7L3
1.0208026742657e-184	0.143458	0.473	0.311	2.58783685953097e-180	CD14M_1	SRSF3
1.67906639347537e-184	0.160625	0.663	0.459	4.25660121409941e-180	CD14M_1	EIF3F
3.34110029896705e-184	0.220263	0.313	0.188	8.47002336791136e-180	CD14M_1	G6PD
8.42821527959787e-184	0.272039	0.186	0.091	2.13663685553086e-179	CD14M_1	ARHGEF40
8.48913446221386e-184	0.141213	0.197	0.098	2.15208047751584e-179	CD14M_1	TMEM91
1.34459378119036e-183	0.125288	0.578	0.391	3.40867969469568e-179	CD14M_1	EIF3L
3.94909834404626e-183	0.150863	0.624	0.427	1.00113592119917e-178	CD14M_1	RBM3
1.11860581114361e-182	0.101715	0.375	0.232	2.83577759183018e-178	CD14M_1	UBE2D1
1.25047351022653e-182	0.109314	0.707	0.495	3.17007539577527e-178	CD14M_1	CNPY3
1.94751555378512e-182	0.371719	0.197	0.101	4.93714668040065e-178	CD14M_1	MIR4435-2HG
2.93130715003502e-182	0.333497	0.167	0.078	7.43115675605377e-178	CD14M_1	ULK1
6.47525581351455e-182	0.347795	0.267	0.155	1.64154210128407e-177	CD14M_1	TIAM1
9.95338614366969e-182	-10.4358	0	0.047	2.5232829212817e-177	CD14M_1	LYPD2
1.88747425802515e-181	0.219624	0.951	0.763	4.78493599151956e-177	CD14M_1	RPL23A
2.2713946168988e-181	0.15072	0.84	0.618	5.75821249330015e-177	CD14M_1	RNF130
2.29519608531675e-181	0.116365	0.498	0.333	5.8185515958865e-177	CD14M_1	NAA38
9.06282896442537e-181	0.115046	0.42	0.269	2.29751777077148e-176	CD14M_1	HIPK3
3.04795905839519e-180	0.194519	0.327	0.199	7.72688100893764e-176	CD14M_1	RTF1
4.1082881211889e-180	0.103953	0.349	0.213	1.0414921216026e-175	CD14M_1	HELZ
6.21520573882058e-180	0.145122	0.502	0.337	1.57561680684841e-175	CD14M_1	UXT
6.45336489548024e-180	0.156909	0.486	0.325	1.6359925346532e-175	CD14M_1	NDUFS7
2.48772095598686e-179	0.101399	0.442	0.285	6.30662139552228e-175	CD14M_1	MAP3K3
4.36695457549528e-179	0.264474	0.161	0.075	1.10706665443381e-174	CD14M_1	SYTL3
4.51151823664603e-179	0.390936	0.184	0.092	1.14371498817214e-174	CD14M_1	TBC1D2
4.84696194141836e-179	0.197963	0.401	0.256	1.22875332176897e-174	CD14M_1	HK3
1.25343351719823e-178	0.671813	0.094	0.033	3.17757930944924e-174	CD14M_1	MT1F
2.74329870495686e-178	0.403824	0.212	0.113	6.95453654693613e-174	CD14M_1	TMEM173
2.98586333666407e-178	-4.48171	0.004	0.055	7.56946214477709e-174	CD14M_1	CKB
4.09004118375093e-178	0.455656	0.2	0.104	1.0368663404927e-173	CD14M_1	PLXND1
4.64347674359236e-178	0.12869	0.308	0.182	1.1771677892681e-173	CD14M_1	PTPN12
1.16835026855579e-177	0.13771	0.415	0.265	2.96188476581579e-173	CD14M_1	FKBP5
2.38025908860256e-177	0.113819	0.557	0.379	6.03419481551636e-173	CD14M_1	CLTA
4.50717525791497e-177	-3.1181	0.011	0.068	1.14261399963402e-172	CD14M_1	SETBP1
7.31329067004371e-177	0.127809	0.763	0.532	1.85399231776278e-172	CD14M_1	VAMP8
7.88372735816083e-177	0.176368	0.202	0.103	1.99860372256735e-172	CD14M_1	IER3
1.60883977282238e-176	0.498632	0.142	0.063	4.07856970808202e-172	CD14M_1	SLC27A1
2.351173863783e-176	0.473976	0.128	0.054	5.96046086207629e-172	CD14M_1	PLD1
3.29010762248091e-176	0.568712	0.127	0.054	8.34075183375136e-172	CD14M_1	CXXC5
3.40561957720782e-176	0.137978	0.414	0.269	8.63358619017955e-172	CD14M_1	SHKBP1
6.61186459717186e-176	0.201275	0.904	0.699	1.67617379402904e-171	CD14M_1	RPS29
9.03669895209131e-176	0.218867	0.297	0.177	2.29089355134467e-171	CD14M_1	ZFHX3
4.55830371524976e-175	0.187642	0.981	0.847	1.15557557485297e-170	CD14M_1	PFDN5
4.79424508697364e-175	0.156636	0.309	0.185	1.21538907199869e-170	CD14M_1	PDXK
4.9710545887431e-175	0.373807	0.256	0.148	1.26021204879226e-170	CD14M_1	PEPD
1.29061511103533e-174	0.454888	0.153	0.071	3.27183836798566e-170	CD14M_1	AC011472.2
1.56707981750765e-174	0.652445	0.12	0.049	3.97270404536363e-170	CD14M_1	SYNGR1
2.4521922645068e-173	0.112752	0.408	0.264	6.21655260975119e-169	CD14M_1	WDFY2
3.87737182942594e-173	0.141697	0.46	0.306	9.82952532477769e-169	CD14M_1	RNF181
4.18802284533354e-173	0.123064	0.455	0.301	1.0617056715205e-168	CD14M_1	AP2M1
7.26001467400279e-173	0.113051	0.582	0.397	1.84048632000645e-168	CD14M_1	ADA2
8.10301044156828e-173	-0.38039	0.955	0.92	2.05419417704197e-168	CD14M_1	MT-CO2
1.15142346727784e-172	0.180463	0.253	0.143	2.91897363189606e-168	CD14M_1	ANTXR2
1.31689720418372e-172	0.138379	0.69	0.485	3.33846610232616e-168	CD14M_1	EIF3H
1.87316146224584e-172	0.370765	0.148	0.067	4.74865162293942e-168	CD14M_1	GCHFR
3.34386818367752e-172	0.583915	0.142	0.065	8.47704023244088e-168	CD14M_1	TST
1.3188260371356e-171	0.127952	0.735	0.523	3.34335588674245e-167	CD14M_1	ATP6V0B
1.81162447715574e-171	0.278229	0.245	0.139	4.59264921203752e-167	CD14M_1	MAP3K20
2.92717016196771e-171	0.441254	0.127	0.054	7.42066907760433e-167	CD14M_1	RFX2
1.25017581013504e-170	-1.699	0.091	0.181	3.16932069627334e-166	CD14M_1	EVL
1.77341817907738e-170	0.114666	0.525	0.358	4.49579242577907e-166	CD14M_1	HADHA
2.1135494630713e-170	-2.54006	0.021	0.085	5.35805924383205e-166	CD14M_1	CD79B
8.01568119070376e-170	0.180561	0.308	0.187	2.03205533865531e-165	CD14M_1	ZDHHC7
1.87216799215363e-169	0.13186	0.376	0.24	4.74613307690866e-165	CD14M_1	CAPN2
1.71322444730866e-168	0.106507	0.645	0.447	4.34319529637218e-164	CD14M_1	TRIR
2.06884541812706e-168	0.123761	0.41	0.267	5.24473001949391e-164	CD14M_1	EIF4EBP1
2.10025752363113e-168	0.520571	0.103	0.039	5.32436284815728e-164	CD14M_1	WLS
3.48963639442865e-168	0.157148	0.376	0.241	8.84657722351608e-164	CD14M_1	NDUFS8
3.54335752286551e-168	0.180469	0.198	0.103	8.98276565621635e-164	CD14M_1	EIF4E3
9.81080713138724e-168	0.136304	0.5	0.338	2.48713771587798e-163	CD14M_1	CAPNS1
1.41158096948871e-167	0.255077	0.275	0.163	3.57849891575083e-163	CD14M_1	GAA
2.07259549387307e-167	0.111598	0.503	0.341	5.25423683651761e-163	CD14M_1	NSA2
2.64858721648073e-167	0.128954	0.341	0.213	6.7144334525003e-163	CD14M_1	HIST1H4C
3.02162443575566e-167	0.111956	0.315	0.191	7.66012010708417e-163	CD14M_1	TNRC18
3.17363704933053e-167	0.168804	0.304	0.184	8.04548728375784e-163	CD14M_1	NORAD
5.17046030045099e-167	0.162082	0.286	0.17	1.31076339076733e-162	CD14M_1	CCDC88B
7.43346621341305e-167	0.274162	0.249	0.143	1.88445801976234e-162	CD14M_1	MYO15B
1.03098642416741e-166	0.169559	0.996	0.93	2.6136536839068e-162	CD14M_1	RPL18A
1.88593181585445e-166	0.126399	0.542	0.37	4.78102574637263e-162	CD14M_1	UBXN1
3.09728761401185e-166	0.107142	0.56	0.384	7.85193383028144e-162	CD14M_1	EID1
4.4289280669578e-166	0.147437	0.999	0.96	1.12277755425447e-161	CD14M_1	RPL19
1.01358023918567e-165	0.135645	0.264	0.152	2.56952726435959e-161	CD14M_1	USP48
1.42313590365804e-165	0.105068	0.315	0.19	3.60779182936351e-161	CD14M_1	IRF2BP2
2.34921364217736e-165	0.148584	0.225	0.123	5.95549150428383e-161	CD14M_1	HDAC4
1.70320822254312e-164	0.361661	0.194	0.103	4.31780316496907e-160	CD14M_1	NPEPL1
2.09164354725373e-164	0.502941	0.118	0.049	5.30252555664293e-160	CD14M_1	TRG-AS1
3.08314978538217e-164	0.202229	0.276	0.163	7.81609302092234e-160	CD14M_1	DOK3
1.87158125569354e-163	0.127256	0.582	0.401	4.7446456413087e-159	CD14M_1	CTSZ
2.11477042778002e-163	0.151921	0.251	0.144	5.36115451146512e-159	CD14M_1	LBR
2.15930259524861e-163	0.299793	0.26	0.154	5.47404800921475e-159	CD14M_1	PABPN1
2.18294851565865e-163	0.286568	0.186	0.096	5.53399278204625e-159	CD14M_1	CTNNBIP1
3.49576481322721e-163	0.162173	0.403	0.267	8.86211337801231e-159	CD14M_1	TUFM
1.14981399337153e-162	0.158828	0.235	0.131	2.91489345459617e-158	CD14M_1	FCGR1A
2.69454097804672e-162	0.269348	0.153	0.072	6.83093083344624e-158	CD14M_1	ACAP1
9.42507528496244e-162	0.406534	0.155	0.075	2.38935083549083e-157	CD14M_1	PDLIM7
9.66612606297621e-162	0.30555	0.206	0.112	2.4504596182251e-157	CD14M_1	IMPA2
1.39230693159952e-161	0.162314	0.975	0.834	3.52963730229794e-157	CD14M_1	COX4I1
1.85181729655131e-161	0.130348	0.39	0.255	4.69454202848723e-157	CD14M_1	PRKCD
2.53799712096657e-161	0.208251	0.959	0.789	6.43407650136234e-157	CD14M_1	RPL36A
5.41432230704701e-161	0.48269	0.093	0.034	1.37258484805949e-156	CD14M_1	PADI2
1.2657480239346e-160	0.145905	0.383	0.251	3.2087978154766e-156	CD14M_1	PRDX6
1.35266071923686e-160	0.22461	0.264	0.156	3.42913018933738e-156	CD14M_1	CNIH1
2.33235312112272e-160	0.109066	0.469	0.317	5.9127483973582e-156	CD14M_1	EIF4B
2.74514742884739e-160	0.328154	0.164	0.081	6.95922324687102e-156	CD14M_1	CRTC3
4.24928447180529e-160	0.156789	0.995	0.898	1.07723610644736e-155	CD14M_1	RPS27
5.59578977373689e-160	0.128683	0.343	0.217	1.41858866554004e-155	CD14M_1	LY96
5.67535525648539e-160	0.128642	0.4	0.262	1.43875931107161e-155	CD14M_1	ATP6V1B2
8.51937944693489e-160	0.290809	0.24	0.138	2.15974788359246e-155	CD14M_1	TPGS1
1.34138027965609e-159	0.153873	0.287	0.173	3.40053314695616e-155	CD14M_1	SDCCAG8
2.95528798065615e-159	0.114571	0.431	0.289	7.4919505597614e-155	CD14M_1	POLR1D
6.00647212155562e-159	0.143817	0.323	0.202	1.52270074753557e-154	CD14M_1	ARHGAP9
8.49084647262575e-159	0.120024	0.4	0.263	2.15251448927535e-154	CD14M_1	PSMA1
2.03084054092769e-158	0.132417	0.83	0.609	5.14838385530578e-154	CD14M_1	TOMM7
2.36133772984691e-158	0.173724	0.29	0.176	5.98622727893491e-154	CD14M_1	TRABD
3.57056445424615e-158	0.327829	0.193	0.103	9.05173794795942e-154	CD14M_1	MTX1
3.75430804513558e-158	0.121109	0.352	0.225	9.51754632522321e-154	CD14M_1	COPA
4.33721958999778e-158	0.175996	0.871	0.655	1.09952853826034e-153	CD14M_1	EEF2
4.45829823577621e-158	0.339851	0.163	0.08	1.13022318575163e-153	CD14M_1	VSTM1
7.71605894900017e-158	0.513214	0.143	0.068	1.95609810416103e-153	CD14M_1	OAF
2.57166199049205e-157	0.165292	0.989	0.879	6.5194203120964e-153	CD14M_1	RPL21
3.3215413955306e-157	0.200141	0.235	0.133	8.42043959180962e-153	CD14M_1	SOAT1
3.55115848309534e-157	0.107275	0.366	0.235	9.00254187049499e-153	CD14M_1	FAM120A
1.62817101608053e-156	0.229998	0.262	0.156	4.12757634286575e-152	CD14M_1	PLIN3
2.31786559910467e-156	0.149591	0.957	0.786	5.87602108029025e-152	CD14M_1	RPL7
6.23709886587794e-156	0.100595	0.378	0.245	1.58116693348872e-151	CD14M_1	YY1
1.73098908283381e-155	0.192032	0.28	0.17	4.388230423892e-151	CD14M_1	JOSD2
3.24232711064627e-155	0.219701	0.249	0.146	8.21962345819935e-151	CD14M_1	NFIC
3.9062127634716e-155	0.198217	0.266	0.159	9.90263997667685e-151	CD14M_1	SNHG7
6.3171269571759e-155	0.161284	0.35	0.226	1.60145485491366e-150	CD14M_1	PRDX3
6.41623980783489e-155	0.12999	0.139	0.064	1.62658095368422e-150	CD14M_1	MARC1
6.5187387569871e-155	0.105889	0.763	0.551	1.6525654622838e-150	CD14M_1	TRAPPC5
5.16899150286653e-154	-1.43222	0.193	0.28	1.31039103589169e-149	CD14M_1	MTSS1
6.08088169300607e-154	0.263188	0.201	0.11	1.54156431799397e-149	CD14M_1	MGST2
6.39506725182495e-154	0.127251	0.412	0.271	1.62121349901014e-149	CD14M_1	PID1
7.52944972382058e-154	0.227911	0.303	0.19	1.90879079948576e-149	CD14M_1	SNRPF
4.87324027989408e-153	0.187346	0.234	0.134	1.23541514335595e-148	CD14M_1	OTULINL
1.28682342252947e-152	0.13369	0.379	0.25	3.26222605845446e-148	CD14M_1	LRPAP1
3.46601435124387e-152	0.109264	0.434	0.292	8.78669298183833e-148	CD14M_1	ATP6AP2
5.64967450812368e-152	0.197928	0.25	0.147	1.43224898455444e-147	CD14M_1	TBC1D9
7.20877051354957e-152	0.539494	0.101	0.04	1.82749541288995e-147	CD14M_1	WDR49
8.81093648558415e-152	0.259061	0.258	0.154	2.23366050846044e-147	CD14M_1	RPS6KA4
1.27425341689692e-151	0.16717	0.965	0.795	3.23035983717538e-147	CD14M_1	ACTG1
1.30524433391424e-151	0.178146	0.982	0.848	3.308924910906e-147	CD14M_1	RACK1
1.70751617536089e-151	0.294067	0.127	0.057	4.3287242561574e-147	CD14M_1	SLC40A1
6.20358761050202e-151	0.443197	0.128	0.058	1.57267149513837e-146	CD14M_1	FURIN
6.60194446903629e-151	0.247538	0.251	0.15	1.67365894234539e-146	CD14M_1	EMC10
1.16430056699166e-150	0.224564	0.2	0.109	2.95161836738057e-146	CD14M_1	ABHD5
1.24106253167592e-150	0.865289	0.08	0.028	3.14621762405161e-146	CD14M_1	SHROOM1
1.9185834350767e-150	0.348754	0.149	0.072	4.86380086626295e-146	CD14M_1	NISCH
2.76335944266554e-150	0.555486	0.122	0.054	7.0053925231014e-146	CD14M_1	NIBAN2
4.81008328102741e-150	0.106609	0.295	0.181	1.21940421257326e-145	CD14M_1	LDLRAD4
6.80790716793902e-150	0.122076	0.265	0.157	1.72587254614422e-145	CD14M_1	PRRC2B
8.3425389069015e-150	0.222126	0.311	0.199	2.1149170382886e-145	CD14M_1	FBL
1.98986208775093e-149	0.125562	0.325	0.206	5.04449937865737e-145	CD14M_1	SQOR
2.24420137001123e-149	0.183786	0.29	0.179	5.68927489311547e-145	CD14M_1	DHRS4
2.40275437586148e-149	0.416017	0.177	0.094	6.09122261824643e-145	CD14M_1	HAUS4
4.64887036058745e-149	0.441374	0.114	0.049	1.17853512511253e-144	CD14M_1	HOMER3
5.25135385130417e-149	0.143245	0.242	0.14	1.33127071484412e-144	CD14M_1	TNS3
9.30981103362036e-149	0.112249	0.735	0.519	2.3601301951331e-144	CD14M_1	HNRNPA1
1.76041129415492e-148	0.321896	0.202	0.113	4.46281867181215e-144	CD14M_1	PRNP
4.73162032547849e-148	0.145228	0.37	0.243	1.19951306871205e-143	CD14M_1	MGST3
9.3017851943119e-148	0.164648	0.207	0.115	2.35809556461001e-143	CD14M_1	IPCEF1
1.32582254997752e-147	0.12419	0.369	0.244	3.361092746448e-143	CD14M_1	DPP7
2.47684097821471e-147	0.148244	0.328	0.21	6.27903956387211e-143	CD14M_1	LACTB
2.63515604916881e-147	0.114628	0.272	0.165	6.68038410024785e-143	CD14M_1	LAMP2
2.82860536434791e-147	0.14888	0.865	0.661	7.17079745915838e-143	CD14M_1	PCBP2
3.1789003831761e-147	0.145368	0.245	0.144	8.05883036138974e-143	CD14M_1	KCTD20
4.12661825820393e-147	0.276695	0.246	0.147	1.04613899463728e-142	CD14M_1	ROGDI
4.96875208223169e-147	0.103438	0.731	0.516	1.25962834036656e-142	CD14M_1	CFP
6.84928607678773e-147	0.249337	0.152	0.075	1.73636251332646e-142	CD14M_1	FAM157C
1.43044540838648e-146	0.529292	0.101	0.041	3.62632215480056e-142	CD14M_1	EPDR1
2.62504233951899e-146	0.17423	0.201	0.111	6.6547448349146e-142	CD14M_1	MINK1
2.64232961877803e-146	0.338879	0.143	0.069	6.69856981656418e-142	CD14M_1	HK2
3.50667030548918e-146	0.16911	0.352	0.229	8.88975989144562e-142	CD14M_1	YBX3
5.08620941544114e-146	0.149059	0.301	0.19	1.28940494890848e-141	CD14M_1	RNF166
5.86094358020869e-146	0.12417	0.267	0.161	1.48580780701871e-141	CD14M_1	HIPK2
6.06435487743519e-146	0.105164	0.381	0.253	1.53737460497859e-141	CD14M_1	UFC1
7.01987159812844e-146	0.188665	0.209	0.117	1.77960764884154e-141	CD14M_1	FOSL2
1.28421867947047e-145	0.111511	0.321	0.204	3.25562277432558e-141	CD14M_1	MAP2K1
1.45770833615297e-145	0.184387	0.213	0.12	3.69543640298139e-141	CD14M_1	UBE4B
6.48616834327764e-145	0.144273	0.398	0.267	1.64430853670431e-140	CD14M_1	NBPF14
6.78340474938204e-145	0.247269	0.245	0.147	1.71966093801584e-140	CD14M_1	RABL6
9.3358178793758e-145	0.166546	0.275	0.169	2.36672319060056e-140	CD14M_1	DPM3
2.60937888747767e-144	-5.70315	0.001	0.041	6.61503641764463e-140	CD14M_1	VMO1
2.95811708386988e-144	0.127191	0.995	0.93	7.49912261931854e-140	CD14M_1	RPLP2
1.27148854338916e-143	0.191995	0.214	0.121	3.22335060634586e-139	CD14M_1	PER1
1.85129237185893e-143	0.130412	0.264	0.16	4.69321129189958e-139	CD14M_1	TSEN34
2.17648526629845e-143	0.167568	0.984	0.859	5.5176077985932e-139	CD14M_1	EIF1
2.20048841163568e-143	0.156993	0.247	0.147	5.57845817233762e-139	CD14M_1	ANAPC15
1.71872387270454e-142	0.109782	0.757	0.547	4.35713688969329e-138	CD14M_1	ZYX
2.05751092682171e-142	0.375247	0.164	0.086	5.21599595058571e-138	CD14M_1	CCDC159
3.56281892501182e-142	0.175352	0.22	0.126	9.03210225679748e-138	CD14M_1	MAPK8IP3
3.68650657380017e-142	0.249105	0.222	0.129	9.34566281524082e-138	CD14M_1	SEMA4A
3.87562078162584e-142	0.150872	0.231	0.134	9.82508624349966e-138	CD14M_1	SHTN1
4.32357850501539e-142	0.367792	0.153	0.077	1.09607038680645e-137	CD14M_1	LINC00963
9.78100596627162e-142	0.15717	0.32	0.207	2.47958282250952e-137	CD14M_1	PSMB4
2.06824419457842e-141	0.366806	0.135	0.065	5.24320585767576e-137	CD14M_1	PLAAT3
1.16056614441561e-140	0.105192	0.267	0.163	2.94215123270802e-136	CD14M_1	KDM3B
1.6006067417719e-140	0.157934	0.364	0.243	4.05769815106595e-136	CD14M_1	POLR2E
3.24696284600898e-140	0.495407	0.137	0.068	8.23137551091737e-136	CD14M_1	ASRGL1
4.16379328077751e-140	0.106418	0.777	0.567	1.05556323460991e-135	CD14M_1	ZFP36L2
5.31551280309372e-140	0.104132	0.311	0.197	1.34753565071229e-135	CD14M_1	ATAD2B
1.64716503416079e-139	0.184126	0.974	0.829	4.17572807810103e-135	CD14M_1	HLA-A
2.01567837231265e-139	0.155924	0.927	0.731	5.10994624164981e-135	CD14M_1	ATP5MG
3.22679605464238e-139	0.143998	0.32	0.207	8.1802506781239e-135	CD14M_1	DNAJC7
3.28420022527292e-139	0.143479	0.296	0.186	8.32577599108937e-135	CD14M_1	TIMM13
5.96153600243602e-139	0.14115	0.331	0.215	1.51130899197756e-134	CD14M_1	GIMAP1
8.95408486068435e-139	0.191417	0.228	0.133	2.26995005303209e-134	CD14M_1	CYFIP1
1.61459209921052e-138	0.12606	0.325	0.211	4.0931524307086e-134	CD14M_1	RNPEPL1
4.39407545617807e-138	-4.56774	0.006	0.048	1.1139420688957e-133	CD14M_1	C1QA
1.2504026888314e-137	0.153943	0.986	0.877	3.16989585645647e-133	CD14M_1	RPL36
2.46100785207582e-137	-2.50411	0.014	0.064	6.23890100579742e-133	CD14M_1	NEURL1
2.97855292220914e-137	0.149945	0.223	0.13	7.55092951309239e-133	CD14M_1	HCFC1R1
8.47600673617625e-137	0.28511	0.106	0.046	2.14875246768804e-132	CD14M_1	CLEC4D
1.45442767389127e-136	0.135647	0.271	0.168	3.68711959608175e-132	CD14M_1	PARL
1.70560582979543e-136	0.186808	0.26	0.161	4.3238813391144e-132	CD14M_1	MPG
2.8611102963767e-136	0.154956	0.246	0.149	7.25320071234458e-132	CD14M_1	MAN1A2
3.42276362605595e-136	0.166654	0.214	0.123	8.67704806841443e-132	CD14M_1	SGMS1
1.57999070828491e-135	0.150999	0.278	0.175	4.00543444457308e-131	CD14M_1	PRKCSH
1.70511437413254e-135	0.194745	0.284	0.18	4.3226354498634e-131	CD14M_1	OSTC
2.09790670378506e-135	0.157671	0.232	0.137	5.3184032847655e-131	CD14M_1	SLMAP
2.28518155514267e-135	0.182757	0.33	0.218	5.79316376044219e-131	CD14M_1	EIF3I
2.67159070665971e-135	0.268138	0.18	0.098	6.77274960045303e-131	CD14M_1	MLKL
3.93133758909239e-135	0.106534	0.273	0.169	9.96633392210813e-131	CD14M_1	CAMTA1
6.15520791396212e-135	0.256867	0.215	0.126	1.56040675826854e-130	CD14M_1	CHKB
1.70856945545108e-134	0.203082	0.246	0.151	4.33139442651404e-130	CD14M_1	EIF2A
1.97874596873529e-134	0.653547	0.147	0.076	5.01631890534083e-130	CD14M_1	TSPAN4
2.88891656737309e-134	0.187804	0.162	0.085	7.32369238994753e-130	CD14M_1	DGCR2
3.5971681947184e-134	0.189187	0.249	0.153	9.11918109043062e-130	CD14M_1	VPS51
4.62599989676611e-134	0.119329	0.302	0.194	1.17273723382918e-129	CD14M_1	HADHB
5.62989331350068e-134	0.385156	0.143	0.073	1.42723425390556e-129	CD14M_1	PLPPR2
8.83716276126301e-134	0.256874	0.187	0.104	2.24030913160778e-129	CD14M_1	ARHGEF10L
2.00803140426266e-133	0.104013	0.204	0.116	5.09056041294628e-129	CD14M_1	ZNF516
2.32374552496685e-133	0.122809	0.241	0.145	5.89092728034346e-129	CD14M_1	AP3S2
2.89949488832108e-133	0.116369	0.407	0.279	7.35050949138278e-129	CD14M_1	NDUFS6
3.25915286432497e-133	0.201778	0.172	0.092	8.26227842635023e-129	CD14M_1	GPD2
9.59366350542247e-133	0.137463	0.179	0.098	2.43208963525965e-128	CD14M_1	ATP6V0A1
1.08433096111814e-132	-0.58712	0.948	0.803	2.7488874195306e-128	CD14M_1	LST1
1.35228329556851e-132	0.118113	0.809	0.593	3.42817338259572e-128	CD14M_1	GNAI2
4.06486419543237e-132	0.338992	0.133	0.065	1.03048372218406e-127	CD14M_1	AGPAT4
4.22340538029492e-132	-2.56756	0.014	0.062	1.07067549795856e-127	CD14M_1	ADA
2.92660430022465e-131	0.134943	0.209	0.121	7.4192345614995e-127	CD14M_1	PHC2
4.83149399274235e-131	0.139395	0.282	0.178	1.22483204210011e-126	CD14M_1	CLIP1
5.48969655494262e-131	0.624465	0.096	0.041	1.3916929736435e-126	CD14M_1	PTK2
6.05659927638616e-131	0.591995	0.112	0.051	1.53540848255666e-126	CD14M_1	IDH1
6.95184946414012e-131	0.120576	1	0.975	1.76236335765416e-126	CD14M_1	EEF1A1
7.42770133847355e-131	0.124329	0.313	0.204	1.88299656631643e-126	CD14M_1	NONO
8.4911074194444e-131	0.142749	0.282	0.178	2.15258064190335e-126	CD14M_1	TUBGCP2
1.31019196433195e-130	0.20517	0.201	0.115	3.32146764877792e-126	CD14M_1	IL27RA
1.42040690691759e-130	0.251413	0.245	0.151	3.60087354972678e-126	CD14M_1	YIF1B
3.45689226408675e-130	0.261724	0.153	0.08	8.76356757868631e-126	CD14M_1	ACOX1
3.67889297380054e-130	0.277413	0.241	0.149	9.32636157788174e-126	CD14M_1	QARS
8.09575975873763e-130	0.110058	0.395	0.271	2.05235605643758e-125	CD14M_1	PHB2
1.00424763534798e-129	0.540661	0.104	0.046	2.54586818037067e-125	CD14M_1	SGSH
1.26185990787272e-129	0.143298	0.319	0.21	3.19894105244813e-125	CD14M_1	C1orf43
1.36266637204314e-129	0.125643	0.998	0.952	3.45449551976655e-125	CD14M_1	RPS15A
1.65849341713989e-129	0.112336	0.325	0.213	4.20444666179134e-125	CD14M_1	HDLBP
1.83754327385243e-129	0.168134	0.255	0.159	4.6583559535433e-125	CD14M_1	LTBR
1.91153885109738e-129	0.279357	0.153	0.08	4.84594214141696e-125	CD14M_1	MSL1
2.88481040030972e-129	0.178935	0.235	0.143	7.31328284582516e-125	CD14M_1	LILRA6
7.32220583988886e-129	0.324623	0.13	0.064	1.85625240247022e-124	CD14M_1	SFXN5
8.24653471032392e-129	0.231802	0.193	0.111	2.09057901441422e-124	CD14M_1	PXK
1.10894410734794e-128	0.189477	0.226	0.136	2.81128420653776e-124	CD14M_1	NARS
1.13305374227819e-128	0.176881	0.209	0.122	2.87240454204944e-124	CD14M_1	ZMYM4
4.99971318695149e-128	0.12851	0.269	0.169	1.26747729002407e-123	CD14M_1	CHD4
5.14667513458663e-128	0.366732	0.118	0.056	1.30473361336906e-123	CD14M_1	ASPH
5.72642069463562e-128	0.108863	0.237	0.144	1.45170491029708e-123	CD14M_1	FBXO9
5.83187319472554e-128	0.380735	0.106	0.047	1.47843817359487e-123	CD14M_1	THBS1
8.88250280971703e-128	0.284162	0.174	0.096	2.25180328729136e-123	CD14M_1	AC096667.1
1.18796500449012e-127	0.11333	0.243	0.148	3.01161008288289e-123	CD14M_1	RBM5
1.87571481936187e-127	0.130244	0.279	0.177	4.75512463856428e-123	CD14M_1	CDV3
2.08614449593993e-127	0.236665	0.187	0.106	5.28858491165732e-123	CD14M_1	MBD4
1.16011602619433e-126	-4.55972	0.002	0.037	2.94101013800524e-122	CD14M_1	AC020651.2
2.07349131574271e-126	0.170557	0.245	0.152	5.25650783453933e-122	CD14M_1	CORO1C
2.58510789693237e-126	0.346977	0.173	0.097	6.55350702951325e-122	CD14M_1	AKR1B1
3.19040234228635e-126	0.211232	0.217	0.13	8.08798897793012e-122	CD14M_1	PPM1M
4.25947104572441e-126	0.118964	0.291	0.186	1.07981850480159e-121	CD14M_1	OSBPL11
4.70852458684168e-126	0.297951	0.123	0.059	1.19365806801023e-121	CD14M_1	AL163541.1
5.08494824599022e-126	0.100483	0.273	0.173	1.28908522984098e-121	CD14M_1	AP1B1
5.18355530441985e-126	0.111026	0.295	0.191	1.31408310522348e-121	CD14M_1	SCNM1
4.66998624179379e-125	0.319356	0.16	0.087	1.18388821215714e-120	CD14M_1	DUSP3
5.11159184686627e-125	0.101836	0.16	0.085	1.29583964909907e-120	CD14M_1	TNFSF8
7.85518813436528e-125	0.236652	0.183	0.104	1.99136874394294e-120	CD14M_1	HSD17B4
8.21184380837299e-125	-2.1033	0.025	0.079	2.08178452386064e-120	CD14M_1	CTSL
1.93834526361196e-124	0.145248	0.856	0.636	4.91389907778267e-120	CD14M_1	COX7C
4.85503430782372e-124	0.184332	0.187	0.106	1.23079974737639e-119	CD14M_1	TNFSF12
4.87703614733729e-124	0.110887	0.999	0.968	1.23637743371148e-119	CD14M_1	RPL34
5.59805071334106e-124	0.34522	0.157	0.085	1.41916183633909e-119	CD14M_1	BX284668.5
6.1314053155669e-124	0.367194	0.117	0.056	1.55437256154936e-119	CD14M_1	TRPM2
9.58761962371169e-124	0.137083	0.272	0.174	2.43055745080715e-119	CD14M_1	ZMAT2
1.36968263404959e-123	0.22615	0.131	0.065	3.47228244557911e-119	CD14M_1	LINC01001
1.40158314283276e-123	0.201182	0.201	0.118	3.55315342539534e-119	CD14M_1	NQO2
2.01557603026453e-123	0.366549	0.141	0.073	5.10968679432362e-119	CD14M_1	ELK3
2.20364246164274e-123	0.437511	0.154	0.084	5.58645400451052e-119	CD14M_1	MTMR11
3.81457311830849e-123	0.112374	0.263	0.166	9.67032431222386e-119	CD14M_1	OLA1
8.25216739396765e-123	-1.77574	0.054	0.118	2.09200695604474e-118	CD14M_1	INSIG1
9.51698644164192e-123	0.155289	0.242	0.151	2.41265123282064e-118	CD14M_1	CNPY2
1.47608499131123e-122	0.186834	0.173	0.096	3.7420230614731e-118	CD14M_1	NPLOC4
5.65524054453023e-122	0.126271	0.29	0.19	1.43366003044386e-117	CD14M_1	ATP6AP1
1.13292356028486e-121	0.209086	0.154	0.083	2.87207451767814e-117	CD14M_1	METTL22
1.15381423601887e-121	0.177176	0.239	0.149	2.92503446973144e-117	CD14M_1	SIGLEC9
1.26693211366186e-121	0.212143	0.139	0.072	3.21179960134418e-117	CD14M_1	HDAC7
4.30580170507244e-121	0.244288	0.122	0.059	1.09156379025291e-116	CD14M_1	LIN7A
8.51702188535295e-121	0.207158	0.146	0.077	2.15915021815583e-116	CD14M_1	FAM13A
8.87192676723483e-121	0.250771	0.206	0.123	2.2491221547617e-116	CD14M_1	MAZ
2.62536315380099e-120	0.495356	0.089	0.038	6.65555813120088e-116	CD14M_1	AL161785.1
2.78146994510049e-120	0.420068	0.084	0.035	7.05130445782425e-116	CD14M_1	AC087741.1
3.45666870565358e-120	-0.302821	0.963	0.936	8.76300083570239e-116	CD14M_1	MT-CO1
4.16036463669873e-120	0.120325	0.264	0.168	1.0546940390495e-115	CD14M_1	CREB1
4.5824902385558e-120	0.194183	0.225	0.138	1.16170710037628e-115	CD14M_1	METTL7A
4.94045498152828e-120	0.107365	0.281	0.182	1.25245474236723e-115	CD14M_1	CDK5RAP3
5.04550452262145e-120	0.219788	0.196	0.115	1.27908585152976e-115	CD14M_1	MAN2C1
5.65794462584821e-120	0.12126	0.221	0.134	1.43434554209878e-115	CD14M_1	TMEM183A
5.92249007775637e-120	0.171282	0.257	0.163	1.50141045961202e-115	CD14M_1	SPINT2
6.04574919351942e-120	0.141155	0.183	0.105	1.53265787804911e-115	CD14M_1	SLC36A4
6.53843648505865e-120	0.14623	0.209	0.125	1.65755903332722e-115	CD14M_1	USP22
1.58110719071847e-119	0.110003	0.296	0.195	4.00826483919039e-115	CD14M_1	ETFB
2.10066602609786e-119	0.113817	0.276	0.178	5.32539844276069e-115	CD14M_1	PPP1R9B
2.24983184699247e-119	0.141353	0.191	0.11	5.70354871531062e-115	CD14M_1	DEF8
5.19266560588606e-119	0.28216	0.117	0.057	1.31639265774818e-114	CD14M_1	CCDC149
6.57641277533673e-119	0.150032	0.18	0.102	1.66718640267561e-114	CD14M_1	KDM6B
7.64649938307935e-119	0.158198	0.23	0.142	1.93846405860445e-114	CD14M_1	ATXN2L
8.12894999171851e-119	0.657941	0.073	0.028	2.06077011240056e-114	CD14M_1	EPHX1
1.25532663001754e-118	0.281827	0.137	0.071	3.18237853975747e-114	CD14M_1	CD300LB
1.92130235295356e-118	0.127646	0.262	0.168	4.87069359497257e-114	CD14M_1	CTDNEP1
2.28134352614452e-118	0.103483	0.282	0.183	5.78343397312897e-114	CD14M_1	APEX1
3.39748628086181e-118	-1.84095	0.03	0.084	8.61296747061277e-114	CD14M_1	BATF3
3.9827214549959e-118	0.363336	0.114	0.055	1.00965971605601e-113	CD14M_1	NRM
5.41684374564554e-118	0.271995	0.131	0.067	1.3732240579586e-113	CD14M_1	RIT1
5.43561799996794e-118	0.120057	0.18	0.102	1.37798351917187e-113	CD14M_1	ADAM8
6.56542518876468e-118	-2.10465	0.024	0.074	1.66440093960373e-113	CD14M_1	NR4A1
6.59875669918584e-118	0.156631	0.243	0.153	1.6728508108106e-113	CD14M_1	NIPSNAP2
3.54447730145964e-117	-0.357603	0.96	0.843	8.98560440693033e-113	CD14M_1	FCER1G
7.19021749888729e-117	0.765286	0.057	0.018	1.82279203814292e-112	CD14M_1	TDRD9
9.83899263556842e-117	0.123162	0.172	0.097	2.49428302304295e-112	CD14M_1	NHSL2
1.43291488850822e-116	-1.77939	0.042	0.1	3.63258253385718e-112	CD14M_1	IFIT3
1.51311713957047e-116	-2.39567	0.033	0.088	3.8359032605251e-112	CD14M_1	PLD4
2.23434807984327e-116	0.369453	0.103	0.048	5.66429581721069e-112	CD14M_1	LINC02785
2.23439245168518e-116	0.275609	0.171	0.098	5.6644083042671e-112	CD14M_1	HDHD5
2.49243932299872e-116	0.109626	0.336	0.229	6.31858292773405e-112	CD14M_1	PSMD7
3.59857204746344e-116	-1.00675	0.363	0.41	9.12273999752457e-112	CD14M_1	LY6E
6.65068939364908e-116	0.161651	0.946	0.763	1.68601626818398e-111	CD14M_1	RPL35
1.16206304997029e-115	0.102242	0.22	0.133	2.94594603797969e-111	CD14M_1	OSBPL9
1.26020629951677e-115	0.153018	0.223	0.137	3.19474898990496e-111	CD14M_1	CTDSP2
1.37714575987477e-115	0.219101	0.122	0.06	3.49120221585853e-111	CD14M_1	TSHZ3
2.84548048348604e-115	0.129807	0.126	0.064	7.21357757368546e-111	CD14M_1	EEPD1
3.35483995485851e-115	0.249157	0.177	0.101	8.50485476956181e-111	CD14M_1	ZSCAN16-AS1
3.64531453859904e-115	0.220912	0.172	0.097	9.24123688680243e-111	CD14M_1	BCL3
1.44571611254828e-114	0.224071	0.203	0.123	3.66503491692114e-110	CD14M_1	SEC61A1
1.60268452454188e-114	0.331336	0.107	0.051	4.06296553816611e-110	CD14M_1	SLC16A5
1.62049703988454e-114	0.147019	0.214	0.131	4.1081220458113e-110	CD14M_1	BCKDK
1.96033784738903e-114	0.10284	0.827	0.607	4.96965247691594e-110	CD14M_1	UQCRB
2.01470760003342e-114	0.394327	0.109	0.052	5.10748523684471e-110	CD14M_1	C16orf74
2.22774664028187e-114	0.154	0.202	0.121	5.64756050777858e-110	CD14M_1	PPFIA1
2.34452127440434e-114	0.215969	0.22	0.137	5.94359588274245e-110	CD14M_1	MRPS15
3.24565875694287e-114	0.58333	0.055	0.017	8.22806951472588e-110	CD14M_1	HP
3.6552128045215e-114	0.180904	0.196	0.117	9.26632998074245e-110	CD14M_1	LPXN
6.17453964706934e-114	0.580307	0.087	0.038	1.56530754592855e-109	CD14M_1	CITED4
7.82492117224354e-114	0.289394	0.196	0.118	1.98369576637546e-109	CD14M_1	ZNF581
8.8325211249166e-114	0.202945	0.224	0.14	2.23913243037761e-109	CD14M_1	VKORC1
1.50715177924311e-113	0.13672	0.279	0.184	3.8207804755592e-109	CD14M_1	NDUFV1
2.48080302658093e-113	0.387791	0.113	0.055	6.28908375268532e-109	CD14M_1	FAM193B
2.84977870563439e-113	0.164218	0.263	0.171	7.22447399665374e-109	CD14M_1	PSMB7
3.00387128514788e-113	0.104578	0.278	0.181	7.61511409497839e-109	CD14M_1	ILF3
6.4836757502738e-113	0.145834	0.247	0.158	1.64367663945191e-108	CD14M_1	TMEM259
9.99557830645643e-113	0.319011	0.129	0.067	2.53397905646977e-108	CD14M_1	CACNA2D3
1.13951140413328e-112	0.287369	0.169	0.097	2.88877536061828e-108	CD14M_1	IGFBP7
1.77656266405641e-112	0.259124	0.161	0.091	4.5037640096494e-108	CD14M_1	BRD3
3.10686294799151e-112	0.128645	0.245	0.156	7.87620825945328e-108	CD14M_1	MAP2K2
8.5870319204614e-112	0.223414	0.143	0.077	2.17689846215617e-107	CD14M_1	LMNB1
1.28064918422301e-111	0.247435	0.195	0.117	3.24657374692376e-107	CD14M_1	CUEDC2
1.97606958046014e-111	0.267082	0.14	0.075	5.0095339934245e-107	CD14M_1	TXNRD2
2.30394689074125e-111	0.318634	0.13	0.068	5.84073576271814e-107	CD14M_1	CRLS1
2.53724790564967e-111	0.108341	0.255	0.163	6.43217716561247e-107	CD14M_1	CMTM3
4.0630446150795e-111	0.15543	0.179	0.104	1.0300224403688e-106	CD14M_1	ATXN7L1
4.84684955372252e-111	0.115249	0.215	0.132	1.2287248303642e-106	CD14M_1	CHPT1
7.98782284814637e-111	0.515003	0.086	0.037	2.02499297023359e-106	CD14M_1	PRLR
8.94709678009747e-111	0.157843	0.227	0.143	2.26817850472251e-106	CD14M_1	RASGRP4
1.02349149694884e-110	0.431668	0.155	0.087	2.59465329391501e-106	CD14M_1	RAB34
1.24432487918865e-110	0.268097	0.199	0.121	3.15448800123115e-106	CD14M_1	GRHPR
1.30069401336242e-110	0.200616	0.25	0.163	3.29738939327508e-106	CD14M_1	HSD17B10
1.3779457721036e-110	0.216634	0.199	0.121	3.49323032685983e-106	CD14M_1	DNTTIP1
1.77806161791154e-110	0.139838	0.205	0.124	4.50756400756755e-106	CD14M_1	PITPNA
2.26147648390717e-110	0.131728	0.237	0.15	5.73306903435306e-106	CD14M_1	AGPAT2
2.78417670899017e-110	0.541514	0.09	0.04	7.05816637496099e-106	CD14M_1	MARVELD1
9.0578291196487e-110	0.124724	0.901	0.699	2.29625026012214e-105	CD14M_1	EEF1G
1.20017180808509e-109	0.43496	0.108	0.053	3.04255555067652e-105	CD14M_1	NCEH1
1.77780574372398e-109	0.29521	0.097	0.045	4.50691534091467e-105	CD14M_1	MIR646HG
2.9144632548328e-109	0.112672	0.993	0.917	7.38845579732664e-105	CD14M_1	RPS3
3.79545605258321e-109	0.114725	0.924	0.738	9.62186063890371e-105	CD14M_1	LAPTM5
4.24160720869863e-109	0.351012	0.121	0.062	1.07528984347719e-104	CD14M_1	RGL2
5.7543230558451e-109	0.107387	0.173	0.099	1.45877843788729e-104	CD14M_1	VPS54
2.20811181752076e-108	0.11915	0.256	0.166	5.59778426859687e-104	CD14M_1	ESD
6.64584243453916e-108	0.145926	0.252	0.164	1.68478751558002e-103	CD14M_1	NDUFS3
7.0598661995648e-108	-2.55593	0.011	0.05	1.78974668025167e-103	CD14M_1	DUSP5
1.9667647833532e-107	0.168989	0.238	0.152	4.98594540227869e-103	CD14M_1	PPA1
2.08576302447192e-107	0.128646	0.989	0.899	5.28761784333877e-103	CD14M_1	RPS21
2.5822262373018e-107	-0.12132	0.392	0.266	6.5462017341838e-103	CD14M_1	PELI1
2.67681427726221e-107	0.229655	0.195	0.119	6.78599187428743e-103	CD14M_1	PMF1
4.45306420030623e-107	0.132449	0.171	0.099	1.12889630541963e-102	CD14M_1	CARHSP1
4.65935694492907e-107	0.141598	0.209	0.129	1.18119357910897e-102	CD14M_1	DDRGK1
5.03288434859661e-107	0.232713	0.128	0.067	1.27588651121273e-102	CD14M_1	NFIA
5.33314213560288e-107	0.404753	0.126	0.066	1.35200486279669e-102	CD14M_1	IL18
5.43335895667861e-107	0.166756	0.222	0.141	1.3774108291076e-102	CD14M_1	SNRPA
5.92878641329822e-107	0.211891	0.085	0.037	1.50300664363523e-102	CD14M_1	STEAP4
5.93450411567451e-107	0.102183	0.265	0.173	1.50445613836464e-102	CD14M_1	C6orf62
7.92249865492908e-107	0.242456	0.185	0.111	2.00843263401107e-102	CD14M_1	KIF22
1.37023118437002e-106	-1.92046	0.029	0.078	3.47367307549643e-102	CD14M_1	KLF12
1.39763674957446e-106	0.138869	0.208	0.129	3.54314892384621e-102	CD14M_1	MRPL28
1.63317674946746e-106	-2.11759	0.025	0.072	4.14026637757497e-102	CD14M_1	SNED1
1.87777942690273e-106	0.240231	0.12	0.061	4.76035862514112e-102	CD14M_1	KIAA0040
4.12091815651662e-106	0.385628	0.105	0.051	1.04469396185853e-101	CD14M_1	NDST1
4.73000099014941e-106	-0.315807	0.177	0.099	1.19910255101278e-101	CD14M_1	ALOX5AP
5.43507762652207e-106	0.200551	0.151	0.084	1.37784652909961e-101	CD14M_1	HEATR5B
5.77077665595143e-106	-0.39171	0.996	0.963	1.46294959005025e-101	CD14M_1	CD74
7.42368662959965e-106	0.114587	0.173	0.101	1.88197879746981e-101	CD14M_1	HIPK1
1.05756833624659e-105	0.702575	0.056	0.019	2.68104148921873e-101	CD14M_1	RNASE4
1.09134620989191e-105	0.339221	0.73	0.593	2.76667177669699e-101	CD14M_1	CRIP1
1.78804172848703e-105	0.242581	0.165	0.096	4.53286458588748e-101	CD14M_1	IFT20
1.8551506383238e-105	0.339221	0.126	0.066	4.70299238321467e-101	CD14M_1	RILP
2.36996714236225e-105	0.159491	0.139	0.075	6.00810370260255e-101	CD14M_1	HPSE
4.4299783073598e-105	0.352165	0.122	0.064	1.12304380069878e-100	CD14M_1	ST3GAL6
4.73975352068428e-105	0.501317	0.085	0.038	1.20157491502867e-100	CD14M_1	SAP30
5.35104202867028e-105	0.357695	0.097	0.046	1.3565426646882e-100	CD14M_1	NEK4
1.70128272923784e-104	-1.81203	0.037	0.09	4.31292184689085e-100	CD14M_1	IFIT2
2.31235161398817e-104	0.120559	0.203	0.125	5.86204257662142e-100	CD14M_1	ATXN2
2.660067014136e-104	-2.09787	0.022	0.068	6.74353588753618e-100	CD14M_1	FMNL2
3.79639367895412e-104	0.342551	0.111	0.056	9.62423761551659e-100	CD14M_1	VPS9D1
1.80455804547601e-103	0.248875	0.127	0.067	4.57473510108623e-99	CD14M_1	NOD2
1.94692295688375e-103	0.188107	0.156	0.089	4.93564438799601e-99	CD14M_1	TK2
2.63549317475863e-103	-1.45625	0.081	0.145	6.6812387473306e-99	CD14M_1	SIGLEC10
2.8693585316443e-103	0.50363	0.074	0.031	7.27411081357146e-99	CD14M_1	CPNE2
3.12222866899846e-103	1.89858	0.032	0.007	7.91516189877799e-99	CD14M_1	CAVIN3
3.7619630560213e-103	0.137712	0.219	0.138	9.53695254331959e-99	CD14M_1	BCKDHA
5.58589323068568e-103	0.265455	0.138	0.076	1.41607979291113e-98	CD14M_1	TUG1
9.19765086549748e-103	-2.04737	0.018	0.06	2.33169647091227e-98	CD14M_1	MGLL
1.20818391807825e-102	0.181133	0.165	0.096	3.06286705072017e-98	CD14M_1	PPTC7
1.39657692789706e-102	0.117053	0.182	0.109	3.54046216991185e-98	CD14M_1	EDEM3
1.55306724230081e-102	0.299596	0.107	0.053	3.93718076595679e-98	CD14M_1	FAM160A2
3.60860520961102e-102	0.11567	0.256	0.169	9.14817506688488e-98	CD14M_1	PSMD9
3.87802825089164e-102	0.106079	0.24	0.155	9.83118941883539e-98	CD14M_1	CEP85L
4.2799438742925e-102	0.218217	0.163	0.096	1.08500857157189e-97	CD14M_1	NKIRAS2
7.50586616039436e-102	0.282448	0.141	0.079	1.90281213032157e-97	CD14M_1	CERS2
9.76225708502382e-102	0.136089	0.151	0.085	2.47482979362439e-97	CD14M_1	ATP13A3
1.48941019242547e-101	0.197892	0.131	0.07	3.77580377881782e-97	CD14M_1	SLC16A6
2.43681281414801e-101	0.158677	0.253	0.167	6.17756416514662e-97	CD14M_1	CITED2
5.84942775647568e-101	0.146958	0.209	0.131	1.48288843054415e-96	CD14M_1	SLC12A9
6.06470863390592e-101	0.218945	0.146	0.082	1.53746428578149e-96	CD14M_1	CIDEB
7.05908393852113e-101	0.146462	0.187	0.113	1.78954836925449e-96	CD14M_1	CASC4
1.03035457656193e-100	0.673566	0.05	0.016	2.61205188704215e-96	CD14M_1	CLTCL1
1.63832195082372e-100	0.14811	0.194	0.12	4.1533099775332e-96	CD14M_1	CAPN1
2.80455635705883e-100	0.134162	0.15	0.085	7.10983082077983e-96	CD14M_1	GK
2.95192030393456e-100	0.252658	0.147	0.084	7.4834131625045e-96	CD14M_1	PRDX2
6.69483730451608e-100	0.105801	0.209	0.132	1.69720820506787e-95	CD14M_1	IDH3B
8.89288514170889e-100	-2.14416	0.015	0.054	2.25443531227462e-95	CD14M_1	PTP4A3
1.39289913556965e-99	0.258296	0.137	0.076	3.53113859858263e-95	CD14M_1	IFFO1
1.41138957053667e-99	0.148301	0.095	0.045	3.5780137002675e-95	CD14M_1	CYP1B1-AS1
2.14449766875307e-99	0.206521	0.209	0.133	5.43651604005591e-95	CD14M_1	RENBP
3.06642005596036e-99	0.271357	0.116	0.061	7.77368148386511e-95	CD14M_1	ADAM9
6.81287459499382e-99	0.121002	0.114	0.058	1.72713183857688e-94	CD14M_1	LPAR1
9.38572300757774e-99	0.224868	0.142	0.08	2.37937463965103e-94	CD14M_1	ACSS2
1.11358519990904e-98	0.107431	0.261	0.174	2.82304984028941e-94	CD14M_1	CDC40
1.3611485296735e-98	0.154297	0.142	0.08	3.45064763757529e-94	CD14M_1	CAMK2G
1.37052452312144e-98	-0.109397	0.35	0.239	3.47441671856517e-94	CD14M_1	JAZF1
1.4595594674099e-98	0.191831	0.174	0.105	3.70012920583083e-94	CD14M_1	NSMCE1
1.55478667687009e-98	0.992822	0.052	0.018	3.94153970453336e-94	CD14M_1	TRIM7
3.02510621366304e-98	0.106448	0.214	0.136	7.66894676225716e-94	CD14M_1	WASHC2C
5.70179129316476e-98	-0.139953	0.434	0.304	1.4454611107302e-93	CD14M_1	ELMO1
6.92201000807182e-98	0.128366	0.177	0.106	1.75479875714629e-93	CD14M_1	LGALS8
7.18410687947049e-98	0.118948	0.08	0.035	1.82124293501456e-93	CD14M_1	PROK2
9.61838949849727e-98	0.114905	0.172	0.103	2.43835792176404e-93	CD14M_1	SELENOO
1.04752203322166e-97	0.102964	0.137	0.075	2.65557310642023e-93	CD14M_1	FAR2
1.22405771963242e-97	0.211681	0.154	0.089	3.10310872504016e-93	CD14M_1	DENND6B
2.32356990117578e-97	0.157151	0.156	0.091	5.89048205647072e-93	CD14M_1	ARNT
3.69827059718466e-97	0.211619	0.146	0.083	9.37548579092283e-93	CD14M_1	KLHL8
3.99863860081021e-97	0.122098	0.16	0.094	1.0136948716914e-92	CD14M_1	SLC23A2
6.44390351101152e-97	0.182222	0.126	0.068	1.63359397907653e-92	CD14M_1	C16orf70
7.31256904449896e-97	0.167342	0.107	0.054	1.85380937847093e-92	CD14M_1	STX3
8.91009322555464e-97	-2.43916	0.016	0.055	2.25879773361036e-92	CD14M_1	IFIT1
1.58196373914195e-96	0.322934	0.081	0.036	4.01043627509877e-92	CD14M_1	FXYD6
2.56317931554715e-96	0.423978	0.083	0.038	6.49791588284358e-92	CD14M_1	PRRG4
4.78188826411203e-96	0.271956	0.105	0.053	1.21225649383504e-91	CD14M_1	EFCAB2
8.85413967614412e-96	0.138015	0.138	0.077	2.2446129492993e-91	CD14M_1	AC005280.2
1.68686486356138e-95	-0.455228	0.89	0.797	4.27637111561445e-91	CD14M_1	MT-CYB
2.1595807952382e-95	0.160442	0.189	0.118	5.47475327400837e-91	CD14M_1	NXF1
2.82358239582141e-95	0.101954	0.234	0.153	7.15806373164685e-91	CD14M_1	SLC38A10
3.50862093832065e-95	0.102403	0.2	0.126	8.89470494073668e-91	CD14M_1	AP3D1
3.91158236059961e-95	0.109682	0.225	0.146	9.91625244235607e-91	CD14M_1	NDUFS4
7.04964569029163e-95	0.247141	0.112	0.059	1.78715567894583e-90	CD14M_1	ACAP3
1.00043546756213e-94	0.206746	0.13	0.072	2.53620395381676e-90	CD14M_1	ANO10
1.11264908037307e-94	0.102057	0.226	0.147	2.82067668365376e-90	CD14M_1	EEA1
1.30784615978382e-94	0.591198	0.062	0.024	3.31552079966795e-90	CD14M_1	PRICKLE1
1.41072991278052e-94	0.613789	0.065	0.026	3.5763414018899e-90	CD14M_1	LINC02723
1.52133579223072e-94	0.294534	0.127	0.07	3.85673836688411e-90	CD14M_1	BSCL2
1.80594764411318e-94	0.260309	0.146	0.084	4.57825787259131e-90	CD14M_1	GLMP
2.5578100827911e-94	0.180473	0.136	0.076	6.48430434088373e-90	CD14M_1	MAVS
2.60824758871747e-94	0.119044	0.191	0.119	6.61216846215767e-90	CD14M_1	HINT2
2.68863753316681e-94	0.103966	0.255	0.171	6.81596501033119e-90	CD14M_1	AIMP1
3.65487446994963e-94	0.104982	0.999	0.969	9.2654722687693e-90	CD14M_1	RPS12
4.73527848959949e-94	0.115382	0.169	0.101	1.20044044989837e-89	CD14M_1	KPNA6
1.02642108326035e-93	0.251253	0.103	0.052	2.6020800881733e-89	CD14M_1	ADCY9
1.1910471913978e-93	0.102422	0.205	0.131	3.01942373491257e-89	CD14M_1	LRCH4
1.33260366340701e-93	0.132699	0.141	0.08	3.37828354710312e-89	CD14M_1	ZBTB16
1.42052419202168e-93	0.428621	0.053	0.019	3.60117087919417e-89	CD14M_1	AC124248.1
1.77821799707752e-93	0.116428	0.312	0.219	4.50796044439122e-89	CD14M_1	CYC1
2.11467996618102e-93	0.276404	0.114	0.061	5.36092518226551e-89	CD14M_1	FHOD1
2.22263567350711e-93	0.871851	0.068	0.029	5.63460369590787e-89	CD14M_1	TNNT1
3.18725402888451e-93	0.336938	0.101	0.051	8.08000768862513e-89	CD14M_1	GRAMD4
3.46433277870672e-93	0.120758	0.179	0.111	8.78243002729942e-89	CD14M_1	RGS14
3.63102686170375e-93	0.334083	0.085	0.04	9.20501619710518e-89	CD14M_1	UBTD1
3.73156874864819e-93	0.11628	0.206	0.131	9.45989993469802e-89	CD14M_1	SPG7
1.0258258725702e-92	0.21285	0.142	0.081	2.60057116955272e-88	CD14M_1	SLK
1.08780602333855e-92	0.191812	0.094	0.046	2.75769704976556e-88	CD14M_1	PTPN22
1.87788034430436e-92	0.162746	0.185	0.115	4.76061446084598e-88	CD14M_1	KCNK6
5.81795353490412e-92	0.138932	0.194	0.122	1.47490940063354e-87	CD14M_1	TNK2
8.47895801095871e-92	0.132162	0.91	0.706	2.14950064535814e-87	CD14M_1	SLC25A6
1.21987566298116e-91	0.142747	0.2	0.127	3.09250679322353e-87	CD14M_1	OIP5-AS1
1.3339002819983e-91	-0.100908	0.527	0.382	3.38157060489389e-87	CD14M_1	SEC61G
1.34107299811621e-91	0.193893	0.156	0.092	3.39975415752441e-87	CD14M_1	FRAT2
2.60910607039587e-91	0.137163	0.173	0.106	6.61434479906056e-87	CD14M_1	BMPR2
2.83220122044568e-91	0.22754	0.128	0.071	7.17991331395184e-87	CD14M_1	TLR5
4.34260532890632e-91	0.465486	0.084	0.04	1.10089387693104e-86	CD14M_1	MITF
4.66388324091518e-91	0.228207	0.158	0.094	1.18234104040441e-86	CD14M_1	SPTSSA
4.67955993757538e-91	0.129851	0.208	0.133	1.18631523977474e-86	CD14M_1	GSN
4.94256339633356e-91	0.100945	0.222	0.144	1.25298924660452e-86	CD14M_1	PRKAR2A
7.79497084379413e-91	0.129385	0.151	0.088	1.97610305861025e-86	CD14M_1	MBTPS1
9.57760312719768e-91	0.32962	0.108	0.057	2.42801816877588e-86	CD14M_1	CD84
1.97524979249752e-90	0.126169	0.218	0.143	5.00745574896046e-86	CD14M_1	CCAR1
2.38586204214989e-90	0.10296	0.229	0.152	6.0483988630542e-86	CD14M_1	MRPL21
2.51838834899642e-90	0.648441	0.052	0.019	6.38436630354083e-86	CD14M_1	SPOCK1
2.59582075200244e-90	0.161274	0.139	0.08	6.5806651884014e-86	CD14M_1	AMFR
2.94477315019772e-90	0.159877	0.157	0.094	7.46529441306624e-86	CD14M_1	ZNF428
3.29234594534666e-90	0.693696	0.074	0.033	8.34642620604833e-86	CD14M_1	RAB13
3.58432580150927e-90	0.177127	0.221	0.145	9.08662433940616e-86	CD14M_1	NBPF10
6.06107919693304e-90	0.59027	0.072	0.032	1.5365441872145e-85	CD14M_1	MAFG
9.02064675019418e-90	-1.18751	0.152	0.218	2.28682415764173e-85	CD14M_1	ABI3
1.10628384318702e-89	0.123369	0.154	0.091	2.80454017086341e-85	CD14M_1	ORAI2
1.15365579520436e-89	0.492946	0.089	0.044	2.92463280642258e-85	CD14M_1	SPINT1
1.72728511093869e-89	0.121848	0.136	0.077	4.37884048474068e-85	CD14M_1	SMURF2
1.77173726356362e-89	0.671042	0.053	0.02	4.49153113686014e-85	CD14M_1	ANG
2.05935067061233e-89	0.586653	0.057	0.022	5.22065988506931e-85	CD14M_1	TMEM150B
2.06587454920585e-89	0.162982	0.179	0.111	5.23719856969175e-85	CD14M_1	EIF3B
2.1226686319079e-89	0.306554	0.103	0.053	5.38117724874971e-85	CD14M_1	SAP25
2.37875831097787e-89	0.440319	0.071	0.031	6.03039019415999e-85	CD14M_1	HLX
3.66278349470562e-89	-1.64922	0.108	0.17	9.28552243742823e-85	CD14M_1	LTB
4.08225721132149e-89	0.147323	0.215	0.14	1.03489302564211e-84	CD14M_1	CPNE1
4.73819258484192e-89	0.210688	0.144	0.084	1.20117920218328e-84	CD14M_1	FHL3
5.09384196570991e-89	0.286539	0.118	0.064	1.29133987672712e-84	CD14M_1	OSBPL1A
5.23800142576495e-89	0.229847	0.119	0.065	1.32788574144567e-84	CD14M_1	CPM
6.957663120934e-89	0.289015	0.135	0.077	1.76383717778798e-84	CD14M_1	DDX41
7.65706200737177e-89	-0.108801	0.414	0.297	1.94114178948882e-84	CD14M_1	WAC
8.04953322567916e-89	0.122123	0.258	0.174	2.04063716804192e-84	CD14M_1	FBP1
1.1524446092585e-88	0.111137	0.193	0.122	2.92156232893121e-84	CD14M_1	GTF2F1
1.61724102314005e-88	0.116852	0.127	0.07	4.09986771776234e-84	CD14M_1	LATS2
2.09826821452039e-88	0.229927	0.15	0.089	5.31931975063064e-84	CD14M_1	GNA15
2.90290129523677e-88	0.115031	0.177	0.11	7.35914507355473e-84	CD14M_1	MRPL23
3.56014837059889e-88	-0.108159	0.371	0.262	9.02533213430525e-84	CD14M_1	VPS13B
4.00594760674072e-88	-1.33457	0.207	0.269	1.01554777778484e-83	CD14M_1	HLA-DQA1
4.04574116279559e-88	0.309023	0.088	0.043	1.02563584218031e-83	CD14M_1	RUSC2
4.87125058320203e-88	-2.88577	0.031	0.074	1.23491073534755e-83	CD14M_1	CCL5
5.20647868365038e-88	0.249453	0.121	0.067	1.31989441109221e-83	CD14M_1	EBPL
6.13945130086702e-88	0.122464	0.985	0.864	1.5564122992828e-83	CD14M_1	CYBA
7.68521558354807e-88	0.193224	0.131	0.074	1.94827900258527e-83	CD14M_1	DAGLB
1.15521577588989e-87	0.174917	0.181	0.113	2.92858751345846e-83	CD14M_1	HDGF
1.32147963461772e-87	0.106759	0.211	0.138	3.35008302171939e-83	CD14M_1	PRKACA
1.72554615188256e-87	0.118242	0.16	0.097	4.37443204963748e-83	CD14M_1	MTF1
2.34557754271459e-87	0.137942	0.203	0.131	5.94627362853575e-83	CD14M_1	TOLLIP
2.64528677810564e-87	0.112766	0.177	0.11	6.70606651117562e-83	CD14M_1	IKBIP
4.30199005518885e-87	-4.79516	0.001	0.025	1.09059749889093e-82	CD14M_1	SH2D1B
6.02256209340039e-87	-2.63917	0.008	0.04	1.52677971629793e-82	CD14M_1	PPM1N
6.35126919297472e-87	0.112506	0.208	0.135	1.61011025311102e-82	CD14M_1	ARHGEF6
6.64985036352613e-87	0.302949	0.106	0.056	1.68580356565751e-82	CD14M_1	MS4A4E
7.29553682551289e-87	0.131966	0.22	0.146	1.84949154063577e-82	CD14M_1	ANTKMT
8.0892704320472e-87	0.186299	0.161	0.098	2.05071094722828e-82	CD14M_1	PTOV1
1.12223449438847e-86	0.156664	0.138	0.08	2.84497666672422e-82	CD14M_1	ARHGEF11
1.30145037802301e-86	0.839634	0.053	0.02	3.29930685332614e-82	CD14M_1	CDC42EP1
1.5123278461357e-86	0.554049	0.066	0.028	3.83390232273862e-82	CD14M_1	UAP1L1
3.47866407066298e-86	0.16144	0.161	0.099	8.81876128553773e-82	CD14M_1	ABHD14B
3.70144144871861e-86	-0.117409	0.25	0.165	9.38352421664655e-82	CD14M_1	EPB41
7.3075562436906e-86	0.179823	0.162	0.1	1.852538583338e-81	CD14M_1	SNHG16
8.13412817753316e-86	-0.114017	0.269	0.181	2.06208283428643e-81	CD14M_1	KDM6A
8.26711843270189e-86	0.331828	0.102	0.054	2.09579719387426e-81	CD14M_1	CEACAM4
1.20077370598364e-85	-0.117883	0.454	0.329	3.04408142203912e-81	CD14M_1	INPP5D
1.20766987597005e-85	0.108723	0.155	0.093	3.06156390257167e-81	CD14M_1	RNGTT
1.22097218831926e-85	0.154137	0.137	0.079	3.09528659460816e-81	CD14M_1	FER
1.23288386340102e-85	0.310615	0.104	0.055	3.12548388210792e-81	CD14M_1	TOM1L2
2.13397497244345e-85	0.112948	0.99	0.897	5.4098399526414e-81	CD14M_1	RPS4X
2.15775327930294e-85	-0.108677	0.453	0.329	5.47012033836089e-81	CD14M_1	ARGLU1
2.15899950655085e-85	0.156882	0.155	0.094	5.47327964905705e-81	CD14M_1	DYNC1LI2
2.80075760362332e-85	0.808252	0.043	0.014	7.10020060094548e-81	CD14M_1	SERPINI2
2.84422951543834e-85	0.272453	0.119	0.066	7.21040624458774e-81	CD14M_1	MBD6
3.33972413185784e-85	0.105537	0.94	0.759	8.4665346466728e-81	CD14M_1	RPS5
3.77201307609825e-85	0.111259	0.17	0.105	9.56243034921668e-81	CD14M_1	HGSNAT
4.65835819513928e-85	0.180044	0.154	0.093	1.18094038604976e-80	CD14M_1	WASHC2A
6.34299874113697e-85	0.299696	0.1	0.052	1.60801361086563e-80	CD14M_1	SERPINB8
6.58341006436717e-85	0.210086	0.105	0.056	1.66896028541772e-80	CD14M_1	INTS6
9.57991813057293e-85	0.143809	0.153	0.092	2.42860504528154e-80	CD14M_1	RAB20
9.70585977398501e-85	0.11066	0.165	0.102	2.46053251130294e-80	CD14M_1	SIN3B
9.85631111730697e-85	-0.125087	0.338	0.236	2.49867343134849e-80	CD14M_1	ITPR2
1.00334030987413e-84	0.176531	0.182	0.116	2.54356801956192e-80	CD14M_1	CCS
1.14520276504667e-84	0.226004	0.132	0.076	2.90320352966981e-80	CD14M_1	SMARCD2
1.44324659206459e-84	0.174914	0.153	0.093	3.65877443554294e-80	CD14M_1	PGP
1.45964923061977e-84	0.887621	0.035	0.01	3.70035676454419e-80	CD14M_1	BPI
2.19601269588145e-84	0.509749	0.057	0.023	5.56711178532905e-80	CD14M_1	AC005632.3
3.36775330194681e-84	0.145737	0.156	0.094	8.53759139576536e-80	CD14M_1	DNAJC10
4.12301989725626e-84	0.112389	0.169	0.105	1.04522677415343e-79	CD14M_1	SERTAD2
6.52739629132706e-84	0.20524	0.159	0.098	1.65476023381432e-79	CD14M_1	AHCYL1
1.39312874108476e-83	0.337608	0.101	0.053	3.53172067152398e-79	CD14M_1	BTBD2
1.39360374627606e-83	-0.277306	0.979	0.862	3.53292485718443e-79	CD14M_1	COTL1
1.58702856191102e-83	0.223022	0.127	0.072	4.02327610730062e-79	CD14M_1	PPIF
1.93487172626813e-83	0.24499	0.127	0.073	4.90509331326233e-79	CD14M_1	FGD6
2.50128036350131e-83	0.26189	0.112	0.061	6.34099584951218e-79	CD14M_1	TBC1D10B
4.30406820602428e-83	0.210879	0.128	0.073	1.09112433090922e-78	CD14M_1	AGAP3
4.51511216083623e-83	0.172648	0.157	0.096	1.14462608389359e-78	CD14M_1	SMIM29
1.01111811613377e-82	0.116971	0.094	0.048	2.56328553621072e-78	CD14M_1	FCAR
1.20778632055247e-82	0.118978	0.153	0.093	3.06185910123257e-78	CD14M_1	NSMAF
1.21143034981466e-82	0.222227	0.09	0.045	3.07109707981515e-78	CD14M_1	LINC00623
1.27608384174914e-82	0.212705	0.107	0.058	3.23500014721824e-78	CD14M_1	PGPEP1
1.90766832588295e-82	0.12721	0.18	0.114	4.83612997294588e-78	CD14M_1	SIL1
3.17418866823099e-82	0.102661	0.192	0.125	8.04688569283239e-78	CD14M_1	PTDSS1
3.87190691889395e-82	0.114572	0.155	0.094	9.81567123008804e-78	CD14M_1	GPAT3
4.25491296452595e-82	0.1301	0.132	0.076	1.07866298563697e-77	CD14M_1	ABCA7
4.41224160158978e-82	0.148238	0.159	0.098	1.11854736841902e-77	CD14M_1	MVB12A
4.60177410597114e-82	0.107704	0.224	0.151	1.16659575360474e-77	CD14M_1	COMMD9
4.68050091564542e-82	0.101152	0.195	0.126	1.18655378712527e-77	CD14M_1	NFATC2IP
5.11172732879173e-82	0.211217	0.135	0.08	1.29587399512199e-77	CD14M_1	ATRN
6.46078154275046e-82	-0.101702	0.431	0.314	1.63787272890267e-77	CD14M_1	KMT2E
6.99381217838198e-82	0.345055	0.07	0.032	1.77300132534162e-77	CD14M_1	KBTBD11
1.08001700317522e-81	0.175765	0.137	0.08	2.7379511047495e-77	CD14M_1	ATP8B4
1.39501022285043e-81	0.166549	0.114	0.063	3.53649041594811e-77	CD14M_1	B3GNTL1
1.75956856797809e-81	0.106428	0.208	0.138	4.46068227668125e-77	CD14M_1	MTCH2
2.20542921848456e-81	-0.130441	0.374	0.268	5.5909836117802e-77	CD14M_1	TM9SF2
2.38706991169176e-81	0.113448	0.141	0.084	6.05146093312978e-77	CD14M_1	PAM16
2.42950402009821e-81	-0.123945	0.362	0.258	6.15903564135098e-77	CD14M_1	PTPN2
2.78871016550124e-81	0.147672	0.128	0.074	7.06965914056219e-77	CD14M_1	PPP4R1
3.60473938576186e-81	-2.85229	0.005	0.033	9.1383748168449e-77	CD14M_1	KCNMA1
3.89840190176312e-81	0.15836	0.15	0.091	9.88283866115968e-77	CD14M_1	LUC7L
5.19417651360232e-81	0.141497	0.085	0.042	1.31677568796333e-76	CD14M_1	CD82
6.53420492489133e-81	0.197524	0.149	0.091	1.6564862905092e-76	CD14M_1	MID1IP1
8.18279912344531e-81	0.183179	0.136	0.08	2.07442140578462e-76	CD14M_1	TTBK2
8.70057001038734e-81	0.176796	0.161	0.101	2.2056815033333e-76	CD14M_1	CHCHD1
1.85824657683269e-80	0.198131	0.121	0.069	4.71084089692855e-76	CD14M_1	NCLN
3.17235317668629e-80	0.117278	0.174	0.11	8.0422325382174e-76	CD14M_1	BICD2
3.28051566094564e-80	0.205209	0.101	0.054	8.31643525206328e-76	CD14M_1	FBN2
3.67393578835886e-80	0.251879	0.149	0.091	9.31379461706854e-76	CD14M_1	GABBR1
3.73853746955785e-80	0.170295	0.129	0.075	9.47756633907612e-76	CD14M_1	DHRS4L2
3.9288979054576e-80	-0.113544	0.401	0.291	9.96014908012556e-76	CD14M_1	ERICH1
6.08575634245056e-80	0.110854	0.212	0.142	1.54280009037464e-75	CD14M_1	DCTN2
7.76422634332698e-80	0.153714	0.137	0.082	1.96830902029682e-75	CD14M_1	HEATR5A
1.17428171935434e-79	0.282195	0.108	0.059	2.9769215867352e-75	CD14M_1	MAPK3
1.77932500818497e-79	0.20847	0.109	0.06	4.51076682824972e-75	CD14M_1	ARSD
2.97403838375433e-79	0.14365	0.175	0.112	7.53948470665561e-75	CD14M_1	C12orf10
3.05096521633932e-79	0.219679	0.114	0.064	7.73450191994181e-75	CD14M_1	WDTC1
3.08735942963215e-79	0.204007	0.107	0.059	7.82676489006046e-75	CD14M_1	CRTC1
4.73562699396296e-79	0.141874	0.19	0.125	1.20052879923955e-74	CD14M_1	SPNS1
4.85188839653086e-79	0.133514	0.134	0.079	1.23000222740454e-74	CD14M_1	SMG5
5.29562756046466e-79	0.119028	0.968	0.81	1.3424945428534e-74	CD14M_1	RPS25
6.02887163327943e-79	0.175045	0.115	0.065	1.52837924775267e-74	CD14M_1	DSTYK
7.45028133093267e-79	-0.102852	0.259	0.177	1.88872082020474e-74	CD14M_1	PACS1
9.53646296991396e-79	0.167042	0.144	0.087	2.41758872750289e-74	CD14M_1	NDUFAF2
9.63152828670421e-79	0.671289	0.061	0.027	2.44168873596238e-74	CD14M_1	PDE7B
1.10544229992886e-78	0.180771	0.112	0.062	2.80240677454965e-74	CD14M_1	NDST2
1.17613749556458e-78	0.645452	0.038	0.012	2.98162616500577e-74	CD14M_1	LINC01127
1.21518690103497e-78	0.123615	0.147	0.09	3.08062031281375e-74	CD14M_1	ATP2A2
1.89016688653242e-78	0.588015	0.046	0.017	4.79176207404835e-74	CD14M_1	SERINC2
2.05145605104809e-78	0.392074	0.08	0.039	5.20064623501202e-74	CD14M_1	RHOU
3.94923440931514e-78	0.218932	0.118	0.067	1.00117041510548e-73	CD14M_1	IQSEC2
4.67285689600873e-78	0.147819	0.132	0.078	1.18461595170717e-73	CD14M_1	PWWP2A
4.91954935801143e-78	0.117608	0.148	0.09	1.24715495774948e-73	CD14M_1	PLEKHM2
6.07126336491927e-78	0.257504	0.098	0.053	1.53912597564068e-73	CD14M_1	ARPIN
6.19126258681082e-78	-0.217491	0.998	0.952	1.56954697838241e-73	CD14M_1	CST3
6.93694051744098e-78	0.123381	0.14	0.084	1.75858379057646e-73	CD14M_1	MEF2D
7.27032709744781e-78	-3.43999	0.003	0.026	1.84310062247399e-73	CD14M_1	IL21R
7.28884809943667e-78	0.141335	0.133	0.079	1.84779588168819e-73	CD14M_1	UBXN2B
9.08365152779749e-78	0.29582	0.088	0.045	2.30279649881194e-73	CD14M_1	STN1
1.09801551381693e-77	0.103404	0.219	0.148	2.78357912907729e-73	CD14M_1	BCOR
1.51218618450525e-77	0.19542	0.128	0.075	3.83354319633926e-73	CD14M_1	STX6
4.25862070237358e-77	0.106559	0.972	0.835	1.07960293425873e-72	CD14M_1	RPL24
5.40767201649905e-77	0.418681	0.079	0.039	1.37089893290268e-72	CD14M_1	SULT1A2
5.99831425352613e-77	0.191156	0.136	0.082	1.52063264641141e-72	CD14M_1	NMRAL1
6.44077205228313e-77	0.207887	0.108	0.06	1.6328001229743e-72	CD14M_1	RFX1
6.77576119559057e-77	0.275009	0.122	0.071	1.71772322069417e-72	CD14M_1	PLOD1
9.65948966841521e-77	0.112046	0.094	0.049	2.44877722583994e-72	CD14M_1	DSC2
1.32684584376255e-76	0.277859	0.094	0.05	3.36368689852244e-72	CD14M_1	UPK3BL1
1.3302378499961e-76	0.200173	0.087	0.045	3.37228597352512e-72	CD14M_1	ZNF487
1.37779362040519e-76	0.13825	0.161	0.101	3.49284460708919e-72	CD14M_1	TMEM18
1.38064668760734e-76	0.113958	0.162	0.102	3.50007741775336e-72	CD14M_1	POLR2J3
1.3861878392895e-76	0.282467	0.094	0.05	3.51412479138281e-72	CD14M_1	SLC36A1
1.41818102499899e-76	0.220204	0.101	0.055	3.59523071647494e-72	CD14M_1	AC010642.2
1.4509923586082e-76	0.245515	0.092	0.049	3.67841072830764e-72	CD14M_1	ENTPD6
1.96323231956778e-76	0.231174	0.122	0.071	4.97699025333628e-72	CD14M_1	OCEL1
2.43582441520015e-76	0.102919	0.147	0.09	6.17505847497389e-72	CD14M_1	CABIN1
3.76461861692695e-76	0.192763	0.12	0.069	9.54368465577151e-72	CD14M_1	MAN2A2
3.89316572536001e-76	0.13086	0.196	0.131	9.86956443036015e-72	CD14M_1	ALDH3B1
4.91980206007775e-76	-0.180765	0.446	0.325	1.24721902025031e-71	CD14M_1	SEC62
9.00805131828647e-76	0.101036	0.1	0.054	2.2836310896988e-71	CD14M_1	TCP11L2
9.8518119292807e-76	-0.182665	0.522	0.383	2.49753284219195e-71	CD14M_1	SIPA1L1
1.33324500213997e-75	-0.12205	0.394	0.286	3.37990940492503e-71	CD14M_1	ADAM10
1.63594271878445e-75	0.180876	0.155	0.098	4.14727838639045e-71	CD14M_1	PFDN4
2.25204979962006e-75	0.418	0.056	0.024	5.70917144701681e-71	CD14M_1	CMTM4
2.86354729868081e-75	0.138722	0.112	0.063	7.25937875688572e-71	CD14M_1	GCNT2
2.96604155392779e-75	0.112796	0.107	0.059	7.51921194336234e-71	CD14M_1	ARSG
3.18710378696764e-75	-0.10195	0.264	0.183	8.07962681034166e-71	CD14M_1	ZNF292
3.19611454738883e-75	0.344649	0.138	0.085	8.10246998908543e-71	CD14M_1	SNHG32
3.56449649459532e-75	0.139601	0.091	0.048	9.0363550634486e-71	CD14M_1	AL691403.1
3.6608029209222e-75	-0.105956	0.269	0.186	9.28050148482988e-71	CD14M_1	SEMA4D
7.62201661358683e-75	0.381232	0.054	0.023	1.9322574317104e-70	CD14M_1	CPAMD8
8.05278560040023e-75	0.254905	0.126	0.075	2.04146167755746e-70	CD14M_1	SLC22A18
8.6397164584726e-75	0.200822	0.105	0.058	2.19025451938739e-70	CD14M_1	ZSWIM8
1.14459682166318e-74	0.147004	0.136	0.082	2.90166740259834e-70	CD14M_1	KLHDC10
1.73595183103918e-74	0.160019	0.112	0.064	4.40081148686743e-70	CD14M_1	MROH1
1.88421269668942e-74	0.665411	0.049	0.02	4.77666760737736e-70	CD14M_1	RAB44
2.44918874124149e-74	0.146221	0.117	0.067	6.20893837792131e-70	CD14M_1	COQ8A
2.63351238312129e-74	0.19722	0.083	0.042	6.67621724245078e-70	CD14M_1	SLC25A29
3.0448354705716e-74	1.08667	0.031	0.009	7.71896240144607e-70	CD14M_1	ADAMTS2
5.60694389052415e-74	-0.108596	0.389	0.283	1.42141634568678e-69	CD14M_1	ATOX1
1.44431339135667e-73	0.2196	0.134	0.081	3.66147887842829e-69	CD14M_1	KHSRP
1.54136504766376e-73	0.804343	0.031	0.009	3.9075145323324e-69	CD14M_1	CASC8
2.59204592337583e-73	0.131038	0.123	0.072	6.57109562035007e-69	CD14M_1	SSBP3
2.88638999075852e-73	0.105371	0.178	0.117	7.31728726557192e-69	CD14M_1	FBXL15
2.90785616240025e-73	-4.84894	0.001	0.021	7.37170615730089e-69	CD14M_1	CYP4F22
3.0497093142629e-73	-0.11627	0.607	0.442	7.73131808258787e-69	CD14M_1	CUX1
3.52619841563923e-73	0.208015	0.097	0.053	8.93926560348702e-69	CD14M_1	IKBKE
4.13045067392855e-73	0.13512	0.139	0.085	1.04711055034763e-68	CD14M_1	STRN4
5.09605944868183e-73	0.102359	0.169	0.109	1.29190203083533e-68	CD14M_1	HGS
5.14063271319153e-73	0.168548	0.144	0.089	1.30320179912119e-68	CD14M_1	AP2A2
7.05043591241949e-73	-0.105035	0.462	0.343	1.78735600815746e-68	CD14M_1	XRCC5
7.89202359338749e-73	0.127951	0.106	0.06	2.00070690115966e-68	CD14M_1	FAM217B
8.48806269051469e-73	0.137367	0.141	0.087	2.15180877267238e-68	CD14M_1	APIP
1.15843424067063e-72	0.236317	0.11	0.063	2.93674664352411e-68	CD14M_1	UBXN6
1.47497728110768e-72	0.205225	0.136	0.084	3.73921490533609e-68	CD14M_1	GANAB
2.00667324638198e-72	0.11013	0.171	0.11	5.08711734690296e-68	CD14M_1	MIR181A1HG
2.15731355492874e-72	0.22914	0.083	0.043	5.46900559309986e-68	CD14M_1	RAB40C
2.32179326071789e-72	0.105965	0.154	0.097	5.88597809524593e-68	CD14M_1	CCDC6
2.5004061800087e-72	0.179745	0.103	0.057	6.33877970694006e-68	CD14M_1	CES2
2.67196465439302e-72	-0.100967	0.317	0.227	6.77369759535176e-68	CD14M_1	NFE2L2
2.77261136577252e-72	0.714149	0.046	0.018	7.02884707336991e-68	CD14M_1	TMEM8B
3.94207442960062e-72	0.249508	0.082	0.043	9.99355288648053e-68	CD14M_1	BATF
3.98367787693372e-72	0.399406	0.071	0.035	1.00990217858147e-67	CD14M_1	TTLL4
4.01605537369929e-72	0.168998	0.116	0.067	1.01811019778651e-67	CD14M_1	FAM210B
4.7557827020591e-72	0.334504	0.05	0.02	1.205638472799e-67	CD14M_1	S1PR3
5.83101006667572e-72	-0.125206	0.337	0.243	1.47821936200296e-67	CD14M_1	IQSEC1
5.85394412148963e-72	-0.126109	0.469	0.346	1.48403337423884e-67	CD14M_1	REEP5
6.56388303751079e-72	-0.364463	0.316	0.219	1.66400998883936e-67	CD14M_1	ACSL1
7.059414417558e-72	-0.123999	0.476	0.354	1.78963214899513e-67	CD14M_1	SP100
7.32167716612707e-72	0.391202	0.08	0.041	1.85611837838487e-67	CD14M_1	VENTX
7.39232933543859e-72	0.198634	0.11	0.063	1.87402940982704e-67	CD14M_1	LDLRAD3
8.5366912886329e-72	0.107184	0.207	0.14	2.16413660858133e-67	CD14M_1	MLEC
1.15806976744587e-71	-3.98171	0.002	0.023	2.93582266745202e-67	CD14M_1	LINC02345
1.81873427082714e-71	0.194367	0.112	0.065	4.61067324997388e-67	CD14M_1	INTS1
3.20681909401876e-71	0.176091	0.139	0.087	8.12960708524695e-67	CD14M_1	C14orf119
3.35447958915111e-71	0.185089	0.142	0.089	8.50394120645699e-67	CD14M_1	RFXANK
3.84709180754852e-71	0.178241	0.149	0.094	9.75276244131625e-67	CD14M_1	NCSTN
3.91166404748469e-71	-0.12092	0.354	0.257	9.91645952677844e-67	CD14M_1	RWDD1
6.80821205874617e-71	-0.103457	0.371	0.273	1.72594983901274e-66	CD14M_1	PAIP2
9.05280519367624e-71	-0.122431	0.489	0.363	2.29497664464886e-66	CD14M_1	NOTCH2
9.67067261214114e-71	-0.108284	0.409	0.3	2.4516122139039e-66	CD14M_1	FCGR2A
1.52108211501407e-70	-1.33273	0.04	0.083	3.85609526977216e-66	CD14M_1	ZNF703
1.89123144731049e-70	-1.73736	0.044	0.086	4.79446084207682e-66	CD14M_1	HERC5
1.92020149067555e-70	-0.111698	0.309	0.222	4.86790279901158e-66	CD14M_1	CCNL1
3.17970390155322e-70	-0.106543	0.451	0.335	8.06086736082757e-66	CD14M_1	RAB5C
3.44658852357865e-70	-0.133676	0.514	0.383	8.73744656612424e-66	CD14M_1	ELF1
5.83384654253044e-70	-0.203233	0.418	0.305	1.47893843699689e-65	CD14M_1	PIK3R5
6.6201141424912e-70	-0.140402	0.51	0.378	1.67826513626295e-65	CD14M_1	SCAF11
6.7879403602053e-70	0.281923	0.064	0.03	1.72081076071564e-65	CD14M_1	SLC22A4
8.80391560123182e-70	0.76744	0.039	0.014	2.23188064406828e-65	CD14M_1	NEDD4L
1.21925356010952e-69	-0.131994	0.395	0.289	3.09092970023365e-65	CD14M_1	STK38
1.32146387490346e-69	0.217395	0.107	0.061	3.35004306926776e-65	CD14M_1	SIRPD
4.00757859056711e-69	-0.137256	0.451	0.332	1.01596124849467e-64	CD14M_1	CALM3
4.03976269469553e-69	0.21769	0.125	0.076	1.02412024073227e-64	CD14M_1	AC100810.1
4.08620932368121e-69	0.163531	0.109	0.063	1.03589492564642e-64	CD14M_1	TMEM43
4.66469422375683e-69	0.278872	0.048	0.02	1.18254663266459e-64	CD14M_1	DGAT2
4.99628185485512e-69	0.103521	0.123	0.074	1.26660741302432e-64	CD14M_1	SEC24C
5.74767805123685e-69	0.171324	0.106	0.061	1.45709386276905e-64	CD14M_1	CYB5R1
5.80692950325141e-69	0.321882	0.089	0.049	1.47211469836926e-64	CD14M_1	SELENON
6.43813194175938e-69	0.422142	0.076	0.039	1.63213082855542e-64	CD14M_1	TP53I3
8.27078204172435e-69	-0.120035	0.234	0.161	2.09672595539754e-64	CD14M_1	RBL2
8.96211850978715e-69	-0.130642	0.32	0.231	2.27198666341614e-64	CD14M_1	CD46
1.1291621229233e-68	0.156388	0.216	0.15	2.86253889782286e-64	CD14M_1	LILRB4
1.17352025824366e-68	0.277728	0.067	0.032	2.97499120667349e-64	CD14M_1	RBMS2
1.21514262917199e-68	0.229926	0.096	0.054	3.08050807921391e-64	CD14M_1	MBD3
1.25277565945276e-68	-0.123452	0.267	0.188	3.17591157427868e-64	CD14M_1	ST8SIA4
1.30202133129724e-68	0.308984	0.064	0.031	3.30075427697164e-64	CD14M_1	FMO5
1.33660262864545e-68	-0.112423	0.264	0.186	3.38842132387909e-64	CD14M_1	MKLN1
1.37480484090981e-68	0.207856	0.141	0.089	3.48526775219046e-64	CD14M_1	TRAF7
1.38056440385941e-68	0.383053	0.076	0.039	3.499868820224e-64	CD14M_1	MMP17
1.41417132978338e-68	0.132705	0.15	0.095	3.58506573813385e-64	CD14M_1	NBEAL1
1.77044158804616e-68	-0.239045	0.504	0.374	4.48824646985582e-64	CD14M_1	ARHGAP15
2.17646685853911e-68	0.103937	0.172	0.114	5.51756113308249e-64	CD14M_1	LLPH
2.40133214366748e-68	0.183812	0.135	0.083	6.08761711741143e-64	CD14M_1	LINGO1
2.47313257433857e-68	-0.187895	0.389	0.284	6.26963838920571e-64	CD14M_1	CDC42SE2
2.62637343370166e-68	-0.124899	0.248	0.173	6.65811929177709e-64	CD14M_1	RGS18
2.63106311125308e-68	-0.155167	0.235	0.162	6.67000809333768e-64	CD14M_1	DYRK1A
2.63613241428762e-68	-0.119756	0.408	0.301	6.68285928346053e-64	CD14M_1	C11orf58
2.70730734476446e-68	-0.11828	0.454	0.337	6.86329484971237e-64	CD14M_1	CAPZA1
4.89109789785188e-68	0.16703	0.077	0.039	1.23994222808443e-63	CD14M_1	TMEM144
5.1965769891343e-68	0.164176	0.141	0.089	1.31738423251544e-63	CD14M_1	PPP1R12C
5.34952497771943e-68	0.251748	0.104	0.059	1.35615807710165e-63	CD14M_1	PCGF3
5.35377947901055e-68	0.122427	0.154	0.099	1.35723663572396e-63	CD14M_1	WBP1
5.49174694671385e-68	0.221217	0.084	0.044	1.39221276846143e-63	CD14M_1	ARRDC4
5.75364073230152e-68	0.115634	0.174	0.116	1.45860546204576e-63	CD14M_1	NDUFAF8
5.86269323094126e-68	0.109488	0.155	0.1	1.48625136097592e-63	CD14M_1	MPV17
6.45258649536699e-68	0.543708	0.056	0.025	1.63579520244049e-63	CD14M_1	FAH
7.51917676036857e-68	0.224023	0.106	0.061	1.90618650052104e-63	CD14M_1	ATPAF2
9.87367113580455e-68	0.143111	0.11	0.064	2.50307436963781e-63	CD14M_1	SEC22B
1.01152015388539e-67	0.257294	0.111	0.066	2.56430474211485e-63	CD14M_1	STK25
1.01456335516135e-67	0.26384	0.09	0.05	2.57201956166955e-63	CD14M_1	MYCL
1.17507211316342e-67	0.128362	0.167	0.11	2.97892531408058e-63	CD14M_1	PHKG2
1.32450131364687e-67	0.200859	0.127	0.077	3.35774328022618e-63	CD14M_1	IRAK1
1.71646509517132e-67	-0.22442	0.978	0.875	4.35141066276881e-63	CD14M_1	MYL6
1.92678990103104e-67	-0.117073	0.292	0.209	4.88460507810379e-63	CD14M_1	PRPF8
2.58775933088134e-67	0.293876	0.086	0.046	6.5602286797173e-63	CD14M_1	PDE4DIP
2.99554659326863e-67	0.139567	0.085	0.045	7.5940101685953e-63	CD14M_1	SEMA3C
3.55087980811854e-67	-4.32325	0.001	0.019	9.00183540156132e-63	CD14M_1	FCGR3B
3.86741701662153e-67	-0.106689	0.271	0.192	9.80428887883725e-63	CD14M_1	FAM174C
4.00341475915135e-67	-0.125477	0.296	0.212	1.01490567559246e-62	CD14M_1	PIK3CD
4.24444876095192e-67	0.191299	0.122	0.074	1.07601020538892e-62	CD14M_1	SDR39U1
6.95566647879777e-67	0.138614	0.141	0.088	1.76333100904002e-62	CD14M_1	NFKB2
7.45090865519295e-67	0.261239	0.064	0.03	1.88887985317796e-62	CD14M_1	FAM117A
9.66512434626446e-67	-0.145854	0.309	0.223	2.4502056730215e-62	CD14M_1	PJA2
1.20504412657485e-66	0.226098	0.082	0.044	3.05490736527991e-62	CD14M_1	KCNE1
1.28456132434207e-66	0.146863	0.082	0.044	3.25649141333957e-62	CD14M_1	FAM198B-AS1
1.43745004930674e-66	-0.110959	0.377	0.278	3.64407961999752e-62	CD14M_1	MMP24OS
1.47173437193758e-66	0.140832	0.118	0.071	3.73099380629895e-62	CD14M_1	SETD7
1.54811992565645e-66	0.391834	0.066	0.032	3.92463882353166e-62	CD14M_1	PALLD
2.3148744871867e-66	0.668305	0.04	0.015	5.868438312467e-62	CD14M_1	ME1
2.31951280996911e-66	-0.107966	0.592	0.441	5.88019692455268e-62	CD14M_1	HNRNPK
2.73536317379138e-66	0.283052	0.07	0.035	6.93441918187853e-62	CD14M_1	C9orf139
2.78913079332393e-66	0.260173	0.079	0.042	7.07072547415549e-62	CD14M_1	TM6SF1
2.79227164777599e-66	0.156204	0.107	0.063	7.0786878542769e-62	CD14M_1	NOTCH1
2.90863648013774e-66	0.265488	0.111	0.066	7.37368434079719e-62	CD14M_1	EPB41L4A-AS1
3.06119891588873e-66	0.461662	0.063	0.03	7.76044537166952e-62	CD14M_1	GPR162
3.73348926628651e-66	0.375168	0.103	0.06	9.46476863896292e-62	CD14M_1	TBC1D12
3.97540558205506e-66	-0.145755	0.665	0.502	1.00780506910678e-61	CD14M_1	FOXP1
4.34815854573275e-66	0.197244	0.148	0.096	1.10230167292871e-61	CD14M_1	PEX16
4.62808985912574e-66	-0.125745	0.239	0.166	1.17326706018697e-61	CD14M_1	MARCH7
5.3368896434937e-66	-0.173126	0.446	0.331	1.35295489352209e-61	CD14M_1	MCTP1
6.27202914434729e-66	0.363861	0.06	0.028	1.59002210838348e-61	CD14M_1	TEX2
6.51009542975566e-66	-0.11352	0.277	0.197	1.65037429239736e-61	CD14M_1	PTPRA
7.44077857669782e-66	0.462435	0.076	0.04	1.88631177697866e-61	CD14M_1	MGAT4B
7.54734140945518e-66	0.10787	0.146	0.093	1.91332652071098e-61	CD14M_1	BCL2L13
7.64613557083816e-66	0.987123	0.029	0.009	1.93837182856318e-61	CD14M_1	ALOX15B
8.16232839339148e-66	0.242031	0.093	0.052	2.06923187100867e-61	CD14M_1	CLPB
1.08274981722288e-65	-0.136937	0.303	0.218	2.74487906164173e-61	CD14M_1	DOCK11
1.79989425387918e-65	0.151671	0.118	0.071	4.5629119230091e-61	CD14M_1	TTC37
1.94156242453125e-65	0.269383	0.104	0.061	4.92205490242917e-61	CD14M_1	RAB9A
2.00806694209453e-65	-0.121334	0.249	0.175	5.09065050490384e-61	CD14M_1	EHMT1
2.01040451947186e-65	0.214348	0.107	0.063	5.0965764973131e-61	CD14M_1	SRD5A1
2.21263123743823e-65	-0.119443	0.375	0.278	5.60924145002966e-61	CD14M_1	CASP4
2.82184976454651e-65	0.263639	0.112	0.067	7.15367133810186e-61	CD14M_1	GGCT
3.23612018082339e-65	0.112851	0.137	0.086	8.20388827040539e-61	CD14M_1	REEP4
3.37968495805723e-65	-0.142003	0.282	0.201	8.56783933717089e-61	CD14M_1	TRAPPC9
3.50687855176203e-65	-0.117156	0.253	0.179	8.89028781657193e-61	CD14M_1	FOXN2
3.892794179744e-65	-2.37017	0.008	0.033	9.86862252506901e-61	CD14M_1	PRR5L
4.41622897433441e-65	0.207724	0.115	0.07	1.11955820728352e-60	CD14M_1	RNF40
5.56544669291645e-65	0.290813	0.09	0.05	1.41089639112125e-60	CD14M_1	CHPF2
5.80797311802358e-65	-0.135244	0.241	0.168	1.47237926515016e-60	CD14M_1	ATF7IP
6.40438582915088e-65	0.245539	0.088	0.049	1.62357585154804e-60	CD14M_1	ASB13
6.80328741166523e-65	0.119509	0.139	0.088	1.72470139173125e-60	CD14M_1	PTPMT1
7.15054839701696e-65	0.398537	0.067	0.034	1.81273552412777e-60	CD14M_1	CHST13
7.67742632397562e-65	0.13435	0.087	0.048	1.94630434739106e-60	CD14M_1	KLHL36
8.81231272376398e-65	-0.15763	0.312	0.226	2.23400939860141e-60	CD14M_1	HERPUD1
9.7376850942473e-65	-0.145122	0.543	0.406	2.46860054824263e-60	CD14M_1	TBCA
1.09952520721181e-64	-0.152849	0.412	0.307	2.78740635280266e-60	CD14M_1	SPCS1
1.16707035599969e-64	0.127683	0.106	0.062	2.95864005949482e-60	CD14M_1	PHKA2
1.18253337116795e-64	0.278854	0.089	0.049	2.99784034924786e-60	CD14M_1	SUN1
1.37615823549056e-64	0.238634	0.117	0.071	3.48869874279213e-60	CD14M_1	ECSIT
1.49804134432976e-64	0.103168	0.115	0.069	3.79768461201038e-60	CD14M_1	NUCB2
1.5658925421209e-64	0.342241	0.082	0.044	3.9696941835307e-60	CD14M_1	PCED1A
2.38568389882798e-64	0.296625	0.074	0.039	6.0479472519188e-60	CD14M_1	AC127502.2
2.67756600524531e-64	0.221247	0.076	0.04	6.7878975798974e-60	CD14M_1	RCN3
2.86731876064031e-64	-0.169637	0.31	0.224	7.26893979009925e-60	CD14M_1	VTI1A
3.05705102586287e-64	0.104724	0.147	0.094	7.74993005566497e-60	CD14M_1	HCFC1
3.11843168618638e-64	-0.120046	0.469	0.348	7.90553616765109e-60	CD14M_1	GIMAP4
3.32508285449621e-64	0.23585	0.088	0.049	8.42941754443333e-60	CD14M_1	FRAT1
3.42514689687847e-64	0.108625	0.175	0.118	8.68308989827661e-60	CD14M_1	INTS11
3.49290590978135e-64	0.127764	0.135	0.085	8.85486577188669e-60	CD14M_1	MTHFR
4.05630283684433e-64	0.139312	0.158	0.105	1.0283133321684e-59	CD14M_1	HIKESHI
4.2174532424445e-64	-0.118127	0.339	0.25	1.06916657149211e-59	CD14M_1	RIOK3
4.22820073433557e-64	-0.126172	0.572	0.428	1.07189116816141e-59	CD14M_1	MAP3K1
5.12854991673013e-64	0.119653	0.137	0.087	1.30013868939026e-59	CD14M_1	C6orf89
6.32915917218952e-64	0.124287	0.119	0.073	1.60450514174177e-59	CD14M_1	PDPR
7.29258696395862e-64	0.118831	0.127	0.079	1.84874372123315e-59	CD14M_1	SIGLEC7
7.38659208637809e-64	-0.118338	0.256	0.181	1.87257495981771e-59	CD14M_1	LARP4B
7.75376018343075e-64	0.11441	0.087	0.048	1.96565574410153e-59	CD14M_1	SMIM3
8.13833962423696e-64	-0.160582	0.413	0.306	2.06315047814031e-59	CD14M_1	NCOA2
9.58085930960521e-64	-4.5123	0.001	0.02	2.42884364357802e-59	CD14M_1	ENHO
9.82944230437112e-64	0.138866	0.141	0.09	2.49186191858112e-59	CD14M_1	POR
1.02994479400774e-63	0.21249	0.115	0.069	2.61101304728902e-59	CD14M_1	NEU1
1.06435956403851e-63	-0.185573	0.458	0.343	2.69825793079403e-59	CD14M_1	SF1
1.15851683941511e-63	0.134438	0.118	0.072	2.93695603960124e-59	CD14M_1	LRRC58
1.20974845329719e-63	0.121632	0.12	0.073	3.06683330395371e-59	CD14M_1	KIAA2013
1.2577819101535e-63	-0.112864	0.469	0.353	3.18860292043015e-59	CD14M_1	PAK1
1.27547598291333e-63	-0.18674	0.267	0.19	3.23345916428359e-59	CD14M_1	TNFAIP8
1.43628821920446e-63	0.324473	0.053	0.024	3.64113426450524e-59	CD14M_1	ECHDC3
1.44381964360791e-63	0.294586	0.089	0.05	3.66022717851041e-59	CD14M_1	COMTD1
1.44835656036372e-63	-0.155237	0.372	0.276	3.67172871617808e-59	CD14M_1	NR3C1
1.48679251643913e-63	-0.120042	0.532	0.398	3.76916770842483e-59	CD14M_1	IFNGR2
1.56117950014563e-63	0.180555	0.105	0.062	3.95774615081918e-59	CD14M_1	CWF19L1
1.57409300829457e-63	0.371967	0.059	0.028	3.99048318532757e-59	CD14M_1	PCNX2
1.58316640661324e-63	0.155181	0.105	0.062	4.01348515740523e-59	CD14M_1	GEMIN7
1.73357024727597e-63	0.273554	0.093	0.053	4.39477393386931e-59	CD14M_1	AC007952.4
2.25699623639417e-63	-0.209972	0.126	0.076	5.72171115888285e-59	CD14M_1	SEPTIN1
2.37484034484065e-63	0.231359	0.137	0.088	6.02045775820553e-59	CD14M_1	STAC3
2.4055926268021e-63	0.1808	0.092	0.052	6.098417868206e-59	CD14M_1	UBN2
2.42468358349717e-63	0.163	0.101	0.059	6.14681535252368e-59	CD14M_1	DMAP1
3.02028480763593e-63	0.316776	0.083	0.045	7.65672401583785e-59	CD14M_1	SFXN3
3.11566942576642e-63	0.393248	0.066	0.033	7.89853356126044e-59	CD14M_1	SLC18B1
4.21608754630076e-63	0.525427	0.064	0.031	1.06882035386271e-58	CD14M_1	SAMD1
4.62674595262992e-63	-0.114131	0.365	0.271	1.17292636645121e-58	CD14M_1	HNRNPF
5.88212989978225e-63	0.161066	0.102	0.06	1.4911787508938e-58	CD14M_1	GPAT4
7.30532452691399e-63	0.199066	0.104	0.061	1.85197282081797e-58	CD14M_1	NELFB
7.45401399192231e-63	-0.112332	0.342	0.253	1.88966708709222e-58	CD14M_1	ZC3H15
7.88137583305202e-63	-0.175161	0.327	0.238	1.99800758743702e-58	CD14M_1	TMEM154
9.77671514749329e-63	0.100474	0.133	0.084	2.47849505704102e-58	CD14M_1	TMEM167B
1.0479581776773e-62	-0.119989	0.22	0.153	2.65667877622972e-58	CD14M_1	PRDM2
1.0788877816953e-62	0.130558	0.154	0.101	2.73508841537575e-58	CD14M_1	GTF2H5
1.10877297128262e-62	0.116152	0.141	0.09	2.81085035949858e-58	CD14M_1	CBX6
1.12930819185691e-62	0.10957	0.116	0.07	2.86290919717645e-58	CD14M_1	ZYG11B
1.32426040974517e-62	-0.120046	0.273	0.196	3.35713256474499e-58	CD14M_1	CIR1
1.66361188533045e-62	-0.213043	0.142	0.088	4.21742249050122e-58	CD14M_1	AQP9
1.66890029815556e-62	0.105229	0.146	0.094	4.23082914585417e-58	CD14M_1	MXD4
1.79256534929656e-62	0.287594	0.091	0.052	4.54433241700171e-58	CD14M_1	MRPL45
2.90647146881281e-62	-0.164823	0.328	0.24	7.36819582058736e-58	CD14M_1	TCF12
3.0914554602789e-62	0.238873	0.077	0.041	7.83714873735303e-58	CD14M_1	HMGCR
4.25803930935277e-62	-0.130954	0.249	0.177	1.07945554531402e-57	CD14M_1	TMEM131
5.10141414062486e-62	0.152889	0.076	0.04	1.29325949878981e-57	CD14M_1	FNTB
6.43889809378513e-62	0.153914	0.113	0.068	1.63232505575547e-57	CD14M_1	KDM5C
7.30344467743106e-62	-1.62754	0.032	0.068	1.85149626017555e-57	CD14M_1	CHST2
7.44073886016346e-62	0.211307	0.106	0.063	1.88630170844004e-57	CD14M_1	NCKAP5L
8.55613216100374e-62	-0.146086	0.252	0.178	2.16906506413606e-57	CD14M_1	PPP2R5C
8.84738346233771e-62	0.259561	0.065	0.032	2.24290018153723e-57	CD14M_1	SOCS3
1.25583776978419e-61	-0.116429	0.318	0.235	3.1836743301799e-57	CD14M_1	STX7
1.33942863161621e-61	-0.107365	0.235	0.165	3.39558552401025e-57	CD14M_1	DAPP1
1.39362429397749e-61	-0.154104	0.277	0.199	3.53297694766233e-57	CD14M_1	PITPNC1
1.5092384469169e-61	0.483627	0.057	0.027	3.82607038677903e-57	CD14M_1	AC108134.3
1.71816726651533e-61	0.127032	0.094	0.053	4.35572583734301e-57	CD14M_1	CCDC170
1.835538281367e-61	0.154664	0.087	0.048	4.65327309709349e-57	CD14M_1	RPGR
2.09061656447617e-61	0.101424	0.108	0.064	5.29992205260354e-57	CD14M_1	INTS8
2.4092816991941e-61	0.1299	0.119	0.073	6.10777003562697e-57	CD14M_1	ACBD3
2.8913864914137e-61	-1.46699	0.025	0.058	7.32995389438287e-57	CD14M_1	AC064805.1
3.02533163145795e-61	-4.0295	0.001	0.019	7.66951821890904e-57	CD14M_1	GUCY1B1
3.20989160547663e-61	0.160793	0.098	0.057	8.1373962090438e-57	CD14M_1	BHLHE40
3.37632193097802e-61	0.163115	0.106	0.063	8.55931372722239e-57	CD14M_1	ZMIZ2
3.55210256018561e-61	-0.152773	0.227	0.158	9.00493520032655e-57	CD14M_1	FNDC3A
4.02124170785708e-61	-0.253053	0.294	0.208	1.01942498535885e-56	CD14M_1	ATP2B1-AS1
4.17434018024986e-61	-0.165237	0.318	0.234	1.05823697909514e-56	CD14M_1	CDC42SE1
5.1707742441756e-61	0.166295	0.107	0.064	1.31084297864096e-56	CD14M_1	USE1
6.08896340042889e-61	0.107101	0.155	0.103	1.54361311164273e-56	CD14M_1	KLHDC3
6.2960823929545e-61	-0.109649	0.392	0.295	1.5961198474379e-56	CD14M_1	PTPN18
6.43477575966834e-61	0.109147	0.09	0.051	1.63128000283352e-56	CD14M_1	MPRIP
6.77715413160866e-61	0.444832	0.06	0.029	1.71807634390411e-56	CD14M_1	SLC26A6
6.79585184601786e-61	-0.137052	0.276	0.199	1.72281640148399e-56	CD14M_1	YTHDC1
6.91203665655081e-61	0.133014	0.087	0.049	1.7522704128022e-56	CD14M_1	MLLT6
9.76321826726843e-61	0.122842	0.13	0.083	2.47507346293522e-56	CD14M_1	TAZ
1.06239316830016e-60	-0.117652	0.265	0.19	2.69327292095775e-56	CD14M_1	TRIM38
1.26486560074782e-60	-0.125535	0.386	0.29	3.20656078445581e-56	CD14M_1	RB1
1.30529202981956e-60	-0.136155	0.263	0.19	3.30904582479558e-56	CD14M_1	MAX
2.06788446938844e-60	0.217022	0.107	0.064	5.24229391834664e-56	CD14M_1	NKAPD1
2.13845582260584e-60	0.136146	0.129	0.082	5.42119935588806e-56	CD14M_1	BRAT1
2.5643617342055e-60	-0.131563	0.323	0.238	6.50091343238436e-56	CD14M_1	CERT1
2.79264595502243e-60	0.100955	0.121	0.076	7.07963676057736e-56	CD14M_1	DGAT1
3.2366690770599e-60	-0.135827	0.306	0.226	8.20527977725454e-56	CD14M_1	TRAM1
3.59154978840538e-60	0.194127	0.121	0.076	9.10493786858648e-56	CD14M_1	SLC31A1
3.81076789831859e-60	0.157759	0.075	0.04	9.66067769902745e-56	CD14M_1	AC015871.1
3.86972938291141e-60	0.138097	0.073	0.039	9.81015095861872e-56	CD14M_1	AP002381.2
4.59057851667262e-60	0.157657	0.122	0.076	1.16375755976168e-55	CD14M_1	XAB2
4.92323177998814e-60	-0.119665	0.333	0.248	1.24808848854479e-55	CD14M_1	UBE2L3
5.07287380984645e-60	-0.126725	0.564	0.423	1.28602423953417e-55	CD14M_1	TOMM6
5.94149116654222e-60	0.106954	0.071	0.037	1.50622742563012e-55	CD14M_1	MAP2K6
6.15466421817446e-60	0.253788	0.065	0.033	1.56026892594941e-55	CD14M_1	ABCC5
7.20278686306121e-60	-0.162253	0.323	0.237	1.82597849765465e-55	CD14M_1	TLE4
7.58222116574531e-60	0.120356	0.124	0.078	1.92216888772809e-55	CD14M_1	ZCCHC10
7.6409739533529e-60	-0.158001	0.334	0.247	1.93706330691449e-55	CD14M_1	NCOA3
7.79602912752422e-60	0.142387	0.123	0.077	1.97637134411867e-55	CD14M_1	C5orf24
1.39254603540929e-59	0.109926	0.121	0.075	3.53024345436608e-55	CD14M_1	MAP2K7
1.48385313940464e-59	0.162076	0.117	0.073	3.7617160937047e-55	CD14M_1	EDEM2
1.49086557248964e-59	0.112714	0.142	0.092	3.77949331281848e-55	CD14M_1	ZBTB7B
1.5474541119804e-59	-0.110477	0.348	0.26	3.92295091928151e-55	CD14M_1	CIAO2B
1.98568454595512e-59	-0.178978	0.512	0.382	5.03390889245082e-55	CD14M_1	CD55
2.28311777736758e-59	-2.44247	0.006	0.028	5.78793187740455e-55	CD14M_1	CASP5
2.41887308584758e-59	0.665924	0.032	0.011	6.13208515993219e-55	CD14M_1	AZU1
2.43755356022179e-59	0.183994	0.094	0.055	6.17944203051827e-55	CD14M_1	TMEM104
2.58020160697573e-59	0.247706	0.091	0.052	6.54106909384417e-55	CD14M_1	H6PD
2.63885332405754e-59	0.136232	0.13	0.083	6.68975706181827e-55	CD14M_1	JAGN1
2.83108658515131e-59	-2.99163	0.004	0.023	7.1770876020171e-55	CD14M_1	PRR5
3.03741510324559e-59	0.498699	0.042	0.018	7.7001510282379e-55	CD14M_1	VEGFA
3.71716162099644e-59	-0.116428	0.103	0.06	9.42337642538809e-55	CD14M_1	PAM
3.8411141403593e-59	-0.119836	0.281	0.203	9.73760845722487e-55	CD14M_1	RTN1
4.73627866923618e-59	0.326899	0.047	0.021	1.20069400543806e-54	CD14M_1	GDPD5
5.42324261493284e-59	-0.183703	0.44	0.329	1.37484623531163e-54	CD14M_1	WIPF1
5.64360374217374e-59	0.102957	0.109	0.066	1.43070998467847e-54	CD14M_1	MED25
7.3013686006188e-59	-0.115777	0.364	0.273	1.85096995394287e-54	CD14M_1	BAZ1A
7.45577814310083e-59	-0.108693	0.207	0.144	1.89011431705749e-54	CD14M_1	RNF111
8.0908184480652e-59	0.501963	0.069	0.036	2.05110338476901e-54	CD14M_1	TUBB6
8.18701241355236e-59	-0.112279	0.421	0.318	2.07548951695966e-54	CD14M_1	MOB1A
8.55084077059564e-59	0.121796	0.076	0.041	2.1677236437537e-54	CD14M_1	CTIF
1.12782365149156e-58	-0.112253	0.164	0.109	2.85914573889625e-54	CD14M_1	CHIC2
1.17945603466433e-58	0.150958	0.11	0.067	2.99003899347755e-54	CD14M_1	RNF41
1.2610971238201e-58	0.233631	0.117	0.073	3.19700731859634e-54	CD14M_1	MARCO
1.47255989397456e-58	0.300888	0.068	0.036	3.7330865872149e-54	CD14M_1	CCDC200
1.5564046776763e-58	-0.119253	0.582	0.439	3.94564149837718e-54	CD14M_1	GUK1
1.59858436265093e-58	-0.149724	0.507	0.38	4.05257121775637e-54	CD14M_1	HSP90B1
2.10973249811761e-58	-0.13127	0.432	0.326	5.34838285597797e-54	CD14M_1	RNF13
2.11479932837658e-58	0.109116	0.145	0.096	5.36122777736748e-54	CD14M_1	STOML2
2.71633046725396e-58	0.215983	0.112	0.069	6.8861693675355e-54	CD14M_1	MRPL58
2.75054938238067e-58	0.40157	0.052	0.024	6.97291773927323e-54	CD14M_1	FUT7
2.78696022567933e-58	0.145695	0.126	0.08	7.06522286811966e-54	CD14M_1	SEPHS2
3.06440459207313e-58	0.17403	0.116	0.072	7.76857208136459e-54	CD14M_1	ARL8A
3.24927461830717e-58	0.310382	0.069	0.036	8.2372360848705e-54	CD14M_1	ARHGAP10
3.63857969979678e-58	0.150963	0.14	0.091	9.22416339695482e-54	CD14M_1	WDR13
4.21569182881926e-58	0.163325	0.136	0.088	1.06872003552397e-53	CD14M_1	ELOF1
4.45386426688118e-58	-0.226176	0.994	0.928	1.12909913029705e-53	CD14M_1	IFI30
4.79966434157876e-58	0.123073	0.148	0.098	1.21676290723363e-53	CD14M_1	RPL7L1
5.24144417199995e-58	0.100521	0.108	0.066	1.32875851204371e-53	CD14M_1	MCFD2
5.74583635781027e-58	-0.134911	0.348	0.261	1.45662697506848e-53	CD14M_1	SSU72
6.13752186654431e-58	-0.123648	0.454	0.342	1.55592316838765e-53	CD14M_1	IL10RA
6.29219962871324e-58	-0.108037	0.276	0.202	1.59513552787509e-53	CD14M_1	IK
7.05564314391737e-58	0.281439	0.07	0.037	1.78867609341449e-53	CD14M_1	KMT2B
7.2615927263291e-58	-0.111897	0.239	0.171	1.84088637205169e-53	CD14M_1	GPBP1
8.73733817204216e-58	-0.128752	0.274	0.2	2.21500259999441e-53	CD14M_1	TBC1D1
1.03965862373708e-57	0.331867	0.062	0.031	2.63563857703586e-53	CD14M_1	TGIF1
1.07711951301802e-57	0.128386	0.108	0.066	2.73060567745199e-53	CD14M_1	TMCO3
1.14412492449709e-57	0.369226	0.061	0.03	2.90047109609257e-53	CD14M_1	SGSM2
1.15064585840152e-57	0.145507	0.099	0.059	2.9170023156337e-53	CD14M_1	ZNF316
1.27218788357048e-57	0.23813	0.088	0.051	3.22512350363952e-53	CD14M_1	MILR1
1.59042704200662e-57	0.107435	0.099	0.058	4.03189159419097e-53	CD14M_1	SLC46A2
1.59309345836442e-57	-0.105367	0.239	0.171	4.03865122629964e-53	CD14M_1	DNAJB6
1.6742101792733e-57	0.532275	0.036	0.014	4.24429022547574e-53	CD14M_1	LGALS12
1.76026423604901e-57	-0.11254	0.337	0.252	4.46244586480784e-53	CD14M_1	TMEM179B
1.87463532714574e-57	-0.130632	0.264	0.192	4.75238801784717e-53	CD14M_1	SMG1
2.11465593377342e-57	-1.20207	0.071	0.115	5.36086425770899e-53	CD14M_1	GBP4
2.16796941083574e-57	-6.70626	0	0.016	5.4960192534097e-53	CD14M_1	C1QB
2.45091487205628e-57	0.175068	0.114	0.071	6.21331429214988e-53	CD14M_1	MAN1B1
2.69153388871052e-57	0.18278	0.076	0.042	6.82330756127005e-53	CD14M_1	EAF1
2.77358677177574e-57	-1.07823	0.351	0.363	7.03131982512868e-53	CD14M_1	KLF2
2.88468444886442e-57	-0.155995	0.199	0.137	7.31296354631619e-53	CD14M_1	SMG7
2.95382570469461e-57	-0.100303	0.209	0.146	7.4882435439713e-53	CD14M_1	NSRP1
3.00439360326693e-57	-0.131648	0.224	0.159	7.616438223642e-53	CD14M_1	TAB2
3.21738305804969e-57	0.242838	0.096	0.057	8.15638779046176e-53	CD14M_1	FEM1B
3.73803786708764e-57	0.220933	0.107	0.066	9.47629979685388e-53	CD14M_1	RPP25L
4.02175774692451e-57	0.191228	0.1	0.06	1.01955580642283e-52	CD14M_1	NBPF12
4.05054751758997e-57	-0.104345	0.237	0.171	1.02685430118423e-52	CD14M_1	CNOT2
4.08101871589199e-57	-0.100056	0.209	0.147	1.03457905466578e-52	CD14M_1	XPO6
4.21763041673154e-57	-0.106527	0.203	0.142	1.06921148694561e-52	CD14M_1	MGRN1
4.34758394673449e-57	-0.14862	0.4	0.298	1.10215600633666e-52	CD14M_1	NINJ1
4.43803764447629e-57	0.160198	0.123	0.078	1.12508692325118e-52	CD14M_1	GNPAT
4.51844808382744e-57	0.135911	0.093	0.054	1.1454717737311e-52	CD14M_1	CREB3L2
4.72300134456504e-57	-0.141755	0.39	0.293	1.19732807086068e-52	CD14M_1	TMEM50A
4.75940491567445e-57	-0.139758	0.25	0.181	1.20655674017263e-52	CD14M_1	ABI1
4.76177539956867e-57	-0.118314	0.194	0.134	1.20715768154465e-52	CD14M_1	CNOT4
5.08530415056592e-57	0.185754	0.103	0.063	1.28917545520997e-52	CD14M_1	DUSP18
5.89428255782537e-57	-0.118172	0.26	0.19	1.49425957123431e-52	CD14M_1	EAPP
6.8838016956468e-57	0.913479	0.021	0.005	1.74511256786342e-52	CD14M_1	SERPINB10
7.37913614070615e-57	-0.153356	0.495	0.373	1.87068480303042e-52	CD14M_1	C4orf3
7.43640696688416e-57	0.141252	0.089	0.051	1.8852035301748e-52	CD14M_1	SLC11A2
8.31263880214931e-57	-0.137737	0.221	0.156	2.10733706273287e-52	CD14M_1	SESTD1
9.05146535099211e-57	-3.29629	0.007	0.028	2.29463698113001e-52	CD14M_1	TUBB1
9.35514873793276e-57	-0.151415	0.455	0.345	2.37162375655333e-52	CD14M_1	LSM7
1.14224701011797e-56	-0.170636	0.36	0.268	2.89571039535007e-52	CD14M_1	H1FX
1.16311482663635e-56	-0.100308	0.105	0.063	2.94861239700582e-52	CD14M_1	MGAT4A
1.2688990036447e-56	-0.210879	0.329	0.243	3.21678586413969e-52	CD14M_1	CPQ
1.30347803472614e-56	-0.139801	0.6	0.452	3.30444716583423e-52	CD14M_1	ATP5MD
1.3982287388909e-56	0.100957	0.145	0.096	3.54464967596233e-52	CD14M_1	OXLD1
1.4588988529848e-56	-0.143021	0.323	0.24	3.69845448220177e-52	CD14M_1	PPP1CB
1.52809226303817e-56	0.236018	0.087	0.05	3.87386669602807e-52	CD14M_1	SLC4A2
1.72343153047721e-56	0.334426	0.075	0.041	4.36907127291278e-52	CD14M_1	CLEC11A
1.75358419672927e-56	0.105873	0.139	0.091	4.44551129712836e-52	CD14M_1	DOK1
1.81056985054193e-56	0.174072	0.087	0.05	4.58997562810885e-52	CD14M_1	MARK4
1.81310239202548e-56	0.174326	0.099	0.059	4.59639587402379e-52	CD14M_1	PLA2G4A
1.87772839262884e-56	0.105734	0.116	0.072	4.76022924815336e-52	CD14M_1	FAM102B
2.18426960423728e-56	0.372668	0.066	0.034	5.53734187370193e-52	CD14M_1	PI4K2A
2.84592087756678e-56	0.104209	0.109	0.067	7.21469401671954e-52	CD14M_1	TULP4
3.25984318408024e-56	0.115201	0.142	0.094	8.26402845596182e-52	CD14M_1	NUBP2
3.33742882636318e-56	0.146124	0.105	0.064	8.46071581771329e-52	CD14M_1	GATAD1
[truncated: 69,569 more rows]

## Sheet: pbmc.b.lymphoidL2.markers
p_val	avg_log2FC	pct.1	pct.2	p_val_adj	cluster	gene
[truncated: 31,953 more rows]
