# Supplementary material for: Maintenance of chronic neuroinflammation in multiple sclerosis via interferon signaling and CD8 T cell-mediated cytotoxicity
Source: bioRxiv preprint, doi:10.1101/2025.06.09.658729, version 1 (2025-06-11)
Supplement: Supplementary File 4 [file 658729_file07.xlsx]

## Sheet: csfL1.labelL2.markers.atresL1
p_val	avg_log2FC	pct.1	pct.2	p_val_adj	cluster	gene
0	1.82333	0.888	0.416	0	CD4 TCM	LTB
0	1.23492	0.833	0.378	0	CD4 TCM	IL7R
0	-4.4751	0.202	0.628	0	CD4 TCM	HLA-DPB1
0	-4.62832	0.202	0.627	0	CD4 TCM	HLA-DPA1
0	-5.98574	0.091	0.499	0	CD4 TCM	HLA-DRA
0	-4.72884	0.142	0.547	0	CD4 TCM	HLA-DRB1
0	-6.30343	0.027	0.428	0	CD4 TCM	TYROBP
0	1.58486	0.647	0.25	0	CD4 TCM	INPP4B
0	1.54416	0.622	0.233	0	CD4 TCM	FLT3LG
0	2.1076	0.531	0.143	0	CD4 TCM	AQP3
0	0.760228	0.793	0.415	0	CD4 TCM	CD3D
0	0.650771	0.91	0.535	0	CD4 TCM	CD3E
0	2.46105	0.448	0.08	0	CD4 TCM	MAL
0	0.553475	0.917	0.55	0	CD4 TCM	IL32
0	1.09536	0.654	0.303	0	CD4 TCM	SPOCK2
0	0.993411	0.919	0.572	0	CD4 TCM	CD52
0	-6.46562	0.046	0.393	0	CD4 TCM	CST3
0	1.28045	0.65	0.305	0	CD4 TCM	NOSIP
0	0.782801	0.687	0.345	0	CD4 TCM	CD3G
0	-6.40514	0.014	0.351	0	CD4 TCM	FCER1G
0	0.713152	0.89	0.56	0	CD4 TCM	IFITM1
0	0.57603	0.768	0.449	0	CD4 TCM	CD2
0	0.757077	0.696	0.378	0	CD4 TCM	LIME1
0	0.670671	0.727	0.412	0	CD4 TCM	LCK
0	-4.61855	0.069	0.384	0	CD4 TCM	NKG7
0	2.34588	0.378	0.063	0	CD4 TCM	CD40LG
0	-5.70823	0.035	0.347	0	CD4 TCM	AIF1
0	-4.73546	0.069	0.38	0	CD4 TCM	HLA-DRB5
0	0.793336	0.672	0.362	0	CD4 TCM	GIMAP5
0	0.819136	0.662	0.357	0	CD4 TCM	LINC00861
0	0.841223	0.814	0.511	0	CD4 TCM	CRIP1
0	0.67197	0.819	0.518	0	CD4 TCM	GIMAP7
0	1.50996	0.463	0.164	0	CD4 TCM	PRKCQ-AS1
0	1.11973	0.68	0.383	0	CD4 TCM	ITGB1
0	0.858135	0.778	0.481	0	CD4 TCM	TLE5
0	0.706808	0.765	0.472	0	CD4 TCM	KLF2
0	0.559313	0.811	0.518	0	CD4 TCM	IL2RG
0	1.03088	0.578	0.285	0	CD4 TCM	TMEM123
0	0.929159	0.58	0.287	0	CD4 TCM	LAT
0	0.720137	0.727	0.437	0	CD4 TCM	TRAF3IP3
0	-5.92126	0.022	0.31	0	CD4 TCM	HLA-DQA1
0	1.00871	0.756	0.472	0	CD4 TCM	ARHGAP15
0	1.4542	0.43	0.147	0	CD4 TCM	LEF1
0	1.2079	0.492	0.211	0	CD4 TCM	TCF7
0	0.839119	0.654	0.374	0	CD4 TCM	RIPOR2
0	-4.29297	0.049	0.328	0	CD4 TCM	HLA-DMA
0	1.01358	0.866	0.587	0	CD4 TCM	LDHB
0	0.709841	0.623	0.345	0	CD4 TCM	CD247
0	0.989005	0.54	0.262	0	CD4 TCM	BCL11B
0	0.991356	0.558	0.281	0	CD4 TCM	ADD3
0	1.22682	0.453	0.177	0	CD4 TCM	RCAN3
0	0.689951	0.78	0.505	0	CD4 TCM	PCED1B-AS1
0	0.631822	0.647	0.376	0	CD4 TCM	SKAP1
0	1.69481	0.398	0.129	0	CD4 TCM	CISH
0	-2.21187	0.193	0.462	0	CD4 TCM	GZMK
0	1.27842	0.447	0.178	0	CD4 TCM	PLSCR3
0	1.11531	0.482	0.214	0	CD4 TCM	PIM1
0	-3.93221	0.093	0.352	0	CD4 TCM	HLA-DQB1
0	1.22863	0.423	0.164	0	CD4 TCM	CD6
0	0.648847	0.575	0.317	0	CD4 TCM	SYNE2
0	0.979703	0.47	0.214	0	CD4 TCM	SIT1
0	1.64549	0.373	0.117	0	CD4 TCM	TESPA1
0	1.23302	0.436	0.181	0	CD4 TCM	TRADD
0	0.673417	0.662	0.409	0	CD4 TCM	CCND3
0	0.49865	0.642	0.389	0	CD4 TCM	TRBC2
0	0.535343	0.739	0.487	0	CD4 TCM	EVL
0	1.04995	0.404	0.153	0	CD4 TCM	CD4
0	1.21022	0.432	0.181	0	CD4 TCM	DGKA
0	0.681268	0.768	0.518	0	CD4 TCM	GSTK1
0	0.540327	0.539	0.29	0	CD4 TCM	SELL
0	0.858225	0.487	0.238	0	CD4 TCM	CAMK4
0	-4.70225	0.02	0.266	0	CD4 TCM	CD8A
0	1.23153	0.389	0.143	0	CD4 TCM	CCR7
0	0.587878	0.809	0.564	0	CD4 TCM	FYB1
0	-4.52551	0.014	0.259	0	CD4 TCM	KLRK1
0	0.568747	0.755	0.511	0	CD4 TCM	C12orf57
0	0.705857	0.617	0.373	0	CD4 TCM	PLP2
0	0.554698	0.597	0.356	0	CD4 TCM	ETS1
0	0.835856	0.45	0.21	0	CD4 TCM	RGCC
0	0.573008	0.591	0.351	0	CD4 TCM	LEPROTL1
0	1.15783	0.443	0.203	0	CD4 TCM	RORA
0	0.772255	0.505	0.268	0	CD4 TCM	TUBA4A
0	0.630166	0.519	0.283	0	CD4 TCM	ITM2A
0	1.02233	0.458	0.222	0	CD4 TCM	TTC39C
0	1.15589	0.466	0.23	0	CD4 TCM	BCL2
0	0.662882	0.59	0.354	0	CD4 TCM	SEPTIN9
0	0.778567	0.568	0.332	0	CD4 TCM	TNFAIP8
0	0.619401	0.66	0.425	0	CD4 TCM	ANKRD12
0	0.859286	0.45	0.216	0	CD4 TCM	S1PR1
0	-3.5184	0.032	0.264	0	CD4 TCM	AOAH
0	0.520255	0.729	0.497	0	CD4 TCM	CD48
0	0.777022	0.485	0.253	0	CD4 TCM	TRAC
0	0.507595	0.682	0.453	0	CD4 TCM	CNN2
0	1.07907	0.418	0.189	0	CD4 TCM	OXNAD1
0	0.574789	0.573	0.344	0	CD4 TCM	ACAP1
0	0.540173	0.549	0.321	0	CD4 TCM	ISG20
0	0.377229	0.919	0.693	0	CD4 TCM	TXNIP
0	1.71694	0.337	0.111	0	CD4 TCM	SERINC5
0	-4.39626	0.019	0.245	0	CD4 TCM	CD8B
0	0.555987	0.57	0.344	0	CD4 TCM	ANXA6
0	0.636004	0.539	0.314	0	CD4 TCM	ABRACL
0	0.561038	0.583	0.358	0	CD4 TCM	ICAM3
0	0.749327	0.516	0.292	0	CD4 TCM	TAGAP
0	-6.48157	0.007	0.229	0	CD4 TCM	SPI1
0	-3.65424	0.03	0.251	0	CD4 TCM	PLEK
0	0.803336	0.484	0.263	0	CD4 TCM	PCED1B
0	0.565113	0.551	0.331	0	CD4 TCM	TBC1D10C
0	0.660317	0.598	0.378	0	CD4 TCM	IKZF1
0	0.424757	0.756	0.536	0	CD4 TCM	LIMD2
0	0.948084	0.426	0.208	0	CD4 TCM	ICAM2
0	0.670085	0.607	0.389	0	CD4 TCM	ITGA4
0	0.467596	0.71	0.492	0	CD4 TCM	ARL6IP5
0	0.707055	0.482	0.264	0	CD4 TCM	RHOH
0	0.792992	0.497	0.279	0	CD4 TCM	CORO1B
0	0.638584	0.49	0.272	0	CD4 TCM	PRDX2
0	0.369401	0.829	0.611	0	CD4 TCM	PPDPF
0	0.540501	0.543	0.326	0	CD4 TCM	CLEC2D
0	-6.76431	0.012	0.228	0	CD4 TCM	C1QC
0	0.345139	0.959	0.743	0	CD4 TCM	MT-CYB
0	0.61658	0.525	0.31	0	CD4 TCM	MCUB
0	0.428223	0.507	0.292	0	CD4 TCM	CD27
0	0.586881	0.536	0.321	0	CD4 TCM	SELPLG
0	0.495882	0.67	0.455	0	CD4 TCM	SRSF5
0	-6.65531	0.011	0.225	0	CD4 TCM	C1QA
0	0.897402	0.41	0.196	0	CD4 TCM	PBXIP1
0	0.846859	0.429	0.216	0	CD4 TCM	ITK
0	0.436184	0.582	0.369	0	CD4 TCM	SEPTIN1
0	1.13414	0.369	0.157	0	CD4 TCM	AC119396.1
0	0.737407	0.566	0.354	0	CD4 TCM	FOXP1
0	-4.1029	0.652	0.864	0	CD4 TCM	CD74
0	0.870093	0.412	0.2	0	CD4 TCM	CDC25B
0	0.435351	0.638	0.428	0	CD4 TCM	CD44
0	0.783497	0.455	0.245	0	CD4 TCM	S1PR4
0	1.17033	0.355	0.145	0	CD4 TCM	THEM4
0	0.453285	0.53	0.321	0	CD4 TCM	TC2N
0	1.04278	0.362	0.154	0	CD4 TCM	CD5
0	0.301199	0.96	0.752	0	CD4 TCM	MT-CO3
0	0.786609	0.543	0.336	0	CD4 TCM	IER2
0	-6.62082	0.012	0.219	0	CD4 TCM	C1QB
0	0.898528	0.425	0.218	0	CD4 TCM	CYLD
0	0.342141	0.702	0.495	0	CD4 TCM	GIMAP4
0	0.358915	0.829	0.622	0	CD4 TCM	RAC2
0	0.404943	0.993	0.787	0	CD4 TCM	MALAT1
0	0.747679	0.465	0.26	0	CD4 TCM	NSD3
0	0.49852	0.538	0.334	0	CD4 TCM	GIMAP1
0	0.364822	0.68	0.477	0	CD4 TCM	SOD1
0	0.745587	0.442	0.241	0	CD4 TCM	OCIAD2
0	0.699245	0.453	0.252	0	CD4 TCM	CYFIP2
0	1.01092	0.388	0.187	0	CD4 TCM	MDFIC
0	0.670819	0.439	0.238	0	CD4 TCM	OPTN
0	-5.268	0.013	0.214	0	CD4 TCM	GSN
0	0.771133	0.479	0.278	0	CD4 TCM	CYTH1
0	0.397326	0.691	0.491	0	CD4 TCM	MYH9
0	1.10552	0.329	0.13	0	CD4 TCM	TRAT1
0	0.458854	0.891	0.693	0	CD4 TCM	SARAF
0	0.735493	0.46	0.262	0	CD4 TCM	ZC3HAV1
0	0.702564	0.451	0.253	0	CD4 TCM	GPR183
0	0.788864	0.354	0.156	0	CD4 TCM	KLRB1
0	0.515192	0.582	0.385	0	CD4 TCM	SMCHD1
0	1.66516	0.305	0.109	0	CD4 TCM	ANK3
0	-2.08942	0.237	0.433	0	CD4 TCM	CST7
0	-6.62611	0.012	0.208	0	CD4 TCM	APOE
0	0.62852	0.476	0.281	0	CD4 TCM	NDFIP1
0	0.600052	0.474	0.279	0	CD4 TCM	SLFN5
0	1.87478	0.255	0.062	0	CD4 TCM	TNFRSF25
0	1.15811	0.311	0.118	0	CD4 TCM	SLAMF1
0	0.532806	0.491	0.298	0	CD4 TCM	PSIP1
0	0.348397	0.603	0.411	0	CD4 TCM	LY6E
0	0.373139	0.659	0.467	0	CD4 TCM	STK4
0	0.447707	0.571	0.379	0	CD4 TCM	RESF1
0	0.935496	0.36	0.169	0	CD4 TCM	PIK3IP1
0	0.29159	0.698	0.507	0	CD4 TCM	HIST1H4C
0	1.16886	0.31	0.12	0	CD4 TCM	CD28
0	0.421531	0.514	0.324	0	CD4 TCM	CD96
0	0.673245	0.438	0.248	0	CD4 TCM	FAM107B
0	-4.99659	0.038	0.228	0	CD4 TCM	IFI30
0	0.428719	0.567	0.377	0	CD4 TCM	NDUFB9
0	0.434455	0.547	0.358	0	CD4 TCM	CYTIP
0	0.637756	0.482	0.293	0	CD4 TCM	CD47
0	2.44996	0.227	0.039	0	CD4 TCM	AC139720.1
0	0.610565	0.507	0.319	0	CD4 TCM	EPC1
0	0.989359	0.332	0.145	0	CD4 TCM	LDLRAP1
0	0.810434	0.38	0.194	0	CD4 TCM	PRKCQ
0	0.480145	0.452	0.267	0	CD4 TCM	ZAP70
0	1.12072	0.32	0.135	0	CD4 TCM	THOC3
0	0.785964	0.384	0.2	0	CD4 TCM	RASGRP2
0	0.653693	0.462	0.279	0	CD4 TCM	AAK1
0	0.996704	0.34	0.158	0	CD4 TCM	ABLIM1
0	0.585474	0.479	0.297	0	CD4 TCM	EPB41
0	0.333168	0.59	0.409	0	CD4 TCM	DDX24
0	0.400534	0.511	0.33	0	CD4 TCM	RBL2
0	0.285951	0.655	0.475	0	CD4 TCM	ANP32B
0	0.366134	0.472	0.292	0	CD4 TCM	LBH
0	-2.24976	0.308	0.488	0	CD4 TCM	CCL5
0	0.554482	0.484	0.305	0	CD4 TCM	STK17B
0	0.157417	0.866	0.688	0	CD4 TCM	EMP3
0	-5.95693	0.006	0.184	0	CD4 TCM	MEF2C
0	0.362492	0.544	0.367	0	CD4 TCM	SUN2
0	0.712096	0.405	0.228	0	CD4 TCM	SPTAN1
0	0.284025	0.724	0.547	0	CD4 TCM	SSR2
0	-4.54134	0.017	0.193	0	CD4 TCM	HLA-DMB
0	0.326661	0.563	0.387	0	CD4 TCM	CUTA
0	0.326676	0.557	0.382	0	CD4 TCM	KLF6
0	0.301097	0.422	0.247	0	CD4 TCM	TIMP1
0	0.337978	0.586	0.411	0	CD4 TCM	MT-ATP8
0	0.486632	0.457	0.283	0	CD4 TCM	FCMR
0	0.942327	0.315	0.141	0	CD4 TCM	STMN3
0	0.761129	0.365	0.191	0	CD4 TCM	SYTL1
0	0.469079	0.472	0.298	0	CD4 TCM	PPP1R2
0	1.03432	0.347	0.173	0	CD4 TCM	PAG1
0	1.19174	0.3	0.126	0	CD4 TCM	MYC
0	1.25942	0.284	0.111	0	CD4 TCM	PIM2
0	0.491754	0.848	0.675	0	CD4 TCM	HINT1
0	0.279848	0.752	0.58	0	CD4 TCM	GPSM3
0	0.980005	0.322	0.15	0	CD4 TCM	PTGER2
0	-5.89459	0.007	0.179	0	CD4 TCM	CD68
0	0.365998	0.538	0.367	0	CD4 TCM	BIN2
0	0.402029	0.544	0.374	0	CD4 TCM	PNISR
0	0.72286	0.392	0.222	0	CD4 TCM	RASA3
0	0.857536	0.371	0.201	0	CD4 TCM	ARHGEF3
0	-5.9265	0.015	0.185	0	CD4 TCM	LYZ
0	0.443855	0.502	0.332	0	CD4 TCM	ARHGEF1
0	0.347374	0.789	0.62	0	CD4 TCM	NOP53
0	-2.01705	0.223	0.392	0	CD4 TCM	CTSW
0	-3.60264	0.024	0.193	0	CD4 TCM	CCL4
0	2.06438	0.212	0.043	0	CD4 TCM	TNFRSF4
0	-6.69056	0.009	0.177	0	CD4 TCM	CD14
0	-6.32487	0.005	0.173	0	CD4 TCM	CYBB
0	0.286332	0.706	0.538	0	CD4 TCM	GAS5
0	0.794676	0.34	0.173	0	CD4 TCM	TMEM173
0	0.759402	0.382	0.215	0	CD4 TCM	DDIT4
0	0.438349	0.514	0.348	0	CD4 TCM	CDC42SE2
0	0.988139	0.28	0.114	0	CD4 TCM	CD82
0	0.615705	0.396	0.23	0	CD4 TCM	ATP1A1
0	-5.86745	0.004	0.17	0	CD4 TCM	LYN
0	1.22032	0.294	0.128	0	CD4 TCM	CDC14A
0	0.460715	0.483	0.317	0	CD4 TCM	EML4
0	-6.40772	0.008	0.174	0	CD4 TCM	APOC1
0	0.628594	0.467	0.303	0	CD4 TCM	DOCK10
0	0.535845	0.405	0.241	0	CD4 TCM	TRBC1
0	0.9758	0.322	0.158	0	CD4 TCM	TNIK
0	0.604742	0.385	0.221	0	CD4 TCM	RHOF
0	-4.87256	0.016	0.18	0	CD4 TCM	MS4A6A
0	1.10777	0.273	0.11	0	CD4 TCM	MARCKSL1
0	0.368377	0.501	0.338	0	CD4 TCM	CHURC1
0	-3.06716	0.058	0.22	0	CD4 TCM	RNF130
0	0.415416	0.44	0.278	0	CD4 TCM	MZT2A
0	0.384149	0.48	0.319	0	CD4 TCM	KIF2A
0	0.231909	0.958	0.797	0	CD4 TCM	HLA-A
0	1.53666	0.232	0.072	0	CD4 TCM	ICOS
0	0.272378	0.917	0.757	0	CD4 TCM	HLA-E
0	0.621662	0.317	0.157	0	CD4 TCM	SUSD3
0	0.409479	0.491	0.331	0	CD4 TCM	MPHOSPH8
0	0.696087	0.344	0.185	0	CD4 TCM	ITGB7
0	-4.20387	0.015	0.173	0	CD4 TCM	ZEB2
0	0.477247	0.418	0.26	0	CD4 TCM	SLC38A1
0	0.433416	0.431	0.274	0	CD4 TCM	MCL1
0	0.66678	0.351	0.196	0	CD4 TCM	LIMS1
0	0.623072	0.351	0.196	0	CD4 TCM	R3HDM4
0	0.899999	0.285	0.13	0	CD4 TCM	AC243960.1
0	0.433873	0.429	0.275	0	CD4 TCM	CDKN1B
0	3.32428	0.168	0.015	0	CD4 TCM	TSHZ2
0	0.608329	0.357	0.204	0	CD4 TCM	SLC2A3
0	0.531269	0.405	0.253	0	CD4 TCM	P2RY8
0	0.949216	0.29	0.138	0	CD4 TCM	SH3BP5
0	1.315	0.235	0.084	0	CD4 TCM	LINC02273
0	0.739824	0.329	0.179	0	CD4 TCM	ESYT1
0	0.579555	0.404	0.254	0	CD4 TCM	GLG1
0	-3.2087	0.039	0.189	0	CD4 TCM	PTMS
0	0.554949	0.379	0.23	0	CD4 TCM	SPN
0	0.658322	0.357	0.208	0	CD4 TCM	TMC8
0	0.61687	0.351	0.202	0	CD4 TCM	CHD3
0	0.643816	0.34	0.193	0	CD4 TCM	ARID5B
0	0.515428	0.435	0.288	0	CD4 TCM	CXCR3
0	0.539406	0.361	0.214	0	CD4 TCM	TNFRSF14
0	-6.1851	0.004	0.151	0	CD4 TCM	RAB31
0	0.373336	0.922	0.776	0	CD4 TCM	VIM
0	0.581494	0.332	0.186	0	CD4 TCM	CCND2
0	1.54976	0.21	0.064	0	CD4 TCM	IL6R
0	-3.22396	0.07	0.215	0	CD4 TCM	LST1
0	1.09816	0.267	0.124	0	CD4 TCM	HIVEP2
0	1.40815	0.208	0.065	0	CD4 TCM	ID3
0	1.67607	0.218	0.077	0	CD4 TCM	PRKCA
0	0.531127	0.911	0.77	0	CD4 TCM	FXYD5
0	-5.5183	0.006	0.147	0	CD4 TCM	LY86
0	1.11418	0.239	0.099	0	CD4 TCM	CHMP7
0	0.405725	0.353	0.213	0	CD4 TCM	DSTN
0	0.81602	0.281	0.142	0	CD4 TCM	UPP1
0	0.83187	0.281	0.142	0	CD4 TCM	IL27RA
0	0.577325	0.335	0.196	0	CD4 TCM	SMAP1
0	-3.73185	0.025	0.164	0	CD4 TCM	CEBPD
0	-1.45024	0.39	0.529	0	CD4 TCM	GSTP1
0	-1.93317	0.147	0.286	0	CD4 TCM	PRF1
0	0.638195	0.359	0.22	0	CD4 TCM	CD69
0	-6.75355	0.003	0.142	0	CD4 TCM	SERPINA1
0	1.08564	0.235	0.096	0	CD4 TCM	TMEM204
0	0.619138	0.33	0.192	0	CD4 TCM	FGD3
0	0.296196	0.898	0.76	0	CD4 TCM	CALM1
0	0.630333	0.309	0.171	0	CD4 TCM	HIST1H1D
0	1.42682	0.214	0.077	0	CD4 TCM	PASK
0	1.2148	0.23	0.093	0	CD4 TCM	PVT1
0	0.773268	0.316	0.179	0	CD4 TCM	KLF12
0	0.995649	0.233	0.096	0	CD4 TCM	TBC1D4
0	1.85408	0.184	0.048	0	CD4 TCM	TRABD2A
0	0.530907	0.465	0.329	0	CD4 TCM	RPS4Y1
0	0.721887	0.305	0.17	0	CD4 TCM	FKBP5
0	0.710198	0.284	0.149	0	CD4 TCM	GATA3
0	-6.57477	0.003	0.137	0	CD4 TCM	TREM2
0	0.937246	0.26	0.127	0	CD4 TCM	CNST
0	0.618161	0.327	0.194	0	CD4 TCM	MGAT4A
0	0.705385	0.328	0.195	0	CD4 TCM	PDE3B
0	0.337858	0.906	0.773	0	CD4 TCM	MYL12A
0	0.695213	0.277	0.146	0	CD4 TCM	C16orf54
0	0.745213	0.271	0.14	0	CD4 TCM	SFXN1
0	0.643214	0.291	0.16	0	CD4 TCM	ORAI1
0	-6.41974	0.004	0.134	0	CD4 TCM	F13A1
0	0.912891	0.241	0.111	0	CD4 TCM	FAM102A
0	-6.45766	0.003	0.132	0	CD4 TCM	CSF1R
0	0.964162	0.218	0.089	0	CD4 TCM	BIRC3
0	0.675272	0.286	0.157	0	CD4 TCM	GRAP2
0	0.62979	0.283	0.154	0	CD4 TCM	ADSL
0	-6.03675	0.004	0.131	0	CD4 TCM	KLRD1
0	-2.01915	0.083	0.21	0	CD4 TCM	MATK
0	0.540628	0.293	0.167	0	CD4 TCM	NECAP2
0	-2.86933	0.025	0.15	0	CD4 TCM	EOMES
0	-5.90526	0.007	0.132	0	CD4 TCM	FSCN1
0	1.07555	0.21	0.085	0	CD4 TCM	SH3YL1
0	1.09255	0.232	0.108	0	CD4 TCM	UBXN11
0	1.69452	0.171	0.047	0	CD4 TCM	NPDC1
0	0.781429	0.294	0.17	0	CD4 TCM	PDE7A
0	-5.20463	0.009	0.132	0	CD4 TCM	HLA-DQA2
0	-6.30311	0.003	0.126	0	CD4 TCM	MARCKS
0	-6.44301	0.002	0.125	0	CD4 TCM	SYK
0	-5.67422	0.005	0.128	0	CD4 TCM	IL18
0	-2.20225	0.26	0.383	0	CD4 TCM	NPC2
0	2.59833	0.142	0.019	0	CD4 TCM	FBLN7
0	0.845319	0.23	0.108	0	CD4 TCM	NMRK1
0	0.972202	0.217	0.095	0	CD4 TCM	ITGA6
0	-5.87943	0.004	0.126	0	CD4 TCM	ALDH2
0	1.04605	0.227	0.106	0	CD4 TCM	PHTF2
0	1.95868	0.158	0.037	0	CD4 TCM	FAAH2
0	-2.50122	0.047	0.167	0	CD4 TCM	SKAP2
0	-4.7477	0.013	0.132	0	CD4 TCM	CXCL16
0	0.867125	0.237	0.118	0	CD4 TCM	TNFSF8
0	0.726059	0.264	0.146	0	CD4 TCM	TNFSF10
0	1.13429	0.194	0.076	0	CD4 TCM	DPP4
0	-3.93109	0.009	0.127	0	CD4 TCM	PECAM1
0	0.97418	0.236	0.118	0	CD4 TCM	MLLT3
0	0.345612	0.888	0.771	0	CD4 TCM	S100A4
0	-6.25303	0.003	0.12	0	CD4 TCM	MNDA
0	-6.3659	0.003	0.12	0	CD4 TCM	PLXDC2
0	0.732997	0.234	0.118	0	CD4 TCM	TRAF1
0	0.859396	0.229	0.113	0	CD4 TCM	SHISAL2A
0	0.943326	0.209	0.093	0	CD4 TCM	IL6ST
0	1.77224	0.158	0.042	0	CD4 TCM	CSGALNACT1
0	-4.76011	0.009	0.124	0	CD4 TCM	XCL2
0	0.899891	0.238	0.123	0	CD4 TCM	MAP3K1
0	-2.35459	0.058	0.173	0	CD4 TCM	ABI3
0	0.782271	0.259	0.145	0	CD4 TCM	TAB2
0	-2.78326	0.052	0.165	0	CD4 TCM	A2M
0	-2.06789	0.131	0.244	0	CD4 TCM	CMC1
0	-0.984314	0.328	0.441	0	CD4 TCM	GZMA
0	0.970537	0.219	0.107	0	CD4 TCM	STAT5B
0	0.89866	0.228	0.117	0	CD4 TCM	RASSF3
0	0.936795	0.207	0.096	0	CD4 TCM	SOCS1
0	1.66796	0.152	0.041	0	CD4 TCM	LINC00892
0	-4.81494	0.007	0.117	0	CD4 TCM	CX3CR1
0	-4.09621	0.013	0.123	0	CD4 TCM	TGFBI
0	1.1846	0.186	0.076	0	CD4 TCM	CD226
0	-2.80198	0.025	0.134	0	CD4 TCM	GZMH
0	0.806201	0.206	0.097	0	CD4 TCM	SIRPG
0	-1.37125	0.156	0.264	0	CD4 TCM	APMAP
0	-1.41594	0.238	0.346	0	CD4 TCM	CD63
0	-2.12216	0.053	0.16	0	CD4 TCM	PLAAT3
0	0.252861	0.858	0.751	0	CD4 TCM	NPM1
0	-1.3246	0.164	0.27	0	CD4 TCM	RHOC
0	-6.75224	0.002	0.108	0	CD4 TCM	FCGR2A
0	1.13908	0.174	0.068	0	CD4 TCM	CFAP36
0	1.85709	0.139	0.034	0	CD4 TCM	CRIP2
0	0.849321	0.2	0.096	0	CD4 TCM	JAK3
0	-6.2126	0.002	0.106	0	CD4 TCM	CD86
0	1.24459	0.163	0.06	0	CD4 TCM	PLK3
0	-6.52527	0.001	0.103	0	CD4 TCM	FGR
0	-6.77049	0.002	0.104	0	CD4 TCM	FCGR1A
0	-5.07785	0.005	0.107	0	CD4 TCM	PILRA
0	-5.01523	0.006	0.108	0	CD4 TCM	YBX3
0	-6.27984	0.004	0.106	0	CD4 TCM	HAMP
0	1.20847	0.164	0.063	0	CD4 TCM	ATP8B2
0	-6.79536	0.002	0.103	0	CD4 TCM	CSTA
0	1.47416	0.147	0.046	0	CD4 TCM	ADAM19
0	-6.5498	0.002	0.103	0	CD4 TCM	HCK
0	-2.33238	0.363	0.463	0	CD4 TCM	PSAP
0	-3.05705	0.035	0.135	0	CD4 TCM	CALHM6
0	-3.11559	0.023	0.121	0	CD4 TCM	XCL1
0	2.20898	0.124	0.026	0	CD4 TCM	CMTM8
0	-6.09264	0.002	0.1	0	CD4 TCM	CLEC7A
0	-7.04941	0.002	0.099	0	CD4 TCM	FCGR3A
0	-2.86936	0.024	0.121	0	CD4 TCM	MAP3K8
0	-6.45621	0.002	0.099	0	CD4 TCM	VSIG4
0	-5.17751	0.005	0.102	0	CD4 TCM	IGSF6
0	-5.7241	0.003	0.099	0	CD4 TCM	LRMDA
0	-4.92496	0.003	0.099	0	CD4 TCM	KLRC4
0	-6.76434	0.002	0.098	0	CD4 TCM	PLD4
0	-1.84818	0.258	0.354	0	CD4 TCM	IFITM3
0	-2.35619	0.055	0.15	0	CD4 TCM	CD302
0	1.6074	0.136	0.041	0	CD4 TCM	TNF
0	1.39846	0.137	0.042	0	CD4 TCM	FBLN5
0	1.00783	0.168	0.074	0	CD4 TCM	MPRIP
0	-2.30476	0.071	0.165	0	CD4 TCM	FCGRT
0	-2.00944	0.065	0.159	0	CD4 TCM	SERPINB6
0	-3.28845	0.016	0.11	0	CD4 TCM	ITGAM
0	-2.44928	0.075	0.168	0	CD4 TCM	LGALS9
0	1.60491	0.129	0.036	0	CD4 TCM	CCR6
0	1.09657	0.159	0.066	0	CD4 TCM	DUSP16
0	-3.38106	0.022	0.115	0	CD4 TCM	RNASE6
0	-2.32928	0.1	0.193	0	CD4 TCM	GRN
0	0.968416	0.166	0.074	0	CD4 TCM	LINS1
0	-3.6047	0.011	0.102	0	CD4 TCM	LAT2
0	0.982578	0.158	0.068	0	CD4 TCM	LINC01550
0	-3.7669	0.01	0.099	0	CD4 TCM	HDAC9
0	-4.24201	0.02	0.109	0	CD4 TCM	GNLY
0	-6.29659	0.003	0.092	0	CD4 TCM	SCIN
0	-2.92834	0.03	0.119	0	CD4 TCM	FGL2
0	-3.24019	0.029	0.117	0	CD4 TCM	CYFIP1
0	-6.53733	0.002	0.09	0	CD4 TCM	C3
0	-3.48722	0.009	0.096	0	CD4 TCM	SLAMF7
0	1.19709	0.141	0.054	0	CD4 TCM	TRIB2
0	1.14522	0.151	0.064	0	CD4 TCM	SVIL
0	-5.78001	0.002	0.089	0	CD4 TCM	MS4A7
0	-6.59358	0.001	0.087	0	CD4 TCM	RAB32
0	-1.38227	0.27	0.356	0	CD4 TCM	PYCARD
0	1.73357	0.116	0.031	0	CD4 TCM	MAST4
0	-4.47262	0.009	0.094	0	CD4 TCM	KCTD12
0	-6.08555	0.002	0.087	0	CD4 TCM	CPVL
0	1.03558	0.145	0.06	0	CD4 TCM	AC008555.4
0	-6.4907	0.001	0.085	0	CD4 TCM	HNMT
0	-5.14817	0.004	0.088	0	CD4 TCM	MARCH1
0	-1.42512	0.323	0.407	0	CD4 TCM	CHCHD10
0	-6.13932	0.002	0.085	0	CD4 TCM	FCGR2B
0	-5.91731	0.002	0.085	0	CD4 TCM	IL13RA1
0	-2.35494	0.062	0.145	0	CD4 TCM	PEA15
0	-4.76165	0.006	0.089	0	CD4 TCM	CD9
0	-5.65684	0.003	0.085	0	CD4 TCM	GATM
0	-2.38943	0.043	0.125	0	CD4 TCM	CTSZ
0	-5.49799	0.005	0.086	0	CD4 TCM	SELENOP
0	-6.60496	0.002	0.081	0	CD4 TCM	MSR1
0	-5.81928	0.002	0.081	0	CD4 TCM	BLNK
0	-6.35495	0.001	0.08	0	CD4 TCM	CSF2RA
0	-4.67283	0.003	0.081	0	CD4 TCM	PIK3AP1
0	-5.64299	0.002	0.08	0	CD4 TCM	ATP8B4
0	-4.45616	0.006	0.084	0	CD4 TCM	CCL4L2
0	-5.88901	0.002	0.079	0	CD4 TCM	ZNF385A
0	-3.75088	0.011	0.086	0	CD4 TCM	UBE2E2
0	1.57916	0.105	0.03	0	CD4 TCM	LTA
0	-2.13558	0.021	0.096	0	CD4 TCM	PLCG2
0	-5.67255	0.002	0.076	0	CD4 TCM	SLC8A1
0	-2.38392	0.034	0.108	0	CD4 TCM	PAK1
0	-5.43571	0.002	0.076	0	CD4 TCM	EPB41L3
0	2.24546	0.095	0.022	0	CD4 TCM	FRY
0	1.57849	0.1	0.027	0	CD4 TCM	FHL1
0	-6.41631	0.001	0.074	0	CD4 TCM	LPCAT2
0	1.32698	0.108	0.035	0	CD4 TCM	FXYD1
0	-5.61988	0.002	0.074	0	CD4 TCM	TCF4
0	-5.61268	0.002	0.074	0	CD4 TCM	HMOX1
0	1.472	0.101	0.03	0	CD4 TCM	MORC2
0	-3.33503	0.015	0.085	0	CD4 TCM	NCF2
0	1.91174	0.092	0.022	0	CD4 TCM	PKIA
0	-6.70127	0.001	0.071	0	CD4 TCM	KLRC1
0	-5.54343	0.003	0.073	0	CD4 TCM	C5AR1
0	-6.3452	0.001	0.071	0	CD4 TCM	CD33
0	-3.73814	0.016	0.085	0	CD4 TCM	CFD
0	-4.68282	0.005	0.074	0	CD4 TCM	ADAP2
0	-2.45844	0.026	0.094	0	CD4 TCM	OGFRL1
0	1.86675	0.09	0.022	0	CD4 TCM	HAPLN3
0	-4.96348	0.007	0.075	0	CD4 TCM	FCGBP
0	-5.62404	0.002	0.069	0	CD4 TCM	ARHGAP24
0	-4.13689	0.013	0.079	0	CD4 TCM	RHOB
0	2.11714	0.084	0.018	0	CD4 TCM	TSPAN18
0	1.74047	0.087	0.021	0	CD4 TCM	CHRM3-AS2
0	-1.31247	0.416	0.481	0	CD4 TCM	RAC1
0	-6.5945	0.001	0.066	0	CD4 TCM	ADAM28
0	2.23591	0.079	0.014	0	CD4 TCM	IATPR
0	-5.56505	0.001	0.066	0	CD4 TCM	MS4A4A
0	-4.2867	0.004	0.069	0	CD4 TCM	CRTAM
0	-6.24802	0.001	0.066	0	CD4 TCM	CLEC9A
0	-4.31443	0.005	0.07	0	CD4 TCM	CIITA
0	-3.33886	0.015	0.079	0	CD4 TCM	EPB41L2
0	-6.32413	0.002	0.066	0	CD4 TCM	LYVE1
0	-3.48275	0.014	0.078	0	CD4 TCM	CDK2AP1
0	-4.44278	0.005	0.068	0	CD4 TCM	SHTN1
0	-6.51106	0.001	0.064	0	CD4 TCM	FOLR2
0	-4.04828	0.008	0.071	0	CD4 TCM	TRDC
0	-6.04452	0.002	0.065	0	CD4 TCM	VMO1
0	-4.78589	0.004	0.067	0	CD4 TCM	TNFSF13
0	-5.86933	0.002	0.065	0	CD4 TCM	NAPSA
0	-5.96815	0.001	0.063	0	CD4 TCM	GAPT
0	-3.00413	0.014	0.076	0	CD4 TCM	ENTPD1
0	-5.36283	0.002	0.064	0	CD4 TCM	GPR34
0	-6.40399	0.001	0.062	0	CD4 TCM	BTK
0	-6.20507	0.001	0.061	0	CD4 TCM	CSF3R
0	-6.14379	0.002	0.062	0	CD4 TCM	MARCO
0	-4.38636	0.003	0.063	0	CD4 TCM	CXXC5
0	-6.44313	0.001	0.061	0	CD4 TCM	CLEC10A
0	-3.80093	0.006	0.065	0	CD4 TCM	SNCA
0	-5.33498	0.002	0.061	0	CD4 TCM	RASSF4
0	-4.87283	0.004	0.063	0	CD4 TCM	PLBD1
0	-6.73283	0.001	0.06	0	CD4 TCM	ITGAX
0	-4.87869	0.002	0.061	0	CD4 TCM	PRAM1
0	-6.29632	0.001	0.06	0	CD4 TCM	LILRB4
0	-6.30477	0.006	0.064	0	CD4 TCM	S100A9
0	-4.28051	0.006	0.064	0	CD4 TCM	TLR2
0	-5.29745	0.002	0.06	0	CD4 TCM	HLA-DOA
0	-7.63366	0.001	0.058	0	CD4 TCM	KYNU
0	-6.35018	0.001	0.058	0	CD4 TCM	PYGL
0	-4.83152	0.003	0.06	0	CD4 TCM	BASP1
0	-4.31465	0.003	0.06	0	CD4 TCM	FGD4
0	-5.14696	0.003	0.06	0	CD4 TCM	SLC7A7
0	-4.09907	0.003	0.06	0	CD4 TCM	GAS7
0	-3.73978	0.006	0.062	0	CD4 TCM	FCRL6
0	-4.69751	0.003	0.059	0	CD4 TCM	C1orf21
0	2.10977	0.068	0.013	0	CD4 TCM	MDS2
0	-5.29548	0.001	0.056	0	CD4 TCM	FAM49A
0	-3.96286	0.008	0.063	0	CD4 TCM	SLC11A1
0	-6.10133	0.001	0.056	0	CD4 TCM	DAB2
0	-6.03701	0.001	0.056	0	CD4 TCM	TM6SF1
0	-3.27787	0.009	0.064	0	CD4 TCM	ZFHX3
0	-5.24139	0.003	0.058	0	CD4 TCM	IRF8
0	-6.94073	0.001	0.056	0	CD4 TCM	FPR1
0	3.72263	0.057	0.003	0	CD4 TCM	ANKRD55
0	-4.08882	0.005	0.059	0	CD4 TCM	LRP1
0	-3.41349	0.008	0.062	0	CD4 TCM	AL034397.3
0	-6.54951	0.001	0.054	0	CD4 TCM	MPEG1
0	-6.83627	0.001	0.054	0	CD4 TCM	CD163
0	0.190753	0.911	0.859	0	CD4 TCM	RPL13A
0	-3.87673	0.006	0.058	0	CD4 TCM	GNB4
0	-7.23953	0.004	0.056	0	CD4 TCM	SPP1
0	-5.23034	0.002	0.054	0	CD4 TCM	DOCK4
0	-5.51671	0.001	0.053	0	CD4 TCM	MYOF
0	-7.66423	0.003	0.054	0	CD4 TCM	S100A8
0	-6.96563	0.001	0.052	0	CD4 TCM	TMEM176B
0	-6.29086	0.001	0.052	0	CD4 TCM	KLRC2
0	-6.00562	0.001	0.052	0	CD4 TCM	BHLHE41
0	2.65723	0.059	0.008	0	CD4 TCM	TTC39C-AS1
0	-6.71688	0.001	0.052	0	CD4 TCM	LILRB2
0	-5.85772	0.001	0.051	0	CD4 TCM	RAB13
0	-6.00894	0.002	0.052	0	CD4 TCM	CYP27A1
0	-4.98018	0.002	0.052	0	CD4 TCM	RBM47
0	-5.66593	0.001	0.05	0	CD4 TCM	CLEC12A
0	-4.62421	0.003	0.052	0	CD4 TCM	CLEC4A
0	-0.520667	0.808	0.76	0	CD4 TCM	CYBA
0	-6.70389	0.001	0.049	0	CD4 TCM	OLR1
0	-5.50845	0.001	0.049	0	CD4 TCM	SCIMP
0	-4.80057	0.002	0.049	0	CD4 TCM	CCR1
0	-4.3463	0.004	0.051	0	CD4 TCM	TRGV9
0	-5.40588	0.001	0.048	0	CD4 TCM	CTBP2
0	-4.58812	0.004	0.051	0	CD4 TCM	CCND1
0	-6.72677	0.001	0.048	0	CD4 TCM	FES
0	-4.48139	0.003	0.049	0	CD4 TCM	LINC02446
0	-6.7104	0	0.046	0	CD4 TCM	LRRC25
0	-6.14485	0.003	0.048	0	CD4 TCM	FCER1A
0	-5.97078	0.001	0.046	0	CD4 TCM	LILRA2
0	-5.95585	0.001	0.046	0	CD4 TCM	MAFB
0	-6.9352	0.001	0.045	0	CD4 TCM	SLC2A5
0	-5.0689	0.002	0.046	0	CD4 TCM	ARHGAP22
0	-5.12035	0.002	0.046	0	CD4 TCM	C19orf38
0	-5.96632	0.001	0.044	0	CD4 TCM	PADI2
0	-4.90255	0.002	0.045	0	CD4 TCM	PTAFR
0	-6.00272	0.001	0.044	0	CD4 TCM	ETV5
0	-6.43892	0	0.043	0	CD4 TCM	LILRB1
0	-5.50567	0.001	0.042	0	CD4 TCM	TBC1D9
0	-6.16232	0.001	0.042	0	CD4 TCM	CLEC5A
0	-5.29122	0.001	0.042	0	CD4 TCM	LRRK1
0	-6.41041	0.001	0.041	0	CD4 TCM	RTN1
0	-6.70884	0	0.04	0	CD4 TCM	CD300C
0	-2.21132	0.91	0.946	0	CD4 TCM	FTL
0	0.37543	0.927	0.901	0	CD4 TCM	RPSA
0	-1.1637	0.71	0.736	0	CD4 TCM	GABARAP
0	-1.80955	0.921	0.947	0	CD4 TCM	FTH1
0	-1.21206	0.567	0.592	0	CD4 TCM	SRGN
0	0.276617	0.99	0.967	0	CD4 TCM	B2M
0	0.135586	0.952	0.967	0	CD4 TCM	RPL19
0	-0.387227	0.956	0.971	0	CD4 TCM	TMSB4X
0	0.135987	0.967	0.981	0	CD4 TCM	RPL10
0	0.221502	0.958	0.971	0	CD4 TCM	RPL11
0	0.206806	0.955	0.968	0	CD4 TCM	RPL32
0	0.223063	0.959	0.972	0	CD4 TCM	RPS12
0	0.226305	0.957	0.97	0	CD4 TCM	RPL30
0	-0.373498	0.947	0.96	0	CD4 TCM	RPS24
0	-0.751292	0.751	0.739	0	CD4 TCM	RHOA
0	-0.477422	0.969	0.981	0	CD4 TCM	ACTB
0	0.205899	0.956	0.968	0	CD4 TCM	RPS15A
0	0.153296	0.958	0.97	0	CD4 TCM	RPL28
0	-0.862612	0.702	0.691	0	CD4 TCM	CALM2
0	0.220557	0.954	0.965	0	CD4 TCM	RPS3
0	-0.651209	0.898	0.909	0	CD4 TCM	GAPDH
0	0.125228	0.963	0.973	0	CD4 TCM	RPL13
0	0.209677	0.953	0.962	0	CD4 TCM	RPS27A
0	0.156518	0.955	0.964	0	CD4 TCM	RPS28
0	-0.810382	0.765	0.757	0	CD4 TCM	YBX1
0	0.188873	0.955	0.962	0	CD4 TCM	RPL34
0	0.249055	0.958	0.951	0	CD4 TCM	RPS21
0	0.227187	0.943	0.949	0	CD4 TCM	RPL18
0	0.180309	0.944	0.94	0	CD4 TCM	RPS25
0	-0.768762	0.756	0.752	0	CD4 TCM	ARPC3
0	-0.731465	0.808	0.812	0	CD4 TCM	OAZ1
0	0.27066	0.948	0.949	0	CD4 TCM	RPL14
0	0.182591	0.942	0.942	0	CD4 TCM	RPL36
0	-0.492307	0.88	0.88	0	CD4 TCM	ATP5F1E
5.19504058097787e-308	3.07607	0.053	0.006	1.22322425519705e-303	CD4 TCM	AL589693.1
3.86300920936907e-307	0.636117	0.284	0.163	9.09584148438042e-303	CD4 TCM	NFKB1
5.76243548963672e-307	-6.04297	0	0.04	1.35682306038986e-302	CD4 TCM	LTBR
4.96828129667715e-306	0.169009	0.964	0.971	1.1698315141156e-301	CD4 TCM	RPS27
3.95656043306267e-305	0.25403	0.928	0.718	9.31611719568936e-301	CD4 TCM	MT-ATP6
5.62605637530244e-305	-5.1324	0.002	0.043	1.32471123412871e-300	CD4 TCM	IRAK3
5.96929081018136e-304	-0.571741	0.721	0.699	1.4055292141653e-299	CD4 TCM	HCST
6.07421159107095e-304	-6.19429	0.001	0.04	1.43023386123357e-299	CD4 TCM	KLRF1
6.63277331226533e-304	1.06718	0.126	0.048	1.56175280410599e-299	CD4 TCM	SLC40A1
1.92737917372321e-303	0.412646	0.497	0.329	4.53820700244867e-299	CD4 TCM	PRKCH
2.1868005461246e-303	-5.94743	0.001	0.04	5.14904056590498e-299	CD4 TCM	LRRK2
2.38057539360717e-303	0.719535	0.217	0.112	5.60530282178744e-299	CD4 TCM	TOB1
4.91775222015473e-303	0.789329	0.213	0.109	1.15793393775763e-298	CD4 TCM	RASSF7
7.94279248981098e-303	0.789912	0.194	0.094	1.87020991965089e-298	CD4 TCM	UBASH3A
1.15638459752257e-302	0.608522	0.277	0.158	2.72282317332664e-298	CD4 TCM	RGS14
1.65881979507766e-301	0.571365	0.272	0.152	3.90585708948985e-297	CD4 TCM	SVIP
1.60653243993647e-300	0.827779	0.202	0.102	3.78274128307441e-296	CD4 TCM	CBLL1
8.17211698897143e-300	0.337204	0.578	0.409	1.92420666622321e-295	CD4 TCM	SF1
1.76649126206742e-299	1.47138	0.09	0.027	4.15938032566395e-295	CD4 TCM	VSIG1
2.53954731420957e-299	0.611048	0.294	0.172	5.97961810603786e-295	CD4 TCM	TLK1
2.73545355529551e-299	-3.45774	0.015	0.07	6.44089894129881e-295	CD4 TCM	MS4A1
1.23037373579085e-298	0.290001	0.608	0.43	2.89703799829313e-294	CD4 TCM	VAMP2
3.34214406698708e-298	0.269637	0.75	0.575	7.86941242012778e-294	CD4 TCM	GMFG
3.71007404764649e-298	0.946995	0.15	0.065	8.73574035258842e-294	CD4 TCM	CEACAM21
4.96844470223584e-298	1.15335	0.133	0.053	1.16986998958845e-293	CD4 TCM	RETREG1
9.02872624186271e-298	-6.21323	0.001	0.041	2.125903880909e-293	CD4 TCM	GZMB
7.03720586085246e-297	0.273423	0.541	0.358	1.65698049199632e-292	CD4 TCM	PTPRCAP
9.97524966735308e-296	1.3202	0.137	0.057	2.34877228667496e-291	CD4 TCM	DOCK9
1.15896193305004e-295	0.431724	0.359	0.22	2.72889176755963e-291	CD4 TCM	HMOX2
1.45662468268717e-294	-3.55439	0.011	0.063	3.42976847785522e-290	CD4 TCM	H1F0
4.99593905900787e-294	-2.32359	0.042	0.113	1.17634381083399e-289	CD4 TCM	DPYSL2
3.23792581483628e-293	2.16607	0.066	0.014	7.6240201236135e-289	CD4 TCM	TCEA3
1.19987810846928e-292	-3.88587	0.003	0.044	2.82523299420176e-288	CD4 TCM	CD244
3.44665431354968e-292	0.566414	0.283	0.164	8.11549224668407e-288	CD4 TCM	EGLN2
2.75355311296256e-291	0.318666	0.522	0.36	6.48351615978164e-287	CD4 TCM	CIB1
1.7927899177314e-290	0.255656	0.737	0.551	4.22130314029036e-286	CD4 TCM	SON
2.09434610821345e-290	0.842298	0.173	0.081	4.93134734639939e-286	CD4 TCM	TNFRSF10A
3.7032280329521e-290	0.782384	0.212	0.11	8.71962072638902e-286	CD4 TCM	UXS1
1.02800189862829e-289	0.917492	0.178	0.086	2.42053327051016e-285	CD4 TCM	SLC7A6
3.31840675115124e-289	-2.7699	0.01	0.059	7.81352053626072e-285	CD4 TCM	CTNND1
3.46640033255378e-289	-6.23437	0.001	0.038	8.16198622303112e-285	CD4 TCM	SIRPA
1.51356284623152e-288	2.97694	0.048	0.005	3.56383507773673e-284	CD4 TCM	ADTRP
3.91781242842067e-288	0.325131	0.585	0.416	9.2248811439593e-284	CD4 TCM	PRRC2C
5.53257444431701e-288	-5.48749	0.001	0.039	1.30269997865888e-283	CD4 TCM	LINC01094
1.19405321451601e-286	0.344	0.369	0.225	2.81151769889939e-282	CD4 TCM	THEMIS
1.80884726082489e-286	0.630883	0.221	0.116	4.25911176033829e-282	CD4 TCM	FKBP11
3.31321380260987e-286	0.53734	0.326	0.199	7.80129321962521e-282	CD4 TCM	TMC6
9.76820760539956e-286	0.532783	0.329	0.202	2.30002216276738e-281	CD4 TCM	VOPP1
5.03540890299277e-285	0.355399	0.416	0.265	1.18563738029868e-280	CD4 TCM	DENND2D
5.61543793984242e-285	0.865443	0.208	0.109	1.3222110173153e-280	CD4 TCM	FUT8
5.61694090407479e-285	0.890077	0.213	0.112	1.32256490527345e-280	CD4 TCM	BACH2
6.21032888672059e-285	-4.8095	0.002	0.04	1.46228403966723e-280	CD4 TCM	CD160
5.38224519954218e-284	0.353155	0.459	0.307	1.2673034546842e-279	CD4 TCM	SIGIRR
1.17076299662711e-283	0.680964	0.325	0.202	2.7566785518582e-279	CD4 TCM	PACS1
2.91694118108204e-283	-6.04387	0.001	0.04	6.86822970497577e-279	CD4 TCM	SERPINF1
7.20071130816529e-283	-6.10032	0.001	0.038	1.6954794846206e-278	CD4 TCM	PAPSS2
8.9531087854958e-283	0.546483	0.29	0.171	2.10809899463284e-278	CD4 TCM	CRBN
5.77739349063454e-282	0.590162	0.436	0.293	1.36034507130481e-277	CD4 TCM	ZBTB20
7.85003933617804e-282	-6.41408	0.002	0.04	1.84837026209648e-277	CD4 TCM	CD1C
1.53490708359353e-281	-6.14997	0.001	0.037	3.61409221902932e-277	CD4 TCM	CPED1
1.5781981575893e-281	-3.64029	0.004	0.045	3.71602538185978e-277	CD4 TCM	METTL7A
1.73740299086139e-281	-4.62922	0.002	0.04	4.09088908228223e-277	CD4 TCM	FGD2
5.9533284268867e-281	0.388631	0.356	0.222	1.40177071139474e-276	CD4 TCM	PPP1CC
9.78987212632559e-281	-8.12575	0	0.036	2.30512329086462e-276	CD4 TCM	SH2D1B
2.01753086213996e-279	0.464583	0.349	0.217	4.75047816799475e-275	CD4 TCM	MED10
2.77230631208799e-279	0.576661	0.272	0.155	6.52767244244238e-275	CD4 TCM	ANXA2R
9.48833283251235e-279	1.1054	0.13	0.053	2.23412284874336e-274	CD4 TCM	ECE1
1.04311526720477e-278	0.141979	0.953	0.962	2.45611920816034e-274	CD4 TCM	RPS18
1.2666780662733e-278	1.27269	0.133	0.056	2.98252017484711e-274	CD4 TCM	SFMBT1
1.5938681200051e-278	0.373555	0.427	0.282	3.752921875364e-274	CD4 TCM	CDC42SE1
2.14601464542996e-278	0.43059	0.385	0.248	5.05300608412939e-274	CD4 TCM	DOK2
2.23343025052839e-277	0.686299	0.239	0.135	5.25883486789415e-273	CD4 TCM	USP10
5.69121677309663e-277	0.869256	0.192	0.097	1.34005390139333e-272	CD4 TCM	TMEM63A
6.11100576109193e-276	1.28558	0.122	0.049	1.43889741650671e-271	CD4 TCM	RASGRF2
7.30409642584958e-275	0.196293	0.975	0.867	1.71982254443054e-270	CD4 TCM	HLA-B
1.14867086194497e-274	-4.02661	0.004	0.044	2.70466041153563e-270	CD4 TCM	PKIB
1.15102208610899e-274	-4.77369	0.002	0.039	2.71019660395223e-270	CD4 TCM	SLC43A2
4.30608029750653e-274	0.889236	0.238	0.135	1.01390966685089e-269	CD4 TCM	PCNX1
1.21579825103617e-273	0.288482	0.579	0.413	2.86271856188977e-269	CD4 TCM	SEPTIN6
1.59541563796459e-273	0.247976	0.69	0.52	3.75656566115143e-269	CD4 TCM	APRT
5.33620635613366e-273	0.831662	0.186	0.094	1.25646314861523e-268	CD4 TCM	PRORP
7.58365323317263e-273	-4.50786	0.002	0.04	1.78564699028283e-268	CD4 TCM	DOCK5
9.74072774713973e-273	-3.21984	0.006	0.048	2.29355175534152e-268	CD4 TCM	METRNL
1.1876781685099e-272	-6.73586	0.001	0.036	2.7965070155734e-268	CD4 TCM	DHRS9
1.58807453090094e-272	0.330429	0.458	0.305	3.73928029045935e-268	CD4 TCM	ARL4C
1.82968413976982e-272	0.210317	0.903	0.687	4.30817427550203e-268	CD4 TCM	MT-ND4L
2.35741736169372e-272	1.46778	0.089	0.028	5.55077491984403e-268	CD4 TCM	RARG
6.39184879537996e-272	0.491918	0.323	0.2	1.50502471736017e-267	CD4 TCM	CCDC107
2.41861809433188e-271	0.893854	0.148	0.067	5.69487816491384e-267	CD4 TCM	ARMH1
2.59470984139489e-271	0.954656	0.182	0.092	6.10950379254842e-267	CD4 TCM	PATJ
4.22770466226146e-271	-2.28461	0.022	0.079	9.95455339776084e-267	CD4 TCM	GABARAPL1
9.16007080693002e-271	-4.7145	0.002	0.038	2.15683027219974e-266	CD4 TCM	CTTNBP2NL
4.42354161372121e-270	-2.04977	0.035	0.099	1.0415671083668e-265	CD4 TCM	CCDC88A
1.18512933304519e-269	0.742383	0.193	0.099	2.79050552758819e-265	CD4 TCM	GALT
4.87289662343452e-269	0.81802	0.215	0.117	1.14737223895389e-264	CD4 TCM	DIPK1A
8.22189247303585e-269	0.386973	0.499	0.349	1.93592680170102e-264	CD4 TCM	N4BP2L2
8.3085175406269e-268	-1.61086	0.032	0.095	1.95632354011601e-263	CD4 TCM	VAV3
1.00324391034676e-267	1.74609	0.068	0.016	2.36223811130249e-263	CD4 TCM	LINC01891
1.03331815553374e-267	0.614343	0.297	0.18	2.43305092901974e-263	CD4 TCM	RAPGEF6
1.83758528066174e-267	0.134832	0.951	0.961	4.32677830184614e-263	CD4 TCM	RPL39
2.50764533915544e-267	1.56238	0.083	0.025	5.9045017155754e-263	CD4 TCM	VIPR1
2.76543116512434e-267	1.61197	0.076	0.021	6.51148422140176e-263	CD4 TCM	EPHX2
3.80104090936176e-267	-6.69219	0.001	0.035	8.9499309251832e-263	CD4 TCM	TMEM176A
2.72382798930597e-266	1.18302	0.111	0.042	6.41352538361985e-262	CD4 TCM	TRAV8-2
3.78432656083067e-265	-6.30492	0.001	0.035	8.91057532013191e-261	CD4 TCM	IGFBP7
4.21064327129796e-264	-6.61496	0.001	0.035	9.91438064659817e-260	CD4 TCM	NCAM1
4.50849403079678e-264	1.01485	0.111	0.043	1.06157000449141e-259	CD4 TCM	BEX3
6.48312855397592e-264	0.514108	0.282	0.166	1.52651744931917e-259	CD4 TCM	PHF1
3.94130071515794e-263	0.591458	0.32	0.201	9.28018666391089e-259	CD4 TCM	NKTR
4.22023031445787e-263	0.46903	0.41	0.275	9.9369542984225e-259	CD4 TCM	MACF1
6.48072914285096e-263	-1.62944	0.04	0.106	1.52595248397569e-258	CD4 TCM	PTGDR
7.45678896482378e-263	0.268223	0.38	0.249	1.75577552965741e-258	CD4 TCM	NEAT1
7.96961548822122e-263	-5.11736	0.003	0.04	1.87652566285657e-258	CD4 TCM	AL031056.1
1.41881755137015e-262	0.420373	0.354	0.225	3.34074780645616e-258	CD4 TCM	CAPN2
2.34633683269982e-262	-5.61698	0.001	0.035	5.52468470627499e-258	CD4 TCM	WDFY4
4.93750805765226e-262	0.633916	0.256	0.149	1.1625856472548e-257	CD4 TCM	TSPAN14
1.75258707089141e-261	0.716452	0.203	0.108	4.12664151712093e-257	CD4 TCM	ODF2L
2.08927746205077e-261	0.842717	0.174	0.086	4.91941271214473e-257	CD4 TCM	NBPF15
3.28764798975573e-261	-6.63032	0.001	0.034	7.74109595667885e-257	CD4 TCM	MS4A4E
8.61882889343005e-261	0.485208	0.301	0.183	2.02938945124704e-256	CD4 TCM	GIMAP2
1.15125746913542e-260	-3.19947	0.015	0.064	2.71075083682625e-256	CD4 TCM	FOS
1.58899350588719e-260	0.386413	0.399	0.264	3.74144410896199e-256	CD4 TCM	DEF6
2.6656897592273e-260	0.826201	0.19	0.099	6.27663310707659e-256	CD4 TCM	ANTXR2
4.3465460433876e-260	-7.63738	0	0.033	1.02343773137605e-255	CD4 TCM	FCGR1B
4.63584019991144e-260	0.381616	0.405	0.269	1.09155493347115e-255	CD4 TCM	ARHGAP45
8.08324213309704e-260	0.76639	0.231	0.131	1.90328019265903e-255	CD4 TCM	CEP85L
8.86833999063432e-260	-1.93073	0.549	0.557	2.08813933419476e-255	CD4 TCM	TUBA1B
1.00099223947844e-259	0.25244	0.466	0.315	2.35693632707594e-255	CD4 TCM	XBP1
2.9869932432602e-259	-3.30473	0.006	0.047	7.03317429058046e-255	CD4 TCM	TIMP2
5.27535119093921e-259	-5.56295	0.001	0.035	1.24213419141855e-254	CD4 TCM	HHEX
1.38237004334201e-258	-4.62367	0.003	0.04	3.2549285040531e-254	CD4 TCM	HPGDS
4.6608582852265e-258	-3.6791	0.004	0.044	1.09744569183943e-253	CD4 TCM	SIGLEC9
5.02224567320834e-258	1.19934	0.105	0.039	1.18253796621364e-253	CD4 TCM	ST8SIA1
8.32508679555537e-258	-6.05008	0.001	0.034	1.96022493688147e-253	CD4 TCM	STAB1
1.15073257690247e-257	0.437493	0.325	0.201	2.70951492557455e-253	CD4 TCM	GRK6
4.46725037946932e-257	-0.349013	0.88	0.858	1.05185877434985e-252	CD4 TCM	SERF2
5.05198591483105e-257	0.520486	0.337	0.213	1.18954060350612e-252	CD4 TCM	SEMA4D
2.05956395267198e-256	1.11587	0.115	0.046	4.84944928296145e-252	CD4 TCM	ZBTB7B
4.95220467460978e-256	0.546702	0.294	0.18	1.16604611268362e-251	CD4 TCM	IFNAR2
2.64443869945742e-255	0.451101	0.302	0.185	6.22659536174243e-251	CD4 TCM	LRP10
2.67391085303333e-255	0.620907	0.208	0.112	6.29599049455227e-251	CD4 TCM	RNF214
4.05912228174376e-255	-1.37781	0.094	0.176	9.55760932459387e-251	CD4 TCM	LYST
6.12392740270154e-255	-5.83436	0.001	0.034	1.44193994624011e-250	CD4 TCM	AXL
3.06512346364434e-254	-2.49922	0.02	0.072	7.21713970749695e-250	CD4 TCM	AFF3
4.69589857775297e-254	0.296617	0.457	0.308	1.10569627911771e-249	CD4 TCM	TSTD1
8.05238822956641e-254	0.221727	0.81	0.611	1.89601533253371e-249	CD4 TCM	MT-ND5
1.14363433360551e-253	0.589352	0.234	0.132	2.69280140190753e-249	CD4 TCM	KIAA0040
1.17233687866504e-253	0.382157	0.385	0.254	2.76038441450471e-249	CD4 TCM	M6PR
2.34789822775536e-253	-1.1671	0.498	0.528	5.52836116707276e-249	CD4 TCM	DBI
6.45457372169733e-253	0.334255	0.426	0.284	1.51979392851085e-248	CD4 TCM	SHISA5
2.16761009930678e-252	0.211545	0.884	0.773	5.10385473982773e-248	CD4 TCM	HSPA8
2.23521050334301e-252	0.240175	0.974	0.774	5.26302665117146e-248	CD4 TCM	MT-CO2
4.36609503124799e-252	0.444566	0.378	0.249	1.02804073605765e-247	CD4 TCM	STK38
7.70182901332253e-252	-1.71862	0.081	0.158	1.81347265947692e-247	CD4 TCM	DDAH2
8.74405977116808e-252	-6.5214	0.001	0.036	2.05887631371924e-247	CD4 TCM	APOC2
1.09039632176136e-251	-3.0309	0.009	0.052	2.56744717921929e-247	CD4 TCM	EVI5
1.99208817839155e-251	-5.66739	0	0.033	4.69057082484074e-247	CD4 TCM	TFEC
3.31153763801007e-251	-1.89566	0.114	0.193	7.7973465224585e-247	CD4 TCM	TYMP
4.21725940108936e-251	0.352454	0.431	0.291	9.92995898580501e-247	CD4 TCM	IMP3
5.84082736598799e-251	1.44061	0.093	0.033	1.37528121159553e-246	CD4 TCM	MFHAS1
1.25054348153841e-250	0.147713	0.939	0.943	2.94452968163034e-246	CD4 TCM	RPL3
2.14659689583862e-250	0.432103	0.339	0.216	5.05437705094161e-246	CD4 TCM	TES
2.20745742176918e-250	0.252634	0.555	0.395	5.1976792452977e-246	CD4 TCM	ANXA11
3.45118228779656e-250	0.406649	0.419	0.283	8.12615381484578e-246	CD4 TCM	ARID4B
4.39655345286875e-250	1.02296	0.088	0.03	1.03521247601248e-245	CD4 TCM	AL136456.1
4.66379880833927e-250	0.382131	0.718	0.545	1.09813806741156e-245	CD4 TCM	MBNL1
8.10697549064746e-250	0.129829	0.932	0.92	1.90886844902785e-245	CD4 TCM	RPL9
1.00121893314969e-249	0.810303	0.196	0.106	2.35747009999427e-245	CD4 TCM	SESN3
1.08534942498166e-249	0.102027	0.949	0.961	2.55556375606181e-245	CD4 TCM	RPL18A
1.42770693794515e-249	0.611299	0.248	0.143	3.36167875608565e-245	CD4 TCM	RASGRP1
3.64098364732653e-249	0.156359	0.506	0.354	8.57306009599505e-245	CD4 TCM	JUNB
7.39748740243952e-249	0.314241	0.476	0.331	1.74181238377841e-244	CD4 TCM	FDFT1
9.06351544871689e-249	0.584174	0.217	0.119	2.13409534755488e-244	CD4 TCM	ATP6V0E2
1.40192156718246e-248	0.846155	0.208	0.115	3.30096452208783e-244	CD4 TCM	TMEM131L
9.17195774417888e-248	-6.54202	0.001	0.033	2.15962917044436e-243	CD4 TCM	MILR1
1.25446680562215e-247	1.47876	0.075	0.022	2.9537675405179e-243	CD4 TCM	FBXL8
3.09008596825092e-247	1.25994	0.1	0.038	7.27591642084362e-243	CD4 TCM	AP3M2
3.7459826714001e-247	-3.12138	0.012	0.057	8.82029079807868e-243	CD4 TCM	FBP1
1.11269084473687e-246	0.890258	0.15	0.071	2.61994186301742e-242	CD4 TCM	NIPAL3
1.72909086986221e-246	-6.46573	0.001	0.032	4.07131736217755e-242	CD4 TCM	ARHGEF10L
5.82863092032299e-246	-5.77682	0.001	0.033	1.37240943649925e-241	CD4 TCM	PID1
8.6566436392653e-246	0.38263	0.426	0.293	2.03829331130141e-241	CD4 TCM	TPR
1.47213162781756e-245	0.590218	0.203	0.111	3.46628113085922e-241	CD4 TCM	LPAR6
2.2271568282799e-245	0.543704	0.402	0.273	5.24406346786784e-241	CD4 TCM	TNRC6B
3.50065932784532e-245	-3.74808	0.002	0.037	8.24265245334458e-241	CD4 TCM	AC022075.1
4.27872623940126e-245	0.255468	0.37	0.239	1.00746888032942e-240	CD4 TCM	PPA1
4.88845265107242e-245	0.420544	0.367	0.241	1.15103506122151e-240	CD4 TCM	SPSB3
2.99621412713e-244	2.08946	0.06	0.014	7.0548857837403e-240	CD4 TCM	GPR25
4.49242489536018e-244	-4.24715	0.003	0.04	1.05778636586151e-239	CD4 TCM	CEBPA
6.68290095266036e-244	-3.50032	0.004	0.04	1.57355585831341e-239	CD4 TCM	GRK3
9.5173490742463e-244	-2.47014	0.03	0.087	2.24095501302203e-239	CD4 TCM	C3AR1
1.35823932672072e-243	1.43798	0.081	0.026	3.1981103186966e-239	CD4 TCM	SOCS3
1.77591948598353e-243	0.689011	0.193	0.102	4.18158002169683e-239	CD4 TCM	PLCG1
3.8903403973858e-243	0.235911	0.587	0.424	9.16019549968461e-239	CD4 TCM	LRRFIP1
1.50369994145136e-242	0.34588	0.507	0.361	3.54061188214137e-238	CD4 TCM	FNBP1
2.13614122502169e-242	0.269754	0.553	0.398	5.02975812843607e-238	CD4 TCM	DAD1
3.45831313711376e-242	0.13663	0.94	0.939	8.14294411264806e-238	CD4 TCM	RPLP2
3.70323419732899e-242	1.73606	0.076	0.023	8.71963524103083e-238	CD4 TCM	TRAV9-2
7.91475025906973e-242	-6.37408	0.001	0.033	1.86360709600056e-237	CD4 TCM	VCAN
2.57200058117375e-241	0.769505	0.206	0.115	6.05603256843172e-237	CD4 TCM	LRRC8C
4.35362505364861e-241	0.249802	0.633	0.473	1.0251045551321e-236	CD4 TCM	ANXA1
1.12821674289957e-240	0.212912	0.82	0.622	2.65649914283132e-236	CD4 TCM	MT-ND2
1.7240126482502e-240	0.2912	0.357	0.231	4.05936018156991e-236	CD4 TCM	PDCD5
1.97486037288913e-240	-1.99914	0.021	0.072	4.65000623400474e-236	CD4 TCM	LINC02084
5.01956725231413e-240	0.493414	0.24	0.139	1.18190730522988e-235	CD4 TCM	HTATSF1
5.5298546728492e-240	0.118314	0.942	0.947	1.30205958126907e-235	CD4 TCM	RPL35A
8.53351941441295e-240	0.659116	0.194	0.105	2.00930248131767e-235	CD4 TCM	CERK
8.81469971377878e-240	0.510339	0.252	0.148	2.07550919460635e-235	CD4 TCM	PXN
5.28933638535354e-239	0.227921	0.525	0.363	1.24542714529535e-234	CD4 TCM	SLC9A3R1
9.53859515560797e-239	1.65215	0.065	0.017	2.24595761533945e-234	CD4 TCM	CBR3
1.0479692919131e-238	-2.49451	0.024	0.076	2.46754849473859e-234	CD4 TCM	MPP1
1.67376412623699e-238	0.368863	0.418	0.285	3.94104501163762e-234	CD4 TCM	GCC2
1.91471803889769e-238	1.1308	0.094	0.034	4.5083950943885e-234	CD4 TCM	AC013264.1
4.35701537880119e-238	-5.13103	0.002	0.035	1.02590284109253e-233	CD4 TCM	BANK1
8.96697316997758e-238	1.4398	0.078	0.025	2.11136350260292e-233	CD4 TCM	AC018816.1
5.08166962661766e-237	0.633647	0.19	0.102	1.19652993028339e-232	CD4 TCM	UBQLN2
7.94078275775183e-237	-4.32118	0.002	0.034	1.86973670814025e-232	CD4 TCM	OSCAR
1.03968097322705e-236	-5.07609	0.001	0.033	2.44803281956042e-232	CD4 TCM	RIN2
5.22145500618562e-236	0.874051	0.132	0.06	1.22944379575647e-231	CD4 TCM	SLC39A8
9.40008112494947e-236	0.703686	0.159	0.079	2.2133431016806e-231	CD4 TCM	BNIP3
1.72249019899824e-235	0.221759	0.611	0.45	4.05577542256126e-231	CD4 TCM	HNRNPF
1.06576779234536e-234	0.265931	0.556	0.404	2.50945684385639e-230	CD4 TCM	EIF4A2
1.16442913198026e-234	0.536395	0.254	0.149	2.74176483416073e-230	CD4 TCM	AC006369.1
1.79846811303891e-234	-2.89694	0.011	0.054	4.23467301896142e-230	CD4 TCM	ZNF683
3.14154433001032e-234	-5.13016	0.001	0.032	7.3970802794423e-230	CD4 TCM	PLXNB2
3.34595279779356e-234	0.681997	0.196	0.106	7.87838045768472e-230	CD4 TCM	CASP8AP2
1.02773086951041e-233	1.02438	0.158	0.08	2.4198951053492e-229	CD4 TCM	KAT2B
1.12989353017199e-233	-3.99814	0.005	0.043	2.66044730614297e-229	CD4 TCM	MGLL
1.15080478758978e-233	0.747043	0.181	0.096	2.7096849528589e-229	CD4 TCM	RAB3GAP1
3.18912067114416e-233	-3.06964	0.009	0.05	7.50910353227604e-229	CD4 TCM	GAS6
7.95477335569618e-233	-2.12376	0.022	0.073	1.87303093433222e-228	CD4 TCM	HAVCR2
1.25138572242462e-232	0.843048	0.165	0.084	2.94651282202101e-228	CD4 TCM	AC079793.1
1.98421692965194e-232	-6.26836	0.001	0.033	4.67203718255846e-228	CD4 TCM	FCN1
2.23479044649333e-232	0.79587	0.147	0.071	5.26203758531318e-228	CD4 TCM	LTBP4
6.94905560436843e-232	0.40792	0.284	0.175	1.63622463260459e-227	CD4 TCM	CLPP
7.62661764771707e-232	-5.2353	0.001	0.031	1.79576339133146e-227	CD4 TCM	NCR1
8.8616734533494e-232	2.08818	0.05	0.01	2.08656963132565e-227	CD4 TCM	F5
1.28029995299911e-231	-3.18574	0.006	0.044	3.01459426933171e-227	CD4 TCM	PDLIM1
3.22425686437303e-231	0.772855	0.166	0.085	7.59183521285274e-227	CD4 TCM	CD320
6.64510125573072e-231	0.389819	0.346	0.225	1.56465554167436e-226	CD4 TCM	TRABD
6.99022266816205e-231	-1.63177	0.292	0.353	1.64591782944544e-226	CD4 TCM	YWHAH
1.12043333239926e-230	0.722051	0.168	0.086	2.63817232446729e-226	CD4 TCM	PIM3
1.40083263373629e-230	-1.16758	0.346	0.403	3.29840051939546e-226	CD4 TCM	SEC11A
2.21629606668158e-230	-0.825839	0.623	0.623	5.21849071860845e-226	CD4 TCM	NME2
2.45360859316076e-230	0.608056	0.224	0.127	5.77726679345632e-226	CD4 TCM	SLC44A2
3.60310384651781e-230	0.411729	0.295	0.184	8.48386831701084e-226	CD4 TCM	TRAPPC6A
5.16578454377572e-230	0.449443	0.359	0.239	1.21633562867743e-225	CD4 TCM	FNBP4
6.15251755709621e-230	0.311449	0.459	0.322	1.44867178399387e-225	CD4 TCM	FLNA
6.4617893330335e-230	0.696491	0.203	0.113	1.52149291635607e-225	CD4 TCM	WWP1
8.8447460664e-230	0.422458	0.255	0.15	2.08258390879454e-225	CD4 TCM	SELENOM
3.766727828908e-229	0.560826	0.216	0.12	8.86913734594677e-225	CD4 TCM	KCNA3
3.85218120875524e-229	0.330641	0.388	0.259	9.0703458741351e-225	CD4 TCM	RNF167
1.25074804595206e-228	0.172769	0.686	0.517	2.94501134899872e-224	CD4 TCM	SUB1
2.499020944085e-228	0.105768	0.957	0.97	5.88419471494255e-224	CD4 TCM	RPS8
2.53129363541474e-228	0.365871	0.371	0.247	5.96018399394756e-224	CD4 TCM	TAF1D
3.5058729918812e-228	-1.79867	0.064	0.132	8.25492854668346e-224	CD4 TCM	PLSCR1
9.75143331386252e-228	-6.74633	0.001	0.03	2.29607248808207e-223	CD4 TCM	SLC1A3
1.20741555025821e-227	0.246151	0.907	0.704	2.84298065463797e-223	CD4 TCM	MT-ND3
2.26328965769776e-227	1.67875	0.088	0.032	5.32914182801514e-223	CD4 TCM	TAFA1
2.30605051716529e-227	0.677753	0.206	0.116	5.42982654771739e-223	CD4 TCM	SPTBN1
2.53066672772648e-227	0.666025	0.244	0.144	5.95870787710476e-223	CD4 TCM	SLFN12L
5.27925970269914e-227	0.100828	0.95	0.962	1.24305448959754e-222	CD4 TCM	RPS3A
2.02732772740792e-226	0.472495	0.259	0.156	4.77354586695469e-222	CD4 TCM	AKIRIN1
2.05637077543857e-226	-2.76161	0.005	0.041	4.84193062784765e-222	CD4 TCM	TRIO
2.13597752537275e-226	-1.9043	0.098	0.169	5.02937268124267e-222	CD4 TCM	CTSH
5.15498909490372e-226	0.391826	0.322	0.207	1.21379373228603e-221	CD4 TCM	TMEM243
9.08587225558611e-226	0.703268	0.191	0.105	2.13935948130031e-221	CD4 TCM	CA5B
3.78650024229344e-225	0.601406	0.234	0.137	8.91569347050414e-221	CD4 TCM	NLRC3
5.63844420575638e-225	0.332555	0.433	0.299	1.3276280726874e-220	CD4 TCM	EMB
8.26798706357866e-225	0.838652	0.125	0.056	1.94678023399023e-220	CD4 TCM	NSG1
1.46999293903131e-224	-2.0487	0.041	0.101	3.46124537424311e-220	CD4 TCM	TNFSF13B
1.74758571417829e-224	1.13277	0.098	0.038	4.11486532260421e-220	CD4 TCM	OLFM2
4.55996039715793e-224	1.29025	0.084	0.03	1.07368827511481e-219	CD4 TCM	SOCS2
5.19424307417526e-224	0.169646	0.905	0.694	1.22303647424531e-219	CD4 TCM	PTPRC
1.64839068853263e-223	-2.39545	0.014	0.057	3.88130071521892e-219	CD4 TCM	BMP2K
3.81998477700518e-223	1.04179	0.116	0.05	8.9945361559364e-219	CD4 TCM	AMMECR1
4.87121064565368e-223	-1.5844	0.173	0.252	1.14697525862562e-218	CD4 TCM	DUSP2
6.72518715127293e-223	0.354025	0.44	0.307	1.58351256663872e-218	CD4 TCM	OSBPL8
1.14837527494423e-222	0.136932	0.821	0.651	2.70396442238367e-218	CD4 TCM	S100A10
2.58309183653813e-222	0.295776	0.418	0.285	6.08214803831269e-218	CD4 TCM	VSIR
3.12600509003039e-222	0.235414	0.605	0.45	7.36049158498556e-218	CD4 TCM	ANAPC16
3.38741542282295e-222	0.710778	0.25	0.152	7.97600835457891e-218	CD4 TCM	CASK
6.98993084983112e-222	0.602804	0.2	0.112	1.64584911790124e-217	CD4 TCM	STN1
1.70452100964535e-221	0.782271	0.146	0.072	4.01346516931095e-217	CD4 TCM	ELK3
1.83771150529332e-221	-2.31496	0.019	0.067	4.32707551036365e-217	CD4 TCM	SWAP70
3.19800112568212e-221	-1.22799	0.115	0.194	7.53001345053111e-217	CD4 TCM	ID2
6.00346433840813e-220	1.02899	0.175	0.094	1.41357571312158e-215	CD4 TCM	MGAT5
8.29011835848472e-220	2.50979	0.041	0.006	1.95199126868881e-215	CD4 TCM	AC005842.1
8.80001728635278e-220	0.253935	0.676	0.512	2.07205207024463e-215	CD4 TCM	AHNAK
9.65975350055111e-220	0.801068	0.138	0.066	2.27448555923976e-215	CD4 TCM	BEX2
1.57784697713119e-219	0.862594	0.172	0.092	3.71519849235309e-215	CD4 TCM	GPHN
1.80855403519125e-219	-2.43344	0.02	0.067	4.25842133126132e-215	CD4 TCM	EPS8
2.24584976499186e-219	0.853009	0.179	0.096	5.28807785664984e-215	CD4 TCM	FOXO1
2.29219815821443e-219	0.42646	0.332	0.216	5.39720978333171e-215	CD4 TCM	PPP3CC
1.11723050222476e-218	0.397892	0.285	0.178	2.63063094053841e-214	CD4 TCM	MFNG
3.55487192043056e-218	0.103022	0.948	0.955	8.3703014238458e-214	CD4 TCM	RPS15
5.86581810518166e-218	-6.28451	0	0.028	1.38116553104607e-213	CD4 TCM	KLF4
2.94825117890328e-217	0.241108	0.52	0.369	6.94195222584565e-213	CD4 TCM	LCP2
3.22099175874277e-217	-5.03528	0.002	0.032	7.58414719513573e-213	CD4 TCM	BCAT1
4.61262887255259e-217	0.199107	0.571	0.418	1.08608959433123e-212	CD4 TCM	NAP1L1
7.07661101283157e-217	0.264066	0.348	0.227	1.66625882908132e-212	CD4 TCM	ABHD14B
8.4577842226174e-217	-6.4664	0.001	0.029	1.99146987305749e-212	CD4 TCM	RNASE2
1.04596895566308e-216	-1.897	0.037	0.093	2.46283850300429e-212	CD4 TCM	HVCN1
2.80314406702787e-216	-3.68963	0.002	0.033	6.60028302022382e-212	CD4 TCM	GOLIM4
2.13859954473727e-215	-2.63131	0.025	0.075	5.03554648803838e-211	CD4 TCM	PLAUR
2.65104765762401e-215	0.186852	0.858	0.656	6.24215681464149e-211	CD4 TCM	MT-ND1
2.71613323941262e-215	1.38738	0.067	0.02	6.39540732552096e-211	CD4 TCM	GCSAM
3.71752985598591e-215	0.371318	0.366	0.246	8.75329579890442e-211	CD4 TCM	TRIM22
6.13724553741632e-215	0.346342	0.541	0.397	1.44507583424005e-210	CD4 TCM	CELF2
6.46495026927071e-215	2.93058	0.035	0.004	1.52223719040248e-210	CD4 TCM	NEFL
2.42041087236571e-214	0.832972	0.11	0.047	5.69909944007231e-210	CD4 TCM	FAM153CP
6.21556377215993e-214	1.12652	0.098	0.04	1.46351664579278e-209	CD4 TCM	ADPRM
1.93564296859374e-213	0.185278	0.435	0.3	4.55766493385081e-209	CD4 TCM	CMPK1
4.41520783715294e-213	0.368995	0.309	0.199	1.03960483733603e-208	CD4 TCM	SNHG7
5.29353166227345e-213	-6.79368	0	0.028	1.24641496519891e-208	CD4 TCM	LMO2
8.23989169314874e-213	-6.0094	0.001	0.028	1.9401648980688e-208	CD4 TCM	TNS3
1.0793678467953e-212	-6.05682	0.001	0.029	2.54147953206421e-208	CD4 TCM	LGALS2
1.8523384563222e-212	2.4001	0.04	0.006	4.36151612925626e-208	CD4 TCM	WNT7A
2.27763801203393e-212	-5.26234	0.001	0.029	5.36292646313509e-208	CD4 TCM	CREB5
2.07555727729376e-211	0.204097	0.644	0.482	4.88710716511589e-207	CD4 TCM	ERP29
2.63650285052956e-211	-1.09482	0.068	0.137	6.20790961185691e-207	CD4 TCM	ARHGAP26
3.26759718516579e-211	0.407277	0.297	0.19	7.69388433219137e-207	CD4 TCM	TMEM35B
6.02874053760711e-211	0.255056	0.476	0.337	1.41952724698497e-206	CD4 TCM	IL16
7.21660070270599e-211	1.17472	0.106	0.046	1.69922080145915e-206	CD4 TCM	TRBV20-1
9.93565711561831e-211	0.311844	0.48	0.346	2.33944982444349e-206	CD4 TCM	ARGLU1
1.6748069759044e-210	0.262265	0.403	0.274	3.9435005054645e-206	CD4 TCM	MAX
2.00575863483656e-210	0.613246	0.158	0.082	4.72275928158617e-206	CD4 TCM	PLIN2
5.89768774541408e-210	0.366167	0.354	0.237	1.3886695565352e-205	CD4 TCM	ORMDL1
9.43358725282533e-210	0.476047	0.266	0.164	2.22123245455025e-205	CD4 TCM	SCML4
1.14642188144889e-209	-4.61234	0.002	0.031	2.69936496205957e-205	CD4 TCM	SOX4
1.32284803817601e-209	0.636922	0.153	0.078	3.11477799068922e-205	CD4 TCM	MAP4K2
1.46933692635661e-209	-6.55583	0.001	0.028	3.45970072679927e-205	CD4 TCM	AC092809.2
2.05860787177935e-209	-5.62298	0.001	0.029	4.84719809489166e-205	CD4 TCM	EBI3
2.96885631138846e-209	0.623639	0.211	0.123	6.99046907079526e-205	CD4 TCM	SNHG25
2.97786253802417e-209	-5.29823	0.001	0.029	7.01167513203171e-205	CD4 TCM	ARHGAP6
3.39708792028169e-209	0.255533	0.499	0.36	7.99878321709527e-205	CD4 TCM	HP1BP3
5.70990908644335e-209	0.693324	0.194	0.109	1.34445519349395e-204	CD4 TCM	HELB
3.63028250705768e-208	0.54499	0.239	0.144	8.547863191118e-204	CD4 TCM	PCSK7
4.27527288496582e-207	0.492224	0.233	0.139	1.00665575349405e-202	CD4 TCM	ASF1A
1.29659206043735e-206	-2.12848	0.044	0.101	3.05295566550578e-202	CD4 TCM	ETS2
2.96654611027094e-206	0.508095	0.226	0.135	6.98502947124395e-202	CD4 TCM	ZNFX1
4.38618728155261e-206	-1.70008	0.056	0.118	1.03277165731438e-201	CD4 TCM	ARHGAP18
1.3051501605153e-205	0.901681	0.127	0.06	3.07310656794934e-201	CD4 TCM	PBX4
1.66107193770691e-205	0.469361	0.32	0.211	3.91115998452469e-201	CD4 TCM	CCM2
1.72779906224355e-205	0.571363	0.193	0.11	4.06827567195866e-201	CD4 TCM	UBE2Q2
3.71461486194706e-205	-2.85718	0.01	0.048	8.74643215394055e-201	CD4 TCM	MCTP1
4.09767576902044e-205	0.193394	0.664	0.513	9.64838736573553e-201	CD4 TCM	SNHG6
2.89915767628814e-204	0.316625	0.418	0.292	6.82635666458805e-200	CD4 TCM	USP15
4.42915131470713e-204	0.516025	0.277	0.177	1.04288796856094e-199	CD4 TCM	USP3
4.7047344228026e-204	0.320451	0.353	0.234	1.1077767671931e-199	CD4 TCM	HDAC1
8.21067166369404e-204	-7.04006	0	0.027	1.9332847499334e-199	CD4 TCM	TLR4
1.10385254262858e-203	0.262161	0.507	0.368	2.59913119687326e-199	CD4 TCM	PRMT2
1.33362377477198e-203	0.230936	0.485	0.343	3.1401505400781e-199	CD4 TCM	TECR
1.67097409560985e-203	-1.92799	0.017	0.061	3.93447560552295e-199	CD4 TCM	MAML3
1.88024649128165e-203	-6.08734	0.001	0.027	4.42722838837178e-199	CD4 TCM	STEAP3
2.33646651244034e-203	0.207998	0.667	0.509	5.50144405019202e-199	CD4 TCM	HNRNPDL
2.82338007297118e-203	0.259736	0.534	0.389	6.64793071981795e-199	CD4 TCM	KMT2E
2.79429298359165e-202	-5.57642	0.001	0.027	6.57944225916491e-198	CD4 TCM	DOK3
6.00971145915292e-202	-3.66515	0.004	0.036	1.41504666017215e-197	CD4 TCM	RGS18
6.26189931296593e-202	-6.34465	0	0.027	1.47442681223096e-197	CD4 TCM	SORT1
1.93204444506448e-201	0.614846	0.174	0.094	4.54919185034882e-197	CD4 TCM	LINC00649
4.28283670642101e-201	0.693171	0.182	0.103	1.00843673089389e-196	CD4 TCM	BHLHE40
1.40902173871953e-200	0.280914	0.337	0.222	3.317682585989e-196	CD4 TCM	JPT1
1.96155107352961e-200	0.649125	0.306	0.203	4.61866815773281e-196	CD4 TCM	MAML2
3.39722783783705e-200	0.685366	0.14	0.07	7.99911266697112e-196	CD4 TCM	SGTB
4.22238486400145e-200	0.5324	0.317	0.212	9.94202740077782e-196	CD4 TCM	ELMO1
1.30251855701815e-199	0.416917	0.35	0.238	3.06691019435494e-195	CD4 TCM	DIAPH1
2.0102753300262e-199	0.400699	0.254	0.157	4.73339429207969e-195	CD4 TCM	RNF126
3.18433343196921e-199	1.13764	0.089	0.036	7.4978314989147e-195	CD4 TCM	RIC3
3.80158252007667e-199	0.906337	0.149	0.078	8.95120620177253e-195	CD4 TCM	ESYT2
4.02052624267392e-199	0.369845	0.415	0.29	9.466731091e-195	CD4 TCM	IQGAP2
4.44302961350449e-199	-1.4311	0.231	0.297	1.04615575279577e-194	CD4 TCM	CTSS
8.19021110965507e-199	0.335841	0.388	0.268	1.92846710787938e-194	CD4 TCM	ZRANB2
1.6764809678258e-198	-3.03122	0.007	0.041	3.94744208684262e-194	CD4 TCM	SULF2
3.54452185556843e-198	1.16131	0.079	0.029	8.34593116112143e-194	CD4 TCM	INF2
3.66574414637878e-198	0.42714	0.289	0.187	8.63136116706348e-194	CD4 TCM	GPRIN3
4.46929354504059e-198	0.185268	0.923	0.909	1.05233985811526e-193	CD4 TCM	RPS29
5.43295157178271e-198	-4.36931	0.002	0.03	1.27924277709196e-193	CD4 TCM	HSPA6
8.63803162650553e-198	0.922501	0.109	0.049	2.03391092677699e-193	CD4 TCM	SH2D3A
9.45243986602213e-198	1.03627	0.1	0.043	2.22567149085357e-193	CD4 TCM	TRAV8-3
1.27741961666323e-197	0.710233	0.155	0.082	3.00781222939524e-193	CD4 TCM	LDLR
2.43748390288239e-197	0.669036	0.172	0.094	5.73929959772687e-193	CD4 TCM	TXK
2.5677983503797e-197	-6.22297	0	0.026	6.04613799580403e-193	CD4 TCM	P2RY6
2.92161560820988e-197	0.198766	0.867	0.738	6.87923611109098e-193	CD4 TCM	CORO1A
6.497022496395e-197	-2.18118	0.012	0.051	1.52978891700117e-192	CD4 TCM	FCRL3
6.8807733603723e-197	2.19177	0.044	0.009	1.62014689543326e-192	CD4 TCM	LINC02762
1.36885585339187e-196	0.203708	0.573	0.421	3.22310799239649e-192	CD4 TCM	SRSF7
2.29887613115626e-196	0.448641	0.306	0.203	5.41293373842053e-192	CD4 TCM	KMT2A
7.16690801200926e-196	-2.67738	0.014	0.055	1.6875201605077e-191	CD4 TCM	CDKN1A
1.78307000626188e-195	-0.438437	0.729	0.708	4.19841663674423e-191	CD4 TCM	CLIC1
2.36929597450279e-195	0.483201	0.215	0.128	5.57874430156427e-191	CD4 TCM	REXO2
4.86249259831816e-195	-5.48914	0	0.026	1.14492250719999e-190	CD4 TCM	P2RY12
5.85318682420461e-195	-5.4299	0.001	0.026	1.37819136962722e-190	CD4 TCM	SYNGR1
8.12244276751671e-195	0.32745	0.335	0.223	1.91251037403949e-190	CD4 TCM	RASSF5
1.38158166879412e-194	0.236343	0.563	0.418	3.25307219734264e-190	CD4 TCM	FUS
2.67762673205686e-194	0.218296	0.575	0.427	6.30473990330109e-190	CD4 TCM	RCSD1
5.14977213385713e-194	0.338698	0.316	0.209	1.212565346638e-189	CD4 TCM	IRF9
5.72230431398252e-194	0.375259	0.487	0.356	1.34737377377032e-189	CD4 TCM	ANKRD44
6.93020112653068e-194	0.377482	0.282	0.179	1.63178515725291e-189	CD4 TCM	MRFAP1L1
1.2942468845971e-193	0.591666	0.195	0.114	3.04743371447233e-189	CD4 TCM	CNIH4
1.31165358349823e-193	-1.23486	0.161	0.235	3.08841952770493e-189	CD4 TCM	IFNGR1
3.15757114663433e-193	0.519438	0.207	0.122	7.43481702186519e-189	CD4 TCM	SNX20
3.62922372256165e-193	-5.56167	0.001	0.027	8.54537017714366e-189	CD4 TCM	PLTP
4.05034058082342e-193	0.296545	0.339	0.227	9.53693193160683e-189	CD4 TCM	HAX1
6.06259790931752e-193	0.470309	0.241	0.148	1.4274993037279e-188	CD4 TCM	RSBN1
9.36619192557547e-193	-5.39125	0.001	0.026	2.205363550796e-188	CD4 TCM	SERPING1
9.76918630318032e-193	0.536505	0.175	0.098	2.30025260694684e-188	CD4 TCM	TACC3
1.22579637128045e-192	0.353761	0.254	0.159	2.88626013581695e-188	CD4 TCM	PNP
1.8228827785649e-192	0.94749	0.152	0.081	4.29215979040892e-188	CD4 TCM	ARHGEF18
2.37167130694711e-192	0.141517	0.461	0.324	5.58433725933767e-188	CD4 TCM	CALM3
2.92200787038342e-192	0.668048	0.154	0.081	6.88015973160481e-188	CD4 TCM	AKTIP
3.63795922794745e-192	1.34843	0.083	0.032	8.56593879812506e-188	CD4 TCM	TRAV13-1
5.54628020781963e-192	0.402222	0.298	0.195	1.30592713773321e-187	CD4 TCM	CASP8
7.11352861958752e-192	-5.80331	0	0.025	1.67495144876808e-187	CD4 TCM	TNFAIP2
7.30315164908905e-192	1.72711	0.051	0.013	1.71960008729451e-187	CD4 TCM	PI16
1.05257229238857e-191	-6.05193	0	0.025	2.47838671965813e-187	CD4 TCM	CD180
1.85141596553133e-191	4.05461	0.027	0.001	4.35934403244007e-187	CD4 TCM	ST6GALNAC1
4.43297351608736e-191	0.95011	0.132	0.066	1.04378794409793e-186	CD4 TCM	PCAT1
6.79103557172618e-191	0.20646	0.42	0.293	1.59901723571865e-186	CD4 TCM	NOL7
6.89361700074938e-191	-5.83948	0	0.025	1.62317105899645e-186	CD4 TCM	PTGS1
2.46216430477619e-190	-1.38904	0.117	0.188	5.79741207202603e-186	CD4 TCM	PTPRE
2.86976624680215e-190	1.35761	0.066	0.022	6.75715160472034e-186	CD4 TCM	PTP4A3
4.87825789567828e-190	-6.11658	0	0.025	1.14863460411641e-185	CD4 TCM	MLXIPL
6.50833018563433e-190	-3.7707	0.004	0.033	1.53245142550946e-185	CD4 TCM	CCR5AS
6.74811540435467e-190	-5.74489	0.001	0.025	1.58891125310935e-185	CD4 TCM	FPR3
6.90654539431057e-190	-4.87629	0.002	0.029	1.62621517854437e-185	CD4 TCM	HTRA1
1.14455580432673e-189	0.429523	0.29	0.19	2.69497109686772e-185	CD4 TCM	BAZ1A
1.24217703470775e-189	0.449481	0.235	0.144	2.92483004592288e-185	CD4 TCM	LINC01934
1.32810771709249e-189	-5.86848	0	0.025	3.12716243066597e-185	CD4 TCM	P2RY13
3.7426534154628e-189	-3.72651	0.003	0.032	8.81245173204871e-185	CD4 TCM	CLIC4
5.58381455170367e-189	0.413898	0.339	0.231	1.31476497434415e-184	CD4 TCM	CHD2
7.83010310517682e-189	-6.48987	0	0.025	1.84367607714493e-184	CD4 TCM	ST3GAL6
7.9655104613915e-189	0.705021	0.156	0.084	1.87555909323924e-184	CD4 TCM	ZNF101
8.51365004416568e-189	0.239863	0.41	0.285	2.00462403939925e-184	CD4 TCM	C9orf78
1.07901718153415e-188	0.540766	0.19	0.11	2.54065385564032e-184	CD4 TCM	MAPKAPK5-AS1
2.56852304723844e-188	0.636391	0.138	0.07	6.04784436702764e-184	CD4 TCM	CASP6
5.71515589352418e-188	0.249442	0.405	0.28	1.3456906066892e-183	CD4 TCM	PPP2R5C
5.82249388620767e-188	0.323952	0.344	0.232	1.37096441044646e-183	CD4 TCM	FGFR1OP2
1.41559339736774e-187	1.961	0.043	0.009	3.33315621344208e-183	CD4 TCM	ATG9B
1.9932936040642e-187	1.03904	0.097	0.042	4.69340912012956e-183	CD4 TCM	LINC00243
3.87813653908104e-187	-1.86981	0.037	0.089	9.13146029492022e-183	CD4 TCM	ALOX5
4.5397658296401e-187	-2.53533	0.008	0.042	1.06893326224706e-182	CD4 TCM	DTHD1
5.79760081766391e-187	-5.18623	0.001	0.026	1.36510308852715e-182	CD4 TCM	CNRIP1
7.59392573181577e-187	-3.89053	0.002	0.029	1.78806575281334e-182	CD4 TCM	LINC01504
1.04494227652531e-186	0.7596	0.131	0.066	2.4604210843065e-182	CD4 TCM	NFATC1
3.16510784198535e-186	0.274561	0.416	0.296	7.45256292473871e-182	CD4 TCM	EIF3A
9.3484981205876e-186	0.176129	0.799	0.635	2.20119736747356e-181	CD4 TCM	DDX5
1.5844100925105e-185	0.445518	0.267	0.17	3.73065200382522e-181	CD4 TCM	CCDC88C
1.77713728173341e-185	-6.08483	0	0.024	4.18444744356948e-181	CD4 TCM	CLEC4E
2.04236513122312e-185	1.60213	0.06	0.019	4.80895293797796e-181	CD4 TCM	SYNJ2
2.2937830207758e-185	0.455385	0.312	0.209	5.4009415007187e-181	CD4 TCM	PIK3CD
2.68004934399473e-185	0.172829	0.594	0.444	6.31044418537e-181	CD4 TCM	UCP2
5.53909899240819e-185	1.19146	0.072	0.026	1.30423624875243e-180	CD4 TCM	GRAP
6.79805413032821e-185	-5.40202	0.001	0.025	1.60066982552708e-180	CD4 TCM	STARD13
1.68247113024402e-184	0.615766	0.151	0.08	3.96154652327258e-180	CD4 TCM	APBB1
2.68945376542349e-184	-2.16187	0.024	0.068	6.33258783606615e-180	CD4 TCM	MGST2
2.71585548304924e-184	0.370796	0.335	0.227	6.39475332038774e-180	CD4 TCM	TUT4
3.83994616035064e-184	0.607179	0.229	0.141	9.04153722916161e-180	CD4 TCM	CARD11
7.54027615843374e-184	-6.75428	0	0.024	1.77543342426481e-179	CD4 TCM	ZMYND15
9.51115442894984e-184	0.161458	0.526	0.386	2.23949642184053e-179	CD4 TCM	TOMM20
1.0695897089404e-183	0.352984	0.339	0.23	2.51845592867106e-179	CD4 TCM	GPBP1
1.07775807320684e-183	0.179078	0.622	0.469	2.53768915917284e-179	CD4 TCM	KRTCAP2
1.1216370882374e-183	0.570089	0.185	0.106	2.64100668796378e-179	CD4 TCM	TMEM106B
1.24079596897956e-183	0.177523	0.62	0.464	2.92157818855927e-179	CD4 TCM	ATP6V1G1
1.53490958809763e-183	-5.495	0.001	0.026	3.61409811613467e-179	CD4 TCM	FGFBP2
1.95774941640737e-183	0.218367	0.566	0.419	4.6097167758728e-179	CD4 TCM	RNF213
2.04646052474441e-183	-5.34959	0.001	0.024	4.81859595156318e-179	CD4 TCM	IGSF21
3.39255299018807e-183	-2.4845	0.017	0.057	7.98810527069683e-179	CD4 TCM	RGS2
3.65812422937683e-183	0.468215	0.216	0.13	8.61341931049068e-179	CD4 TCM	C12orf65
4.37780494233955e-183	0.18341	0.529	0.386	1.03079795172327e-178	CD4 TCM	TSC22D3
4.62479752570938e-183	-5.83809	0.001	0.025	1.08895482540353e-178	CD4 TCM	ARPIN
5.66265519152184e-183	-2.44795	0.017	0.057	1.33332879139573e-178	CD4 TCM	GNG7
6.5068614069351e-183	0.340035	0.327	0.22	1.53210558687694e-178	CD4 TCM	MYO1G
6.74303393983091e-183	-3.62943	0.004	0.032	1.58771477147259e-178	CD4 TCM	AC090559.1
2.58607917091054e-182	1.39484	0.062	0.02	6.08918201582597e-178	CD4 TCM	PCSK1N
3.08814347726792e-182	0.338766	0.421	0.303	7.27134263157504e-178	CD4 TCM	MYCBP2
6.88230777110794e-182	0.840871	0.106	0.049	1.62050818778508e-177	CD4 TCM	CCR4
1.27382608319063e-181	0.181139	0.773	0.623	2.99935089548066e-177	CD4 TCM	SNRPD2
1.39825768690604e-181	0.127472	0.688	0.542	3.29233754958897e-177	CD4 TCM	EIF3E
2.75138104998016e-181	-1.85023	0.046	0.099	6.47840182028328e-177	CD4 TCM	EIF4EBP1
3.36391669409819e-181	-2.0586	0.021	0.063	7.9206782479236e-177	CD4 TCM	NAIP
3.83785565841865e-181	0.625646	0.166	0.093	9.03661493331256e-177	CD4 TCM	LPCAT4
5.67381122383345e-181	-5.89544	0.001	0.024	1.33595559076382e-176	CD4 TCM	ALDH3B1
8.98116189830476e-181	1.38378	0.064	0.021	2.11470438057484e-176	CD4 TCM	LINC01215
1.05698196315041e-180	0.199816	0.498	0.361	2.48876973043395e-176	CD4 TCM	BCAP31
1.09683988015441e-180	-3.48191	0.005	0.035	2.58261918181157e-176	CD4 TCM	PLB1
1.22072084153698e-180	0.410281	0.352	0.244	2.87430929348296e-176	CD4 TCM	ASH1L
2.53047725802599e-180	0.443641	0.257	0.165	5.95826175174801e-176	CD4 TCM	PTPN7
2.7780502090974e-180	1.57202	0.06	0.019	6.54119702234073e-176	CD4 TCM	EGLN3
3.83010913137354e-180	0.128724	0.923	0.904	9.01837496073215e-176	CD4 TCM	RPL10A
4.86536434987998e-180	1.29697	0.066	0.023	1.14559868982274e-175	CD4 TCM	RCAN3AS
4.88779334403048e-180	0.558668	0.246	0.157	1.15087982078542e-175	CD4 TCM	LDLRAD4
1.05400844042504e-179	-1.71765	0.048	0.103	2.48176827382481e-175	CD4 TCM	FABP5
1.10130441746605e-179	-6.78778	0	0.024	2.59313138136556e-175	CD4 TCM	GASK1B
3.99755535625712e-179	0.836404	0.104	0.048	9.41264384184302e-175	CD4 TCM	CENPK
4.39553573945343e-179	-5.0313	0.001	0.025	1.03497284521171e-174	CD4 TCM	CHST15
7.30174212843827e-179	-5.28714	0.001	0.025	1.71926820156207e-174	CD4 TCM	SPRED1
8.10304113680498e-179	-0.876257	0.447	0.476	1.9079420660721e-174	CD4 TCM	SH3BGRL
1.20289198569297e-178	0.707067	0.165	0.093	2.83232946951267e-174	CD4 TCM	ATF7IP2
1.52363490408675e-178	0.165163	0.883	0.786	3.58755074516266e-174	CD4 TCM	RPL36AL
2.58663582479751e-178	-5.10386	0.004	0.031	6.09049271306823e-174	CD4 TCM	RNASE1
3.21717256792879e-178	-4.64019	0.001	0.026	7.57515452844513e-174	CD4 TCM	SLC15A3
3.27291279855459e-178	0.533577	0.241	0.153	7.70640047547664e-174	CD4 TCM	STT3B
4.36870909279804e-178	1.13533	0.088	0.037	1.02865624299023e-173	CD4 TCM	RNF157
4.50630797847334e-178	-4.01854	0.002	0.028	1.06105527661133e-173	CD4 TCM	S1PR5
4.87163563388827e-178	0.36094	0.289	0.191	1.14707532635533e-173	CD4 TCM	CRLF3
5.17221003208105e-178	-7.82754	0	0.023	1.2178485741538e-173	CD4 TCM	SIGLEC7
1.48517132459799e-177	0.355196	0.216	0.13	3.49698440089843e-173	CD4 TCM	HNRNPLL
1.93208743718617e-177	0.292725	0.322	0.216	4.54929307959855e-173	CD4 TCM	SS18L2
3.14655171753813e-177	0.193974	0.455	0.325	7.40887067411527e-173	CD4 TCM	HNRNPA0
4.96861881753154e-177	0.293254	0.341	0.231	1.16991098677598e-172	CD4 TCM	PSMB8-AS1
6.03321160468812e-177	0.268319	0.405	0.287	1.42058000443987e-172	CD4 TCM	ARHGAP30
1.09411822235841e-176	1.2362	0.066	0.023	2.57621076636512e-172	CD4 TCM	LDOC1
1.50860592513257e-176	-6.94738	0	0.023	3.55216351131715e-172	CD4 TCM	RUBCNL
1.92617376021054e-176	0.135675	0.663	0.509	4.53536873579175e-172	CD4 TCM	RAN
4.53841561175273e-176	0.837745	0.148	0.081	1.0686153399433e-171	CD4 TCM	SLCO3A1
6.73898653933238e-176	-6.85818	0	0.023	1.5867617705512e-171	CD4 TCM	TLR7
1.12304539943518e-175	-1.16461	0.093	0.159	2.64432269751008e-171	CD4 TCM	ANTKMT
3.29553684785941e-175	0.20592	0.424	0.297	7.75967106196977e-171	CD4 TCM	BUB3
1.1250216258583e-174	0.307041	0.272	0.177	2.64897592024595e-170	CD4 TCM	MVP
2.6529754482729e-174	-3.57132	0.002	0.027	6.24669599050337e-170	CD4 TCM	PDGFD
2.88396267746679e-174	-6.55606	0	0.023	6.79057852036331e-170	CD4 TCM	LILRA5
3.05110845105512e-174	-3.22156	0.005	0.033	7.18413995885439e-170	CD4 TCM	ADAM9
3.14794821249071e-174	-6.38067	0	0.023	7.41215886113064e-170	CD4 TCM	SIRPB2
3.99551469069917e-174	0.498065	0.299	0.202	9.40783889072027e-170	CD4 TCM	LRBA
4.05571682502312e-174	-5.69515	0.001	0.023	9.54959083619943e-170	CD4 TCM	NFAM1
4.10423404020136e-174	0.283107	0.272	0.176	9.66382947105812e-170	CD4 TCM	SEC11C
4.24675396293166e-174	-4.6719	0.001	0.025	9.99940688111889e-170	CD4 TCM	WDFY3
4.40411297809738e-174	1.90806	0.037	0.007	1.03699244182281e-169	CD4 TCM	RORC
4.58144169940251e-174	-7.7111	0	0.022	1.07874626254131e-169	CD4 TCM	LINC02397
6.26271411495185e-174	0.617271	0.163	0.092	1.47461866550656e-169	CD4 TCM	U2AF1L4
6.58019492421499e-174	-1.12221	0.135	0.205	1.54937269685566e-169	CD4 TCM	CD81
7.13111121892445e-174	-4.14948	0.003	0.029	1.67909144760795e-169	CD4 TCM	FMNL2
7.66470315033165e-174	0.284398	0.36	0.25	1.80473100377709e-169	CD4 TCM	NME3
9.74297325488369e-174	0.559087	0.215	0.133	2.29408048259491e-169	CD4 TCM	SP140L
1.03332686802505e-173	0.712866	0.123	0.062	2.43307144345179e-169	CD4 TCM	ENO2
1.49496117934889e-173	0.289757	0.433	0.313	3.52003559289489e-169	CD4 TCM	RSRP1
1.72645330262243e-173	0.38769	0.237	0.15	4.06510694635478e-169	CD4 TCM	NAAA
3.0925704168821e-173	0.901583	0.111	0.054	7.28176630359059e-169	CD4 TCM	LINC00426
5.47567234593596e-173	-6.61148	0	0.023	1.28930181057408e-168	CD4 TCM	CBFA2T3
6.45651186135976e-173	0.451884	0.295	0.198	1.52025028287577e-168	CD4 TCM	ZNF292
8.28292557723441e-173	0.353943	0.242	0.153	1.95029765641561e-168	CD4 TCM	TMBIM1
1.81665906191238e-172	-2.38212	0.018	0.058	4.27750542717889e-168	CD4 TCM	NR4A2
5.8524924830309e-172	0.276186	0.389	0.276	1.37802788005446e-167	CD4 TCM	PPIG
1.07532242232252e-171	0.132446	0.669	0.524	2.53195417560061e-167	CD4 TCM	EIF4B
2.315525498104e-171	0.244747	0.373	0.261	5.45213633783568e-167	CD4 TCM	HNRNPUL1
1.14817229429359e-170	0.429551	0.267	0.175	2.7034864841437e-166	CD4 TCM	RNF216
2.44543025900921e-170	0.516226	0.203	0.124	5.75801008786308e-166	CD4 TCM	MTERF4
3.19608884424988e-170	-1.846	0.018	0.058	7.52551079267078e-166	CD4 TCM	CPNE2
4.16473987750275e-170	-5.48229	0	0.022	9.80629651556798e-166	CD4 TCM	KLRC3
4.72467197227596e-170	-3.72575	0.003	0.029	1.1124712625921e-165	CD4 TCM	SCRN1
5.45450648778512e-170	0.326746	0.303	0.204	1.28431809761388e-165	CD4 TCM	NOP58
5.64667894537719e-170	-6.26589	0.001	0.023	1.32956702447851e-165	CD4 TCM	PALD1
6.84606992476681e-170	1.50055	0.069	0.026	1.61197562448559e-165	CD4 TCM	TRBV5-1
7.33141166817117e-170	2.4489	0.035	0.007	1.72625419138758e-165	CD4 TCM	AK5
1.37873006924687e-169	-3.34233	0.004	0.03	3.24635782104868e-165	CD4 TCM	CARD9
8.07481103268606e-169	0.682477	0.147	0.081	1.90129500575626e-164	CD4 TCM	STK24
8.20746532025312e-169	0.351184	0.285	0.189	1.9325297843068e-164	CD4 TCM	TMED4
1.57876233649985e-168	0.675943	0.139	0.075	3.71735379752254e-164	CD4 TCM	HOXB2
1.66539595041365e-168	0.189375	0.448	0.321	3.92134130484398e-164	CD4 TCM	MAT2B
1.72912135900821e-168	0.227961	0.349	0.241	4.07138915192073e-164	CD4 TCM	MRPS34
1.76132482004576e-168	0.449022	0.167	0.096	4.14721542127974e-164	CD4 TCM	MID1IP1
3.45267014524727e-168	1.85513	0.042	0.01	8.12965712399923e-164	CD4 TCM	GOLGA7B
5.97035227726908e-168	0.458504	0.229	0.146	1.40577914720578e-163	CD4 TCM	RNF145
6.45377335071446e-168	1.02323	0.101	0.047	1.51960547315923e-163	CD4 TCM	PLCL1
8.26164416219047e-168	-5.88445	0	0.022	1.94528673442937e-163	CD4 TCM	TNNI2
1.16239354805189e-167	0.815861	0.148	0.082	2.73697184824298e-163	CD4 TCM	SMAD3
2.19525956446548e-167	-5.31544	0	0.022	5.16895817049042e-163	CD4 TCM	CNR2
5.81118736301581e-167	-2.05106	0.012	0.046	1.3683021764957e-162	CD4 TCM	ADGRG5
5.8760639187282e-167	-5.20879	0.001	0.023	1.38357801030374e-162	CD4 TCM	COLEC12
6.25498559527233e-167	-1.89696	0.043	0.093	1.47279890826282e-162	CD4 TCM	CCDC50
6.84827144126638e-167	0.480212	0.255	0.167	1.61249399356058e-162	CD4 TCM	NLRP1
7.25669144441511e-167	0.248839	0.372	0.26	1.70866056750198e-162	CD4 TCM	ELOVL5
1.17132522828538e-166	-6.11941	0.001	0.022	2.75800238252076e-162	CD4 TCM	SSPN
1.2971071424877e-166	0.641655	0.145	0.079	3.05416847770155e-162	CD4 TCM	MEI1
2.06465288420331e-166	0.273364	0.302	0.203	4.86143168114511e-162	CD4 TCM	H1FX
2.07362074183283e-166	0.707501	0.124	0.064	4.88254739871957e-162	CD4 TCM	IKBKE
2.82691992406671e-166	-3.89839	0.002	0.026	6.65626565320749e-162	CD4 TCM	TMCC3
2.87893332816431e-166	-3.47393	0.003	0.028	6.77873641449568e-162	CD4 TCM	AC243829.1
2.98494047424848e-166	0.25013	0.463	0.341	7.02834084066547e-162	CD4 TCM	NCOR1
3.68756039385534e-166	-2.1391	0.015	0.051	8.68272970337179e-162	CD4 TCM	KIAA0930
4.95906455493539e-166	1.08932	0.113	0.057	1.16766134010509e-161	CD4 TCM	NR3C2
5.61656844704743e-166	0.262818	0.374	0.264	1.32247720654179e-161	CD4 TCM	CD46
7.92198014458488e-166	0.255966	0.459	0.337	1.86530944484396e-161	CD4 TCM	SRSF11
1.10333735170951e-165	0.624595	0.195	0.119	2.59791812833521e-161	CD4 TCM	SENP7
1.69606516333906e-165	-6.03368	0.001	0.023	3.99355503359815e-161	CD4 TCM	CD1E
1.71191441146081e-165	0.279881	0.329	0.224	4.03087367322562e-161	CD4 TCM	HMGN4
1.71708801241229e-165	0.585847	0.156	0.088	4.04305543402599e-161	CD4 TCM	TAZ
2.70410019163753e-165	-6.14409	0	0.022	6.36707431122973e-161	CD4 TCM	DSC2
3.56434801925212e-165	0.648879	0.186	0.112	8.39261384613104e-161	CD4 TCM	RPS6KA5
3.67933860507041e-165	-1.87495	0.014	0.05	8.66337067949878e-161	CD4 TCM	SPECC1
4.87743213656031e-165	0.341893	0.29	0.195	1.14844017087449e-160	CD4 TCM	MESD
2.00292487262837e-164	0.347384	0.297	0.201	4.71608690509076e-160	CD4 TCM	MIER1
2.17307172058889e-164	0.593695	0.146	0.08	5.11671467329861e-160	CD4 TCM	FAS
3.61727368375405e-164	-2.41606	0.015	0.051	8.5172326157673e-160	CD4 TCM	CAMK1
4.16039898661643e-164	0.615203	0.216	0.136	9.79607545388705e-160	CD4 TCM	ZEB1
5.40463013403593e-164	0.283983	0.273	0.179	1.2725742113601e-159	CD4 TCM	ANP32E
5.5007270417938e-164	0.338596	0.262	0.171	1.29520118926077e-159	CD4 TCM	ZNRD1
6.67300048345457e-164	0.534334	0.191	0.116	1.57122469383421e-159	CD4 TCM	CCDC66
7.14524375027464e-164	0.984591	0.066	0.024	1.68241909343967e-159	CD4 TCM	BAG3
1.0490037167152e-163	0.473614	0.206	0.128	2.4699841513776e-159	CD4 TCM	OXLD1
1.67778921649309e-163	-1.60195	0.11	0.173	3.95052248915462e-159	CD4 TCM	LAP3
2.20325000688967e-163	-2.28935	0.011	0.045	5.18777246622243e-159	CD4 TCM	TSPAN4
3.60002886652997e-163	-5.5034	0.001	0.022	8.47662796913146e-159	CD4 TCM	SPIB
4.71338741597227e-163	0.112023	0.86	0.659	1.10981420096483e-158	CD4 TCM	MT-ND4
7.15909727975245e-163	0.421682	0.271	0.181	1.68568104549051e-158	CD4 TCM	PHC3
7.23969858163703e-163	0.309706	0.241	0.154	1.70465942803225e-158	CD4 TCM	TUBB4B
7.52103444104777e-163	0.444663	0.206	0.128	1.77090276948911e-158	CD4 TCM	MALT1
8.14073317894248e-163	0.298069	0.325	0.222	1.9168170343138e-158	CD4 TCM	TAP1
9.88004332310446e-163	-4.10199	0.001	0.024	2.32635500085818e-158	CD4 TCM	CLIC2
2.03095607564653e-162	-6.67828	0	0.021	4.78208917571731e-158	CD4 TCM	CD1D
2.59272681701055e-162	0.67943	0.128	0.067	6.10483456333305e-158	CD4 TCM	SNAI3
3.55721326326597e-162	-4.77057	0.001	0.023	8.37581434968605e-158	CD4 TCM	SLC37A2
4.69295343993353e-162	-5.226	0.001	0.024	1.10500281696675e-157	CD4 TCM	CCL3
5.99314970215178e-162	0.207262	0.432	0.311	1.41114702886866e-157	CD4 TCM	ARF6
8.01400335167735e-162	-4.00368	0.002	0.026	1.88697722918595e-157	CD4 TCM	ADGRG1
9.72182532263965e-162	0.119639	0.758	0.628	2.28910099046873e-157	CD4 TCM	RPS20
1.20558478382717e-161	0.408547	0.241	0.156	2.83866993199945e-157	CD4 TCM	NCOA7
1.25156371118093e-161	0.504785	0.262	0.174	2.94693191434662e-157	CD4 TCM	KAT6A
1.35277783069804e-161	1.21966	0.063	0.022	3.1852506801616e-157	CD4 TCM	BTLA
1.36543613634775e-161	0.896198	0.126	0.066	3.21505592664441e-157	CD4 TCM	CCDC7
1.67721243917854e-161	2.47065	0.031	0.005	3.9491644092898e-157	CD4 TCM	ISM1
4.09072472858998e-161	0.371195	0.224	0.142	9.63202044593797e-157	CD4 TCM	MAP7D1
4.9238707359413e-161	-1.77248	0.022	0.061	1.15937460348474e-156	CD4 TCM	TRGC2
5.78817224244302e-161	0.439699	0.176	0.103	1.36288303620563e-156	CD4 TCM	CCDC167
5.80481337473812e-161	0.202757	0.396	0.282	1.36680135721584e-156	CD4 TCM	POLR1D
1.14809223437554e-160	0.712834	0.123	0.064	2.70329797506066e-156	CD4 TCM	LSR
1.19255972386172e-160	-3.17345	0.004	0.031	2.80800112580481e-156	CD4 TCM	SLC2A9
1.61668979018283e-160	0.18324	0.41	0.293	3.80665777996449e-156	CD4 TCM	NDUFV2
1.69114204361551e-160	1.2914	0.063	0.022	3.98196305589708e-156	CD4 TCM	LINC00402
3.53553238458037e-160	-2.50192	0.012	0.045	8.32476455273293e-156	CD4 TCM	CORO1C
3.63980101443237e-160	-5.6721	0	0.021	8.57027546858246e-156	CD4 TCM	LILRA1
9.85188534557314e-160	-2.42726	0.009	0.039	2.31972492346865e-155	CD4 TCM	DUSP6
1.74105012104383e-159	1.31519	0.067	0.026	4.09947661500981e-155	CD4 TCM	BTBD11
2.58602281659902e-159	0.135161	0.697	0.535	6.08904932396405e-155	CD4 TCM	JAK1
2.86945889839342e-159	0.64406	0.148	0.083	6.75642792215714e-155	CD4 TCM	GOLGA8B
3.31799463712606e-159	0.666318	0.152	0.087	7.81255017257702e-155	CD4 TCM	CRTC3
3.66231822329302e-159	0.238399	0.313	0.213	8.62329448856574e-155	CD4 TCM	VPS51
4.64877374600608e-159	0.710703	0.138	0.076	1.09460026623459e-154	CD4 TCM	TRAK2
4.80332947453001e-159	0.16315	0.529	0.394	1.13099195807284e-154	CD4 TCM	SEC62
7.60482033829956e-159	0.143183	0.604	0.458	1.79063099685601e-154	CD4 TCM	UBE2D2
1.43115895222223e-158	0.55315	0.166	0.096	3.36980686890246e-154	CD4 TCM	GALM
1.92938542118609e-158	0.493043	0.217	0.137	4.54293091272477e-154	CD4 TCM	ZNF131
4.09187600685675e-158	0.739607	0.152	0.086	9.63473124574491e-154	CD4 TCM	NCK2
4.70745144683745e-158	-6.16562	0.001	0.022	1.10841651767235e-153	CD4 TCM	CH25H
7.6695439051961e-158	-1.7893	0.03	0.074	1.80587080791747e-153	CD4 TCM	SCPEP1
8.56876454944826e-158	-1.46634	0.088	0.146	2.01760130081309e-153	CD4 TCM	APLP2
8.70817342382847e-158	-5.58325	0.001	0.022	2.05042651437465e-153	CD4 TCM	ARHGEF40
1.0505715203521e-157	-5.67285	0	0.021	2.47367570182105e-153	CD4 TCM	BCL11A
1.06876261482997e-157	-3.76589	0.003	0.027	2.51650845287864e-153	CD4 TCM	LINC01410
1.17026932568982e-157	0.517919	0.137	0.075	2.75551615426924e-153	CD4 TCM	CD59
2.08285694935011e-157	0.507065	0.182	0.11	4.90429497293976e-153	CD4 TCM	SNHG12
3.67036002669939e-157	0.216867	0.302	0.204	8.64222971886638e-153	CD4 TCM	MRPL34
6.32662720864423e-157	1.13397	0.071	0.028	1.48966764254737e-152	CD4 TCM	PLEKHG3
6.56470447367277e-157	0.401133	0.297	0.204	1.54572531537099e-152	CD4 TCM	CCNL1
9.45504918869499e-157	-3.77562	0.003	0.026	2.22628588197012e-152	CD4 TCM	STAC3
1.15647264128403e-156	0.29875	0.3	0.203	2.72303048116737e-152	CD4 TCM	CDC42EP3
3.19808162146323e-156	0.263015	0.384	0.273	7.53020298589732e-152	CD4 TCM	GNG2
6.67110470905173e-156	0.910091	0.084	0.037	1.57077831479332e-151	CD4 TCM	CTLA4
6.9459991765882e-156	0.525733	0.151	0.085	1.63550496611946e-151	CD4 TCM	FBXL3
6.98482555759931e-156	0.817675	0.089	0.04	1.64464702579233e-151	CD4 TCM	PLEKHB1
8.14748528449974e-156	0.234311	0.323	0.222	1.91840688508831e-151	CD4 TCM	G3BP1
8.80221071832297e-156	-5.90898	0	0.021	2.07256853573633e-151	CD4 TCM	GPBAR1
1.72673759768648e-155	0.241912	0.524	0.395	4.06577634751258e-151	CD4 TCM	DDX17
2.5504894402742e-155	1.383	0.061	0.022	6.00538243606964e-151	CD4 TCM	TRAV8-6
3.22368536131014e-155	1.72315	0.073	0.03	7.59048955174085e-151	CD4 TCM	FAM13A
3.72615288082589e-155	0.493689	0.282	0.192	8.77359957319264e-151	CD4 TCM	RUNX1
4.99859005925113e-155	0.331373	0.434	0.318	1.17696801535127e-150	CD4 TCM	RABGAP1L
8.33048514022136e-155	-6.25324	0.001	0.021	1.96149603111652e-150	CD4 TCM	LINC01736
9.41838616141686e-155	0.366738	0.242	0.158	2.21765320556721e-150	CD4 TCM	CORO7
1.27238130072813e-154	2.08071	0.033	0.006	2.99594901069447e-150	CD4 TCM	LIMS2
1.48468228763639e-154	0.686182	0.138	0.076	3.49583291446864e-150	CD4 TCM	ARNTL
2.22786390594226e-154	0.295568	0.379	0.274	5.24572835293165e-150	CD4 TCM	NR3C1
3.76682906942554e-154	0.188307	0.492	0.368	8.86937572686938e-150	CD4 TCM	KHDRBS1
4.42667114622757e-154	0.16123	0.524	0.387	1.04230398809074e-149	CD4 TCM	HLA-F
6.44040242206223e-154	-6.92814	0	0.02	1.51645715429877e-149	CD4 TCM	ZNF503
8.39504321179828e-154	0.388181	0.228	0.146	1.97669687465002e-149	CD4 TCM	WDR82
1.09159135698805e-153	-2.94871	0.006	0.033	2.57026100916405e-149	CD4 TCM	ENC1
1.11126965722589e-153	0.833233	0.096	0.045	2.61659553490407e-149	CD4 TCM	LPAR2
1.92486145495114e-153	0.595695	0.145	0.082	4.53227878182796e-149	CD4 TCM	ING5
3.96827456914079e-153	3.24403	0.023	0.002	9.34369930049891e-149	CD4 TCM	TMEM45B
6.20899585718193e-153	0.619256	0.158	0.091	1.46197016453206e-148	CD4 TCM	TSPAN5
7.24207285893139e-153	1.14344	0.055	0.019	1.70521847536399e-148	CD4 TCM	IL2RA
2.86521879934639e-152	0.341626	0.25	0.164	6.74644418494102e-148	CD4 TCM	SRSF8
3.48836025549878e-152	-2.34811	0.01	0.041	8.21369305759742e-148	CD4 TCM	TRGC1
3.78431454740769e-152	0.466013	0.182	0.11	8.91054703332615e-148	CD4 TCM	MHENCR
4.13680483208681e-152	0.381089	0.242	0.158	9.7405206576316e-148	CD4 TCM	IRF3
4.38814502523761e-152	1.51667	0.045	0.013	1.03323262764245e-147	CD4 TCM	NCMAP-DT
6.5515770899706e-152	0.194811	0.333	0.231	1.54263434160448e-147	CD4 TCM	NFKBIA
8.45592479911006e-152	0.823564	0.138	0.077	1.99103205319845e-147	CD4 TCM	ITPKB
8.62134429503998e-152	0.346243	0.224	0.143	2.02998172771011e-147	CD4 TCM	ABT1
9.98558050047738e-152	0.222992	0.411	0.299	2.3512047846424e-147	CD4 TCM	DPP7
1.17777987103078e-151	0.3678	0.325	0.227	2.77320048432906e-147	CD4 TCM	ST6GAL1
1.30571084102889e-151	0.349912	0.346	0.246	3.07442674628663e-147	CD4 TCM	FLI1
2.28848740215152e-151	-1.49277	0.055	0.106	5.38847243710597e-147	CD4 TCM	CTNNA1
3.33521431657024e-151	0.724252	0.137	0.077	7.85309562979629e-147	CD4 TCM	MAP3K4
4.5878528118896e-151	-1.95281	0.045	0.092	1.08025582308753e-146	CD4 TCM	LTC4S
4.99005806453027e-151	0.21913	0.447	0.33	1.1749590718743e-146	CD4 TCM	UBXN4
5.09601871466541e-151	0.407734	0.206	0.13	1.19990856655512e-146	CD4 TCM	ERG28
5.37584318474854e-151	0.148328	0.381	0.27	1.26579603628089e-146	CD4 TCM	PSMC5
5.7201031119564e-151	0.223316	0.256	0.168	1.34685547874125e-146	CD4 TCM	GDI1
6.07285959819723e-151	-5.58196	0.001	0.021	1.42991552099152e-146	CD4 TCM	KHDRBS3
7.24092624439068e-151	0.765902	0.104	0.052	1.70494849350423e-146	CD4 TCM	TIAM1
9.07379954943552e-151	0.277021	0.319	0.221	2.13651684191009e-146	CD4 TCM	WTAP
9.79564725408378e-151	0.277964	0.283	0.191	2.30648310244657e-146	CD4 TCM	UBA2
1.95189316866966e-150	2.17706	0.034	0.007	4.59592765494958e-146	CD4 TCM	PTPN13
2.50069619262315e-150	-3.49832	0.003	0.026	5.88813925515046e-146	CD4 TCM	MYO1E
2.80373714691164e-150	-4.52132	0.001	0.021	6.60167948611815e-146	CD4 TCM	JUP
3.07656939583362e-150	0.39662	0.225	0.145	7.24409029942985e-146	CD4 TCM	SCAMP3
3.39607823357063e-150	0.105688	0.585	0.443	7.99640580876539e-146	CD4 TCM	NDUFS5
3.92504991468902e-150	0.358266	0.249	0.165	9.24192252912677e-146	CD4 TCM	SECISBP2
8.23293900773805e-150	0.337084	0.215	0.136	1.938527818762e-145	CD4 TCM	LIX1L
8.5797988500612e-150	-5.9664	0	0.02	2.02019943723541e-145	CD4 TCM	SMIM25
8.64107956953247e-150	-7.45206	0	0.019	2.03462859544212e-145	CD4 TCM	ACPP
1.00097243318219e-149	-1.72619	0.033	0.077	2.35688969117079e-145	CD4 TCM	TSPAN3
1.09300491254517e-149	1.04035	0.125	0.069	2.57358936707887e-145	CD4 TCM	FHIT
1.45157437204281e-149	0.714163	0.105	0.053	3.41787701641201e-145	CD4 TCM	LINC00324
1.50800288113956e-149	0.28766	0.285	0.194	3.55074358393121e-145	CD4 TCM	TEX264
1.63382180169135e-149	0.154528	0.41	0.298	3.84699681426245e-145	CD4 TCM	EIF2S2
1.85724377008711e-149	0.27067	0.243	0.158	4.37306618104711e-145	CD4 TCM	DANCR
2.49835665722269e-149	0.368585	0.267	0.18	5.88263058509655e-145	CD4 TCM	RBBP6
3.34466617243115e-149	0.42588	0.203	0.128	7.87535096960638e-145	CD4 TCM	AP1G2
3.76048608861029e-149	0.385973	0.251	0.168	8.85444054424179e-145	CD4 TCM	LPIN2
3.85832950147123e-149	0.302249	0.314	0.217	9.08482264416416e-145	CD4 TCM	RSBN1L
4.05532194200952e-149	0.244747	0.368	0.262	9.54866104465562e-145	CD4 TCM	NAP1L4
5.52681577729816e-149	-4.04303	0.002	0.024	1.30134404292262e-144	CD4 TCM	CD93
7.46484925481449e-149	-2.7014	0.02	0.057	1.75767340553862e-144	CD4 TCM	CD83
7.46973388954585e-149	0.327605	0.293	0.2	1.75882354163247e-144	CD4 TCM	AC004687.1
9.14674527077551e-149	0.808699	0.1	0.049	2.1536926414568e-144	CD4 TCM	AC016074.2
1.2453228087997e-148	-2.48557	0.014	0.046	2.93223708559978e-144	CD4 TCM	RAPH1
2.67903792776765e-148	0.66398	0.145	0.083	6.30806270472171e-144	CD4 TCM	CDR2
4.1060780661416e-148	0.159393	0.464	0.342	9.66817141453702e-144	CD4 TCM	CCDC85B
1.77798572350932e-147	1.42473	0.05	0.016	4.18644518457504e-143	CD4 TCM	KIAA1324
2.42145498524166e-147	-4.9438	0.001	0.021	5.70155790825001e-143	CD4 TCM	AC020656.1
6.77708170526069e-147	-2.07694	0.016	0.05	1.59573165832068e-142	CD4 TCM	TRGV7
1.15304782350735e-146	-6.49495	0	0.019	2.71496640523041e-142	CD4 TCM	CD300E
1.17428281488316e-146	0.424907	0.281	0.193	2.76496631592388e-142	CD4 TCM	NFATC3
1.68437590368921e-146	0.86467	0.081	0.036	3.96603150282661e-142	CD4 TCM	CLN5
1.89800065513882e-146	0.230637	0.298	0.204	4.46903234258986e-142	CD4 TCM	DNAJA2
1.9590282378978e-146	1.56509	0.043	0.012	4.61272788895416e-142	CD4 TCM	FBXL16
2.45890626955147e-146	0.308033	0.327	0.226	5.7897407022859e-142	CD4 TCM	STAT4
2.52052112857013e-146	0.101613	0.926	0.921	5.93481904933122e-142	CD4 TCM	RPS5
2.70051921255288e-146	-4.88509	0	0.02	6.358642537877e-142	CD4 TCM	DTNA
7.1665421884144e-146	0.108375	0.492	0.369	1.68743402368405e-141	CD4 TCM	SNHG8
7.311129074189e-146	-4.30455	0.002	0.024	1.72147845180854e-141	CD4 TCM	SPTSSB
8.02430180328578e-146	0.418722	0.296	0.206	1.88940210260167e-141	CD4 TCM	UBAC2
8.48260737691873e-146	0.676758	0.211	0.136	1.99731473296928e-141	CD4 TCM	AKT3
1.09011264632981e-145	0.158193	0.414	0.3	2.56677923704816e-141	CD4 TCM	TRAM1
1.48881259488892e-145	0.577297	0.15	0.086	3.50555813592546e-141	CD4 TCM	ZBTB25
2.42913201342737e-145	-6.02511	0.001	0.02	5.71963423881607e-141	CD4 TCM	SLCO2B1
2.45562853234041e-145	0.458543	0.189	0.117	5.78202294224873e-141	CD4 TCM	SINHCAF
2.68875372858998e-145	0.521327	0.187	0.116	6.33093952933797e-141	CD4 TCM	SLC16A7
2.81560294101479e-145	0.399802	0.301	0.21	6.62961868491342e-141	CD4 TCM	RASA2
3.21112828367812e-145	-3.58251	0.003	0.026	7.56092265674849e-141	CD4 TCM	TRGV8
3.52968058338631e-145	-4.32938	0.001	0.022	8.31098590164142e-141	CD4 TCM	TBC1D12
4.1744070097784e-145	-1.36706	0.075	0.13	9.82905874522422e-141	CD4 TCM	STX7
4.63471241187434e-145	0.803744	0.123	0.067	1.09128938449993e-140	CD4 TCM	RAP1GAP2
9.7973159695615e-145	0.537808	0.156	0.092	2.30687601819295e-140	CD4 TCM	PRKD2
1.34944062445834e-144	0.395231	0.203	0.129	3.1773928943496e-140	CD4 TCM	LMF2
1.68663207303663e-144	0.379387	0.201	0.126	3.97134387917205e-140	CD4 TCM	ABHD14A
2.50737436785517e-144	0.358594	0.277	0.189	5.90386368655179e-140	CD4 TCM	ATP2B4
2.77759307177801e-144	-4.48496	0.001	0.021	6.54012064680851e-140	CD4 TCM	SLAMF8
3.29286427798049e-144	0.618121	0.156	0.092	7.75337822893287e-140	CD4 TCM	PDE4D
5.9490905549916e-144	0.49935	0.174	0.106	1.40077286207832e-139	CD4 TCM	TMEM223
8.30400491103276e-144	-4.21296	0.001	0.021	1.95526099635177e-139	CD4 TCM	NECTIN2
8.52616039558121e-144	0.513741	0.213	0.137	2.00756972674355e-139	CD4 TCM	PHACTR2
8.68578999411874e-144	1.03287	0.091	0.044	2.0451561120152e-139	CD4 TCM	C18orf25
9.33613523870783e-144	0.502707	0.156	0.092	2.19828640330615e-139	CD4 TCM	KDSR
1.08318735328552e-143	0.226114	0.393	0.285	2.55047294204609e-139	CD4 TCM	SRSF10
1.23673518816344e-143	0.174342	0.367	0.261	2.91201667404963e-139	CD4 TCM	RBMX
1.4482606661464e-143	-2.82382	0.008	0.036	3.41007456450832e-139	CD4 TCM	DRAM1
1.49434465583111e-143	-1.81337	0.063	0.114	3.51858392661993e-139	CD4 TCM	IFNGR2
1.71150127748132e-143	0.607407	0.144	0.083	4.02990090795752e-139	CD4 TCM	VCL
1.73334145170392e-143	-4.07581	0.003	0.025	4.08132578218205e-139	CD4 TCM	S100B
2.0408988233026e-143	0.533315	0.121	0.065	4.80550036934829e-139	CD4 TCM	RRM1
2.52680564858435e-143	0.322233	0.254	0.17	5.9496165801567e-139	CD4 TCM	SSBP4
3.1534401892638e-143	0.254406	0.342	0.244	7.42509026964054e-139	CD4 TCM	PRPF38B
3.27255180254814e-143	-4.29947	0.001	0.021	7.70555047427985e-139	CD4 TCM	GAB1
3.60319012273903e-143	0.582788	0.117	0.063	8.48407146300131e-139	CD4 TCM	SIGMAR1
6.07839560535071e-143	0.379006	0.17	0.103	1.43121902923588e-138	CD4 TCM	GBP1
7.26835793522008e-143	-1.6996	0.057	0.107	1.71140755942692e-138	CD4 TCM	WARS
7.81177709199087e-143	0.877528	0.08	0.036	1.83936103408017e-138	CD4 TCM	CLUAP1
8.10037199515565e-143	-0.672051	0.656	0.62	1.90731358997935e-138	CD4 TCM	COTL1
1.1388423447936e-142	0.5007	0.196	0.124	2.68151818505101e-138	CD4 TCM	NUP210
1.27595507205391e-142	0.396297	0.213	0.137	3.00436381265813e-138	CD4 TCM	PRDM1
1.50118019274102e-142	-2.26242	0.017	0.051	3.534678881828e-138	CD4 TCM	DENND6B
1.61629956078981e-142	0.247145	0.417	0.308	3.80573894583569e-138	CD4 TCM	ATRX
2.00526724354916e-142	-1.00914	0.431	0.446	4.72160225166086e-138	CD4 TCM	ANXA5
2.57403441371113e-142	-1.49104	0.056	0.105	6.06082143052422e-138	CD4 TCM	TBXAS1
4.09169235960568e-142	0.642053	0.128	0.071	9.63429882992754e-138	CD4 TCM	CTC1
4.97417381356784e-142	0.3254	0.317	0.22	1.17121896614268e-137	CD4 TCM	PTPN4
4.99180540995843e-142	0.478234	0.15	0.088	1.17537050182881e-137	CD4 TCM	PDE4DIP
5.29941416750736e-142	-5.6646	0.001	0.019	1.24780005988128e-137	CD4 TCM	FLT3
5.51287220854563e-142	0.25759	0.361	0.26	1.29806089022415e-137	CD4 TCM	TTC3
6.5817312245167e-142	0.525026	0.163	0.097	1.5497344341247e-137	CD4 TCM	ZNF276
8.92563994372468e-142	-0.924008	0.06	0.112	2.10163118114941e-137	CD4 TCM	CXCR6
9.02205888223541e-142	0.500504	0.256	0.174	2.12433398441115e-137	CD4 TCM	ADK
1.19363571643712e-141	-5.16715	0.001	0.02	2.81053465792285e-137	CD4 TCM	BATF3
1.28096515511589e-141	0.398547	0.299	0.209	3.01616055423588e-137	CD4 TCM	PIK3R5
1.51322876964753e-141	0.277543	0.299	0.206	3.56304846101206e-137	CD4 TCM	GBP2
1.79700031060151e-141	0.470369	0.173	0.105	4.23121693134232e-137	CD4 TCM	MOB2
2.31867986132829e-141	0.365271	0.237	0.156	5.45956360148359e-137	CD4 TCM	SP140
2.97971958413367e-141	0.439643	0.185	0.114	7.01604773280113e-137	CD4 TCM	XPC
4.38107535074259e-141	-2.16299	0.022	0.058	1.03156800208585e-136	CD4 TCM	GPAT3
5.38584847250776e-141	1.17206	0.055	0.02	1.26815188133668e-136	CD4 TCM	WDR86-AS1
6.14568789886637e-141	-5.57492	0	0.019	1.44706367266707e-136	CD4 TCM	KCNE3
7.73220037568397e-141	0.542763	0.142	0.081	1.82062390045855e-136	CD4 TCM	HDAC7
1.04005004931694e-140	0.433975	0.22	0.145	2.44890184612167e-136	CD4 TCM	PLEC
1.31098621337104e-140	-2.81249	0.011	0.041	3.08684813800344e-136	CD4 TCM	NPL
1.58865099607879e-140	-1.54474	0.094	0.149	3.74063763536712e-136	CD4 TCM	GLUL
1.59570735378055e-140	0.565667	0.169	0.103	3.75725253521168e-136	CD4 TCM	GABPB1-AS1
2.48409987363279e-140	-4.6447	0.001	0.021	5.84906156245578e-136	CD4 TCM	TSPAN33
2.74231503193009e-140	0.105182	0.587	0.453	6.4570549741826e-136	CD4 TCM	SMDT1
2.80327831700581e-140	0.381259	0.181	0.112	6.60059912522187e-136	CD4 TCM	PIGC
4.49360650492784e-140	0.394058	0.236	0.157	1.05806458765031e-135	CD4 TCM	CRYBG1
1.77455091443901e-139	0.119198	0.411	0.298	4.1783575831381e-135	CD4 TCM	SSB
2.24379960562242e-139	1.11196	0.068	0.029	5.28325055139856e-135	CD4 TCM	ACVR1
2.91643461173063e-139	0.280155	0.242	0.161	6.86703693678094e-135	CD4 TCM	RPP21
3.29101655836585e-139	-5.1881	0	0.019	7.74902758832822e-135	CD4 TCM	PLA2G4A
3.48173192393942e-139	0.372538	0.213	0.138	8.19808598810776e-135	CD4 TCM	ERGIC2
3.7721279291875e-139	0.206854	0.352	0.249	8.88185242206488e-135	CD4 TCM	TSC22D4
5.14240448619399e-139	-4.42455	0.001	0.02	1.21083056031924e-134	CD4 TCM	KRT86
5.7993684069067e-139	-0.315832	0.856	0.818	1.36551928509025e-134	CD4 TCM	MYL6
6.08801695355292e-139	0.673341	0.105	0.054	1.43348447188357e-134	CD4 TCM	AGFG2
9.32447466149156e-139	1.17376	0.055	0.02	2.1955408037948e-134	CD4 TCM	IL23A
9.73464614719532e-139	0.152636	0.4	0.289	2.29211978181861e-134	CD4 TCM	NDUFA12
1.28504761556359e-138	-5.40251	0	0.019	3.02577311560602e-134	CD4 TCM	CCDC170
1.90448389105612e-138	-2.02867	0.018	0.052	4.48429776988075e-134	CD4 TCM	TP53I11
2.52951386772208e-138	2.37788	0.028	0.005	5.95599335293841e-134	CD4 TCM	FAM153A
3.08874368981855e-138	0.178267	0.305	0.21	7.27275589204677e-134	CD4 TCM	UBE2N
3.91710250869775e-138	-6.12922	0.001	0.019	9.22320956697972e-134	CD4 TCM	CYTL1
4.34403656835744e-138	-2.251	0.021	0.057	1.02284685038544e-133	CD4 TCM	IGLV2-14
5.18670739748526e-138	1.16915	0.058	0.022	1.22126212381188e-133	CD4 TCM	CHST7
6.23504055676465e-138	0.253513	0.259	0.174	1.4681026494958e-133	CD4 TCM	HPCAL1
1.00244600005174e-137	0.378065	0.321	0.228	2.36035935172182e-133	CD4 TCM	SRPK2
1.64180385051503e-137	0.651043	0.133	0.076	3.8657913464227e-133	CD4 TCM	ERO1A
2.05637574677401e-137	0.233796	0.281	0.193	4.84194233335408e-133	CD4 TCM	FBXW5
2.31051978463145e-137	0.174436	0.408	0.299	5.44034988489321e-133	CD4 TCM	RAD21
2.42909234638435e-137	-4.37085	0.001	0.021	5.71954083879658e-133	CD4 TCM	ADGRE2
3.26254474576476e-137	0.786143	0.103	0.053	7.6819878583777e-133	CD4 TCM	CSAD
7.1928875852e-137	0.401421	0.258	0.177	1.69363731081119e-132	CD4 TCM	CNTRL
7.38694567652708e-137	0.417147	0.196	0.124	1.73933022899507e-132	CD4 TCM	PPWD1
9.52426888855654e-137	0.287779	0.244	0.163	2.24258435249952e-132	CD4 TCM	SRSF1
1.03406538045233e-136	3.0616	0.02	0.002	2.43481034481305e-132	CD4 TCM	AL109930.1
1.21751958249522e-136	0.389855	0.184	0.115	2.86677160894324e-132	CD4 TCM	NUP50
1.26442281591266e-136	1.10795	0.056	0.021	2.97720996234795e-132	CD4 TCM	NR1D1
1.35285626287771e-136	0.169385	0.338	0.239	3.18543535657186e-132	CD4 TCM	IK
1.85826960006642e-136	0.328088	0.33	0.238	4.3754816003164e-132	CD4 TCM	BPTF
1.95822543148017e-136	1.50072	0.039	0.011	4.61083760096322e-132	CD4 TCM	AC008892.1
2.84954009969154e-136	0.26132	0.38	0.278	6.70952711873371e-132	CD4 TCM	STK10
3.74994036549051e-136	0.468626	0.164	0.099	8.82960958458396e-132	CD4 TCM	SLC2A4RG
4.79873951533692e-136	-3.23459	0.004	0.026	1.12991120628123e-131	CD4 TCM	PALLD
4.81556763109626e-136	0.127499	0.368	0.264	1.13387355441793e-131	CD4 TCM	DUT
5.300701435916e-136	0.393305	0.207	0.134	1.24810316010078e-131	CD4 TCM	RNF34
5.59967240629659e-136	-0.600948	0.6	0.578	1.3184988647866e-131	CD4 TCM	ITGB2
5.69062786049147e-136	0.163527	0.396	0.289	1.33991523603132e-131	CD4 TCM	DDX18
7.1603611037465e-136	0.885452	0.085	0.04	1.68597862548815e-131	CD4 TCM	RORA-AS1
7.23522284718628e-136	0.470355	0.153	0.091	1.70360557159848e-131	CD4 TCM	UBALD2
8.21198695620143e-136	0.524531	0.174	0.108	1.93359444870719e-131	CD4 TCM	STX16
8.34949872377328e-136	0.459045	0.156	0.093	1.96597296949966e-131	CD4 TCM	MTA2
1.29592039824327e-135	0.294848	0.249	0.168	3.0513741697036e-131	CD4 TCM	OIP5-AS1
1.46365769349342e-135	0.15775	0.296	0.203	3.44632840509961e-131	CD4 TCM	SNRPN
2.41087395818445e-135	-1.17176	0.108	0.166	5.67664382194112e-131	CD4 TCM	EFHD2
3.57554638229447e-135	0.427144	0.262	0.181	8.41898151175056e-131	CD4 TCM	FRYL
4.68006462247679e-135	0.253501	0.207	0.133	1.10196801600839e-130	CD4 TCM	CFAP97
1.09815569498722e-134	0.37528	0.216	0.14	2.58571739941691e-130	CD4 TCM	SNRPA1
1.43194273483105e-134	0.873154	0.09	0.044	3.37165236343319e-130	CD4 TCM	CYB561
1.67491747710011e-134	-5.70761	0	0.018	3.94376069157993e-130	CD4 TCM	ADGRG6
1.98838708699515e-134	-3.72882	0.002	0.021	4.68185623503877e-130	CD4 TCM	LGR6
3.56881858075996e-134	0.38429	0.187	0.117	8.40314023025741e-130	CD4 TCM	THAP7
4.66042445701425e-134	0.363979	0.273	0.189	1.09734354264858e-129	CD4 TCM	SMG1
6.81711571087399e-134	-2.55939	0.01	0.037	1.60515806528239e-129	CD4 TCM	TRGV2
8.33491733338805e-134	0.326224	0.21	0.136	1.96253963531955e-129	CD4 TCM	TMUB1
9.17760403965369e-134	0.11947	0.336	0.237	2.16095864717686e-129	CD4 TCM	IGBP1
9.23878179416681e-134	0.465849	0.168	0.104	2.17536356125452e-129	CD4 TCM	NDE1
9.2984041482649e-134	0.812154	0.091	0.045	2.18940224075045e-129	CD4 TCM	ACYP1
9.51004046366077e-134	-1.60512	0.069	0.119	2.23923412757357e-129	CD4 TCM	BLVRB
1.31990655222479e-133	0.24312	0.281	0.194	3.1078519678685e-129	CD4 TCM	PDCD10
1.91121894798051e-133	-7.00873	0	0.017	4.50015613491491e-129	CD4 TCM	CD36
1.94804400776443e-133	0.569929	0.085	0.041	4.58686442068214e-129	CD4 TCM	LGALS3BP
2.21383752315789e-133	1.6007	0.049	0.017	5.21270183202757e-129	CD4 TCM	TRAV26-1
2.30505495367927e-133	0.500876	0.197	0.127	5.42748239393322e-129	CD4 TCM	RPRD2
3.26660314062885e-133	-1.13011	0.173	0.232	7.69154375492469e-129	CD4 TCM	RB1
3.57119782892053e-133	-3.50892	0.003	0.025	8.40874240797627e-129	CD4 TCM	SOCS6
3.61615537288831e-133	0.495316	0.169	0.104	8.51459944100282e-129	CD4 TCM	TARSL2
4.0559963181232e-133	0.457399	0.192	0.123	9.55024893065288e-129	CD4 TCM	ASXL1
4.65114316636671e-133	0.464795	0.167	0.102	1.0951581699527e-128	CD4 TCM	TBC1D10A
6.16205451662197e-133	-6.11053	0.001	0.019	1.45091735648381e-128	CD4 TCM	IL1B
7.8576012380192e-133	0.644274	0.108	0.057	1.850150787504e-128	CD4 TCM	GPX7
1.10315106207927e-132	0.326074	0.235	0.156	2.59747949077184e-128	CD4 TCM	BLOC1S4
1.55757089561286e-132	0.290203	0.37	0.271	3.66745643081004e-128	CD4 TCM	LUC7L3
1.7308914027736e-132	0.27648	0.284	0.197	4.07555689697071e-128	CD4 TCM	CNPY2
1.97773718628491e-132	0.393006	0.185	0.117	4.65677997882646e-128	CD4 TCM	HK1
3.31362020573642e-132	-4.16455	0.002	0.021	7.80225013642697e-128	CD4 TCM	MRC1
3.35176163958368e-132	-1.37486	0.066	0.116	7.89205795656373e-128	CD4 TCM	MPST
3.74569098726428e-132	0.558778	0.135	0.078	8.81960399861247e-128	CD4 TCM	ZC3H8
3.81314084117814e-132	0.252543	0.304	0.213	8.97842142463804e-128	CD4 TCM	TMCO1
4.16470076703649e-132	0.610965	0.128	0.073	9.80620442606413e-128	CD4 TCM	C19orf12
7.8106406284146e-132	-1.2508	0.212	0.264	1.8390934423665e-127	CD4 TCM	CRTAP
8.16434656759729e-132	0.641847	0.134	0.078	1.92237704280646e-127	CD4 TCM	IL4R
9.27994622378696e-132	-4.24496	0.001	0.02	2.18505613785288e-127	CD4 TCM	RASGRP4
1.3649278126234e-131	0.121562	0.766	0.615	3.21385902760305e-127	CD4 TCM	YWHAZ
1.75750320299314e-131	0.200131	0.342	0.244	4.13821704176765e-127	CD4 TCM	SF3A2
2.43958983123272e-131	0.381898	0.218	0.144	5.74425821662055e-127	CD4 TCM	SBNO1
2.63655452862448e-131	-3.67687	0.002	0.022	6.20803129309919e-127	CD4 TCM	SETBP1
3.63198491999157e-131	-6.70328	0	0.017	8.55187169261216e-127	CD4 TCM	TMEM51
4.18966589329906e-131	-1.75876	0.018	0.051	9.86498731236197e-127	CD4 TCM	VNN2
5.19593305469686e-131	0.17933	0.309	0.217	1.22343439705892e-126	CD4 TCM	SF3A1
7.3136582329435e-131	0.190946	0.388	0.283	1.72207396752888e-126	CD4 TCM	RNF149
8.08019603496113e-131	0.530575	0.169	0.105	1.90256295839195e-126	CD4 TCM	SSBP2
9.53410773430176e-131	0.186894	0.462	0.348	2.24490100711869e-126	CD4 TCM	KTN1
9.80463337413498e-131	-1.36005	0.218	0.266	2.30859897427382e-126	CD4 TCM	AP1S2
1.35809366693008e-130	-2.6082	0.007	0.032	3.19776734815357e-126	CD4 TCM	LILRB3
1.38541025785572e-130	-6.03125	0	0.017	3.26208699314708e-126	CD4 TCM	MACORIS
1.39513229594e-130	0.239987	0.316	0.225	3.28497850402032e-126	CD4 TCM	EIF5B
1.64471833497484e-130	0.486454	0.202	0.131	3.87265379153177e-126	CD4 TCM	SUPT3H
1.75059036157645e-130	0.527299	0.193	0.125	4.12194006536792e-126	CD4 TCM	TNRC6A
2.08637676277138e-130	0.161332	0.402	0.294	4.91258272562148e-126	CD4 TCM	OTUB1
2.29859468850098e-130	0.470788	0.175	0.11	5.41227105354441e-126	CD4 TCM	CBFB
3.73244458647942e-130	0.222634	0.258	0.175	8.78841402332444e-126	CD4 TCM	SBDS
3.84996048906443e-130	0.236705	0.329	0.236	9.06511696755111e-126	CD4 TCM	SRSF4
3.91027572829631e-130	1.47028	0.042	0.013	9.20713522984648e-126	CD4 TCM	AL109741.1
3.92855038349593e-130	-2.09369	0.019	0.051	9.25016473297951e-126	CD4 TCM	SCCPDH
5.42727488430588e-130	0.66981	0.174	0.109	1.27790614425866e-125	CD4 TCM	BTBD9
9.42639610576424e-130	0.416589	0.228	0.153	2.21953922706325e-125	CD4 TCM	ERN1
1.11200112471229e-129	0.182942	0.536	0.412	2.61831784824755e-125	CD4 TCM	SP100
1.90491089623958e-129	1.09799	0.057	0.022	4.48530319628572e-125	CD4 TCM	LAIR2
2.13665286087671e-129	0.428967	0.195	0.126	5.0309628262203e-125	CD4 TCM	THUMPD3-AS1
2.37743803753455e-129	0.588196	0.131	0.075	5.59791560317886e-125	CD4 TCM	NMT2
2.56427876333454e-129	-4.39056	0.009	0.035	6.03785077614751e-125	CD4 TCM	CD79A
2.96104092081554e-129	0.347432	0.232	0.155	6.97206695215227e-125	CD4 TCM	URI1
4.77897535060088e-129	-5.21865	0.001	0.018	1.12525753605248e-124	CD4 TCM	CDHR1
7.14052694517427e-129	0.588781	0.122	0.069	1.68130847451073e-124	CD4 TCM	TMEM156
1.85652913531613e-128	1.48248	0.038	0.011	4.37138350201536e-124	CD4 TCM	GPR146
1.91240414277405e-128	0.516452	0.148	0.088	4.50294679457579e-124	CD4 TCM	TPD52
2.67077992734956e-128	0.305595	0.214	0.141	6.28861841693729e-124	CD4 TCM	GSDMD
2.72826611615268e-128	0.292501	0.264	0.181	6.4239753970931e-124	CD4 TCM	SHFL
2.80982212859086e-128	0.458053	0.147	0.087	6.61600718398003e-124	CD4 TCM	CDKN2AIP
2.95381432363188e-128	0.769816	0.093	0.047	6.95505120642363e-124	CD4 TCM	NFRKB
3.74885983591712e-128	0.110113	0.306	0.212	8.82706536965045e-124	CD4 TCM	DNAJB1
4.70207785955372e-128	0.401746	0.196	0.127	1.10715125281052e-123	CD4 TCM	CUL4A
5.21313951752926e-128	0.312391	0.3	0.214	1.22748583079744e-123	CD4 TCM	ZNF638
5.52235378033835e-128	0.187221	0.322	0.229	1.30029342111847e-123	CD4 TCM	BTG2
6.15620984906442e-128	0.331581	0.305	0.218	1.44954117106071e-123	CD4 TCM	GOLGA4
1.05430551009146e-127	0.144075	0.359	0.259	2.48246775406134e-123	CD4 TCM	PARP1
3.2072220136463e-127	0.322352	0.238	0.162	7.55172495333158e-123	CD4 TCM	STAT1
4.09819549773559e-127	1.06846	0.055	0.021	9.64961111896822e-123	CD4 TCM	GRPEL2
4.13964176892732e-127	0.519833	0.134	0.078	9.74720050911627e-123	CD4 TCM	FAM104A
5.45308214959107e-127	0.765173	0.095	0.049	1.28398272294271e-122	CD4 TCM	ABCD2
6.81033445212409e-127	0.359806	0.181	0.115	1.60356135009714e-122	CD4 TCM	DIMT1
8.01822725167428e-127	-5.11596	0.001	0.018	1.88797178867922e-122	CD4 TCM	NCKAP5
8.85537741670582e-127	0.771452	0.097	0.051	2.08508716653755e-122	CD4 TCM	TECPR1
9.18623155077783e-127	1.19234	0.052	0.019	2.16299008094615e-122	CD4 TCM	CLIC5
9.23220620265804e-127	0.242885	0.179	0.113	2.17381527247786e-122	CD4 TCM	MAPKAPK3
9.76335772934802e-127	0.336258	0.266	0.185	2.29888021095229e-122	CD4 TCM	ST3GAL1
9.85084286536431e-127	-1.18656	0.051	0.097	2.31947946107868e-122	CD4 TCM	ADRB2
1.20805528323392e-126	0.372719	0.185	0.117	2.84448696990258e-122	CD4 TCM	EHD1
1.31091809272577e-126	0.326999	0.307	0.22	3.08668774113209e-122	CD4 TCM	ANKHD1
1.35183653367672e-126	-3.04947	0.004	0.025	3.1830343021952e-122	CD4 TCM	DEPTOR
1.43993296311169e-126	-6.32496	0.001	0.017	3.39046615494278e-122	CD4 TCM	CCL2
1.76063322984857e-126	0.225612	0.234	0.156	4.14558700300145e-122	CD4 TCM	SF3A3
1.76616280077849e-126	-2.46933	0.009	0.035	4.15860693071303e-122	CD4 TCM	FCHO2
1.89225329605152e-126	-3.08531	0.003	0.023	4.4554996108829e-122	CD4 TCM	L3MBTL4
2.77416494299005e-126	0.377748	0.179	0.113	6.53204877476437e-122	CD4 TCM	NUDT16L1
3.18296393929595e-126	-3.29015	0.004	0.026	7.49460689146623e-122	CD4 TCM	DMXL2
3.74354438464498e-126	0.127247	0.529	0.403	8.81454960808507e-122	CD4 TCM	SF3B2
3.87758144116523e-126	0.403742	0.145	0.087	9.13015326136766e-122	CD4 TCM	MX2
4.06005952858809e-126	0.324077	0.183	0.116	9.55981616601352e-122	CD4 TCM	ZNF146
4.55915810177773e-126	0.612365	0.096	0.05	1.07349936664458e-121	CD4 TCM	PNMA1
4.90957699551257e-126	0.168133	0.351	0.253	1.15600899936339e-121	CD4 TCM	PPM1G
4.94583876710611e-126	0.677628	0.126	0.072	1.1645471961028e-121	CD4 TCM	SNHG14
4.99337636055509e-126	-1.84986	0.043	0.085	1.1757403978563e-121	CD4 TCM	CREG1
7.39906030439725e-126	-2.06497	0.017	0.049	1.74218273927338e-121	CD4 TCM	RAB34
8.22167474634589e-126	-6.67604	0	0.016	1.9358755357746e-121	CD4 TCM	CATSPER1
8.27537014332469e-126	0.172002	0.466	0.35	1.94851865394723e-121	CD4 TCM	SH3KBP1
8.41867253199912e-126	-6.63733	0	0.016	1.98226063438451e-121	CD4 TCM	SYT17
1.12844055606524e-125	0.680509	0.094	0.048	2.65702613331121e-121	CD4 TCM	FUT7
1.26923257426157e-125	0.236245	0.305	0.216	2.98853501935628e-121	CD4 TCM	EAPP
1.40257349117887e-125	0.339572	0.241	0.163	3.30249954232978e-121	CD4 TCM	PPP4R3B
2.1251071460289e-125	0.215992	0.325	0.233	5.00377728603964e-121	CD4 TCM	CGGBP1
2.54628815721575e-125	0.617705	0.11	0.06	5.9954900949802e-121	CD4 TCM	SH3GL1
2.63140075634826e-125	0.581661	0.12	0.067	6.1958962208976e-121	CD4 TCM	PFKP
2.8324740928633e-125	0.484052	0.149	0.09	6.66934349905594e-121	CD4 TCM	MINK1
4.38733001938976e-125	0.17295	0.308	0.216	1.03304072636551e-120	CD4 TCM	ADH5
4.38924974929736e-125	-1.34901	0.34	0.371	1.03349274596956e-120	CD4 TCM	SAT1
5.67570166661668e-125	0.418689	0.172	0.108	1.33640071442156e-120	CD4 TCM	NPAT
6.02230881240277e-125	0.246739	0.246	0.167	1.41801283296836e-120	CD4 TCM	GORASP2
6.77193633334227e-125	0.84555	0.103	0.055	1.59452012904877e-120	CD4 TCM	EPHA4
7.09156872198687e-125	0.48859	0.166	0.104	1.66978077127903e-120	CD4 TCM	CLSTN1
1.35815874550058e-124	1.19455	0.057	0.023	3.19792058215566e-120	CD4 TCM	CBR3-AS1
1.42781932259935e-124	-1.84565	0.021	0.055	3.36194337699242e-120	CD4 TCM	FHL3
1.57783590889186e-124	0.130982	0.378	0.275	3.71517243107678e-120	CD4 TCM	AIP
2.17169662773653e-124	0.30619	0.109	0.059	5.11347687966843e-120	CD4 TCM	CD79B
2.23385786594129e-124	2.3167	0.027	0.005	5.25984173114536e-120	CD4 TCM	GREM2
2.24274767212925e-124	0.39788	0.178	0.113	5.28077366879552e-120	CD4 TCM	PCID2
2.32143086638607e-124	-6.75522	0	0.016	5.46604111799264e-120	CD4 TCM	LINC02432
2.37794345182345e-124	-6.7157	0	0.016	5.59910565166349e-120	CD4 TCM	AL161785.1
2.47649595886219e-124	0.106057	0.522	0.394	5.83115738473691e-120	CD4 TCM	PSMB8
2.49677388371688e-124	1.24449	0.052	0.02	5.87890378659976e-120	CD4 TCM	GDPD5
2.62581500537839e-124	0.50823	0.182	0.117	6.18274401166395e-120	CD4 TCM	TAF3
2.90433462290072e-124	0.252212	0.254	0.174	6.83854630308203e-120	CD4 TCM	PDLIM2
2.96666900273033e-124	0.731922	0.082	0.04	6.98531883382883e-120	CD4 TCM	AC073111.4
3.14856831040057e-124	-1.02269	0.061	0.109	7.41361894366919e-120	CD4 TCM	SFMBT2
3.30217842315377e-124	0.618647	0.143	0.086	7.77530931515786e-120	CD4 TCM	LINC00342
3.50115685891261e-124	0.327999	0.219	0.146	8.24382393999563e-120	CD4 TCM	MORC3
4.22085645120629e-124	0.253173	0.255	0.174	9.93842860001033e-120	CD4 TCM	DAXX
5.82942782329284e-124	-0.920446	0.1	0.155	1.37259707527253e-119	CD4 TCM	LINC01871
6.7013213559585e-124	0.319459	0.219	0.145	1.57789312647399e-119	CD4 TCM	DDX50
6.77448886275015e-124	-1.17754	0.041	0.082	1.59512114762315e-119	CD4 TCM	HIP1
6.81193994997342e-124	0.734261	0.086	0.043	1.60393938062074e-119	CD4 TCM	TMEM238
1.23913751605375e-123	0.540096	0.136	0.08	2.91767319530015e-119	CD4 TCM	OXCT1
1.2657522130754e-123	0.548637	0.191	0.124	2.98034016090734e-119	CD4 TCM	STIM1
1.5873400427072e-123	-5.47347	0	0.016	3.73755086455838e-119	CD4 TCM	HK3
1.82723285370224e-123	-2.45381	0.008	0.032	4.30240247732729e-119	CD4 TCM	RNF144B
1.87770725103151e-123	0.471269	0.147	0.088	4.42124949327879e-119	CD4 TCM	C21orf91
2.16373528239861e-123	-4.9791	0	0.017	5.09473109593577e-119	CD4 TCM	LDB2
2.26531018372046e-123	0.492367	0.133	0.078	5.3338993585882e-119	CD4 TCM	DBF4
3.03479215715388e-123	0.672399	0.101	0.053	7.14572161323452e-119	CD4 TCM	TMEM116
3.21734932447432e-123	0.236581	0.222	0.148	7.57557071940723e-119	CD4 TCM	CCNG1
3.65335808460863e-123	0.212818	0.318	0.224	8.60219694601948e-119	CD4 TCM	BTN3A2
3.6789059243231e-123	0.448232	0.176	0.112	8.66235188941117e-119	CD4 TCM	NT5DC1
5.3832462225537e-123	0.440781	0.167	0.104	1.26753915556249e-118	CD4 TCM	RHOT2
5.58850452176549e-123	0.537833	0.158	0.098	1.3158692746949e-118	CD4 TCM	ZNF430
6.30164579332132e-123	0.244199	0.241	0.163	1.48378551849544e-118	CD4 TCM	DHPS
6.74442581896077e-123	-5.24492	0.001	0.017	1.5880425033325e-118	CD4 TCM	ASGR1
6.97577709786207e-123	0.150268	0.514	0.394	1.6425164754626e-118	CD4 TCM	RBM39
7.22043635131521e-123	0.941766	0.065	0.028	1.70012394328068e-118	CD4 TCM	CARMIL2
1.382793587045e-122	0.44611	0.119	0.067	3.25592578005615e-118	CD4 TCM	ABRAXAS1
1.54689348863689e-122	-1.61009	0.023	0.057	3.64231540834443e-118	CD4 TCM	PDE4A
1.54737665111566e-122	0.228591	0.338	0.245	3.64345306271694e-118	CD4 TCM	TRA2B
1.57544690471795e-122	-0.814006	0.528	0.517	3.70954728184888e-118	CD4 TCM	VAMP8
1.71858768263626e-122	-4.19159	0.001	0.019	4.04658655753534e-118	CD4 TCM	IL1R2
1.72284707222035e-122	0.284127	0.245	0.168	4.05661571625003e-118	CD4 TCM	RNF166
1.85194780605986e-122	0.455421	0.166	0.104	4.36059630414855e-118	CD4 TCM	CDK11A
1.9812490635746e-122	0.196166	0.351	0.256	4.66504904509276e-118	CD4 TCM	PRPF8
2.1305783883009e-122	0.617869	0.155	0.096	5.01665987309331e-118	CD4 TCM	MSI2
2.37391626402843e-122	0.649099	0.116	0.065	5.58962323528134e-118	CD4 TCM	ECHDC2
2.47538727917288e-122	-2.23941	0.007	0.03	5.82854688754047e-118	CD4 TCM	CHN2
3.76999644736952e-122	-3.27083	0.002	0.021	8.87683363497628e-118	CD4 TCM	TNFRSF9
3.79123868556206e-122	0.605837	0.095	0.049	8.92685060902442e-118	CD4 TCM	MTRR
4.24535292770516e-122	-1.62692	0.03	0.067	9.99610800357457e-118	CD4 TCM	FADS1
5.30401754317991e-122	0.323477	0.203	0.134	1.24888397071714e-117	CD4 TCM	USP1
5.33420811193949e-122	0.251916	0.291	0.206	1.25599264203727e-117	CD4 TCM	ANAPC5
6.91664784802511e-122	1.26848	0.043	0.015	1.62859390229599e-117	CD4 TCM	AGMAT
8.28425743539229e-122	0.20955	0.322	0.232	1.95061125573747e-117	CD4 TCM	ARHGAP4
9.37545376097351e-122	-1.21992	0.136	0.191	2.20754434255882e-117	CD4 TCM	MEF2A
1.04299461247619e-121	-2.39455	0.01	0.036	2.45583511453644e-117	CD4 TCM	GNGT2
1.7000710284845e-121	0.109817	0.954	0.83	4.0029872436696e-117	CD4 TCM	HLA-C
1.7037438008957e-121	0.54653	0.125	0.072	4.01163515358901e-117	CD4 TCM	ZNF862
1.94163740761731e-121	1.29474	0.05	0.019	4.57177943997571e-117	CD4 TCM	ZC3H12D
2.31873631599432e-121	0.159531	0.291	0.204	5.45969652964022e-117	CD4 TCM	UGP2
2.71261545688099e-121	-1.69864	0.023	0.057	6.38712435477198e-117	CD4 TCM	PEAK1
2.71533493987688e-121	0.214973	0.354	0.258	6.3935276494341e-117	CD4 TCM	SYNRG
2.9512829177188e-121	-3.72137	0.002	0.021	6.94909075806069e-117	CD4 TCM	ASRGL1
3.07041367618123e-121	0.57125	0.117	0.066	7.22959604193633e-117	CD4 TCM	SNHG3
3.97286330275903e-121	-1.15508	0.045	0.087	9.35450393267642e-117	CD4 TCM	F2R
4.08840441157781e-121	1.22255	0.05	0.019	9.6265570275011e-117	CD4 TCM	AC022916.1
4.09582613657318e-121	0.178728	0.279	0.196	9.64403222117522e-117	CD4 TCM	DNMT1
5.35252519484052e-121	0.808945	0.087	0.044	1.26030558237715e-116	CD4 TCM	ANO9
5.58838216582637e-121	0.263003	0.329	0.239	1.31584046476548e-116	CD4 TCM	PHF3
6.6493399440206e-121	0.741479	0.084	0.042	1.56565358321909e-116	CD4 TCM	AC010609.1
7.04187730709391e-121	-7.96027	0	0.015	1.65808043072833e-116	CD4 TCM	TREM1
1.11271636606432e-120	-1.89587	0.013	0.041	2.62000195553506e-116	CD4 TCM	DST
1.51295872692158e-120	-3.52148	0.002	0.02	3.56241261840955e-116	CD4 TCM	CACNA2D3
2.59307841515406e-120	0.329028	0.154	0.094	6.10566243632176e-116	CD4 TCM	SMIM27
2.67399653353332e-120	-4.61945	0.001	0.017	6.29619223785756e-116	CD4 TCM	MEF2C-AS1
2.98807855025873e-120	0.577002	0.102	0.055	7.0357297544392e-116	CD4 TCM	AGAP2
3.09595479595696e-120	0.517001	0.159	0.1	7.28973516256027e-116	CD4 TCM	EDEM3
3.21406291162422e-120	0.606214	0.108	0.06	7.56783253171039e-116	CD4 TCM	LIMA1
3.30378834627364e-120	0.195971	0.306	0.217	7.7791000401359e-116	CD4 TCM	LPXN
3.77341834998487e-120	0.327726	0.257	0.179	8.88489084687437e-116	CD4 TCM	PPHLN1
4.91359159067618e-120	0.577822	0.082	0.04	1.15695427594061e-115	CD4 TCM	TNFRSF18
5.07835714719121e-120	0.515426	0.111	0.061	1.19574997387764e-115	CD4 TCM	PYGO2
7.01889709770832e-120	-5.34718	0	0.016	1.6526695106264e-115	CD4 TCM	UGGT2
7.413182016019e-120	-3.25205	0.003	0.021	1.74550783749183e-115	CD4 TCM	CNTLN
8.02771508348222e-120	0.168408	0.331	0.238	1.89020579355672e-115	CD4 TCM	GPS2
8.59738906789758e-120	0.294254	0.216	0.144	2.02434122992716e-115	CD4 TCM	DEGS1
9.86957191207214e-120	-2.79038	0.003	0.023	2.32388940241651e-115	CD4 TCM	B3GNT5
1.0504284463414e-119	0.517122	0.128	0.074	2.47333881975546e-115	CD4 TCM	RGL4
1.12775672041495e-119	-5.6585	0	0.016	2.65541597388904e-115	CD4 TCM	AL035446.2
1.29178334497296e-119	-6.17464	0	0.016	3.04163306407334e-115	CD4 TCM	CXCL12
2.15704381955449e-119	-1.25297	0.055	0.1	5.07897537752299e-115	CD4 TCM	CHPT1
2.47413053052319e-119	-0.826785	0.368	0.4	5.82558774716991e-115	CD4 TCM	BST2
2.51486615061901e-119	0.3304	0.319	0.231	5.92150383824753e-115	CD4 TCM	SORL1
2.52518360777858e-119	0.110629	0.381	0.28	5.94579732287545e-115	CD4 TCM	YWHAQ
3.38283881951148e-119	0.424546	0.188	0.123	7.96523228442172e-115	CD4 TCM	TMEM50B
3.62318924212323e-119	-2.52683	0.005	0.026	8.53116138950337e-115	CD4 TCM	ASCL2
3.67925728082796e-119	1.3851	0.065	0.03	8.66317919343751e-115	CD4 TCM	TRBV7-2
3.74194820468196e-119	0.637823	0.124	0.071	8.81079124274414e-115	CD4 TCM	GNB5
3.7727961160137e-119	0.512564	0.115	0.064	8.88342573476586e-115	CD4 TCM	TRIM59
3.93804834359089e-119	0.277126	0.255	0.177	9.27252862981912e-115	CD4 TCM	ZNF24
4.11848053064653e-119	0.254287	0.282	0.2	9.69737425746033e-115	CD4 TCM	SNRNP70
4.31393144499342e-119	0.302694	0.239	0.165	1.01575829803815e-114	CD4 TCM	RFC1
4.69639898664239e-119	0.300312	0.249	0.172	1.10581410539482e-114	CD4 TCM	PTPN1
7.72145515744233e-119	0.398322	0.192	0.126	1.81809383137137e-114	CD4 TCM	CYP20A1
7.80822889716418e-119	0.228819	0.253	0.174	1.83852557612628e-114	CD4 TCM	DNAJC19
1.07836578752927e-118	0.298483	0.296	0.212	2.53912008331642e-114	CD4 TCM	XRN1
1.22531446524755e-118	0.111146	0.306	0.219	2.88512543987188e-114	CD4 TCM	DDX21
1.56259226327502e-118	-3.28914	0.002	0.019	3.67927974310736e-114	CD4 TCM	DBN1
1.60680816672804e-118	-1.93616	0.021	0.053	3.78339050937784e-114	CD4 TCM	IER3
1.90942762708678e-118	0.683376	0.105	0.058	4.49593829073852e-114	CD4 TCM	KLHL22
1.94366586054085e-118	-1.6826	0.033	0.071	4.57655563522948e-114	CD4 TCM	NAGA
2.03062418844717e-118	0.166256	0.465	0.354	4.78130771411772e-114	CD4 TCM	ELF1
2.20832379558592e-118	-1.42667	0.062	0.108	5.19971920908661e-114	CD4 TCM	TCEAL4
3.21324125252543e-118	0.289286	0.227	0.152	7.56589785319639e-114	CD4 TCM	LY9
3.29639470390221e-118	-5.14392	0.001	0.017	7.76169096980814e-114	CD4 TCM	CCL3L1
3.54514932597353e-118	-1.96969	0.011	0.037	8.34740860293727e-114	CD4 TCM	IL18RAP
3.7918234300452e-118	0.186769	0.239	0.163	8.92822744838443e-114	CD4 TCM	NSMCE1
4.13078543967305e-118	0.320871	0.332	0.244	9.72634739625415e-114	CD4 TCM	ANKRD11
4.38419387261691e-118	0.414538	0.176	0.112	1.03230228924638e-113	CD4 TCM	TRAF5
6.89699043112946e-118	0.178714	0.268	0.187	1.62396536691374e-113	CD4 TCM	PDCD2
1.12709053637423e-117	-1.68898	0.019	0.05	2.65384737694677e-113	CD4 TCM	GAB2
1.17199814940945e-117	0.101562	0.952	0.962	2.7595868425995e-113	CD4 TCM	RPS19
1.20849007718063e-117	-5.13369	0	0.016	2.8455107357295e-113	CD4 TCM	ST18
1.87166757569461e-117	0.236756	0.26	0.181	4.40702847373053e-113	CD4 TCM	SRP19
4.92968085291362e-117	-1.68976	0.025	0.058	1.16074265362704e-112	CD4 TCM	RGS1
5.86635207619306e-117	-5.0833	0.001	0.016	1.38129125986042e-112	CD4 TCM	AP001636.3
6.11633234421972e-117	1.96507	0.03	0.007	1.44015161376998e-112	CD4 TCM	LINC01876
6.35021824147799e-117	-1.21518	0.247	0.291	1.49522238713841e-112	CD4 TCM	SDCBP
6.73671324204205e-117	0.458593	0.146	0.089	1.58622649997122e-112	CD4 TCM	DEDD2
7.19503821089335e-117	0.508225	0.13	0.077	1.69414369713695e-112	CD4 TCM	BCL9L
8.77751771552168e-117	0.434565	0.229	0.158	2.06675432129673e-112	CD4 TCM	INPP4A
8.9051166288681e-117	0.530811	0.152	0.094	2.09679876143328e-112	CD4 TCM	ATXN7L1
9.36419162480223e-117	0.336736	0.242	0.168	2.20489255997593e-112	CD4 TCM	WDR33
9.41188425377979e-117	0.183117	0.494	0.379	2.21612226639499e-112	CD4 TCM	DOCK8
1.6182656087675e-116	0.241759	0.229	0.155	3.81036820240395e-112	CD4 TCM	TNIP1
1.71152400589855e-116	0.134488	0.443	0.334	4.02995442428872e-112	CD4 TCM	EIF5
1.78742024268789e-116	0.27323	0.177	0.113	4.20865970343291e-112	CD4 TCM	LETMD1
1.87835970353383e-116	0.379674	0.177	0.113	4.42278575794075e-112	CD4 TCM	SRPK1
2.16919878293768e-116	1.21525	0.059	0.026	5.10759545430506e-112	CD4 TCM	TRAV8-4
2.44560773534691e-116	0.285382	0.176	0.113	5.75842797364784e-112	CD4 TCM	EBPL
2.57755702988243e-116	0.537477	0.183	0.12	6.06911578256117e-112	CD4 TCM	ARID2
2.91397953637236e-116	0.166799	0.348	0.254	6.86125621634235e-112	CD4 TCM	ILF3
3.42433302470238e-116	-1.13317	0.08	0.129	8.06293453996422e-112	CD4 TCM	SNX10
3.81146810598585e-116	0.892399	0.06	0.026	8.97448280235427e-112	CD4 TCM	LINC02361
3.93579522103724e-116	0.151924	0.416	0.311	9.26722342745429e-112	CD4 TCM	DDX39B
4.87805400663784e-116	0.305535	0.253	0.176	1.14858659640295e-111	CD4 TCM	MAD1L1
5.06181486976355e-116	0.200946	0.383	0.287	1.19185492923453e-111	CD4 TCM	RBM25
5.87731137256433e-116	1.04127	0.059	0.025	1.383871735784e-111	CD4 TCM	TRAV13-2
6.04274865471759e-116	-2.8699	0.006	0.029	1.4228255982398e-111	CD4 TCM	IL3RA
6.30380115540398e-116	0.14658	0.349	0.255	1.48429302005142e-111	CD4 TCM	PNRC2
9.23110554635984e-116	0.677131	0.114	0.065	2.17355611194589e-111	CD4 TCM	APOLD1
1.14549864106049e-115	0.226512	0.284	0.201	2.69719110024103e-111	CD4 TCM	RBM4
1.33272148226145e-115	0.921725	0.071	0.034	3.13802600213281e-111	CD4 TCM	RAB3IP
1.39169055043937e-115	0.412751	0.174	0.112	3.27687457006454e-111	CD4 TCM	MTAP
1.39425103753942e-115	0.217646	0.227	0.154	3.28290349299032e-111	CD4 TCM	ALKBH5
1.45929697089925e-115	-5.60797	0	0.016	3.43606064767936e-111	CD4 TCM	SIGLEC10
1.4804386675411e-115	-3.46678	0.002	0.02	3.48584088659227e-111	CD4 TCM	TNFRSF11A
1.70652819142984e-115	0.496647	0.129	0.076	4.01819127954071e-111	CD4 TCM	AP002387.2
1.70940234081954e-115	0.135139	0.319	0.229	4.0249587516937e-111	CD4 TCM	RNPEPL1
2.20431691424737e-115	0.445249	0.128	0.075	5.19028460628687e-111	CD4 TCM	UBL4A
2.47828364233989e-115	0.19719	0.305	0.218	5.83536666425351e-111	CD4 TCM	STAT3
3.01998123003727e-115	0.412517	0.147	0.09	7.11084780424575e-111	CD4 TCM	LGALS8
3.04273875334015e-115	0.326944	0.206	0.137	7.16443266861472e-111	CD4 TCM	RNF44
3.18090148363053e-115	-2.94921	0.007	0.029	7.48975063335645e-111	CD4 TCM	RAMP1
4.163317581943e-115	1.92993	0.034	0.01	9.80294757844298e-111	CD4 TCM	KANK1
5.3571044137366e-115	0.290446	0.209	0.14	1.26138380525842e-110	CD4 TCM	ATXN7L3B
6.5553070079906e-115	-4.55069	0.002	0.019	1.54351258810147e-110	CD4 TCM	SLC12A5
7.42238038933741e-115	0.451196	0.189	0.124	1.74767368647339e-110	CD4 TCM	PIBF1
9.50517944255206e-115	0.200871	0.42	0.315	2.23808955154331e-110	CD4 TCM	DPYD
1.19534745275584e-114	-3.79945	0.002	0.02	2.81456511225891e-110	CD4 TCM	LHFPL2
1.26978545384821e-114	0.107003	0.853	0.766	2.989836829631e-110	CD4 TCM	COX7C
1.53831006456413e-114	0.453071	0.116	0.066	3.62210487802269e-110	CD4 TCM	PITPNA-AS1
1.97522818338384e-114	0.448484	0.15	0.093	4.65087228059559e-110	CD4 TCM	FBXO3
2.13238566673827e-114	0.218384	0.312	0.224	5.02091529090194e-110	CD4 TCM	ADGRE5
2.19855542020519e-114	0.679797	0.103	0.057	5.17671859241514e-110	CD4 TCM	RBL1
2.86601170550217e-114	0.389299	0.144	0.087	6.74831116177541e-110	CD4 TCM	PLEKHF1
3.00831344633838e-114	-6.63735	0	0.015	7.08337484074835e-110	CD4 TCM	TLR10
3.32962610875357e-114	-4.12451	0.001	0.018	7.83993763567115e-110	CD4 TCM	KIF13A
4.29396290772171e-114	-1.78514	0.051	0.093	1.01105650625215e-109	CD4 TCM	LY96
4.76826803900173e-114	-5.92113	0	0.015	1.12273639246335e-109	CD4 TCM	KHDRBS2
4.91191919706481e-114	-0.898859	0.27	0.316	1.15656049414088e-109	CD4 TCM	CNPY3
5.76711532223795e-114	-1.57305	0.05	0.092	1.35792497377415e-109	CD4 TCM	GCA
5.86019526729909e-114	-5.64434	0.001	0.016	1.37984157763824e-109	CD4 TCM	NR4A3
6.16026064556493e-114	1.35607	0.04	0.013	1.45049497160472e-109	CD4 TCM	EEPD1
6.33759768325579e-114	-2.16988	0.006	0.027	1.49225075049941e-109	CD4 TCM	CDK14
6.72304256119152e-114	-3.99655	0.001	0.017	1.58300760145815e-109	CD4 TCM	ITGB5
8.92430083292103e-114	0.552744	0.108	0.061	2.10131587411958e-109	CD4 TCM	NOL9
9.33697826105784e-114	0.752109	0.079	0.039	2.19848490134868e-109	CD4 TCM	MAGEH1
9.66025773269271e-114	0.573434	0.098	0.053	2.27460428573983e-109	CD4 TCM	UBIAD1
1.07887491231025e-113	0.16565	0.332	0.241	2.54031886852571e-109	CD4 TCM	CCNDBP1
1.28683073995074e-113	0.242992	0.286	0.205	3.02997166028802e-109	CD4 TCM	GGNBP2
1.331724204694e-113	0.48326	0.175	0.115	3.13567781237248e-109	CD4 TCM	FOXJ3
1.33527913358602e-113	0.18504	0.251	0.174	3.14404824794165e-109	CD4 TCM	PPP6C
1.40199386017241e-113	0.638584	0.089	0.047	3.30113474316196e-109	CD4 TCM	FXYD7
1.5152291217609e-113	-2.19224	0.011	0.036	3.56775849009822e-109	CD4 TCM	TNIP3
1.76218893644925e-113	0.251965	0.284	0.203	4.14925006976339e-109	CD4 TCM	LMBRD1
1.98861092255679e-113	0.328524	0.216	0.147	4.68238327825223e-109	CD4 TCM	TMEM248
1.99050044006334e-113	0.410297	0.17	0.109	4.68683233617313e-109	CD4 TCM	MSMO1
2.06831125669578e-113	2.13947	0.025	0.005	4.87004568501588e-109	CD4 TCM	FAM153B
2.14942543467343e-113	0.379826	0.194	0.129	5.06103712848207e-109	CD4 TCM	ZNF721
2.46942077130457e-113	1.55586	0.031	0.008	5.81449814811375e-109	CD4 TCM	PLD6
2.60296890764189e-113	0.606599	0.112	0.064	6.12895058993358e-109	CD4 TCM	ENTPD4
2.65113836828772e-113	0.101799	0.22	0.147	6.24237040197026e-109	CD4 TCM	PLAC8
3.46995895723662e-113	0.705456	0.084	0.043	8.17036536070934e-109	CD4 TCM	RFLNB
5.57984969528207e-113	0.481272	0.14	0.085	1.31383140925112e-108	CD4 TCM	ILF3-DT
5.62154167432086e-113	0.107766	0.251	0.17	1.32364820263559e-108	CD4 TCM	SH2D2A
6.62870997692262e-113	0.366166	0.267	0.19	1.5607960511662e-108	CD4 TCM	CCDC91
8.12919943951574e-113	0.259098	0.203	0.136	1.91410130002838e-108	CD4 TCM	PRNP
8.41595242704654e-113	-5.9634	0	0.015	1.98162015847238e-108	CD4 TCM	P2RX1
8.44223961633138e-113	0.116205	0.38	0.28	1.98780974006139e-108	CD4 TCM	PSMA5
9.13564697853894e-113	0.688662	0.105	0.058	2.15107943756678e-108	CD4 TCM	L3MBTL3
1.34146276733116e-112	0.556163	0.125	0.074	3.15860823195795e-108	CD4 TCM	USP20
1.45680065283795e-112	0.830591	0.063	0.028	3.43018281717224e-108	CD4 TCM	AEN
2.04162658261009e-112	-3.28485	0.003	0.02	4.80721395141371e-108	CD4 TCM	PRSS23
2.07246491589887e-112	0.115944	0.301	0.215	4.87982589097548e-108	CD4 TCM	CNOT7
2.07783959335465e-112	0.235204	0.257	0.181	4.89248110651286e-108	CD4 TCM	YME1L1
2.15279554976327e-112	0.499039	0.141	0.087	5.06897240147259e-108	CD4 TCM	ZC3H6
2.69002601745823e-112	0.746814	0.101	0.056	6.33393526070714e-108	CD4 TCM	Z93930.2
2.7693401099553e-112	-4.77663	0.001	0.016	6.52068822290074e-108	CD4 TCM	LILRA6
2.82211325543846e-112	0.37896	0.157	0.098	6.6449478712554e-108	CD4 TCM	NAE1
4.40357561998375e-112	0.160598	0.431	0.326	1.03686591548137e-107	CD4 TCM	SF3B1
4.46128346270388e-112	0.385818	0.162	0.103	1.05045380412826e-107	CD4 TCM	SGF29
4.51077807120711e-112	0.330373	0.167	0.107	1.06210780464643e-107	CD4 TCM	PYM1
4.59367827783621e-112	0.370514	0.114	0.066	1.08162748729931e-107	CD4 TCM	APP
4.97478772523258e-112	-2.33687	0.012	0.038	1.17136351778326e-107	CD4 TCM	RAB20
5.59395128312411e-112	0.475483	0.112	0.064	1.3171517691244e-107	CD4 TCM	MED16
6.3865754303963e-112	0.331704	0.203	0.136	1.50378305084111e-107	CD4 TCM	CWF19L2
6.85595944460282e-112	0.419132	0.17	0.11	1.61430421082618e-107	CD4 TCM	PURA
7.24258687744503e-112	-6.1783	0	0.015	1.70533950616321e-107	CD4 TCM	SEL1L2
7.27887006646802e-112	0.113934	0.532	0.411	1.71388274585056e-107	CD4 TCM	CAST
8.50388978228651e-112	-7.83559	0	0.014	2.00232588813718e-107	CD4 TCM	CD276
1.17664376319023e-111	1.11058	0.047	0.018	2.77052540480771e-107	CD4 TCM	CITED4
1.32981909341355e-111	0.170213	0.428	0.327	3.13119203735155e-107	CD4 TCM	SCAF11
1.7734924080608e-111	0.475938	0.159	0.101	4.17586522401995e-107	CD4 TCM	LPIN1
2.07417119269738e-111	0.413367	0.178	0.116	4.88384349032524e-107	CD4 TCM	ANKRD49
2.15069968348452e-111	0.14641	0.429	0.328	5.06403747473266e-107	CD4 TCM	MT-ND6
2.2064886147322e-111	-1.50778	0.017	0.046	5.19539809224845e-107	CD4 TCM	ATP10D
2.88770242491924e-111	0.103272	0.326	0.235	6.79938412971484e-107	CD4 TCM	ANXA7
2.89992256064452e-111	0.482623	0.264	0.19	6.8281576612936e-107	CD4 TCM	KANSL1
3.39419167286939e-111	0.429147	0.166	0.107	7.99196371293826e-107	CD4 TCM	CAMK2G
4.15912405520517e-111	0.491908	0.155	0.098	9.7930735003861e-107	CD4 TCM	VPS13A
5.6797838833229e-111	0.214297	0.282	0.201	1.33736191316721e-106	CD4 TCM	CITED2
7.68471626543013e-111	-6.09012	0	0.015	1.80944329185818e-106	CD4 TCM	LNCAROD
8.52385993241826e-111	-5.60363	0	0.015	2.0070280596872e-106	CD4 TCM	MITF
1.26177570117267e-110	0.345863	0.183	0.121	2.97097706598116e-106	CD4 TCM	INTS10
1.2743208950417e-110	0.425782	0.216	0.149	3.00051597946518e-106	CD4 TCM	DOCK11
1.2992606713099e-110	0.302063	0.267	0.191	3.0592391766663e-106	CD4 TCM	UPF2
1.68957480704565e-110	1.09582	0.049	0.019	3.97827284066968e-106	CD4 TCM	Z94721.1
1.84299615841637e-110	0.25863	0.23	0.159	4.33951875460718e-106	CD4 TCM	SMC3
2.1177728188317e-110	0.259976	0.239	0.166	4.98650787922112e-106	CD4 TCM	GTF2B
2.95669467638429e-110	0.644629	0.097	0.054	6.96183328501445e-106	CD4 TCM	C1GALT1C1
3.42101329612774e-110	-3.04625	0.003	0.022	8.05511790706238e-106	CD4 TCM	TLE1
4.90301030380699e-110	0.312365	0.172	0.111	1.15446280613439e-105	CD4 TCM	CHORDC1
5.35297287071188e-110	0.62839	0.098	0.054	1.26041099213782e-105	CD4 TCM	MTM1
5.49046686218348e-110	-2.70521	0.003	0.022	1.29278532736972e-105	CD4 TCM	TTYH3
5.58249605805952e-110	0.3351	0.259	0.184	1.31445452183069e-105	CD4 TCM	GPATCH8
5.99101822062177e-110	-0.81633	0.425	0.439	1.4106451502276e-105	CD4 TCM	SNX3
7.38782663012405e-110	0.737827	0.121	0.072	1.73953765832901e-105	CD4 TCM	DIP2B
8.56304580576386e-110	-1.1231	0.051	0.093	2.01625476542516e-105	CD4 TCM	LAG3
1.12537733041836e-109	0.668341	0.125	0.075	2.64981346220306e-105	CD4 TCM	SMG6
1.30471080359839e-109	0.875777	0.066	0.031	3.07207205815277e-105	CD4 TCM	HRH2
1.91808652133074e-109	-2.67025	0.005	0.025	4.51632652312537e-105	CD4 TCM	CD40
1.96532948420214e-109	0.264808	0.273	0.193	4.62756480350236e-105	CD4 TCM	CCSER2
1.98219097103057e-109	0.48033	0.142	0.088	4.66726686038859e-105	CD4 TCM	SNHG15
2.27685702183408e-109	-0.266578	0.888	0.857	5.36108754361053e-105	CD4 TCM	PPIA
2.55210423825788e-109	0.116796	0.241	0.167	6.00918463940201e-105	CD4 TCM	PFKL
2.80396224747201e-109	0.119615	0.41	0.31	6.60220950789759e-105	CD4 TCM	SFPQ
2.91676946414723e-109	0.55879	0.159	0.102	6.86782538028107e-105	CD4 TCM	UMAD1
3.30622700953005e-109	-5.02192	0.001	0.015	7.78484211663945e-105	CD4 TCM	HAAO
3.73114238553402e-109	2.17518	0.023	0.004	8.78534786097842e-105	CD4 TCM	AC103563.7
3.772806308693e-109	0.317745	0.271	0.195	8.88344973444854e-105	CD4 TCM	CCDC18-AS1
4.75044363144415e-109	0.299343	0.29	0.211	1.11853945745984e-104	CD4 TCM	PHIP
5.02288145878798e-109	0.298355	0.207	0.139	1.18268766828622e-104	CD4 TCM	GPR174
5.57384807395084e-109	-5.33607	0.001	0.016	1.31241826749246e-104	CD4 TCM	LINC01374
5.78920338307524e-109	0.14546	0.317	0.23	1.3631258285789e-104	CD4 TCM	XRN2
6.95471020036987e-109	0.577882	0.126	0.075	1.63755606377909e-104	CD4 TCM	ZNF107
7.97517484725251e-109	0.413607	0.153	0.097	1.87783466953408e-104	CD4 TCM	SIRT7
1.02956244899487e-108	0.320984	0.121	0.071	2.42420774240333e-104	CD4 TCM	UGCG
1.25141342152626e-108	-2.58848	0.007	0.028	2.94657804232573e-104	CD4 TCM	P2RY14
1.28930851959592e-108	2.48015	0.021	0.003	3.03580584024056e-104	CD4 TCM	RHBDL1
1.39073251142618e-108	0.486185	0.125	0.074	3.27461877140409e-104	CD4 TCM	VAMP4
1.50758595298163e-108	-2.2283	0.006	0.027	3.54976188489054e-104	CD4 TCM	SLC4A4
1.63933954856931e-108	-4.9844	0.001	0.016	3.8599889010613e-104	CD4 TCM	LINC02381
2.00421885875164e-108	0.185352	0.319	0.23	4.71913372481662e-104	CD4 TCM	RASAL3
2.34940404217455e-108	0.340052	0.321	0.237	5.5319067577042e-104	CD4 TCM	RBMS1
2.37877280996453e-108	-3.74402	0.002	0.018	5.60105845834248e-104	CD4 TCM	LINC00937
2.60212322282245e-108	0.101045	0.849	0.766	6.12695934045774e-104	CD4 TCM	TOMM7
2.80883706970845e-108	0.468487	0.151	0.096	6.61368776433553e-104	CD4 TCM	ANKH
3.1763022637366e-108	0.114224	0.452	0.342	7.47892131019419e-104	CD4 TCM	THRAP3
5.13801162222233e-108	0.458342	0.22	0.153	1.20979621656847e-103	CD4 TCM	KDM4C
6.01782474634871e-108	0.115814	0.341	0.25	1.41695701477527e-103	CD4 TCM	HNRNPH3
6.03545144914033e-108	0.334577	0.166	0.107	1.42110739821458e-103	CD4 TCM	GBP4
6.9972854762006e-108	0.127802	0.416	0.312	1.64758083822619e-103	CD4 TCM	TERF2IP
7.45532301287658e-108	0.471259	0.135	0.082	1.75543035661192e-103	CD4 TCM	DNAJB9
7.57455629675076e-108	0.11225	0.257	0.181	1.78350502563293e-103	CD4 TCM	CNIH1
8.76535915428486e-108	0.435437	0.154	0.097	2.06389146646791e-103	CD4 TCM	AC008875.3
1.14484891982324e-107	0.380492	0.163	0.104	2.6956612666158e-103	CD4 TCM	P2RY10
1.16169116528328e-107	0.229501	0.264	0.188	2.73531801777601e-103	CD4 TCM	SDF4
1.2587812615987e-107	0.4318	0.2	0.136	2.9639263585603e-103	CD4 TCM	CDK6
1.45736471053427e-107	0.297974	0.262	0.187	3.43151094742398e-103	CD4 TCM	PTPRA
1.69315470714966e-107	0.407821	0.127	0.077	3.98670207345459e-103	CD4 TCM	TMEM60
2.24651216453323e-107	0.370429	0.17	0.111	5.28963754260995e-103	CD4 TCM	TMEM154
3.03419229576499e-107	0.309731	0.205	0.139	7.14430917960825e-103	CD4 TCM	RRP1B
3.08315154913932e-107	0.245005	0.33	0.245	7.25958863760345e-103	CD4 TCM	RSF1
5.49464520252877e-107	-4.08297	0.001	0.016	1.29376915938742e-102	CD4 TCM	CYBRD1
6.3094477608043e-107	-1.0517	0.253	0.294	1.48562256975898e-102	CD4 TCM	AP2S1
7.84878134843378e-107	0.280454	0.236	0.165	1.84807405630222e-102	CD4 TCM	USP16
8.79444312194659e-107	0.412647	0.159	0.102	2.07073957749354e-102	CD4 TCM	ZNF91
1.13234266147515e-106	0.121315	0.794	0.662	2.6662140307094e-102	CD4 TCM	MYL12B
1.46539879019902e-106	0.771364	0.072	0.035	3.45042799140262e-102	CD4 TCM	CYB561D2.1
1.57181571441202e-106	0.256393	0.313	0.229	3.70099728115454e-102	CD4 TCM	LNPEP
1.66813582357235e-106	-3.43151	0.001	0.017	3.92779261018346e-102	CD4 TCM	MIR99AHG
1.76187018280862e-106	-2.19895	0.02	0.049	4.14849953244117e-102	CD4 TCM	C1orf54
1.86160789609315e-106	-2.69915	0.007	0.028	4.38334195214092e-102	CD4 TCM	TST
2.08829552961684e-106	-1.77075	0.015	0.042	4.9171006540358e-102	CD4 TCM	RXRA
2.91849325505066e-106	-3.38663	0.002	0.018	6.87188421834228e-102	CD4 TCM	PHACTR1
2.99314525882258e-106	2.57019	0.02	0.003	7.04765982642365e-102	CD4 TCM	ADAM23
3.28290132805371e-106	0.165374	0.237	0.164	7.72991946703526e-102	CD4 TCM	PSMD6
3.34441773993987e-106	1.89101	0.024	0.005	7.87476601046243e-102	CD4 TCM	RGS16
3.79780484288548e-106	-1.2748	0.028	0.061	8.94231128305816e-102	CD4 TCM	IKZF2
5.2104325931135e-106	0.342188	0.173	0.113	1.2268484583745e-101	CD4 TCM	MITD1
5.24918473523587e-106	0.341916	0.178	0.117	1.23597303775864e-101	CD4 TCM	JAGN1
7.53097211069448e-106	-3.07073	0.002	0.019	1.77324269318412e-101	CD4 TCM	ZNF618
7.98720278443968e-106	0.379423	0.124	0.074	1.88066676762417e-101	CD4 TCM	DALRD3
1.19121141773647e-105	0.517484	0.151	0.096	2.8048264042023e-101	CD4 TCM	TMEM87B
1.30503009732993e-105	0.320327	0.2	0.136	3.07282386717305e-101	CD4 TCM	ITGB2-AS1
1.31433142552877e-105	0.312586	0.177	0.116	3.09472477455003e-101	CD4 TCM	NCBP2AS2
1.46382967036121e-105	0.397651	0.143	0.089	3.4467333418325e-101	CD4 TCM	BATF
1.88466319658061e-105	0.638363	0.101	0.057	4.43762796266871e-101	CD4 TCM	EIF4E3
2.14535042802005e-105	0.232562	0.281	0.203	5.051442117816e-101	CD4 TCM	PNN
2.49176363535134e-105	0.330706	0.209	0.144	5.86710665579826e-101	CD4 TCM	CREB1
2.98212202105249e-105	0.491813	0.127	0.077	7.02170451077019e-101	CD4 TCM	TRMO
3.5084375176027e-105	0.688859	0.096	0.054	8.26096697894731e-101	CD4 TCM	SYNE3
4.19651872885217e-105	0.170983	0.241	0.168	9.88112299895532e-101	CD4 TCM	PIH1D1
4.19857513105317e-105	-5.26774	0	0.014	9.88596500357779e-101	CD4 TCM	CMKLR1
5.56654358004729e-105	-6.22183	0	0.013	1.31069835135793e-100	CD4 TCM	WLS
5.74033162530592e-105	0.116561	0.905	0.813	1.35161848449453e-100	CD4 TCM	ARHGDIB
6.68035618969501e-105	0.418856	0.21	0.145	1.57295666842559e-100	CD4 TCM	PPP6R3
6.73636227011386e-105	0.248632	0.168	0.109	1.58614386012101e-100	CD4 TCM	MRPL17
7.21441698629248e-105	-1.93756	0.009	0.032	1.69870662359243e-100	CD4 TCM	SEMA4A
1.02065809556201e-104	0.423243	0.241	0.172	2.4032415518103e-100	CD4 TCM	ZCCHC7
1.36662294914593e-104	0.32745	0.17	0.111	3.217850396059e-100	CD4 TCM	TRIM14
1.4378035247736e-104	-5.85219	0	0.013	3.38545217943192e-100	CD4 TCM	ASGR2
1.45853656468786e-104	0.915515	0.063	0.029	3.43427019521405e-100	CD4 TCM	LIMK2
1.49741431258996e-104	-5.99189	0	0.014	3.52581174042432e-100	CD4 TCM	TLR8
3.661396939329e-104	0.433541	0.123	0.074	8.62112523334406e-100	CD4 TCM	ZNF33B
3.82132351473312e-104	0.550128	0.138	0.086	8.99768834779059e-100	CD4 TCM	RUNX2
4.18796528925976e-104	-1.09774	0.111	0.161	9.86098307009102e-100	CD4 TCM	FEZ2
4.38661195903404e-104	0.954686	0.057	0.025	1.03287165187415e-99	CD4 TCM	TRAF3IP2
5.20871323582924e-104	0.494866	0.164	0.106	1.22644361850835e-99	CD4 TCM	TNRC6C
5.3362274648963e-104	-3.98003	0.002	0.018	1.25646811888448e-99	CD4 TCM	PMFBP1
7.99054305846381e-104	0.477587	0.129	0.079	1.88145326854589e-99	CD4 TCM	WDR6
8.53795299537626e-104	0.198954	0.276	0.199	2.01034641229129e-99	CD4 TCM	TIAL1
1.03573840362193e-103	-3.44368	0.005	0.024	2.4387496451682e-99	CD4 TCM	NR4A1
1.43042179039864e-103	-2.76232	0.003	0.021	3.36807114767264e-99	CD4 TCM	ARL11
1.47953164866769e-103	0.699381	0.082	0.043	3.48370521995295e-99	CD4 TCM	CHD7
1.54192581425204e-103	0.328641	0.223	0.156	3.63061852223786e-99	CD4 TCM	PHF14
1.75945336968972e-103	-1.27857	0.04	0.076	4.14280890427141e-99	CD4 TCM	RHBDF2
2.10476222444687e-103	0.860181	0.071	0.035	4.95587313368261e-99	CD4 TCM	NDUFV2-AS1
2.29217023392903e-103	0.168195	0.165	0.106	5.3971440328093e-99	CD4 TCM	BOLA3
2.40166949976673e-103	0.344309	0.266	0.193	5.65497100415074e-99	CD4 TCM	RBM6
3.03822169191906e-103	-1.28465	0.147	0.196	7.15379679579261e-99	CD4 TCM	ASAH1
3.84456675355381e-103	0.360224	0.169	0.11	9.05241687791781e-99	CD4 TCM	EBLN3P
5.05785111345434e-103	0.710632	0.082	0.043	1.19092162317396e-98	CD4 TCM	ZNF507
5.33929809627629e-103	0.316392	0.178	0.118	1.25719112974921e-98	CD4 TCM	KRR1
5.45558856134047e-103	0.207667	0.183	0.122	1.28457288265323e-98	CD4 TCM	ZNF524
5.62931992055071e-103	0.164438	0.224	0.155	1.32547966849287e-98	CD4 TCM	NIFK
5.91182365742411e-103	0.248613	0.248	0.175	1.39199799837708e-98	CD4 TCM	CEP57
6.44777641729157e-103	0.217572	0.343	0.257	1.51819343521547e-98	CD4 TCM	WNK1
7.36021110905266e-103	0.264256	0.23	0.161	1.73303530773754e-98	CD4 TCM	FIP1L1
8.55122143219737e-103	0.86519	0.074	0.038	2.01347059842519e-98	CD4 TCM	ANKRD28
8.87085733603757e-103	1.00505	0.059	0.027	2.08873206834341e-98	CD4 TCM	HS3ST3B1
9.78510479872509e-103	0.283567	0.298	0.22	2.30400077590781e-98	CD4 TCM	SMARCA2
1.11870321564814e-102	0.356939	0.206	0.142	2.6340985915651e-98	CD4 TCM	CTCF
1.48460510749813e-102	0.219986	0.255	0.182	3.4956511861151e-98	CD4 TCM	CEBPZ
1.60472417344005e-102	-6.56688	0	0.013	3.77848353878194e-98	CD4 TCM	CD19
1.93004244523285e-102	-2.21444	0.004	0.022	4.54447794154527e-98	CD4 TCM	MOB3B
2.00604680981342e-102	0.1175	0.347	0.257	4.72343781838669e-98	CD4 TCM	SCAND1
2.0481032600292e-102	-2.58284	0.006	0.025	4.82246393606475e-98	CD4 TCM	ITSN1
2.32714443057915e-102	0.19036	0.241	0.169	5.47949427624167e-98	CD4 TCM	SDHAF2
2.36908910700428e-102	1.85339	0.027	0.007	5.57825721135227e-98	CD4 TCM	ALS2CL
3.37712568203304e-102	0.364166	0.175	0.116	7.95178013091499e-98	CD4 TCM	ZFC3H1
3.64599835189508e-102	0.779594	0.07	0.034	8.58486771937217e-98	CD4 TCM	SLC35C1
5.77029053063336e-102	0.854918	0.052	0.022	1.35867260834293e-97	CD4 TCM	PCBP4
6.74937341795947e-102	0.660988	0.101	0.058	1.58920746499274e-97	CD4 TCM	ZNF44
7.02390447399911e-102	0.140238	0.244	0.171	1.65384854744783e-97	CD4 TCM	POLR2I
1.13526718281375e-101	0.117545	0.345	0.257	2.67310010865325e-97	CD4 TCM	DCXR
1.99218464124278e-101	0.336877	0.272	0.199	4.69079795627026e-97	CD4 TCM	TTC17
2.17572465228644e-101	1.78641	0.025	0.006	5.12296126627364e-97	CD4 TCM	SOGA3
2.76494577259815e-101	0.30806	0.226	0.159	6.5103413161596e-97	CD4 TCM	MAN1A2
2.77494171037657e-101	-1.89157	0.016	0.043	6.53387775125266e-97	CD4 TCM	TTC38
2.88286507318148e-101	0.206535	0.239	0.168	6.78799410131311e-97	CD4 TCM	YTHDF2
3.21963857043956e-101	0.416587	0.12	0.072	7.580960977957e-97	CD4 TCM	DBP
4.22628338774451e-101	-3.48403	0.002	0.017	9.95120686478322e-97	CD4 TCM	NREP
4.22882883066378e-101	2.35051	0.022	0.004	9.95720036468093e-97	CD4 TCM	HECW2-AS1
5.84669820162786e-101	0.155874	0.222	0.153	1.3766635585553e-96	CD4 TCM	METTL5
6.82700429618317e-101	0.176257	0.264	0.188	1.60748643157929e-96	CD4 TCM	DDX39A
8.39933650034292e-101	-3.7894	0.002	0.017	1.97770777237074e-96	CD4 TCM	SRGAP1
1.02248216910465e-100	1.10322	0.054	0.024	2.40753651537381e-96	CD4 TCM	PKP4
1.17455065608516e-100	0.547307	0.116	0.069	2.76559697481812e-96	CD4 TCM	PGS1
[truncated: 164,182 more rows]

## Sheet: pbmcL1.labelL2.markers.atresL1
p_val	avg_log2FC	pct.1	pct.2	p_val_adj	cluster	gene
0	2.91453	0.985	0.161	0	CD14M_1	VCAN
0	2.63055	0.991	0.186	0	CD14M_1	FCN1
0	2.85332	0.909	0.11	0	CD14M_1	S100A12
0	2.56146	0.929	0.153	0	CD14M_1	MNDA
0	2.58742	0.999	0.224	0	CD14M_1	S100A8
0	3.45569	0.999	0.236	0	CD14M_1	S100A9
0	2.93283	0.864	0.103	0	CD14M_1	CD14
0	2.65468	0.878	0.119	0	CD14M_1	MS4A6A
0	2.79849	1	0.241	0	CD14M_1	LYZ
0	2.04619	0.998	0.241	0	CD14M_1	CST3
0	2.0219	0.995	0.244	0	CD14M_1	IFI30
0	2.07213	0.888	0.149	0	CD14M_1	SERPINA1
0	2.1196	0.917	0.18	0	CD14M_1	SPI1
0	1.6273	0.948	0.213	0	CD14M_1	LST1
0	2.44866	0.854	0.124	0	CD14M_1	CSTA
0	2.66393	0.828	0.104	0	CD14M_1	CSF3R
0	1.77115	0.98	0.26	0	CD14M_1	AIF1
0	2.18462	0.915	0.208	0	CD14M_1	TYMP
0	2.36008	0.827	0.134	0	CD14M_1	PLXDC2
0	2.24645	0.846	0.159	0	CD14M_1	CYBB
0	1.96903	0.827	0.149	0	CD14M_1	CFD
0	2.40587	0.859	0.189	0	CD14M_1	GRN
0	1.39026	0.96	0.299	0	CD14M_1	FCER1G
0	-5.94239	0.061	0.718	0	CD14M_1	IFITM1
0	2.14308	0.854	0.198	0	CD14M_1	CEBPD
0	1.92473	0.998	0.345	0	CD14M_1	TYROBP
0	2.51148	0.767	0.115	0	CD14M_1	NCF2
0	2.12853	0.84	0.193	0	CD14M_1	RNF130
0	2.05166	0.832	0.188	0	CD14M_1	LGALS3
0	0.837814	0.922	0.283	0	CD14M_1	HLA-DRA
0	2.17223	0.762	0.124	0	CD14M_1	CD68
0	2.28502	0.81	0.184	0	CD14M_1	APLP2
0	2.05475	0.756	0.144	0	CD14M_1	FGL2
0	2.73881	0.691	0.081	0	CD14M_1	CD36
0	2.47775	0.744	0.134	0	CD14M_1	BLVRB
0	2.41642	0.703	0.099	0	CD14M_1	TNFAIP2
0	2.2335	0.737	0.136	0	CD14M_1	CD302
0	2.05572	0.993	0.394	0	CD14M_1	CTSS
0	2.23567	0.731	0.135	0	CD14M_1	CFP
0	2.35765	0.699	0.104	0	CD14M_1	CPVL
0	1.83629	0.966	0.371	0	CD14M_1	LGALS1
0	2.46932	0.682	0.094	0	CD14M_1	LRMDA
0	2.25249	0.693	0.106	0	CD14M_1	CLEC7A
0	2.01331	0.831	0.245	0	CD14M_1	AP1S2
0	2.3091	0.688	0.108	0	CD14M_1	RAB31
0	1.61738	0.857	0.279	0	CD14M_1	ZEB2
0	2.02041	0.695	0.12	0	CD14M_1	HCK
0	2.75201	0.656	0.082	0	CD14M_1	LGALS2
0	1.12457	0.904	0.332	0	CD14M_1	HLA-DRB1
0	2.33326	0.674	0.104	0	CD14M_1	SLC11A1
0	1.87972	0.745	0.177	0	CD14M_1	ARHGAP26
0	2.03247	0.919	0.352	0	CD14M_1	TKT
0	2.13913	0.734	0.168	0	CD14M_1	FCGRT
0	2.26169	0.668	0.105	0	CD14M_1	MPEG1
0	1.62438	0.787	0.225	0	CD14M_1	FGR
0	1.8514	0.719	0.158	0	CD14M_1	TBXAS1
0	2.52385	0.641	0.081	0	CD14M_1	FPR1
0	1.77744	0.817	0.26	0	CD14M_1	NCF1
0	2.03198	0.725	0.168	0	CD14M_1	JAML
0	2.57495	0.637	0.083	0	CD14M_1	LRP1
0	-6.92386	0.019	0.573	0	CD14M_1	CD3E
0	1.67136	0.85	0.297	0	CD14M_1	PYCARD
0	-6.85054	0.037	0.587	0	CD14M_1	IL32
0	1.3202	0.789	0.24	0	CD14M_1	LYN
0	2.12601	0.665	0.117	0	CD14M_1	TNFSF13B
0	2.22315	0.701	0.155	0	CD14M_1	PGD
0	1.9445	0.754	0.21	0	CD14M_1	CTSB
0	2.76511	0.614	0.071	0	CD14M_1	PLBD1
0	1.90291	0.89	0.351	0	CD14M_1	TALDO1
0	2.22018	0.657	0.119	0	CD14M_1	FOS
0	2.21073	0.679	0.147	0	CD14M_1	CAPG
0	1.52862	0.838	0.31	0	CD14M_1	MYO1F
0	1.30788	0.896	0.369	0	CD14M_1	SAT1
0	1.68944	0.829	0.304	0	CD14M_1	STXBP2
0	1.55216	0.816	0.294	0	CD14M_1	NPC2
0	1.23185	0.807	0.288	0	CD14M_1	AOAH
0	1.62188	0.846	0.327	0	CD14M_1	ANXA2
0	-5.39068	0.04	0.558	0	CD14M_1	PCED1B-AS1
0	2.05164	0.62	0.104	0	CD14M_1	SLC8A1
0	1.8492	0.703	0.187	0	CD14M_1	BRI3
0	1.7687	0.988	0.473	0	CD14M_1	PSAP
0	2.38115	0.599	0.084	0	CD14M_1	PRAM1
0	1.82743	0.693	0.178	0	CD14M_1	PTPRE
0	2.46282	0.593	0.081	0	CD14M_1	RBM47
0	-4.04688	0.091	0.603	0	CD14M_1	EVL
0	2.6887	0.574	0.068	0	CD14M_1	ALDH2
0	1.55316	0.788	0.283	0	CD14M_1	ANXA5
0	1.71828	0.666	0.161	0	CD14M_1	SYK
0	-4.16513	0.084	0.587	0	CD14M_1	IL2RG
0	2.28451	0.589	0.087	0	CD14M_1	IRAK3
0	2.15426	0.624	0.124	0	CD14M_1	MEGF9
0	2.02239	0.644	0.144	0	CD14M_1	CTSH
0	0.883468	0.749	0.254	0	CD14M_1	HLA-DRB5
0	1.71545	0.712	0.217	0	CD14M_1	VMP1
0	1.44961	0.902	0.408	0	CD14M_1	NEAT1
0	2.01564	0.593	0.1	0	CD14M_1	PILRA
0	2.62958	0.557	0.065	0	CD14M_1	CDA
0	2.20976	0.583	0.093	0	CD14M_1	IGSF6
0	1.47729	0.979	0.491	0	CD14M_1	COTL1
0	1.89319	0.641	0.153	0	CD14M_1	PLCB1
0	2.09817	0.595	0.108	0	CD14M_1	CPPED1
0	1.54556	0.91	0.424	0	CD14M_1	DPYD
0	-5.23375	0.108	0.593	0	CD14M_1	LTB
0	1.6087	0.82	0.338	0	CD14M_1	CTSD
0	1.47862	0.702	0.221	0	CD14M_1	LYST
0	2.3824	0.56	0.08	0	CD14M_1	CLEC12A
0	2.25152	0.565	0.086	0	CD14M_1	LRRK2
0	2.74541	0.539	0.061	0	CD14M_1	KCTD12
0	2.61194	0.551	0.074	0	CD14M_1	TMEM176B
0	1.94813	0.977	0.501	0	CD14M_1	TSPO
0	2.15839	0.559	0.087	0	CD14M_1	DMXL2
0	2.52842	0.532	0.062	0	CD14M_1	RBP7
0	2.22991	0.563	0.093	0	CD14M_1	GAS7
0	1.88571	0.564	0.094	0	CD14M_1	LILRB2
0	1.44793	0.809	0.343	0	CD14M_1	GNAI2
0	1.91798	0.585	0.119	0	CD14M_1	ZSWIM6
0	1.51323	0.695	0.229	0	CD14M_1	PICALM
0	1.55918	0.685	0.221	0	CD14M_1	ASAH1
0	1.6661	0.661	0.198	0	CD14M_1	AGTRAP
0	1.73701	0.656	0.194	0	CD14M_1	IL17RA
0	2.39649	0.541	0.08	0	CD14M_1	SLC7A7
0	-7.07565	0.007	0.467	0	CD14M_1	LCK
0	2.03069	0.582	0.122	0	CD14M_1	CTSZ
0	2.13017	0.541	0.084	0	CD14M_1	LILRA5
0	1.59517	0.961	0.505	0	CD14M_1	GSTP1
0	-6.40446	0.012	0.467	0	CD14M_1	TRBC2
0	-7.13621	0.01	0.465	0	CD14M_1	CD3D
0	-6.46633	0.026	0.48	0	CD14M_1	IL7R
0	1.72003	0.58	0.127	0	CD14M_1	MARCH1
0	2.09339	0.557	0.106	0	CD14M_1	LY86
0	-6.60494	0.012	0.463	0	CD14M_1	CD247
0	-6.31653	0.021	0.472	0	CD14M_1	CD7
0	1.34496	0.701	0.252	0	CD14M_1	TNFRSF1B
0	-3.60667	0.114	0.56	0	CD14M_1	C12orf57
0	1.53286	0.66	0.215	0	CD14M_1	C4orf48
0	2.582	0.51	0.065	0	CD14M_1	TGFBI
0	1.31947	0.84	0.396	0	CD14M_1	RAC1
0	1.37943	0.82	0.377	0	CD14M_1	VSIR
0	2.35736	0.519	0.077	0	CD14M_1	C19orf38
0	1.7942	0.619	0.179	0	CD14M_1	CRTAP
0	-5.81538	0.014	0.45	0	CD14M_1	SKAP1
0	1.33456	0.745	0.31	0	CD14M_1	AP2S1
0	1.7848	0.573	0.139	0	CD14M_1	QKI
0	1.81636	0.582	0.148	0	CD14M_1	NUP214
0	1.79347	0.568	0.135	0	CD14M_1	ATG7
0	2.01897	0.535	0.108	0	CD14M_1	GCA
0	1.41874	0.735	0.308	0	CD14M_1	ATP6V0B
0	-5.19694	0.027	0.454	0	CD14M_1	ETS1
0	1.48183	0.607	0.183	0	CD14M_1	CUX1
0	2.01349	0.511	0.09	0	CD14M_1	RGS2
0	1.20917	0.57	0.149	0	CD14M_1	MEF2C
0	1.66358	0.58	0.16	0	CD14M_1	NUMB
0	2.68263	0.471	0.052	0	CD14M_1	ASGR1
0	2.4278	0.484	0.066	0	CD14M_1	NAIP
0	2.2237	0.503	0.086	0	CD14M_1	CCDC88A
0	1.41555	0.574	0.157	0	CD14M_1	GNAQ
0	1.52006	0.987	0.574	0	CD14M_1	S100A11
0	1.31601	0.763	0.352	0	CD14M_1	TRAPPC5
0	1.63766	0.587	0.177	0	CD14M_1	GRINA
0	1.5638	0.634	0.225	0	CD14M_1	LTA4H
0	1.41774	0.649	0.242	0	CD14M_1	SDCBP
0	1.56662	0.553	0.146	0	CD14M_1	SLCO3A1
0	1.07057	0.693	0.286	0	CD14M_1	TIMP1
0	1.31388	0.758	0.352	0	CD14M_1	SERPINB1
0	1.92291	0.49	0.084	0	CD14M_1	GAB2
0	1.62483	0.582	0.178	0	CD14M_1	ADA2
0	1.84585	0.528	0.125	0	CD14M_1	RAB11FIP1
0	1.23199	0.606	0.203	0	CD14M_1	MED13L
0	1.27508	0.57	0.167	0	CD14M_1	PECAM1
0	1.27944	0.707	0.305	0	CD14M_1	CNPY3
0	1.45033	0.566	0.165	0	CD14M_1	ETV6
0	2.33965	0.469	0.07	0	CD14M_1	TNFSF13
0	1.71248	0.513	0.115	0	CD14M_1	DENND1A
0	1.6771	0.537	0.14	0	CD14M_1	SNX10
0	1.44536	0.63	0.234	0	CD14M_1	FBXL5
0	1.51313	0.54	0.147	0	CD14M_1	BACH1
0	1.20037	0.727	0.334	0	CD14M_1	PGLS
0	2.19382	0.462	0.07	0	CD14M_1	TLR2
0	1.17113	0.862	0.471	0	CD14M_1	ATP6V0C
0	1.16914	0.738	0.347	0	CD14M_1	GRB2
0	1.11785	0.876	0.486	0	CD14M_1	AHNAK
0	1.31824	0.653	0.264	0	CD14M_1	H2AFY
0	-6.7954	0.007	0.395	0	CD14M_1	FCMR
0	2.39697	0.451	0.064	0	CD14M_1	ZNF385A
0	2.29688	0.453	0.066	0	CD14M_1	LILRB3
0	2.2072	0.458	0.072	0	CD14M_1	EMILIN2
0	1.23715	0.601	0.217	0	CD14M_1	SIK3
0	1.21113	0.557	0.175	0	CD14M_1	HLA-DMA
0	1.56271	0.532	0.15	0	CD14M_1	IFNGR2
0	2.00118	0.461	0.08	0	CD14M_1	MAML3
0	2.65042	0.434	0.054	0	CD14M_1	TMEM176A
0	1.86083	0.477	0.097	0	CD14M_1	TRPS1
0	-5.25737	0.022	0.402	0	CD14M_1	LIME1
0	1.03617	0.845	0.467	0	CD14M_1	SAMHD1
0	1.59211	0.545	0.168	0	CD14M_1	RILPL2
0	1.34689	0.568	0.191	0	CD14M_1	SPIDR
0	-6.08427	0.013	0.389	0	CD14M_1	CD2
0	0.363007	0.741	0.366	0	CD14M_1	HLA-DPA1
0	1.12405	0.757	0.382	0	CD14M_1	ZYX
0	1.48903	0.53	0.155	0	CD14M_1	DIAPH2
0	1.29353	0.578	0.203	0	CD14M_1	AGTPBP1
0	1.56651	0.511	0.137	0	CD14M_1	SBF2
0	3.06711	0.404	0.031	0	CD14M_1	MGST1
0	1.41372	0.577	0.204	0	CD14M_1	ATP6V0D1
0	1.21974	0.632	0.26	0	CD14M_1	GLIPR1
0	1.4489	0.546	0.175	0	CD14M_1	MYO9B
0	-6.71866	0.008	0.378	0	CD14M_1	LINC00861
0	0.89122	0.94	0.57	0	CD14M_1	SRGN
0	1.86483	0.469	0.099	0	CD14M_1	PAK1
0	1.94742	0.447	0.078	0	CD14M_1	MCTP1
0	2.18608	0.435	0.066	0	CD14M_1	LILRA2
0	1.36383	0.568	0.199	0	CD14M_1	GLIPR2
0	2.1491	0.439	0.071	0	CD14M_1	PLAUR
0	1.05283	0.744	0.377	0	CD14M_1	ACAP2
0	2.53006	0.413	0.047	0	CD14M_1	CD93
0	2.11121	0.437	0.073	0	CD14M_1	EVI5
0	1.31122	0.576	0.212	0	CD14M_1	TCIRG1
0	0.979749	0.718	0.354	0	CD14M_1	IQGAP1
0	0.978907	0.753	0.39	0	CD14M_1	USP15
0	1.04445	0.695	0.332	0	CD14M_1	CARD16
0	1.27033	0.569	0.207	0	CD14M_1	POU2F2
0	-2.63362	0.351	0.712	0	CD14M_1	KLF2
0	1.73547	0.462	0.102	0	CD14M_1	ALOX5
0	1.60184	0.511	0.151	0	CD14M_1	RTN3
0	-6.49894	0.008	0.368	0	CD14M_1	CD3G
0	0.74798	0.571	0.212	0	CD14M_1	HLA-DQB1
0	1.52963	0.517	0.158	0	CD14M_1	GRK2
0	1.58414	0.532	0.175	0	CD14M_1	COMT
0	1.0543	0.722	0.365	0	CD14M_1	ARRB2
0	2.39563	0.412	0.055	0	CD14M_1	TIMP2
0	1.68424	0.483	0.128	0	CD14M_1	SPTLC2
0	2.1406	0.42	0.065	0	CD14M_1	SULF2
0	2.36751	0.412	0.058	0	CD14M_1	PID1
0	2.38667	0.406	0.053	0	CD14M_1	RAB32
0	1.41403	0.529	0.176	0	CD14M_1	ZNF106
0	2.44562	0.401	0.049	0	CD14M_1	KIF13A
0	1.17679	0.67	0.318	0	CD14M_1	LAMTOR1
0	1.70676	0.452	0.1	0	CD14M_1	FAM49A
0	1.09122	0.572	0.22	0	CD14M_1	MAP3K1
0	-3.63874	0.063	0.415	0	CD14M_1	ISG20
0	1.53455	0.483	0.131	0	CD14M_1	CMIP
0	1.48082	0.489	0.138	0	CD14M_1	NOTCH2
0	1.14435	0.627	0.277	0	CD14M_1	GLRX
0	-7.68135	0.003	0.353	0	CD14M_1	PTPRCAP
0	0.952984	0.751	0.402	0	CD14M_1	DOCK8
0	1.87001	0.433	0.084	0	CD14M_1	DUSP6
0	1.8323	0.433	0.085	0	CD14M_1	GRK3
0	2.41826	0.401	0.054	0	CD14M_1	HK3
0	1.22777	0.522	0.175	0	CD14M_1	SIPA1L1
0	1.6244	0.434	0.087	0	CD14M_1	ARHGAP24
0	-3.40738	0.085	0.432	0	CD14M_1	GIMAP5
0	0.768693	0.703	0.356	0	CD14M_1	PRKCB
0	1.20166	0.83	0.483	0	CD14M_1	ALDOA
0	2.58765	0.39	0.044	0	CD14M_1	PTAFR
0	1.57459	0.483	0.137	0	CD14M_1	THEMIS2
0	2.13351	0.409	0.064	0	CD14M_1	FCGR2A
0	0.923967	0.768	0.424	0	CD14M_1	CAST
0	2.57811	0.39	0.047	0	CD14M_1	CD33
0	2.57605	0.391	0.048	0	CD14M_1	OSCAR
0	1.03289	0.606	0.263	0	CD14M_1	USP3
0	1.31621	0.554	0.212	0	CD14M_1	GSTO1
0	2.47037	0.391	0.049	0	CD14M_1	CSF2RA
0	1.66029	0.477	0.135	0	CD14M_1	NAGK
0	1.79406	0.442	0.1	0	CD14M_1	MAP3K3
0	1.88259	0.44	0.098	0	CD14M_1	RASSF2
0	2.5483	0.383	0.042	0	CD14M_1	AC020656.1
0	2.16107	0.409	0.068	0	CD14M_1	RXRA
0	1.61422	0.454	0.114	0	CD14M_1	TET2
0	1.30653	0.533	0.193	0	CD14M_1	HIF1A
0	1.4678	0.484	0.144	0	CD14M_1	ASAP1
0	1.00973	0.687	0.348	0	CD14M_1	FKBP1A
0	0.958333	0.756	0.417	0	CD14M_1	PRELID1
0	2.08538	0.408	0.069	0	CD14M_1	CD86
0	0.885985	0.619	0.28	0	CD14M_1	DOCK2
0	1.13022	0.819	0.48	0	CD14M_1	PKM
0	0.900252	0.664	0.326	0	CD14M_1	C1orf162
0	2.37481	0.391	0.053	0	CD14M_1	CLEC4A
0	1.02633	0.681	0.345	0	CD14M_1	EVI2B
0	1.24985	0.498	0.162	0	CD14M_1	JARID2
0	0.949297	0.579	0.243	0	CD14M_1	ZFAND3
0	1.46144	0.465	0.131	0	CD14M_1	CCNY
0	-6.89593	0.005	0.339	0	CD14M_1	SPOCK2
0	1.33446	0.475	0.141	0	CD14M_1	FNDC3B
0	0.363304	0.701	0.367	0	CD14M_1	HLA-DPB1
0	1.51496	0.476	0.142	0	CD14M_1	LGALS9
0	0.884413	0.675	0.343	0	CD14M_1	TLN1
0	0.912303	0.828	0.496	0	CD14M_1	LAMTOR4
0	0.679078	0.753	0.422	0	CD14M_1	FLNA
0	1.70508	0.425	0.094	0	CD14M_1	FRY
0	1.08971	0.558	0.228	0	CD14M_1	CEBPB
0	1.61269	0.467	0.137	0	CD14M_1	PLEC
0	-6.30395	0.008	0.338	0	CD14M_1	BCL11B
0	2.38175	0.384	0.054	0	CD14M_1	AL034397.3
0	2.1085	0.407	0.077	0	CD14M_1	SULT1A1
0	1.08805	0.882	0.552	0	CD14M_1	EIF4A1
0	0.770848	0.711	0.381	0	CD14M_1	SSH2
0	-7.66625	0.008	0.335	0	CD14M_1	CTSW
0	0.971755	0.682	0.356	0	CD14M_1	LPP
0	2.5121	0.365	0.039	0	CD14M_1	CREB5
0	-7.55643	0.004	0.33	0	CD14M_1	GZMM
0	1.36817	0.5	0.174	0	CD14M_1	CAPNS1
0	0.882538	0.84	0.514	0	CD14M_1	LRRFIP1
0	-7.39289	0.003	0.328	0	CD14M_1	ZAP70
0	0.608941	0.589	0.264	0	CD14M_1	EFHD2
0	1.32869	0.5	0.176	0	CD14M_1	PPT1
0	1.58539	0.457	0.134	0	CD14M_1	UBXN11
0	-5.83218	0.012	0.335	0	CD14M_1	TCF7
0	1.92598	0.41	0.087	0	CD14M_1	EIF4EBP1
0	1.37639	0.47	0.148	0	CD14M_1	DLEU2
0	0.724257	0.832	0.511	0	CD14M_1	ANXA1
0	1.65796	0.466	0.146	0	CD14M_1	MYADM
0	2.03994	0.39	0.07	0	CD14M_1	KYNU
0	1.26111	0.403	0.083	0	CD14M_1	MS4A7
0	2.12873	0.381	0.061	0	CD14M_1	CD300E
0	0.875871	0.705	0.385	0	CD14M_1	RHOG
0	1.22787	0.524	0.205	0	CD14M_1	BNIP3L
0	2.13294	0.378	0.059	0	CD14M_1	ENTPD1
0	1.60164	0.421	0.102	0	CD14M_1	ITGAM
0	-2.29234	0.299	0.618	0	CD14M_1	TLE5
0	1.32423	0.532	0.214	0	CD14M_1	METTL9
0	0.935673	0.564	0.246	0	CD14M_1	KMT2C
0	1.79088	0.403	0.086	0	CD14M_1	STX11
0	2.17306	0.376	0.059	0	CD14M_1	RNASE6
0	0.892448	0.64	0.323	0	CD14M_1	CKLF
0	-4.39441	0.03	0.347	0	CD14M_1	LAT
0	1.20395	0.521	0.205	0	CD14M_1	SOD2
0	1.46927	0.443	0.127	0	CD14M_1	SKAP2
0	2.5803	0.356	0.04	0	CD14M_1	SIRPB2
0	1.668	0.415	0.099	0	CD14M_1	BAZ2B
0	-6.05386	0.008	0.323	0	CD14M_1	LBH
0	1.38564	0.431	0.116	0	CD14M_1	UBE2E2
0	1.82121	0.387	0.072	0	CD14M_1	DOCK5
0	0.82157	0.801	0.487	0	CD14M_1	CD44
0	1.84569	0.403	0.089	0	CD14M_1	EHBP1L1
0	-6.36891	0.007	0.321	0	CD14M_1	RHOH
0	-6.30585	0.011	0.325	0	CD14M_1	LEF1
0	1.00071	0.522	0.209	0	CD14M_1	COP1
0	1.93677	0.395	0.082	0	CD14M_1	TTC7A
0	0.89298	0.635	0.324	0	CD14M_1	RNF149
0	2.08616	0.379	0.068	0	CD14M_1	RASSF4
0	1.3788	0.489	0.178	0	CD14M_1	MAN2B1
0	1.71397	0.411	0.1	0	CD14M_1	C9orf72
0	1.20242	0.482	0.171	0	CD14M_1	PTEN
0	1.13721	0.518	0.208	0	CD14M_1	PARVG
0	0.987832	0.649	0.339	0	CD14M_1	ATP6V1F
0	1.11408	0.655	0.346	0	CD14M_1	RASGEF1B
0	-6.46363	0.007	0.316	0	CD14M_1	CD96
0	0.849682	0.698	0.389	0	CD14M_1	BLOC1S1
0	0.779753	0.764	0.456	0	CD14M_1	GNG5
0	1.43564	0.448	0.14	0	CD14M_1	ATG16L2
0	0.949122	0.631	0.323	0	CD14M_1	SEC11A
0	1.0565	0.526	0.219	0	CD14M_1	DUSP1
0	0.922984	0.534	0.227	0	CD14M_1	CHST11
0	1.63828	0.421	0.114	0	CD14M_1	PLEKHO1
0	-5.67928	0.011	0.318	0	CD14M_1	SYNE2
0	-6.83884	0.007	0.314	0	CD14M_1	CCR7
0	2.13333	0.362	0.056	0	CD14M_1	FGD4
0	2.79321	0.337	0.032	0	CD14M_1	BST1
0	1.17561	0.468	0.163	0	CD14M_1	GPCPD1
0	-2.61175	0.126	0.431	0	CD14M_1	TBC1D10C
0	1.08067	0.523	0.219	0	CD14M_1	CASP1
0	1.27898	0.466	0.162	0	CD14M_1	HSBP1
0	0.855957	0.763	0.459	0	CD14M_1	VAMP8
0	1.59474	0.416	0.112	0	CD14M_1	ARAP1
0	2.7128	0.334	0.031	0	CD14M_1	LINC00937
0	2.35136	0.347	0.044	0	CD14M_1	WDFY3
0	1.23191	0.501	0.198	0	CD14M_1	NCOA4
0	0.75471	0.728	0.425	0	CD14M_1	AKAP13
0	1.78774	0.398	0.096	0	CD14M_1	NBPF14
0	1.41558	0.413	0.111	0	CD14M_1	HLA-DMB
0	2.06985	0.364	0.063	0	CD14M_1	OGFRL1
0	0.902618	0.73	0.429	0	CD14M_1	ATP5MPL
0	2.12299	0.361	0.06	0	CD14M_1	SLC43A2
0	0.4974	0.57	0.269	0	CD14M_1	PLEK
0	0.989882	0.537	0.237	0	CD14M_1	ATP2B1
0	2.3059	0.355	0.055	0	CD14M_1	TMTC2
0	0.906055	0.907	0.608	0	CD14M_1	ELOB
0	1.3932	0.436	0.137	0	CD14M_1	MANBA
0	1.78582	0.39	0.092	0	CD14M_1	PRKCD
0	1.79134	0.393	0.095	0	CD14M_1	SCPEP1
0	2.2407	0.353	0.055	0	CD14M_1	FES
0	2.51013	0.338	0.041	0	CD14M_1	NFAM1
0	1.90252	0.375	0.078	0	CD14M_1	HRH2
0	1.39528	0.423	0.126	0	CD14M_1	PRKAG2
0	1.45685	0.979	0.682	0	CD14M_1	S100A10
0	1.05984	0.952	0.655	0	CD14M_1	RNASEK
0	1.12582	0.521	0.225	0	CD14M_1	RAB5IF
0	2.46786	0.33	0.035	0	CD14M_1	GLT1D1
0	1.13619	0.465	0.17	0	CD14M_1	MEF2A
0	0.765196	0.717	0.422	0	CD14M_1	MTDH
0	0.750319	0.774	0.48	0	CD14M_1	ARPC5
0	1.66746	0.4	0.106	0	CD14M_1	ATP6V1B2
0	1.46937	0.42	0.126	0	CD14M_1	HIPK3
0	1.80973	0.359	0.065	0	CD14M_1	LRRC25
0	1.86077	0.372	0.079	0	CD14M_1	AGO4
0	0.657861	0.888	0.596	0	CD14M_1	ITGB2
0	1.09018	0.479	0.187	0	CD14M_1	GNB1
0	2.25046	0.345	0.053	0	CD14M_1	PLXNB2
0	-6.88376	0.006	0.297	0	CD14M_1	TRBC1
0	-3.37939	0.077	0.368	0	CD14M_1	PRKCH
0	2.45489	0.328	0.038	0	CD14M_1	PYGL
0	1.39671	0.99	0.7	0	CD14M_1	GABARAP
0	0.796083	0.628	0.338	0	CD14M_1	PLP2
0	-3.51929	0.05	0.339	0	CD14M_1	BIN1
0	2.04663	0.355	0.066	0	CD14M_1	ODF3B
0	0.738967	0.786	0.498	0	CD14M_1	COX8A
0	3.17552	0.313	0.025	0	CD14M_1	STAB1
0	0.764609	0.714	0.426	0	CD14M_1	GNB2
0	0.767066	0.86	0.573	0	CD14M_1	SERP1
0	2.22566	0.335	0.048	0	CD14M_1	TLR4
0	-2.50495	0.126	0.413	0	CD14M_1	SEPTIN1
0	0.834994	0.606	0.319	0	CD14M_1	FMNL1
0	2.49728	0.326	0.04	0	CD14M_1	HNMT
0	0.755092	0.671	0.385	0	CD14M_1	UQCRQ
0	2.63585	0.316	0.03	0	CD14M_1	CLEC4E
0	0.842675	0.788	0.502	0	CD14M_1	GPX4
0	2.18565	0.346	0.06	0	CD14M_1	MSRB1
0	1.66786	0.376	0.091	0	CD14M_1	HDAC9
0	1.20461	0.405	0.12	0	CD14M_1	WARS
0	1.44624	0.408	0.123	0	CD14M_1	WDFY2
0	-6.11306	0.007	0.292	0	CD14M_1	TC2N
0	-3.27671	0.064	0.348	0	CD14M_1	STK17A
0	-6.16617	0.008	0.292	0	CD14M_1	PRKCQ-AS1
0	1.57861	0.382	0.099	0	CD14M_1	ARRB1
0	2.23452	0.339	0.057	0	CD14M_1	CREG1
0	-2.35117	0.151	0.433	0	CD14M_1	GYPC
0	0.902171	0.521	0.239	0	CD14M_1	RIN3
0	1.17761	0.448	0.167	0	CD14M_1	MIS18BP1
0	1.41098	0.416	0.135	0	CD14M_1	TPP1
0	1.24601	0.413	0.132	0	CD14M_1	PHF21A
0	2.33876	0.324	0.044	0	CD14M_1	S100Z
0	1.18092	0.423	0.143	0	CD14M_1	MAP3K5
0	1.29011	0.401	0.122	0	CD14M_1	JAK2
0	-6.11776	0.009	0.288	0	CD14M_1	CAMK4
0	1.06862	0.477	0.198	0	CD14M_1	CD4
0	0.649195	0.704	0.426	0	CD14M_1	ACTR2
0	1.27425	0.417	0.139	0	CD14M_1	UBE2R2
0	2.71004	0.311	0.035	0	CD14M_1	PADI4
0	2.44323	0.321	0.045	0	CD14M_1	ZNF467
0	1.12375	0.418	0.142	0	CD14M_1	PTPRJ
0	-3.60037	0.051	0.327	0	CD14M_1	FLT3LG
0	-3.1075	0.06	0.335	0	CD14M_1	TSTD1
0	-6.30811	0.006	0.281	0	CD14M_1	ITK
0	0.492719	0.891	0.616	0	CD14M_1	CLIC1
0	1.12224	0.474	0.199	0	CD14M_1	CDC42EP3
0	1.01965	0.463	0.189	0	CD14M_1	TNFSF10
0	1.97692	0.343	0.069	0	CD14M_1	LY96
0	1.26263	0.343	0.069	0	CD14M_1	SMIM25
0	0.720885	0.702	0.428	0	CD14M_1	POLR2L
0	2.7607	0.305	0.032	0	CD14M_1	F13A1
0	1.87337	0.328	0.055	0	CD14M_1	NRGN
0	-6.78108	0.004	0.277	0	CD14M_1	CD27
0	0.587325	0.839	0.566	0	CD14M_1	LCP1
0	1.09321	0.422	0.149	0	CD14M_1	SNX29
0	1.03025	0.439	0.166	0	CD14M_1	PREX1
0	2.87221	0.3	0.027	0	CD14M_1	CD163
0	0.834332	0.592	0.319	0	CD14M_1	TMEM219
0	0.939061	0.458	0.186	0	CD14M_1	NCOA1
0	1.0394	0.481	0.209	0	CD14M_1	CSMD1
0	0.74368	0.55	0.278	0	CD14M_1	JMJD1C
0	0.771698	0.613	0.341	0	CD14M_1	NDUFB1
0	1.44741	0.388	0.117	0	CD14M_1	BLVRA
0	0.879184	0.525	0.254	0	CD14M_1	VASP
0	2.64662	0.3	0.03	0	CD14M_1	CYP1B1
0	1.22424	0.392	0.122	0	CD14M_1	PELI1
0	1.47874	0.39	0.12	0	CD14M_1	TOM1
0	1.63838	0.347	0.077	0	CD14M_1	ITGAX
0	1.06071	0.436	0.167	0	CD14M_1	SCLT1
0	2.12343	0.323	0.054	0	CD14M_1	MICAL2
0	0.777688	0.555	0.287	0	CD14M_1	TXN
0	0.715329	0.763	0.495	0	CD14M_1	ENO1
0	1.235	0.399	0.131	0	CD14M_1	MAP3K2
0	1.85851	0.327	0.06	0	CD14M_1	RNF144B
0	0.568685	0.666	0.399	0	CD14M_1	FAM49B
0	1.73682	0.35	0.083	0	CD14M_1	NCF4
0	1.35247	0.395	0.129	0	CD14M_1	GLUL
0	1.00695	0.461	0.195	0	CD14M_1	RAB10
0	2.5393	0.296	0.03	0	CD14M_1	NFE2
0	0.84385	0.557	0.292	0	CD14M_1	CLTA
0	1.6172	0.361	0.096	0	CD14M_1	NADK
0	-5.24945	0.011	0.276	0	CD14M_1	SLC38A1
0	0.887315	0.585	0.32	0	CD14M_1	MCL1
0	0.830706	0.539	0.275	0	CD14M_1	RTN4
0	1.19011	0.411	0.147	0	CD14M_1	IFNGR1
0	1.0331	0.443	0.179	0	CD14M_1	KDM2A
0	1.61877	0.352	0.088	0	CD14M_1	YBX3
0	-4.39142	0.027	0.291	0	CD14M_1	PCED1B
0	0.700968	0.672	0.409	0	CD14M_1	STK17B
0	-8.04544	0.005	0.268	0	CD14M_1	GZMA
0	1.9948	0.317	0.054	0	CD14M_1	CHST15
0	-6.52225	0.031	0.293	0	CD14M_1	CCL5
0	1.70157	0.324	0.062	0	CD14M_1	C5AR1
0	0.616429	0.626	0.365	0	CD14M_1	SMAP2
0	-7.18686	0.011	0.272	0	CD14M_1	CST7
0	-2.04328	0.199	0.46	0	CD14M_1	SEPTIN6
0	1.73323	0.34	0.08	0	CD14M_1	AHR
0	1.45122	0.375	0.115	0	CD14M_1	UBE2D1
0	1.619	0.361	0.101	0	CD14M_1	TMEM205
0	1.55091	0.335	0.076	0	CD14M_1	EXT1
0	1.77311	0.328	0.069	0	CD14M_1	ATP11A
0	0.731566	0.616	0.357	0	CD14M_1	PSMB3
0	0.913993	0.499	0.24	0	CD14M_1	HM13
0	-3.00047	0.074	0.332	0	CD14M_1	ARL4C
0	0.565413	0.77	0.512	0	CD14M_1	TPI1
0	1.66668	0.316	0.059	0	CD14M_1	ACSL1
0	0.635314	0.515	0.258	0	CD14M_1	CD63
0	2.95027	0.289	0.032	0	CD14M_1	CES1
0	2.53046	0.289	0.032	0	CD14M_1	RIN2
0	1.02982	0.461	0.205	0	CD14M_1	MGAT1
0	1.27036	0.4	0.144	0	CD14M_1	NINJ1
0	0.728519	0.482	0.226	0	CD14M_1	PAN3
0	1.19205	0.423	0.167	0	CD14M_1	SAT2
0	0.638235	0.577	0.321	0	CD14M_1	MTPN
0	1.0482	0.397	0.142	0	CD14M_1	FBXW7
0	0.873649	0.401	0.146	0	CD14M_1	ARL15
0	1.84091	0.328	0.073	0	CD14M_1	LACTB
0	0.696699	0.596	0.341	0	CD14M_1	PAK2
0	-5.53658	0.014	0.268	0	CD14M_1	INPP4B
0	0.771257	0.477	0.224	0	CD14M_1	SNX2
0	0.932534	0.473	0.22	0	CD14M_1	CAPZA2
0	2.58166	0.28	0.027	0	CD14M_1	NLRP12
0	1.02756	0.429	0.177	0	CD14M_1	HACD4
0	2.27105	0.297	0.045	0	CD14M_1	ZFHX3
0	0.641985	0.822	0.571	0	CD14M_1	COX5B
0	1.46193	0.349	0.098	0	CD14M_1	PLSCR1
0	1.19369	0.392	0.141	0	CD14M_1	HOOK3
0	1.3044	0.36	0.109	0	CD14M_1	MPP7
0	1.35579	0.358	0.107	0	CD14M_1	FAR1
0	1.28337	0.343	0.092	0	CD14M_1	LILRB1
0	1.08085	0.4	0.15	0	CD14M_1	RAB27A
0	2.11421	0.302	0.052	0	CD14M_1	KIAA0930
0	2.39692	0.285	0.035	0	CD14M_1	TMEM170B
0	0.823221	0.543	0.294	0	CD14M_1	RNH1
0	1.03159	0.394	0.145	0	CD14M_1	PKN2
0	2.38106	0.287	0.038	0	CD14M_1	SMARCD3
0	1.17963	0.389	0.141	0	CD14M_1	RBPJ
0	-2.78644	0.089	0.337	0	CD14M_1	CLEC2D
0	1.07218	0.379	0.131	0	CD14M_1	TBL1X
0	1.06423	0.418	0.17	0	CD14M_1	YWHAE
0	-2.76929	0.077	0.324	0	CD14M_1	CYFIP2
0	1.75364	0.315	0.068	0	CD14M_1	TNRC18
0	-1.92173	0.257	0.504	0	CD14M_1	PLAAT4
0	2.23155	0.29	0.043	0	CD14M_1	CD300LF
0	1.18317	0.459	0.213	0	CD14M_1	SLC26A3
0	2.52539	0.278	0.032	0	CD14M_1	CLMN
0	2.5524	0.277	0.031	0	CD14M_1	SIRPA
0	1.24035	0.353	0.107	0	CD14M_1	LAT2
0	1.94854	0.304	0.058	0	CD14M_1	DPYSL2
0	0.547377	0.615	0.369	0	CD14M_1	SH3KBP1
0	0.924515	0.45	0.205	0	CD14M_1	CCDC69
0	1.1319	0.398	0.153	0	CD14M_1	ZFAND5
0	1.39967	0.36	0.115	0	CD14M_1	HEXB
0	1.79954	0.311	0.066	0	CD14M_1	CTNNA1
0	-6.46589	0.004	0.248	0	CD14M_1	S1PR1
0	1.97671	0.301	0.057	0	CD14M_1	SMCO4
0	1.08129	0.383	0.139	0	CD14M_1	ZDHHC20
0	0.901574	0.959	0.716	0	CD14M_1	ARPC1B
0	0.925152	0.435	0.192	0	CD14M_1	PTK2B
0	2.03217	0.293	0.05	0	CD14M_1	CPNE8
0	1.61862	0.325	0.082	0	CD14M_1	GNS
0	0.750053	0.431	0.189	0	CD14M_1	PPP3CA
0	0.600669	0.595	0.353	0	CD14M_1	DEK
0	1.25207	0.366	0.124	0	CD14M_1	FAM120A
0	2.012	0.293	0.051	0	CD14M_1	NACC2
0	1.34867	0.375	0.133	0	CD14M_1	C20orf27
0	1.17574	0.411	0.169	0	CD14M_1	PLD3
0	0.750148	0.539	0.298	0	CD14M_1	NOP10
0	0.531561	0.657	0.416	0	CD14M_1	CSTB
0	0.899651	0.432	0.191	0	CD14M_1	RNF13
0	1.539	0.304	0.063	0	CD14M_1	CSF1R
0	-7.66432	0.007	0.248	0	CD14M_1	PRF1
0	1.4322	0.354	0.113	0	CD14M_1	ANKRD13D
0	1.11128	0.421	0.18	0	CD14M_1	STX10
0	1.32453	0.342	0.102	0	CD14M_1	PSEN1
0	1.14074	0.354	0.114	0	CD14M_1	NAMPT
0	2.17423	0.281	0.042	0	CD14M_1	RTN1
0	1.13685	0.359	0.12	0	CD14M_1	EIF4G3
0	1.26901	0.365	0.126	0	CD14M_1	TMEM167A
0	-5.73874	0.011	0.25	0	CD14M_1	BACH2
0	1.31604	0.349	0.11	0	CD14M_1	MICU1
0	0.624623	0.568	0.329	0	CD14M_1	WASF2
0	0.755575	0.497	0.259	0	CD14M_1	STMP1
0	0.956667	0.422	0.184	0	CD14M_1	CELF1
0	-2.20937	0.366	0.604	0	CD14M_1	LDHB
0	1.74529	0.296	0.058	0	CD14M_1	ADGRE2
0	-3.32452	0.054	0.292	0	CD14M_1	PIK3IP1
0	0.671785	0.519	0.282	0	CD14M_1	ROCK1
0	2.33872	0.276	0.039	0	CD14M_1	DOK3
0	0.781663	0.406	0.169	0	CD14M_1	FCHSD2
0	2.23522	0.278	0.041	0	CD14M_1	SIRPB1
0	1.21488	0.999	0.762	0	CD14M_1	S100A4
0	0.498914	0.996	0.759	0	CD14M_1	CD74
0	1.79183	0.307	0.07	0	CD14M_1	MBOAT7
0	0.885779	0.452	0.216	0	CD14M_1	NAAA
0	1.05711	0.399	0.163	0	CD14M_1	CTSA
0	-6.51114	0.005	0.241	0	CD14M_1	MAL
0	0.86614	0.481	0.245	0	CD14M_1	UQCRC1
0	1.12262	0.37	0.134	0	CD14M_1	SGK3
0	1.19566	0.359	0.123	0	CD14M_1	CSGALNACT2
0	1.54856	0.323	0.088	0	CD14M_1	SLC16A3
0	-4.44119	0.031	0.266	0	CD14M_1	BCL2
0	-5.8158	0.008	0.243	0	CD14M_1	RORA
0	1.0572	0.408	0.173	0	CD14M_1	SPG21
0	1.32414	0.351	0.116	0	CD14M_1	PTTG1IP
0	1.10626	0.372	0.137	0	CD14M_1	BID
0	0.564236	0.658	0.424	0	CD14M_1	WDR83OS
0	1.0768	0.38	0.146	0	CD14M_1	NT5C2
0	1.69239	0.312	0.078	0	CD14M_1	NUDT16
0	-6.54199	0.004	0.238	0	CD14M_1	CD6
0	1.70935	0.303	0.069	0	CD14M_1	APOBR
0	0.599632	0.876	0.642	0	CD14M_1	UQCR11
0	0.537902	0.72	0.486	0	CD14M_1	NDUFA11
0	2.45836	0.261	0.028	0	CD14M_1	CYP27A1
0	1.15137	0.349	0.116	0	CD14M_1	MAPK14
0	1.54796	0.31	0.077	0	CD14M_1	DENND5A
0	0.490212	0.56	0.328	0	CD14M_1	IQGAP2
0	0.684733	0.531	0.299	0	CD14M_1	ANAPC11
0	0.583091	0.512	0.28	0	CD14M_1	CD55
0	1.30668	0.351	0.119	0	CD14M_1	MFSD1
0	0.754296	0.413	0.181	0	CD14M_1	NCOA2
0	1.68991	0.307	0.075	0	CD14M_1	KLF10
0	1.27193	0.344	0.112	0	CD14M_1	DENND10
0	-6.72005	0.004	0.236	0	CD14M_1	ITM2A
0	0.668296	0.517	0.286	0	CD14M_1	CANX
0	1.16113	0.357	0.126	0	CD14M_1	LPGAT1
0	0.957255	0.425	0.194	0	CD14M_1	POLE4
0	0.940493	0.424	0.193	0	CD14M_1	ATG3
0	1.27076	0.351	0.12	0	CD14M_1	HEBP2
0	1.51404	0.296	0.065	0	CD14M_1	PELI2
0	1.44526	0.313	0.082	0	CD14M_1	MTMR3
0	2.08312	0.278	0.048	0	CD14M_1	FRMD4B
0	1.3042	0.337	0.107	0	CD14M_1	SH3BP2
0	-5.29839	0.01	0.24	0	CD14M_1	OCIAD2
0	0.608411	0.628	0.398	0	CD14M_1	ARF5
0	1.84223	0.291	0.061	0	CD14M_1	CHP1
0	0.606166	0.617	0.387	0	CD14M_1	COX5A
0	1.44279	0.326	0.097	0	CD14M_1	SNX27
0	0.785368	0.396	0.167	0	CD14M_1	ATXN1
0	-5.93621	0.006	0.235	0	CD14M_1	STAT4
0	1.72779	0.286	0.057	0	CD14M_1	BMP2K
0	0.639744	0.505	0.276	0	CD14M_1	PIAS1
0	1.62104	0.309	0.08	0	CD14M_1	PDXK
0	0.473681	0.641	0.413	0	CD14M_1	TCF25
0	2.5573	0.258	0.03	0	CD14M_1	KCNE3
0	-2.03812	0.153	0.381	0	CD14M_1	ACAP1
0	1.84357	0.286	0.058	0	CD14M_1	RNF24
0	1.41462	0.292	0.064	0	CD14M_1	HMOX1
0	-6.05271	0.006	0.233	0	CD14M_1	AC243960.1
0	2.46751	0.259	0.032	0	CD14M_1	IL13RA1
0	1.75852	0.285	0.058	0	CD14M_1	TET3
0	0.508954	0.78	0.553	0	CD14M_1	HIGD2A
0	1.82055	0.288	0.061	0	CD14M_1	MPP1
0	0.870005	0.401	0.175	0	CD14M_1	RASSF3
0	2.45945	0.26	0.034	0	CD14M_1	CD1D
0	2.42348	0.253	0.027	0	CD14M_1	TREM1
0	0.993704	0.407	0.181	0	CD14M_1	LAMTOR2
0	0.660585	0.825	0.599	0	CD14M_1	CALM2
0	1.60494	0.308	0.082	0	CD14M_1	ZDHHC7
0	0.749088	0.498	0.272	0	CD14M_1	NAA38
0	0.594276	0.576	0.35	0	CD14M_1	SCAND1
0	1.30184	0.337	0.112	0	CD14M_1	PLCB2
0	-6.22664	0.005	0.23	0	CD14M_1	CD69
0	1.03167	0.369	0.144	0	CD14M_1	CLTC
0	1.59668	0.303	0.078	0	CD14M_1	ATP6V1A
0	1.35214	0.315	0.091	0	CD14M_1	USP32
0	1.22576	0.344	0.12	0	CD14M_1	LRRFIP2
0	1.73738	0.291	0.067	0	CD14M_1	OSBPL11
0	1.44775	0.306	0.082	0	CD14M_1	RCOR1
0	0.496105	0.734	0.51	0	CD14M_1	PSMA7
0	0.522202	0.683	0.46	0	CD14M_1	ATP5MF
0	1.94364	0.272	0.049	0	CD14M_1	SPECC1
0	2.21029	0.26	0.037	0	CD14M_1	SLC24A4
0	1.52408	0.303	0.08	0	CD14M_1	CARS2
0	0.485503	0.808	0.586	0	CD14M_1	NME2
0	2.03254	0.273	0.051	0	CD14M_1	CKAP4
0	1.2617	0.315	0.093	0	CD14M_1	DISC1
0	1.03628	0.365	0.143	0	CD14M_1	SERPINB6
0	0.550339	0.861	0.639	0	CD14M_1	COX6B1
0	0.552438	0.578	0.356	0	CD14M_1	GNAS
0	0.587349	0.41	0.188	0	CD14M_1	FTX
0	0.381207	0.654	0.433	0	CD14M_1	RNASET2
0	1.30859	0.336	0.115	0	CD14M_1	EVI2A
0	0.529011	0.628	0.407	0	CD14M_1	ATP5PD
0	2.55682	0.249	0.028	0	CD14M_1	GASK1B
0	0.798447	0.447	0.226	0	CD14M_1	ENY2
0	1.07188	0.371	0.15	0	CD14M_1	TXNDC17
0	1.55531	0.295	0.074	0	CD14M_1	PLXNC1
0	0.802188	0.46	0.24	0	CD14M_1	RNF181
0	0.60621	0.511	0.291	0	CD14M_1	EIF3A
0	1.97522	0.275	0.055	0	CD14M_1	GAA
0	-5.75144	0.007	0.227	0	CD14M_1	ABLIM1
0	2.38573	0.255	0.035	0	CD14M_1	LTBR
0	0.580349	0.727	0.507	0	CD14M_1	UQCRH
0	0.739456	0.481	0.261	0	CD14M_1	FERMT3
0	0.316677	0.616	0.396	0	CD14M_1	PTPN6
0	0.899967	0.392	0.173	0	CD14M_1	PTPN18
0	1.96007	0.266	0.047	0	CD14M_1	SOX4
0	3.08103	0.239	0.02	0	CD14M_1	NRG1
0	0.647937	0.478	0.259	0	CD14M_1	DIAPH1
0	0.478571	0.666	0.448	0	CD14M_1	ATP5ME
0	0.449298	0.659	0.441	0	CD14M_1	SEC61B
0	-2.18282	0.248	0.466	0	CD14M_1	NOSIP
0	0.541623	0.684	0.466	0	CD14M_1	SLC25A5
0	1.9959	0.262	0.045	0	CD14M_1	IRS2
0	0.614244	0.52	0.303	0	CD14M_1	ROMO1
0	1.06612	0.36	0.143	0	CD14M_1	FAM200B
0	1.43056	0.308	0.091	0	CD14M_1	ABR
0	0.414647	0.708	0.491	0	CD14M_1	CDC42
0	0.630014	0.57	0.353	0	CD14M_1	PGAM1
0	1.64325	0.287	0.07	0	CD14M_1	SH2B3
0	0.765393	0.452	0.236	0	CD14M_1	HSD17B11
0	0.842784	0.367	0.151	0	CD14M_1	MAP4K4
0	2.31783	0.252	0.036	0	CD14M_1	RAB3D
0	1.34037	0.319	0.104	0	CD14M_1	RNPEP
0	0.871079	0.389	0.174	0	CD14M_1	ATOX1
0	-1.87764	0.187	0.402	0	CD14M_1	TAGAP
0	1.84516	0.269	0.054	0	CD14M_1	DAPK1
0	1.75936	0.278	0.063	0	CD14M_1	APAF1
0	0.96947	0.39	0.175	0	CD14M_1	PSTPIP1
0	0.518384	0.64	0.425	0	CD14M_1	SH3BGRL
0	2.72593	0.235	0.02	0	CD14M_1	CRISPLD2
0	0.427126	0.615	0.4	0	CD14M_1	PTP4A2
0	0.463243	0.851	0.636	0	CD14M_1	TPM3
0	1.52855	0.285	0.07	0	CD14M_1	MARCKS
0	1.53964	0.297	0.082	0	CD14M_1	FKBP15
0	0.372019	0.589	0.374	0	CD14M_1	TGFB1
0	-1.88043	0.616	0.831	0	CD14M_1	MT-ND4L
0	-5.77421	0.006	0.22	0	CD14M_1	PRKCQ
0	2.93183	0.237	0.023	0	CD14M_1	RETN
0	0.781848	0.958	0.744	0	CD14M_1	ARPC3
0	1.61124	0.279	0.066	0	CD14M_1	RELL1
0	1.13617	0.326	0.113	0	CD14M_1	DICER1
0	0.865328	0.377	0.164	0	CD14M_1	ARID1A
0	-3.97356	0.029	0.242	0	CD14M_1	KLF12
0	0.753477	0.419	0.206	0	CD14M_1	NLRP1
0	1.43843	0.294	0.081	0	CD14M_1	ATP2B1-AS1
0	1.6211	0.279	0.067	0	CD14M_1	ZMIZ1
0	2.43927	0.239	0.027	0	CD14M_1	DYSF
0	1.20732	0.308	0.096	0	CD14M_1	SOS2
0	0.983273	0.362	0.15	0	CD14M_1	JUND
0	1.55042	0.291	0.079	0	CD14M_1	UNC93B1
0	1.17601	0.349	0.137	0	CD14M_1	TRMT1
0	0.430013	0.53	0.319	0	CD14M_1	STK10
0	0.608771	0.543	0.332	0	CD14M_1	SF3B5
0	1.1918	0.314	0.103	0	CD14M_1	KDM7A
0	0.994638	0.334	0.123	0	CD14M_1	ZNF609
0	-6.0644	0.084	0.295	0	CD14M_1	NKG7
0	1.58931	0.289	0.078	0	CD14M_1	SCO2
0	-2.95418	0.061	0.271	0	CD14M_1	DENND2D
0	1.12612	0.325	0.115	0	CD14M_1	CYB5R4
0	1.65282	0.266	0.056	0	CD14M_1	MAFB
0	-5.80317	0.006	0.216	0	CD14M_1	TRAC
0	1.40653	0.29	0.08	0	CD14M_1	TESC
0	1.86972	0.252	0.043	0	CD14M_1	ST6GALNAC3
0	2.30871	0.245	0.036	0	CD14M_1	MAP3K20
0	1.3426	0.308	0.099	0	CD14M_1	NAPRT
0	1.45877	0.289	0.08	0	CD14M_1	AGFG1
0	0.444755	0.579	0.37	0	CD14M_1	SRRM2
0	0.43547	0.721	0.512	0	CD14M_1	NDUFA1
0	0.55691	0.907	0.699	0	CD14M_1	LSP1
0	0.548278	0.454	0.246	0	CD14M_1	INPP5D
0	0.524527	0.551	0.343	0	CD14M_1	GDI2
0	2.44086	0.235	0.027	0	CD14M_1	FCGR1A
0	2.02743	0.25	0.042	0	CD14M_1	TBC1D9
0	2.2527	0.242	0.034	0	CD14M_1	TNS3
0	2.30116	0.237	0.029	0	CD14M_1	ANPEP
0	-4.54171	0.016	0.223	0	CD14M_1	PIM2
0	0.773186	0.35	0.143	0	CD14M_1	JAZF1
0	0.855455	0.358	0.151	0	CD14M_1	CREBBP
0	0.517025	0.891	0.684	0	CD14M_1	RHOA
0	0.537857	0.586	0.379	0	CD14M_1	SQSTM1
0	-2.66981	0.081	0.288	0	CD14M_1	PIM1
0	0.723237	0.471	0.264	0	CD14M_1	TUBA1A
0	1.40999	0.292	0.085	0	CD14M_1	NCOR2
0	0.428849	0.762	0.555	0	CD14M_1	ATP5F1D
0	0.637678	0.47	0.263	0	CD14M_1	XRN2
0	1.02812	0.332	0.126	0	CD14M_1	UBR4
0	-4.51853	0.019	0.225	0	CD14M_1	TXK
0	1.07515	0.323	0.117	0	CD14M_1	CERT1
0	1.07566	0.308	0.102	0	CD14M_1	PTPN12
0	1.55279	0.275	0.069	0	CD14M_1	KCNQ1
0	0.697572	0.416	0.21	0	CD14M_1	CMTM6
0	1.72512	0.26	0.055	0	CD14M_1	RHOQ
0	1.96327	0.251	0.046	0	CD14M_1	AC090559.1
0	2.46043	0.235	0.03	0	CD14M_1	LILRA6
0	0.592251	0.469	0.264	0	CD14M_1	REEP5
0	1.16527	0.989	0.784	0	CD14M_1	OAZ1
0	-1.71538	0.179	0.383	0	CD14M_1	PEBP1
0	1.58018	0.276	0.072	0	CD14M_1	PPP1R9B
0	-6.08858	0.005	0.209	0	CD14M_1	TESPA1
0	0.862194	0.376	0.173	0	CD14M_1	TMEM165
0	0.246794	0.666	0.463	0	CD14M_1	MSN
0	-3.7046	0.032	0.235	0	CD14M_1	OXNAD1
0	-6.54882	0.005	0.208	0	CD14M_1	KLRK1
0	1.72323	1	0.797	0	CD14M_1	S100A6
0	0.531646	0.475	0.272	0	CD14M_1	TGOLN2
0	1.74058	0.248	0.046	0	CD14M_1	RGS18
0	0.456225	0.467	0.265	0	CD14M_1	BIRC6
0	0.821274	0.377	0.175	0	CD14M_1	GTF2I
0	-4.37357	0.017	0.219	0	CD14M_1	OPTN
0	2.36417	0.231	0.029	0	CD14M_1	SHTN1
0	2.06455	0.245	0.043	0	CD14M_1	CORO1C
0	0.634959	0.398	0.196	0	CD14M_1	MAPK1
0	-6.49104	0.003	0.205	0	CD14M_1	SCML4
0	0.645991	0.414	0.212	0	CD14M_1	WAC
0	1.03139	0.348	0.146	0	CD14M_1	H2AFJ
0	2.18393	0.24	0.038	0	CD14M_1	SIGLEC9
0	0.556522	0.503	0.302	0	CD14M_1	CHCHD10
0	0.838442	0.408	0.207	0	CD14M_1	INO80D
0	1.2443	0.297	0.096	0	CD14M_1	MBD2
0	1.42395	0.286	0.085	0	CD14M_1	CCDC88B
0	3.03466	0.215	0.015	0	CD14M_1	QPCT
0	0.898417	0.332	0.132	0	CD14M_1	SUMF1
0	-3.39559	0.044	0.244	0	CD14M_1	MYC
0	1.83081	0.258	0.058	0	CD14M_1	FBP1
0	1.92286	0.249	0.049	0	CD14M_1	MYO15B
0	0.649965	0.486	0.286	0	CD14M_1	NDUFS7
0	0.571424	0.403	0.203	0	CD14M_1	TBC1D22A
0	0.835885	0.985	0.785	0	CD14M_1	CYBA
0	0.477923	0.591	0.391	0	CD14M_1	COPE
0	0.431558	0.543	0.344	0	CD14M_1	ADGRE5
0	0.551736	0.525	0.326	0	CD14M_1	HADHA
0	-7.4849	0.043	0.242	0	CD14M_1	GNLY
0	0.702758	0.339	0.14	0	CD14M_1	CALHM6
0	1.6688	0.259	0.06	0	CD14M_1	ACER3
0	1.15928	0.296	0.097	0	CD14M_1	FOXO3
0	-5.95435	0.006	0.205	0	CD14M_1	THEMIS
0	1.15201	0.309	0.111	0	CD14M_1	IL6R
0	0.939358	0.337	0.139	0	CD14M_1	IQSEC1
0	0.680276	0.465	0.267	0	CD14M_1	HMGB2
0	-7.33111	0.005	0.203	0	CD14M_1	KLRB1
0	0.404513	0.525	0.327	0	CD14M_1	TAOK3
0	0.882827	0.348	0.15	0	CD14M_1	WASHC4
0	-1.6391	0.407	0.604	0	CD14M_1	GIMAP7
0	2.23781	0.233	0.036	0	CD14M_1	SLC15A3
0	1.20247	0.301	0.104	0	CD14M_1	STAT2
0	0.52268	0.527	0.33	0	CD14M_1	ANP32A
0	2.03893	0.246	0.049	0	CD14M_1	ROGDI
0	2.39243	0.227	0.03	0	CD14M_1	RASGRP4
0	0.601697	0.451	0.254	0	CD14M_1	RGS19
0	-2.03367	0.16	0.357	0	CD14M_1	CXCR4
0	1.06259	0.298	0.101	0	CD14M_1	PIK3AP1
0	0.902724	0.357	0.16	0	CD14M_1	MOB3A
0	0.488889	0.557	0.361	0	CD14M_1	COX7B
0	1.19992	0.314	0.118	0	CD14M_1	IMPDH1
0	1.31413	0.276	0.08	0	CD14M_1	SLC25A37
0	0.931167	0.331	0.135	0	CD14M_1	TUT7
0	0.822931	0.326	0.13	0	CD14M_1	ERC1
0	1.47926	0.262	0.066	0	CD14M_1	SCIMP
0	2.67859	0.217	0.021	0	CD14M_1	ASGR2
0	-2.63444	0.069	0.265	0	CD14M_1	SLFN5
0	-5.7803	0.006	0.202	0	CD14M_1	IKZF3
0	0.893676	0.353	0.157	0	CD14M_1	PRKAR1A
0	-1.4735	0.382	0.578	0	CD14M_1	CCND3
0	1.19055	0.993	0.797	0	CD14M_1	VIM
0	0.472165	0.589	0.393	0	CD14M_1	WAS
0	-1.90392	0.37	0.566	0	CD14M_1	MT-ATP8
0	1.03711	0.324	0.129	0	CD14M_1	MAPKAPK3
0	1.5581	0.254	0.059	0	CD14M_1	TRIO
0	0.821436	0.375	0.18	0	CD14M_1	STAT6
0	0.182192	0.487	0.292	0	CD14M_1	LINC01619
0	1.29935	0.272	0.077	0	CD14M_1	SLC39A11
0	-3.70619	0.026	0.221	0	CD14M_1	CDC25B
0	0.761347	0.39	0.195	0	CD14M_1	CHMP4B
0	0.851549	0.364	0.169	0	CD14M_1	IFI27L2
0	0.744079	0.414	0.219	0	CD14M_1	SHKBP1
0	0.582034	0.406	0.212	0	CD14M_1	NIN
0	0.86617	0.374	0.18	0	CD14M_1	AKR1A1
0	-7.96224	0.002	0.196	0	CD14M_1	HOPX
0	0.929633	0.327	0.133	0	CD14M_1	TMEM154
0	0.384031	0.646	0.452	0	CD14M_1	CSNK2B
0	0.837674	0.318	0.124	0	CD14M_1	STX7
0	2.50338	0.219	0.025	0	CD14M_1	TFEC
0	-7.07627	0.003	0.197	0	CD14M_1	AQP3
0	1.0835	0.301	0.107	0	CD14M_1	ANO6
0	-3.06597	0.045	0.239	0	CD14M_1	ITGB7
0	2.23238	0.228	0.034	0	CD14M_1	CYFIP1
0	1.4356	0.278	0.084	0	CD14M_1	TYK2
0	0.631219	0.421	0.227	0	CD14M_1	MOB1A
0	0.607466	0.418	0.224	0	CD14M_1	SETX
0	0.669859	0.4	0.207	0	CD14M_1	NCKAP1L
0	0.708482	0.402	0.209	0	CD14M_1	OS9
0	1.32925	0.273	0.08	0	CD14M_1	ACSL4
0	1.37379	0.282	0.089	0	CD14M_1	NBPF19
0	1.00872	0.35	0.157	0	CD14M_1	PRDX3
0	0.392883	0.831	0.638	0	CD14M_1	RPL23
0	0.66278	0.401	0.209	0	CD14M_1	ERICH1
0	0.35139	0.483	0.291	0	CD14M_1	SORL1
0	1.98656	0.233	0.041	0	CD14M_1	KIAA0513
0	-1.63981	0.241	0.433	0	CD14M_1	SUN2
0	2.38037	0.222	0.031	0	CD14M_1	SEMA4A
0	0.44445	0.489	0.298	0	CD14M_1	MYO1G
0	1.05979	0.325	0.134	0	CD14M_1	SQOR
0	0.880713	0.36	0.169	0	CD14M_1	PTRHD1
0	0.824744	0.36	0.169	0	CD14M_1	EIF4E2
0	0.206316	0.585	0.394	0	CD14M_1	FOXN3
0	0.500542	0.924	0.734	0	CD14M_1	LAPTM5
0	0.752485	0.338	0.148	0	CD14M_1	TRIP12
0	0.733917	0.394	0.204	0	CD14M_1	SSR3
0	0.727872	0.368	0.178	0	CD14M_1	SP3
0	0.44624	0.448	0.258	0	CD14M_1	TBC1D5
0	1.22396	0.269	0.079	0	CD14M_1	CTBP2
0	0.35497	0.531	0.341	0	CD14M_1	MYCBP2
0	1.09004	0.292	0.102	0	CD14M_1	SEC14L1
0	0.89907	0.327	0.138	0	CD14M_1	RAB1A
0	0.983989	0.325	0.136	0	CD14M_1	HDLBP
0	0.716466	0.362	0.173	0	CD14M_1	UBR2
0	1.66606	0.249	0.06	0	CD14M_1	VNN2
0	0.536433	0.377	0.188	0	CD14M_1	IGF2R
0	1.67302	0.247	0.058	0	CD14M_1	CAMKK2
0	0.399884	0.467	0.278	0	CD14M_1	VPS13C
0	1.33363	0.272	0.083	0	CD14M_1	DNAJC5
0	-1.37089	0.269	0.458	0	CD14M_1	HMGN1
0	0.944349	0.314	0.125	0	CD14M_1	MRTFA
0	0.287854	0.847	0.658	0	CD14M_1	RPS17
0	0.862346	0.337	0.149	0	CD14M_1	CAB39
0	0.726096	0.37	0.182	0	CD14M_1	SHOC2
0	2.8481	0.205	0.017	0	CD14M_1	FOLR3
0	0.62111	0.386	0.198	0	CD14M_1	RB1
0	0.943731	0.326	0.138	0	CD14M_1	DPEP2
0	0.628449	0.44	0.252	0	CD14M_1	TMEM256
0	1.50814	0.262	0.074	0	CD14M_1	PLIN3
0	1.13221	0.302	0.114	0	CD14M_1	VMA21
0	0.879812	0.351	0.163	0	CD14M_1	RAB24
0	0.70879	0.399	0.212	0	CD14M_1	CHMP2A
0	0.404681	0.484	0.297	0	CD14M_1	SRPK2
0	0.3979	0.575	0.388	0	CD14M_1	MICOS10
0	0.3857	0.569	0.382	0	CD14M_1	ARPC4
0	-1.4118	0.354	0.54	0	CD14M_1	TRAF3IP3
0	0.654544	0.338	0.152	0	CD14M_1	ITPR2
0	0.888438	0.311	0.125	0	CD14M_1	ATAD2B
0	1.93836	0.231	0.045	0	CD14M_1	SLC31A2
0	2.31132	0.214	0.028	0	CD14M_1	MEFV
0	-1.39186	0.334	0.52	0	CD14M_1	VAMP2
0	0.572542	0.435	0.249	0	CD14M_1	WSB1
0	-1.35282	0.306	0.492	0	CD14M_1	SOD1
0	1.11238	0.284	0.098	0	CD14M_1	MYO5A
0	0.995645	0.315	0.13	0	CD14M_1	IRF2BP2
0	1.35109	0.27	0.085	0	CD14M_1	HEBP1
0	1.85694	0.23	0.045	0	CD14M_1	ARID3A
0	0.687566	0.42	0.235	0	CD14M_1	KDELR1
0	2.42328	0.216	0.031	0	CD14M_1	LILRB4
0	0.626554	0.391	0.207	0	CD14M_1	ELF2
0	0.674981	0.368	0.184	0	CD14M_1	RC3H1
0	0.927393	0.3	0.116	0	CD14M_1	FNIP1
0	1.56494	0.258	0.074	0	CD14M_1	RPS6KA4
0	0.904669	0.383	0.199	0	CD14M_1	SLC2A3
0	0.821771	0.286	0.103	0	CD14M_1	CERS6
0	-3.78351	0.024	0.207	0	CD14M_1	STMN3
0	0.34179	0.689	0.506	0	CD14M_1	NDUFB11
0	0.63051	0.326	0.144	0	CD14M_1	PHACTR2
0	1.23205	0.272	0.09	0	CD14M_1	LAMP2
0	0.29872	0.631	0.449	0	CD14M_1	RCSD1
0	0.516399	0.477	0.295	0	CD14M_1	NDUFA2
0	0.541969	0.381	0.199	0	CD14M_1	R3HDM2
0	1.73036	0.228	0.046	0	CD14M_1	LILRA1
0	1.86241	0.228	0.046	0	CD14M_1	PPM1F
0	0.351162	0.724	0.542	0	CD14M_1	NDUFA13
0	0.420678	0.531	0.35	0	CD14M_1	PRDX5
0	1.8688	0.232	0.051	0	CD14M_1	IRF5
0	1.08668	0.277	0.096	0	CD14M_1	APP
0	0.84894	0.32	0.139	0	CD14M_1	TACC1
0	0.62057	0.374	0.193	0	CD14M_1	TM9SF2
0	1.16961	0.282	0.101	0	CD14M_1	RARA
0	1.69561	0.231	0.051	0	CD14M_1	SRGAP2
0	0.45607	0.394	0.214	0	CD14M_1	ADAM10
0	2.38849	0.206	0.026	0	CD14M_1	SLC22A15
0	0.72657	0.352	0.172	0	CD14M_1	COPA
0	2.07618	0.21	0.03	0	CD14M_1	NLRP3
0	1.23612	0.256	0.076	0	CD14M_1	PIK3CB
0	0.226307	0.434	0.254	0	CD14M_1	ELMO1
0	0.624477	0.426	0.246	0	CD14M_1	PNPLA2
0	1.30733	0.261	0.081	0	CD14M_1	MLXIP
0	1.51344	0.244	0.064	0	CD14M_1	MPST
0	0.621016	0.349	0.169	0	CD14M_1	HELZ
0	0.914444	0.321	0.142	0	CD14M_1	MAP2K1
0	1.23053	0.254	0.075	0	CD14M_1	CDK19
0	-2.00928	0.108	0.287	0	CD14M_1	HSPB1
0	0.604438	0.377	0.198	0	CD14M_1	SND1
0	1.01186	0.291	0.112	0	CD14M_1	CBL
0	0.405152	0.505	0.326	0	CD14M_1	OSBPL8
0	-1.62717	0.226	0.404	0	CD14M_1	LEPROTL1
0	1.31688	0.266	0.088	0	CD14M_1	CARD19
0	-2.5722	0.066	0.244	0	CD14M_1	PBXIP1
0	0.763255	0.314	0.136	0	CD14M_1	FBXO11
0	-5.79922	0.006	0.184	0	CD14M_1	C12orf75
0	0.716408	0.377	0.199	0	CD14M_1	OGFR
0	2.71812	0.195	0.018	0	CD14M_1	ALDH1A1
0	0.724236	0.331	0.154	0	CD14M_1	MARK3
0	1.27326	0.267	0.09	0	CD14M_1	TIAM1
0	0.441356	0.454	0.277	0	CD14M_1	CAPZA1
0	-6.61682	0.003	0.18	0	CD14M_1	PYHIN1
0	1.62879	0.236	0.059	0	CD14M_1	QSOX1
0	1.32323	0.259	0.082	0	CD14M_1	NBEAL2
0	-6.44261	0.003	0.18	0	CD14M_1	SAMD3
0	1.86353	0.219	0.042	0	CD14M_1	STK3
0	1.78227	0.223	0.046	0	CD14M_1	TPCN1
0	2.32127	0.206	0.029	0	CD14M_1	IMPA2
0	1.69905	0.227	0.05	0	CD14M_1	TRIOBP
0	0.62347	0.434	0.257	0	CD14M_1	ATP6AP2
0	1.68234	0.227	0.051	0	CD14M_1	IL15
0	0.897491	0.318	0.142	0	CD14M_1	HK1
0	0.822912	0.339	0.163	0	CD14M_1	CAT
0	0.597386	0.332	0.156	0	CD14M_1	USP25
0	0.392576	0.371	0.195	0	CD14M_1	VPS13B
0	-7.78751	0.005	0.181	0	CD14M_1	GZMB
0	0.694295	0.329	0.154	0	CD14M_1	CPQ
0	1.29469	0.247	0.072	0	CD14M_1	CEP170
0	0.629485	0.351	0.176	0	CD14M_1	TANK
0	0.911679	0.306	0.131	0	CD14M_1	TNFRSF1A
0	1.70285	0.225	0.05	0	CD14M_1	METTL7A
0	0.900835	0.292	0.117	0	CD14M_1	WWP2
0	1.8345	0.219	0.044	0	CD14M_1	C20orf194
0	0.291591	0.866	0.692	0	CD14M_1	YWHAB
0	1.07347	0.267	0.093	0	CD14M_1	WDR26
0	2.37996	0.203	0.029	0	CD14M_1	CCR2
0	0.600368	0.402	0.228	0	CD14M_1	BNIP2
0	1.11772	0.273	0.099	0	CD14M_1	AP1B1
0	0.485965	0.473	0.299	0	CD14M_1	COPS9
0	-6.24235	0.003	0.177	0	CD14M_1	CD5
0	3.49564	0.185	0.011	0	CD14M_1	RNASE2
0	1.06423	0.29	0.116	0	CD14M_1	DHRS4
0	1.43919	0.241	0.067	0	CD14M_1	AP3S2
0	0.927675	0.287	0.113	0	CD14M_1	EP300
0	0.519882	0.548	0.375	0	CD14M_1	NFKBIA
0	1.54756	0.231	0.058	0	CD14M_1	KDM1B
0	1.75761	0.213	0.04	0	CD14M_1	CR1
0	1.0521	0.285	0.112	0	CD14M_1	PLEKHB2
0	-6.13964	0.004	0.177	0	CD14M_1	TRAT1
0	0.427102	0.5	0.327	0	CD14M_1	RAB7A
0	0.111211	0.49	0.317	0	CD14M_1	IFITM3
0	0.918133	0.313	0.14	0	CD14M_1	FLII
0	0.853656	0.298	0.125	0	CD14M_1	TAOK1
0	0.624525	0.355	0.182	0	CD14M_1	TPM4
0	0.201342	0.901	0.729	0	CD14M_1	ARPC2
0	1.13798	0.274	0.102	0	CD14M_1	DSCAM
0	0.48883	0.91	0.738	0	CD14M_1	SLC25A6
0	-1.81434	0.128	0.3	0	CD14M_1	SYTL1
0	0.539838	0.445	0.273	0	CD14M_1	TWF2
0	0.329893	0.445	0.273	0	CD14M_1	ANKRD11
0	0.71192	0.32	0.149	0	CD14M_1	PPP3R1
0	0.811766	0.327	0.156	0	CD14M_1	USP4
0	0.272603	0.389	0.218	0	CD14M_1	ARID1B
0	1.54604	0.221	0.05	0	CD14M_1	SESTD1
0	0.513282	0.364	0.193	0	CD14M_1	UVRAG
0	-7.21414	0.004	0.175	0	CD14M_1	KLRD1
0	1.77114	0.215	0.044	0	CD14M_1	ZNF710
0	1.98172	0.209	0.038	0	CD14M_1	ADAP2
0	1.75712	0.226	0.056	0	CD14M_1	ADAM15
0	1.55066	0.225	0.055	0	CD14M_1	BCL6
0	1.49232	0.237	0.067	0	CD14M_1	AGPAT2
0	0.419499	0.481	0.311	0	CD14M_1	ALKBH7
0	0.991832	0.288	0.118	0	CD14M_1	IL10RB
0	0.589106	0.405	0.236	0	CD14M_1	MRPL52
0	0.654613	0.339	0.17	0	CD14M_1	RIOK3
0	1.20431	0.264	0.095	0	CD14M_1	TSEN34
0	1.89334	0.209	0.04	0	CD14M_1	PHC2
0	-5.89171	0.004	0.173	0	CD14M_1	LY9
0	-2.70734	0.066	0.235	0	CD14M_1	DDIT4
0	1.35278	0.242	0.073	0	CD14M_1	ITPK1
0	0.927216	0.301	0.132	0	CD14M_1	MAP2K3
0	0.516612	0.44	0.271	0	CD14M_1	DDT
0	1.07239	0.28	0.112	0	CD14M_1	JOSD2
0	2.31636	0.195	0.027	0	CD14M_1	SORT1
0	1.70052	0.221	0.053	0	CD14M_1	NBPF10
0	-3.94361	0.02	0.188	0	CD14M_1	TNIK
0	1.02855	0.261	0.093	0	CD14M_1	UBE2W
0	2.37235	0.196	0.028	0	CD14M_1	ALDH3B1
0	0.787727	0.313	0.145	0	CD14M_1	SPG11
0	1.67614	0.222	0.054	0	CD14M_1	COLGALT1
0	1.87846	0.209	0.041	0	CD14M_1	GNB4
0	0.513885	0.354	0.186	0	CD14M_1	ERBIN
0	1.88722	0.211	0.043	0	CD14M_1	PRKACA
0	1.22524	0.242	0.074	0	CD14M_1	AGPAT3
0	-5.51063	0.006	0.174	0	CD14M_1	GRAP2
0	0.566046	0.341	0.174	0	CD14M_1	LIMS1
0	0.459176	0.451	0.284	0	CD14M_1	RAB5C
0	0.457211	0.395	0.228	0	CD14M_1	RBM6
0	-2.36805	0.067	0.234	0	CD14M_1	RHOF
0	1.93255	0.204	0.037	0	CD14M_1	KLF4
0	-2.03666	0.132	0.299	0	CD14M_1	RASA3
0	1.85617	0.204	0.037	0	CD14M_1	ZNF516
0	1.80642	0.215	0.048	0	CD14M_1	NAGA
0	0.469832	0.458	0.292	0	CD14M_1	AURKAIP1
0	0.573637	0.527	0.361	0	CD14M_1	MT2A
0	2.28593	0.195	0.029	0	CD14M_1	P2RY13
0	2.66836	0.185	0.019	0	CD14M_1	SLC2A9
0	0.953237	0.267	0.101	0	CD14M_1	KDM3B
0	1.91445	0.202	0.036	0	CD14M_1	IER3
0	2.52126	0.186	0.02	0	CD14M_1	ARHGEF40
0	0.553138	0.39	0.224	0	CD14M_1	SUPT4H1
0	-1.62398	0.147	0.313	0	CD14M_1	PRDX2
0	-1.5215	0.186	0.352	0	CD14M_1	IL16
0	0.955187	0.3	0.134	0	CD14M_1	ATF4
0	1.46022	0.221	0.056	0	CD14M_1	MXD1
0	-7.86024	0.004	0.169	0	CD14M_1	FGFBP2
0	-1.63621	0.156	0.321	0	CD14M_1	PSIP1
0	-7.84636	0.004	0.169	0	CD14M_1	GZMH
0	1.078	0.219	0.054	0	CD14M_1	APOBEC3A
0	0.485491	0.355	0.19	0	CD14M_1	AP3B1
0	0.393506	0.481	0.316	0	CD14M_1	P4HB
0	2.54433	0.186	0.022	0	CD14M_1	ARHGEF10L
0	-3.07447	0.035	0.199	0	CD14M_1	LDLRAP1
0	1.0424	0.262	0.098	0	CD14M_1	FEZ2
0	2.01403	0.201	0.037	0	CD14M_1	PLXND1
0	1.93055	0.201	0.037	0	CD14M_1	MGST2
0	1.25809	0.23	0.066	0	CD14M_1	RREB1
0	-6.55917	0.002	0.166	0	CD14M_1	GATA3
0	1.19789	0.255	0.091	0	CD14M_1	MAP3K11
0	0.995827	0.256	0.092	0	CD14M_1	ABHD2
0	0.920614	0.282	0.118	0	CD14M_1	CLIP1
0	2.66025	0.181	0.018	0	CD14M_1	SGMS2
0	2.12243	0.195	0.032	0	CD14M_1	LMO2
0	0.499788	0.387	0.224	0	CD14M_1	DNAJC15
0	2.26781	0.188	0.025	0	CD14M_1	LTB4R
0	-1.57708	0.169	0.332	0	CD14M_1	TECR
0	1.70932	0.206	0.043	0	CD14M_1	GPBAR1
0	0.877883	0.294	0.131	0	CD14M_1	LAP3
0	0.427475	0.415	0.252	0	CD14M_1	FKBP5
0	1.04035	0.265	0.103	0	CD14M_1	C6orf62
0	-0.982317	0.363	0.525	0	CD14M_1	LY6E
0	0.600351	0.379	0.217	0	CD14M_1	LRPAP1
0	0.825942	0.305	0.143	0	CD14M_1	SRA1
0	1.13583	0.249	0.087	0	CD14M_1	RHOT1
0	0.724797	0.313	0.151	0	CD14M_1	G6PD
0	0.827442	0.288	0.126	0	CD14M_1	AFTPH
0	0.618432	0.335	0.174	0	CD14M_1	DNM2
0	0.665686	0.323	0.162	0	CD14M_1	PPP1CB
0	0.753643	0.318	0.157	0	CD14M_1	CHCHD5
0	1.56865	0.213	0.052	0	CD14M_1	HHEX
0	0.798219	0.285	0.124	0	CD14M_1	VCL
0	1.67632	0.203	0.043	0	CD14M_1	ADAMTSL4-AS1
0	0.495872	0.339	0.179	0	CD14M_1	ANKRD17
0	0.383399	0.927	0.767	0	CD14M_1	ATP5MG
0	0.78758	0.308	0.148	0	CD14M_1	MTMR14
0	-6.25422	0.003	0.163	0	CD14M_1	CARD11
0	0.270703	0.371	0.211	0	CD14M_1	EXOC4
0	0.929928	0.254	0.094	0	CD14M_1	SPAG9
0	0.807401	0.287	0.127	0	CD14M_1	SDCCAG8
0	1.19576	0.235	0.075	0	CD14M_1	DAPP1
0	1.21812	0.234	0.075	0	CD14M_1	KIAA0232
0	0.86604	0.267	0.108	0	CD14M_1	ST8SIA4
0	0.93752	0.268	0.109	0	CD14M_1	RABGEF1
0	0.944774	0.253	0.094	0	CD14M_1	ANTXR2
0	0.694205	0.299	0.14	0	CD14M_1	PARP14
0	0.854598	0.287	0.128	0	CD14M_1	ADPGK
0	0.571759	0.345	0.186	0	CD14M_1	BRD4
0	0.39532	0.395	0.237	0	CD14M_1	ANKHD1
0	0.509861	0.395	0.237	0	CD14M_1	ZNHIT1
0	-1.49815	0.564	0.722	0	CD14M_1	HSPA8
0	0.574603	0.322	0.164	0	CD14M_1	GSK3B
0	-6.7162	0.002	0.16	0	CD14M_1	SIT1
0	0.438203	0.373	0.215	0	CD14M_1	PTBP3
0	1.4257	0.222	0.064	0	CD14M_1	LYL1
0	0.711631	0.304	0.146	0	CD14M_1	NORAD
0	1.17657	0.236	0.078	0	CD14M_1	PSTPIP2
0	0.504349	0.398	0.241	0	CD14M_1	FAAP20
0	-1.47134	0.18	0.337	0	CD14M_1	MAT2B
0	0.773715	0.267	0.11	0	CD14M_1	HIPK2
0	0.448888	0.398	0.241	0	CD14M_1	DDX21
0	0.871241	0.275	0.118	0	CD14M_1	CCPG1
0	0.523996	0.371	0.214	0	CD14M_1	CMTM7
0	2.07193	0.19	0.033	0	CD14M_1	INPPL1
0	0.391204	0.436	0.279	0	CD14M_1	DYNLL1
0	0.870303	0.271	0.115	0	CD14M_1	ARL8B
0	0.544278	0.978	0.822	0	CD14M_1	MYL6
0	0.323026	0.333	0.177	0	CD14M_1	RAP1GAP2
0	1.03039	0.265	0.109	0	CD14M_1	A1BG
0	0.937037	0.261	0.105	0	CD14M_1	DHRSX
0	1.4364	0.212	0.056	0	CD14M_1	SPOPL
0	-1.64027	0.155	0.311	0	CD14M_1	KIF2A
0	-2.57411	0.062	0.218	0	CD14M_1	ARID5B
0	2.8814	0.168	0.012	0	CD14M_1	MCEMP1
0	-3.99212	0.017	0.173	0	CD14M_1	THEM4
0	1.19666	0.238	0.082	0	CD14M_1	PIGX
0	1.14088	0.241	0.085	0	CD14M_1	HOTAIRM1
0	1.11931	0.234	0.079	0	CD14M_1	ADAM17
0	-2.36555	0.076	0.231	0	CD14M_1	PTPN4
0	0.976882	0.252	0.097	0	CD14M_1	KIAA0319L
0	1.19598	0.225	0.07	0	CD14M_1	HDAC4
0	-2.00636	0.099	0.254	0	CD14M_1	PPP3CC
0	1.01745	0.243	0.088	0	CD14M_1	RRBP1
0	-6.09084	0.003	0.158	0	CD14M_1	NFATC2
0	1.62754	0.209	0.054	0	CD14M_1	RENBP
0	1.36731	0.204	0.049	0	CD14M_1	RAPGEF2
0	0.487225	0.407	0.252	0	CD14M_1	NDUFS6
0	0.404216	0.434	0.279	0	CD14M_1	VAPA
0	1.37422	0.996	0.842	0	CD14M_1	GAPDH
0	-7.37302	0.001	0.155	0	CD14M_1	SH2D2A
0	1.97467	0.187	0.033	0	CD14M_1	NPL
0	2.55625	0.174	0.02	0	CD14M_1	AC096667.1
0	0.554916	0.326	0.173	0	CD14M_1	SH3GLB1
0	0.65553	0.341	0.188	0	CD14M_1	NDUFB5
0	1.56173	0.201	0.048	0	CD14M_1	DENND3
0	0.841752	0.256	0.103	0	CD14M_1	LARP4B
0	0.676417	0.277	0.124	0	CD14M_1	PHKB
0	0.582315	0.317	0.164	0	CD14M_1	NFE2L2
0	1.82374	0.195	0.042	0	CD14M_1	GM2A
0	0.38456	0.385	0.232	0	CD14M_1	PHIP
0	1.86588	0.186	0.033	0	CD14M_1	SGK1
0	0.432678	0.324	0.171	0	CD14M_1	DENND4A
0	1.52519	0.205	0.052	0	CD14M_1	PITPNA
0	1.25695	0.217	0.064	0	CD14M_1	CPD
0	-7.3554	0.002	0.155	0	CD14M_1	MATK
0	-2.02354	0.105	0.257	0	CD14M_1	MGAT4A
0	0.658851	0.279	0.127	0	CD14M_1	CLASP2
0	1.58336	0.2	0.048	0	CD14M_1	ABHD5
0	0.674659	0.28	0.128	0	CD14M_1	RAPGEF1
0	0.402921	0.334	0.182	0	CD14M_1	NCOA3
0	0.581304	0.32	0.168	0	CD14M_1	UBE2K
0	0.985253	0.245	0.093	0	CD14M_1	KCTD20
0	2.1146	0.184	0.032	0	CD14M_1	TBC1D2
0	0.493368	0.378	0.226	0	CD14M_1	YY1
0	1.45362	0.214	0.062	0	CD14M_1	BCKDK
0	1.81395	0.194	0.042	0	CD14M_1	NPEPL1
0	0.512315	0.961	0.809	0	CD14M_1	ATP5MC2
0	0.79975	0.279	0.128	0	CD14M_1	CDV3
0	-1.84701	0.103	0.254	0	CD14M_1	HMOX2
0	-2.43708	0.069	0.22	0	CD14M_1	AC092821.3
0	0.509385	0.369	0.218	0	CD14M_1	SLIRP
0	1.93549	0.187	0.036	0	CD14M_1	EPB41L3
0	1.05291	0.249	0.098	0	CD14M_1	NFIC
0	0.812956	0.302	0.151	0	CD14M_1	ETHE1
0	0.444084	0.36	0.209	0	CD14M_1	DDX3X
0	1.53654	0.197	0.047	0	CD14M_1	TMEM91
0	0.724828	0.302	0.152	0	CD14M_1	HADHB
0	0.590778	0.299	0.149	0	CD14M_1	BABAM2
0	2.09433	0.178	0.028	0	CD14M_1	CCR1
0	1.34027	0.209	0.059	0	CD14M_1	AC009093.2
0	0.470536	0.3	0.15	0	CD14M_1	BCAS3
0	1.04457	0.235	0.085	0	CD14M_1	SOAT1
0	0.528718	0.348	0.198	0	CD14M_1	UPP1
0	0.513015	0.344	0.194	0	CD14M_1	TOP1
0	0.385701	0.945	0.795	0	CD14M_1	RPS11
0	0.90328	0.99	0.841	0	CD14M_1	H3F3A
0	2.16957	0.178	0.029	0	CD14M_1	CARD9
0	0.610691	0.316	0.167	0	CD14M_1	GIT2
0	0.589514	0.294	0.145	0	CD14M_1	RAB8B
0	1.97378	0.179	0.03	0	CD14M_1	ATP6V0A1
0	1.11299	0.237	0.088	0	CD14M_1	ARHGAP27
0	0.397161	0.351	0.202	0	CD14M_1	REL
0	1.51454	0.198	0.05	0	CD14M_1	KIF1B
0	1.62081	0.195	0.047	0	CD14M_1	CAMK1
0	0.804374	0.266	0.118	0	CD14M_1	RAF1
0	0.475227	0.323	0.175	0	CD14M_1	TLE4
0	0.716448	0.252	0.104	0	CD14M_1	RALGAPA2
0	0.483513	0.319	0.171	0	CD14M_1	RB1CC1
0	0.379641	0.369	0.221	0	CD14M_1	WNK1
0	-5.44748	0.007	0.155	0	CD14M_1	KLRG1
0	0.815971	0.244	0.096	0	CD14M_1	MED13
0	-1.88057	0.099	0.247	0	CD14M_1	RASAL3
0	2.12337	0.178	0.03	0	CD14M_1	CEBPA
0	1.41287	0.202	0.055	0	CD14M_1	SLC49A4
0	1.54258	0.196	0.049	0	CD14M_1	SLC44A1
0	0.980458	0.234	0.087	0	CD14M_1	TFCP2
0	-1.64406	0.131	0.278	0	CD14M_1	TMC8
0	0.331044	0.34	0.193	0	CD14M_1	ACTN4
0	0.641597	0.299	0.152	0	CD14M_1	BOD1L1
0	0.728121	0.297	0.15	0	CD14M_1	TIMM8B
0	1.38446	0.195	0.049	0	CD14M_1	TBC1D8
0	0.44604	0.34	0.194	0	CD14M_1	CHD1
0	-1.59019	0.594	0.74	0	CD14M_1	SARAF
0	0.593482	0.332	0.186	0	CD14M_1	RNASEH2C
0	0.913692	0.262	0.116	0	CD14M_1	CTDNEP1
0	2.62703	0.163	0.017	0	CD14M_1	VSTM1
0	0.539564	0.363	0.217	0	CD14M_1	MRPL33
0	1.23458	0.209	0.063	0	CD14M_1	FOSL2
0	-7.19385	0.003	0.149	0	CD14M_1	CD8A
0	1.30465	0.208	0.062	0	CD14M_1	MFSD14B
0	0.645325	0.313	0.167	0	CD14M_1	DNAJC4
0	2.32422	0.173	0.027	0	CD14M_1	ZDHHC1
0	-2.00648	0.089	0.235	0	CD14M_1	DNAJB1
0	-2.24661	0.082	0.227	0	CD14M_1	RCAN3
0	1.51636	0.197	0.052	0	CD14M_1	RUFY3
0	0.574698	0.323	0.178	0	CD14M_1	EIF4EBP2
0	0.570755	0.328	0.183	0	CD14M_1	CALCOCO2
0	0.664751	0.295	0.15	0	CD14M_1	DCP2
0	0.595329	0.307	0.162	0	CD14M_1	KLF13
0	-1.26881	0.267	0.412	0	CD14M_1	EIF4A2
0	0.430567	0.328	0.184	0	CD14M_1	PUM1
0	-2.70772	0.05	0.194	0	CD14M_1	GBP5
0	1.00398	0.234	0.09	0	CD14M_1	OTULINL
0	1.47664	0.192	0.048	0	CD14M_1	CPEB4
0	1.37418	0.201	0.057	0	CD14M_1	FGD2
0	-3.40931	0.019	0.163	0	CD14M_1	RGCC
0	0.577106	0.272	0.128	0	CD14M_1	ARIH1
0	0.698723	0.261	0.117	0	CD14M_1	ZNF652
0	0.280206	0.334	0.191	0	CD14M_1	PLCL2
0	1.05255	0.233	0.09	0	CD14M_1	GLB1
0	0.969583	0.252	0.109	0	CD14M_1	HSPA1A
0	1.01927	0.223	0.08	0	CD14M_1	ARMH3
0	0.387783	0.365	0.222	0	CD14M_1	HNRNPH1
0	1.76887	0.185	0.042	0	CD14M_1	KCNK6
0	0.824161	0.219	0.077	0	CD14M_1	PRKCE
0	1.44166	0.193	0.051	0	CD14M_1	SLC6A6
0	0.513027	0.332	0.19	0	CD14M_1	NPEPPS
0	0.928634	0.233	0.091	0	CD14M_1	PACSIN2
0	-4.40231	0.011	0.153	0	CD14M_1	TRABD2A
0	-5.99483	0.011	0.153	0	CD14M_1	SPON2
0	0.488287	0.351	0.209	0	CD14M_1	SSR1
0	1.32221	0.209	0.067	0	CD14M_1	SLC12A9
0	0.297804	0.346	0.204	0	CD14M_1	CAMK1D
0	0.30103	0.31	0.168	0	CD14M_1	VTI1A
0	-1.54341	0.141	0.283	0	CD14M_1	BUB3
0	0.574603	0.293	0.151	0	CD14M_1	PARP4
0	-2.13178	0.078	0.219	0	CD14M_1	PRKACB
0	0.657782	0.281	0.14	0	CD14M_1	UBE2E1
0	-3.15615	0.027	0.168	0	CD14M_1	ANXA2R
0	0.50088	0.337	0.196	0	CD14M_1	PSMA4
0	0.584846	0.32	0.179	0	CD14M_1	DNAJC7
0	0.359649	0.363	0.222	0	CD14M_1	PAFAH1B1
0	0.702309	0.296	0.155	0	CD14M_1	TIMM13
0	0.337923	0.338	0.198	0	CD14M_1	EPS15
0	0.965655	0.219	0.079	0	CD14M_1	RPS6KC1
0	0.4818	0.28	0.14	0	CD14M_1	NSMCE2
0	0.576297	0.314	0.174	0	CD14M_1	PHPT1
0	1.37305	0.189	0.049	0	CD14M_1	IPMK
0	1.05156	0.221	0.081	0	CD14M_1	MARK2
0	1.21768	0.214	0.074	0	CD14M_1	PER1
0	1.52795	0.189	0.049	0	CD14M_1	ETS2
0	-5.81926	0.006	0.146	0	CD14M_1	ANK3
0	0.707258	0.241	0.101	0	CD14M_1	SPPL3
0	-5.63521	0.005	0.145	0	CD14M_1	CCL4
0	0.984894	0.235	0.095	0	CD14M_1	RELB
0	1.29342	0.181	0.041	0	CD14M_1	TMEM164
0	1.05152	0.227	0.088	0	CD14M_1	VAMP3
0	0.702456	0.25	0.111	0	CD14M_1	ATF6
0	1.45175	0.194	0.055	0	CD14M_1	TNK2
0	0.813041	0.244	0.105	0	CD14M_1	ERGIC1
0	0.855179	0.253	0.114	0	CD14M_1	TRIM8
0	1.99561	0.167	0.028	0	CD14M_1	ULK1
0	0.540573	0.333	0.194	0	CD14M_1	CIAO2A
0	-1.35342	0.503	0.642	0	CD14M_1	NOP53
0	-1.34324	0.301	0.44	0	CD14M_1	PRMT2
0	0.445265	0.312	0.173	0	CD14M_1	RPS6KA3
0	0.461751	0.282	0.143	0	CD14M_1	TRAPPC9
0	1.05236	0.208	0.069	0	CD14M_1	GSN
0	0.698479	0.282	0.143	0	CD14M_1	TUBGCP2
0	1.8526	0.176	0.037	0	CD14M_1	SECTM1
0	0.462253	0.334	0.196	0	CD14M_1	KCNAB2
0	0.675578	0.266	0.128	0	CD14M_1	SPEN
0	0.873574	0.25	0.112	0	CD14M_1	DUSP23
0	1.42938	0.189	0.051	0	CD14M_1	ZFYVE16
0	-2.47632	0.045	0.183	0	CD14M_1	SNRPN
0	1.02066	0.22	0.082	0	CD14M_1	MAPK8IP3
0	0.545733	0.318	0.18	0	CD14M_1	ACADVL
0	1.51656	0.187	0.049	0	CD14M_1	RNF135
0	2.68039	0.153	0.015	0	CD14M_1	AC011472.2
0	0.796429	0.261	0.123	0	CD14M_1	SMS
0	0.610264	0.314	0.176	0	CD14M_1	IDH3G
0	0.644718	0.295	0.157	0	CD14M_1	SCNM1
0	-4.25364	0.036	0.174	0	CD14M_1	FCGR3A
0	0.594014	0.309	0.171	0	CD14M_1	ABTB1
0	1.70802	0.18	0.042	0	CD14M_1	MLKL
0	0.32267	0.295	0.157	0	CD14M_1	LDLRAD4
0	0.629682	0.273	0.136	0	CD14M_1	CAMTA1
0	0.84742	0.246	0.109	0	CD14M_1	STX12
0	0.806551	0.258	0.121	0	CD14M_1	ARF3
0	1.01636	0.212	0.075	0	CD14M_1	SUSD6
0	0.418936	0.338	0.201	0	CD14M_1	DYNC1H1
0	-1.30733	0.318	0.455	0	CD14M_1	LITAF
0	1.40008	0.191	0.054	0	CD14M_1	TRIM25
0	2.13417	0.163	0.026	0	CD14M_1	INSR
0	1.09249	0.216	0.079	0	CD14M_1	PNPLA6
0	1.25438	0.2	0.063	0	CD14M_1	PARVB
0	1.21483	0.205	0.068	0	CD14M_1	TENT5A
0	0.442515	0.258	0.122	0	CD14M_1	VAV3
0	2.70455	0.154	0.018	0	CD14M_1	MTMR11
0	0.787181	0.259	0.123	0	CD14M_1	MYD88
0	2.31633	0.156	0.02	0	CD14M_1	DGKG
0	0.661382	0.274	0.138	0	CD14M_1	OGDH
0	1.20873	0.21	0.074	0	CD14M_1	FUOM
0	-2.20147	0.075	0.211	0	CD14M_1	DGKA
0	1.05994	0.21	0.074	0	CD14M_1	UHRF1BP1L
0	1.80745	0.167	0.031	0	CD14M_1	LPCAT2
0	0.998076	0.216	0.08	0	CD14M_1	KDM4B
0	-7.16455	0.002	0.138	0	CD14M_1	IL2RB
0	0.759636	0.236	0.1	0	CD14M_1	PDLIM5
0	1.65367	0.173	0.037	0	CD14M_1	BASP1
0	1.72053	0.175	0.039	0	CD14M_1	AP5B1
0	1.28348	0.191	0.056	0	CD14M_1	SUSD1
0	-3.18085	0.026	0.161	0	CD14M_1	SVIP
0	-5.57329	0.005	0.14	0	CD14M_1	NELL2
0	0.971061	0.221	0.086	0	CD14M_1	MIDN
0	0.765271	0.267	0.132	0	CD14M_1	EPN1
0	1.21432	0.204	0.069	0	CD14M_1	C15orf39
0	0.574396	0.301	0.166	0	CD14M_1	LENG8
0	1.68364	0.172	0.037	0	CD14M_1	NHSL2
0	-1.47476	0.225	0.36	0	CD14M_1	MT-ND6
0	-1.25399	0.272	0.407	0	CD14M_1	CYTIP
0	0.603011	0.264	0.13	0	CD14M_1	USP48
0	0.783042	0.234	0.1	0	CD14M_1	HTT
0	1.46298	0.177	0.043	0	CD14M_1	GAPT
0	-2.7547	0.034	0.168	0	CD14M_1	PHF1
0	2.21539	0.157	0.023	0	CD14M_1	CNTLN
0	1.19016	0.198	0.064	0	CD14M_1	SP1
0	0.894043	0.23	0.096	0	CD14M_1	RCBTB2
0	0.659341	0.238	0.104	0	CD14M_1	SLC12A6
0	-6.00231	0.003	0.137	0	CD14M_1	RASGRP1
0	1.88129	0.166	0.032	0	CD14M_1	LRRK1
0	2.1425	0.16	0.026	0	CD14M_1	DUSP3
0	0.502168	0.308	0.174	0	CD14M_1	ZBTB7A
0	1.25967	0.188	0.054	0	CD14M_1	BTK
0	1.03967	0.211	0.078	0	CD14M_1	SLC25A24
0	1.23112	0.19	0.057	0	CD14M_1	TRAK1
0	-3.69405	0.027	0.16	0	CD14M_1	CISH
0	1.67978	0.176	0.043	0	CD14M_1	SH3TC1
0	0.415574	0.95	0.817	0	CD14M_1	ITM2B
0	-1.16548	0.286	0.419	0	CD14M_1	DDX24
0	0.877734	0.221	0.088	0	CD14M_1	TRAF3
0	0.536847	0.31	0.177	0	CD14M_1	VPS35
0	2.33243	0.152	0.019	0	CD14M_1	FAM157C
0	0.672982	0.238	0.105	0	CD14M_1	FBXL20
0	1.67426	0.175	0.042	0	CD14M_1	RRP12
0	-1.19665	0.341	0.474	0	CD14M_1	HIST1H4C
0	0.560859	0.274	0.142	0	CD14M_1	TBC1D1
0	1.62379	0.176	0.044	0	CD14M_1	NBPF26
0	-7.19632	0.003	0.135	0	CD14M_1	CD8B
0	-1.44963	0.592	0.724	0	CD14M_1	NPM1
0	1.30272	0.185	0.053	0	CD14M_1	ANKS1A
0	2.03327	0.161	0.029	0	CD14M_1	TTYH3
0	0.901663	0.212	0.08	0	CD14M_1	GARS-DT
0	1.46531	0.178	0.046	0	CD14M_1	ZNF438
0	1.10636	0.202	0.07	0	CD14M_1	PPFIA1
0	1.19739	0.188	0.056	0	CD14M_1	CIITA
0	1.27753	0.191	0.059	0	CD14M_1	DEF8
0	1.83483	0.165	0.033	0	CD14M_1	KSR1
0	0.812373	0.245	0.113	0	CD14M_1	NDUFV3
0	0.495007	0.296	0.164	0	CD14M_1	NSD1
0	-1.31188	0.234	0.366	0	CD14M_1	RBL2
0	-1.37089	0.164	0.296	0	CD14M_1	ICAM2
0	0.378048	0.296	0.164	0	CD14M_1	ITCH
0	0.533803	0.32	0.189	0	CD14M_1	PSMB4
0	0.520558	0.264	0.133	0	CD14M_1	DGKD
0	0.719886	0.243	0.112	0	CD14M_1	RBM5
0	-1.19291	0.303	0.434	0	CD14M_1	ANXA6
0	1.29542	0.184	0.053	0	CD14M_1	TFEB
0	0.822849	0.243	0.112	0	CD14M_1	NIPSNAP2
0	0.578097	0.266	0.135	0	CD14M_1	PHF20L1
0	0.965622	0.224	0.093	0	CD14M_1	COMMD9
0	1.98525	0.157	0.026	0	CD14M_1	CATSPER1
0	0.854881	0.245	0.114	0	CD14M_1	YIF1B
0	0.734026	0.235	0.104	0	CD14M_1	PI4KA
0	1.49249	0.172	0.041	0	CD14M_1	GPD2
0	1.62915	0.172	0.041	0	CD14M_1	RELT
0	0.52339	0.276	0.146	0	CD14M_1	TRIM44
0	0.651243	0.277	0.147	0	CD14M_1	UBA1
0	0.91132	0.209	0.079	0	CD14M_1	ZMYM4
0	0.522083	0.249	0.119	0	CD14M_1	TMEM131
0	-1.48085	0.137	0.267	0	CD14M_1	MZT2A
0	2.07834	0.156	0.026	0	CD14M_1	PDLIM7
0	0.612855	0.265	0.135	0	CD14M_1	TRIM38
0	0.682438	0.225	0.095	0	CD14M_1	SNTB1
0	0.570137	0.286	0.156	0	CD14M_1	CTNNB1
0	0.554494	0.298	0.168	0	CD14M_1	SNF8
0	0.502266	0.275	0.146	0	CD14M_1	ACTN1
0	-5.88978	0.004	0.133	0	CD14M_1	ITGA6
0	1.18886	0.186	0.057	0	CD14M_1	GALNT7
0	1.17865	0.194	0.065	0	CD14M_1	ITGA5
0	2.17151	0.153	0.024	0	CD14M_1	RAB20
0	1.45162	0.181	0.052	0	CD14M_1	CLCN7
0	0.366824	0.293	0.164	0	CD14M_1	ARFGEF1
0	0.466742	0.289	0.16	0	CD14M_1	ZMYM2
0	0.831443	0.219	0.091	0	CD14M_1	LRRC8D
0	1.12968	0.202	0.074	0	CD14M_1	NRROS
0	1.70025	0.162	0.034	0	CD14M_1	CTNND1
0	0.722205	0.223	0.095	0	CD14M_1	OAS1
0	0.577996	0.228	0.1	0	CD14M_1	PLCG2
0	0.321264	0.292	0.164	0	CD14M_1	CUL3
0	3.0994	0.137	0.01	0	CD14M_1	PLA2G7
0	1.12922	0.203	0.076	0	CD14M_1	TOLLIP
0	2.61907	0.143	0.016	0	CD14M_1	OAF
0	0.548298	0.267	0.14	0	CD14M_1	DNAJC3
0	1.974	0.159	0.032	0	CD14M_1	CD300C
0	2.24702	0.15	0.023	0	CD14M_1	GNA15
0	1.02294	0.21	0.083	0	CD14M_1	TPD52L2
0	2.2166	0.149	0.022	0	CD14M_1	TLR8
0	2.39704	0.139	0.013	0	CD14M_1	MARC1
0	1.91705	0.155	0.029	0	CD14M_1	GPAT3
0	1.22303	0.19	0.064	0	CD14M_1	OAZ2
0	1.86837	0.156	0.03	0	CD14M_1	TK2
0	2.09276	0.155	0.029	0	CD14M_1	RAB34
0	-3.49384	0.02	0.146	0	CD14M_1	TSEN54
0	-1.08745	0.507	0.633	0	CD14M_1	CIRBP
0	0.735792	0.246	0.12	0	CD14M_1	ERCC1
0	1.15493	0.199	0.073	0	CD14M_1	DNTTIP1
0	0.458998	0.287	0.161	0	CD14M_1	PBRM1
0	0.512109	0.294	0.168	0	CD14M_1	LYPLA1
0	0.55769	0.29	0.164	0	CD14M_1	GNPTG
0	0.246682	0.269	0.144	0	CD14M_1	KDM6A
0	-2.2017	0.068	0.193	0	CD14M_1	RUNX3
0	0.427398	0.299	0.174	0	CD14M_1	NRDC
0	1.23048	0.186	0.061	0	CD14M_1	TMEM127
0	0.871598	0.199	0.074	0	CD14M_1	LCORL
0	0.635668	0.243	0.118	0	CD14M_1	UIMC1
0	1.10308	0.201	0.076	0	CD14M_1	NQO2
0	-1.71403	0.124	0.249	0	CD14M_1	SYNE1
0	0.592305	0.247	0.122	0	CD14M_1	RIC1
0	-7.67589	0.002	0.127	0	CD14M_1	CLIC3
0	0.666303	0.257	0.132	0	CD14M_1	GLTP
0	1.79259	0.158	0.033	0	CD14M_1	P2RX7
0	-3.08019	0.028	0.153	0	CD14M_1	GPR183
0	0.712739	0.224	0.099	0	CD14M_1	NUFIP2
0	1.27742	0.188	0.063	0	CD14M_1	GALK1
0	1.0717	0.191	0.066	0	CD14M_1	PISD
0	0.80628	0.239	0.114	0	CD14M_1	GNG10
0	1.36818	0.173	0.048	0	CD14M_1	NPLOC4
0	2.42984	0.143	0.018	0	CD14M_1	PLPPR2
0	0.61887	0.271	0.147	0	CD14M_1	PARL
0	0.651338	0.995	0.871	0	CD14M_1	SH3BGRL3
0	1.28955	0.187	0.063	0	CD14M_1	AMPD2
0	0.648389	0.256	0.132	0	CD14M_1	ATP1B3
0	1.13977	0.187	0.063	0	CD14M_1	TMEM33
0	0.522503	0.244	0.12	0	CD14M_1	GSAP
0	0.740941	0.215	0.091	0	CD14M_1	CHPT1
0	0.907341	0.212	0.088	0	CD14M_1	TM9SF4
0	-6.14955	0.004	0.128	0	CD14M_1	TSHZ2
0	2.33212	0.142	0.018	0	CD14M_1	HK2
0	-4.00133	0.02	0.144	0	CD14M_1	DUSP2
0	1.37583	0.171	0.048	0	CD14M_1	KLHL18
0	1.12815	0.186	0.063	0	CD14M_1	CTNNBIP1
0	1.69991	0.155	0.032	0	CD14M_1	PLAGL1
0	1.26449	0.18	0.057	0	CD14M_1	KDM6B
0	1.90359	0.154	0.031	0	CD14M_1	DENND6B
0	0.95576	0.204	0.081	0	CD14M_1	NUDT3
0	1.44095	0.173	0.05	0	CD14M_1	FUCA2
0	0.596713	0.24	0.117	0	CD14M_1	SVIL
0	1.95311	0.142	0.019	0	CD14M_1	AQP9
0	2.44968	0.142	0.019	0	CD14M_1	TST
0	-1.2967	0.169	0.292	0	CD14M_1	HSPE1
0	-1.27225	0.229	0.352	0	CD14M_1	CD47
0	-1.33656	0.148	0.27	0	CD14M_1	MED10
0	1.30059	0.171	0.049	0	CD14M_1	MIR181A1HG
0	2.42165	0.138	0.016	0	CD14M_1	AC005280.2
0	1.09624	0.196	0.074	0	CD14M_1	MAN2C1
0	2.49973	0.137	0.015	0	CD14M_1	CD300LB
0	-1.70347	0.105	0.227	0	CD14M_1	AC119396.1
0	0.694727	0.244	0.122	0	CD14M_1	ARHGEF2
0	0.513989	0.248	0.126	0	CD14M_1	SLC9A9
0	0.425891	0.251	0.129	0	CD14M_1	TBL1XR1
0	1.08245	0.177	0.055	0	CD14M_1	E2F3
0	-3.2639	0.031	0.153	0	CD14M_1	MLLT3
0	0.71928	0.221	0.099	0	CD14M_1	CACUL1
0	0.45105	0.975	0.853	0	CD14M_1	COX4I1
0	0.656862	0.239	0.117	0	CD14M_1	ME2
0	1.42097	0.172	0.05	0	CD14M_1	BCL3
0	-1.27034	0.283	0.404	0	CD14M_1	SLC9A3R1
0	1.43004	0.17	0.049	0	CD14M_1	TLE3
0	0.789237	0.213	0.092	0	CD14M_1	UBE4B
0	-1.84044	0.092	0.213	0	CD14M_1	LINC01138
0	1.15066	0.187	0.066	0	CD14M_1	RALB
0	0.871654	0.211	0.09	0	CD14M_1	DUSP22
0	0.63341	0.214	0.093	0	CD14M_1	AVL9
0	1.08805	0.183	0.062	0	CD14M_1	SLC36A4
0	0.51001	0.259	0.138	0	CD14M_1	USP8
0	0.587004	0.246	0.125	0	CD14M_1	SPPL2A
0	0.722302	0.191	0.07	0	CD14M_1	IRF8
0	1.57215	0.162	0.041	0	CD14M_1	LINC00278
0	0.55638	0.29	0.169	0	CD14M_1	ATP6AP1
0	0.562831	0.271	0.151	0	CD14M_1	ADIPOR1
0	1.45727	0.17	0.05	0	CD14M_1	MSRB2
0	0.160501	0.231	0.111	0	CD14M_1	HVCN1
0	0.956987	0.198	0.078	0	CD14M_1	KIAA0100
0	-2.31528	0.052	0.172	0	CD14M_1	THOC3
0	0.589828	0.214	0.094	0	CD14M_1	SGMS1
0	0.776252	0.994	0.874	0	CD14M_1	ATP5F1E
0	-2.23802	0.07	0.19	0	CD14M_1	APOBEC3G
0	0.840249	0.219	0.099	0	CD14M_1	BCOR
0	0.81634	0.198	0.079	0	CD14M_1	EIF4E3
0	0.590297	0.227	0.108	0	CD14M_1	VPS8
0	0.944225	0.193	0.074	0	CD14M_1	SLC25A13
0	2.35107	0.138	0.019	0	CD14M_1	ASRGL1
0	-3.29928	0.017	0.136	0	CD14M_1	SELENOM
0	-2.35925	0.046	0.165	0	CD14M_1	OFD1
0	-6.04884	0.003	0.122	0	CD14M_1	CD28
0	-1.22291	0.267	0.386	0	CD14M_1	TNFAIP8
0	0.918588	0.18	0.061	0	CD14M_1	CDYL
0	1.09751	0.182	0.063	0	CD14M_1	YWHAG
0	-3.16503	0.022	0.141	0	CD14M_1	ATP6V0E2
0	1.8003	0.153	0.034	0	CD14M_1	LINC00963
0	0.662824	0.245	0.126	0	CD14M_1	RABL6
0	0.833191	0.219	0.1	0	CD14M_1	MKNK2
0	0.518348	0.269	0.151	0	CD14M_1	CHD4
0	0.877643	0.198	0.08	0	CD14M_1	ECPAS
0	0.692111	0.225	0.107	0	CD14M_1	ADCY7
0	-2.4055	0.069	0.187	0	CD14M_1	RHOC
0	1.17412	0.175	0.057	0	CD14M_1	SCARB2
0	2.11601	0.147	0.029	0	CD14M_1	TSPAN4
0	0.664603	0.247	0.129	0	CD14M_1	ANAPC15
0	0.660146	0.99	0.872	0	CD14M_1	SERF2
0	2.08671	0.142	0.024	0	CD14M_1	SLC27A1
0	0.692752	0.244	0.126	0	CD14M_1	ZNF524
0	1.73076	0.15	0.032	0	CD14M_1	GK
0	0.426044	0.253	0.135	0	CD14M_1	USP9X
0	0.357457	0.235	0.117	0	CD14M_1	DYRK1A
0	2.10131	0.139	0.022	0	CD14M_1	HPSE
0	1.21188	0.168	0.051	0	CD14M_1	XRCC4
0	0.845837	0.203	0.086	0	CD14M_1	ATXN2
0	0.572315	0.26	0.143	0	CD14M_1	PABPN1
0	0.519285	0.264	0.147	0	CD14M_1	USF2
0	0.644712	0.221	0.104	0	CD14M_1	ZZEF1
0	-5.47256	0.004	0.121	0	CD14M_1	TGFBR3
0	1.08348	0.173	0.056	0	CD14M_1	VPS54
0	0.911999	0.205	0.088	0	CD14M_1	AZI2
0	2.00798	0.141	0.024	0	CD14M_1	PFKFB4
0	1.00774	0.174	0.057	0	CD14M_1	KLHL2
0	-2.82099	0.028	0.145	0	CD14M_1	SUSD3
0	1.19308	0.182	0.065	0	CD14M_1	NANS
0	-2.87168	0.029	0.146	0	CD14M_1	FKBP11
0	1.74591	0.149	0.032	0	CD14M_1	P2RX1
0	1.46757	0.159	0.042	0	CD14M_1	RP2
0	-7.34702	0.001	0.117	0	CD14M_1	NCR3
0	2.33407	0.137	0.021	0	CD14M_1	STAC3
0	1.74452	0.145	0.029	0	CD14M_1	CRYBG3
0	0.742684	0.21	0.094	0	CD14M_1	TBC1D14
0	1.74589	0.149	0.033	0	CD14M_1	GABBR1
0	1.21478	0.174	0.058	0	CD14M_1	BICD2
0	-5.72489	0.003	0.119	0	CD14M_1	ZEB1
0	0.456482	0.256	0.14	0	CD14M_1	SCFD1
0	-6.00669	0.002	0.118	0	CD14M_1	LINC01550
0	1.50262	0.158	0.042	0	CD14M_1	PLEKHO2
0	0.652875	0.256	0.14	0	CD14M_1	PEPD
0	1.95464	0.139	0.024	0	CD14M_1	LINC00877
0	0.695163	0.234	0.119	0	CD14M_1	SLC38A10
0	0.554063	0.232	0.117	0	CD14M_1	KIDINS220
0	1.0475	0.189	0.074	0	CD14M_1	NXF1
0	-2.5403	0.04	0.155	0	CD14M_1	SP140
0	0.679901	0.241	0.126	0	CD14M_1	QARS
0	1.01318	0.178	0.063	0	CD14M_1	DNAJC13
0	0.429284	0.243	0.128	0	CD14M_1	UBR5
0	-4.91294	0.006	0.121	0	CD14M_1	CD320
0	2.03509	0.138	0.024	0	CD14M_1	ARHGEF11
0	0.539596	0.232	0.118	0	CD14M_1	SLMAP
0	1.88992	0.139	0.025	0	CD14M_1	SNX30
0	2.52269	0.129	0.015	0	CD14M_1	CACNA2D3
0	2.32732	0.131	0.017	0	CD14M_1	LINC01001
0	0.912812	0.187	0.073	0	CD14M_1	PAFAH1B2
0	-6.85698	0.001	0.115	0	CD14M_1	NLRC3
0	1.5415	0.156	0.042	0	CD14M_1	FRAT2
0	0.865895	0.205	0.091	0	CD14M_1	PPP1R15A
0	-1.30374	0.591	0.705	0	CD14M_1	RAC2
0	0.642098	0.232	0.119	0	CD14M_1	PANK2
0	1.43731	0.137	0.024	0	CD14M_1	CSF2RB
0	-6.00013	0.002	0.115	0	CD14M_1	SHISAL2A
0	0.597393	0.226	0.113	0	CD14M_1	EEA1
0	-7.53349	0.001	0.114	0	CD14M_1	TBX21
0	2.06525	0.134	0.021	0	CD14M_1	ITSN1
0	0.691425	0.214	0.101	0	CD14M_1	GAK
0	1.00458	0.18	0.067	0	CD14M_1	SIL1
0	-1.60372	0.706	0.819	0	CD14M_1	BTG1
0	0.926672	0.199	0.087	0	CD14M_1	TNFAIP8L2
0	0.816726	0.203	0.091	0	CD14M_1	MGRN1
0	0.794472	0.201	0.089	0	CD14M_1	MINK1
0	0.625207	0.224	0.112	0	CD14M_1	CD58
0	0.696634	0.197	0.085	0	CD14M_1	MIR4435-2HG
0	0.663517	0.225	0.113	0	CD14M_1	NPTN
0	1.05296	0.181	0.069	0	CD14M_1	DENND4B
0	0.907467	0.178	0.066	0	CD14M_1	RYBP
0	1.52026	0.148	0.036	0	CD14M_1	MBOAT1
0	0.844548	0.177	0.065	0	CD14M_1	STRN3
0	1.76553	0.142	0.03	0	CD14M_1	ACSS2
0	0.297618	0.233	0.122	0	CD14M_1	DIP2B
0	0.851762	0.193	0.082	0	CD14M_1	PXK
0	-5.35594	0.005	0.116	0	CD14M_1	MYBL1
0	2.42893	0.127	0.016	0	CD14M_1	FGD6
0	1.38812	0.158	0.047	0	CD14M_1	SPTSSA
0	-5.73595	0.003	0.114	0	CD14M_1	TMEM204
0	1.40867	0.154	0.043	0	CD14M_1	METTL22
0	-4.30524	0.01	0.121	0	CD14M_1	SLFN12L
0	-3.28163	0.017	0.128	0	CD14M_1	ORMDL3
0	1.47632	0.15	0.039	0	CD14M_1	ITPRID2
0	1.84436	0.144	0.033	0	CD14M_1	CACNA2D4
0	1.12882	0.173	0.062	0	CD14M_1	PIEZO1
0	-2.79451	0.028	0.138	0	CD14M_1	SFXN1
0	1.31182	0.16	0.05	0	CD14M_1	MTF1
0	2.25666	0.128	0.018	0	CD14M_1	TLR5
0	2.09927	0.128	0.018	0	CD14M_1	PLD1
0	1.23009	0.156	0.046	0	CD14M_1	HIP1
0	0.614119	0.216	0.106	0	CD14M_1	STK24
0	2.4258	0.123	0.013	0	CD14M_1	AL163541.1
0	1.48925	0.148	0.038	0	CD14M_1	PLEKHM2
0	1.35823	0.152	0.042	0	CD14M_1	DHX57
0	0.580138	0.237	0.127	0	CD14M_1	FBXO9
0	0.825207	0.175	0.065	0	CD14M_1	PCSK5
0	-1.89403	0.066	0.176	0	CD14M_1	SRSF8
0	0.890786	0.179	0.069	0	CD14M_1	GALNT1
0	-1.03714	0.335	0.445	0	CD14M_1	CNN2
0	1.22432	0.165	0.056	0	CD14M_1	LFNG
0	1.14898	0.165	0.056	0	CD14M_1	SIN3B
0	0.795915	0.181	0.072	0	CD14M_1	GALNT2
0	2.64631	0.122	0.013	0	CD14M_1	NIBAN2
0	0.722489	0.214	0.105	0	CD14M_1	WASHC2C
0	2.24595	0.127	0.018	0	CD14M_1	NOD2
0	0.63628	0.24	0.131	0	CD14M_1	TPGS1
0	1.64949	0.138	0.03	0	CD14M_1	SRGAP2B
0	2.01951	0.13	0.022	0	CD14M_1	SFXN5
0	1.25008	0.163	0.055	0	CD14M_1	NKIRAS2
0	0.916052	0.18	0.072	0	CD14M_1	STK40
0	2.40215	0.125	0.017	0	CD14M_1	ADAMTSL4
0	2.5088	0.122	0.014	0	CD14M_1	ST3GAL6
0	0.463493	0.215	0.107	0	CD14M_1	LCOR
0	0.965565	0.179	0.071	0	CD14M_1	CD151
0	2.3691	0.121	0.013	0	CD14M_1	LIN7A
0	2.19017	0.126	0.018	0	CD14M_1	JDP2
0	0.658248	0.216	0.108	0	CD14M_1	ITGAE
0	1.2584	0.153	0.045	0	CD14M_1	ACOX1
0	0.912856	0.173	0.065	0	CD14M_1	HIPK1
0	-2.93922	0.034	0.142	0	CD14M_1	HIVEP2
0	0.58748	0.207	0.099	0	CD14M_1	RNF111
0	1.29097	0.149	0.041	0	CD14M_1	CXCL16
0	1.62136	0.138	0.031	0	CD14M_1	HSPA6
0	-3.00198	0.024	0.131	0	CD14M_1	SH3YL1
0	1.16767	0.161	0.054	0	CD14M_1	TLR1
0	0.653315	0.226	0.119	0	CD14M_1	NARS
0	0.833145	0.179	0.072	0	CD14M_1	KCMF1
0	0.603744	0.222	0.115	0	CD14M_1	PRKAR2A
0	0.737116	0.209	0.102	0	CD14M_1	PRCP
0	0.71599	0.187	0.08	0	CD14M_1	HECTD4
0	2.15706	0.127	0.02	0	CD14M_1	RFX2
0	-6.89049	0.001	0.108	0	CD14M_1	SIRPG
0	0.38432	0.981	0.874	0	CD14M_1	PFDN5
0	1.09004	0.173	0.066	0	CD14M_1	ORAI3
0	0.811724	0.195	0.089	0	CD14M_1	GIMAP8
0	1.63658	0.137	0.031	0	CD14M_1	FAR2
0	1.65415	0.139	0.033	0	CD14M_1	STRN4
0	0.846279	0.191	0.085	0	CD14M_1	LARP1
0	0.959537	0.153	0.047	0	CD14M_1	WDFY4
0	0.968973	0.177	0.071	0	CD14M_1	IKBIP
0	0.628488	0.223	0.117	0	CD14M_1	HCFC1R1
0	2.15802	0.126	0.02	0	CD14M_1	RILP
0	2.56294	0.117	0.012	0	CD14M_1	CCDC149
0	1.14854	0.159	0.054	0	CD14M_1	DSE
0	1.11232	0.164	0.059	0	CD14M_1	CCDC159
0	1.19853	0.151	0.046	0	CD14M_1	ATP13A3
0	0.795838	0.179	0.074	0	CD14M_1	KIF13B
0	0.975034	0.177	0.072	0	CD14M_1	MRPL23
0	-2.35768	0.048	0.153	0	CD14M_1	BIRC3
0	-6.36028	0.002	0.107	0	CD14M_1	APBA2
0	-6.86671	0.001	0.106	0	CD14M_1	SH2D1A
0	0.618218	0.206	0.101	0	CD14M_1	ANXA4
0	0.893257	0.173	0.068	0	CD14M_1	BMPR2
0	2.0552	0.126	0.022	0	CD14M_1	IL18
0	0.556874	0.19	0.086	0	CD14M_1	XYLT1
0	0.928674	0.181	0.077	0	CD14M_1	HDGF
0	-5.84192	0.002	0.106	0	CD14M_1	SLAMF6
0	0.722229	0.18	0.076	0	CD14M_1	TMCC1
0	0.467103	0.219	0.115	0	CD14M_1	PDE4D
0	-2.48055	0.043	0.147	0	CD14M_1	CHST12
0	1.27737	0.147	0.043	0	CD14M_1	SLC2A6
0	-6.61085	0.003	0.107	0	CD14M_1	KLRF1
0	2.10435	0.122	0.018	0	CD14M_1	TSHZ3
0	0.642029	0.215	0.111	0	CD14M_1	CHKB
0	0.945877	0.173	0.069	0	CD14M_1	SNX18
0	0.838287	0.193	0.09	0	CD14M_1	MTX1
0	0.582758	0.191	0.088	0	CD14M_1	UBR3
0	0.643894	0.194	0.091	0	CD14M_1	KLHL5
0	1.92323	0.128	0.025	0	CD14M_1	AGAP3
0	0.579456	0.196	0.093	0	CD14M_1	MFSD14C
0	1.66759	0.131	0.028	0	CD14M_1	SLC16A6
0	2.62358	0.114	0.011	0	CD14M_1	HOMER3
0	2.18579	0.121	0.018	0	CD14M_1	NLRC4
0	1.2945	0.146	0.043	0	CD14M_1	KLHL8
0	0.833099	0.183	0.08	0	CD14M_1	HSD17B4
0	-5.0241	0.005	0.108	0	CD14M_1	TPD52
0	2.28356	0.119	0.016	0	CD14M_1	CPM
0	0.734846	0.187	0.084	0	CD14M_1	YPEL2
0	2.43556	0.118	0.015	0	CD14M_1	IQSEC2
0	-1.21325	0.448	0.55	0	CD14M_1	GAS5
0	1.11645	0.157	0.055	0	CD14M_1	SLC27A3
0	0.911469	0.169	0.067	0	CD14M_1	SERTAD2
0	2.47567	0.117	0.015	0	CD14M_1	MARCO
0	0.549364	0.202	0.1	0	CD14M_1	DDX60L
0	0.889126	0.17	0.068	0	CD14M_1	HGSNAT
0	2.38426	0.114	0.012	0	CD14M_1	LPAR1
0	0.557869	0.198	0.096	0	CD14M_1	TM9SF3
0	1.36526	0.137	0.035	0	CD14M_1	HEATR5A
0	1.04393	0.159	0.057	0	CD14M_1	RFLNB
0	0.727576	0.194	0.092	0	CD14M_1	EFTUD2
0	0.888191	0.179	0.077	0	CD14M_1	LEPROT
0	1.09284	0.152	0.05	0	CD14M_1	FAM91A1
0	0.655963	0.204	0.102	0	CD14M_1	GLYR1
0	0.930575	0.172	0.07	0	CD14M_1	SELENOO
0	-0.931781	0.467	0.569	0	CD14M_1	NCL
0	-2.63706	0.032	0.133	0	CD14M_1	ODF2L
0	1.10998	0.159	0.058	0	CD14M_1	AHCYL1
0	0.968156	0.165	0.064	0	CD14M_1	PPTC7
0	1.68336	0.127	0.026	0	CD14M_1	LATS2
0	0.934647	0.16	0.059	0	CD14M_1	SLC23A2
0	2.30254	0.117	0.016	0	CD14M_1	TRPM2
0	2.02726	0.12	0.019	0	CD14M_1	ZNF804A
0	0.757465	0.181	0.08	0	CD14M_1	WDFY1
0	0.698232	0.186	0.085	0	CD14M_1	POLK
0	0.582605	0.185	0.084	0	CD14M_1	UBE3C
0	-4.44222	0.006	0.107	0	CD14M_1	APBB1
0	0.504636	0.204	0.103	0	CD14M_1	LRMP
0	1.21794	0.147	0.046	0	CD14M_1	ATP2A2
0	-7.54156	0.001	0.102	0	CD14M_1	S1PR5
0	-7.67474	0.001	0.101	0	CD14M_1	FCRL6
0	0.543624	0.199	0.099	0	CD14M_1	SMG7
0	2.32305	0.114	0.014	0	CD14M_1	IL1RN
0	0.844003	0.165	0.065	0	CD14M_1	TRAPPC11
0	2.20738	0.116	0.016	0	CD14M_1	ADAM9
0	1.56638	0.13	0.03	0	CD14M_1	ABCA1
0	-4.12937	0.008	0.108	0	CD14M_1	FAM102A
0	-2.39154	0.037	0.137	0	CD14M_1	CCND2
0	0.71786	0.19	0.09	0	CD14M_1	ATXN3
0	1.32798	0.138	0.038	0	CD14M_1	FMN1
0	-8.10021	0.001	0.101	0	CD14M_1	ADGRG1
0	-6.73773	0.002	0.102	0	CD14M_1	LINC01871
0	1.0409	0.15	0.05	0	CD14M_1	STK38L
0	-3.81149	0.021	0.121	0	CD14M_1	CD79B
0	0.724952	0.174	0.074	0	CD14M_1	NRIP1
0	-4.15228	0.011	0.11	0	CD14M_1	STMN1
0	0.628397	0.199	0.1	0	CD14M_1	CTBS
0	0.571195	0.186	0.087	0	CD14M_1	TRIM33
0	1.58141	0.131	0.032	0	CD14M_1	DAGLB
0	0.706878	0.186	0.087	0	CD14M_1	MSRA
0	1.60854	0.128	0.029	0	CD14M_1	FURIN
0	0.63189	0.2	0.101	0	CD14M_1	AP3D1
0	1.06861	0.148	0.049	0	CD14M_1	PFKFB3
0	0.70533	0.174	0.075	0	CD14M_1	NF1
0	-2.58424	0.035	0.133	0	CD14M_1	SPTBN1
0	1.08874	0.15	0.052	0	CD14M_1	HSPBAP1
0	0.816084	0.163	0.065	0	CD14M_1	TUBGCP3
0	1.04688	0.137	0.039	0	CD14M_1	ATP8B4
0	1.51424	0.133	0.035	0	CD14M_1	SLC66A2
0	-4.73936	0.006	0.104	0	CD14M_1	PARP15
0	0.698062	0.182	0.084	0	CD14M_1	USP7
0	1.34378	0.141	0.043	0	CD14M_1	PPP1R12C
0	1.44653	0.133	0.036	0	CD14M_1	TNFRSF10B
0	2.45201	0.11	0.013	0	CD14M_1	LDLRAD3
0	-6.12616	0.001	0.098	0	CD14M_1	BEX2
0	1.05333	0.142	0.045	0	CD14M_1	ALPK1
0	0.684628	0.164	0.068	0	CD14M_1	PPM1L
0	0.794482	0.161	0.065	0	CD14M_1	AHCYL2
0	1.8862	0.121	0.025	0	CD14M_1	SLC31A1
0	2.5606	0.106	0.01	0	CD14M_1	CLEC4D
0	0.96308	0.159	0.063	0	CD14M_1	GGA3
0	0.78379	0.165	0.069	0	CD14M_1	MIB1
0	-6.75706	0.001	0.097	0	CD14M_1	AC008555.4
0	-7.00031	0.001	0.097	0	CD14M_1	CD40LG
0	-0.912219	0.547	0.643	0	CD14M_1	HNRNPDL
0	1.32632	0.133	0.038	0	CD14M_1	AGO1
0	2.77853	0.103	0.008	0	CD14M_1	WLS
0	-3.53635	0.013	0.108	0	CD14M_1	PRDM1
0	1.57366	0.125	0.03	0	CD14M_1	NEK6
0	1.11181	0.148	0.053	0	CD14M_1	UBAC1
0	0.598242	0.183	0.088	0	CD14M_1	BTAF1
0	0.823308	0.161	0.066	0	CD14M_1	BTBD7
0	1.57366	0.118	0.023	0	CD14M_1	OSBPL1A
0	-6.50414	0.001	0.096	0	CD14M_1	TMIGD2
0	-6.71482	0.001	0.096	0	CD14M_1	PLEKHF1
0	0.905048	0.162	0.067	0	CD14M_1	ACOT9
0	1.232	0.14	0.046	0	CD14M_1	TXNRD2
0	1.47694	0.124	0.03	0	CD14M_1	CLIC4
0	1.53016	0.126	0.032	0	CD14M_1	ARHGAP31
0	1.3027	0.128	0.034	0	CD14M_1	ARSB
0	2.57079	0.105	0.011	0	CD14M_1	NDST1
0	1.6829	0.122	0.028	0	CD14M_1	FAM214B
0	-6.0902	0.002	0.096	0	CD14M_1	GPR174
0	0.737675	0.179	0.085	0	CD14M_1	EIF3B
0	1.15088	0.142	0.048	0	CD14M_1	DHRS7B
0	0.704967	0.174	0.08	0	CD14M_1	MAST3
0	0.732682	0.17	0.077	0	CD14M_1	MDM2
0	-5.36746	0.004	0.097	0	CD14M_1	LINC01934
0	-5.46106	0.004	0.097	0	CD14M_1	NCALD
0	1.41169	0.127	0.034	0	CD14M_1	MYOF
0	2.31366	0.106	0.013	0	CD14M_1	MS4A4E
0	-7.24346	0.001	0.094	0	CD14M_1	PRSS23
0	2.45036	0.106	0.013	0	CD14M_1	THBS1
0	2.34083	0.107	0.014	0	CD14M_1	SIRPD
0	0.509583	0.172	0.079	0	CD14M_1	PBX3
0	0.663052	0.171	0.079	0	CD14M_1	FBXO42
0	0.678363	0.17	0.078	0	CD14M_1	ZXDC
0	2.68495	0.101	0.009	0	CD14M_1	WDR49
0	0.795823	0.169	0.077	0	CD14M_1	EIF2AK4
0	0.971177	0.157	0.065	0	CD14M_1	BX284668.5
0	2.49865	0.103	0.011	0	CD14M_1	LINC02785
0	0.86598	0.156	0.064	0	CD14M_1	ARNT
0	1.0734	0.147	0.055	0	CD14M_1	PEA15
0	1.72256	0.115	0.023	0	CD14M_1	F5
0	1.10685	0.143	0.051	0	CD14M_1	LMNB1
0	0.764364	0.159	0.067	0	CD14M_1	AL133415.1
0	0.836413	0.154	0.062	0	CD14M_1	CCDC6
0	0.940086	0.156	0.064	0	CD14M_1	CEBPG
0	1.20425	0.135	0.044	0	CD14M_1	MTHFR
0	1.14573	0.138	0.047	0	CD14M_1	RCC2
0	1.13557	0.138	0.047	0	CD14M_1	CYSTM1
0	0.676796	0.166	0.075	0	CD14M_1	ATF7
0	1.05941	0.139	0.048	0	CD14M_1	TBC1D2B
0	1.48814	0.118	0.027	0	CD14M_1	RNF19B
0	1.26958	0.128	0.037	0	CD14M_1	NFIA
0	1.54381	0.118	0.027	0	CD14M_1	SETD7
0	-8.07495	0.002	0.093	0	CD14M_1	GZMK
0	1.82069	0.112	0.021	0	CD14M_1	GCNT2
0	1.71498	0.115	0.024	0	CD14M_1	DRAM1
0	0.797996	0.177	0.086	0	CD14M_1	HAUS4
0	1.61077	0.12	0.029	0	CD14M_1	MAN2A2
0	0.693578	0.167	0.077	0	CD14M_1	PAPSS1
0	0.913631	0.137	0.047	0	CD14M_1	FER
0	2.44546	0.101	0.011	0	CD14M_1	FBN2
0	0.83429	0.161	0.071	0	CD14M_1	BRD3
0	1.15627	0.137	0.047	0	CD14M_1	RIPOR1
0	1.16017	0.142	0.052	0	CD14M_1	ZBTB7B
0	0.995567	0.146	0.056	0	CD14M_1	CIDEB
0	1.36895	0.126	0.036	0	CD14M_1	C16orf70
0	2.10807	0.107	0.017	0	CD14M_1	SLC16A5
0	2.45503	0.102	0.012	0	CD14M_1	CEACAM4
0	1.97104	0.109	0.019	0	CD14M_1	ARSD
0	1.19388	0.133	0.044	0	CD14M_1	UBXN2B
0	1.17159	0.135	0.046	0	CD14M_1	LINGO1
0	1.25623	0.132	0.043	0	CD14M_1	SMARCD2
0	1.52921	0.117	0.028	0	CD14M_1	ICAM1
0	0.676647	0.162	0.073	0	CD14M_1	DGCR2
0	-6.19833	0.001	0.09	0	CD14M_1	TNFRSF25
0	1.18423	0.131	0.042	0	CD14M_1	RIT1
0	1.01537	0.144	0.055	0	CD14M_1	IER5
0	0.659284	0.152	0.063	0	CD14M_1	KLF7
0	0.765531	0.148	0.059	0	CD14M_1	MAN1A1
0	1.2988	0.126	0.037	0	CD14M_1	EEPD1
0	1.27431	0.124	0.035	0	CD14M_1	CPEB3
0	-5.50795	0.003	0.092	0	CD14M_1	PLCG1
0	1.40638	0.127	0.038	0	CD14M_1	IRAK1
0	0.957993	0.14	0.052	0	CD14M_1	MEF2D
0	0.710984	0.16	0.072	0	CD14M_1	CPT1A
0	1.22795	0.13	0.042	0	CD14M_1	ANO10
0	1.93128	0.108	0.02	0	CD14M_1	NCEH1
0	1.44396	0.112	0.024	0	CD14M_1	GAB1
0	1.32401	0.127	0.039	0	CD14M_1	PPIF
0	0.862899	0.15	0.062	0	CD14M_1	WBP1L
0	2.00008	0.104	0.016	0	CD14M_1	AC020916.1
0	-5.83232	0.002	0.09	0	CD14M_1	ZNF831
0	-5.21376	0.003	0.091	0	CD14M_1	RGL4
0	0.969387	0.133	0.046	0	CD14M_1	SMURF1
0	1.09528	0.137	0.05	0	CD14M_1	REEP4
0	2.36247	0.099	0.012	0	CD14M_1	SLC46A2
0	1.12415	0.132	0.045	0	CD14M_1	SUFU
0	0.940318	0.136	0.049	0	CD14M_1	FAM168A
0	2.53528	0.098	0.011	0	CD14M_1	ARPIN
0	1.005	0.136	0.049	0	CD14M_1	MAVS
0	0.874249	0.144	0.057	0	CD14M_1	FHL3
0	0.823317	0.149	0.062	0	CD14M_1	NISCH
0	-4.42589	0.007	0.094	0	CD14M_1	SIDT1
0	-6.90566	0.001	0.088	0	CD14M_1	LINC02273
0	0.660879	0.157	0.07	0	CD14M_1	YTHDF3
0	2.31648	0.103	0.016	0	CD14M_1	TBC1D12
0	1.00666	0.145	0.058	0	CD14M_1	GDE1
0	1.73313	0.111	0.024	0	CD14M_1	VPS9D1
0	0.814007	0.153	0.066	0	CD14M_1	MSL1
0	-4.78102	0.005	0.092	0	CD14M_1	CD226
0	0.917567	0.15	0.063	0	CD14M_1	MARCH2
0	-6.07143	0.001	0.088	0	CD14M_1	UBASH3A
0	0.890713	0.139	0.053	0	CD14M_1	ROCK2
0	0.968724	0.139	0.053	0	CD14M_1	AMFR
0	2.39149	0.099	0.013	0	CD14M_1	PLA2G4A
0	2.36405	0.099	0.013	0	CD14M_1	ACPP
0	0.936945	0.136	0.05	0	CD14M_1	FIG4
0	0.660361	0.159	0.073	0	CD14M_1	ZFP91
0	2.40332	0.099	0.013	0	CD14M_1	OLIG1
0	2.73725	0.093	0.007	0	CD14M_1	PADI2
0	0.87436	0.146	0.06	0	CD14M_1	MXD4
0	0.692197	0.154	0.068	0	CD14M_1	GSR
0	1.04234	0.125	0.039	0	CD14M_1	MCU
0	0.270384	0.149	0.063	0	CD14M_1	TCF7L2
0	1.31406	0.126	0.04	0	CD14M_1	SLC22A18
0	2.10488	0.102	0.016	0	CD14M_1	FLVCR2
0	-5.04915	0.004	0.09	0	CD14M_1	PRR5
0	0.979836	0.136	0.051	0	CD14M_1	KLHDC10
0	1.03132	0.138	0.053	0	CD14M_1	IFFO1
0	0.87669	0.136	0.051	0	CD14M_1	ATRN
0	2.40442	0.095	0.01	0	CD14M_1	CYP1B1-AS1
0	1.22993	0.128	0.043	0	CD14M_1	SLC12A7
0	1.09854	0.133	0.048	0	CD14M_1	SNN
0	1.26909	0.122	0.037	0	CD14M_1	PLOD1
0	-7.11971	0.001	0.086	0	CD14M_1	ICOS
0	-6.22127	0.001	0.086	0	CD14M_1	EPHX2
0	1.69193	0.107	0.022	0	CD14M_1	STX3
0	1.94939	0.105	0.02	0	CD14M_1	ARL11
0	1.54565	0.109	0.024	0	CD14M_1	CHSY1
0	0.816767	0.153	0.068	0	CD14M_1	PGP
0	1.21216	0.121	0.036	0	CD14M_1	METRNL
0	1.22552	0.122	0.037	0	CD14M_1	B4GALT5
0	0.632729	0.154	0.069	0	CD14M_1	BRWD3
0	0.940411	0.138	0.054	0	CD14M_1	TUG1
0	0.955449	0.133	0.049	0	CD14M_1	AGPAT4
0	0.76098	0.155	0.071	0	CD14M_1	DYNC1LI2
0	1.39251	0.116	0.032	0	CD14M_1	MNT
0	2.39104	0.094	0.01	0	CD14M_1	DSC2
0	0.958994	0.127	0.043	0	CD14M_1	SIGLEC7
0	2.36651	0.094	0.01	0	CD14M_1	FCAR
0	-7.99199	0.001	0.085	0	CD14M_1	CXCR3
0	-4.229	0.006	0.09	0	CD14M_1	KCNA3
0	-5.12682	0.004	0.088	0	CD14M_1	AC006369.1
0	1.24145	0.118	0.034	0	CD14M_1	ASPH
0	1.97087	0.103	0.019	0	CD14M_1	TRIQK
0	1.23913	0.122	0.038	0	CD14M_1	CDH23
0	1.83976	0.106	0.022	0	CD14M_1	NCKAP5L
0	0.897199	0.141	0.057	0	CD14M_1	P2RX4
0	1.33603	0.12	0.036	0	CD14M_1	AL096870.8
[truncated: 258,459+ more rows]
